# Supplementary material for: Massive variation of short tandem repeats with functional consequences across strains of Arabidopsis thaliana
Source: HighWire-hosted journal article supplement (doi:10.1101/gr.231753.117), 2018-07-03

**LMM, X1\_LD**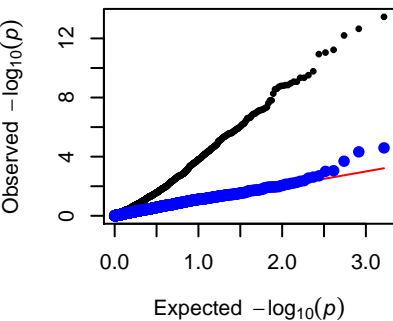**LMM, X2\_LDV**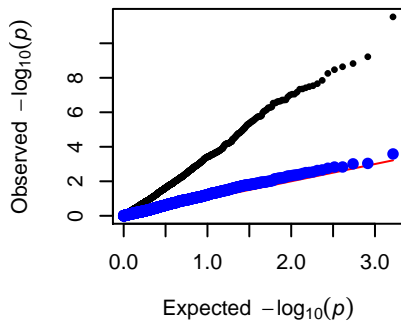**LMM, X6\_FT16**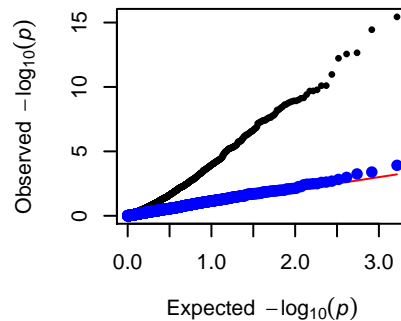**LMM, X7\_FT22**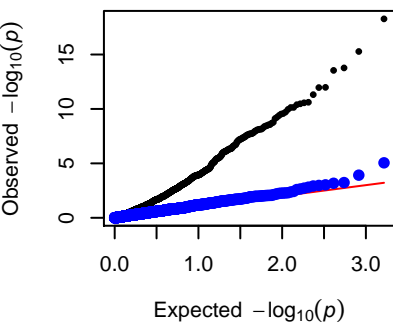**LMM, X8\_Seed.Dormancy**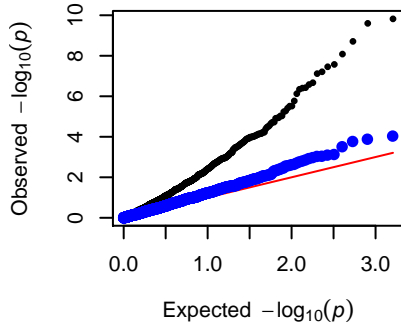**LMM, X9\_Emco5**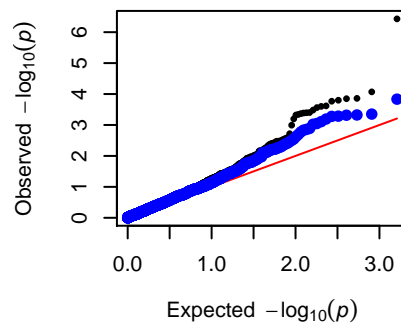**LMM, X15\_B11**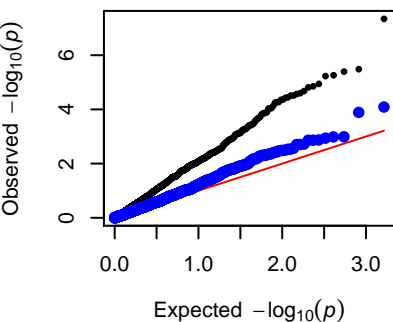**LMM, X17\_Mg25**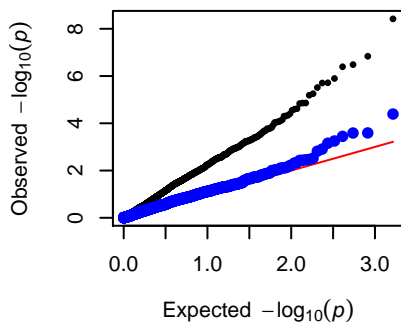**LMM, X32\_avrPphB**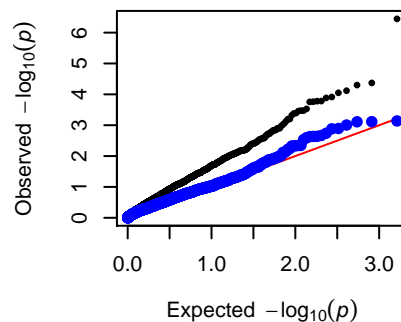

**LMM, X40\_2W**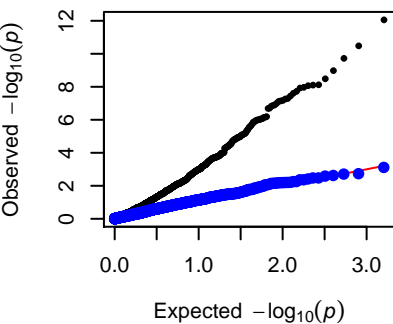**LMM, X41\_4W**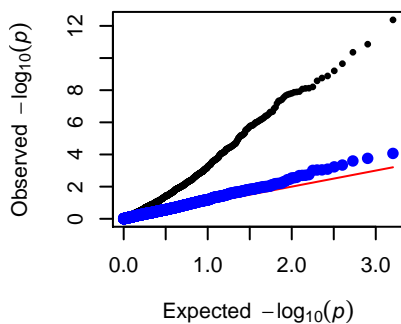**LMM, X47\_0W.GH.FT**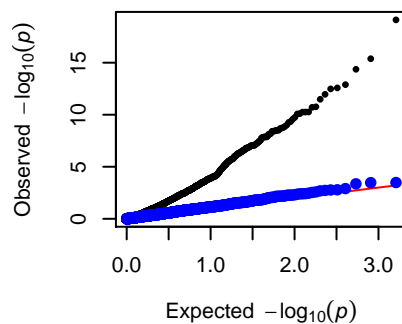**LMM, X59\_FT.GH**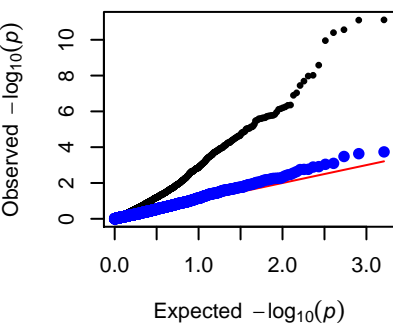**LMM, X61\_LC.Duration.GH**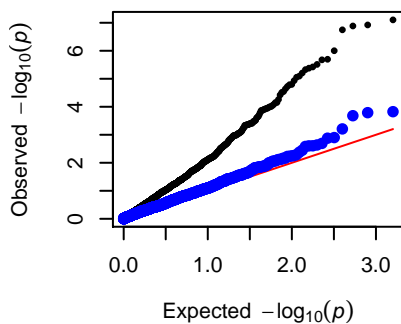**LMM, X62\_LFS.GH**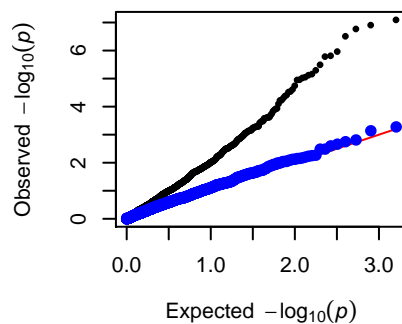**LMM, X77\_LES**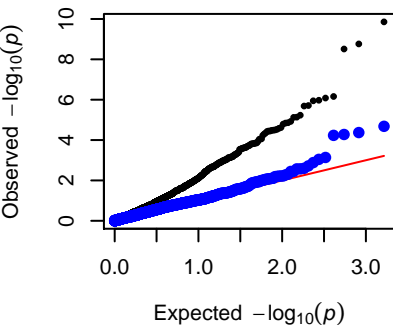**LMM, X79\_LY**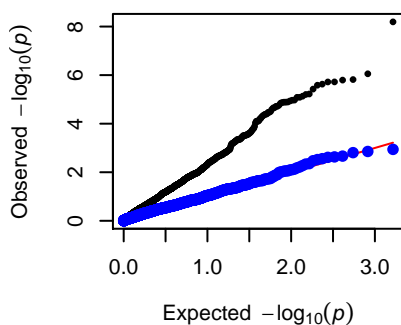**LMM, X80\_LN10**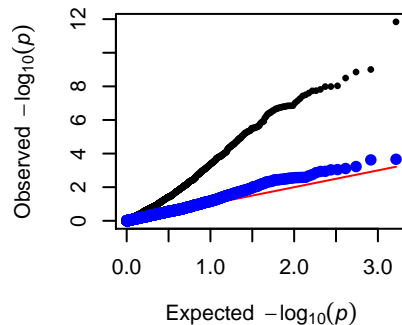

LMM, X175\_Leaf.serr.22

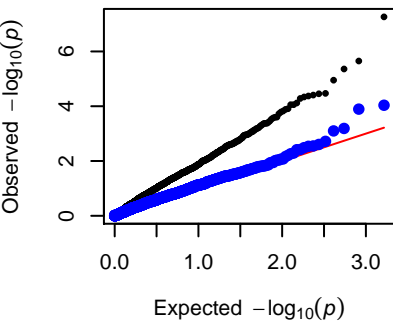

LMM, X186\_Bacterial.titer

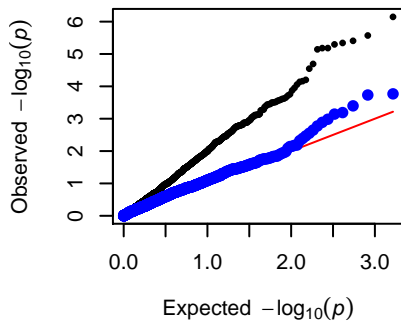

LMM, X277\_Secondary.Dormanc

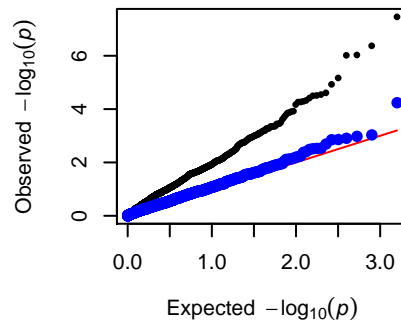

LMM, X279\_DS50

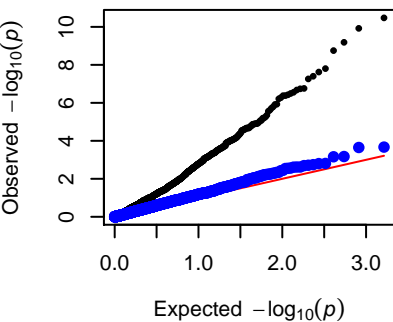

LMM, X281\_Storage.7.days

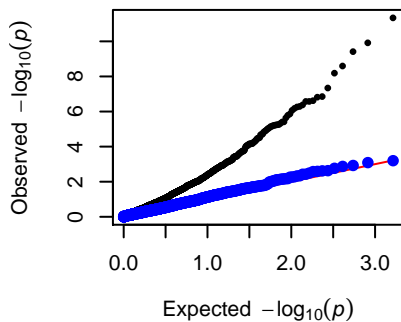

LMM, X282\_Storage.28.days

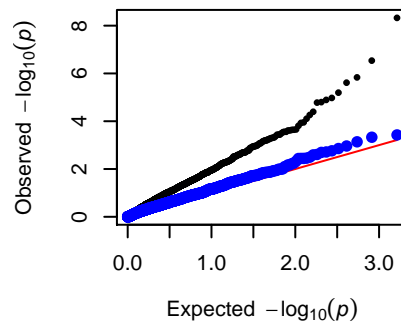

LMM, X283\_Storage.56.days

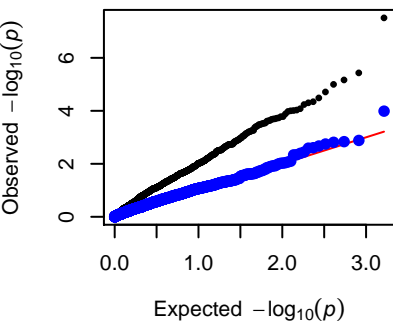

Supplement: Supplemental_File_S4.zip [file qqplot_mma_sigsonly_032017.pdf › Ath_STRs/output/qqplot_mma_sigsonly_032017.pdf]
