# Supplementary material for: Massive variation of short tandem repeats with functional consequences across strains of Arabidopsis thaliana
Source: HighWire-hosted journal article supplement (doi:10.1101/gr.231753.117), 2018-07-03

**X1\_LD**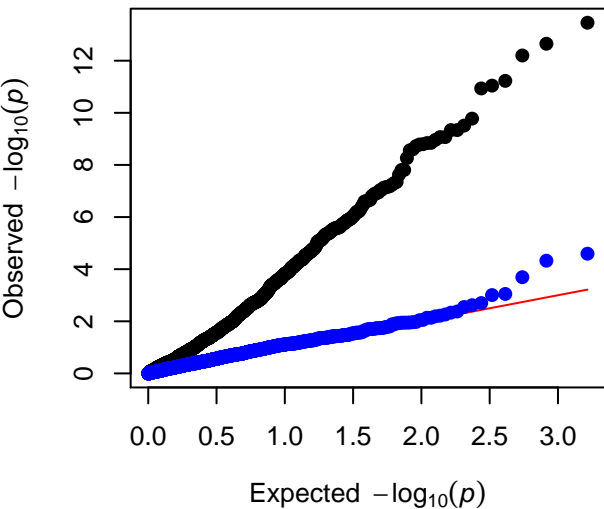**X2\_LDV**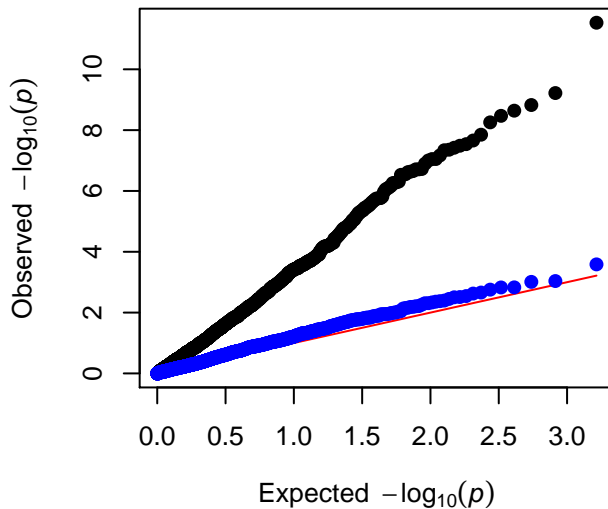**X3\_SD**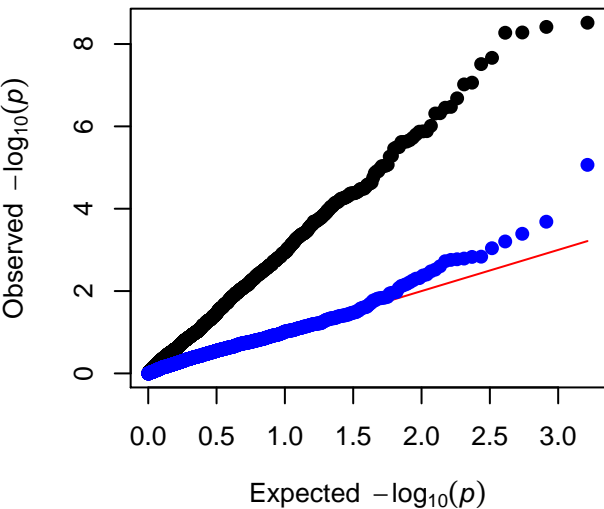**X5\_FT10**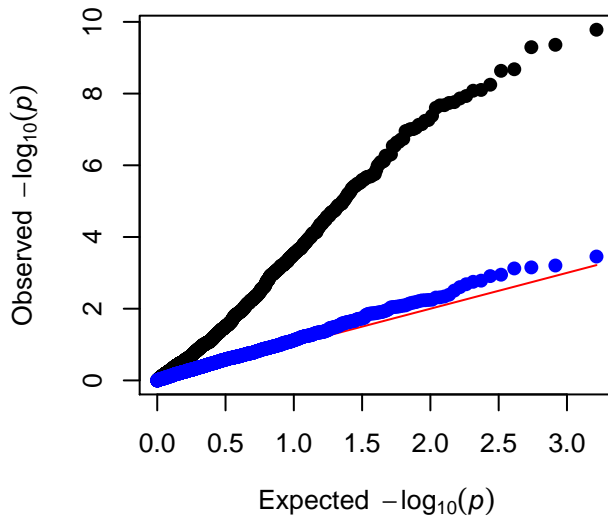

**X6\_FT16**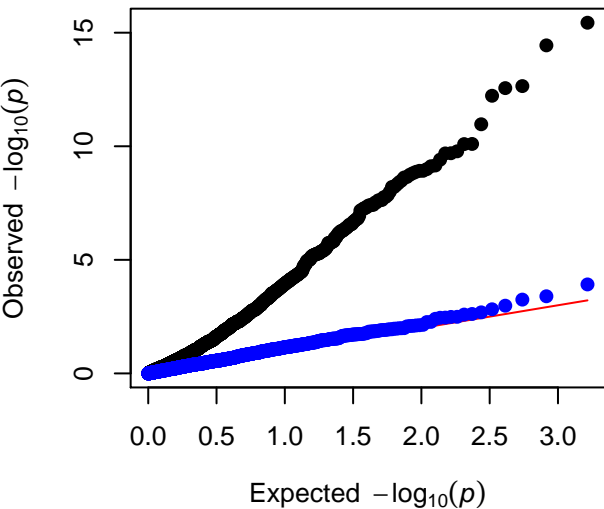**X7\_FT22**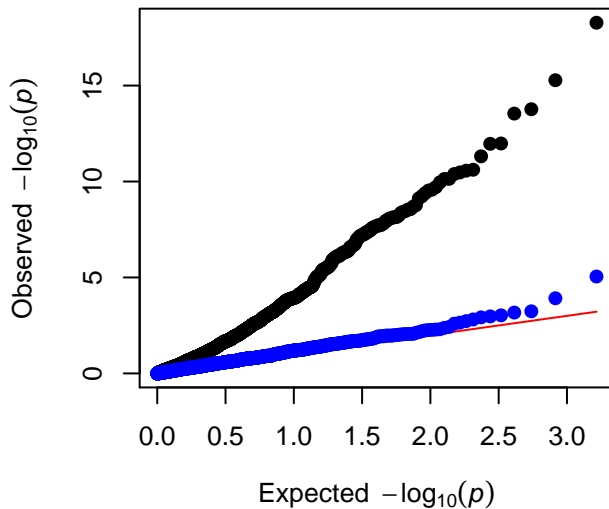**X8\_Seed.Dormancy**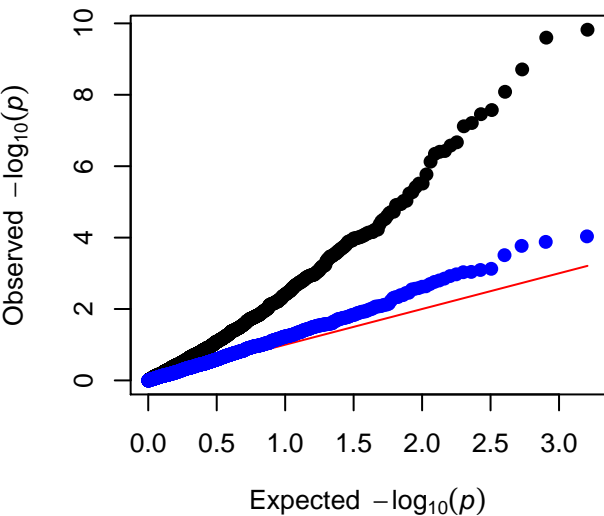**X9\_Emco5**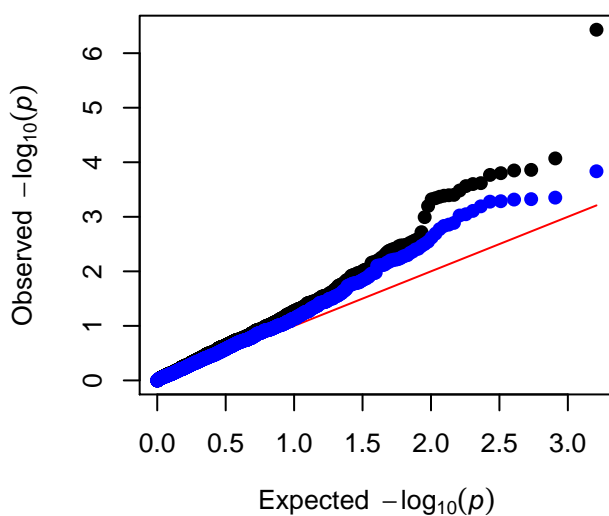

**X10\_Emwa1**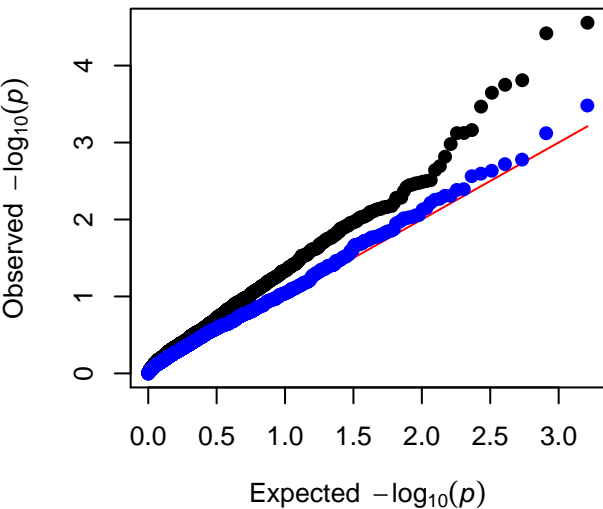**X11\_Emoy.**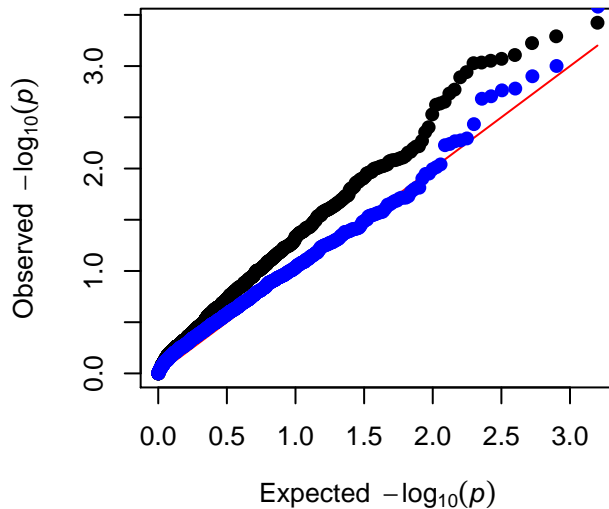**X12\_Hiks1**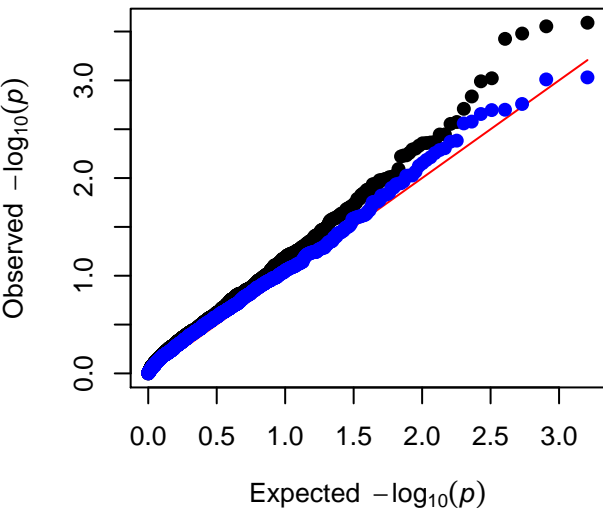**X13\_Noco2**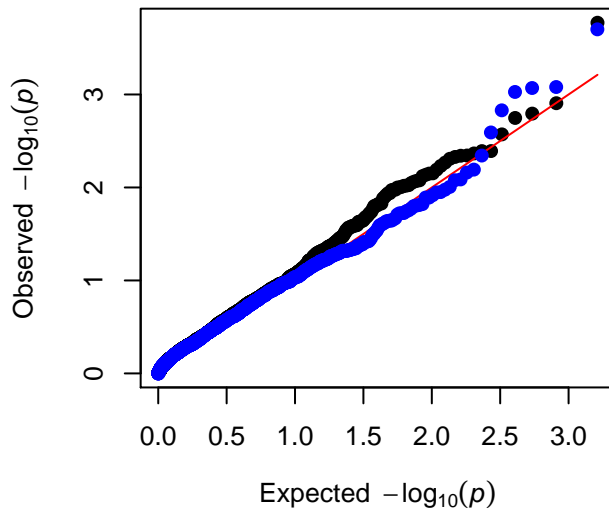

**X14\_Li7**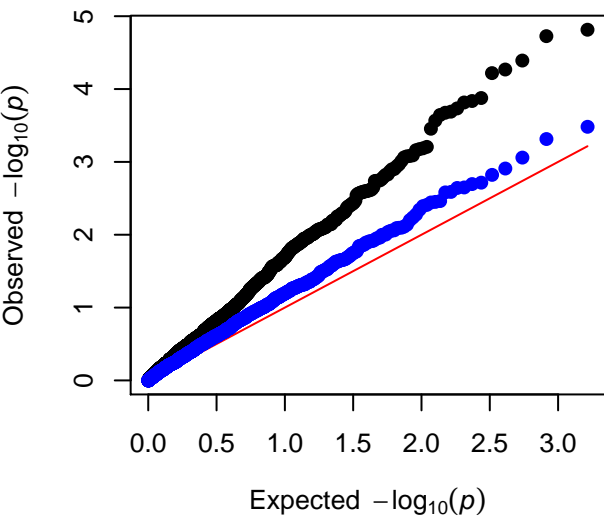**X15\_B11**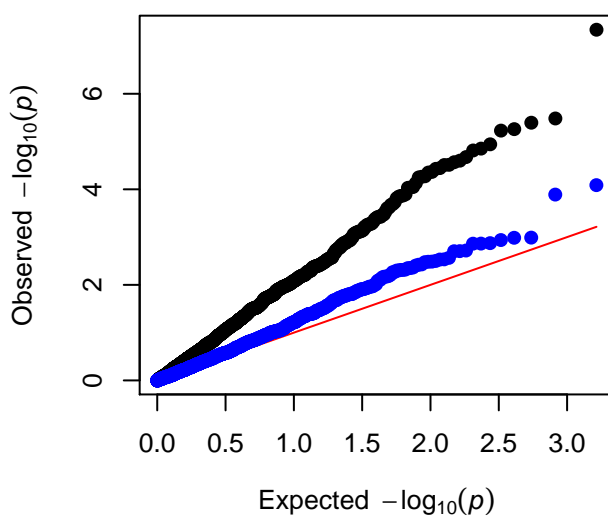**X17\_Mg25**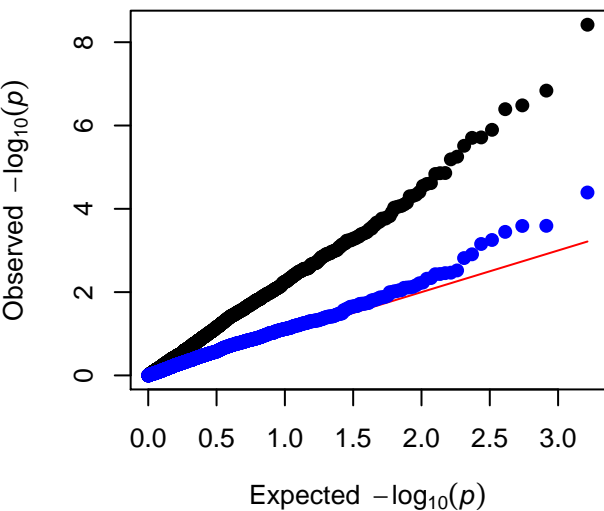**X18\_P31**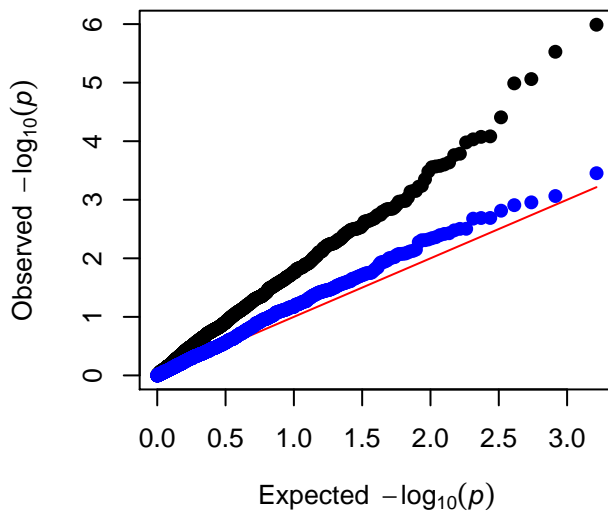

**X19\_S34**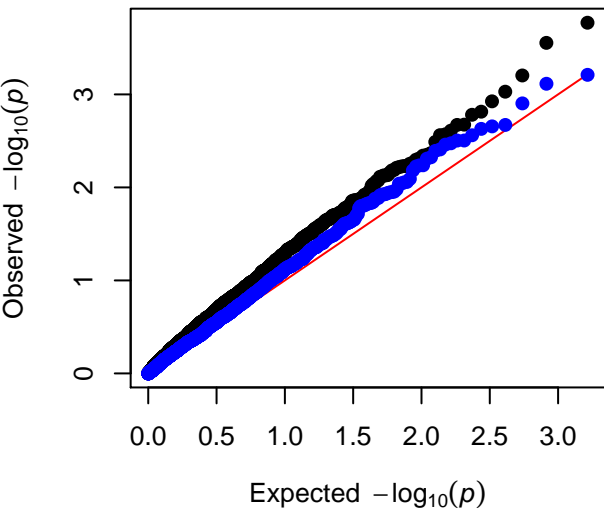**X21\_Ca43**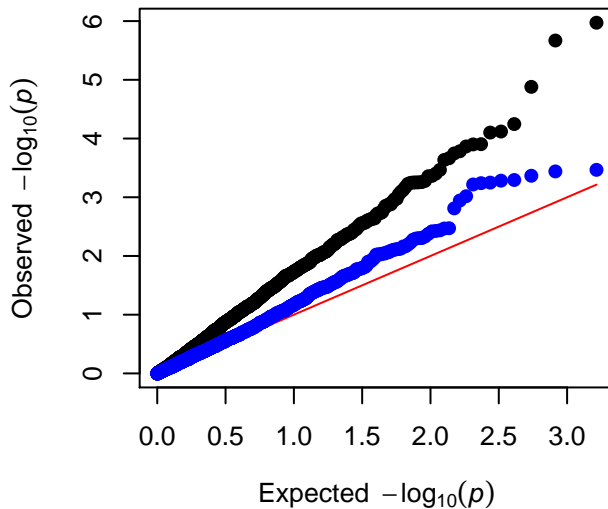**X22\_Mn55**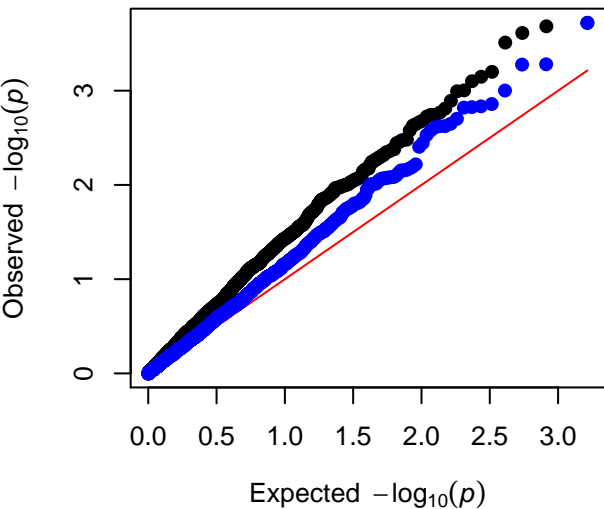**X23\_Fe56**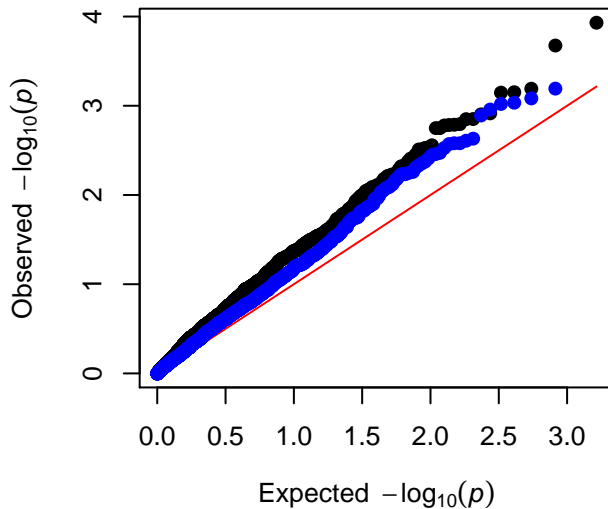

**X26\_Cu65**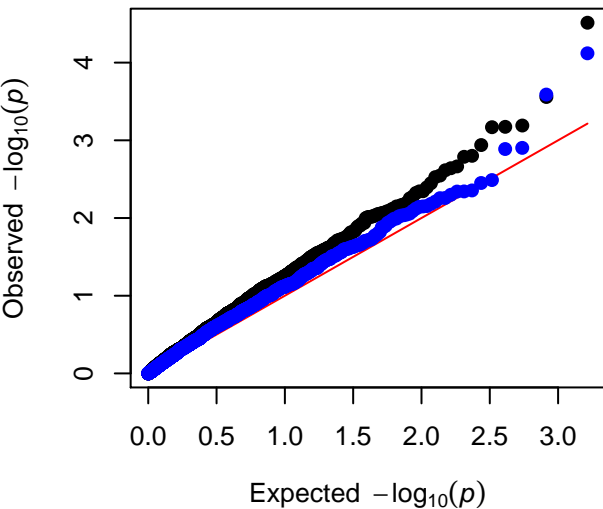**X27\_Zn66**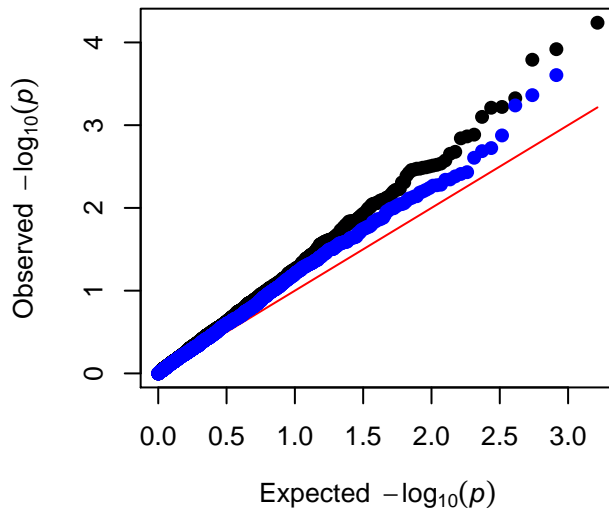**X28\_As75**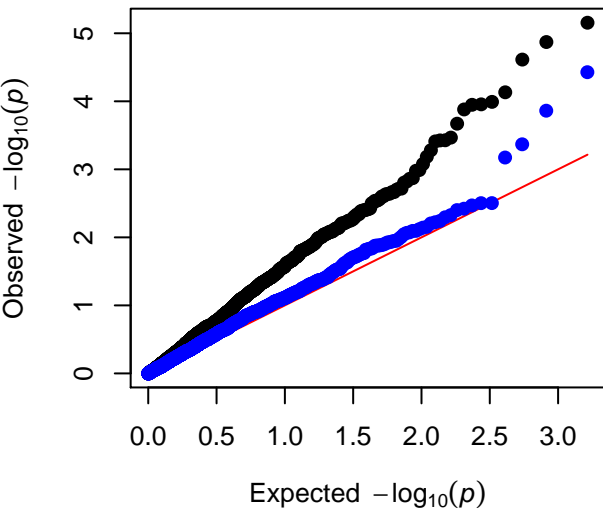**X29\_Se82**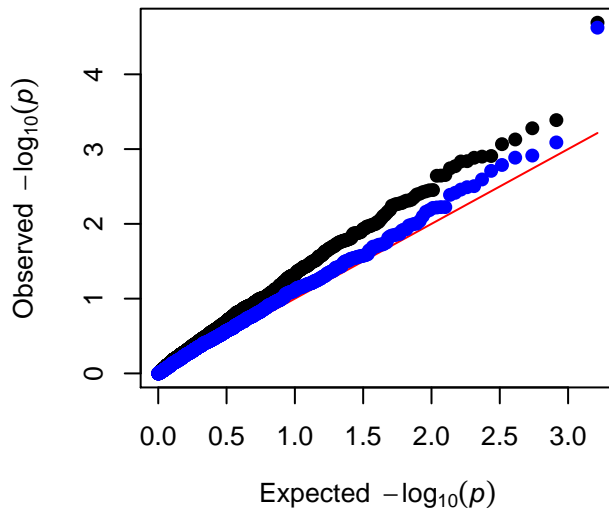

**X31\_Cd114**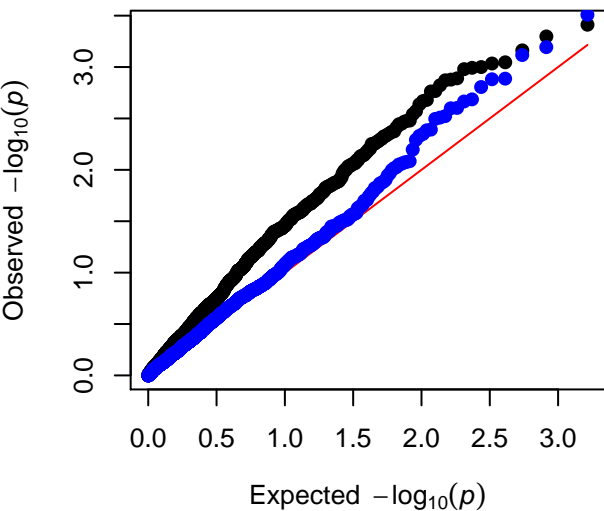**X32\_avrPphB**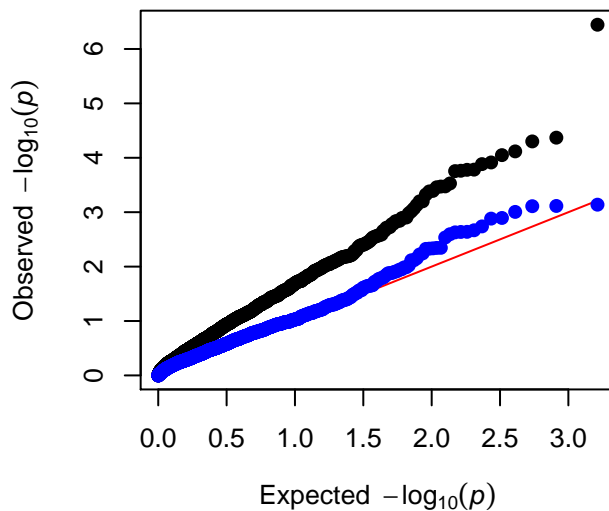**X33\_avrRpm1**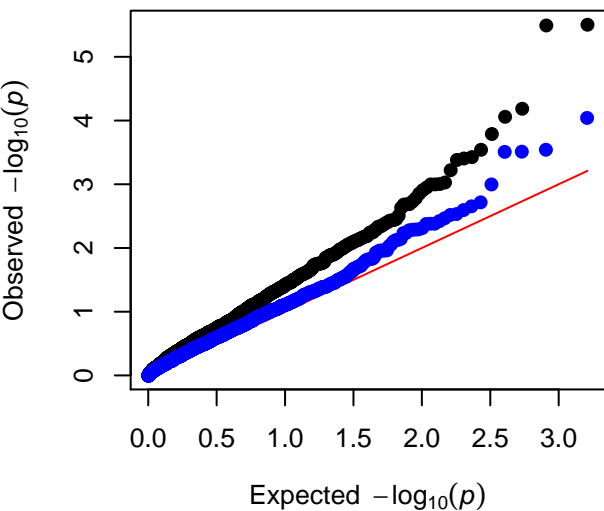**X35\_avrB**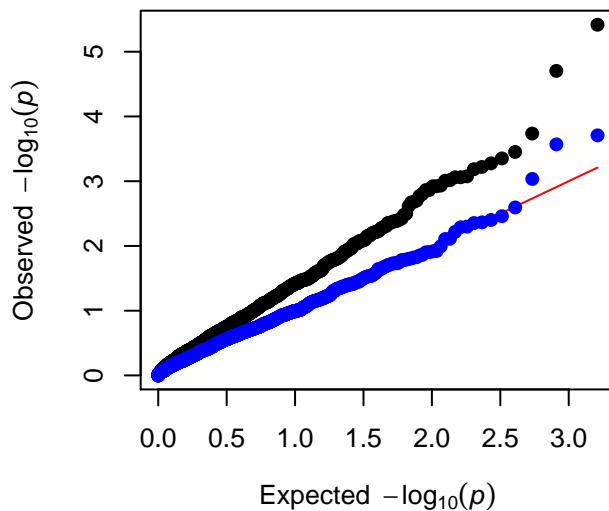

**X39\_0W**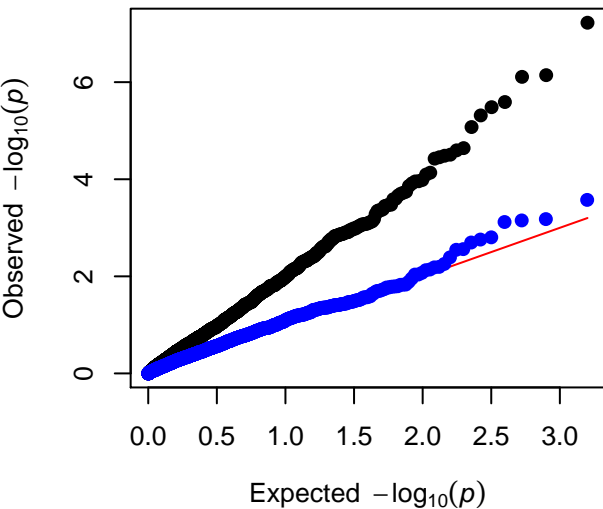**X40\_2W**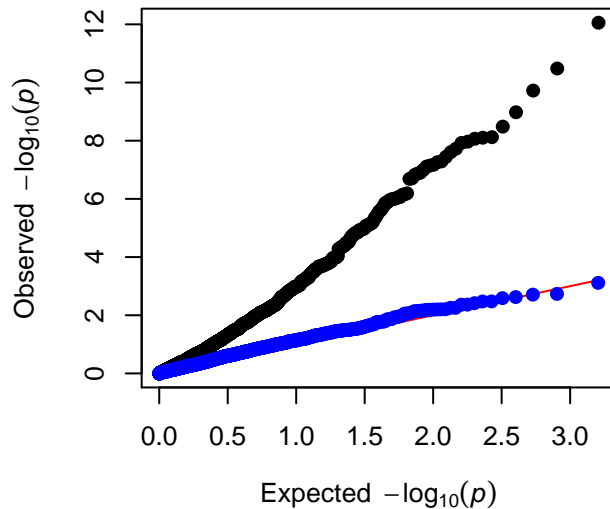**X41\_4W**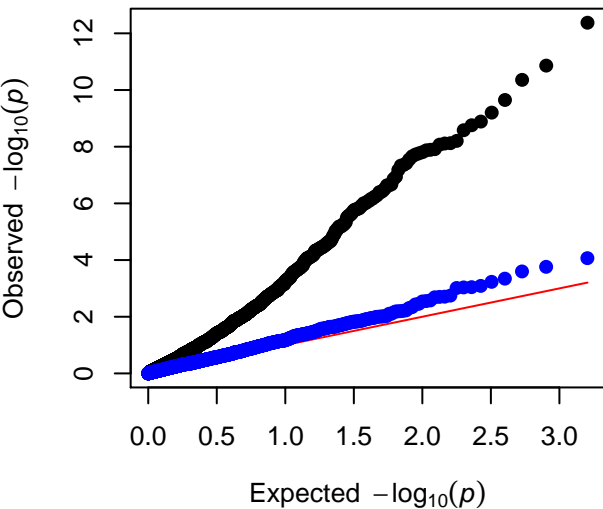**X42\_8W**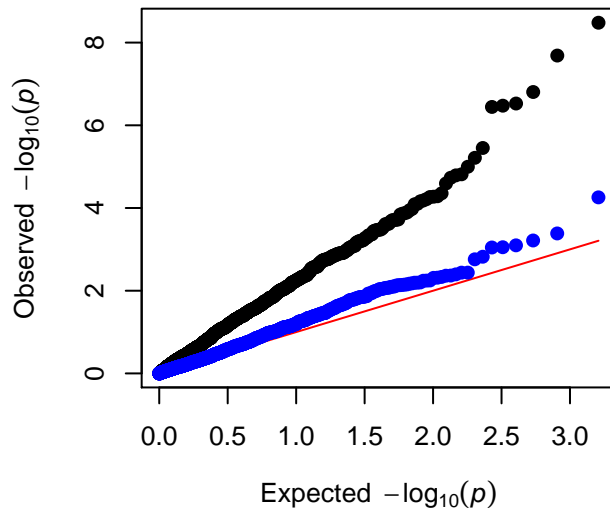



**X43\_FLC**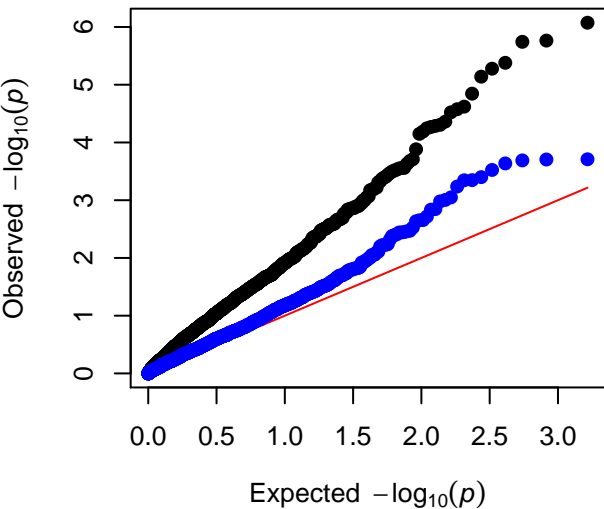**X44\_FRI**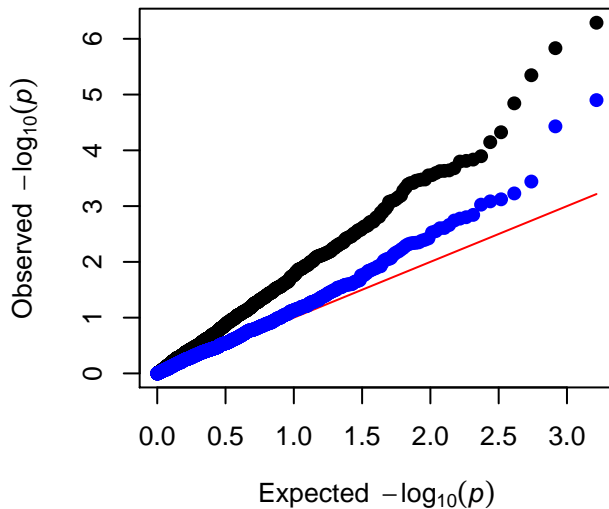**X47\_OW.GH.FT**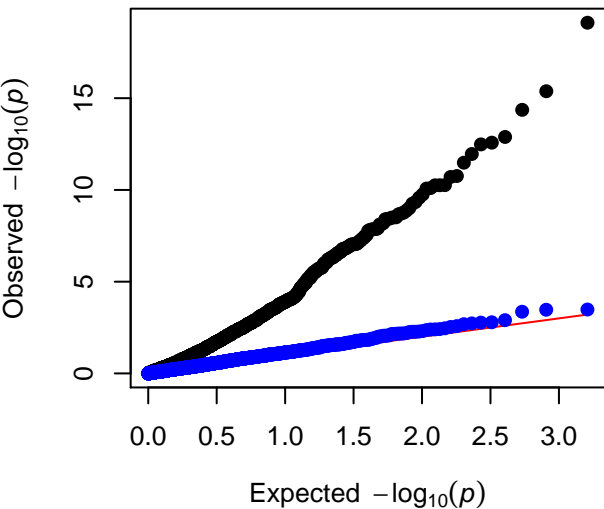**X48\_OW.GH.LN**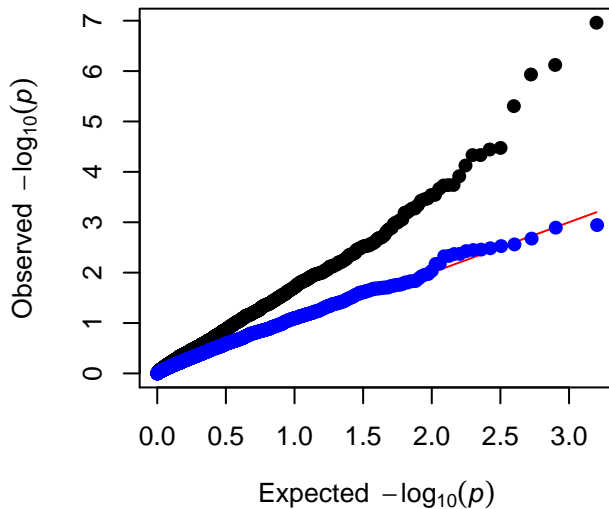

**X58\_FT.Diameter.Field**

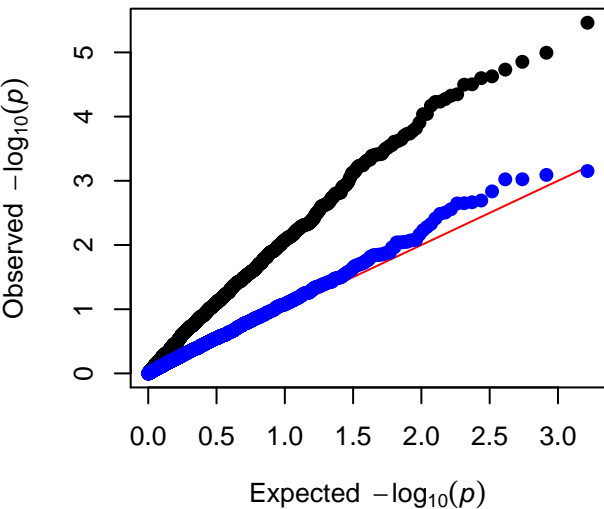

**X59\_FT.GH**

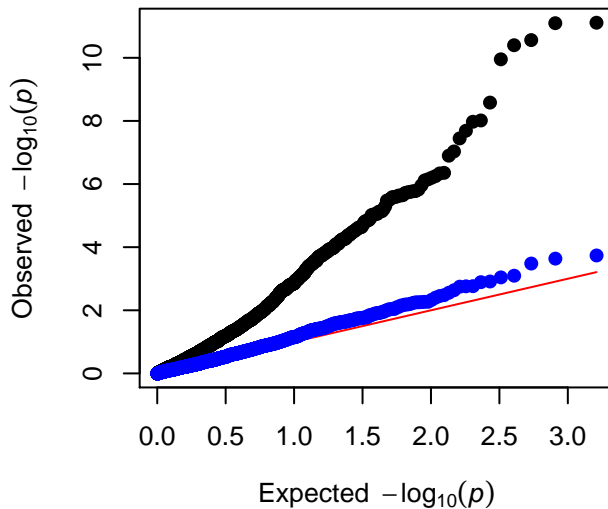

**X60\_FT.Duration.GH**

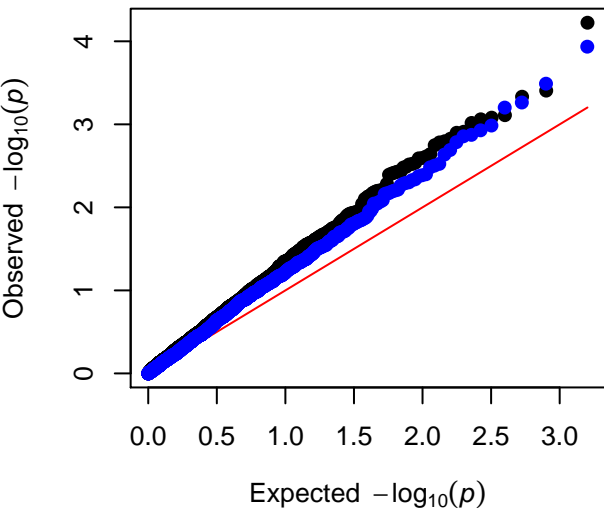

**X61\_LC.Duration.GH**

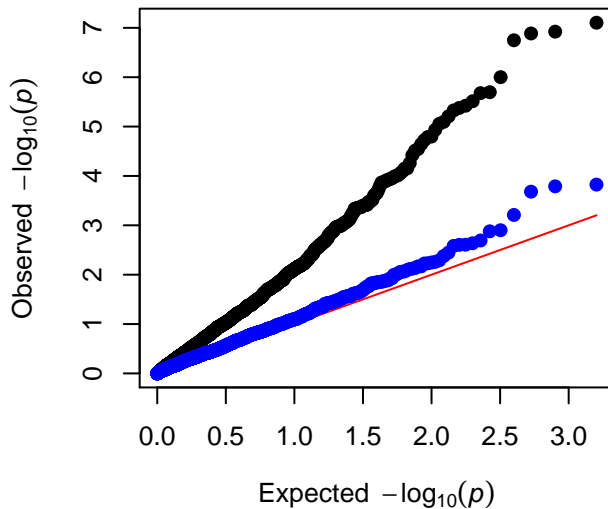

**X62\_LFS.GH**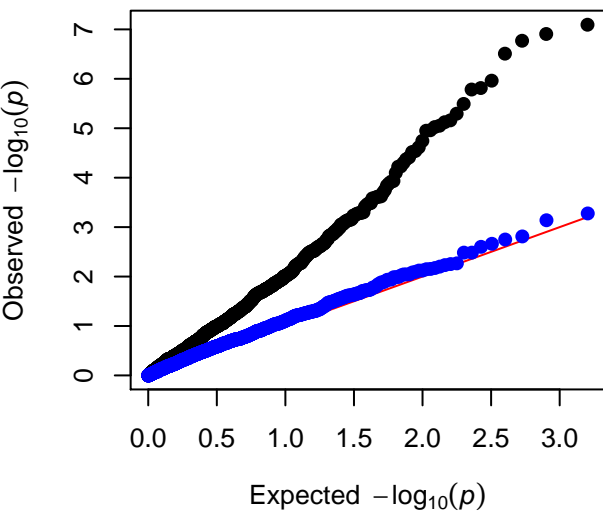**X63\_MT.GH**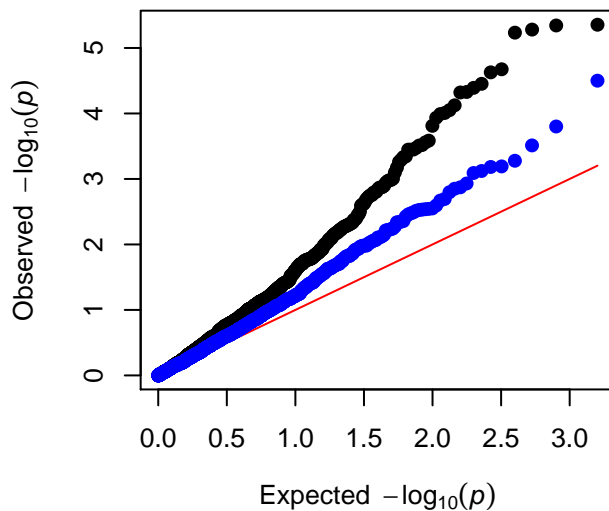**X64\_RP.GH**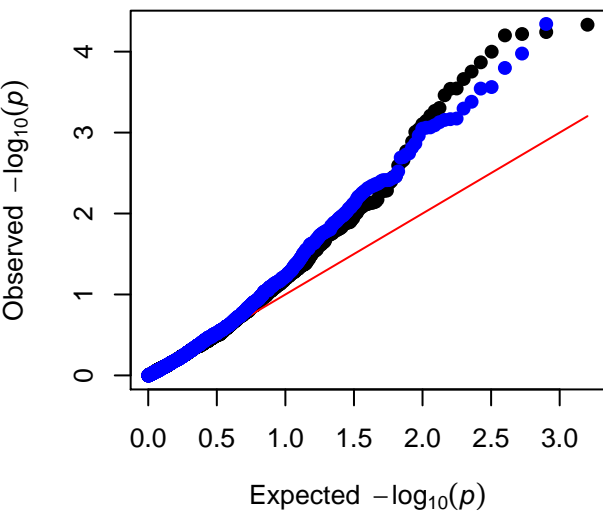**X65\_At1**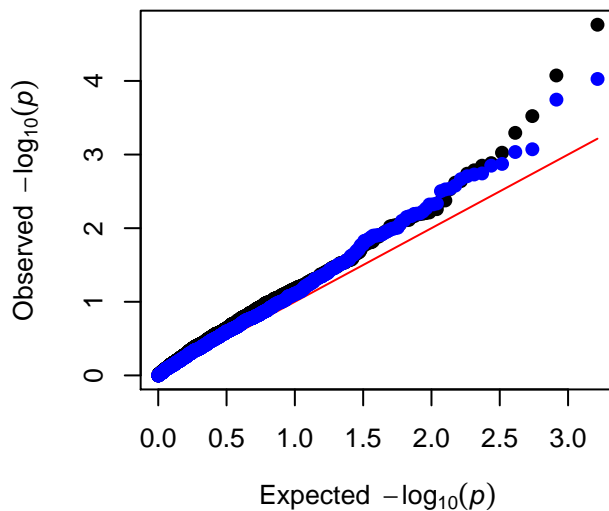

**X66\_At1.CFU2**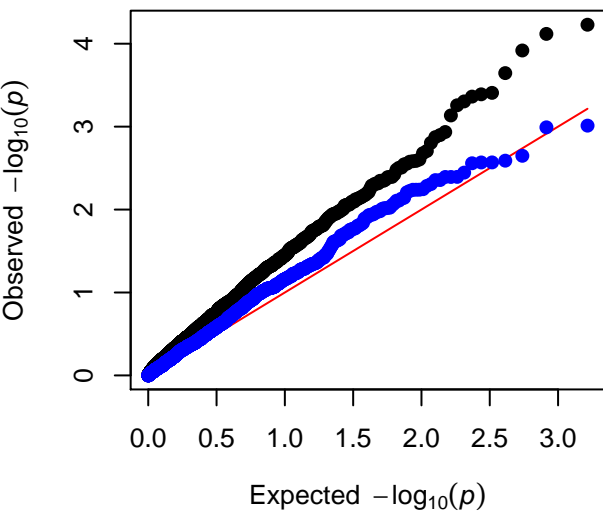**X67\_As**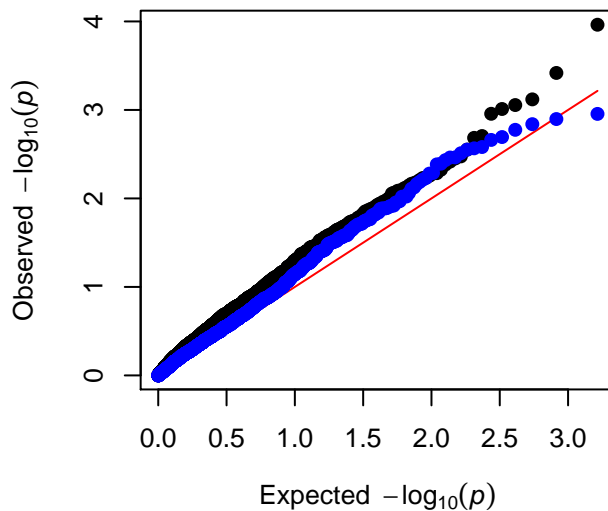**X68\_As.CFU2**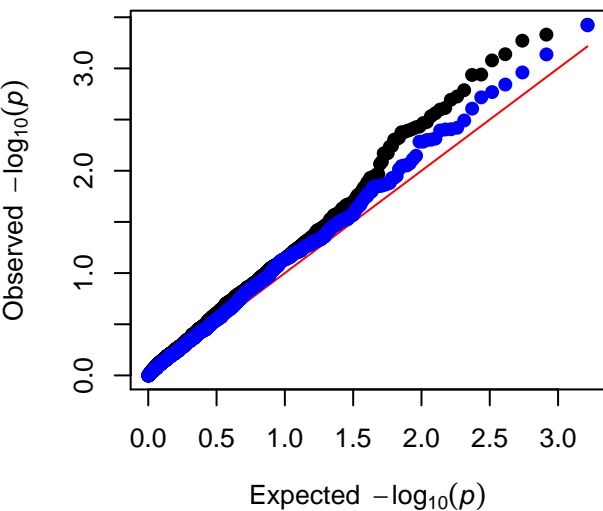**X69\_Bs**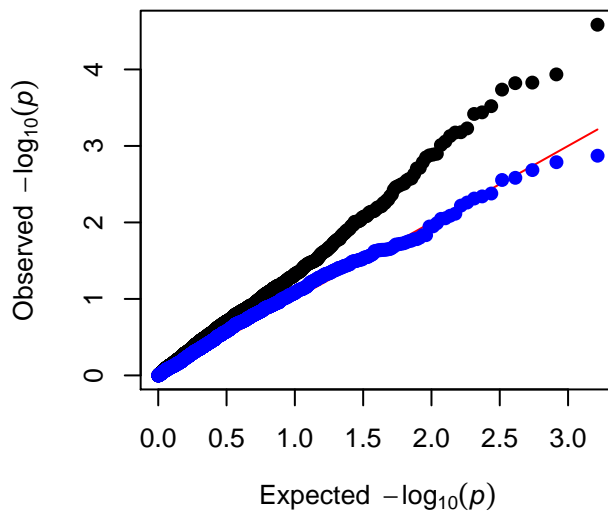

**X70\_Bs.CFU2**

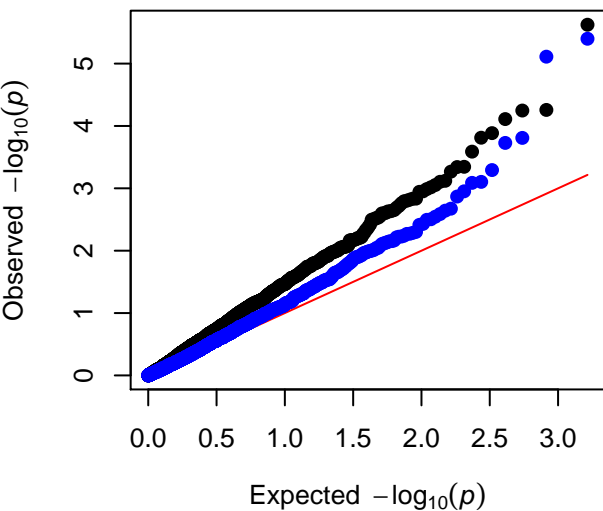

**X71\_At2**

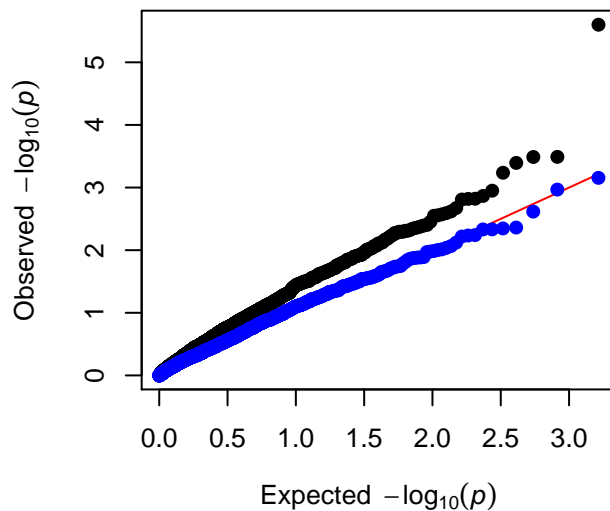

**X72\_At2.CFU2**

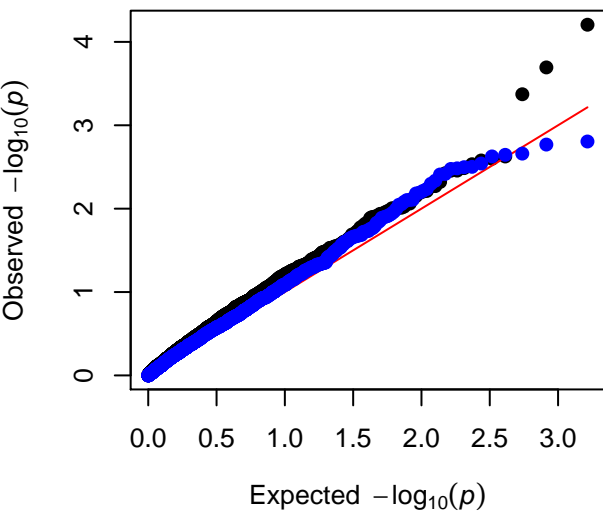

**X73\_As2**

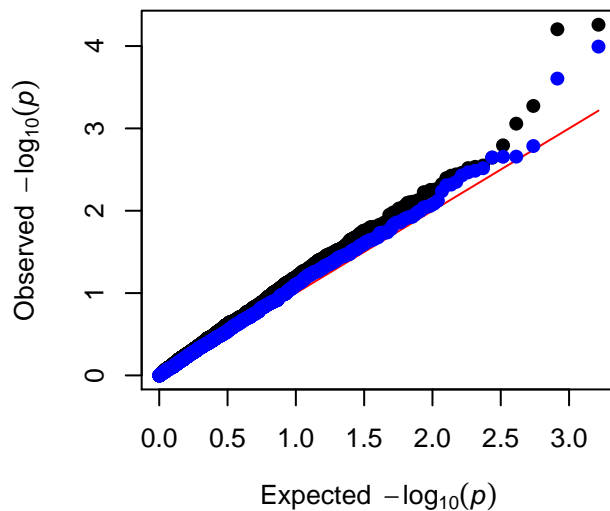

**X74\_As2.CFU2**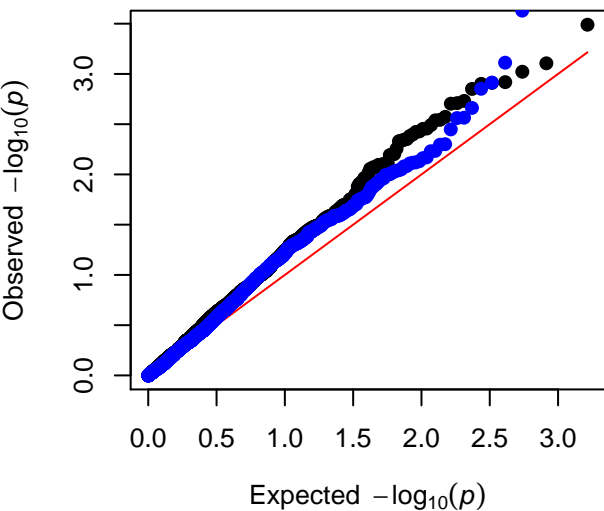**X75\_FW**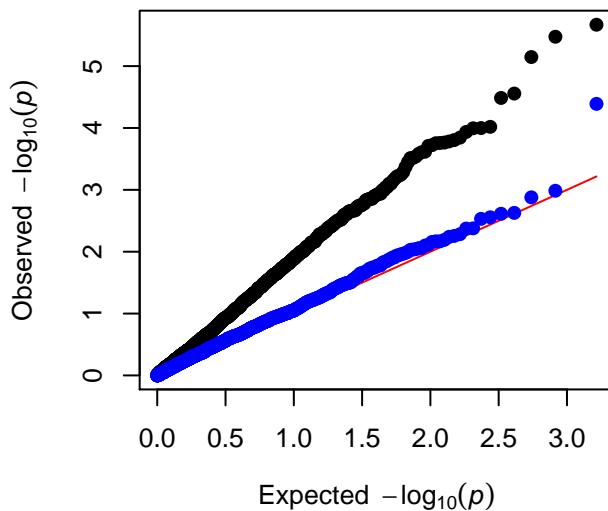**X76\_DW**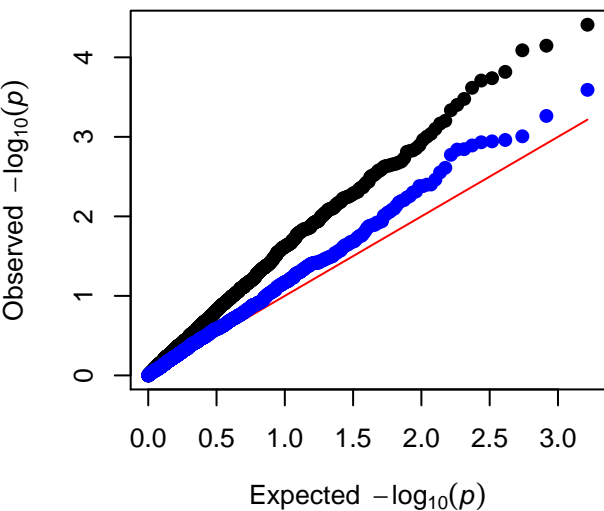**X77\_LES**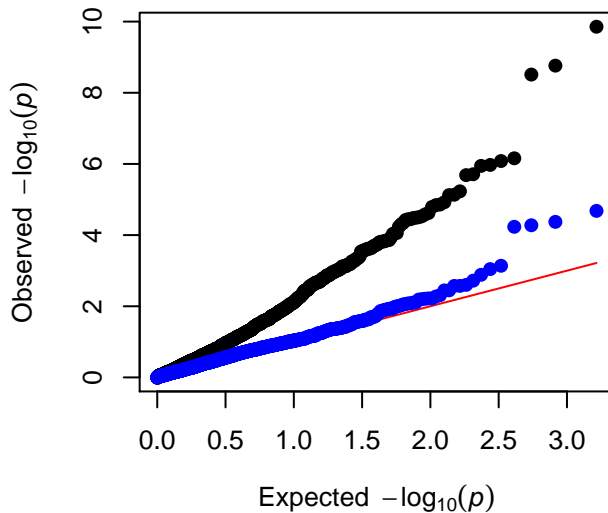

**X79\_LY**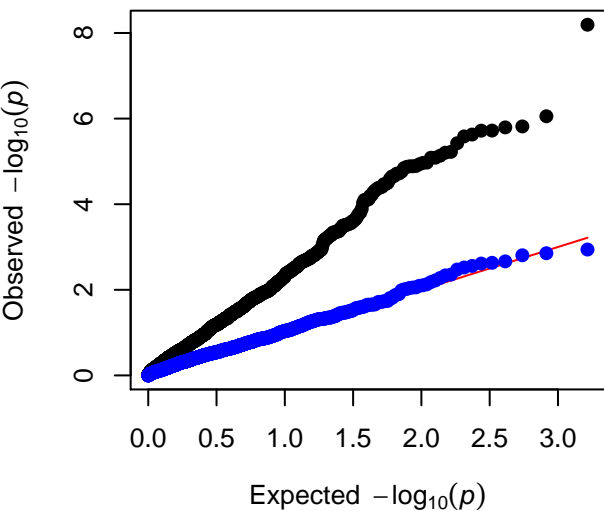**X80\_LN10**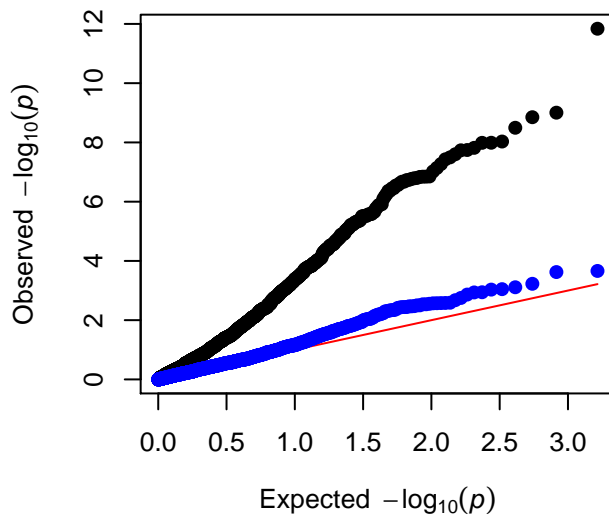**X81\_LN16**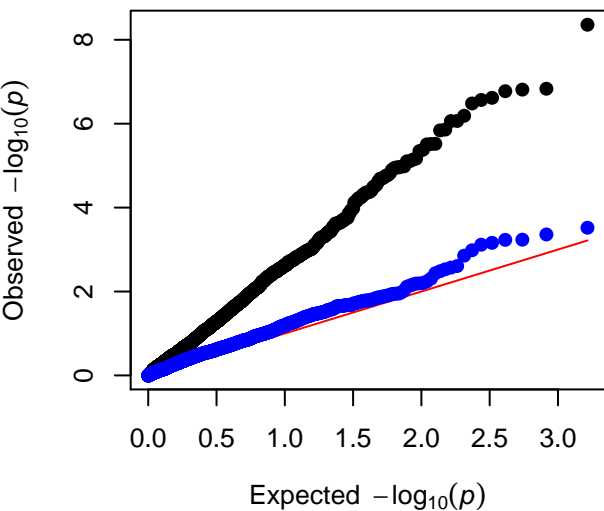**X82\_LN22**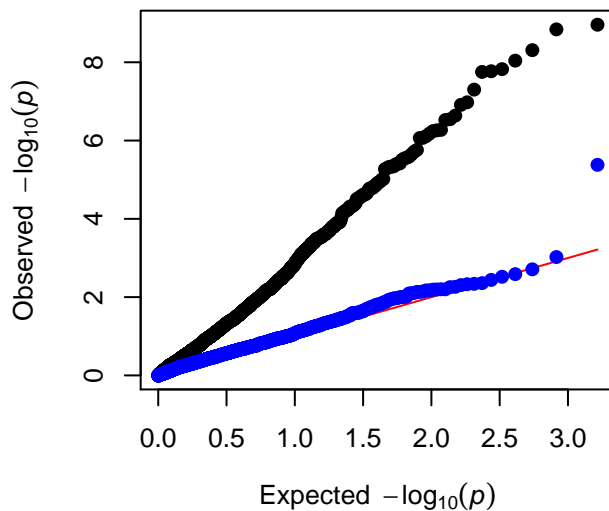

**X161\_Germ.10**

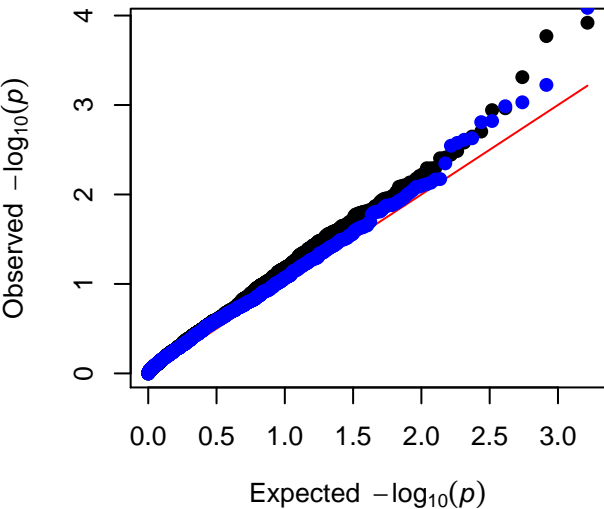

**X163\_Germ.22**

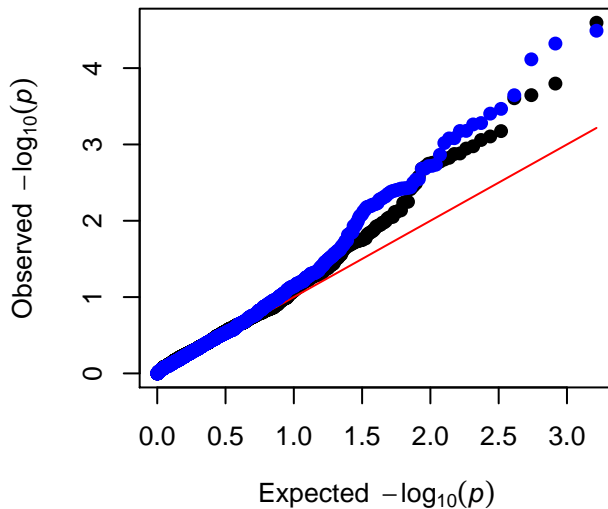

**X165\_Width.16**

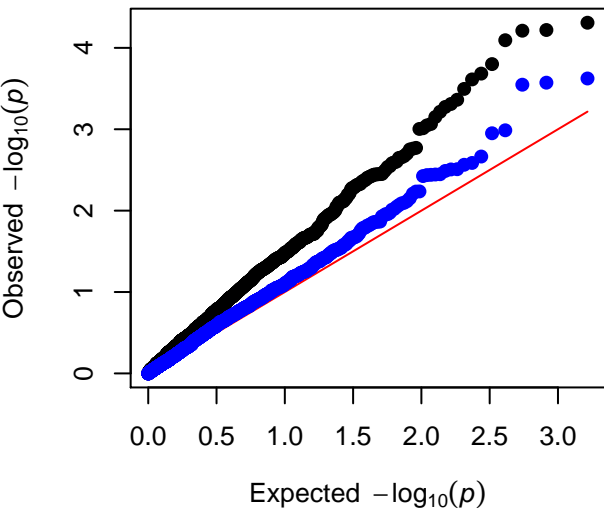

**X166\_Width.22**

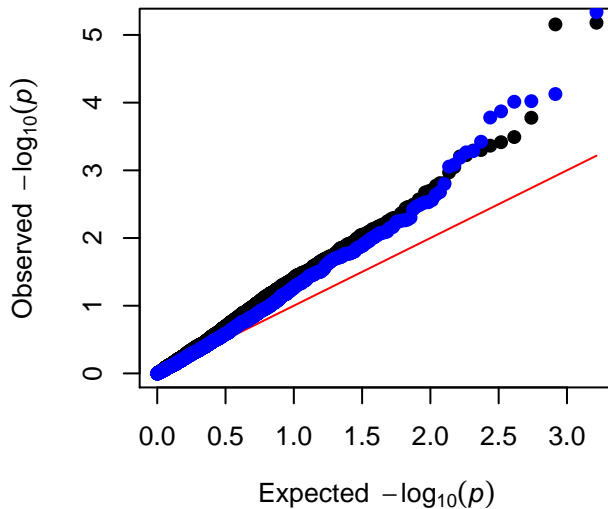



**X168\_Chlorosis.16**

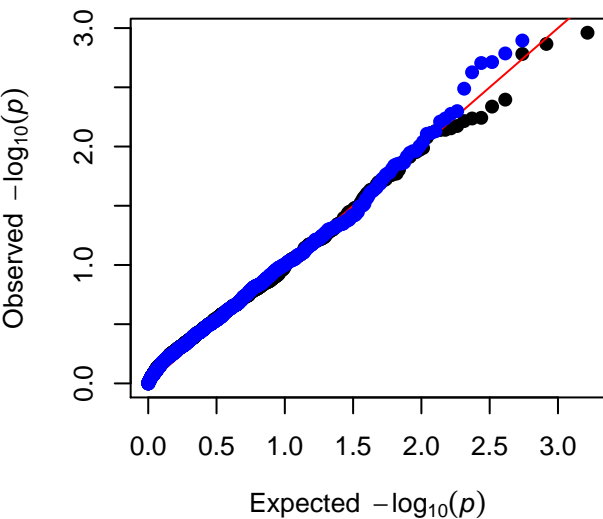

**X170\_Anthocyanin.10**

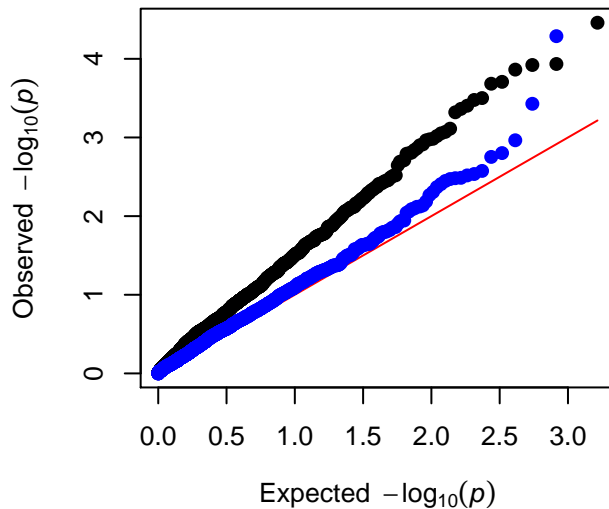

**X171\_Anthocyanin.16**

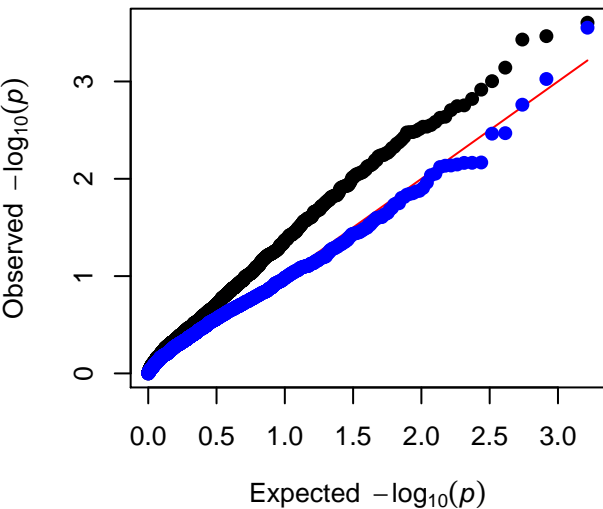

**X172\_Anthocyanin.22**

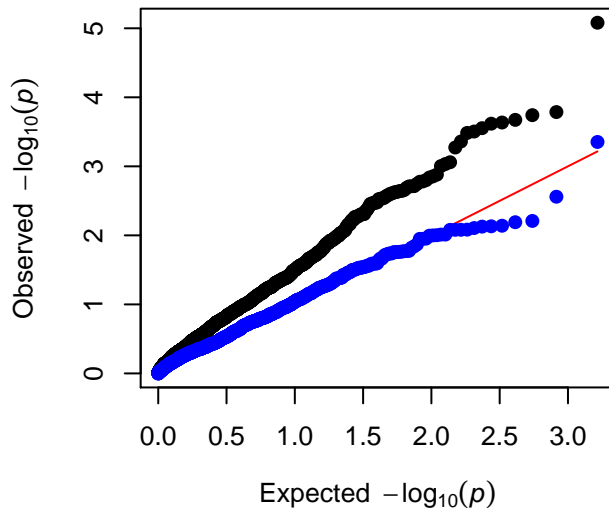

**X173\_Leaf.serr.10**

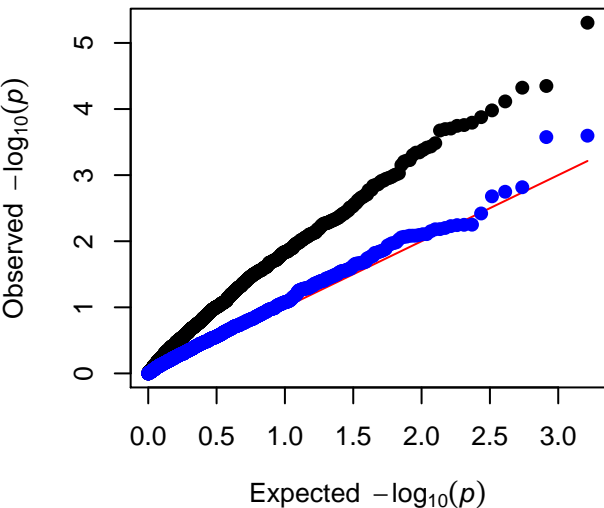

**X174\_Leaf.serr.16**

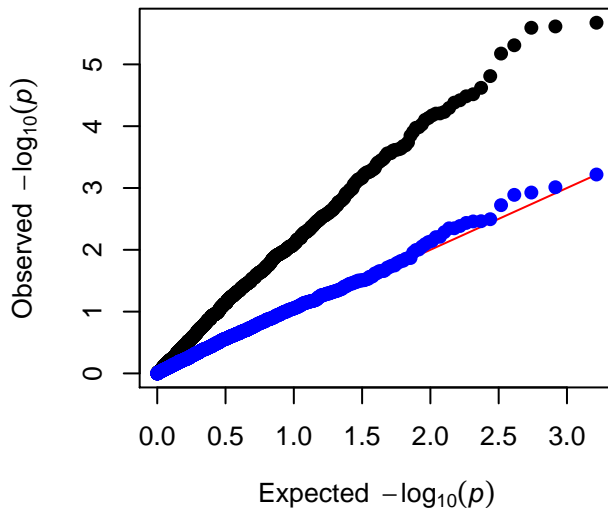

**X175\_Leaf.serr.22**

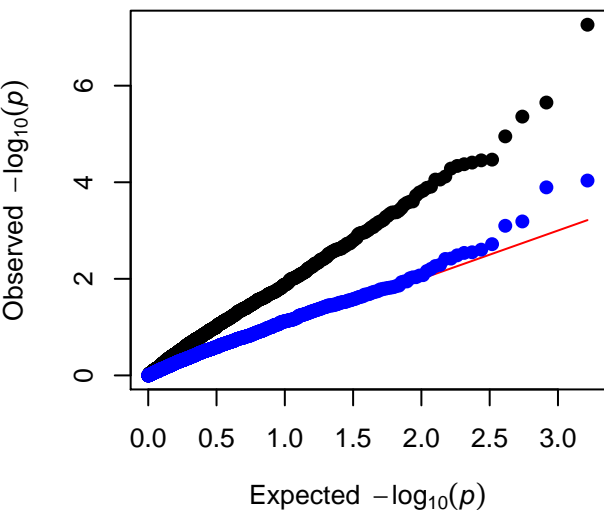

**X176\_Leaf.roll.10**

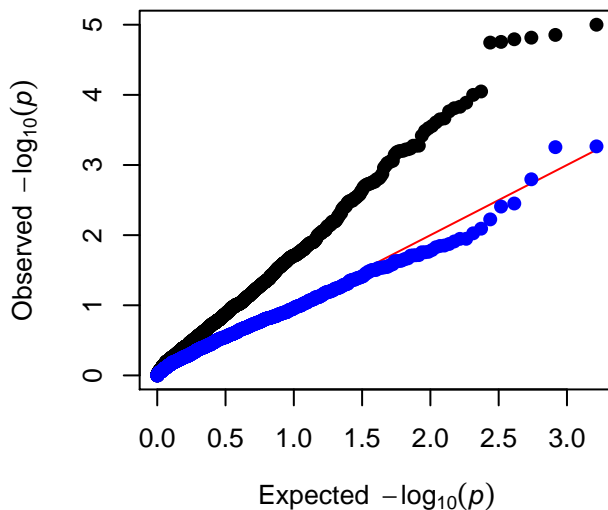

**X177\_Leaf.roll.16**

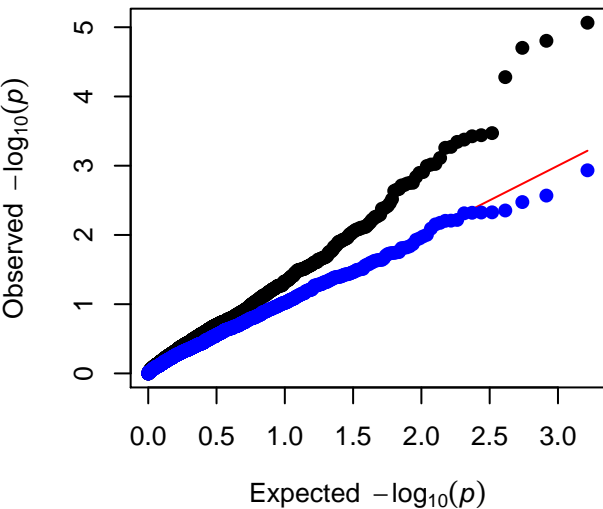

**X179\_Rosette.Erect.22**

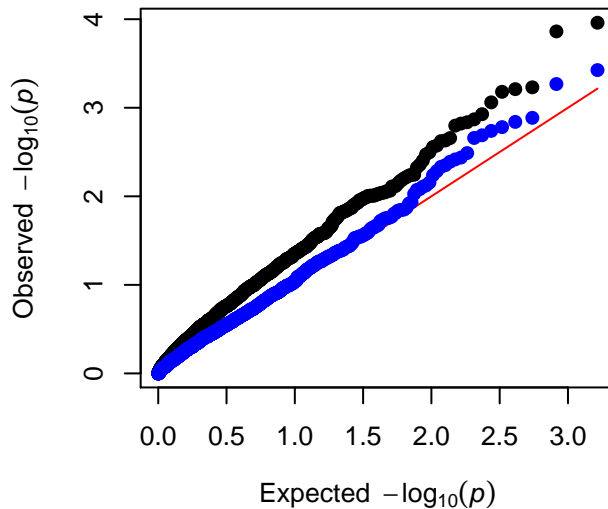

**X182\_Hypocotyl.length**

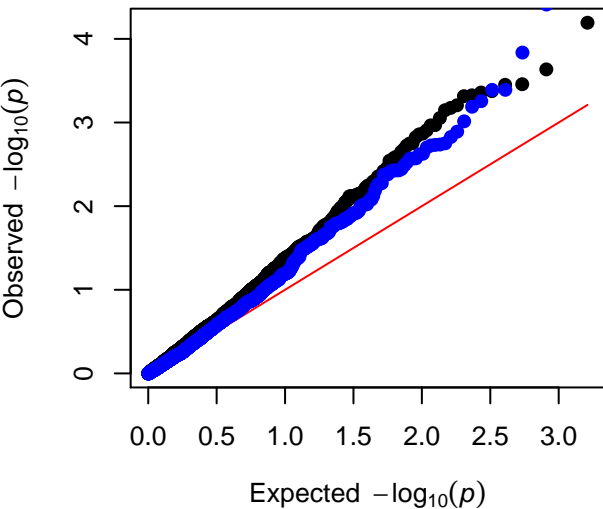

**X184\_Trichome.avg.JA**

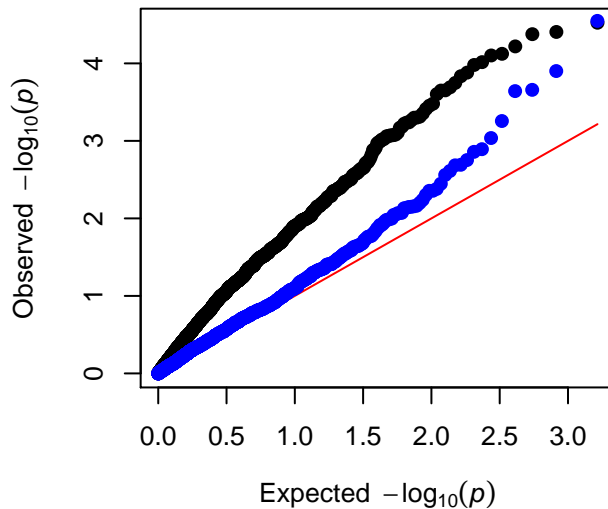

**X186\_Bacterial.titer**

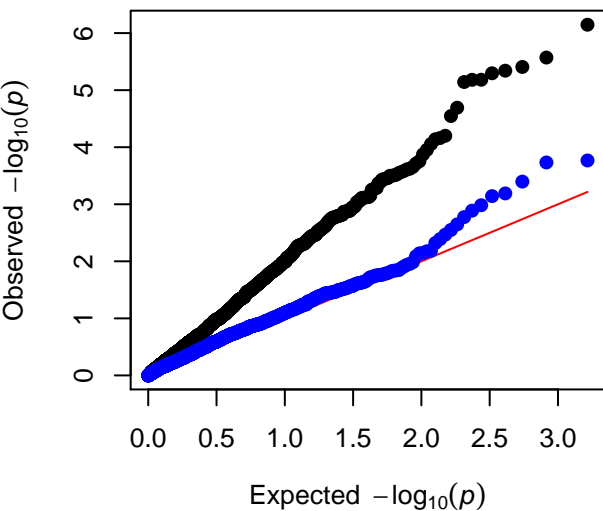

**X272\_Seedling.Growth**

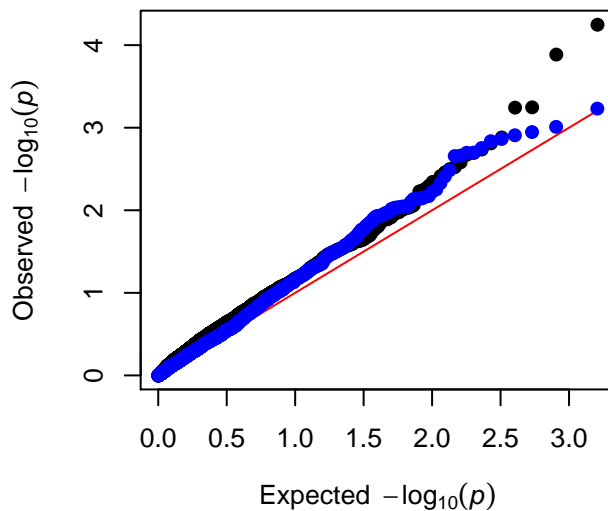

**X273\_Vern.Growth**

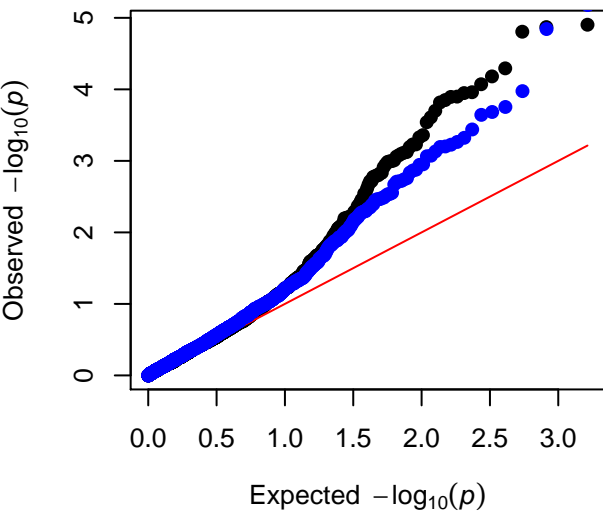

**X274\_After.Vern.Growth**

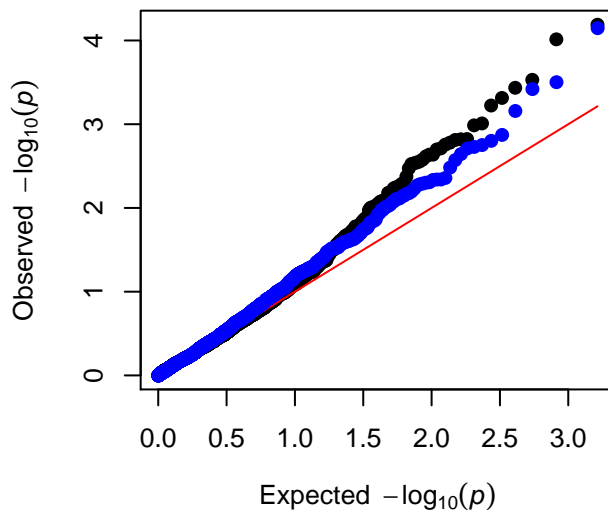

**X277\_Secondary.Dormancy**

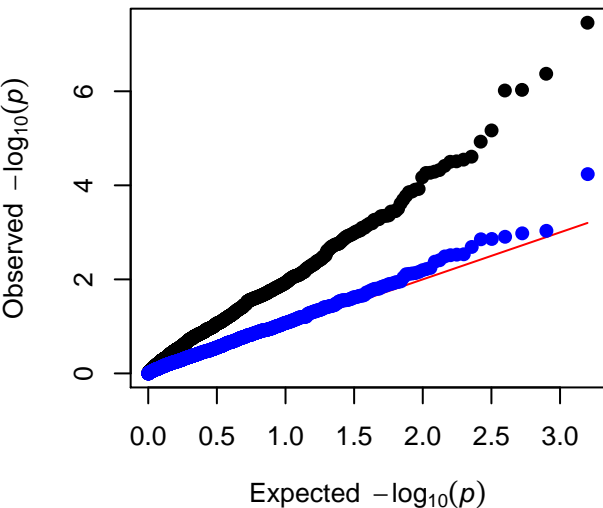

**X278\_Germ.in.dark**

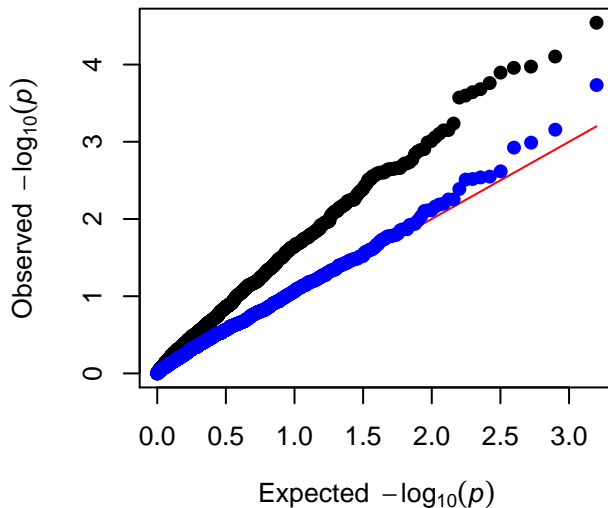

**X279\_DS50**

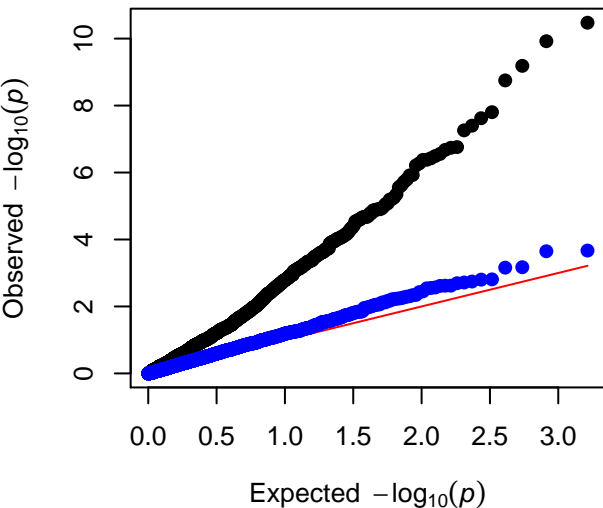

**X281\_Storage.7.days**

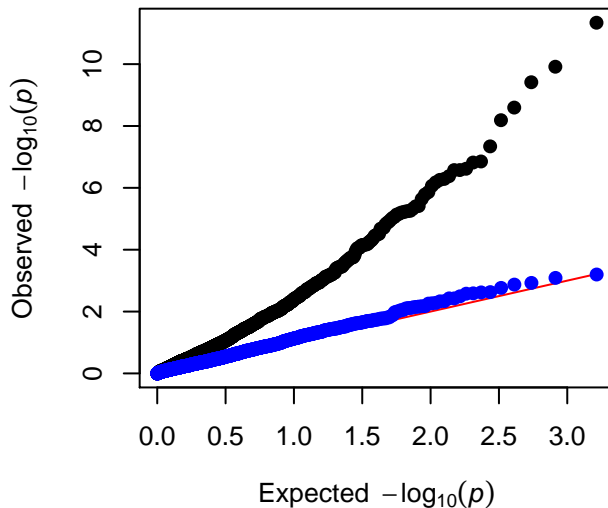

**X282\_Storage.28.days**

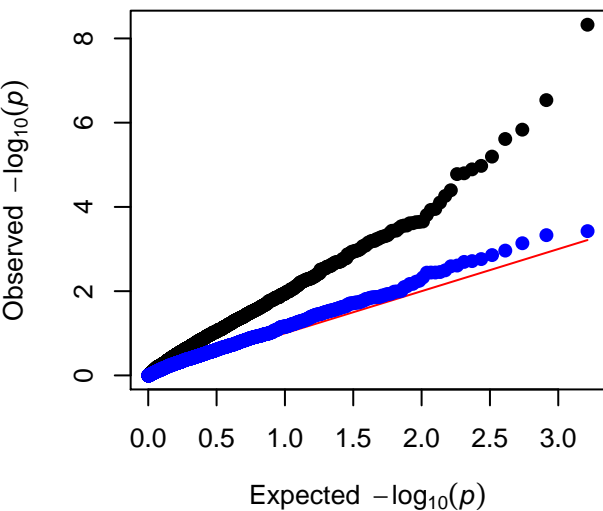

**X283\_Storage.56.days**

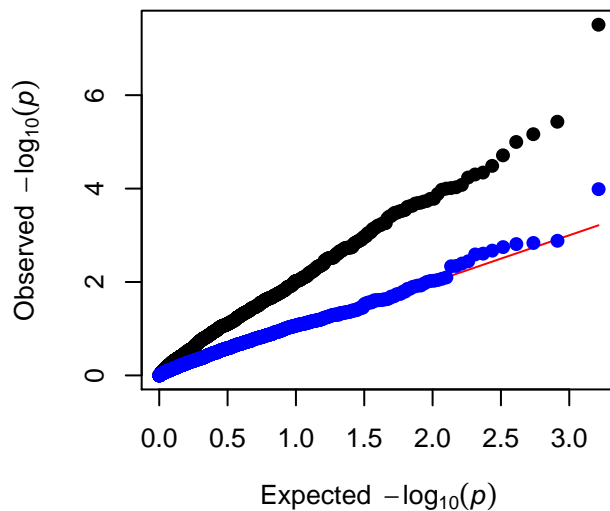

Supplement: Supplemental_File_S4.zip [file qqplot_mma_w_permuted_032017.pdf › Ath_STRs/output/qqplot_mma_w_permuted_032017.pdf]
