# Supplementary material for: Massive variation of short tandem repeats with functional consequences across strains of Arabidopsis thaliana
Source: HighWire-hosted journal article supplement (doi:10.1101/gr.231753.117), 2018-07-03

# LMM, X1\_LD

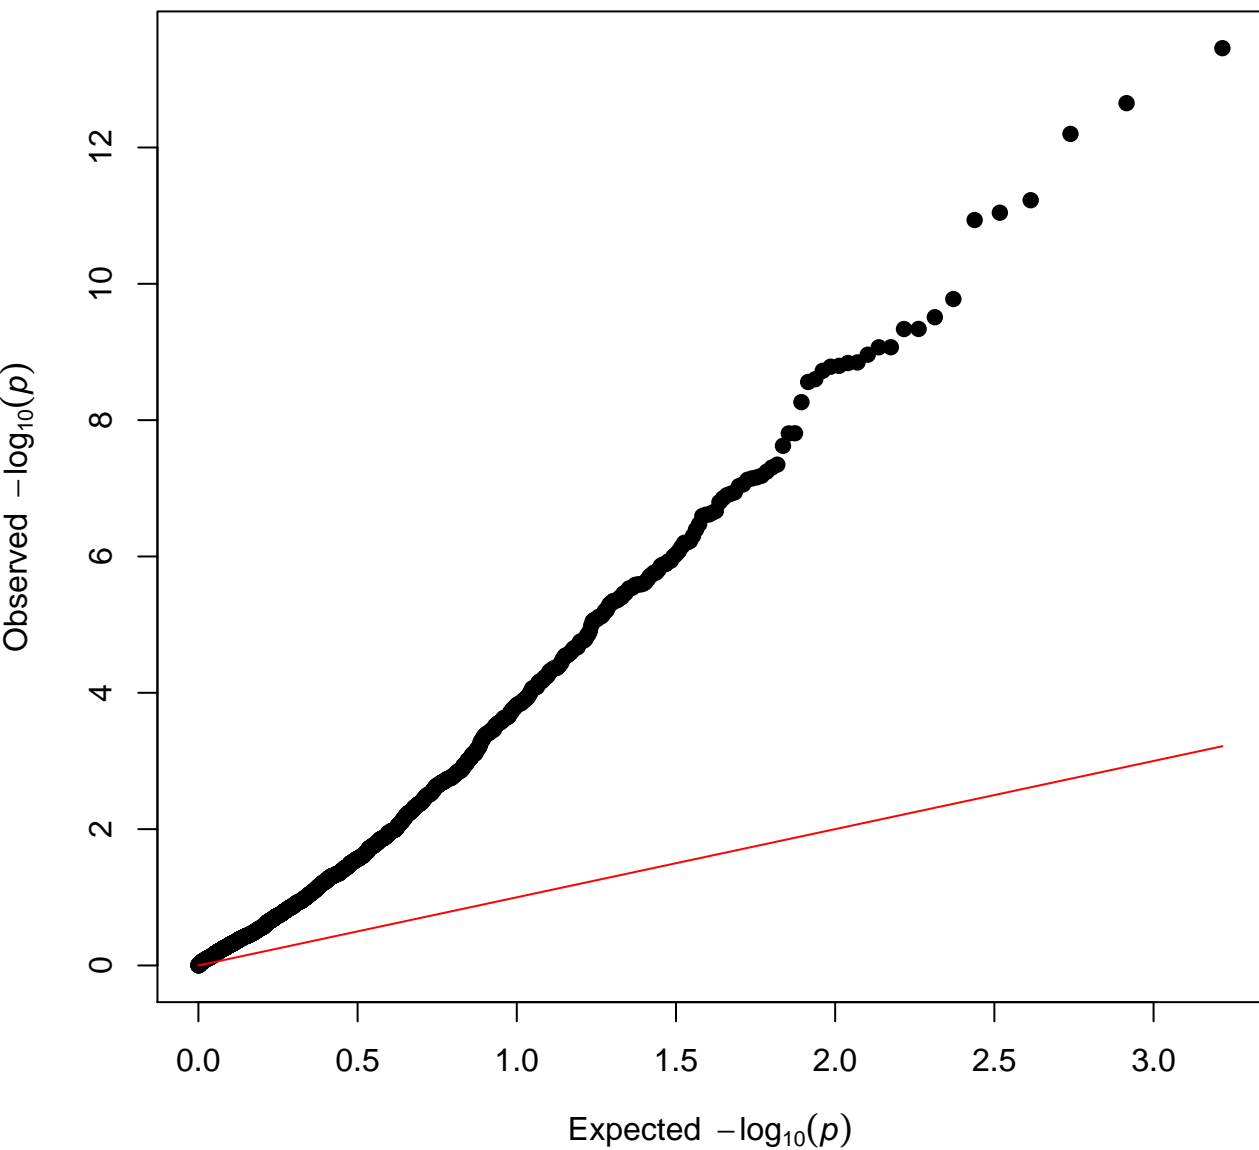

# LMM, X2\_LDV

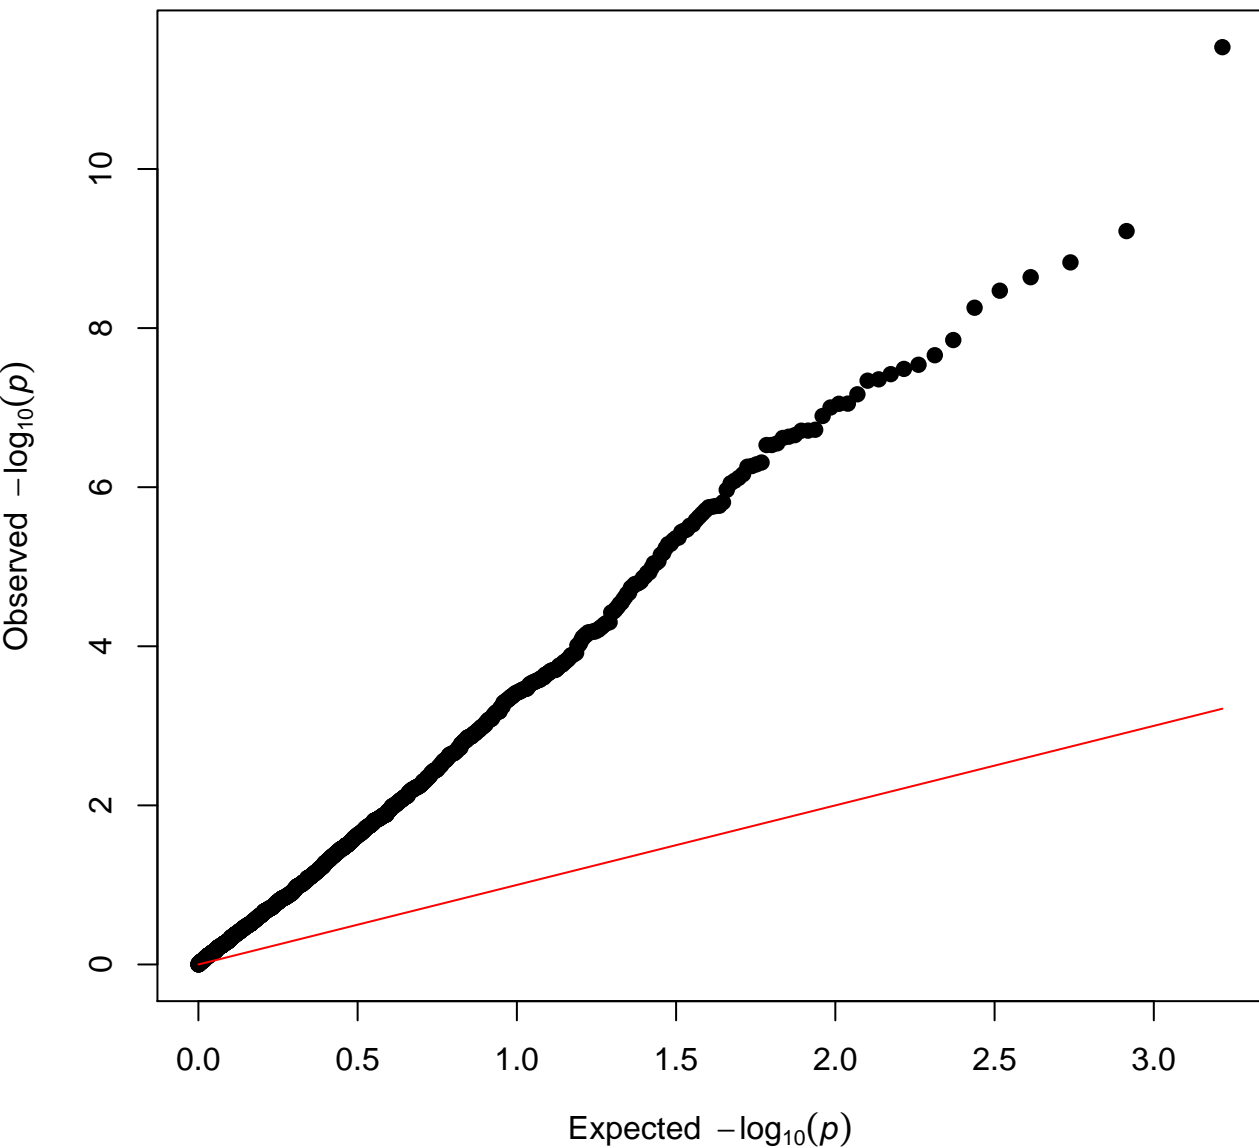

# LMM, X3\_SD

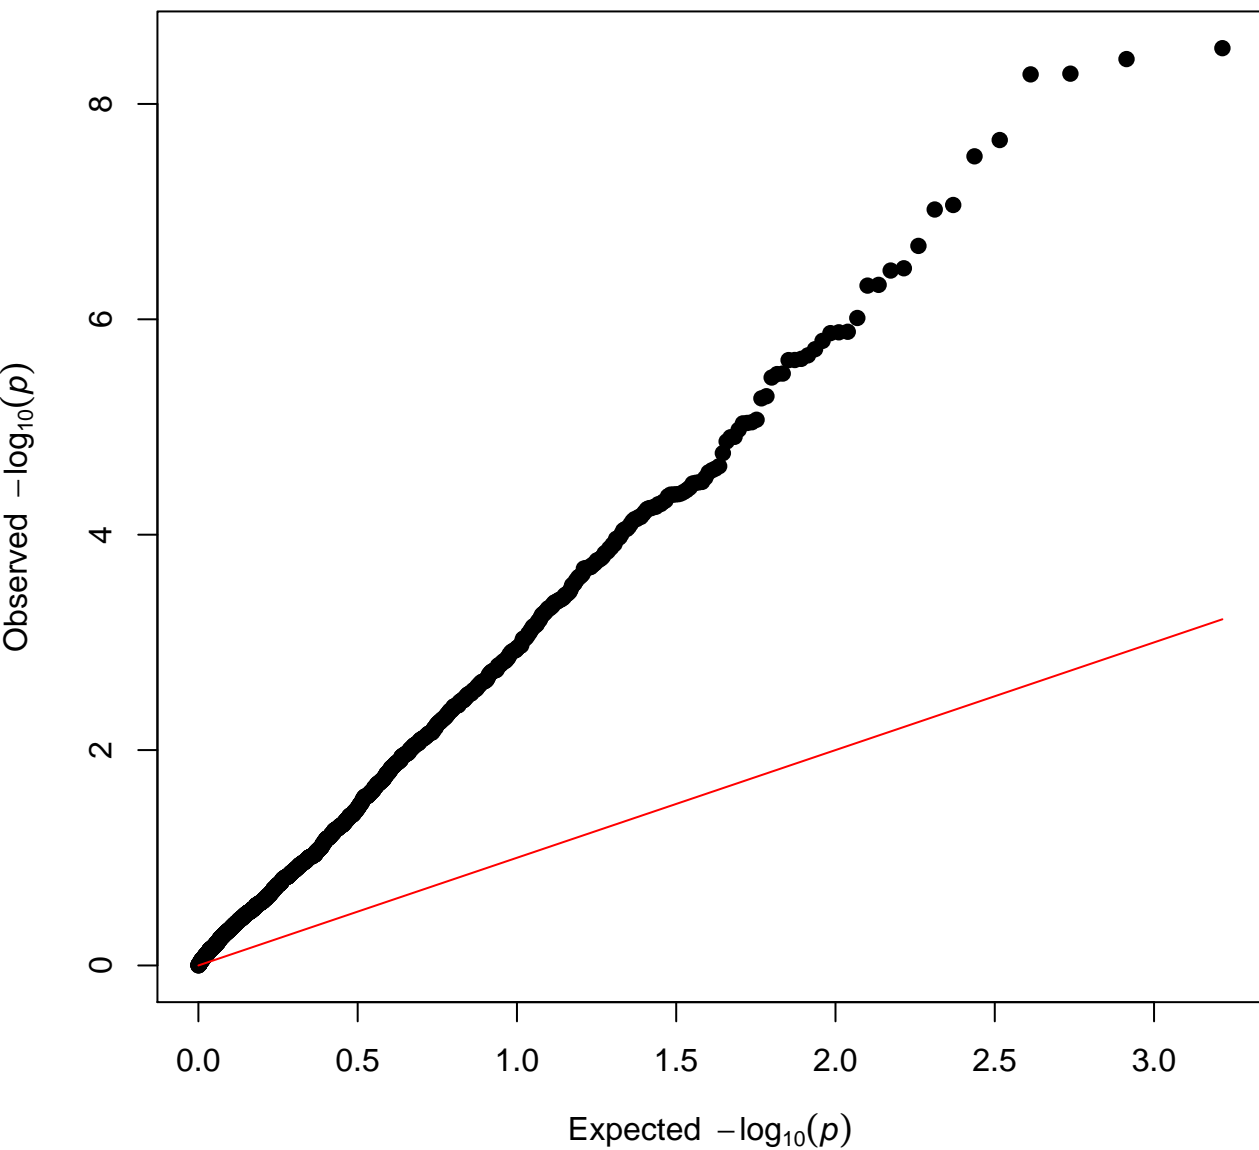

LMM, X4\_SDV

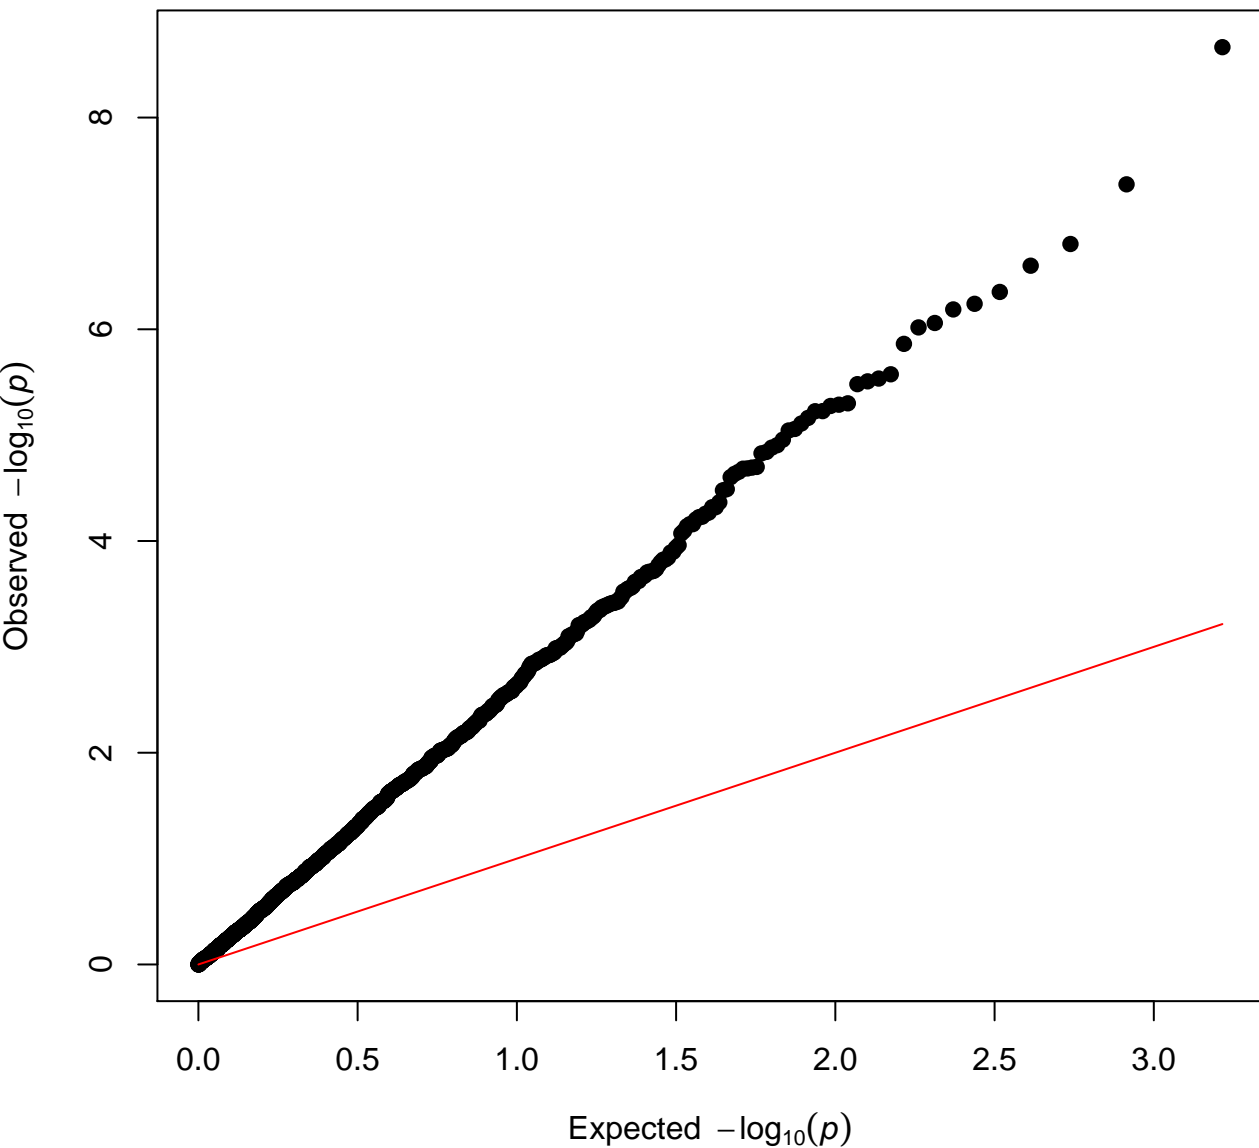

# LMM, X5\_FT10

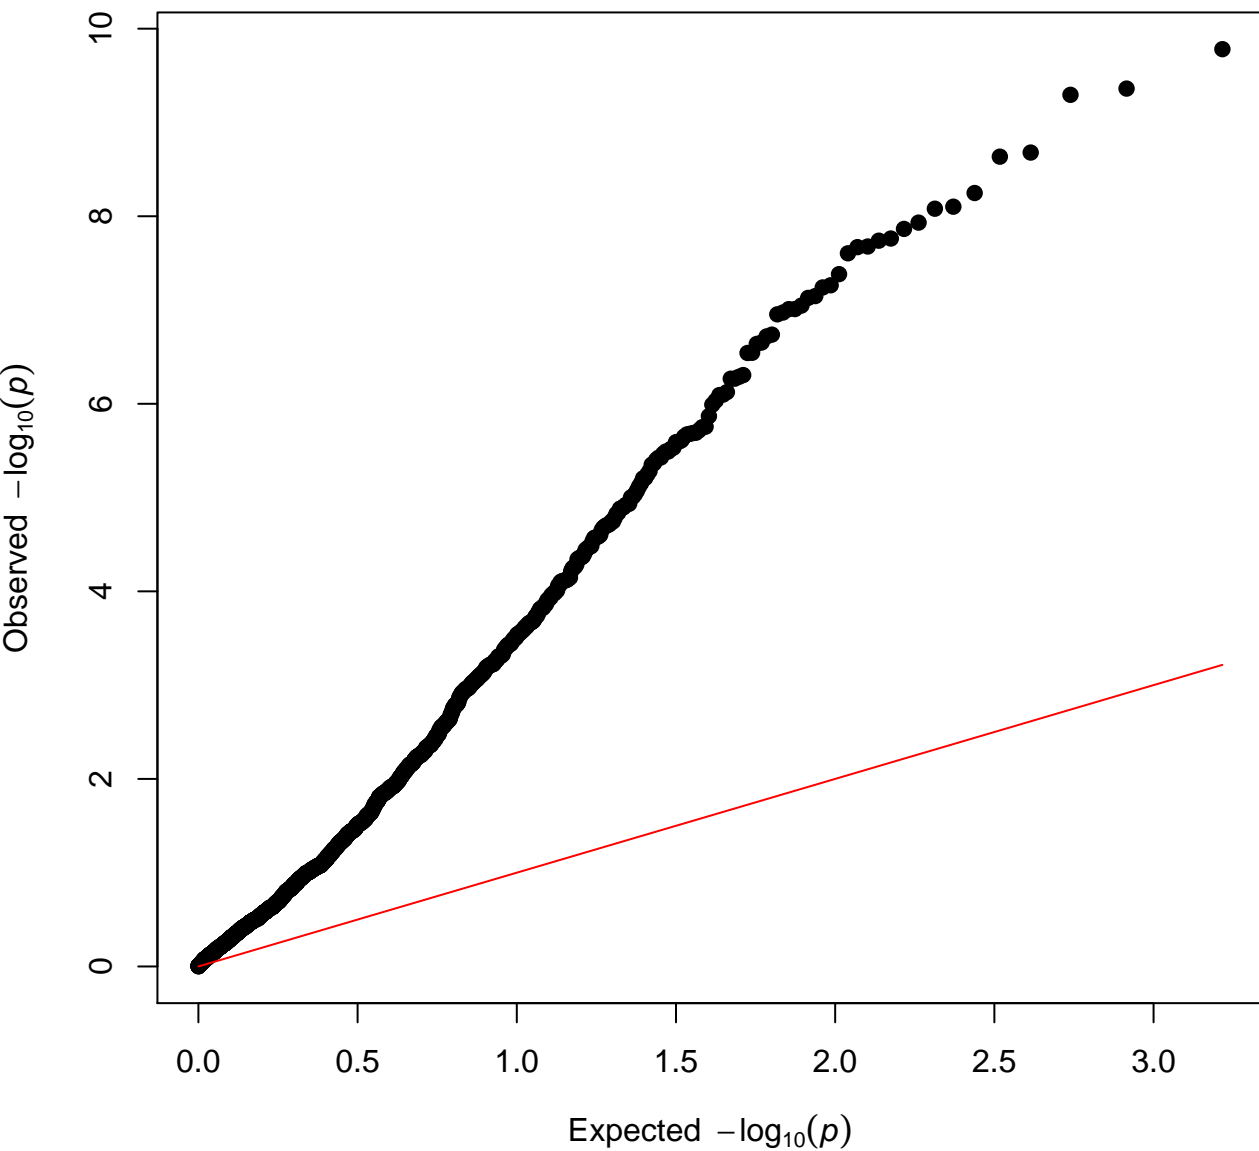

LMM, X6\_FT16

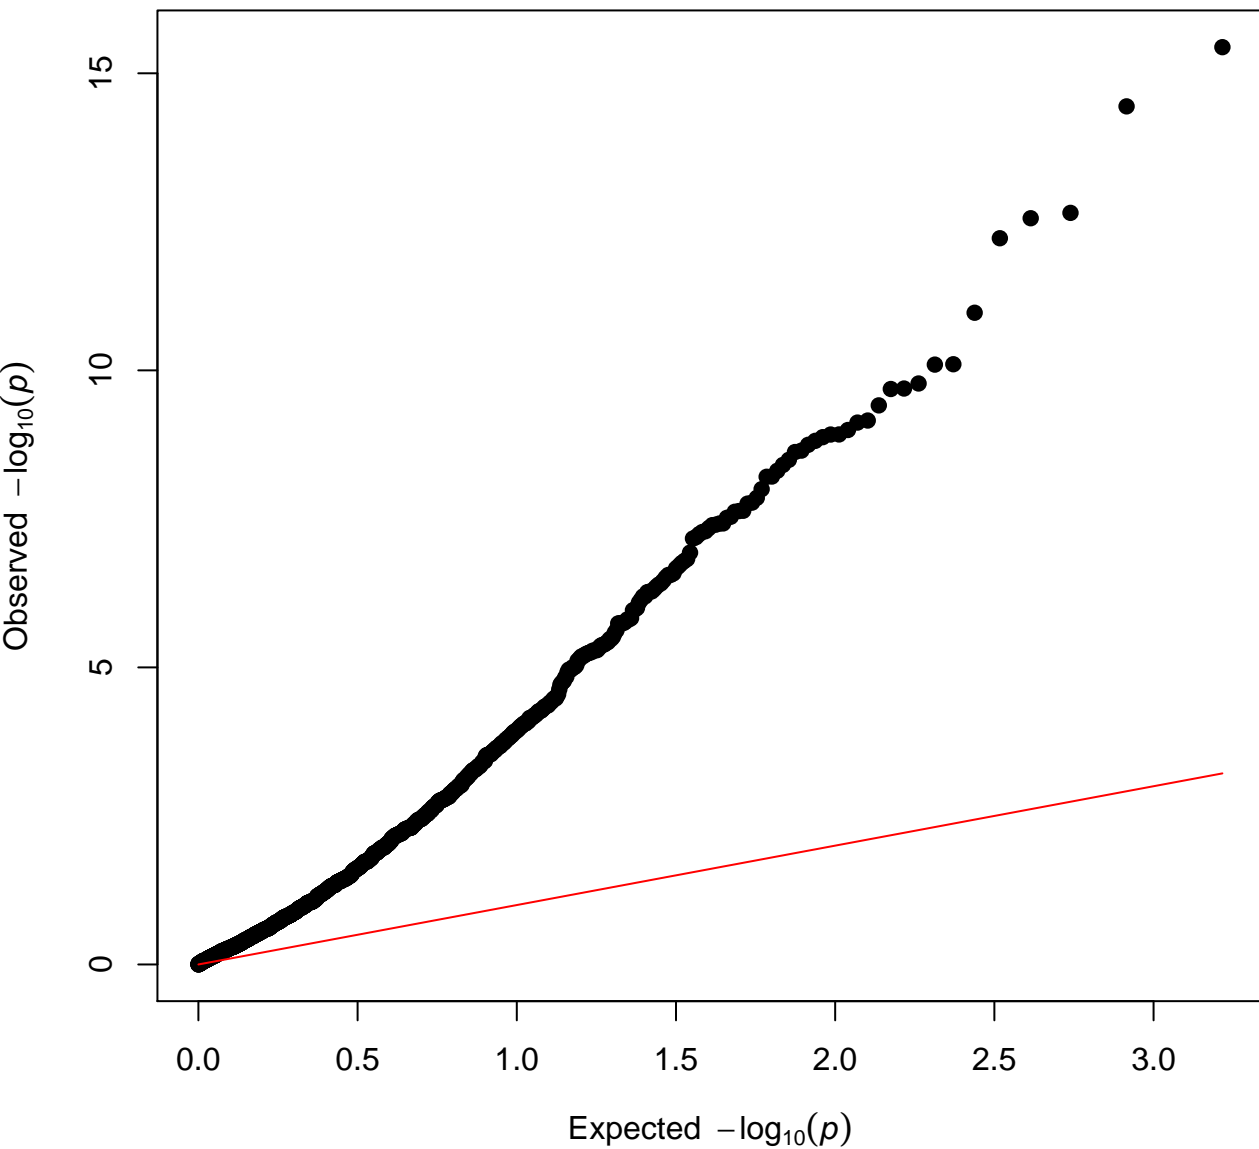

# LMM, X7\_FT22

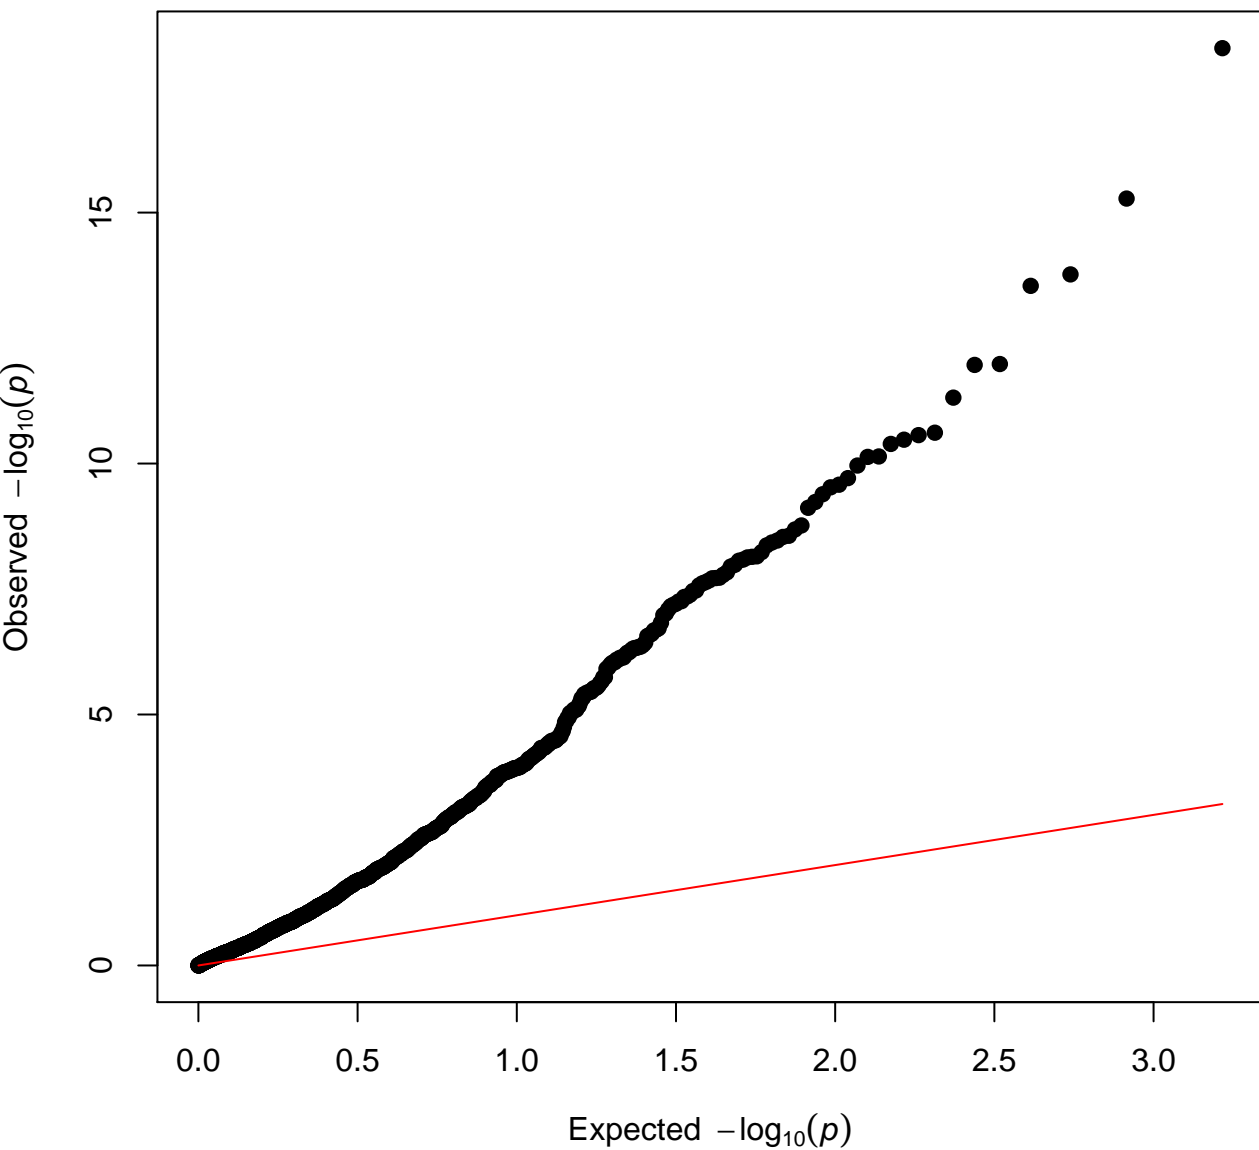

# LMM, X8\_Seed.Dormancy

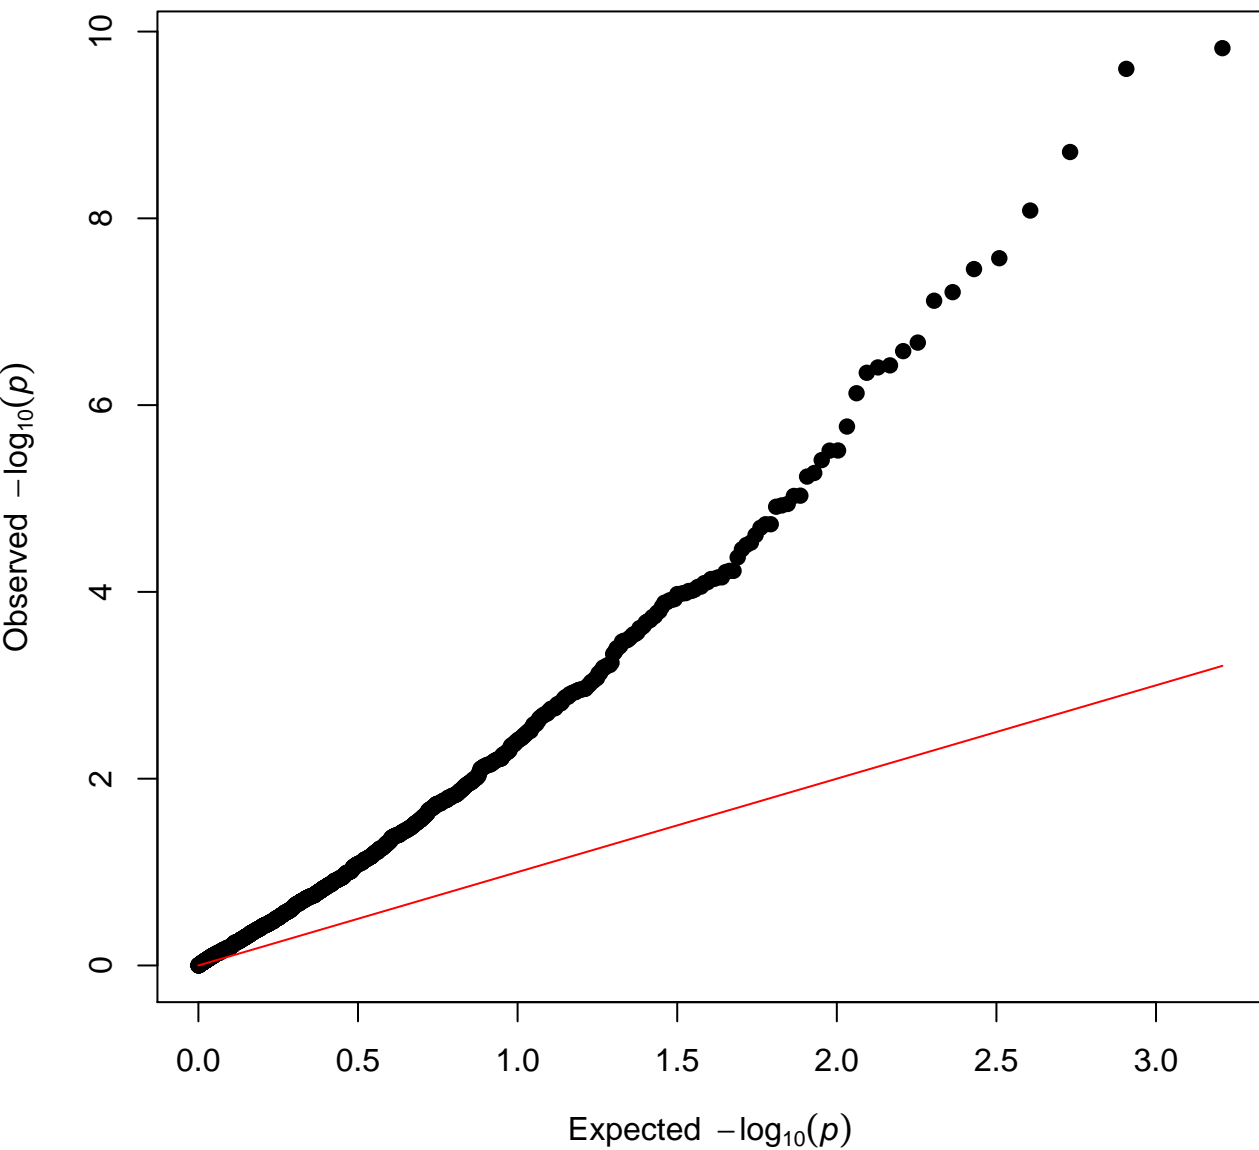



# LMM, X9\_Emco5

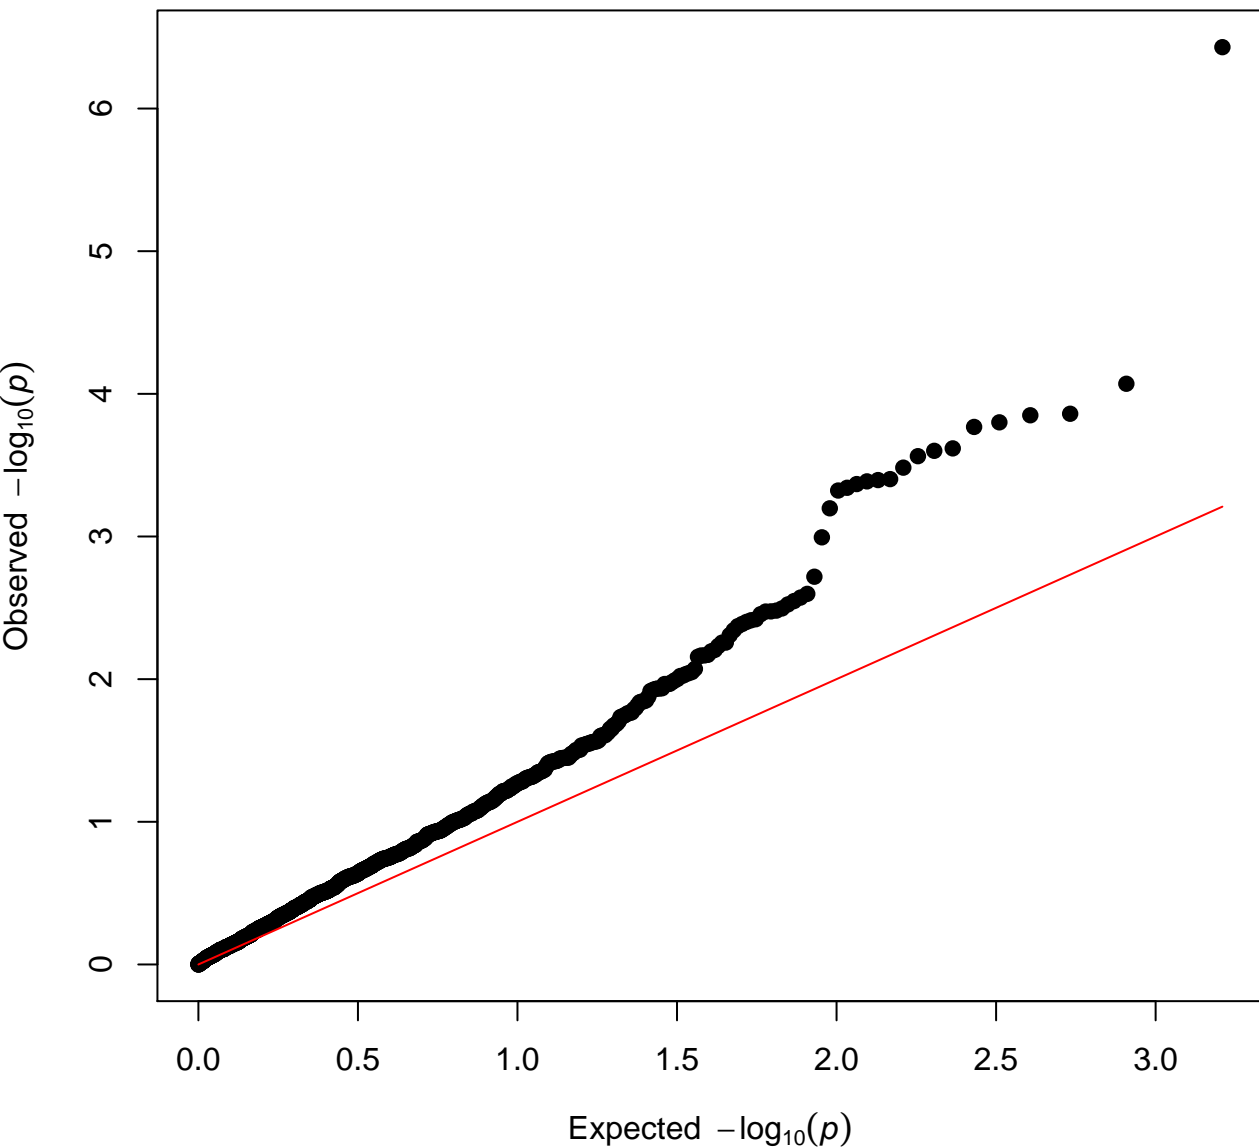

# LMM, X10\_Emwa1

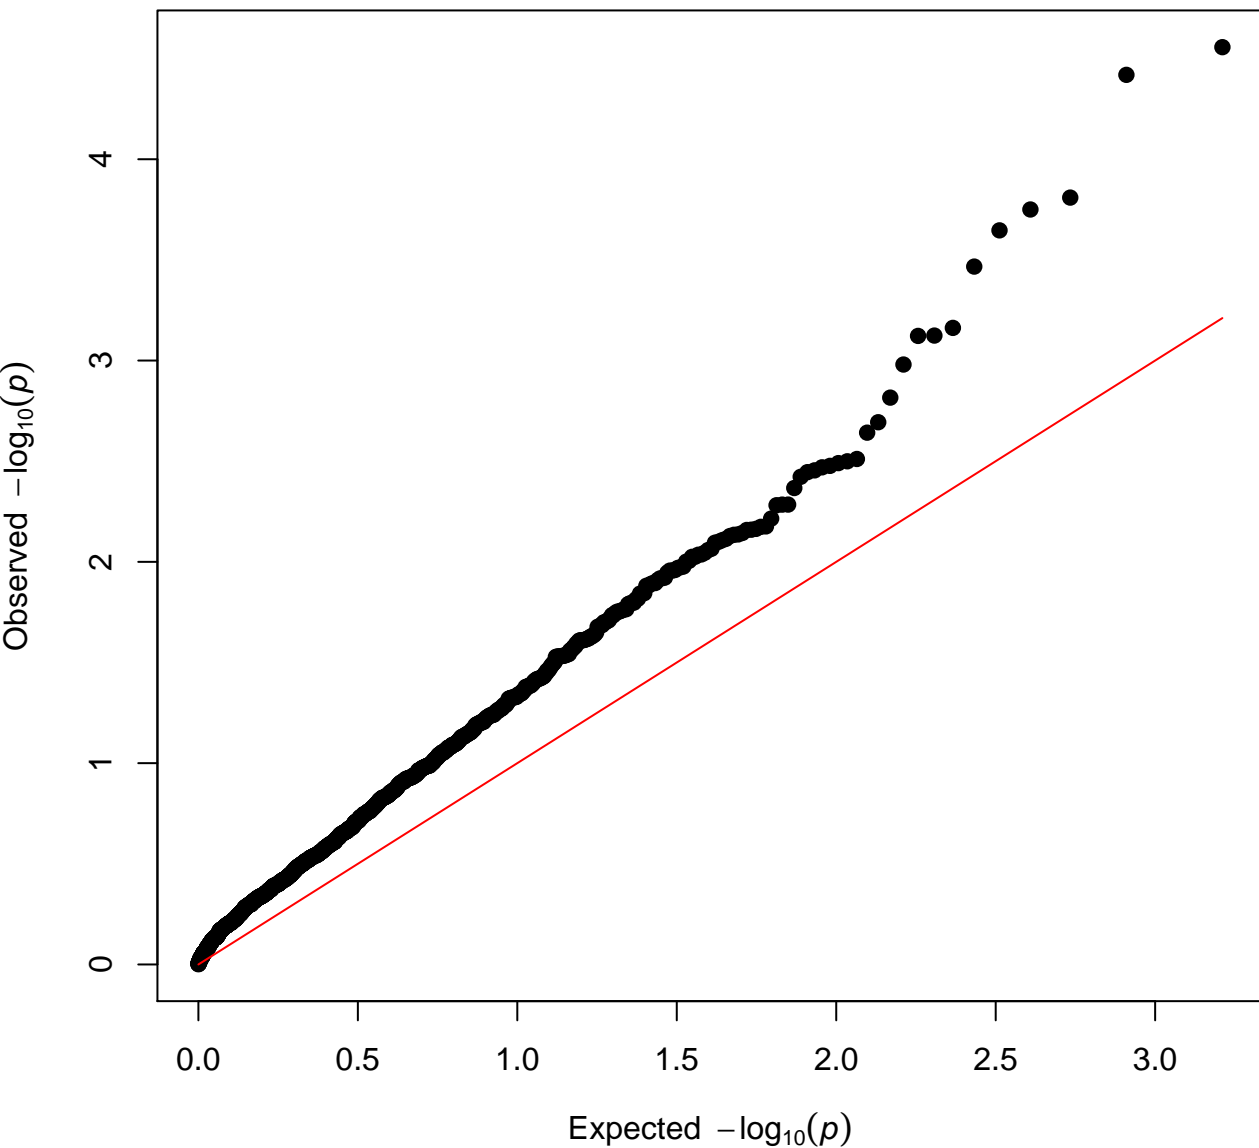

# LMM, X11\_Emoy.

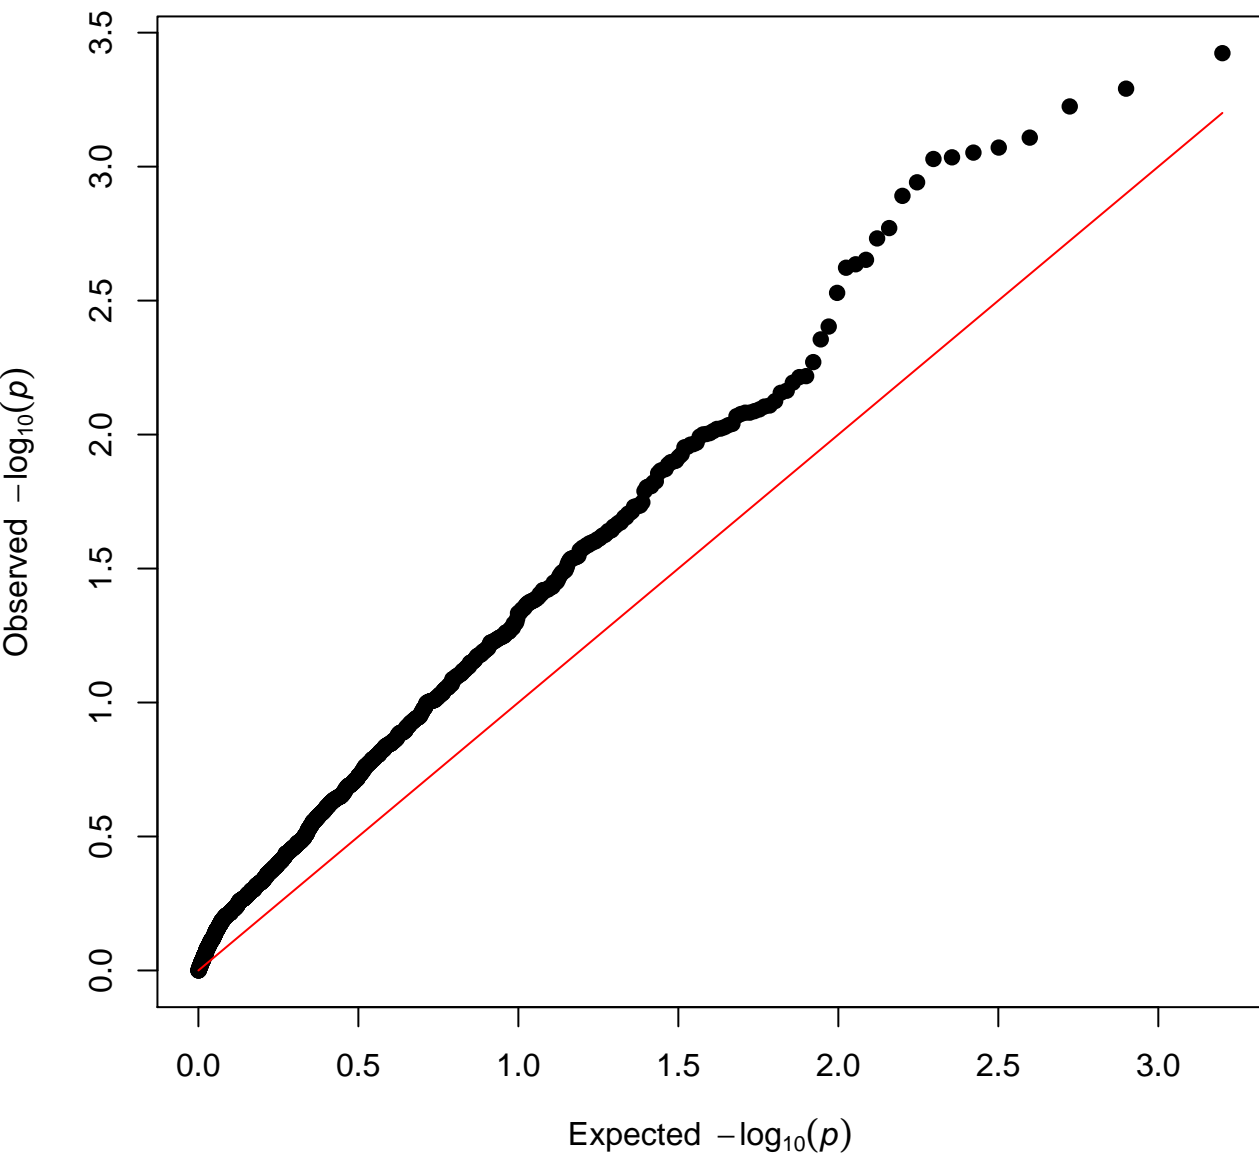

# LMM, X12\_Hiks1

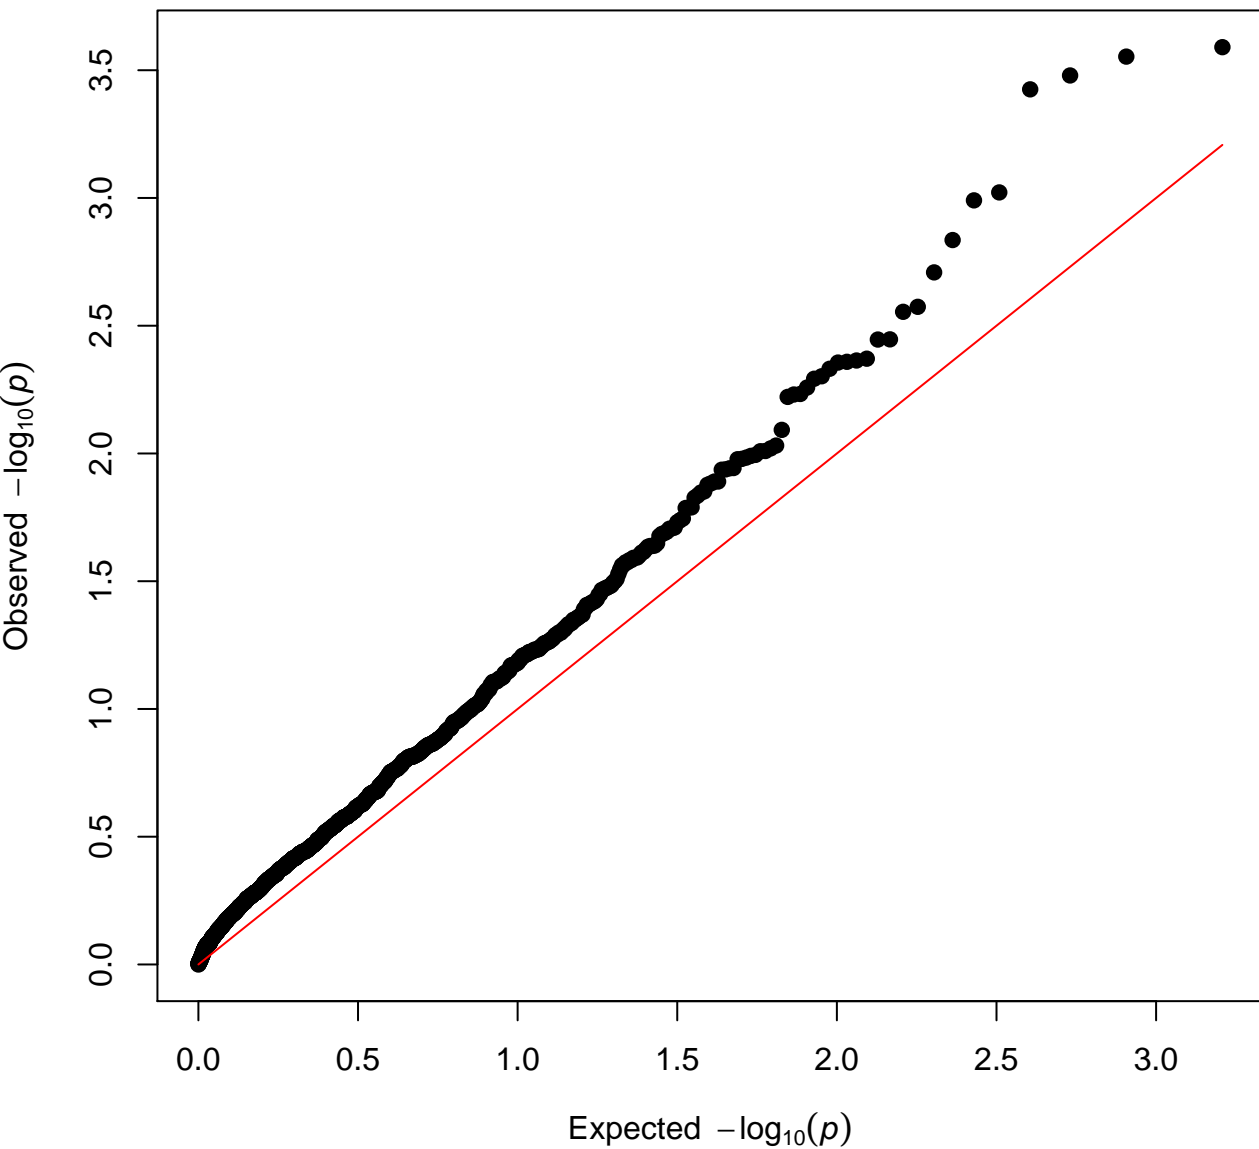

# LMM, X13\_Noco2

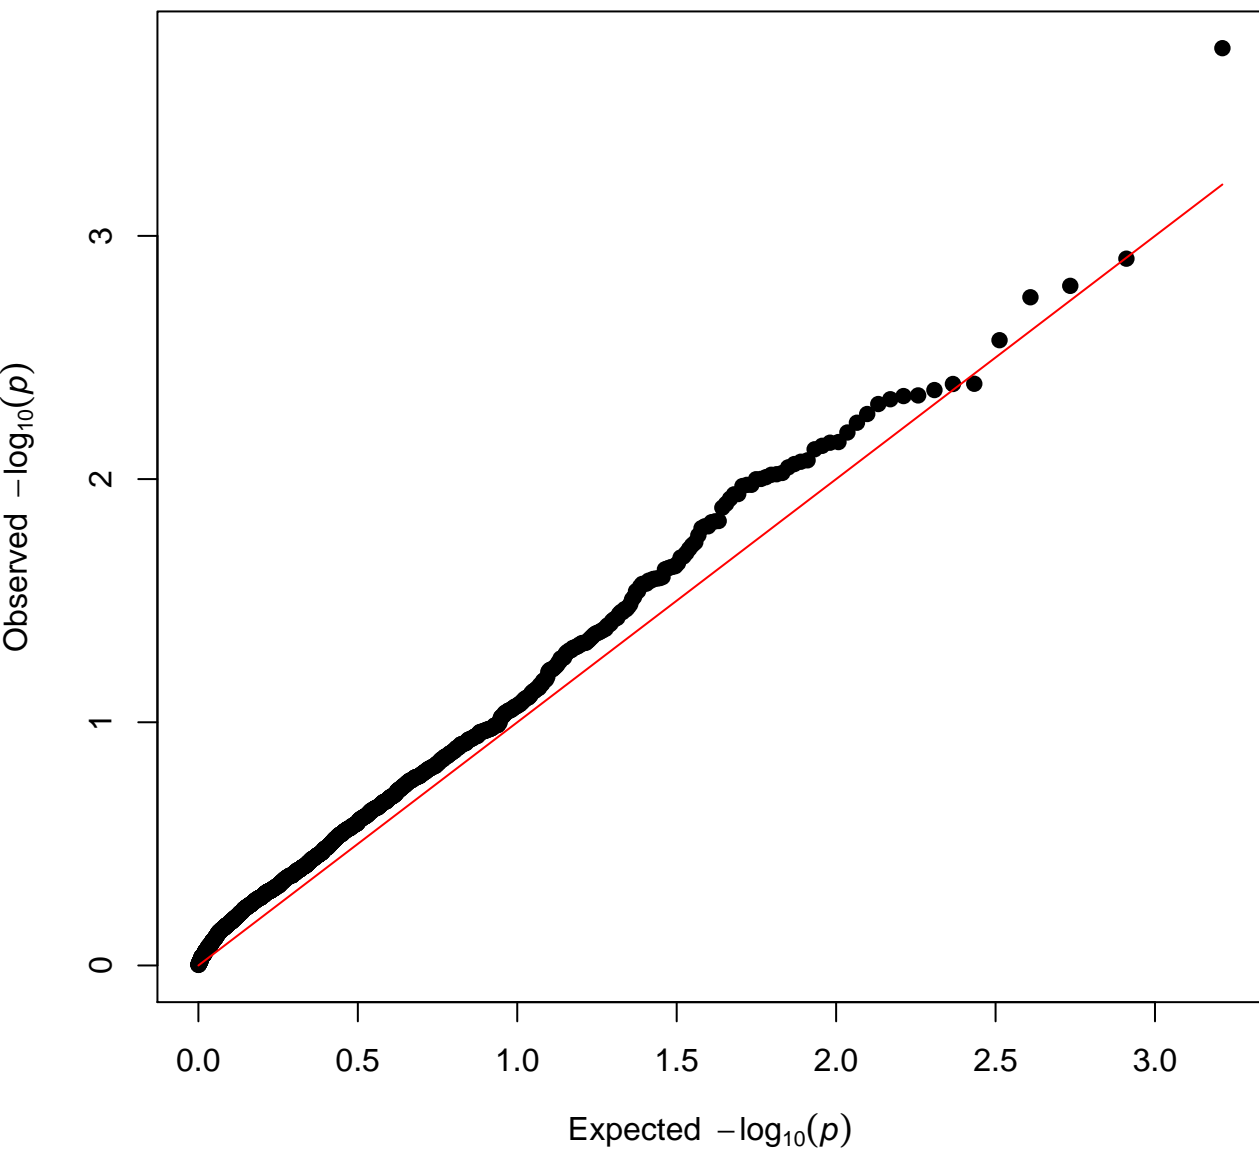

# LMM, X14\_Li7

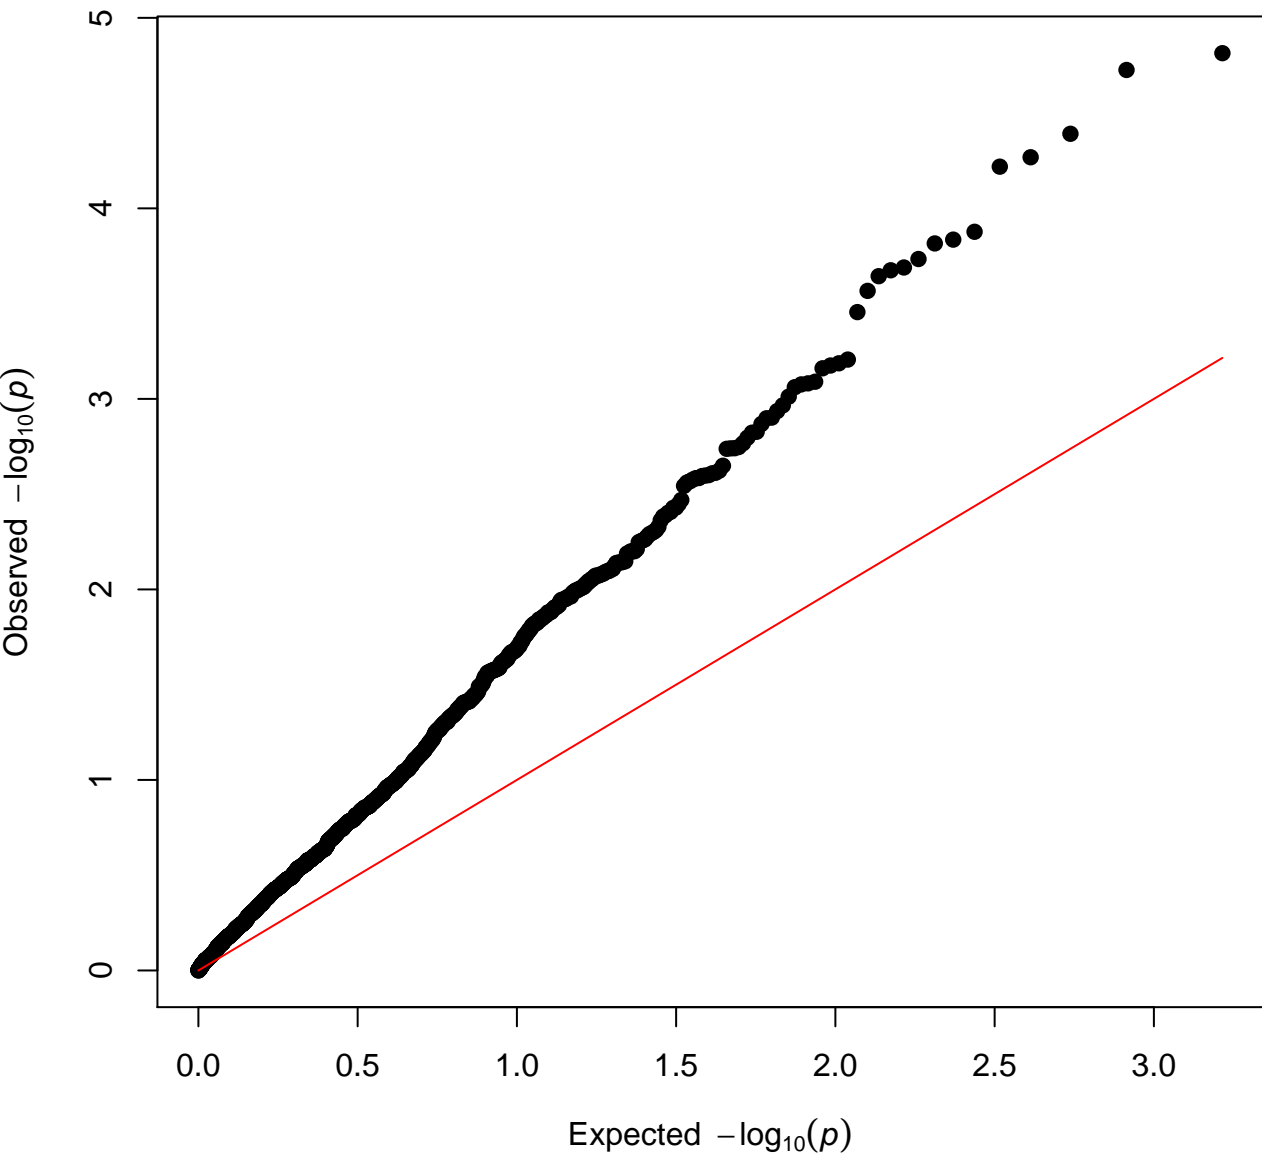

# LMM, X15\_B11

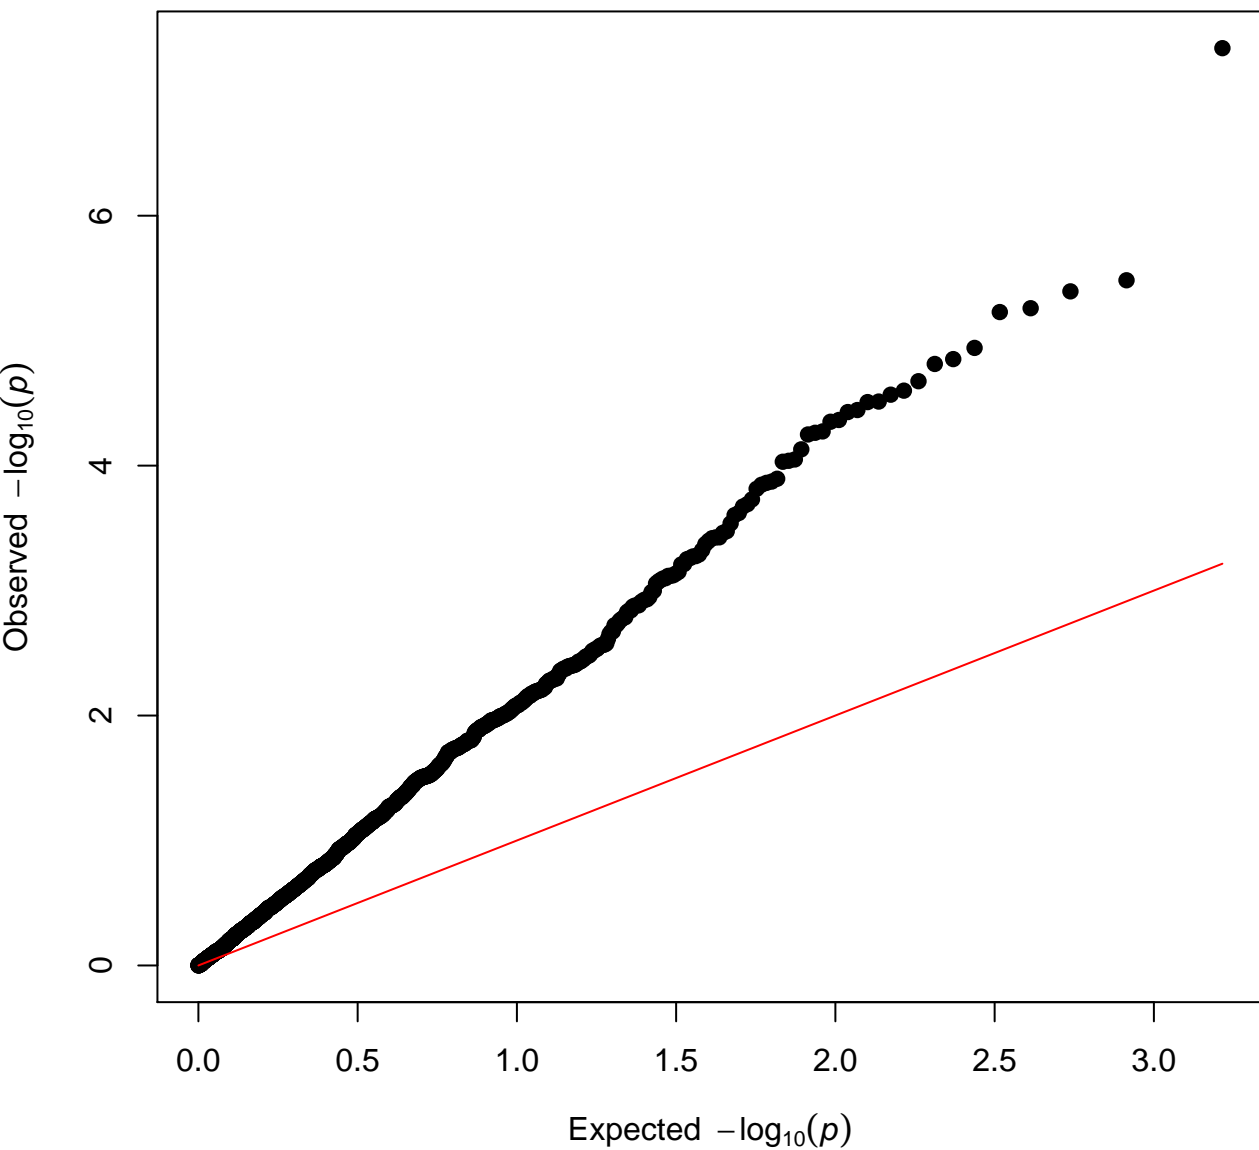

# LMM, X16\_Na23

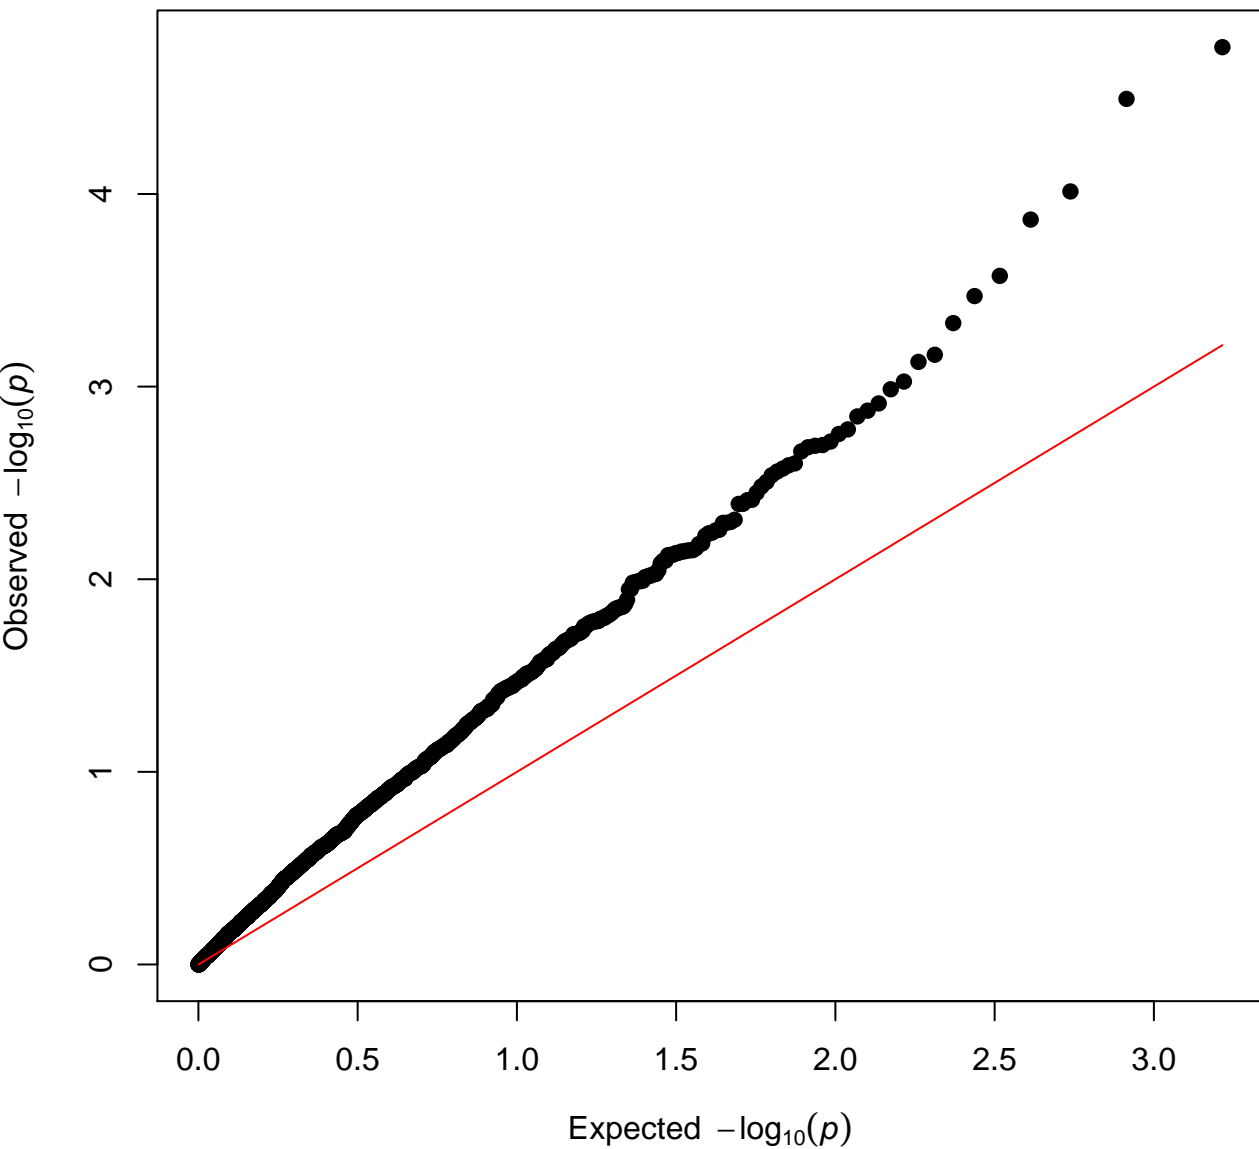



# LMM, X17\_Mg25

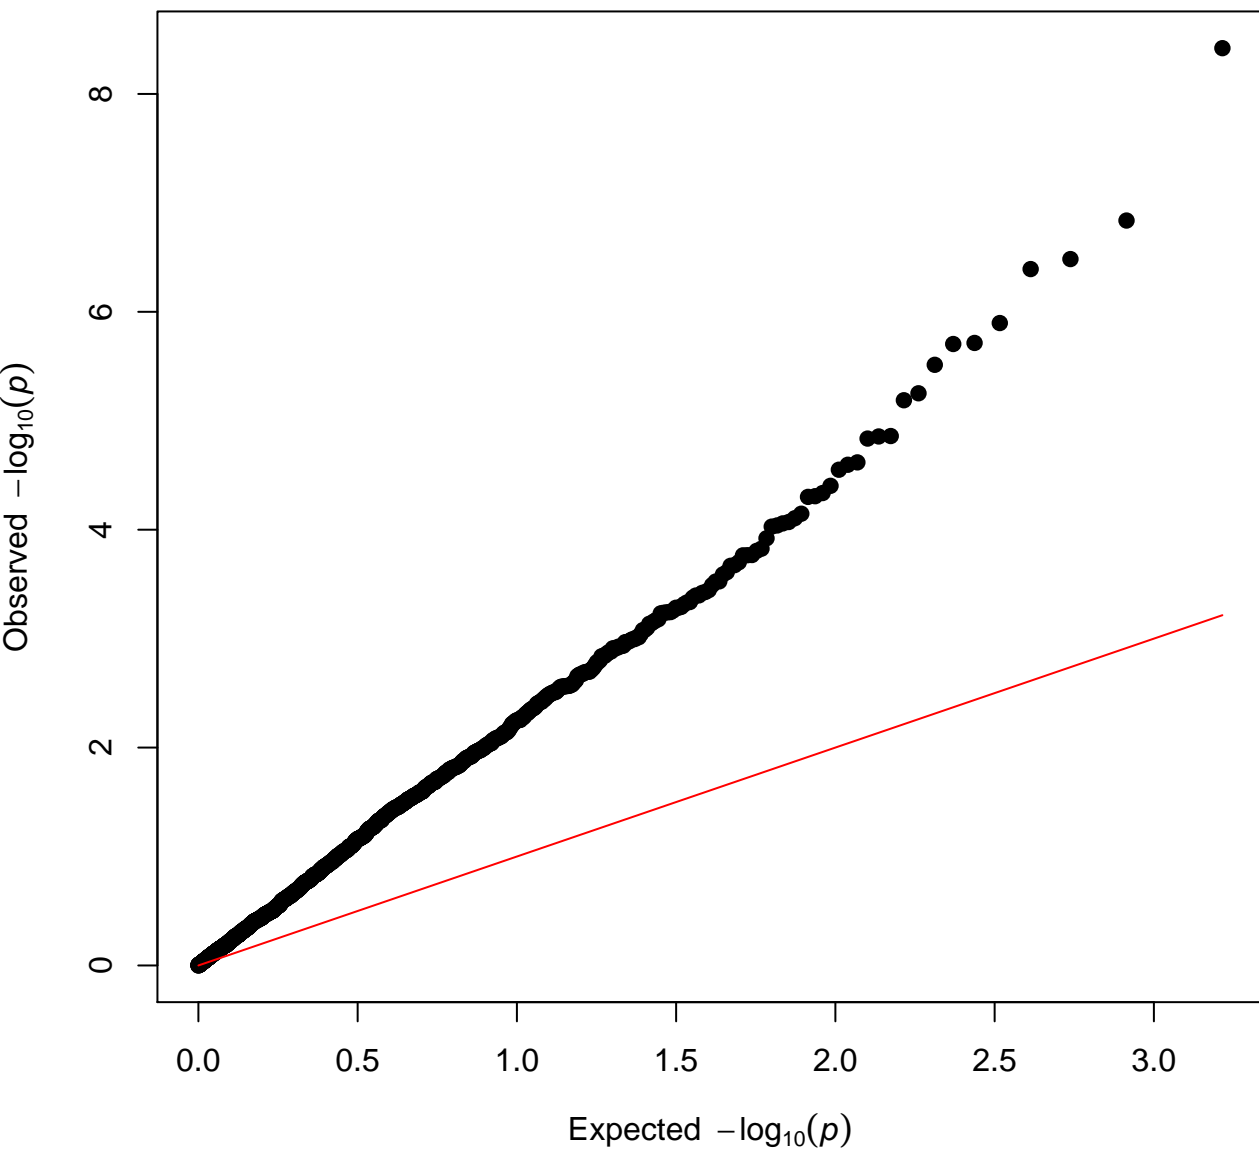

# LMM, X18\_P31

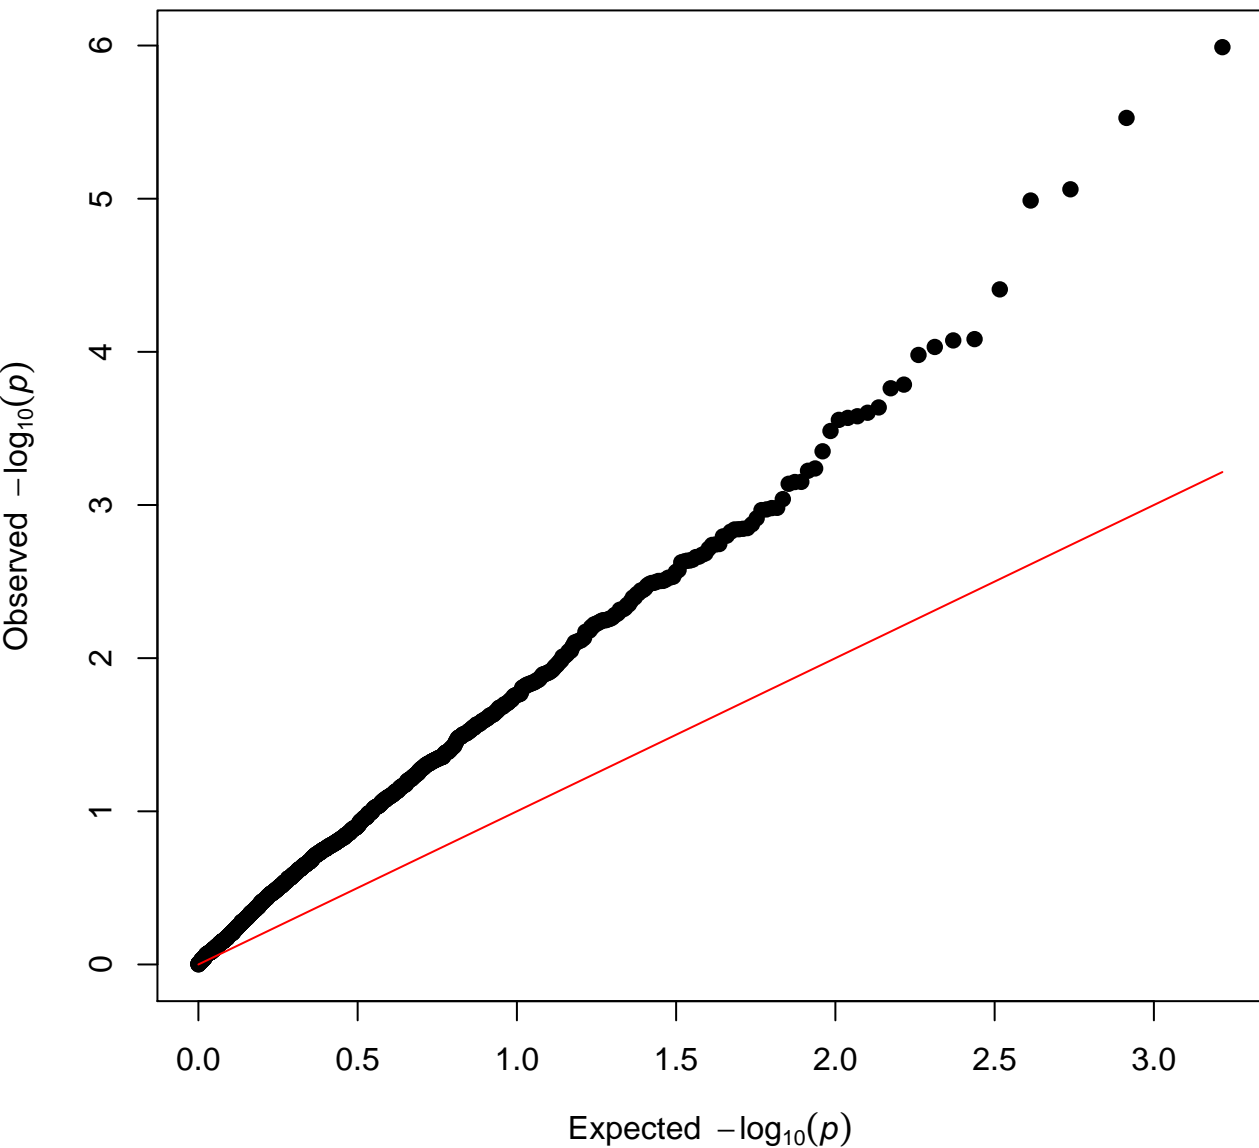

# LMM, X19\_S34

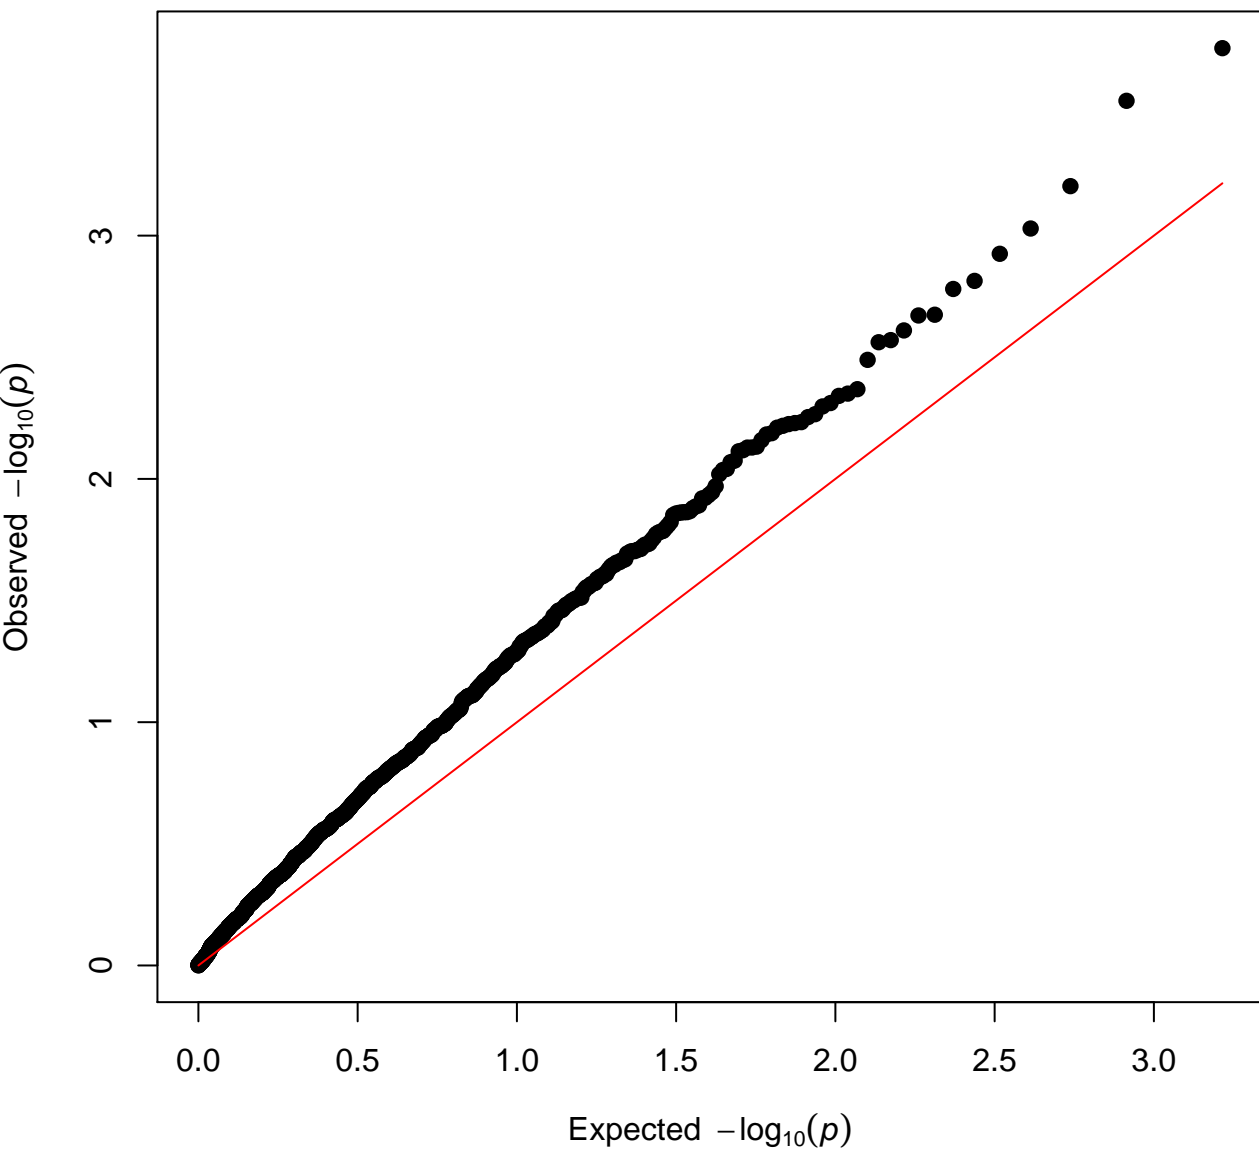

# LMM, X20\_K39

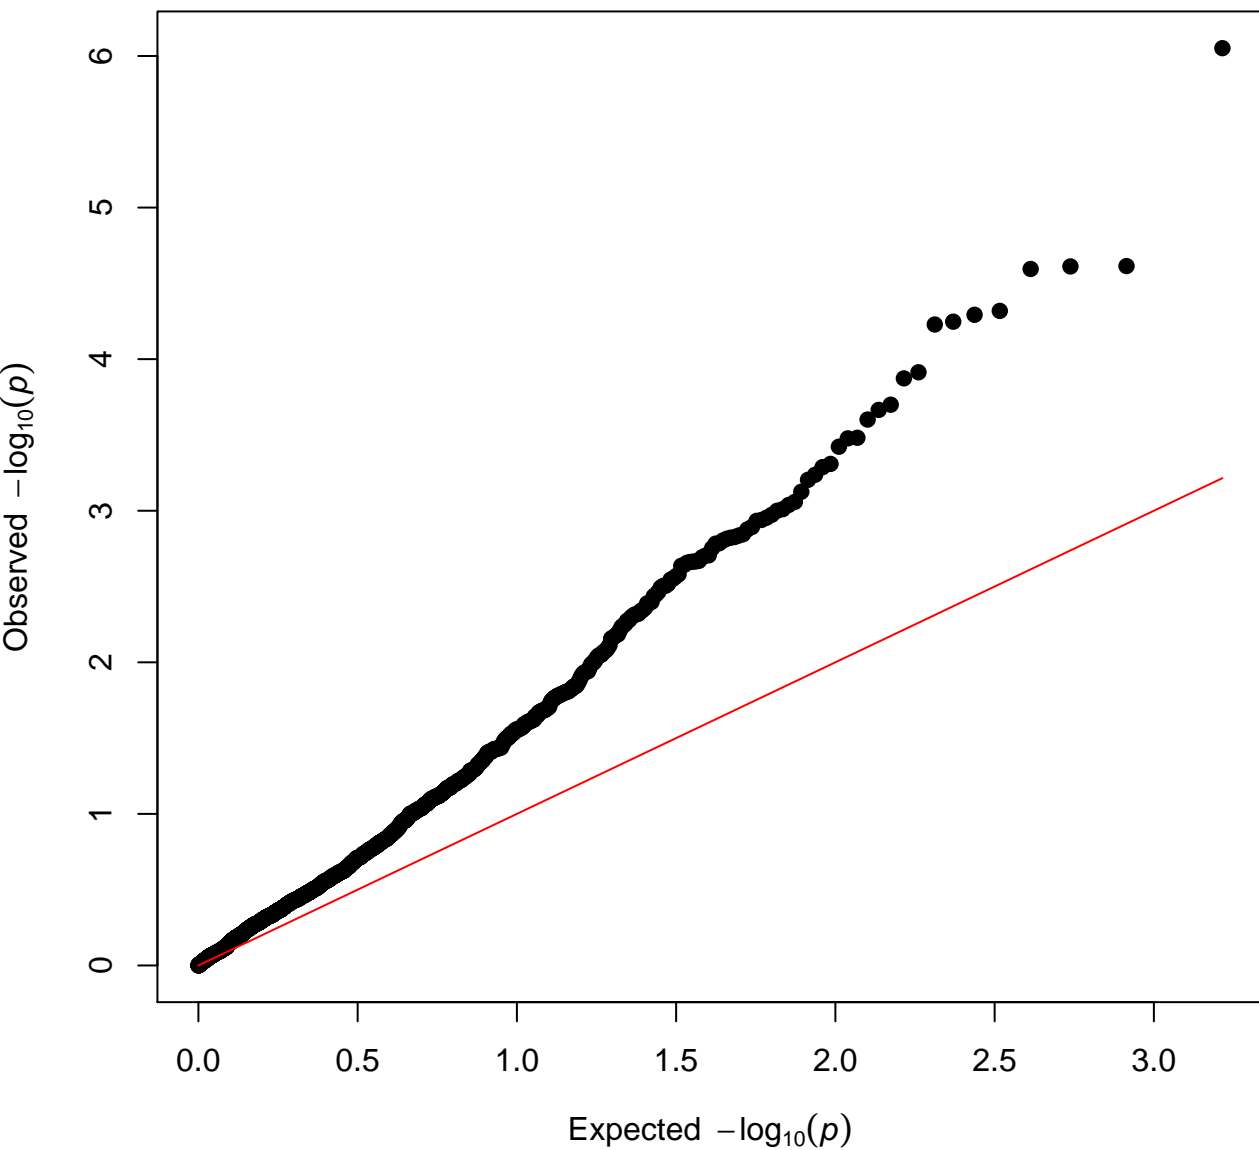

# LMM, X21\_Ca43

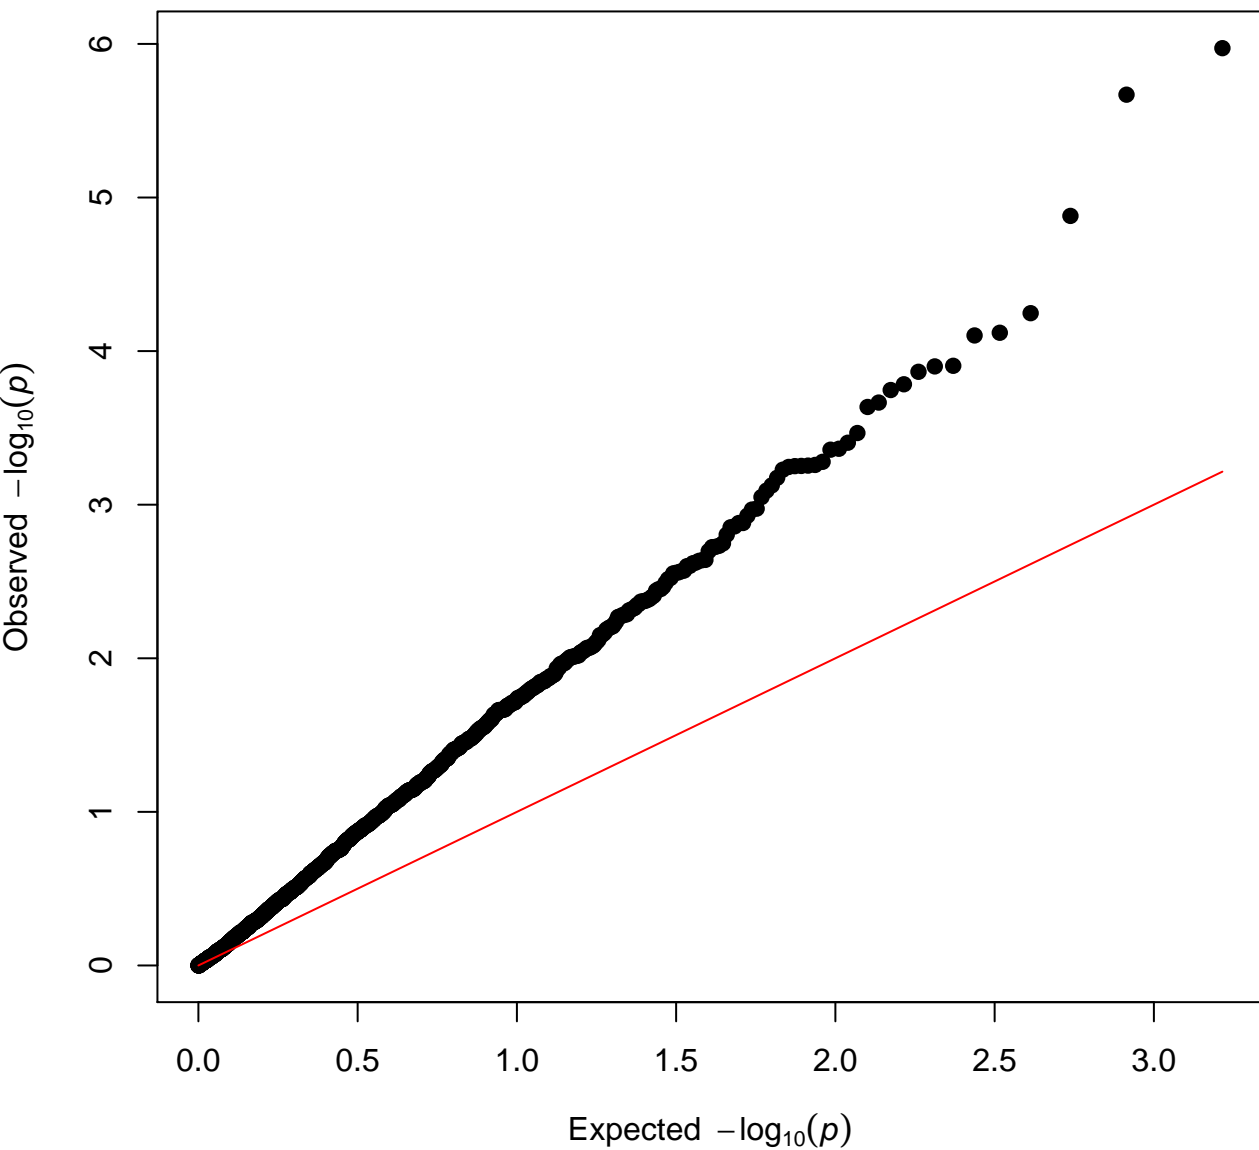

# LMM, X22\_Mn55

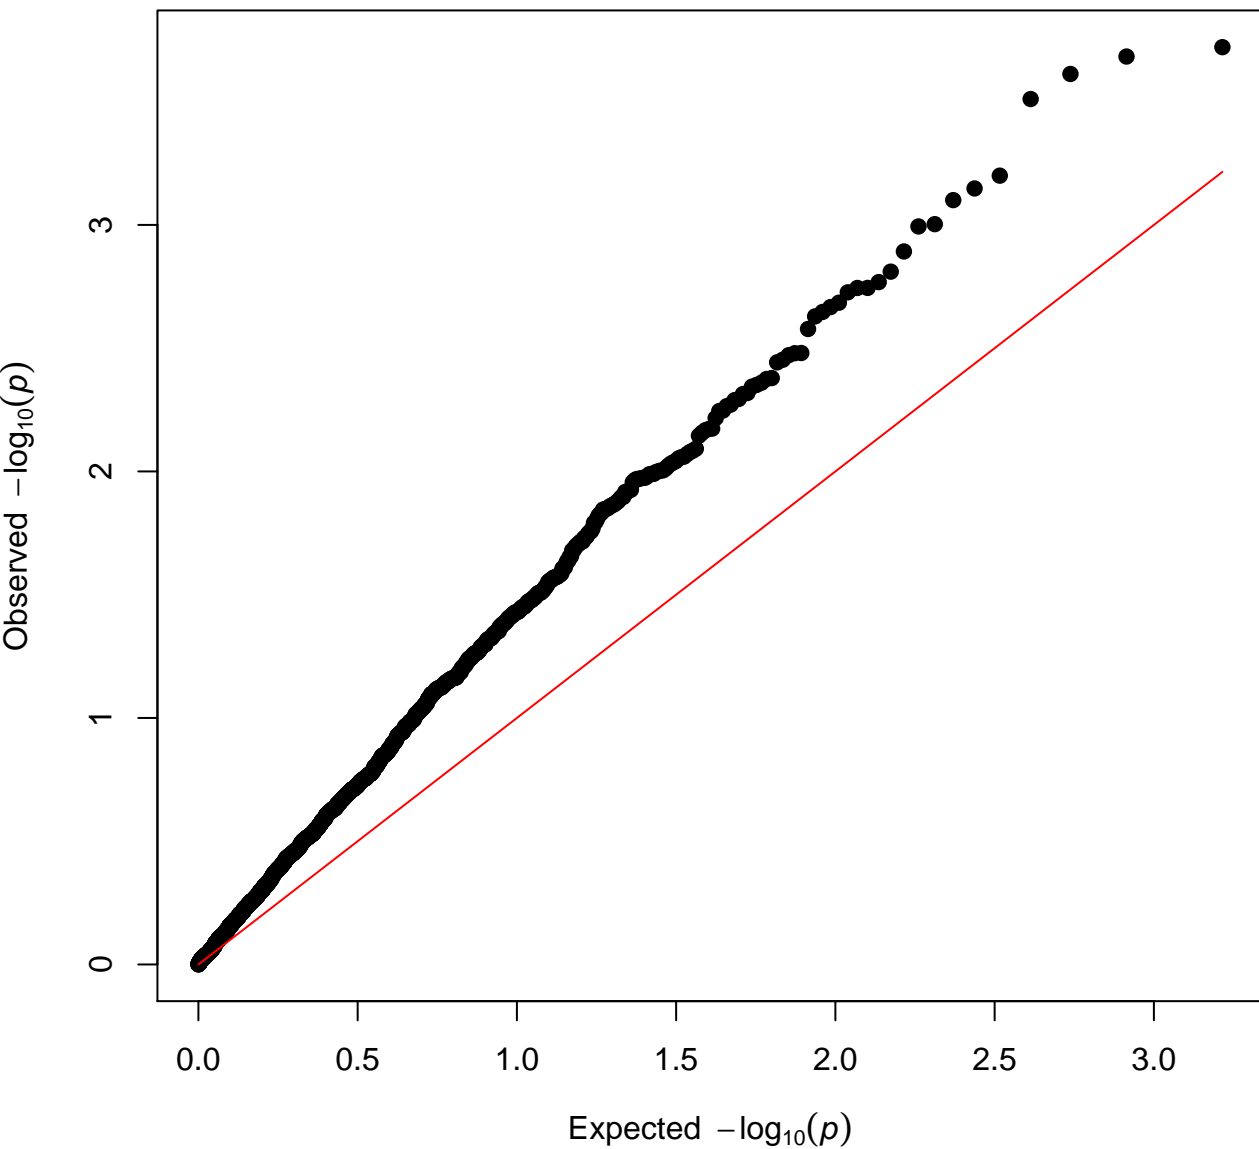

# LMM, X23\_Fe56

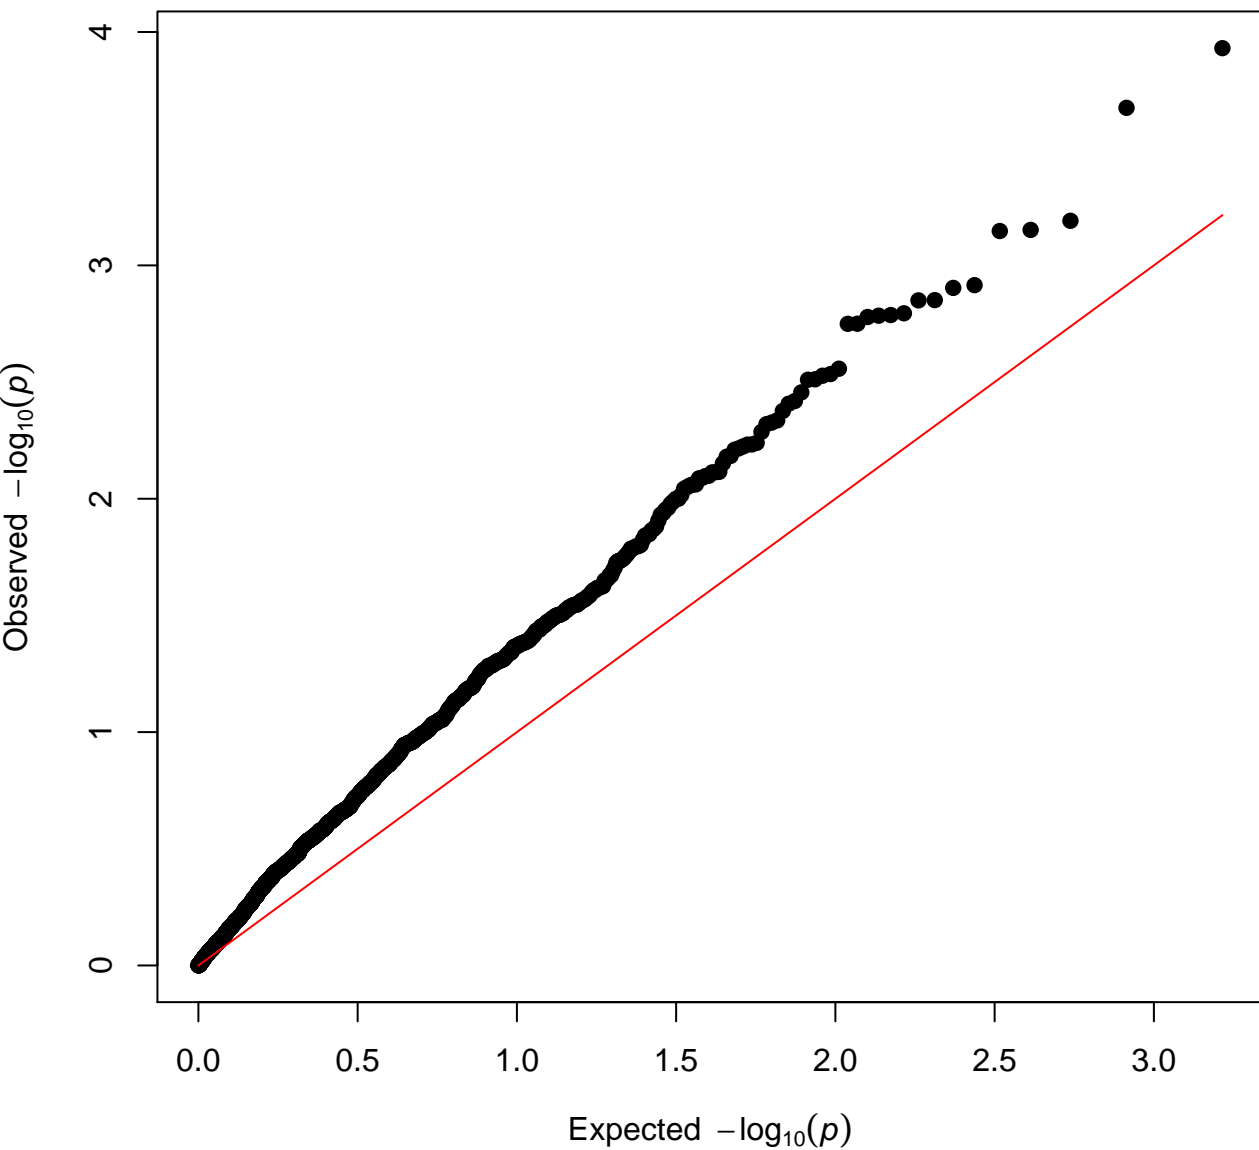

# LMM, X24\_Co59

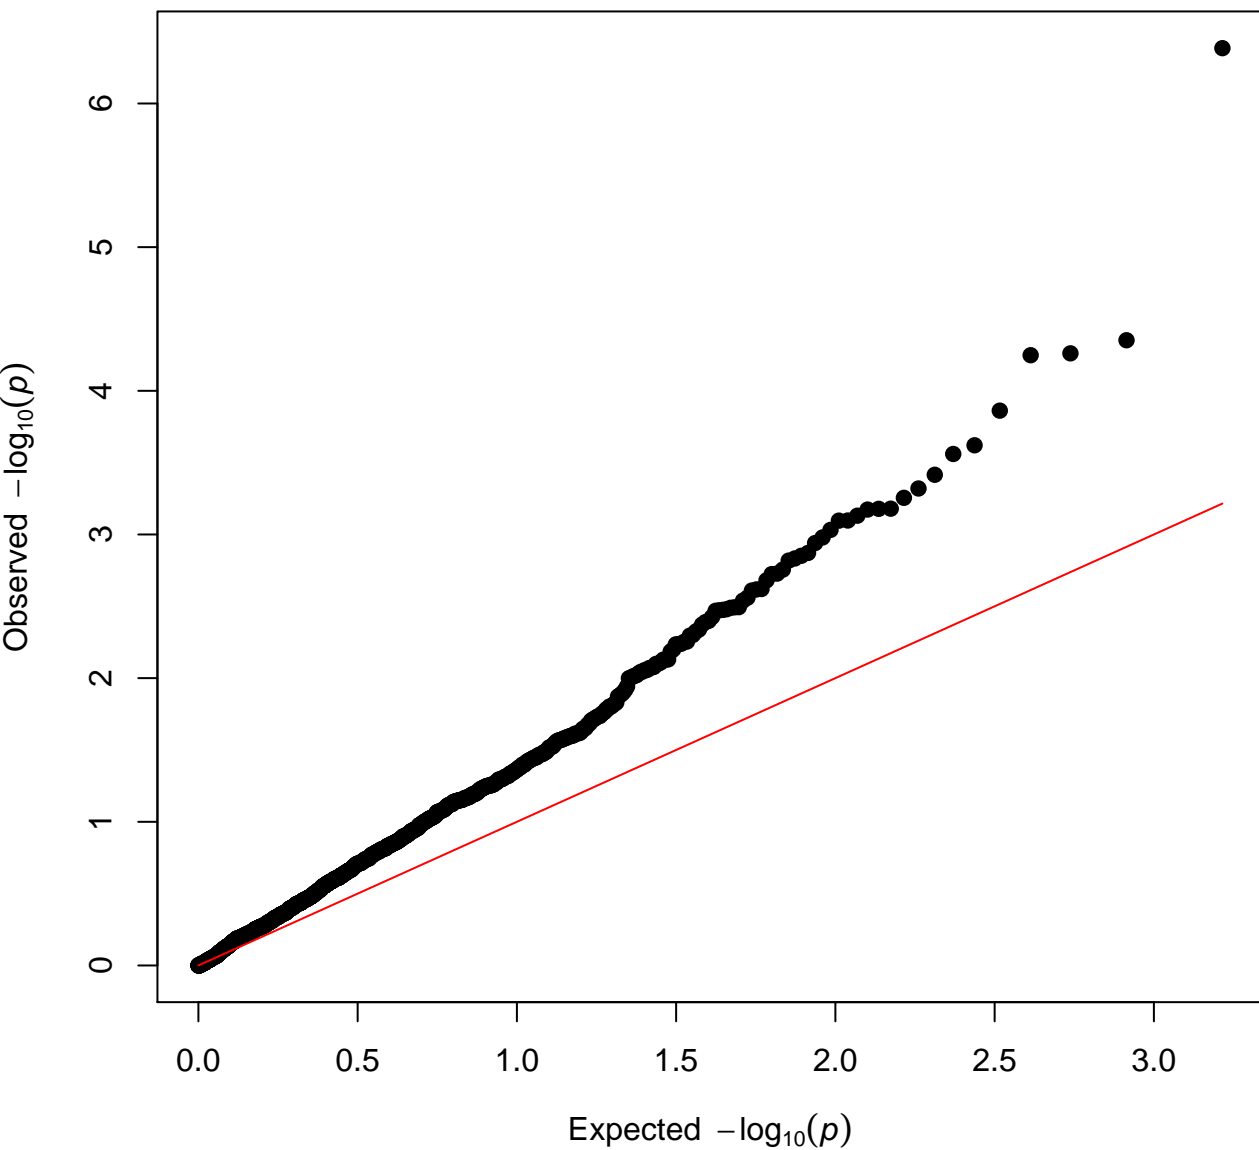



# LMM, X25\_Ni60

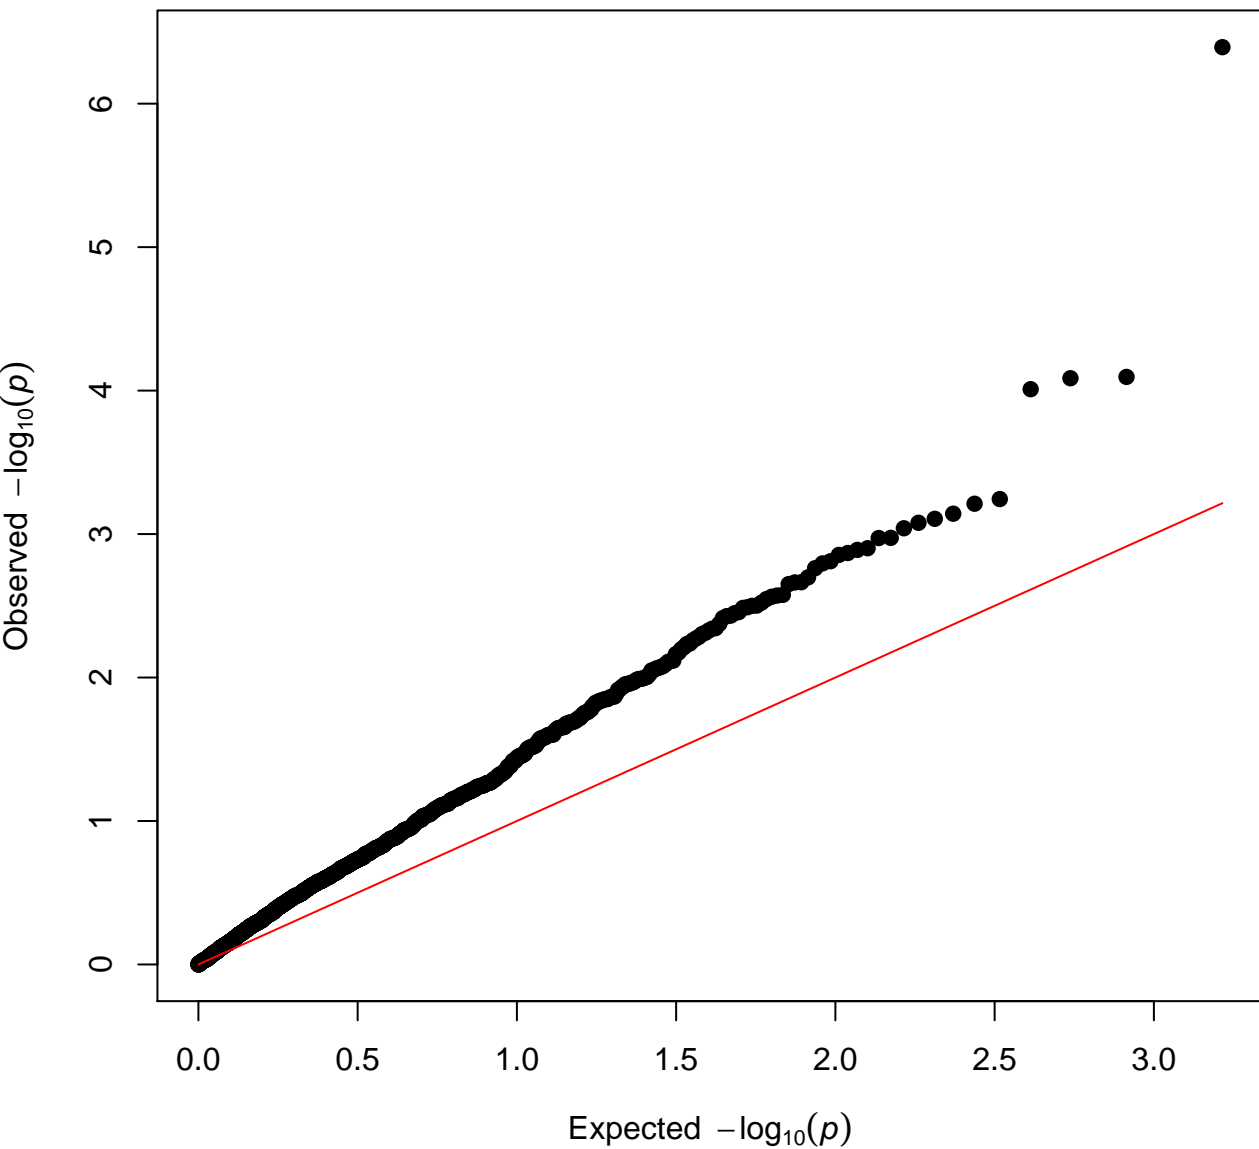

# LMM, X26\_Cu65

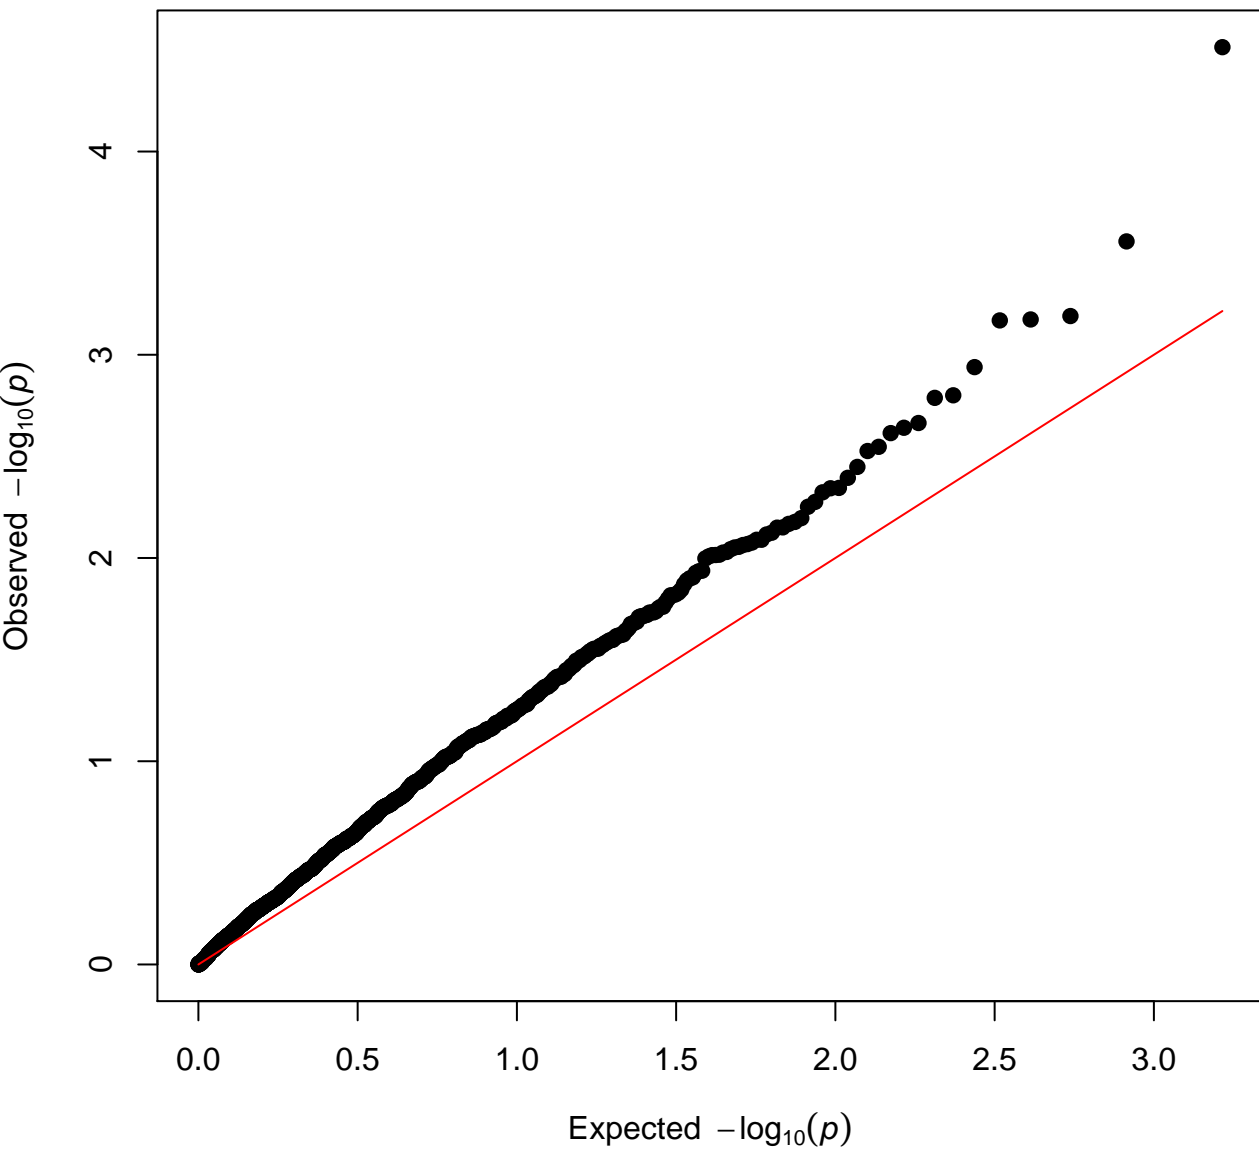

# LMM, X27\_Zn66

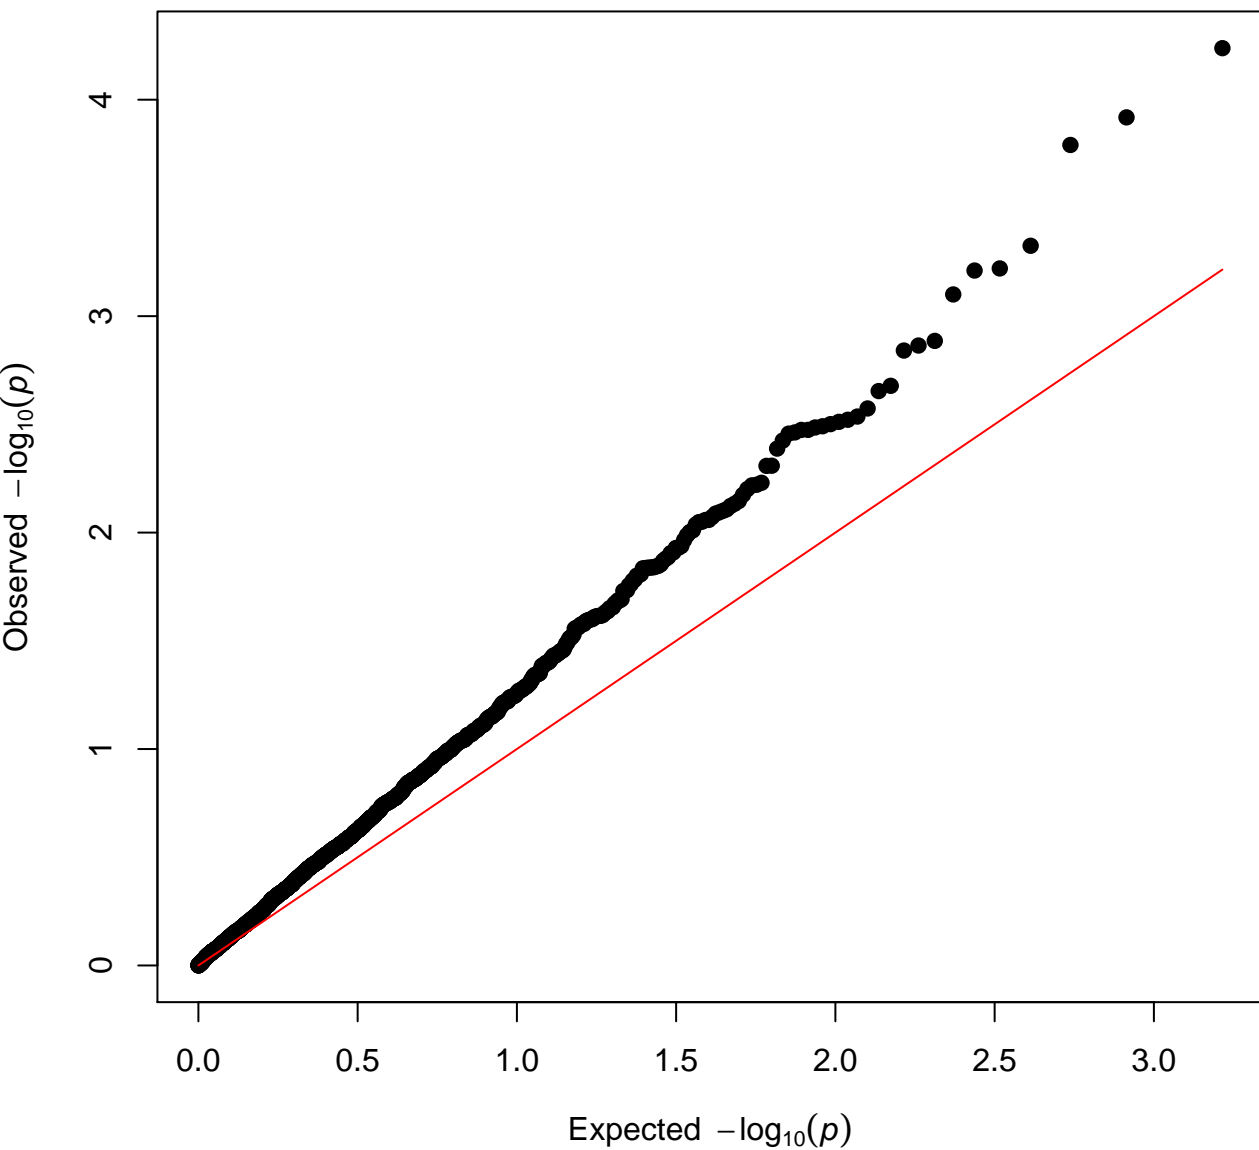

# LMM, X28\_As75

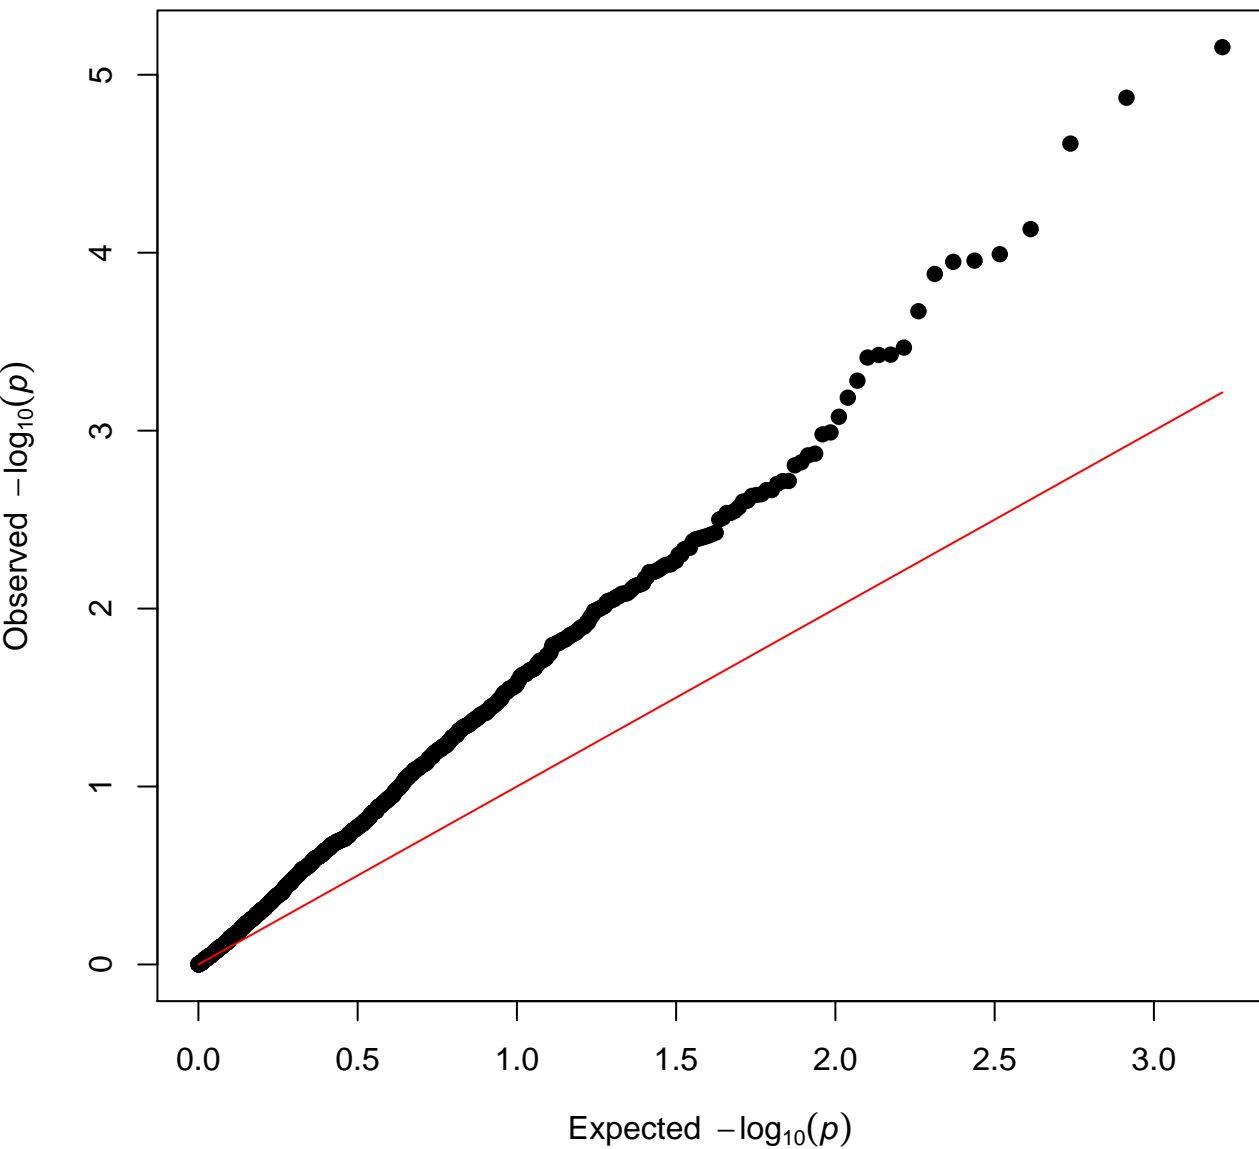

# LMM, X29\_Se82

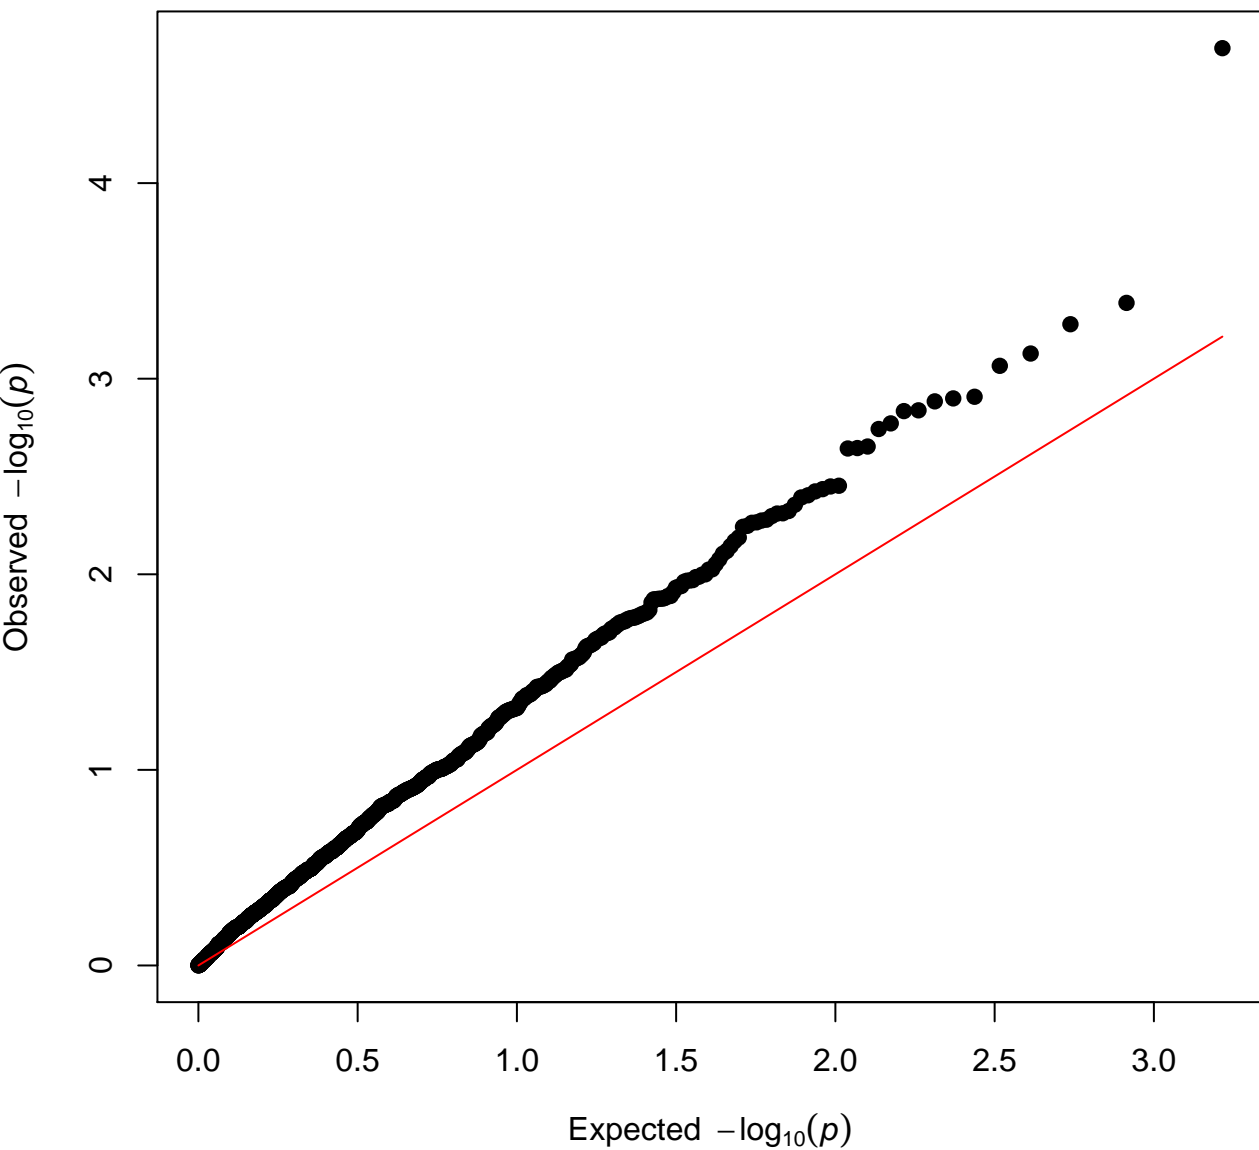

# LMM, X30\_Mo98

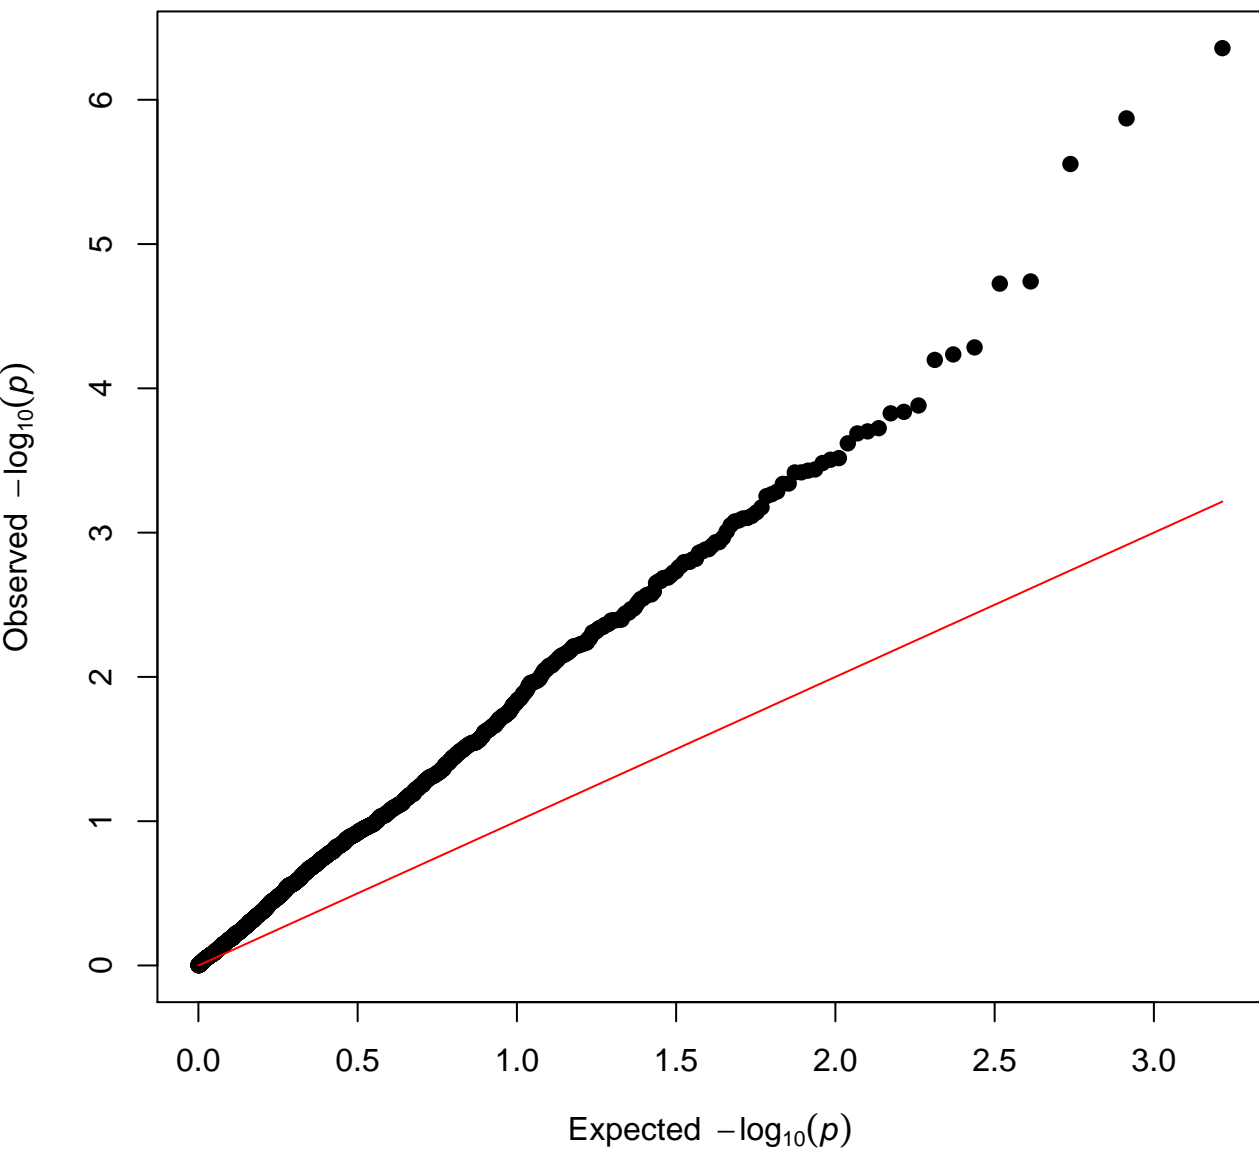

# LMM, X31\_Cd114

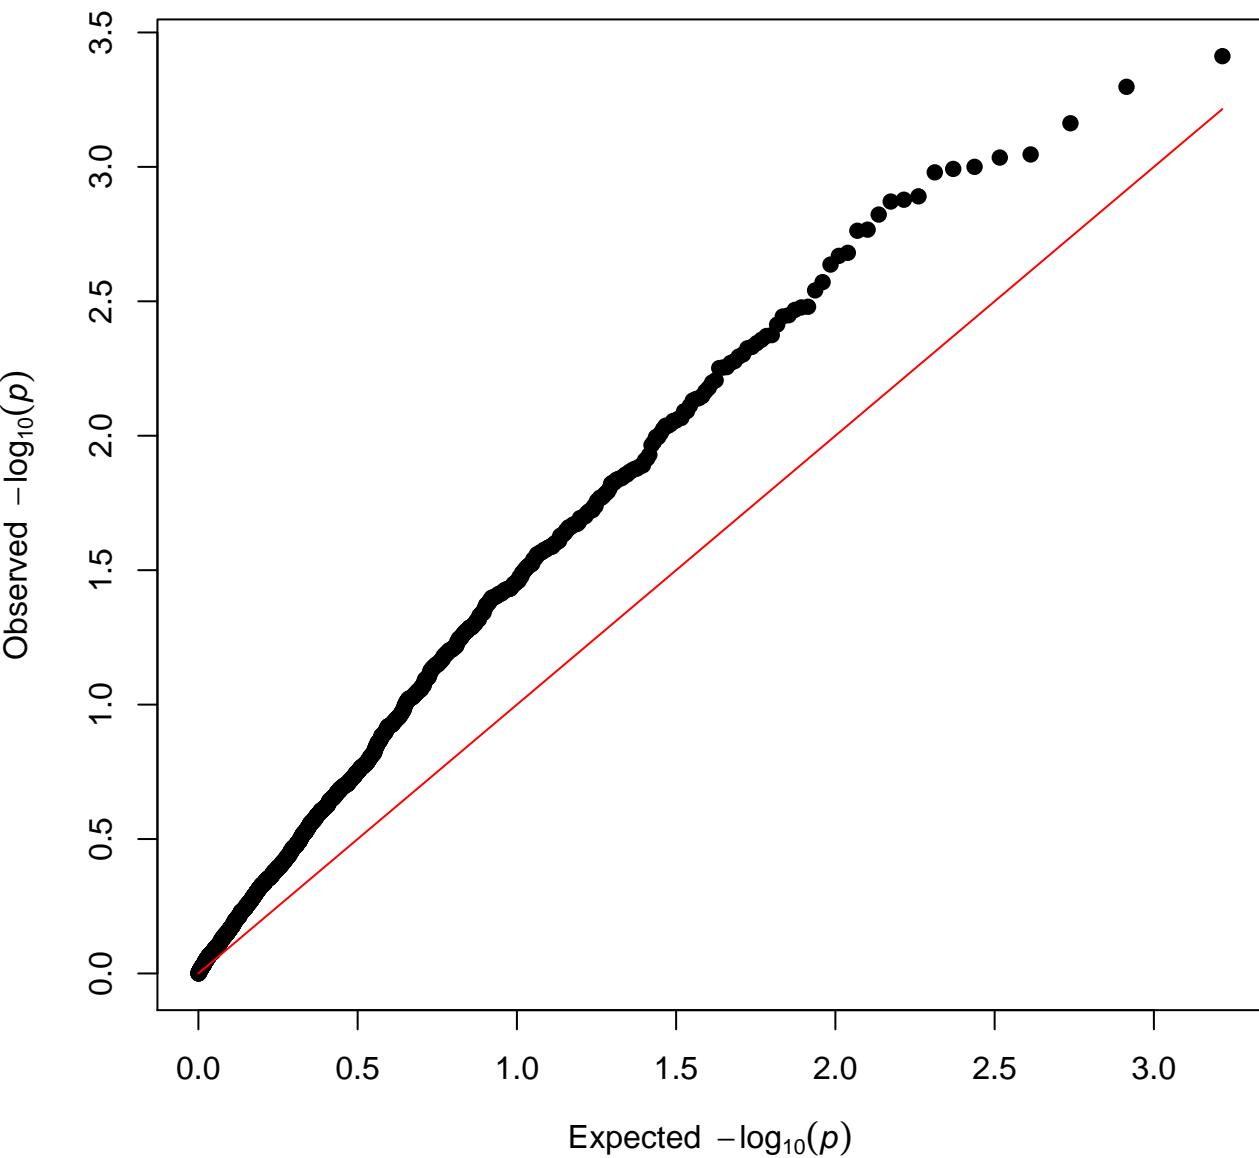

# LMM, X32\_avrPphB

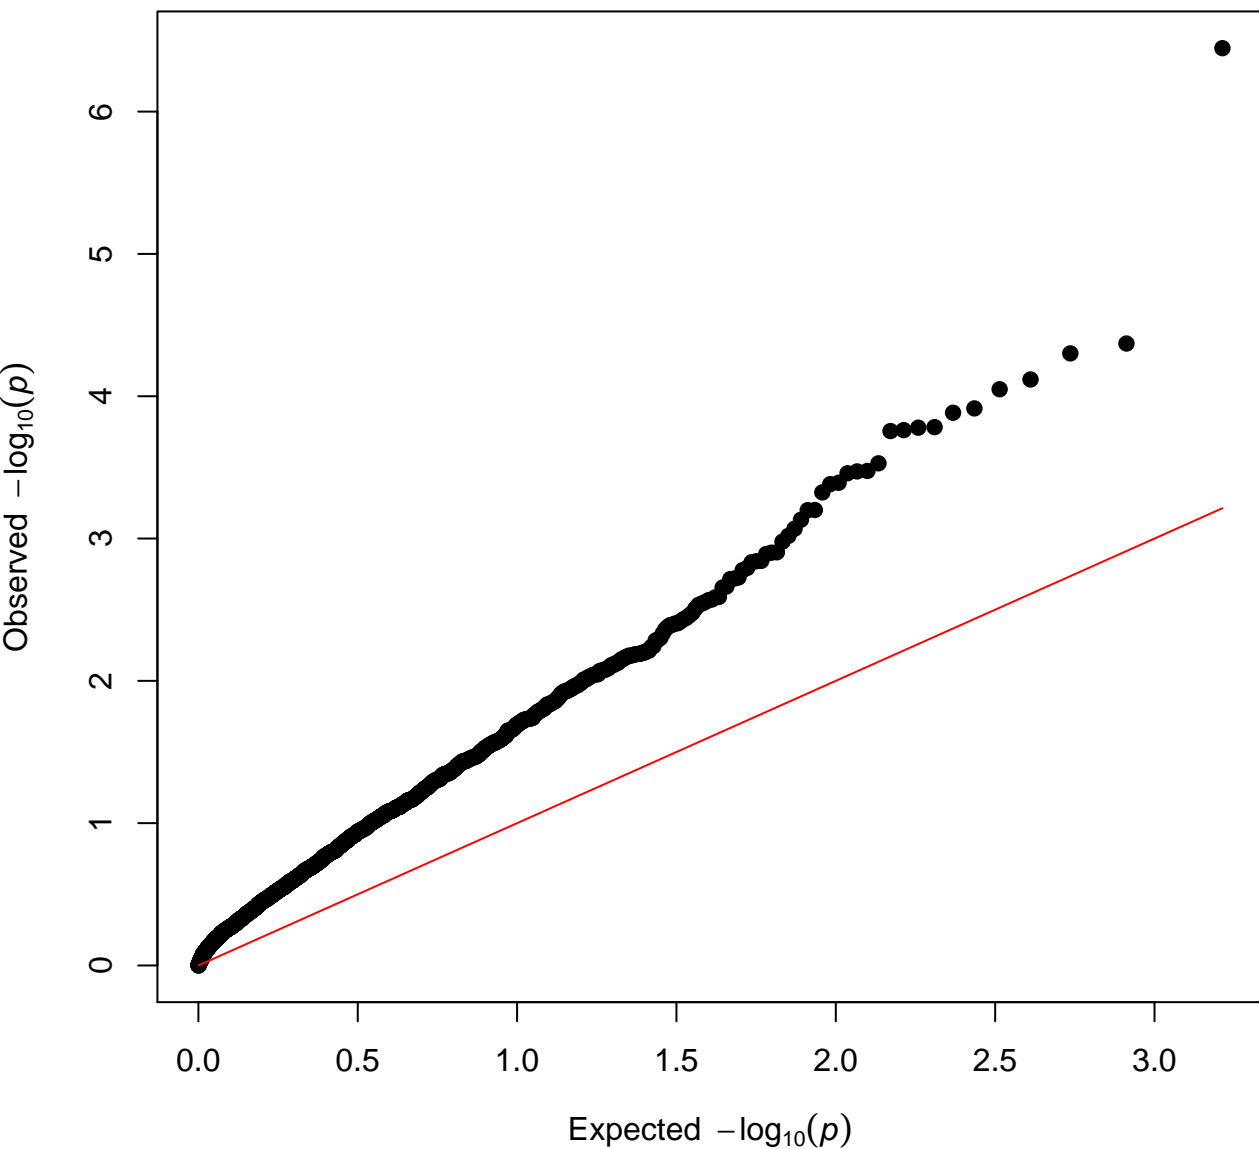



# LMM, X33\_avrRpm1

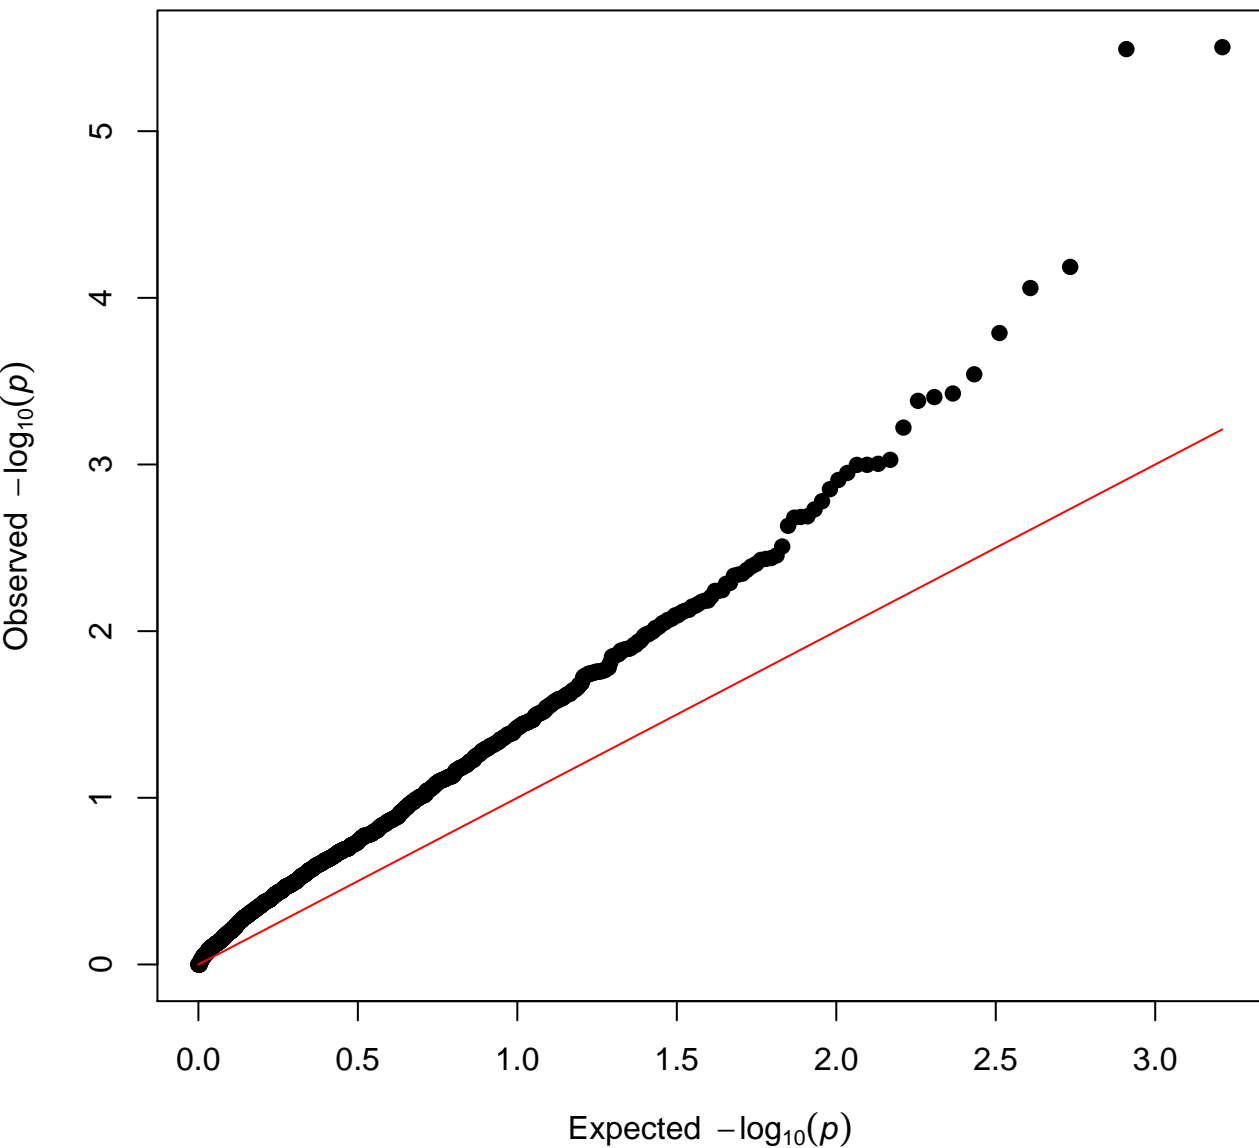

# LMM, X34\_avrRpt2

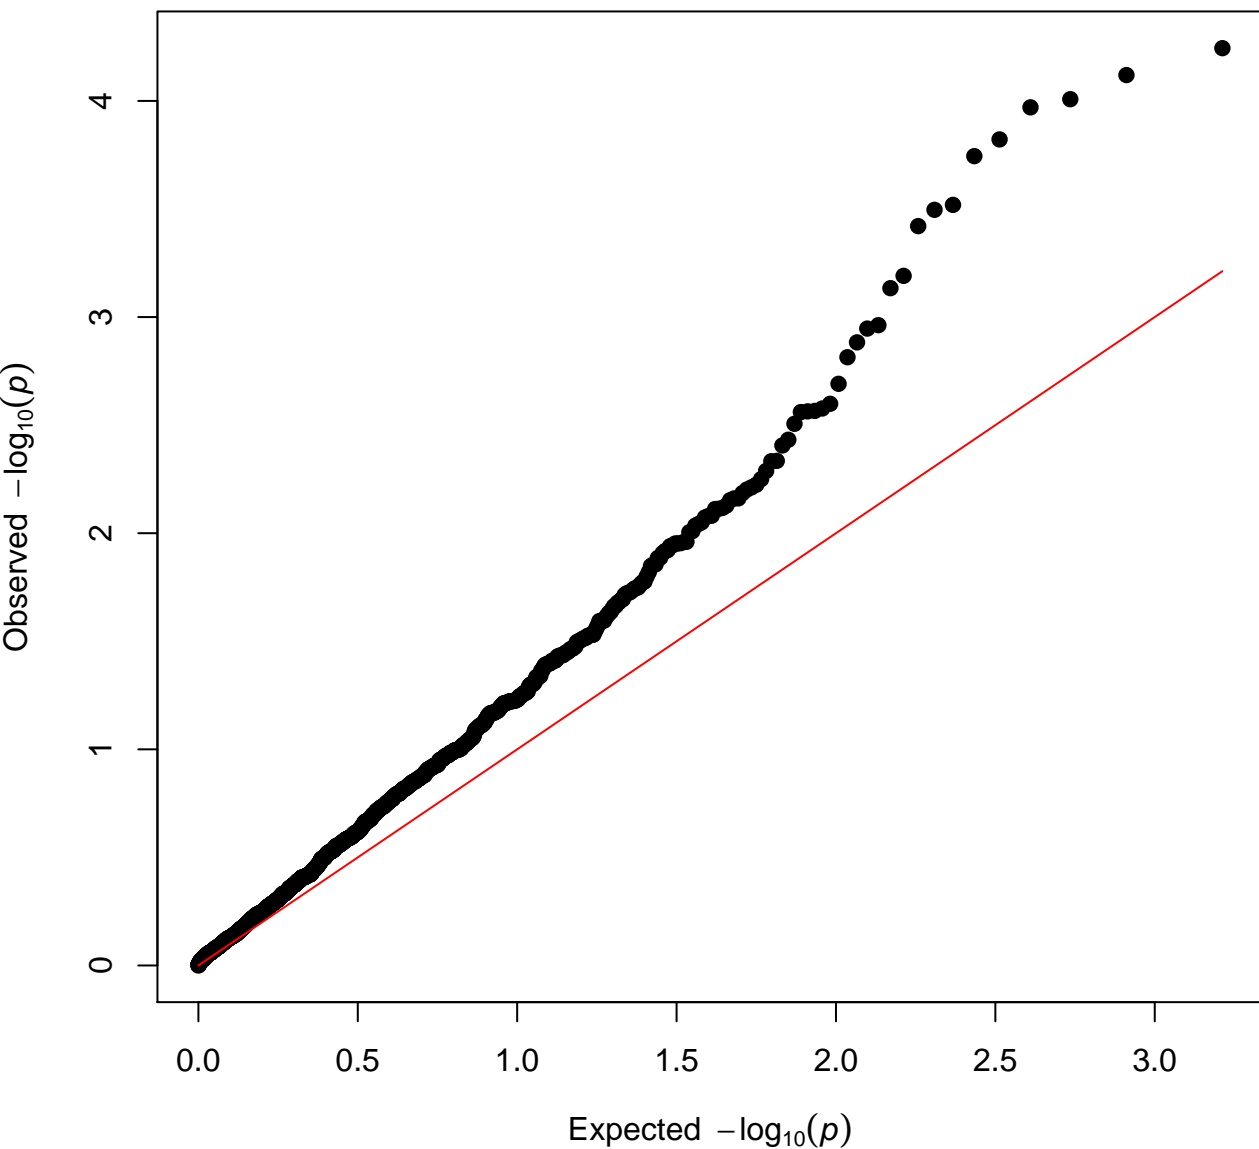

# LMM, X35\_avrB

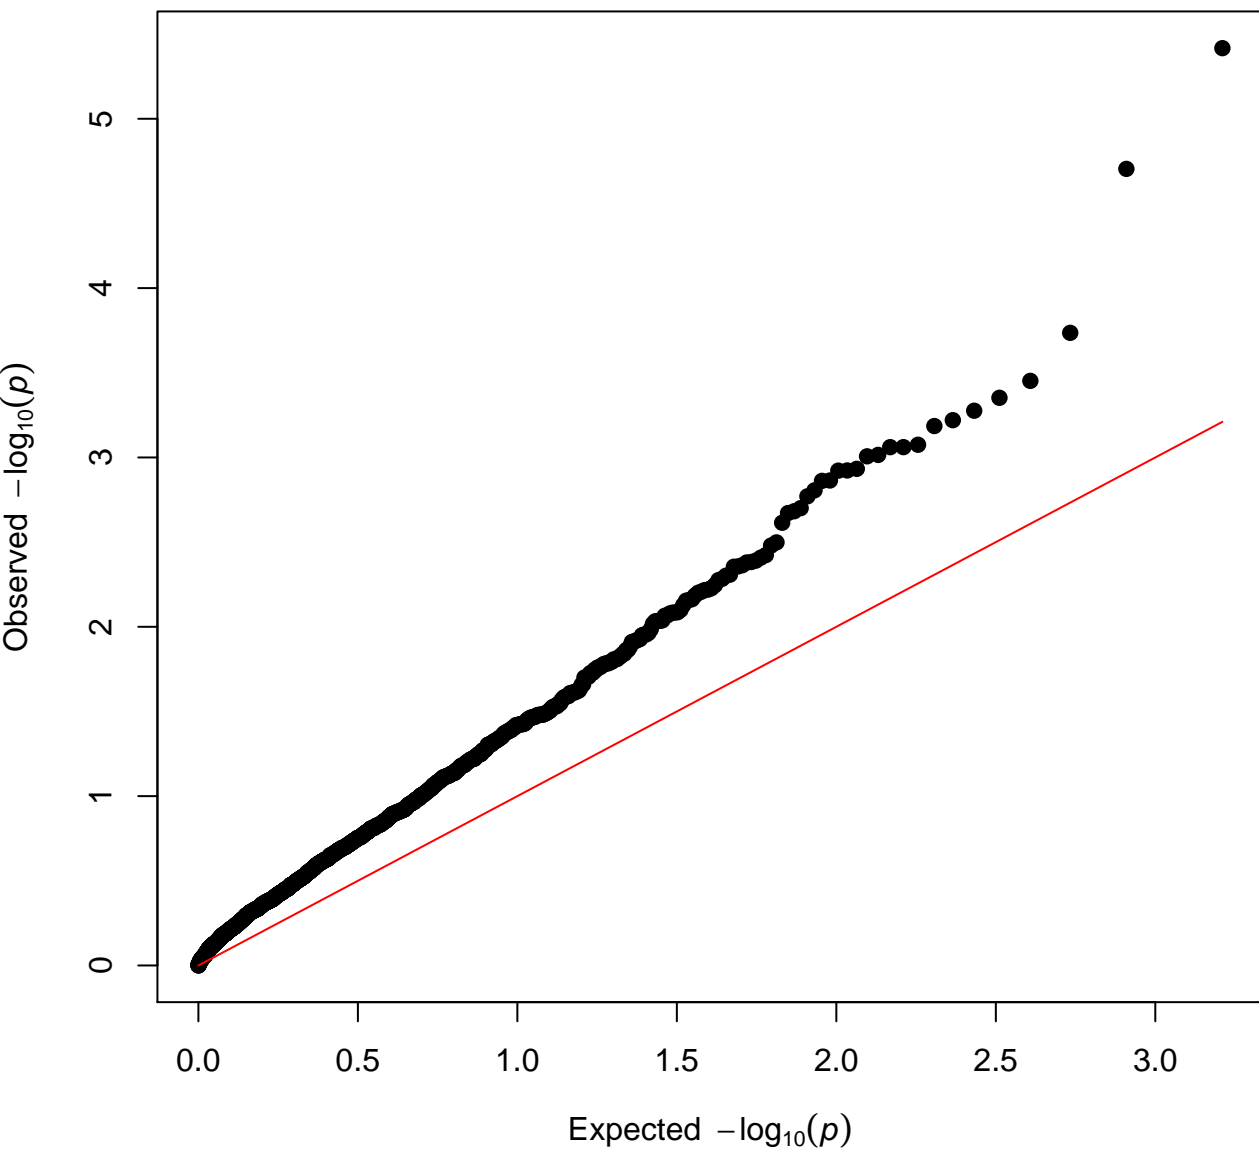

# LMM, X39\_0W

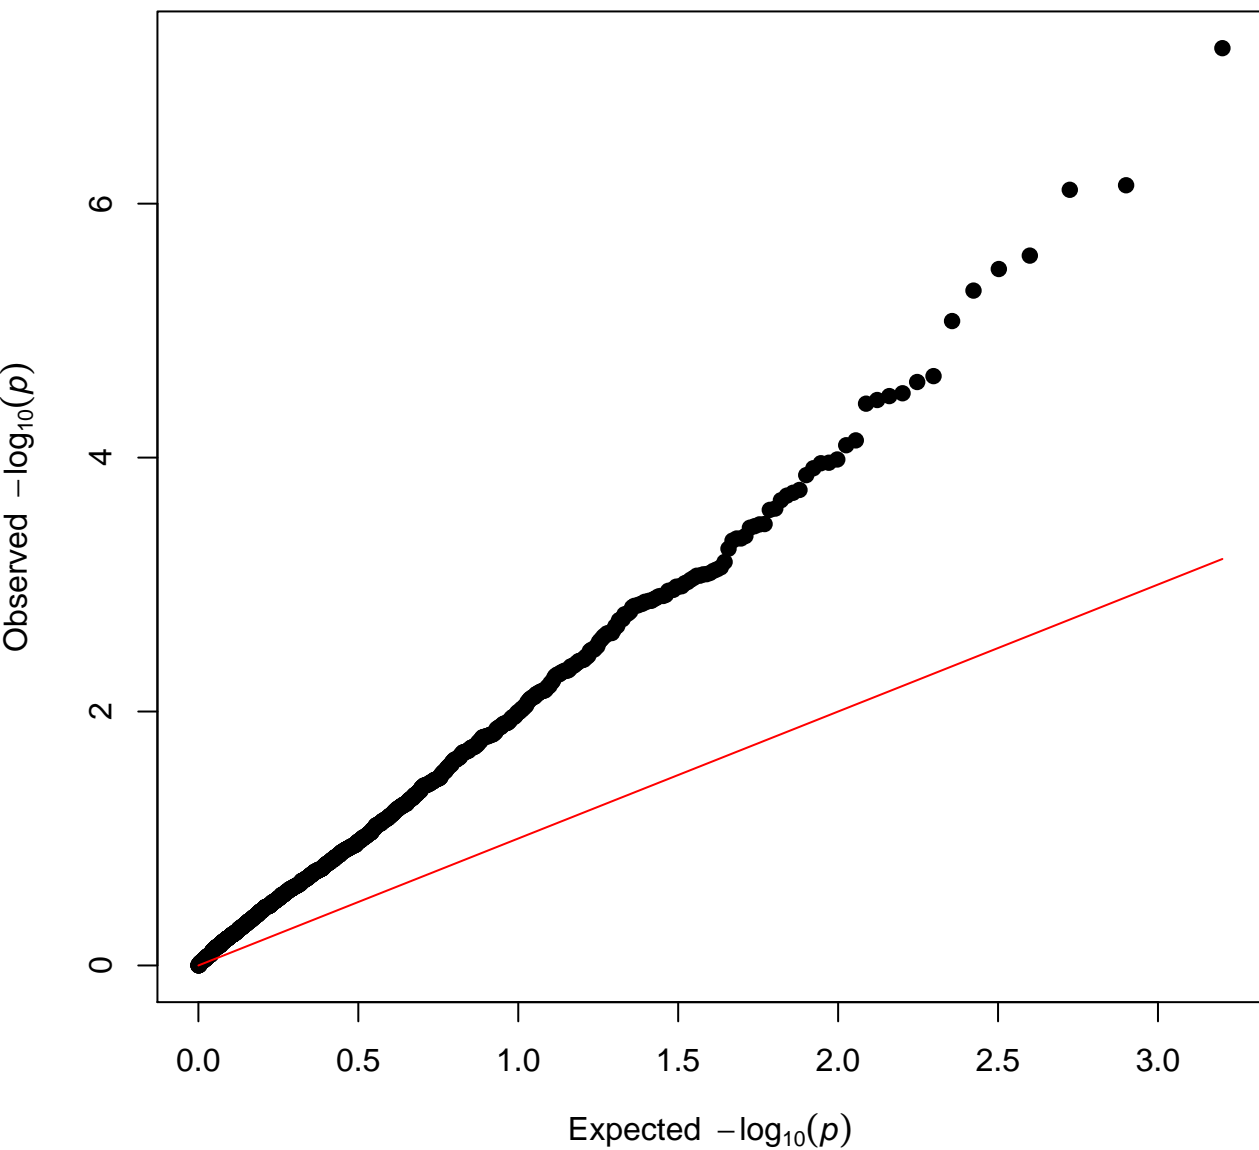

# LMM, X40\_2W

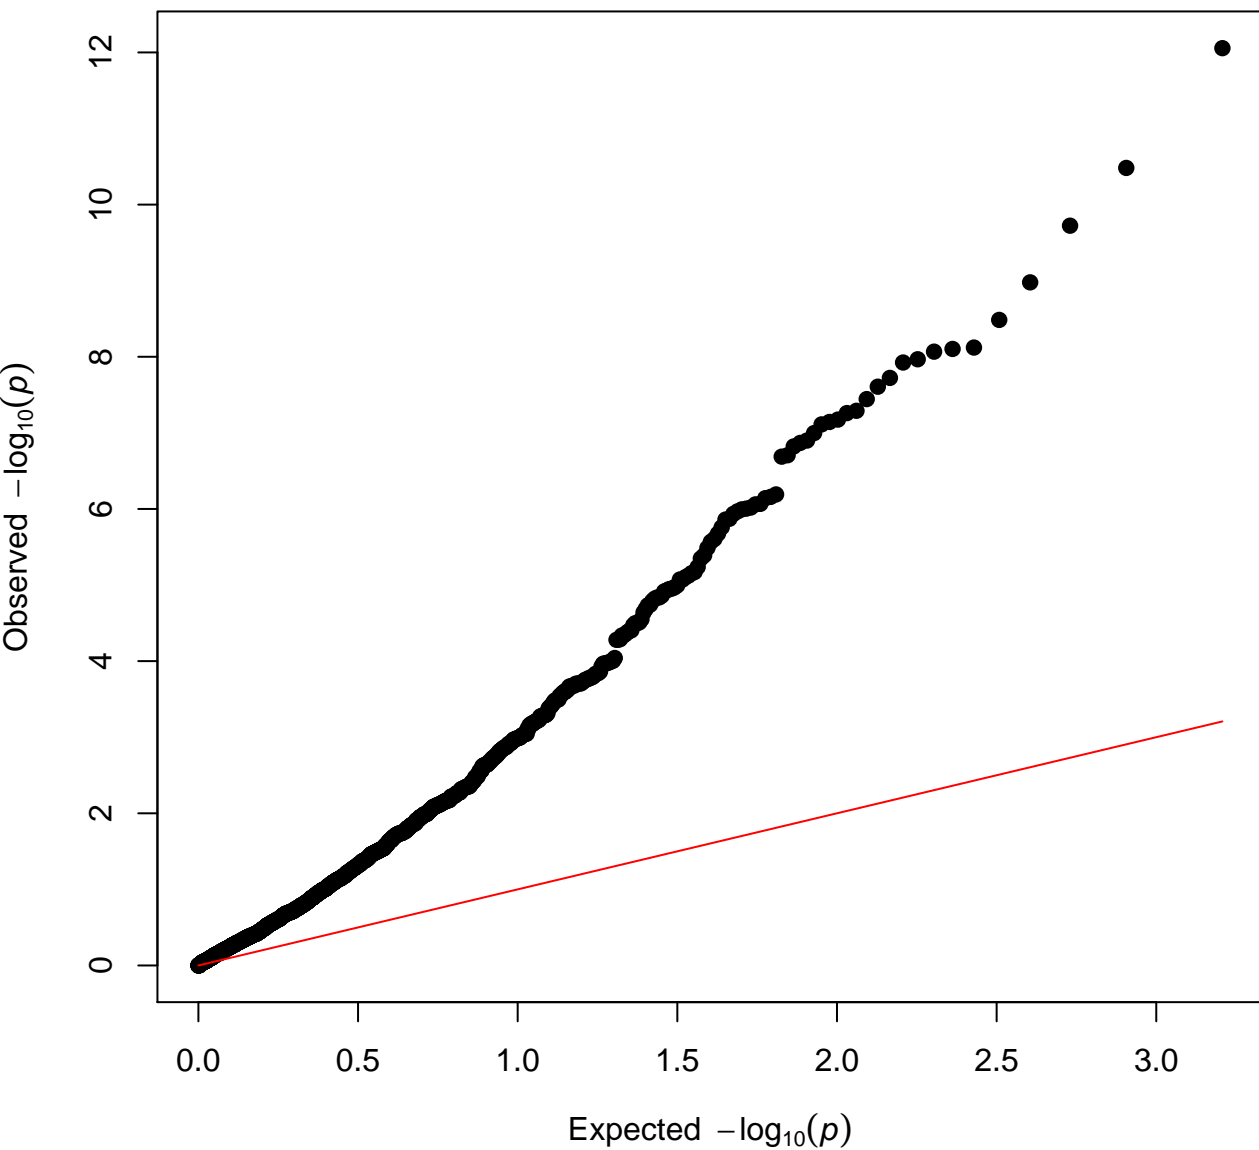

# LMM, X41\_4W

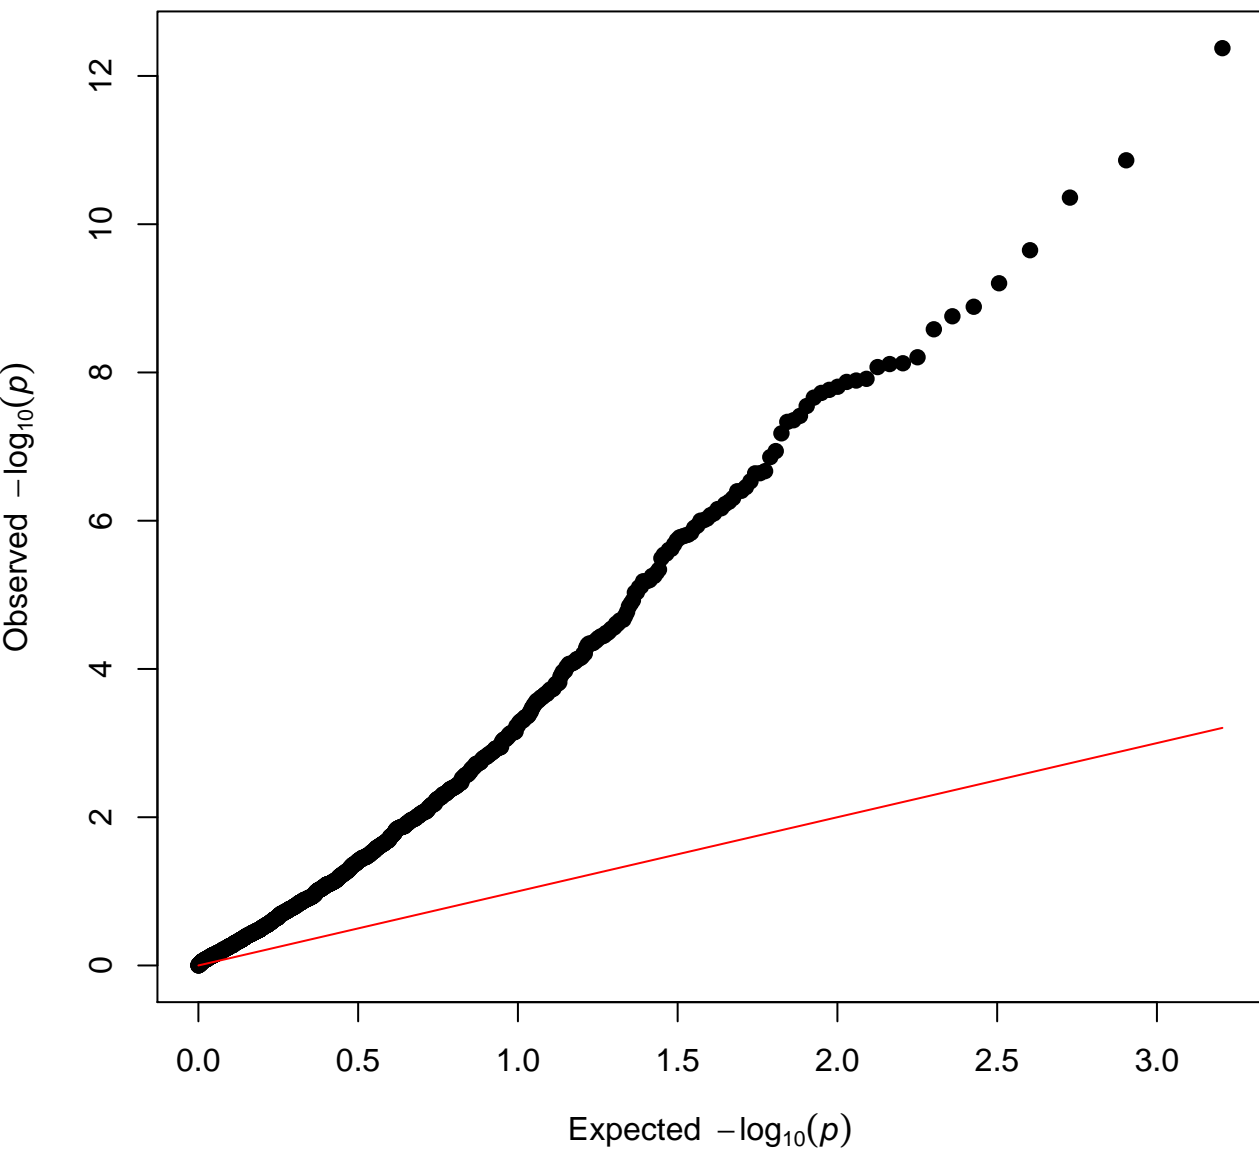

# LMM, X42\_8W

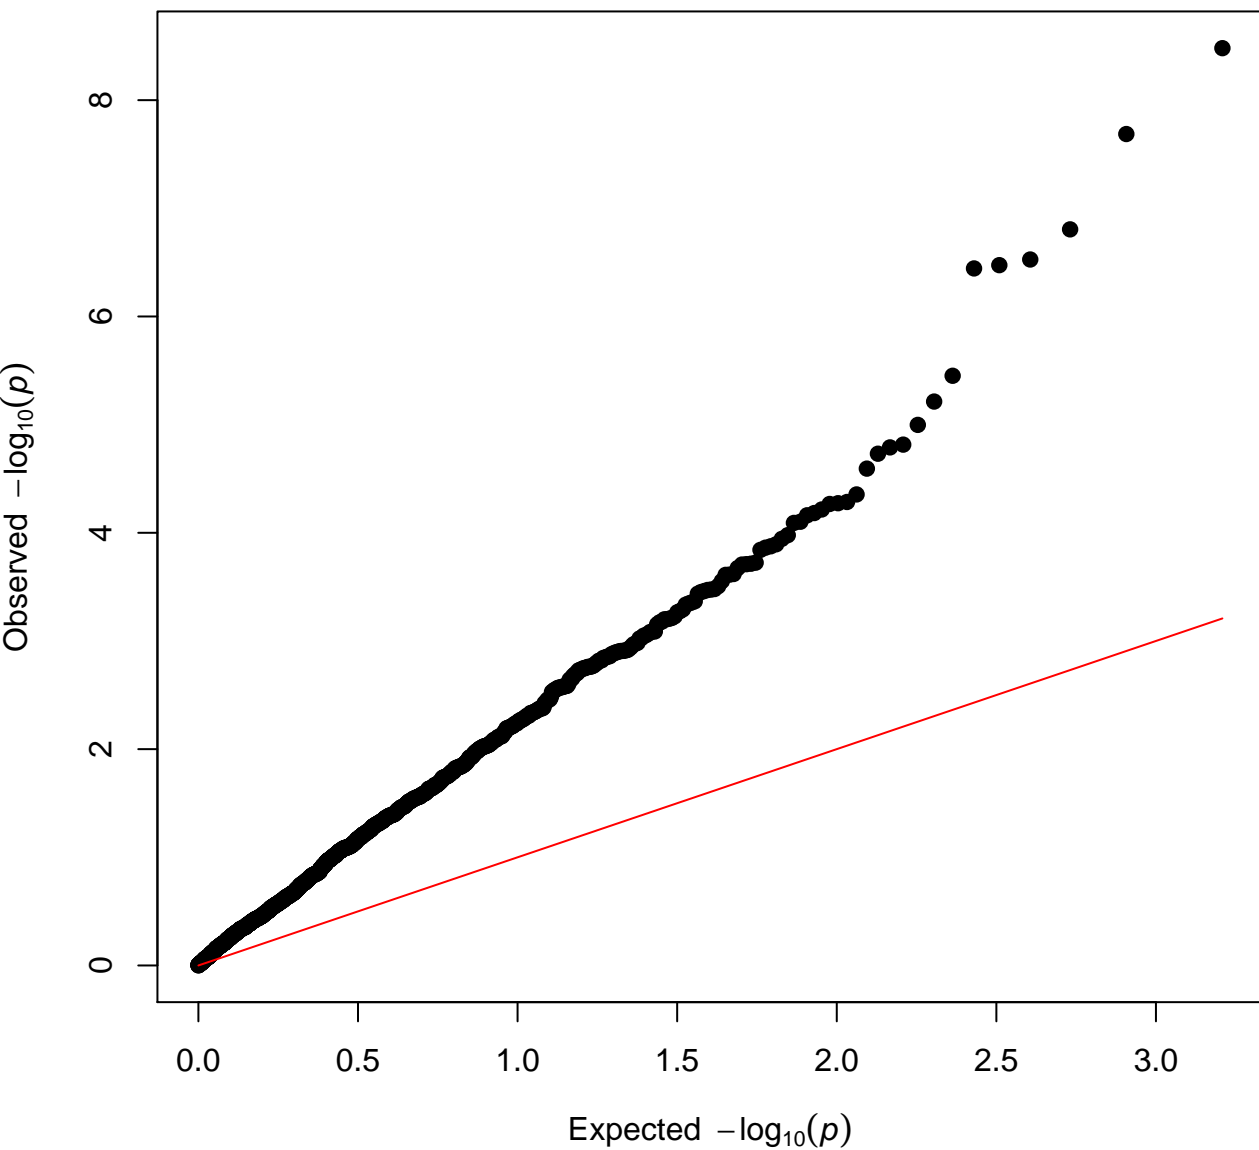

# LMM, X43\_FLC

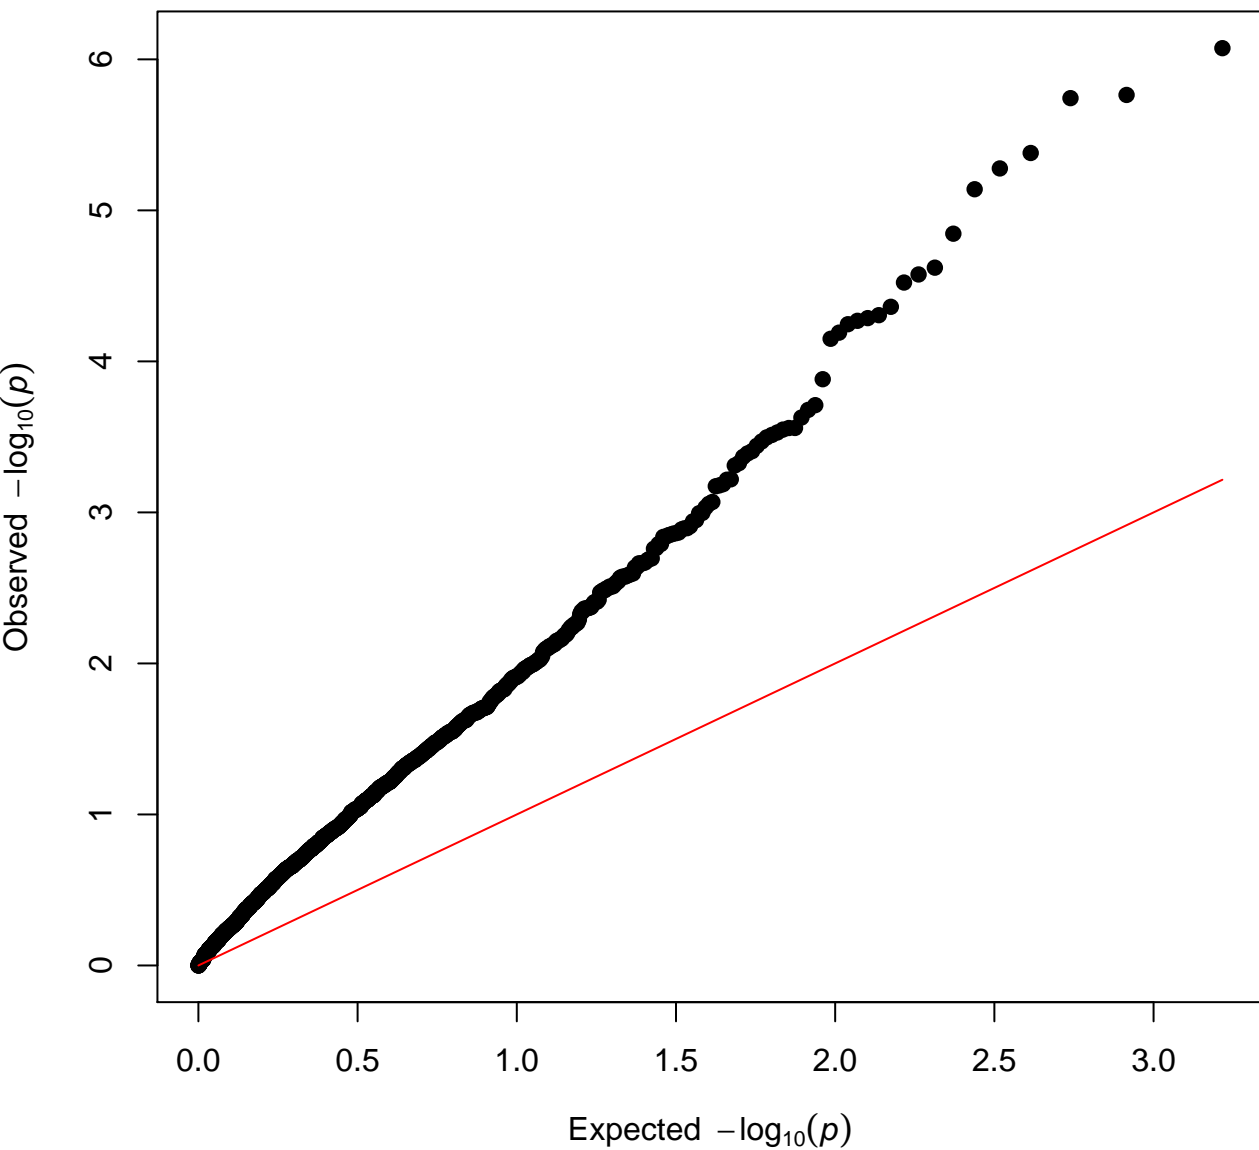



# LMM, X44\_FRI

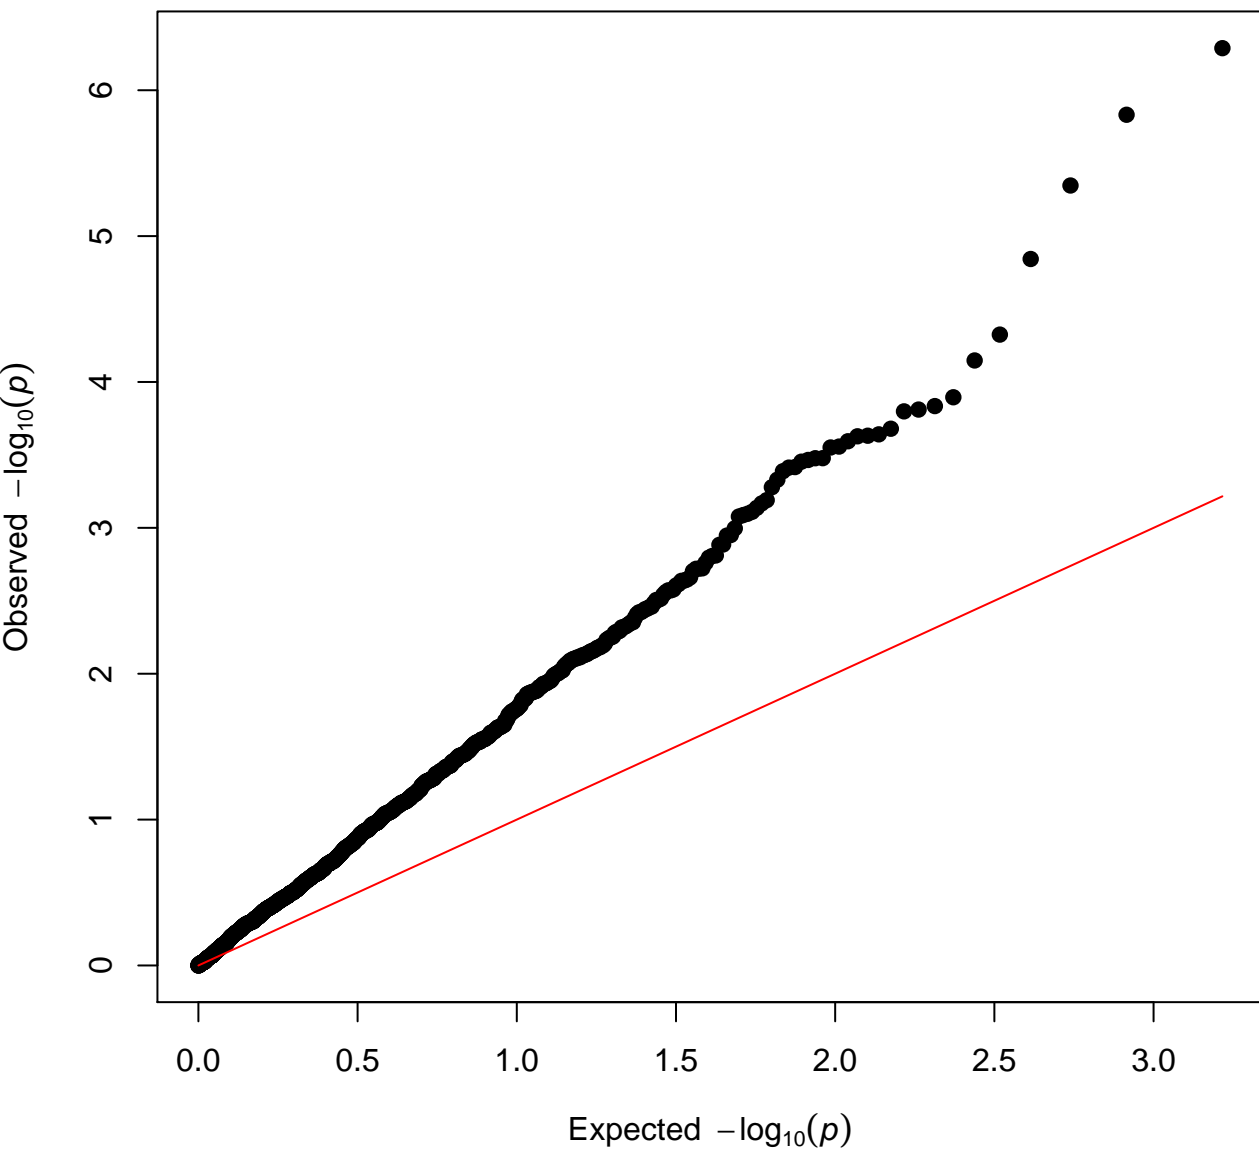

# LMM, X45\_8W.GH.FT

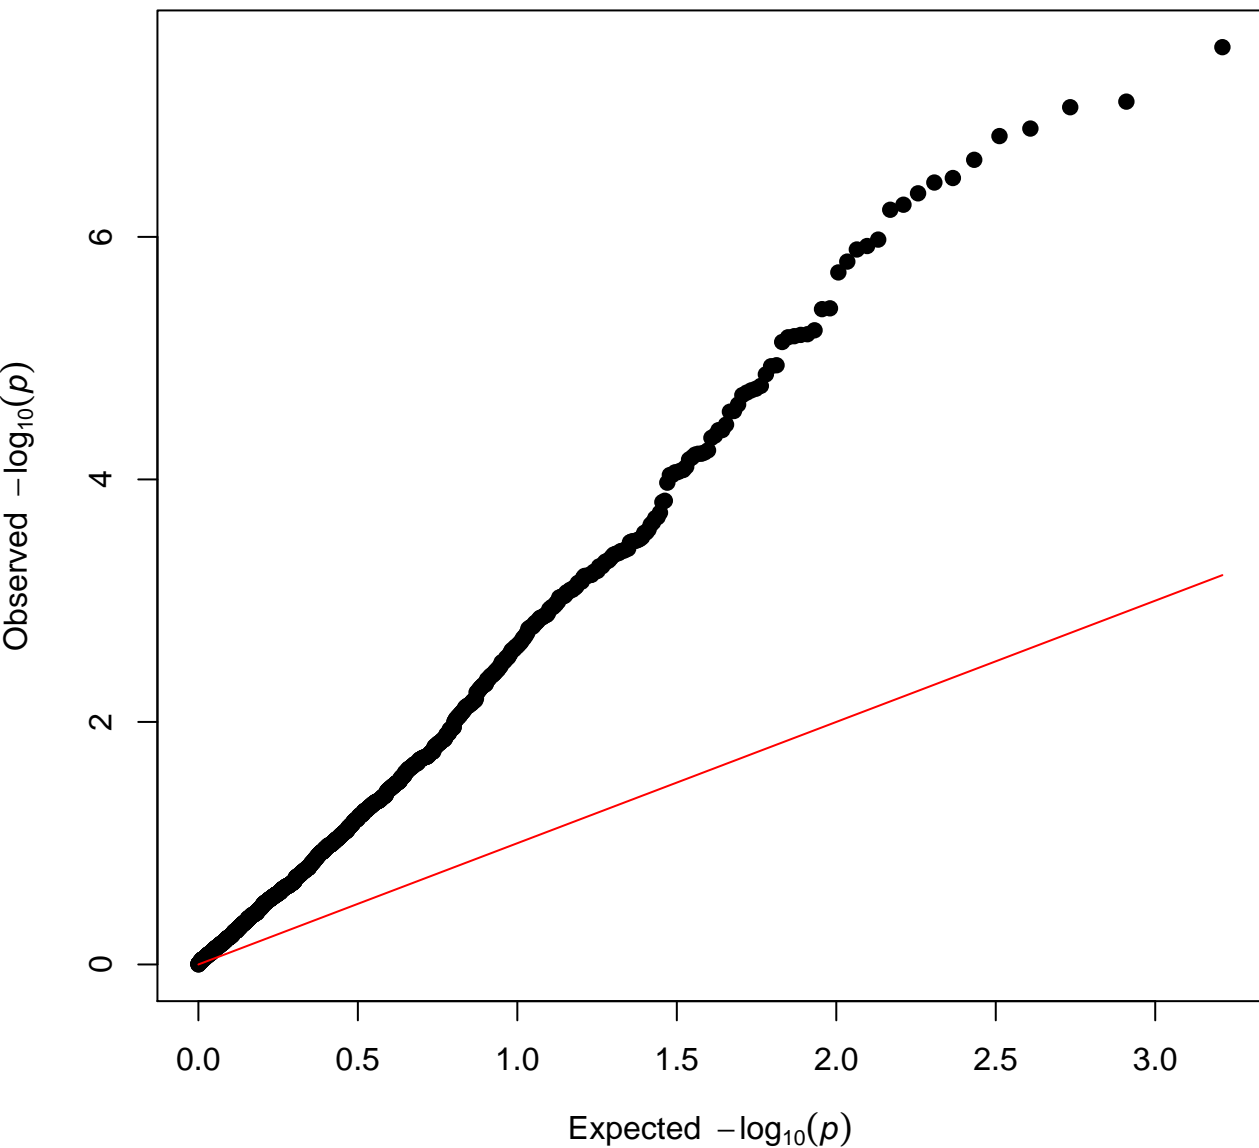

# LMM, X46\_8W.GH.LN

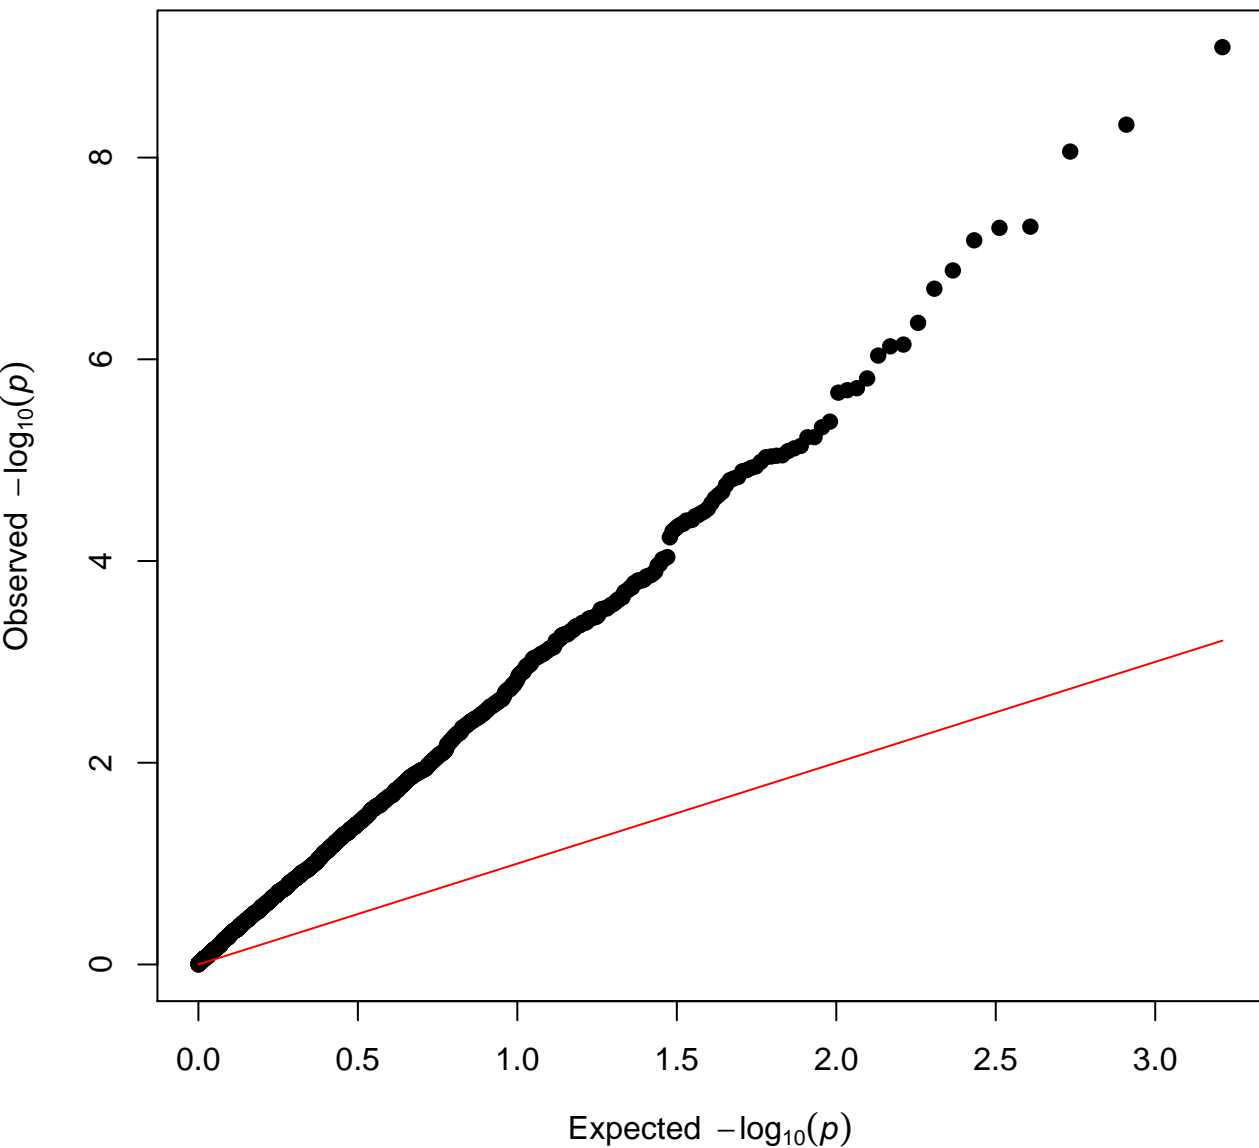

# LMM, X47\_0W.GH.FT

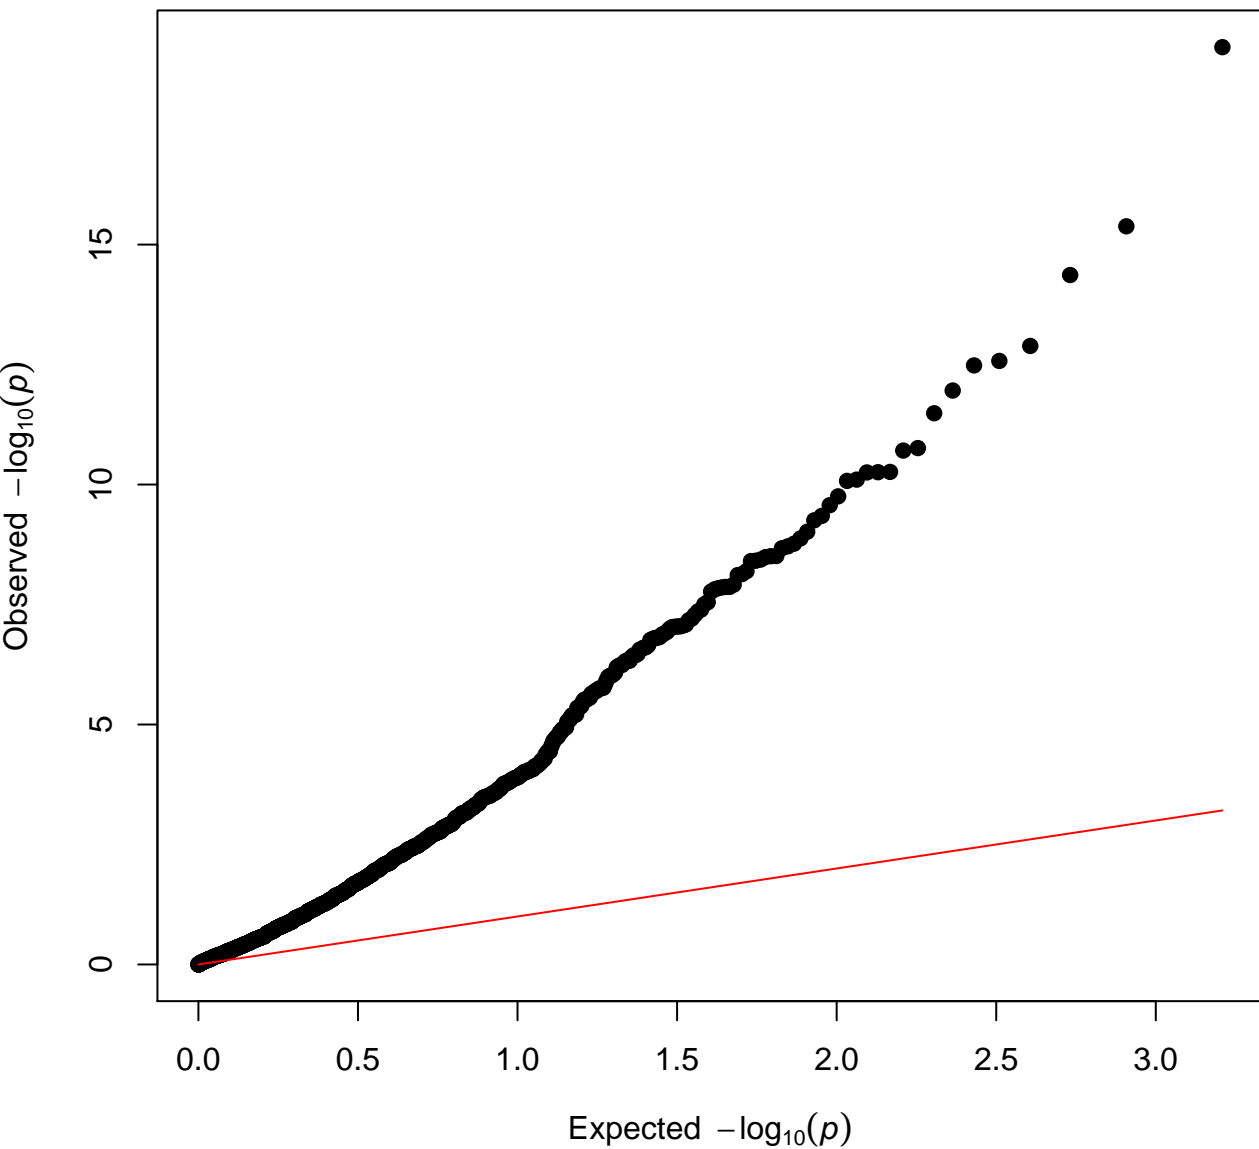

# LMM, X48\_0W.GH.LN

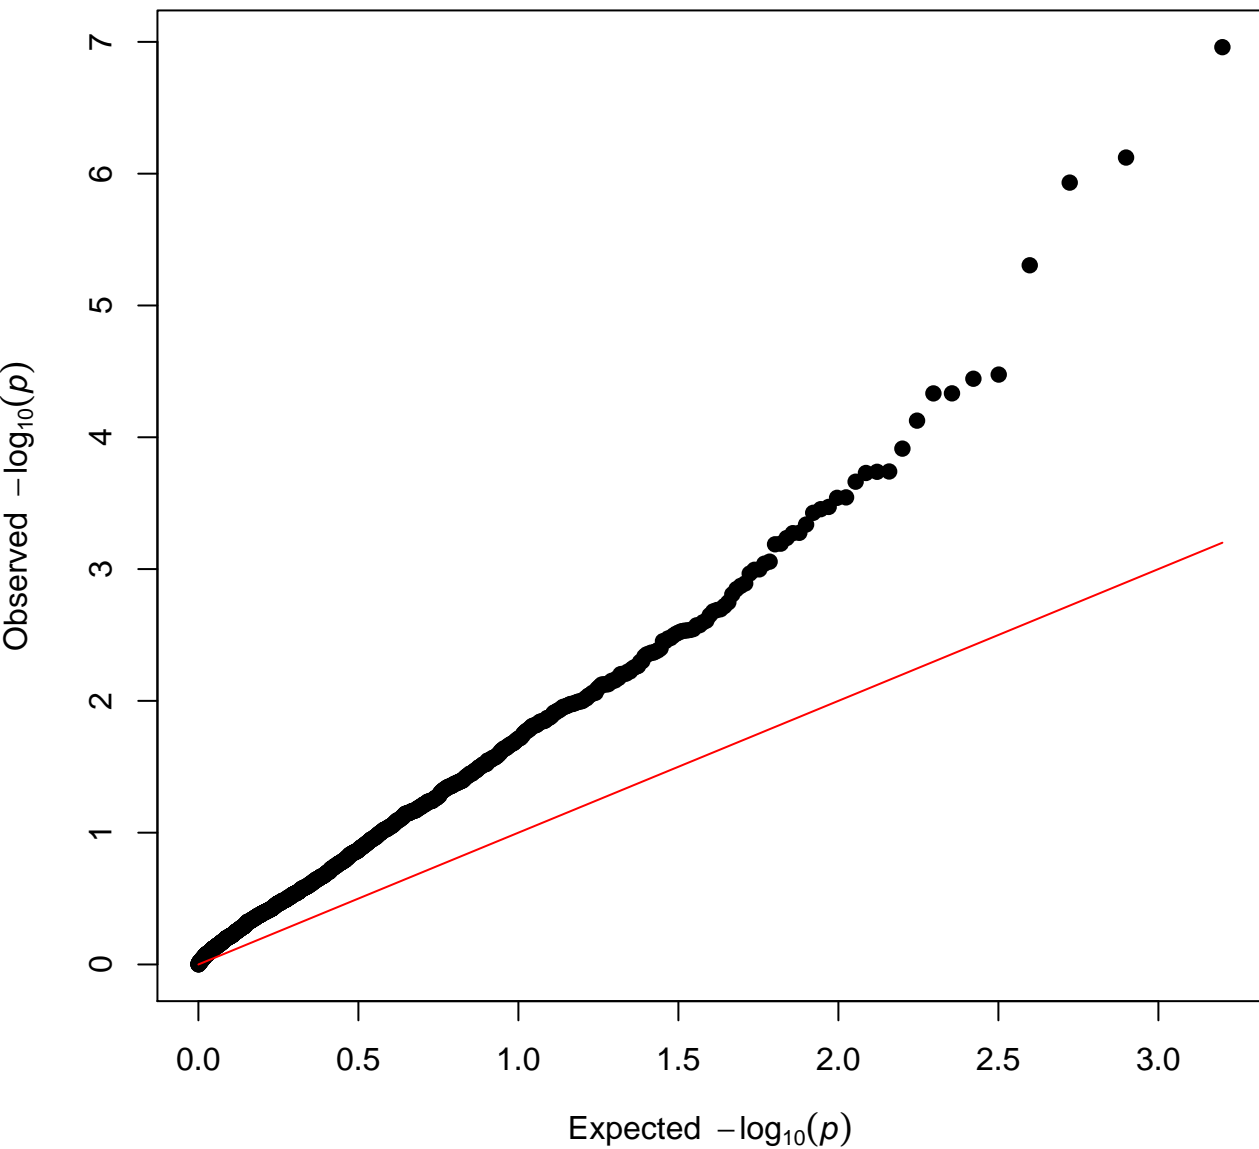

# LMM, X57\_FT.Field

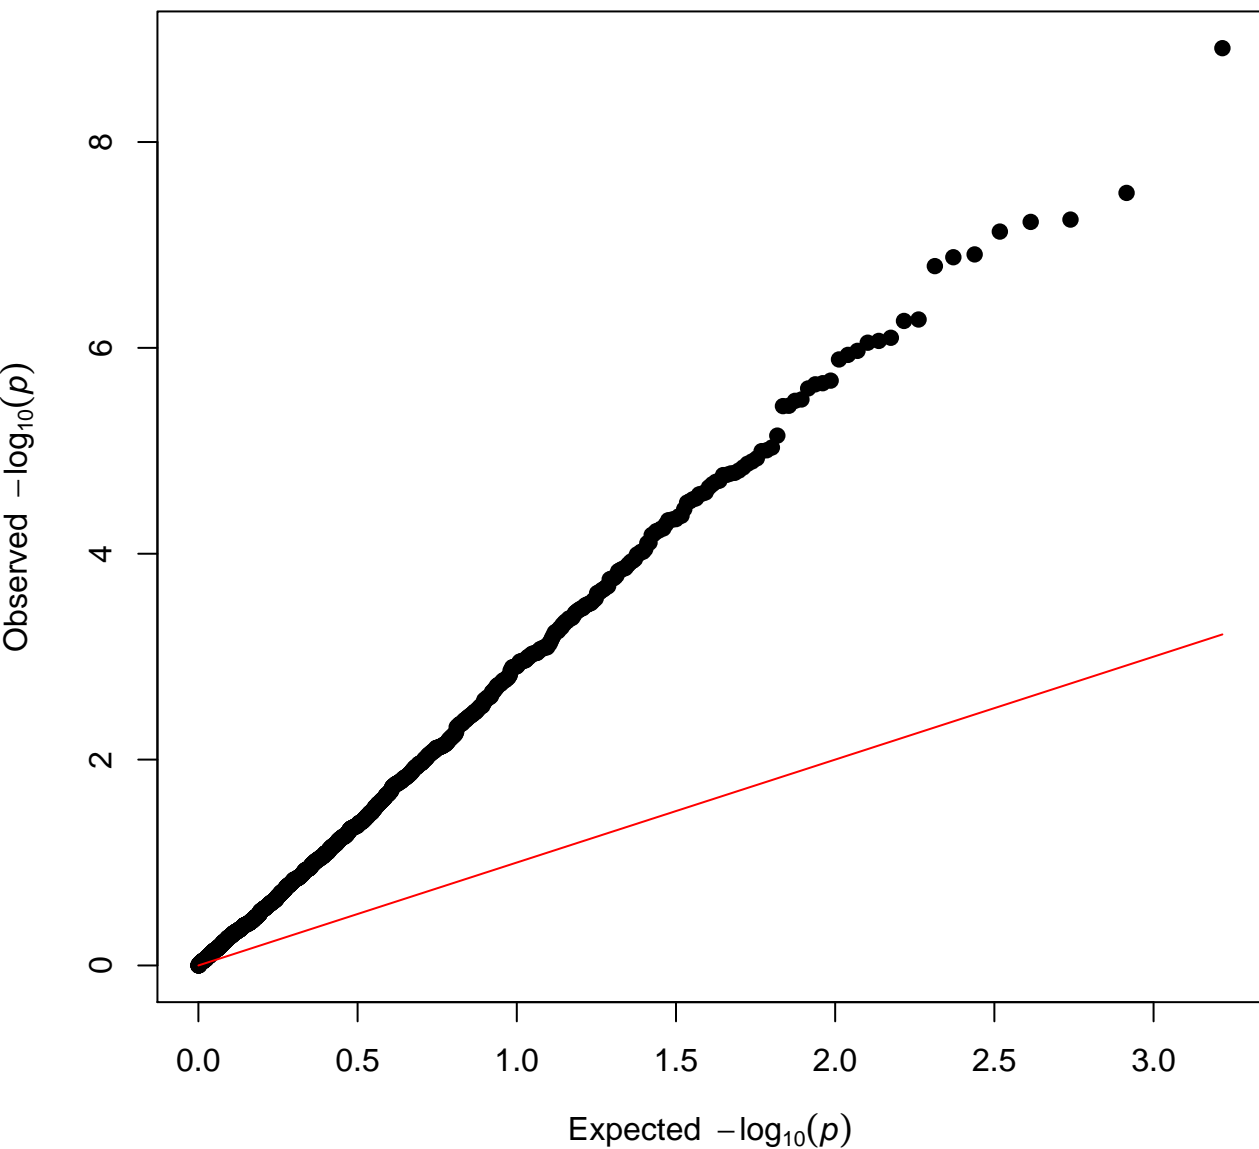

# LMM, X58\_FT.Diameter.Field

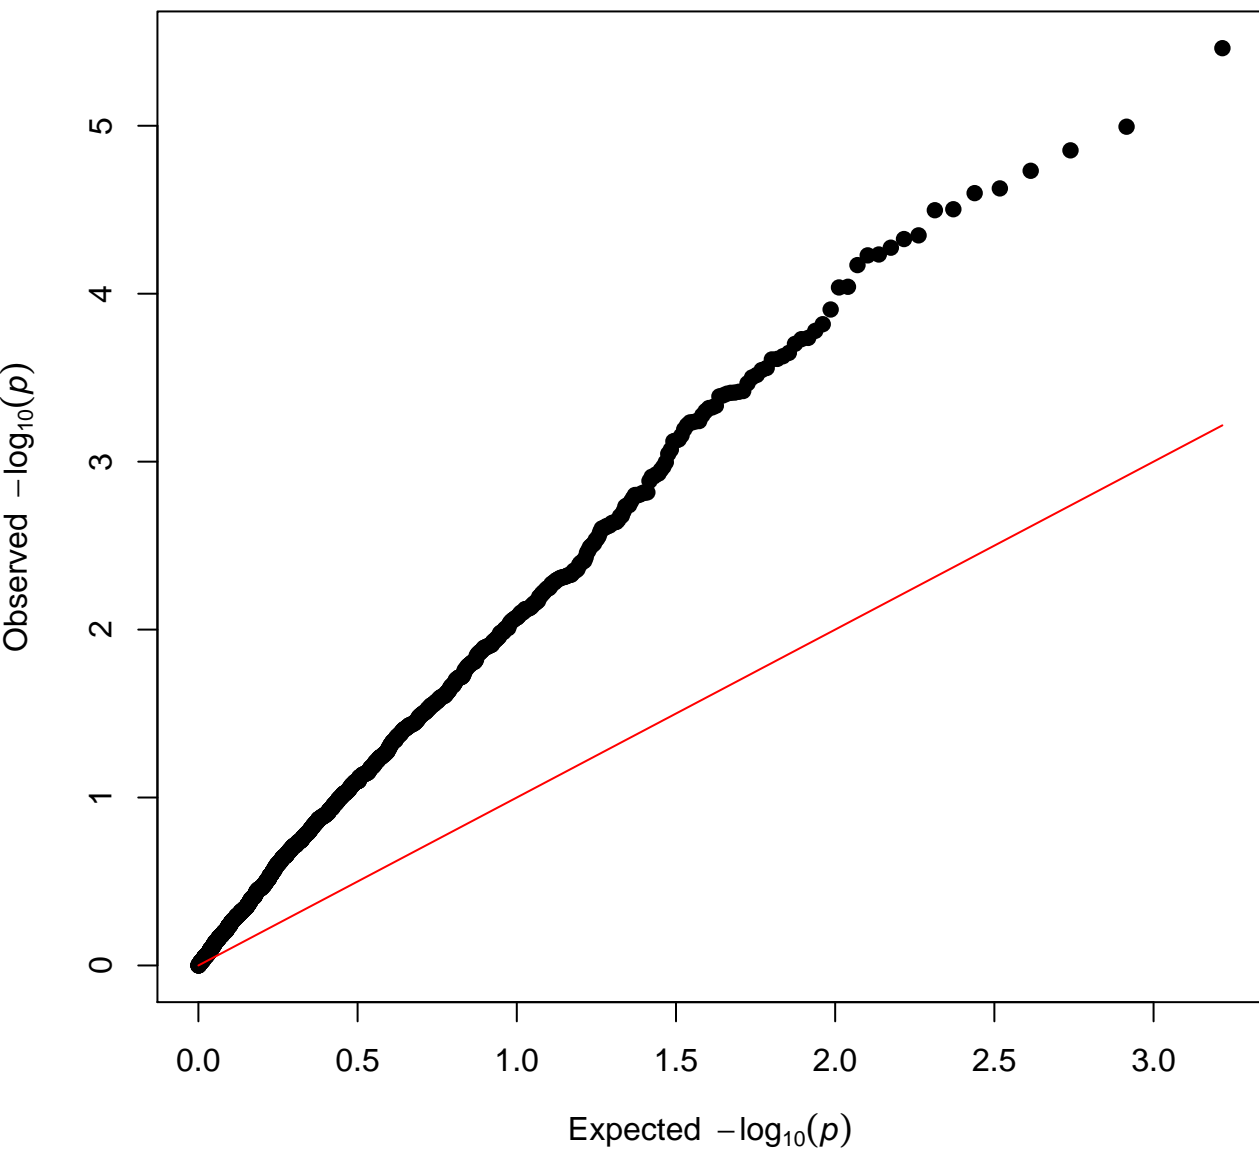

# LMM, X59\_FT.GH

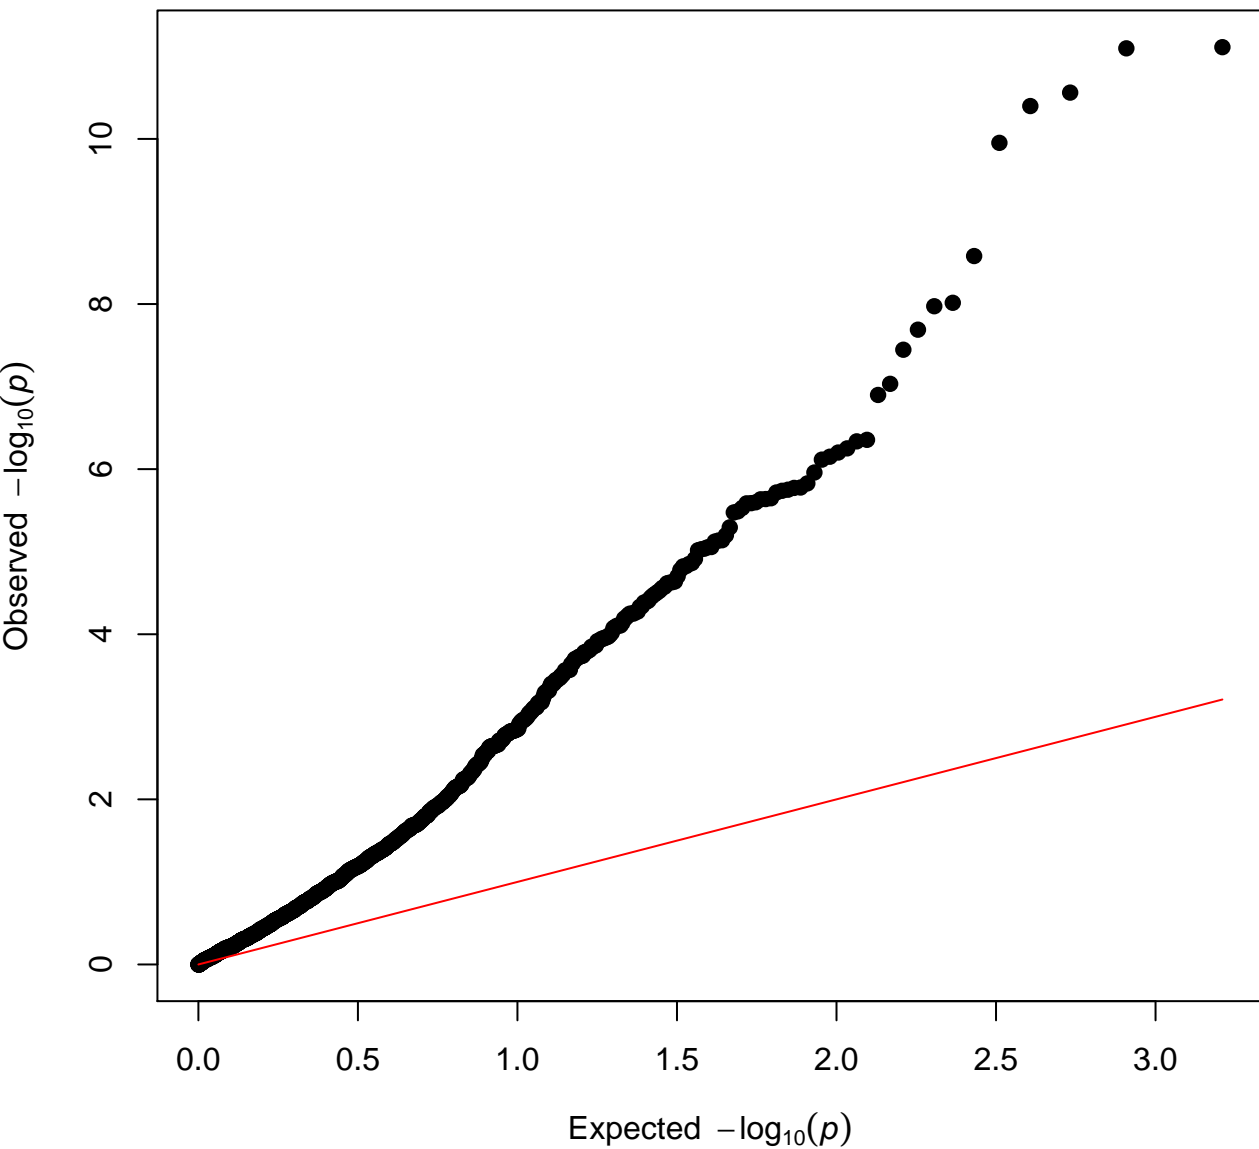



# LMM, X60\_FT.Duration.GH

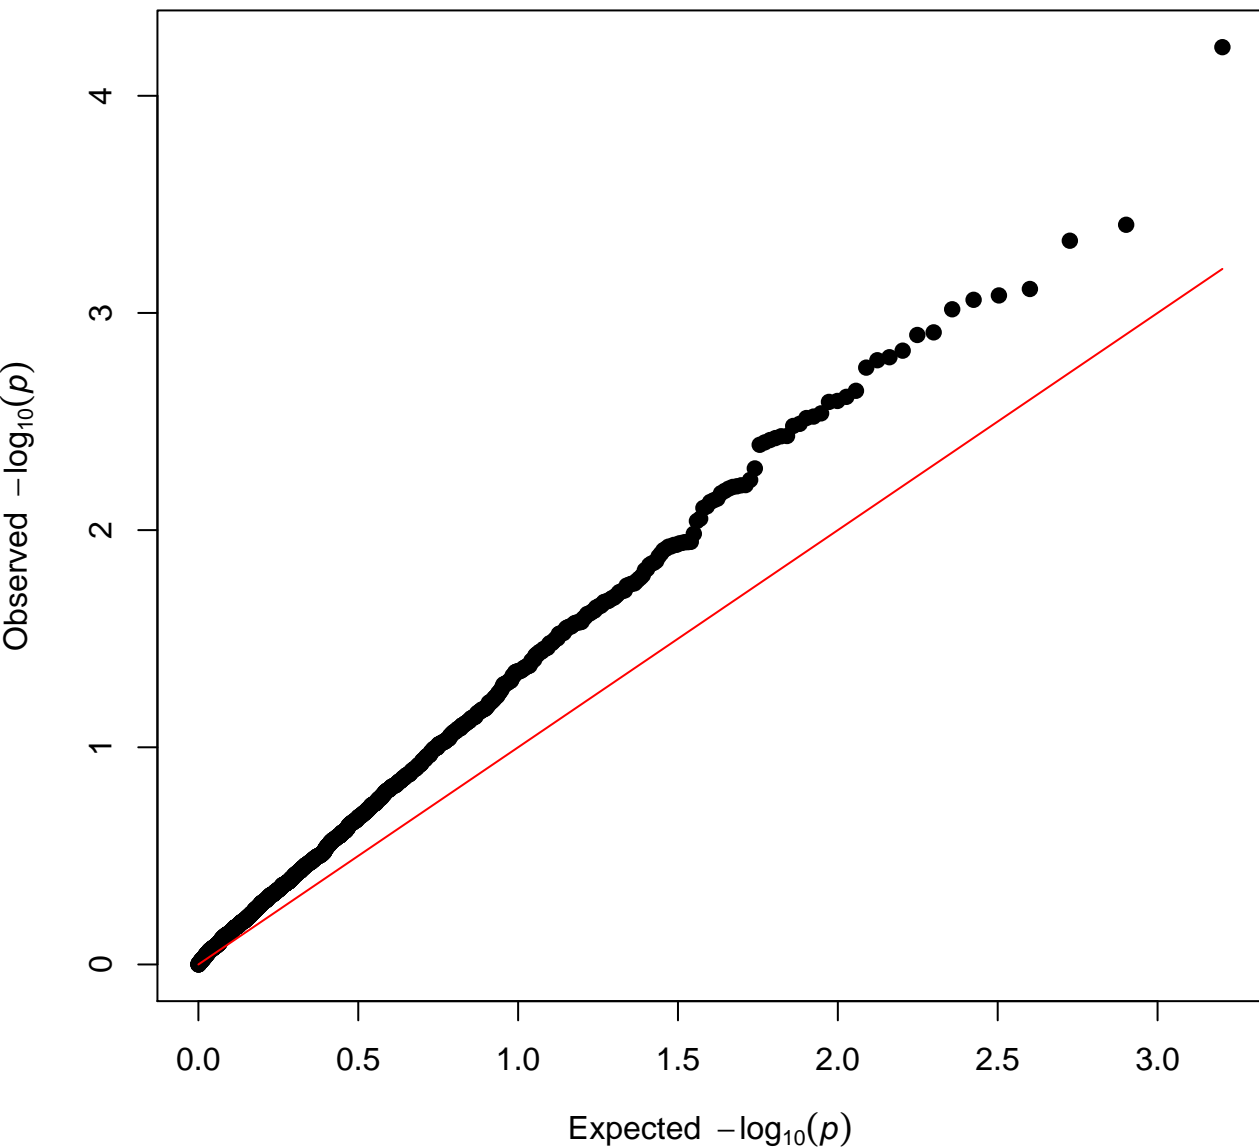

# LMM, X61\_LC.Duration.GH

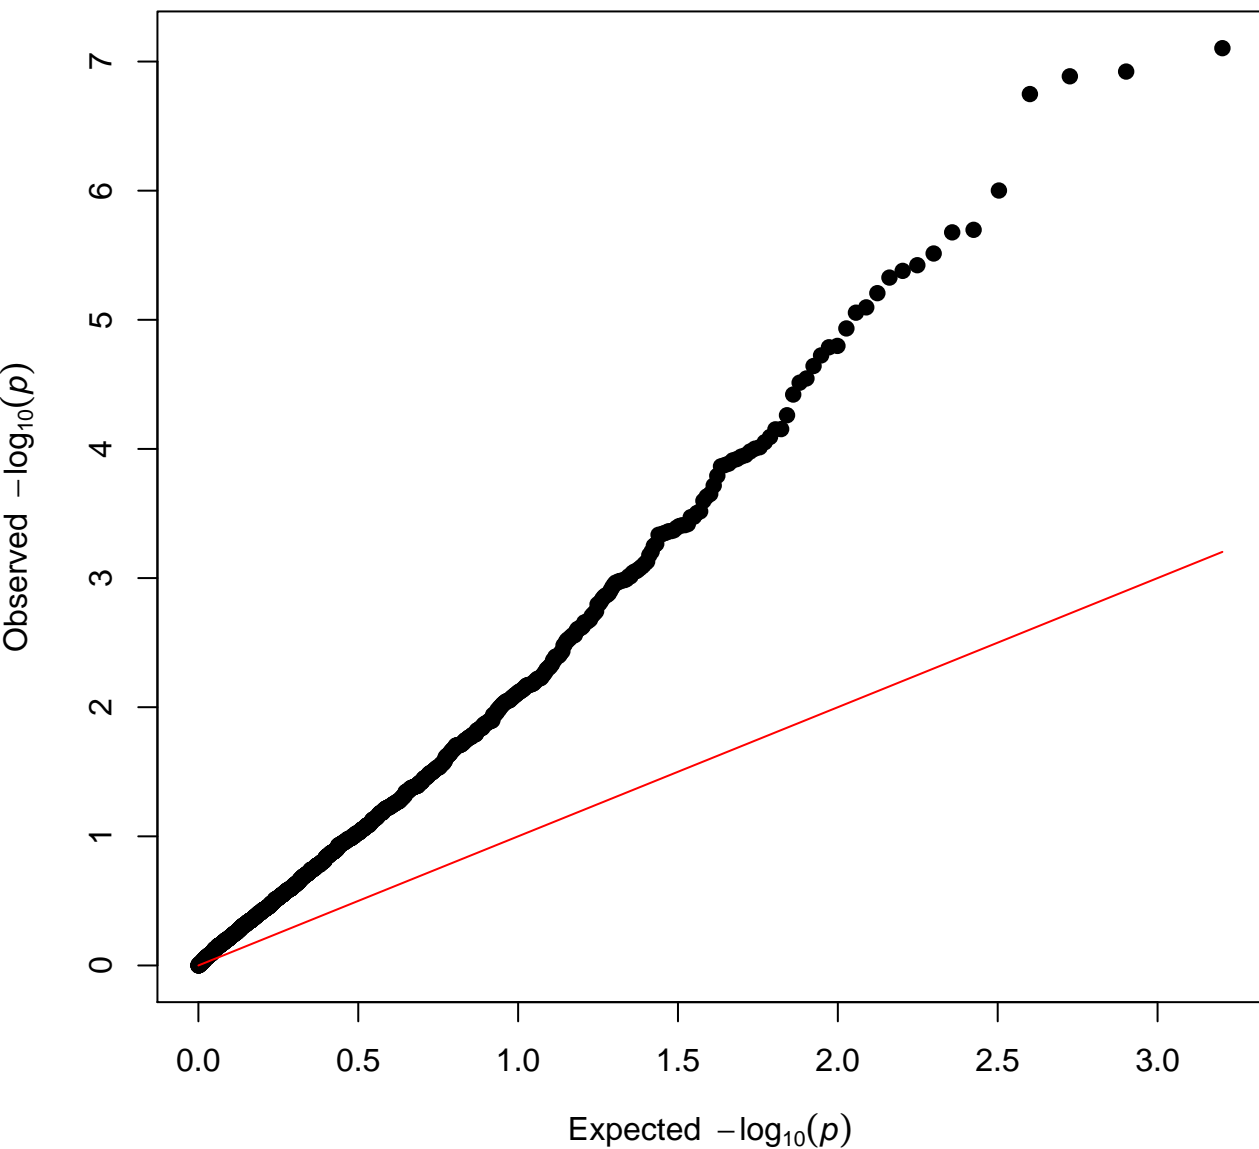

# LMM, X62\_LFS.GH

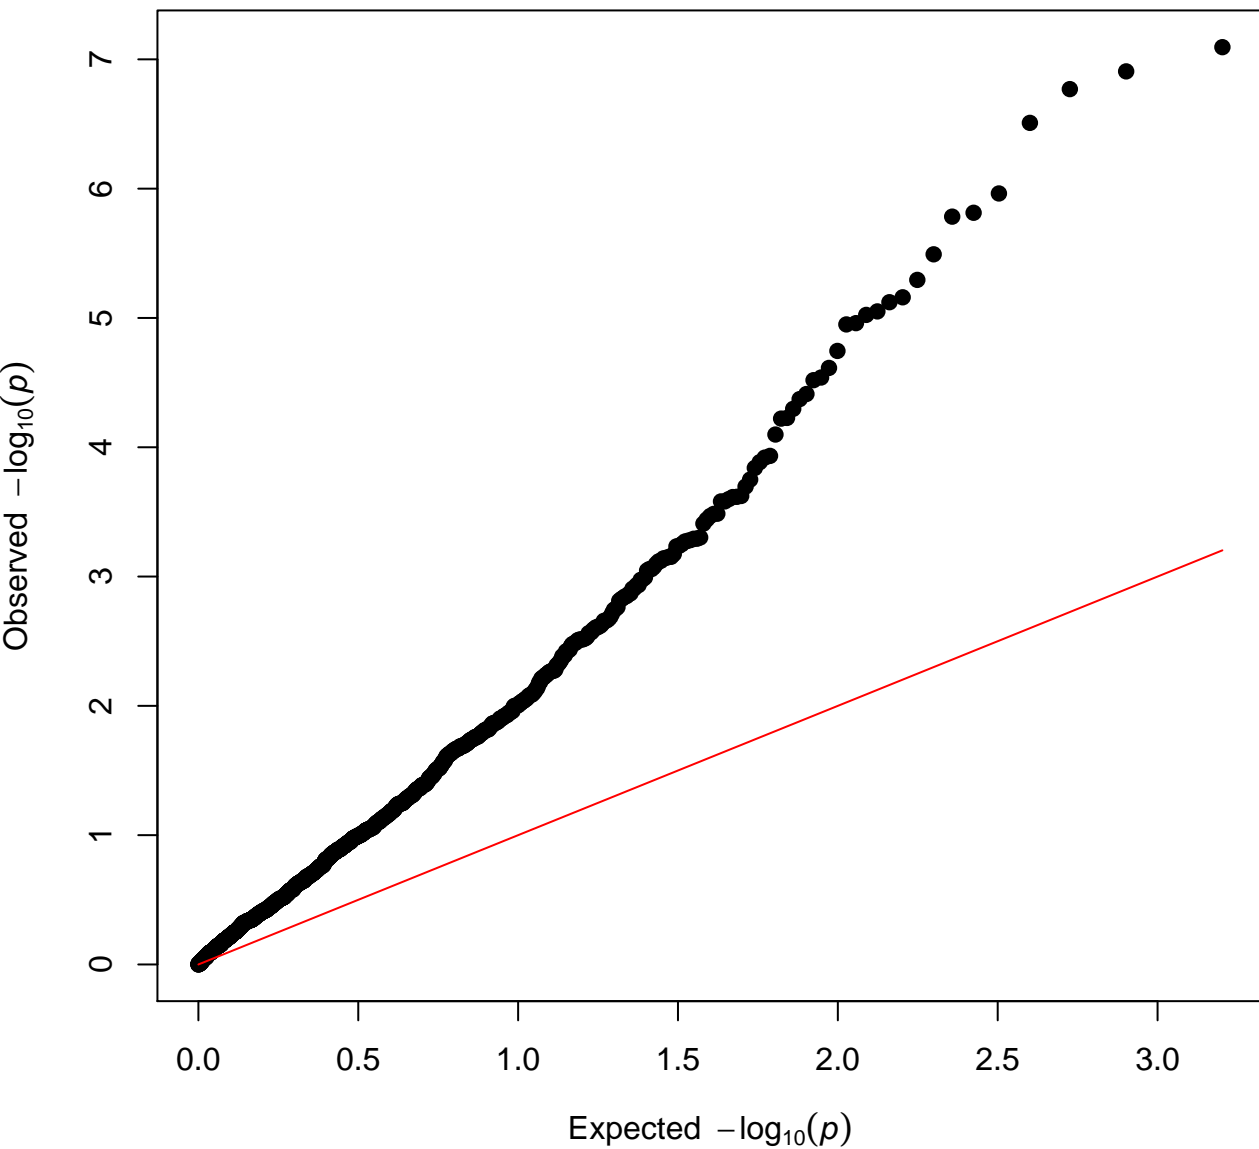

# LMM, X63\_MT.GH

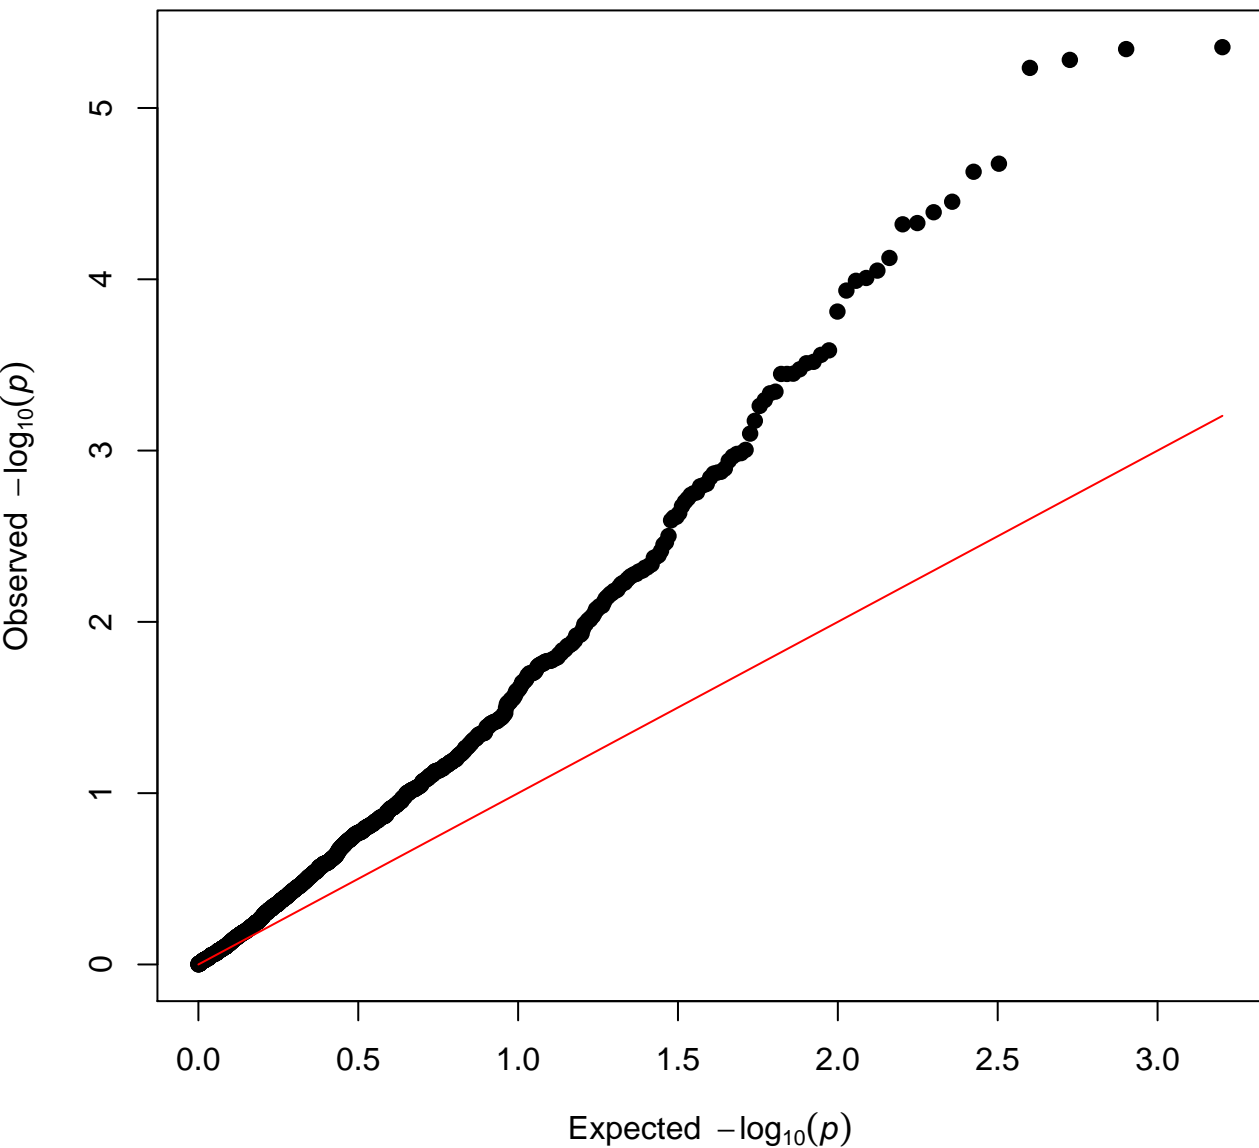

# LMM, X64\_RP.GH

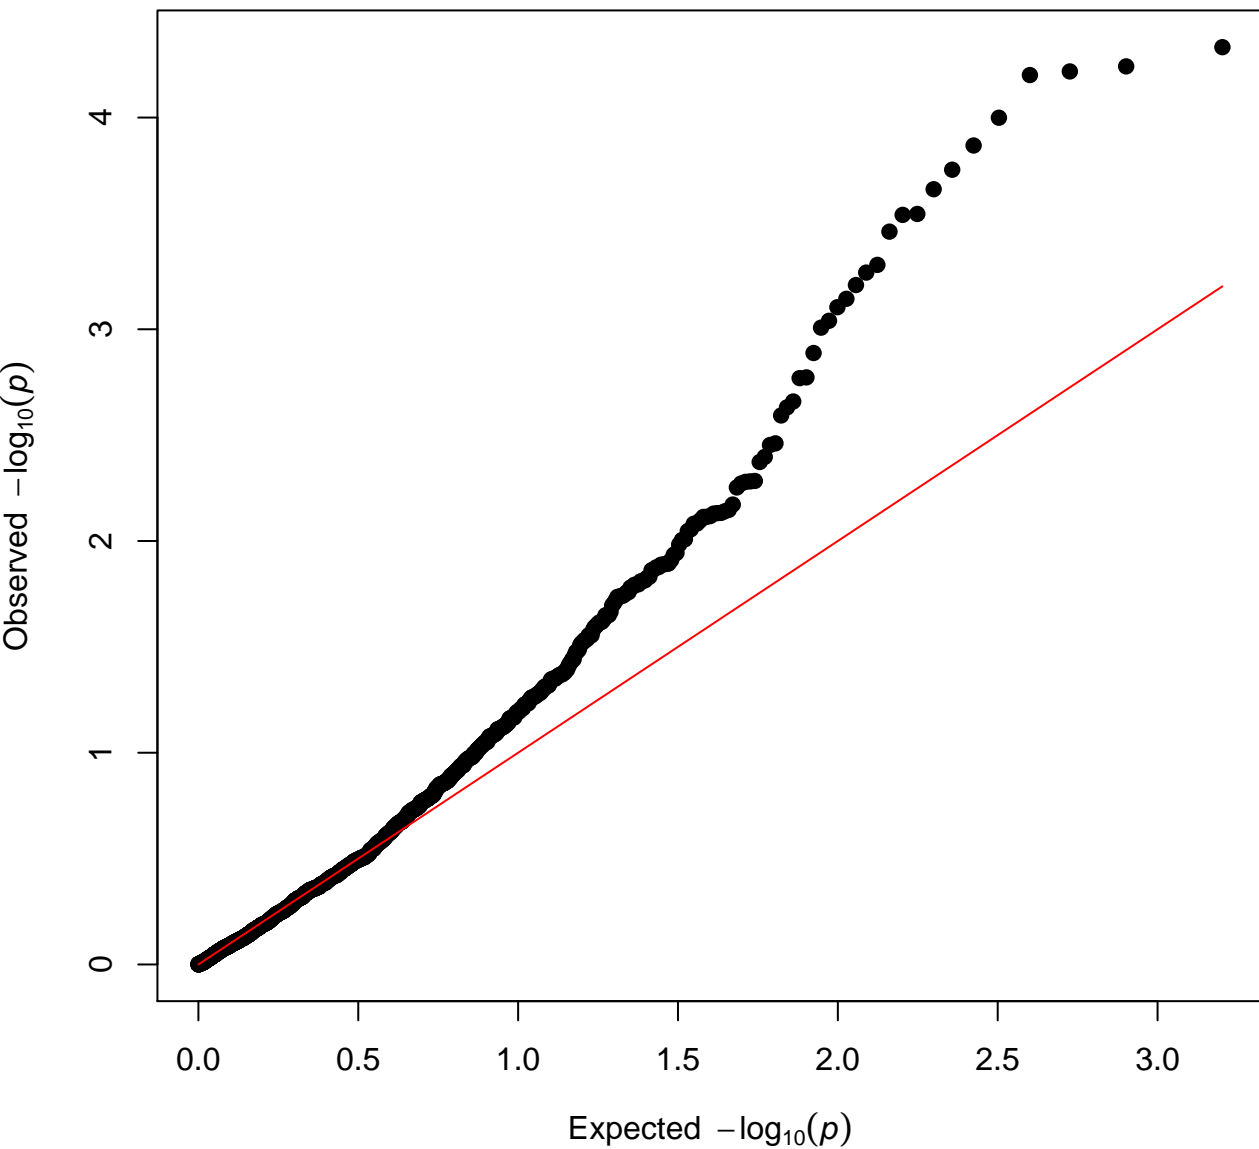

# LMM, X65\_At1

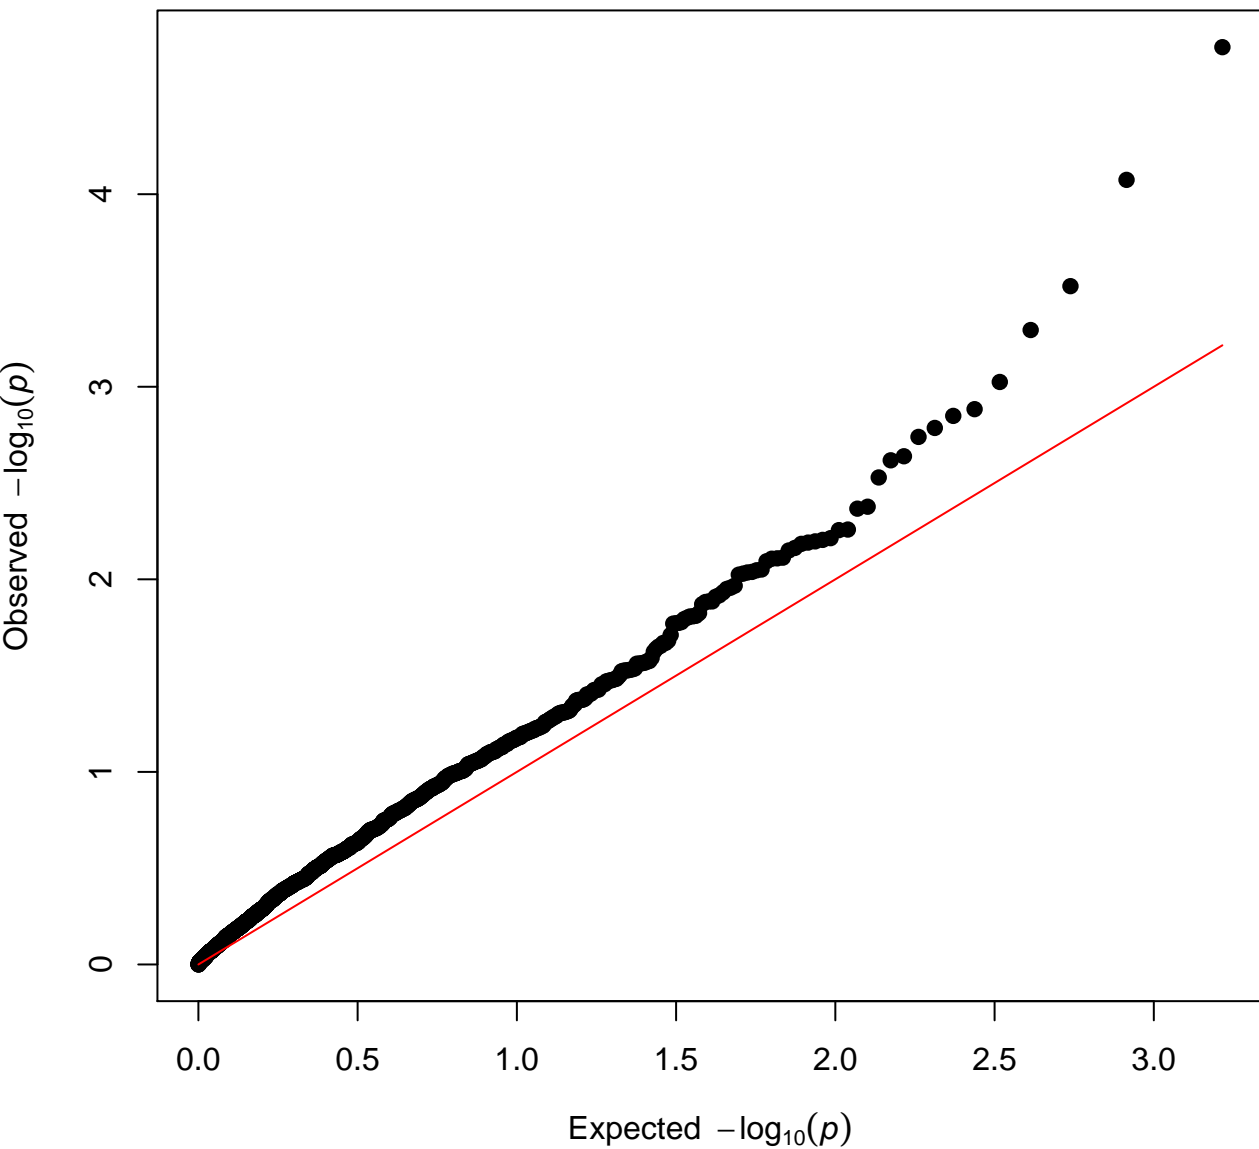

# LMM, X66\_At1.CFU2

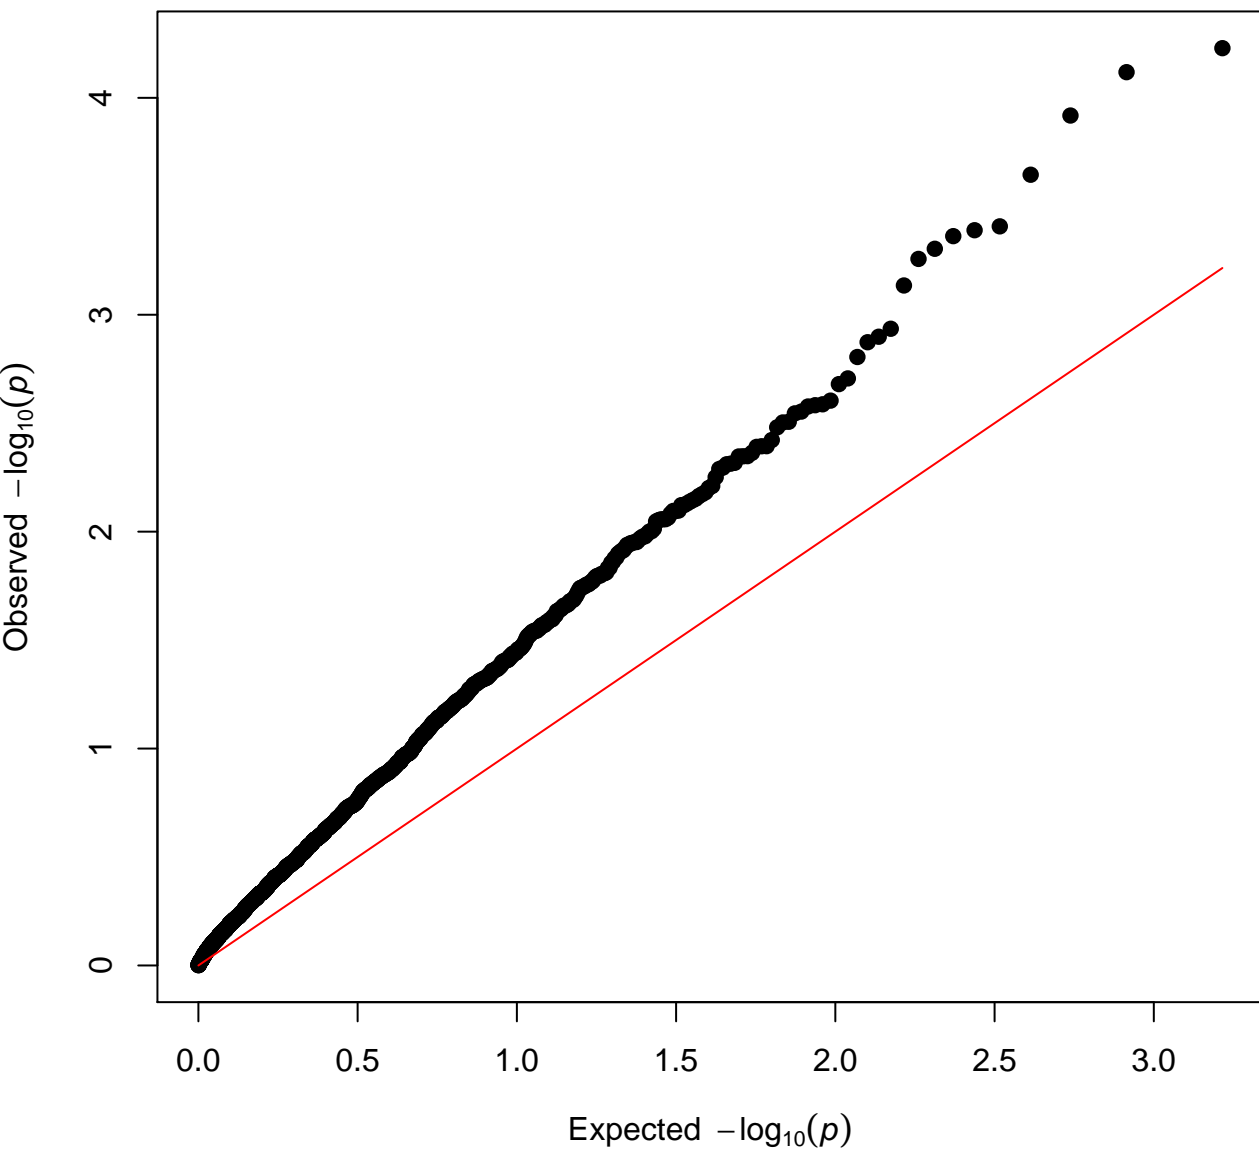

# LMM, X67\_As

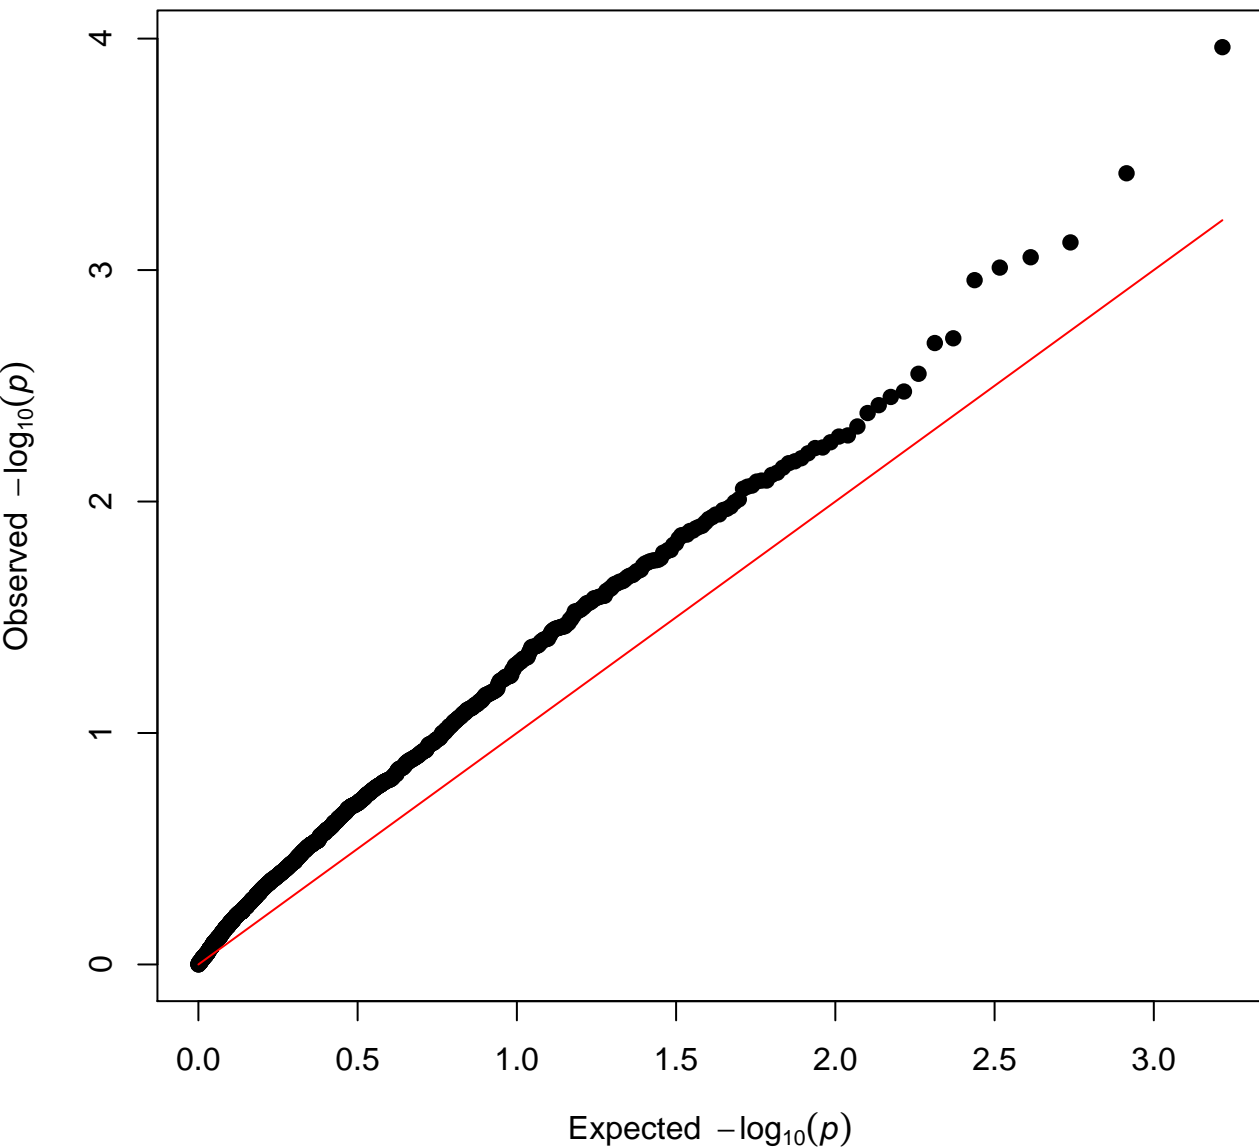



# LMM, X68\_As.CFU2

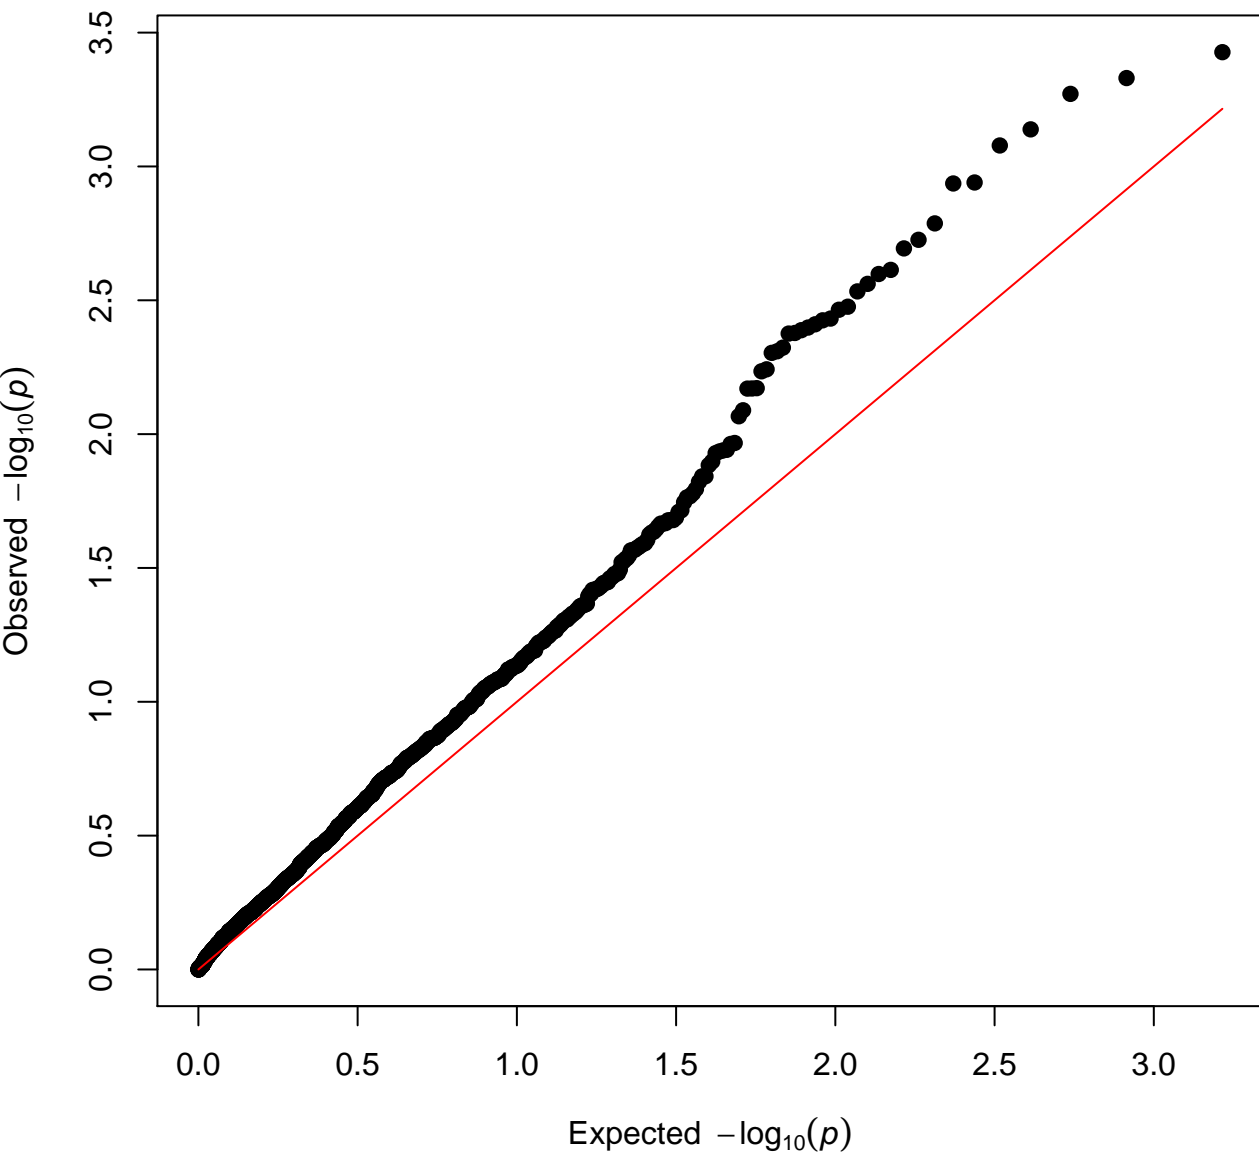

# LMM, X69\_Bs

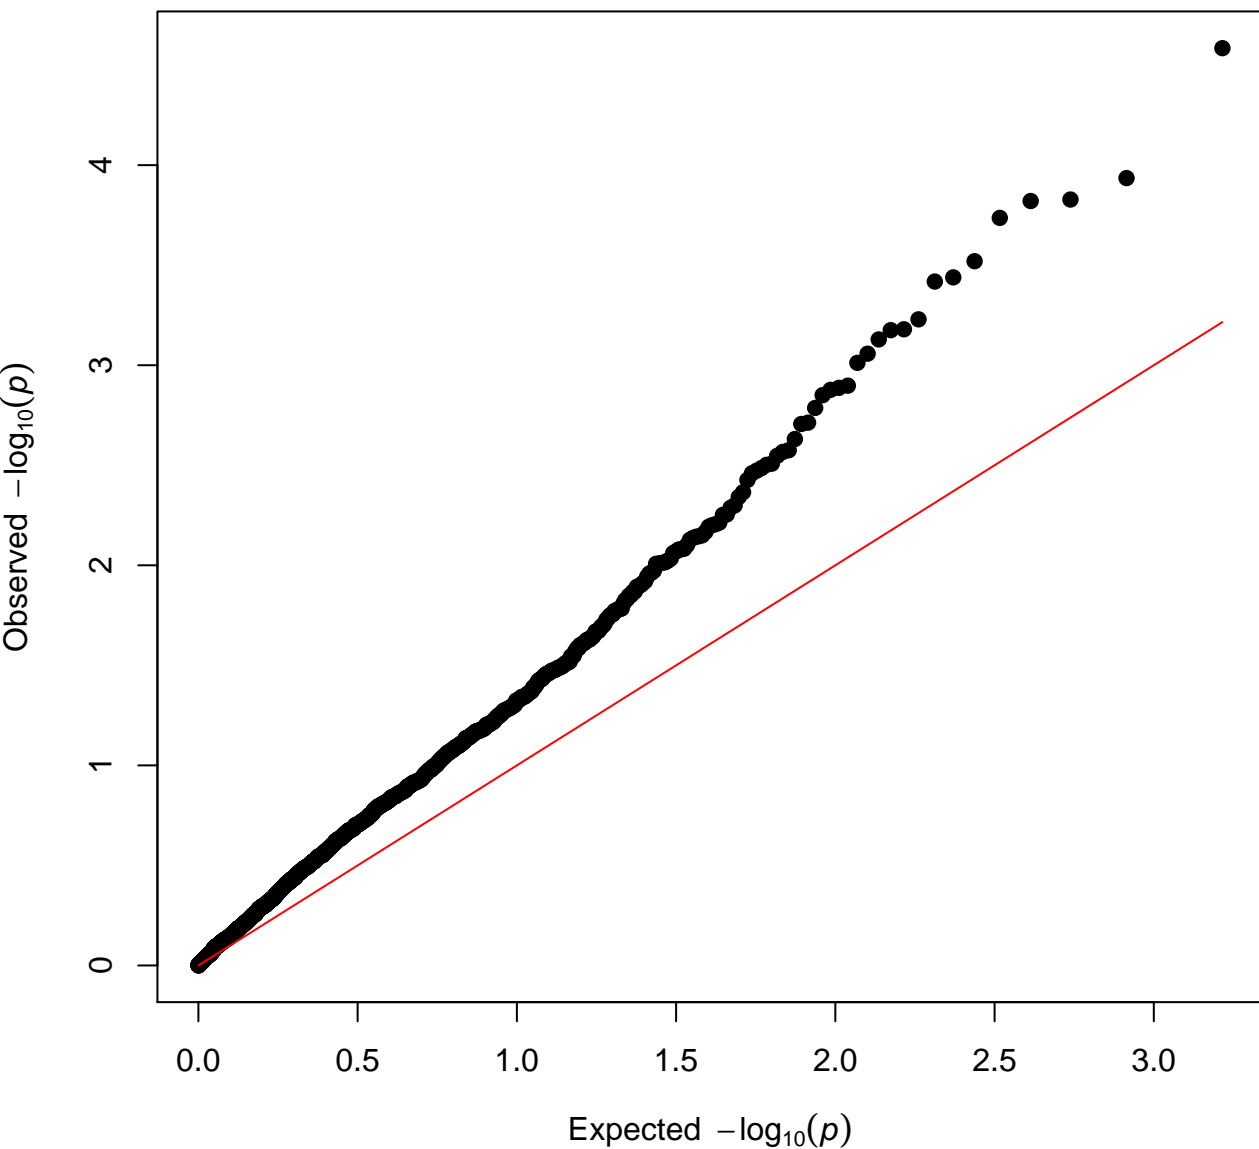

# LMM, X70\_Bs.CFU2

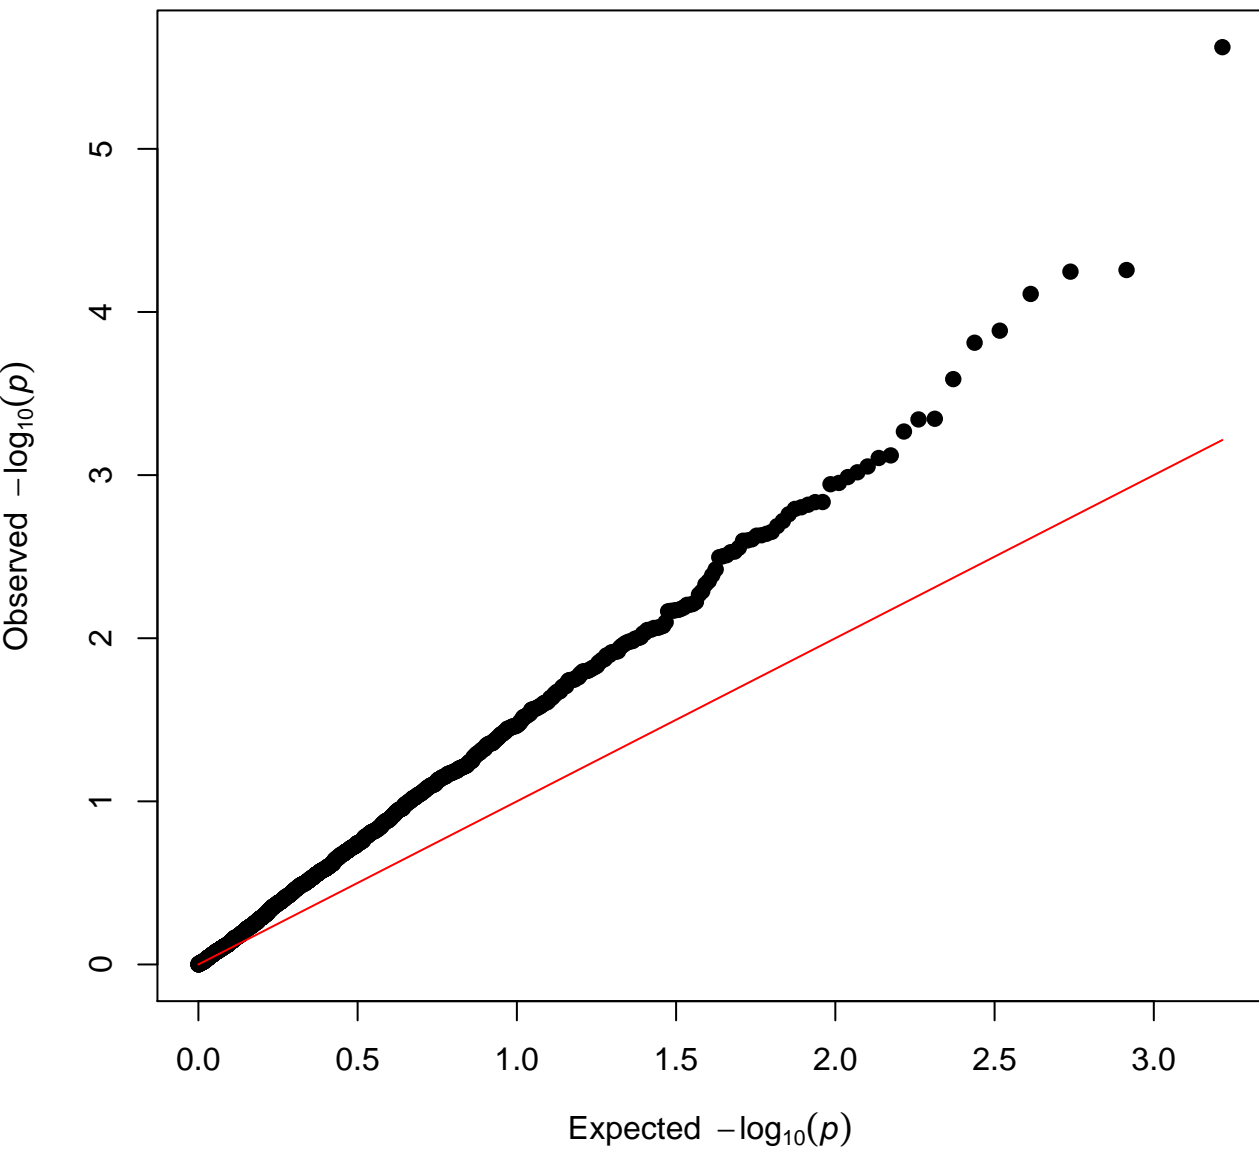

# LMM, X71\_At2

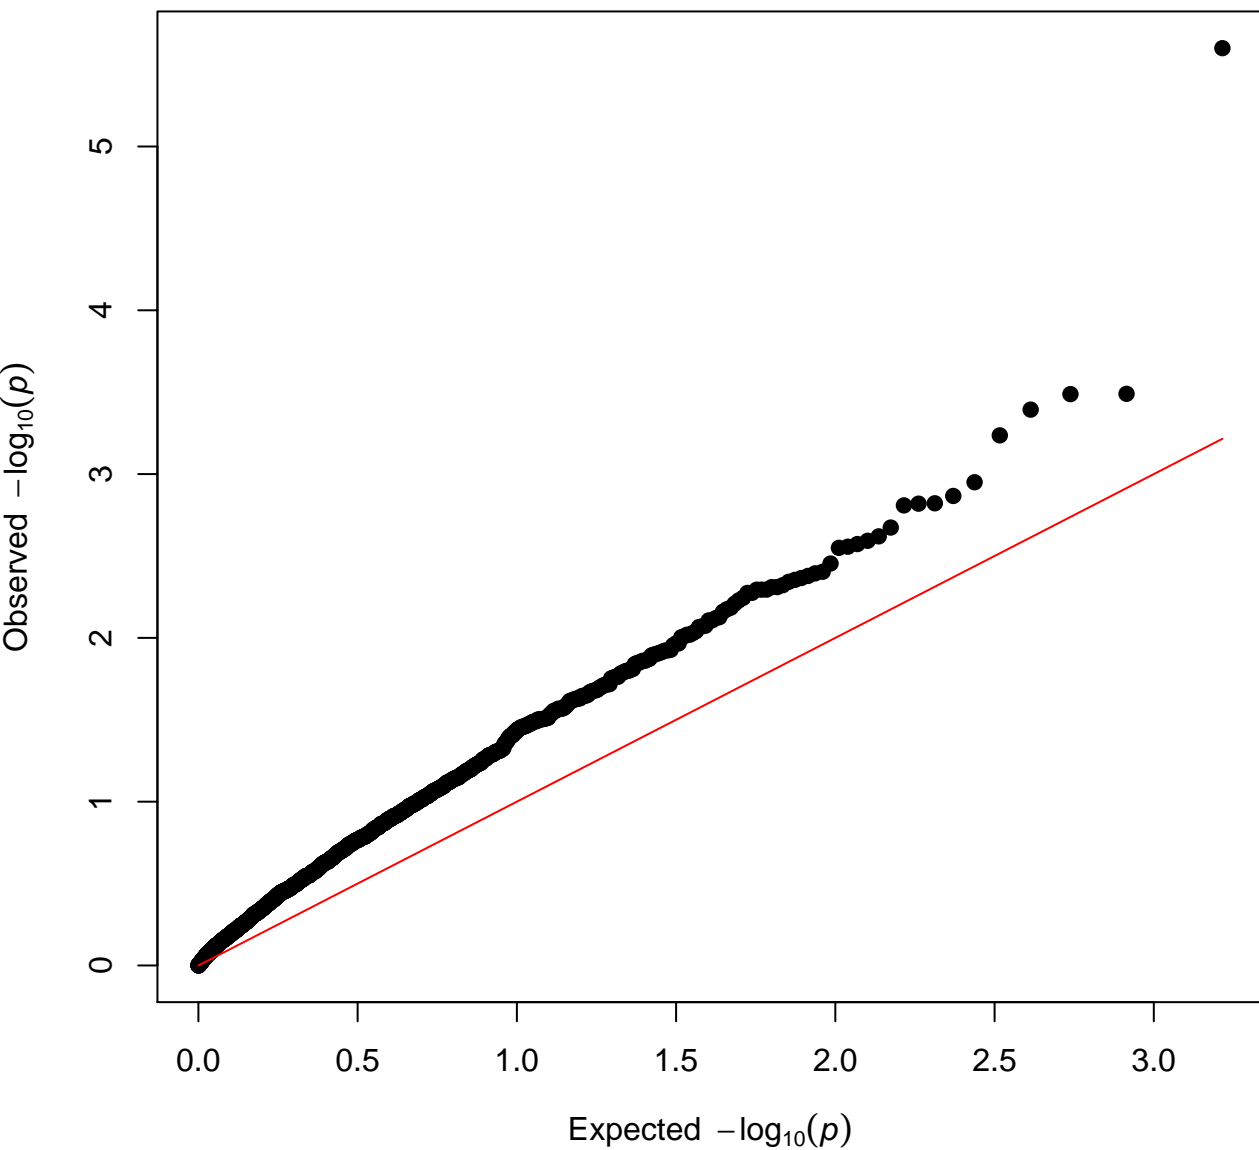

# LMM, X72\_At2.CFU2

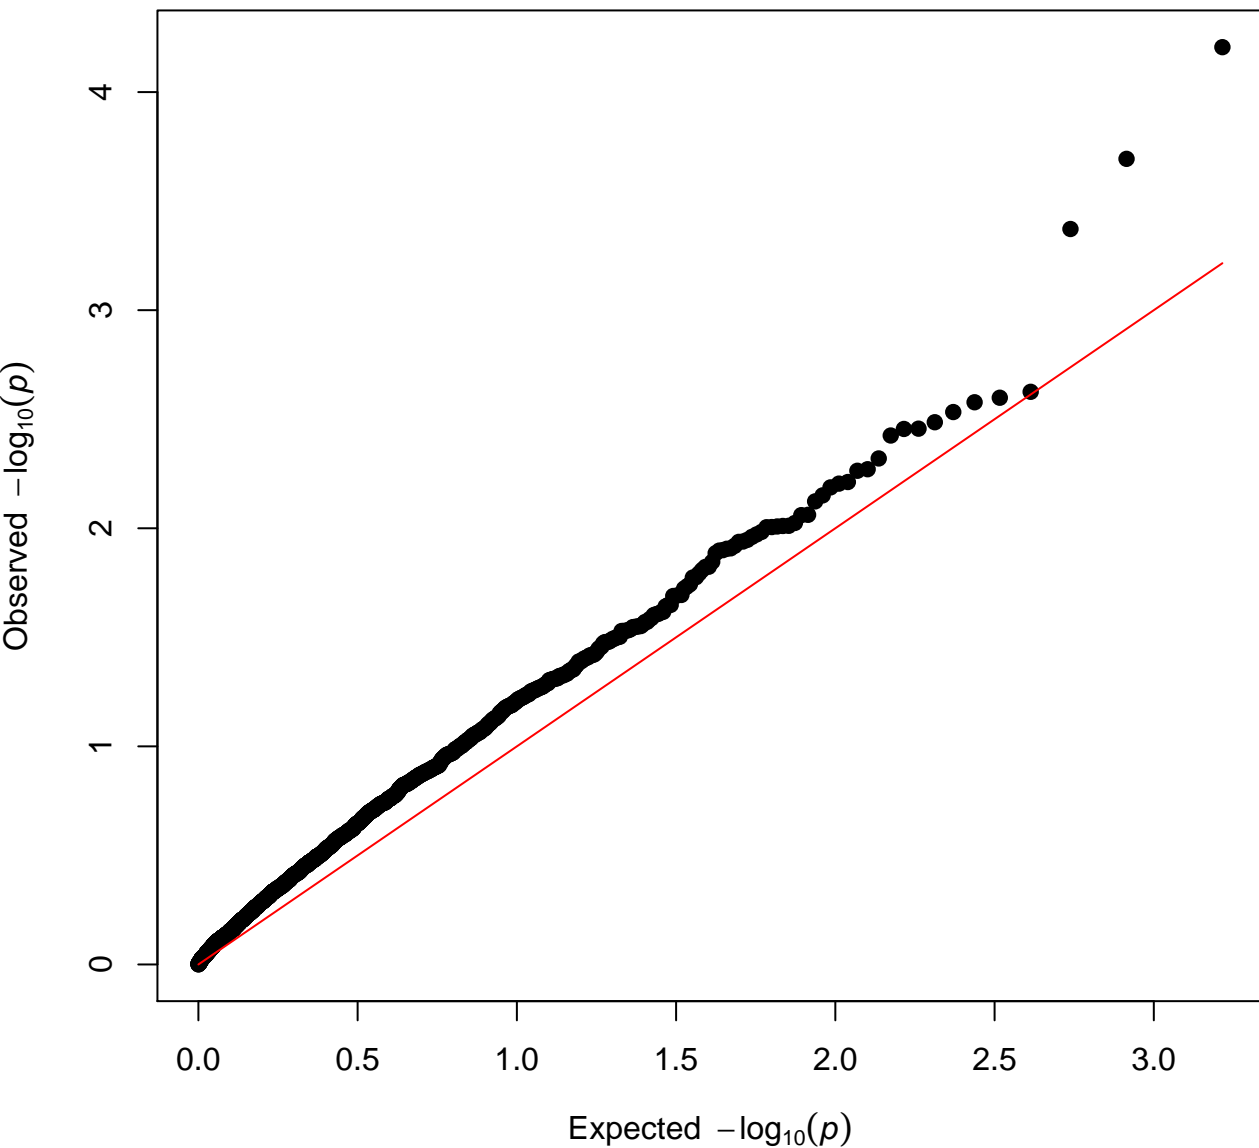

# LMM, X73\_As2

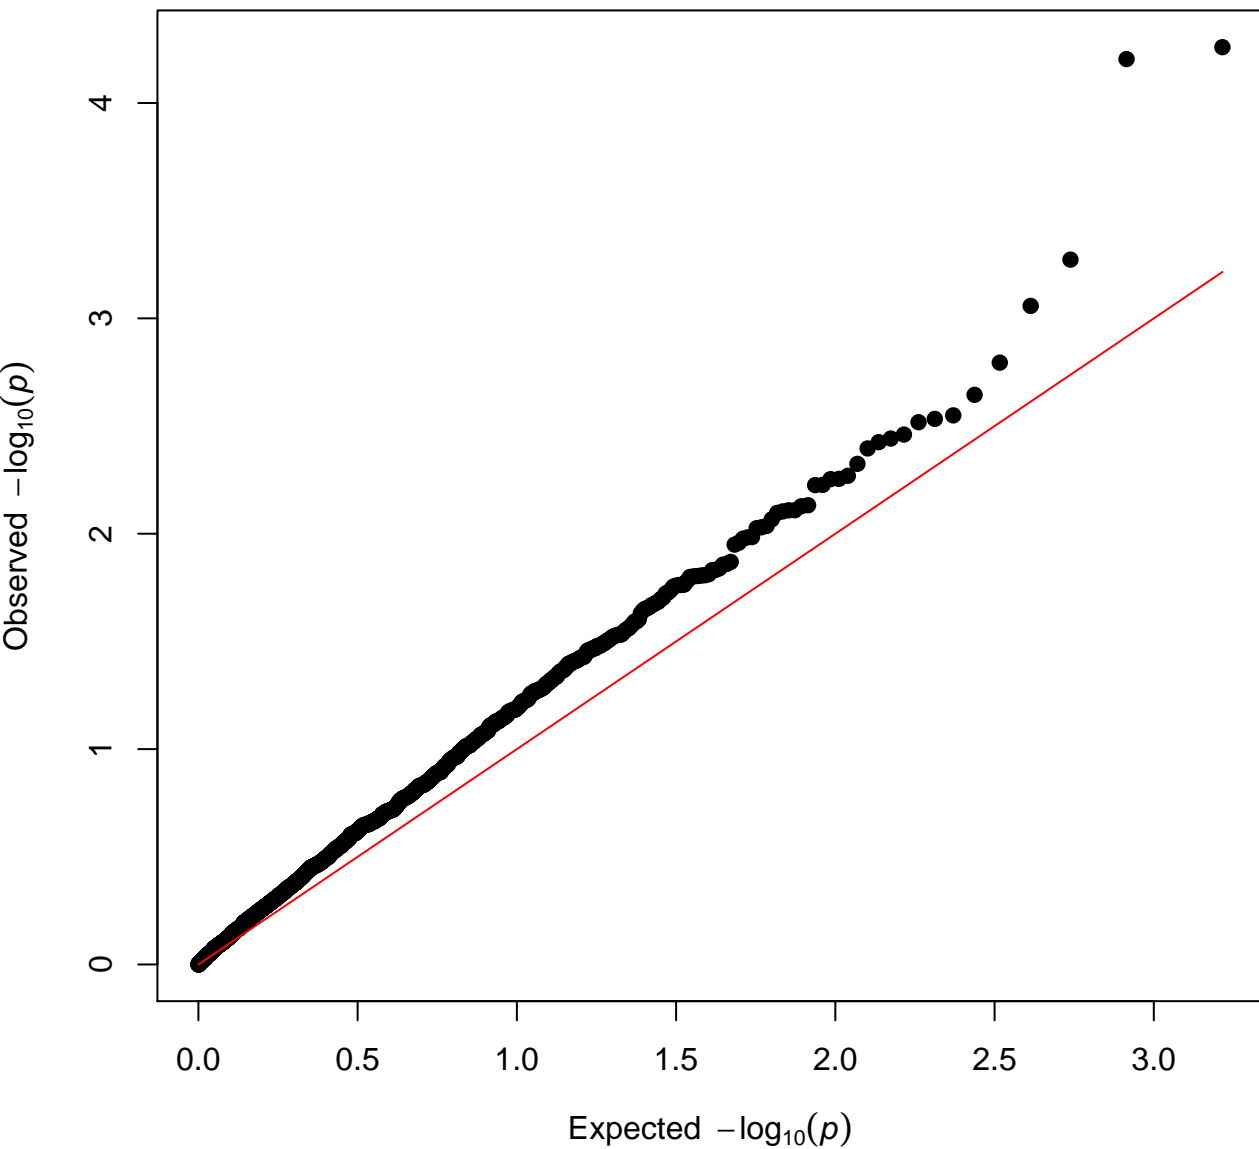

# LMM, X74\_As2.CFU2

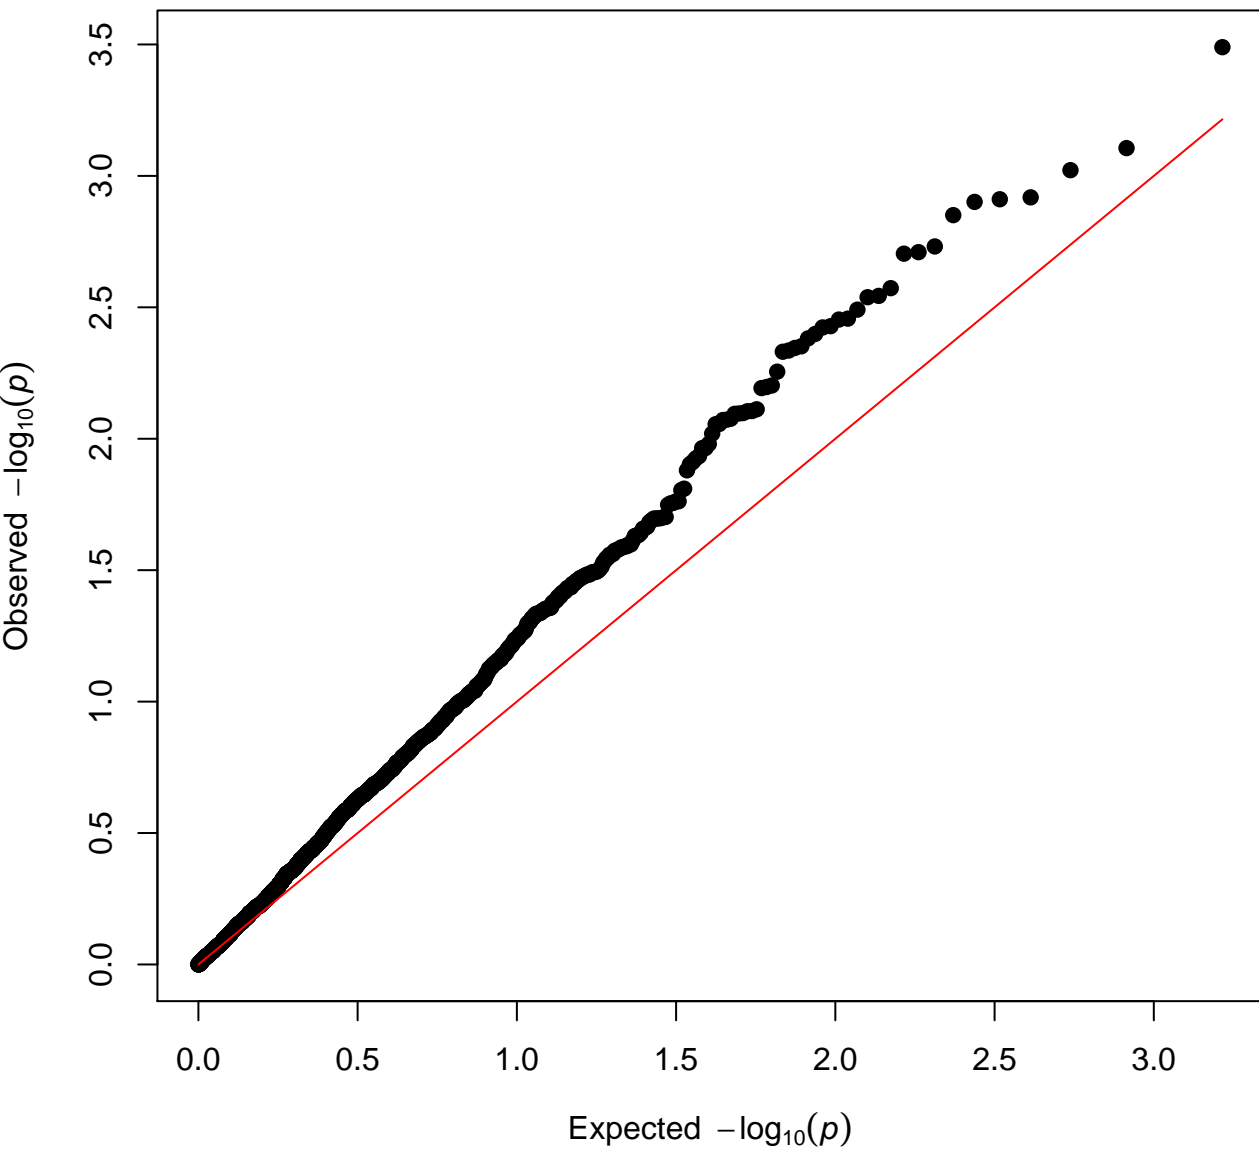

# LMM, X75\_FW

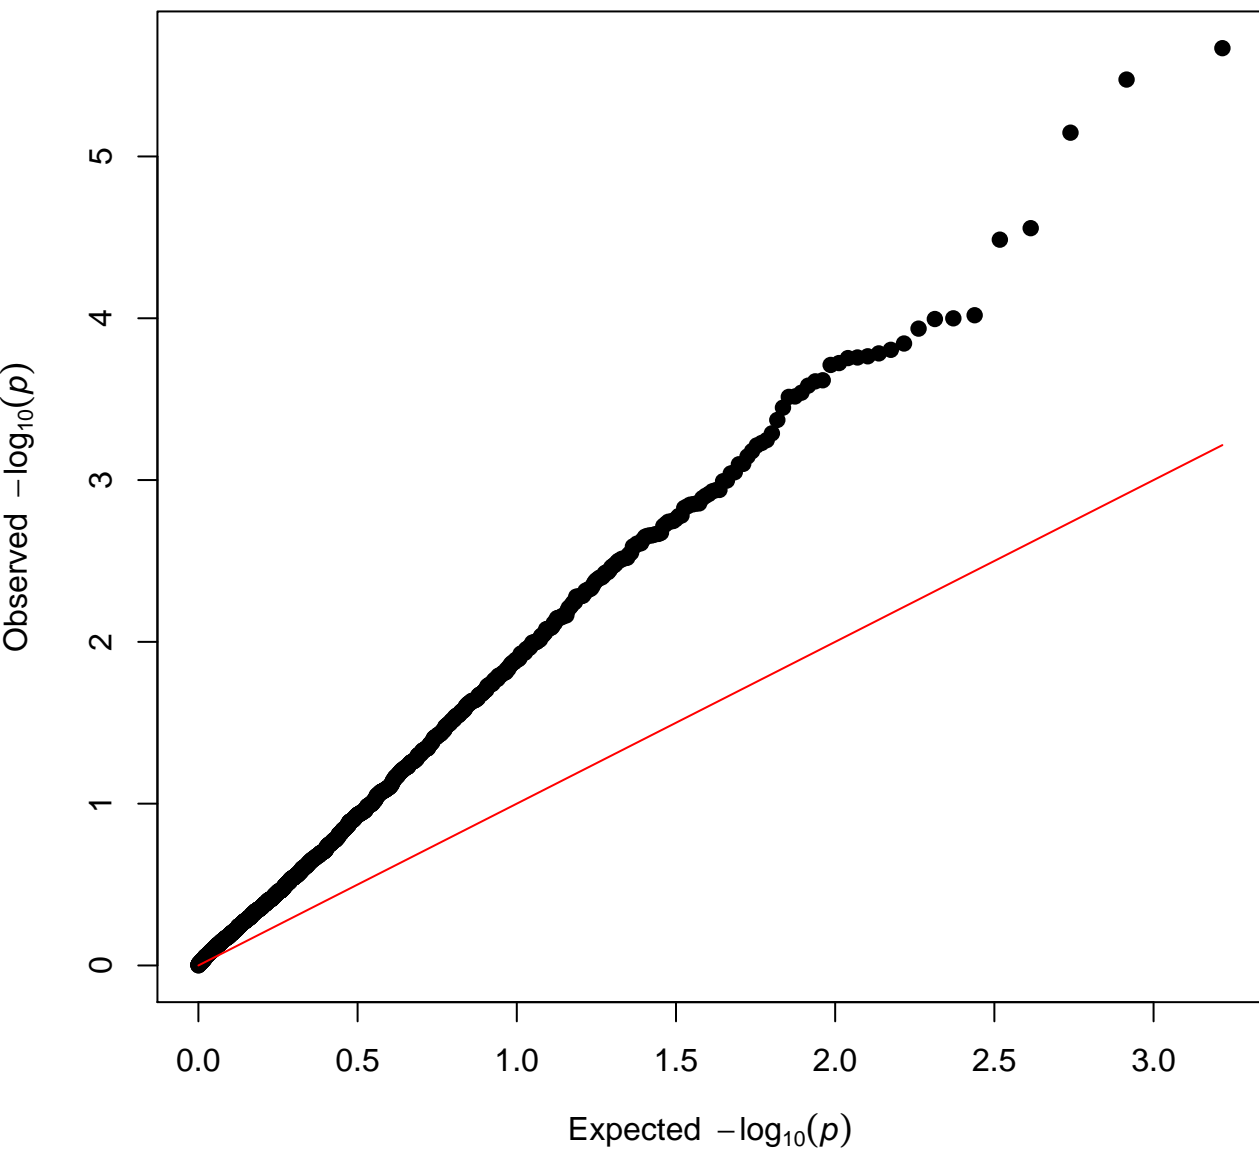



# LMM, X76\_DW

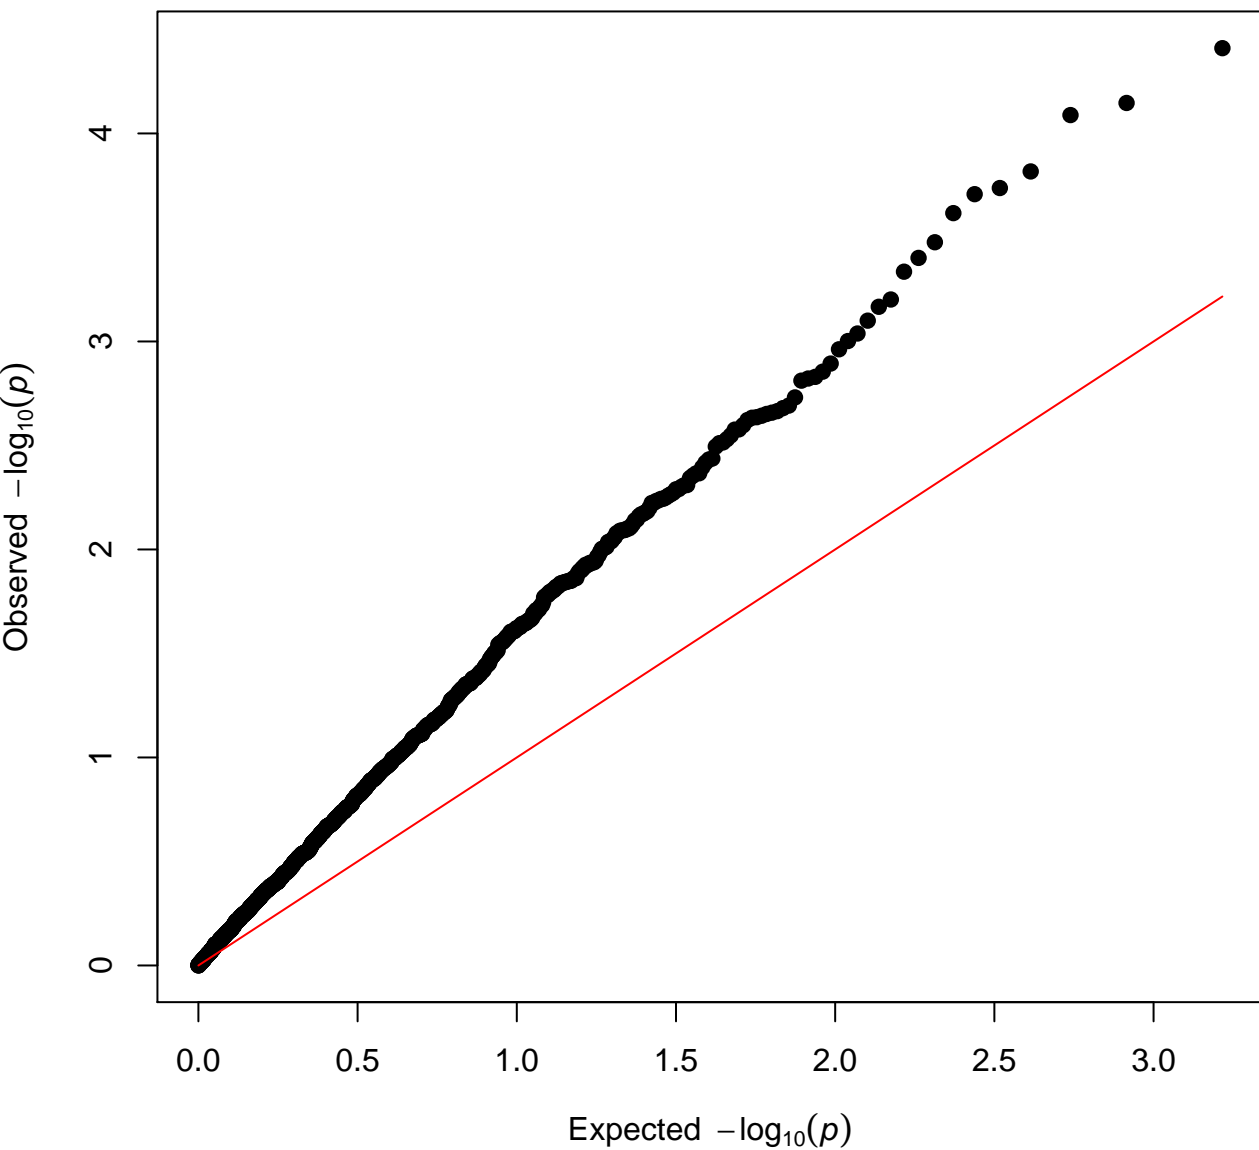

# LMM, X77\_LES

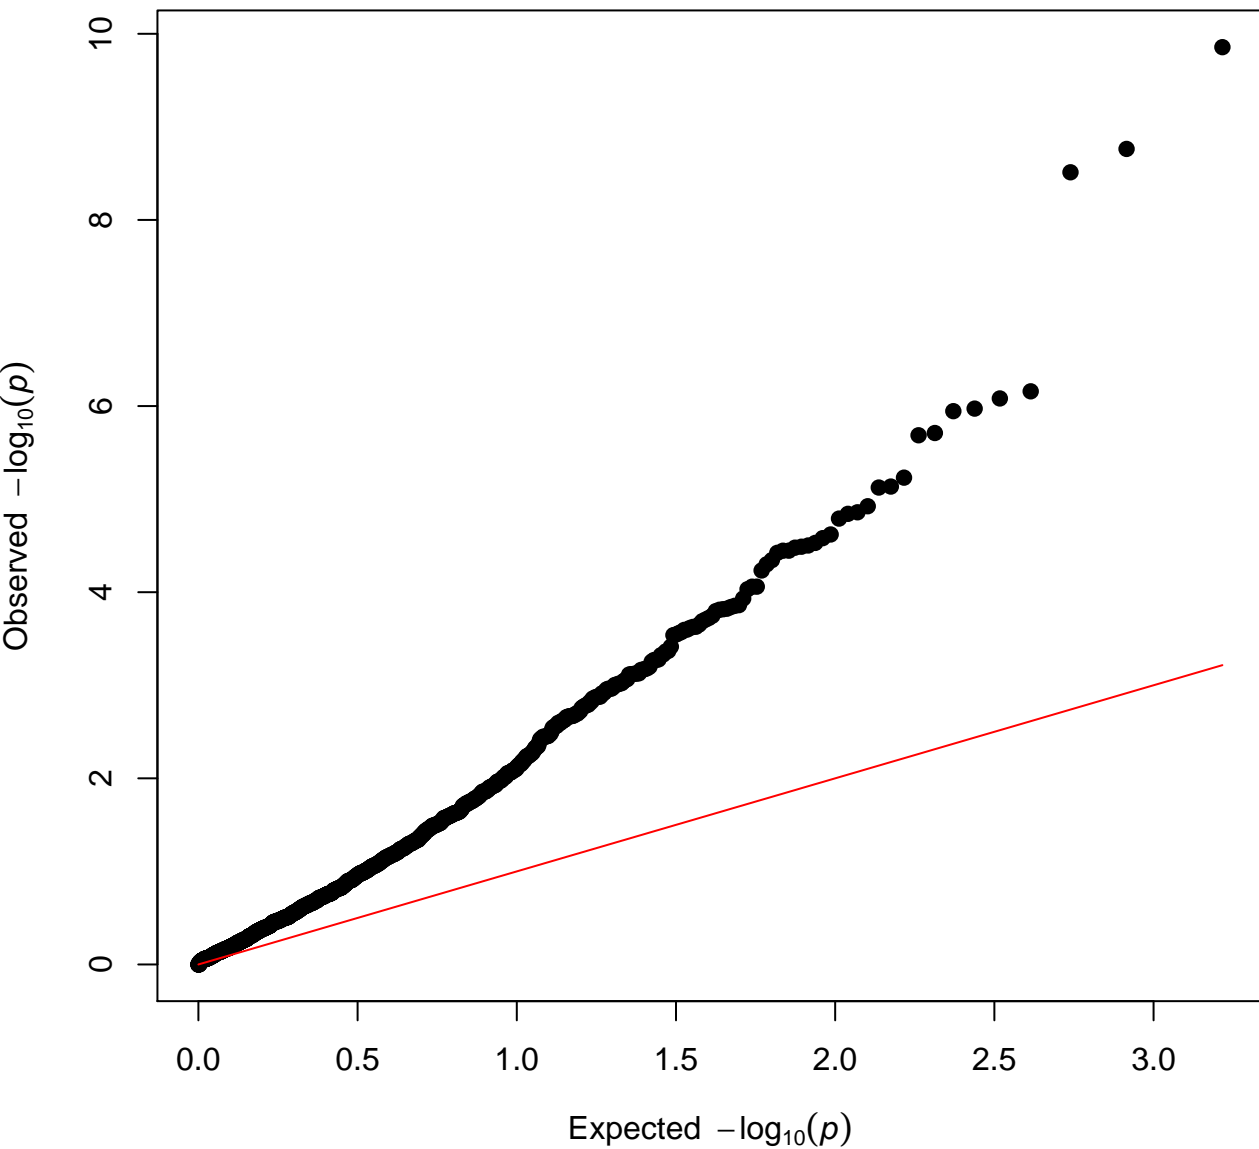

# LMM, X79\_LY

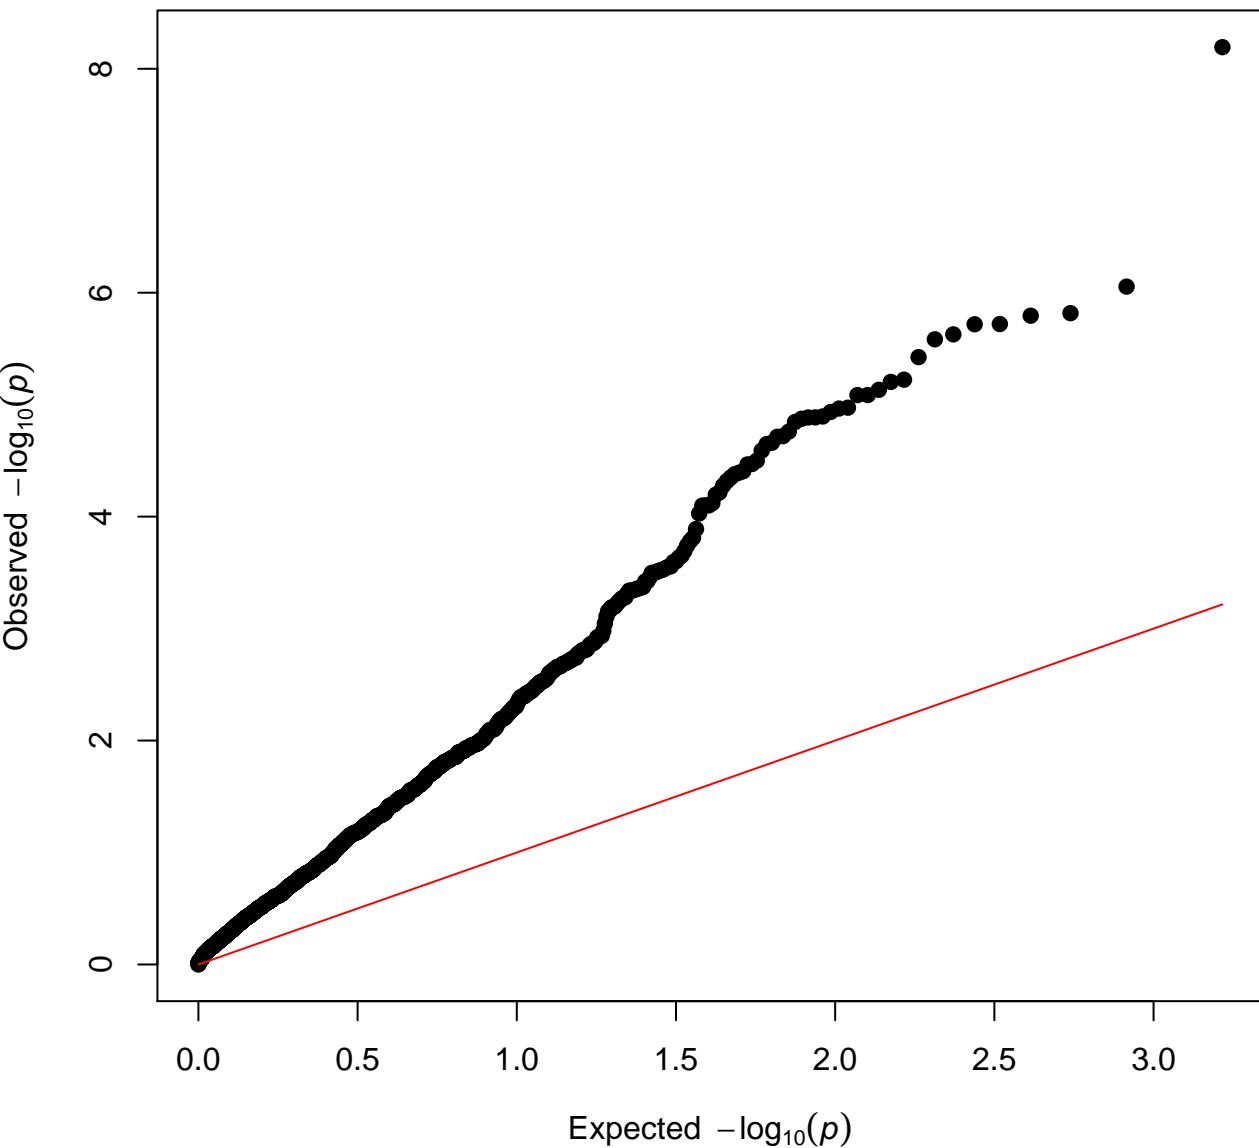

# LMM, X80\_LN10

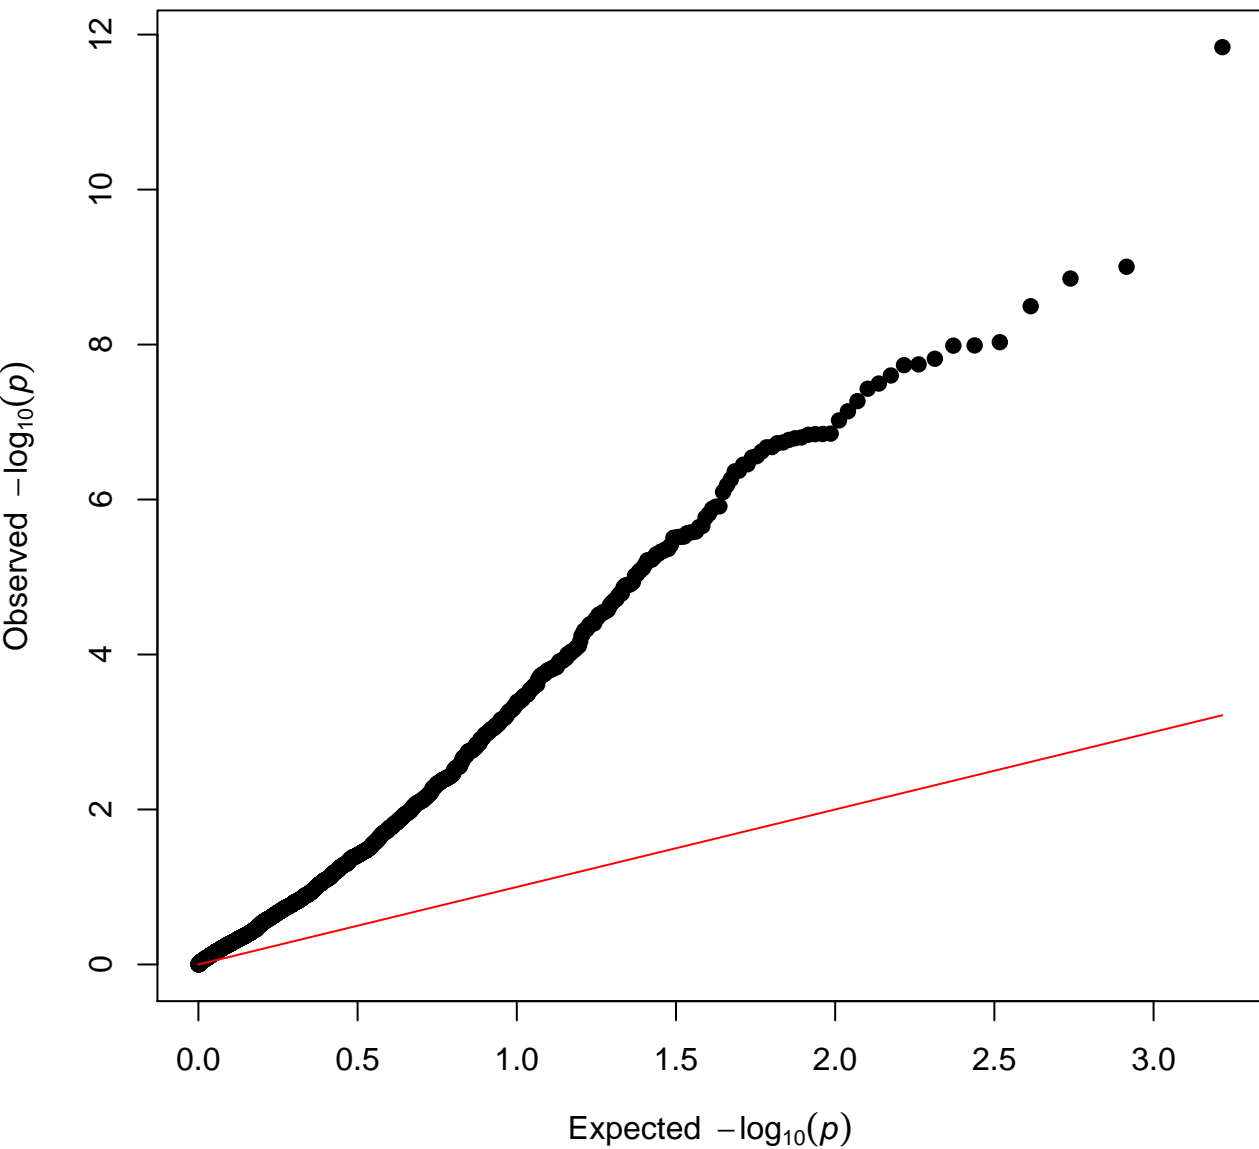

# LMM, X81\_LN16

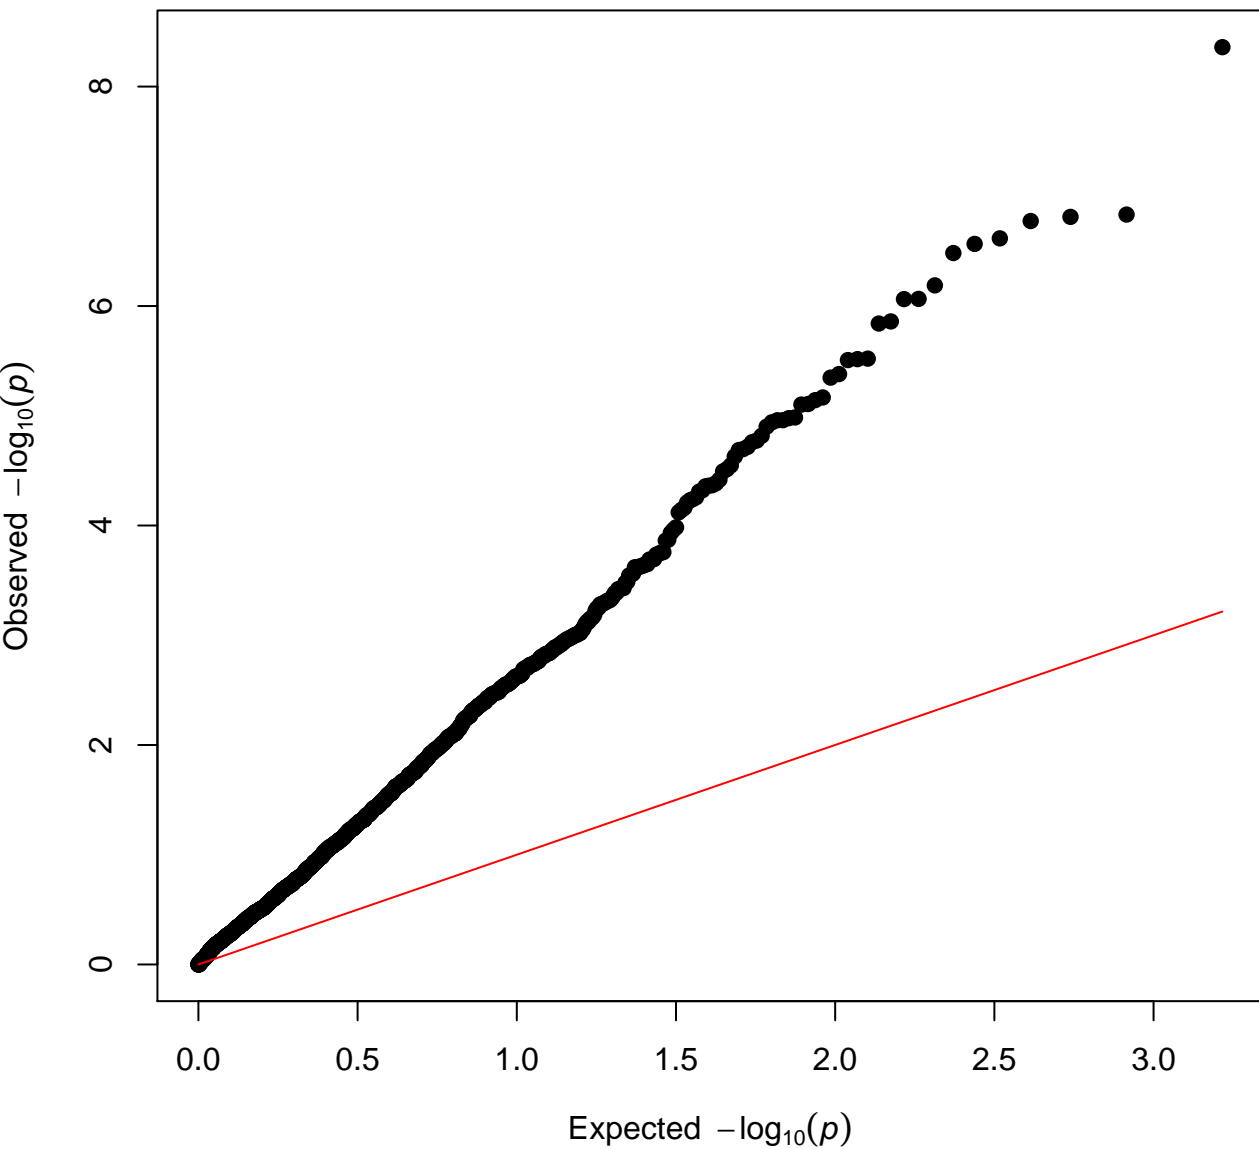

# LMM, X82\_LN22

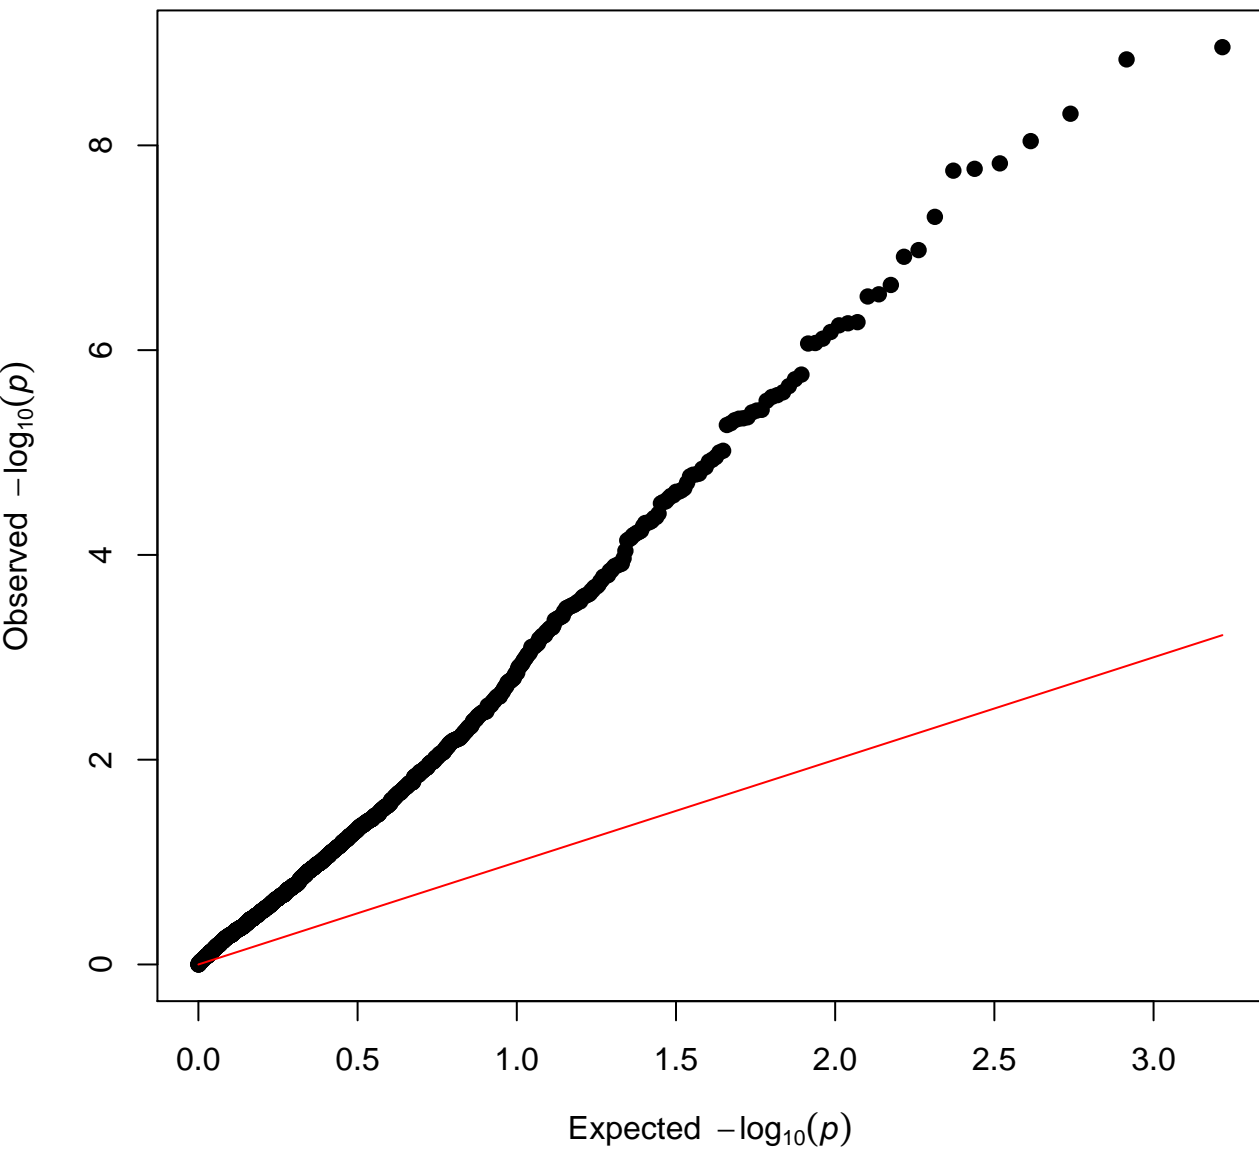

# LMM, X158\_Silique.16

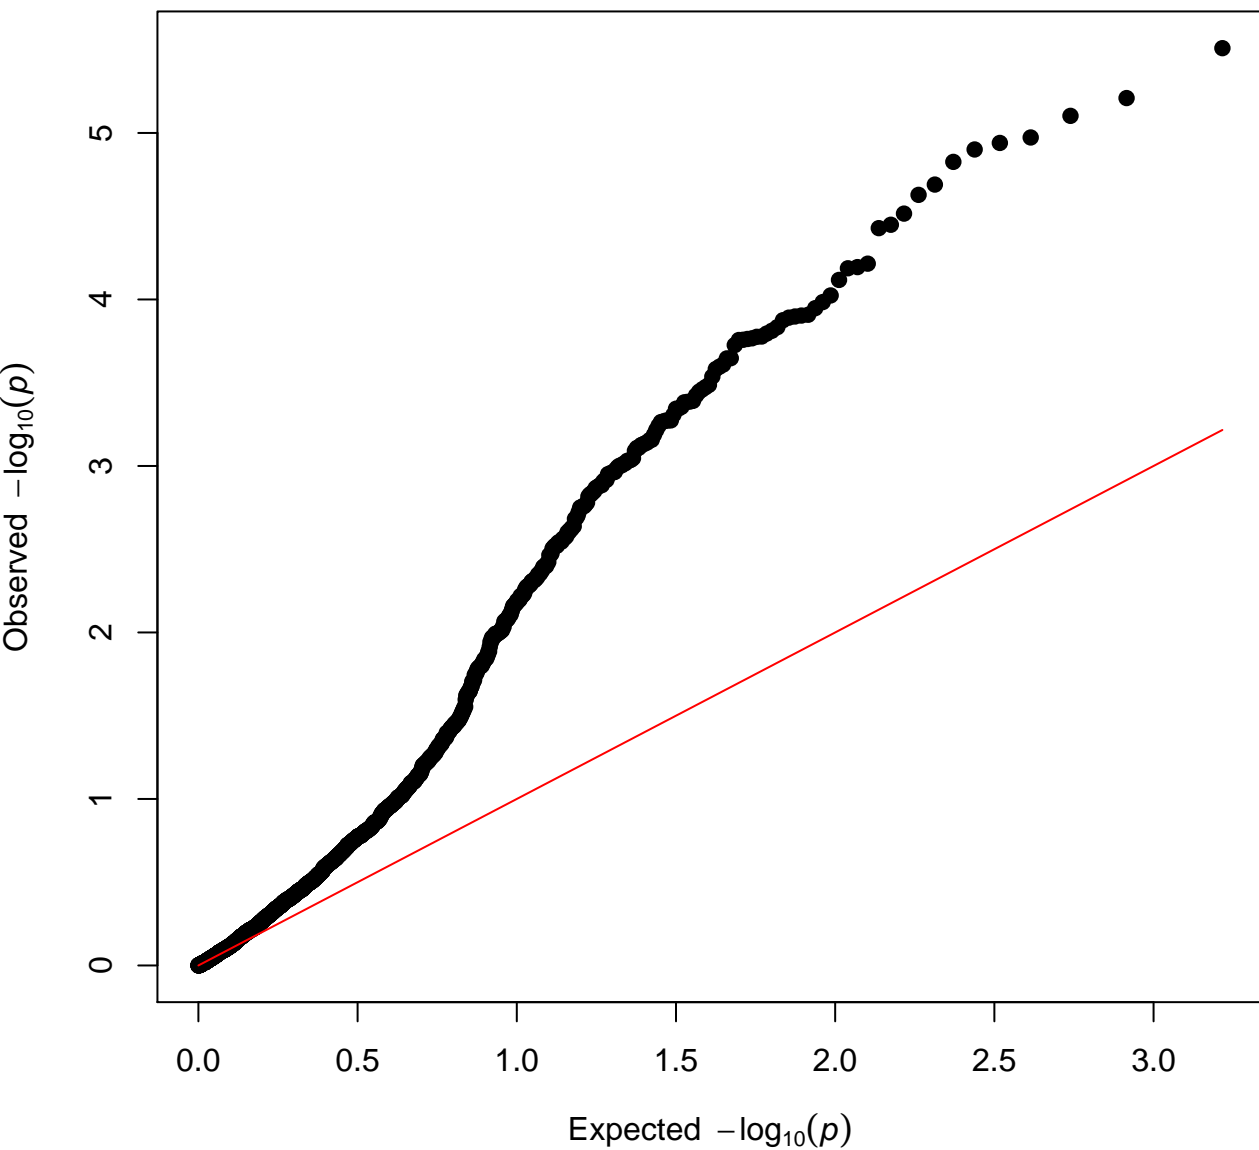

# LMM, X161\_Germ.10

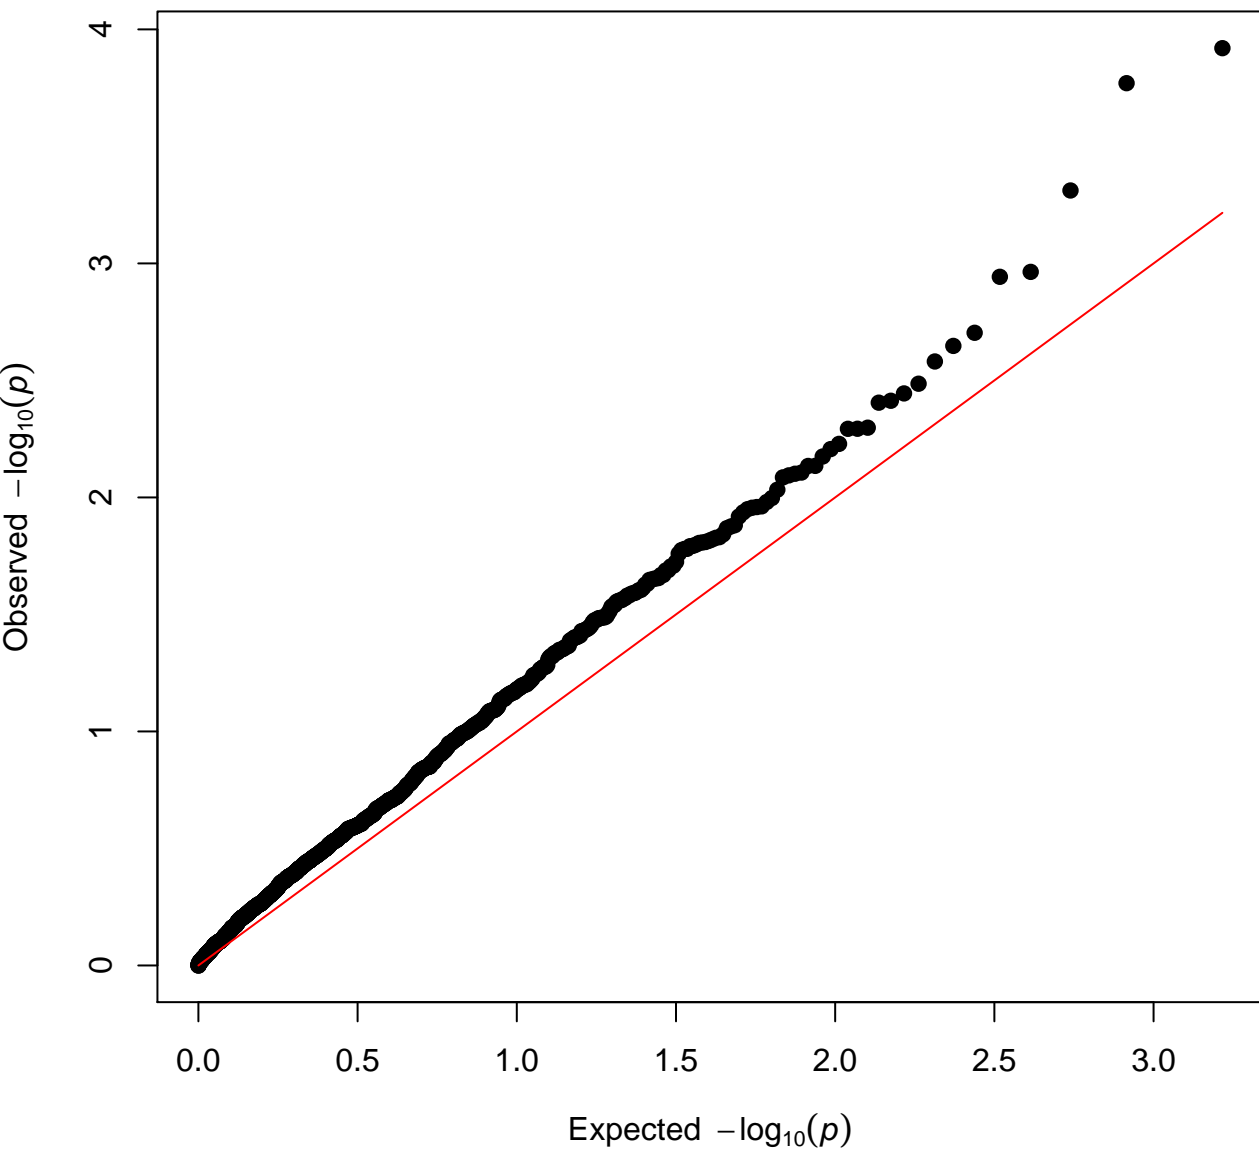



# LMM, X162\_Germ.16

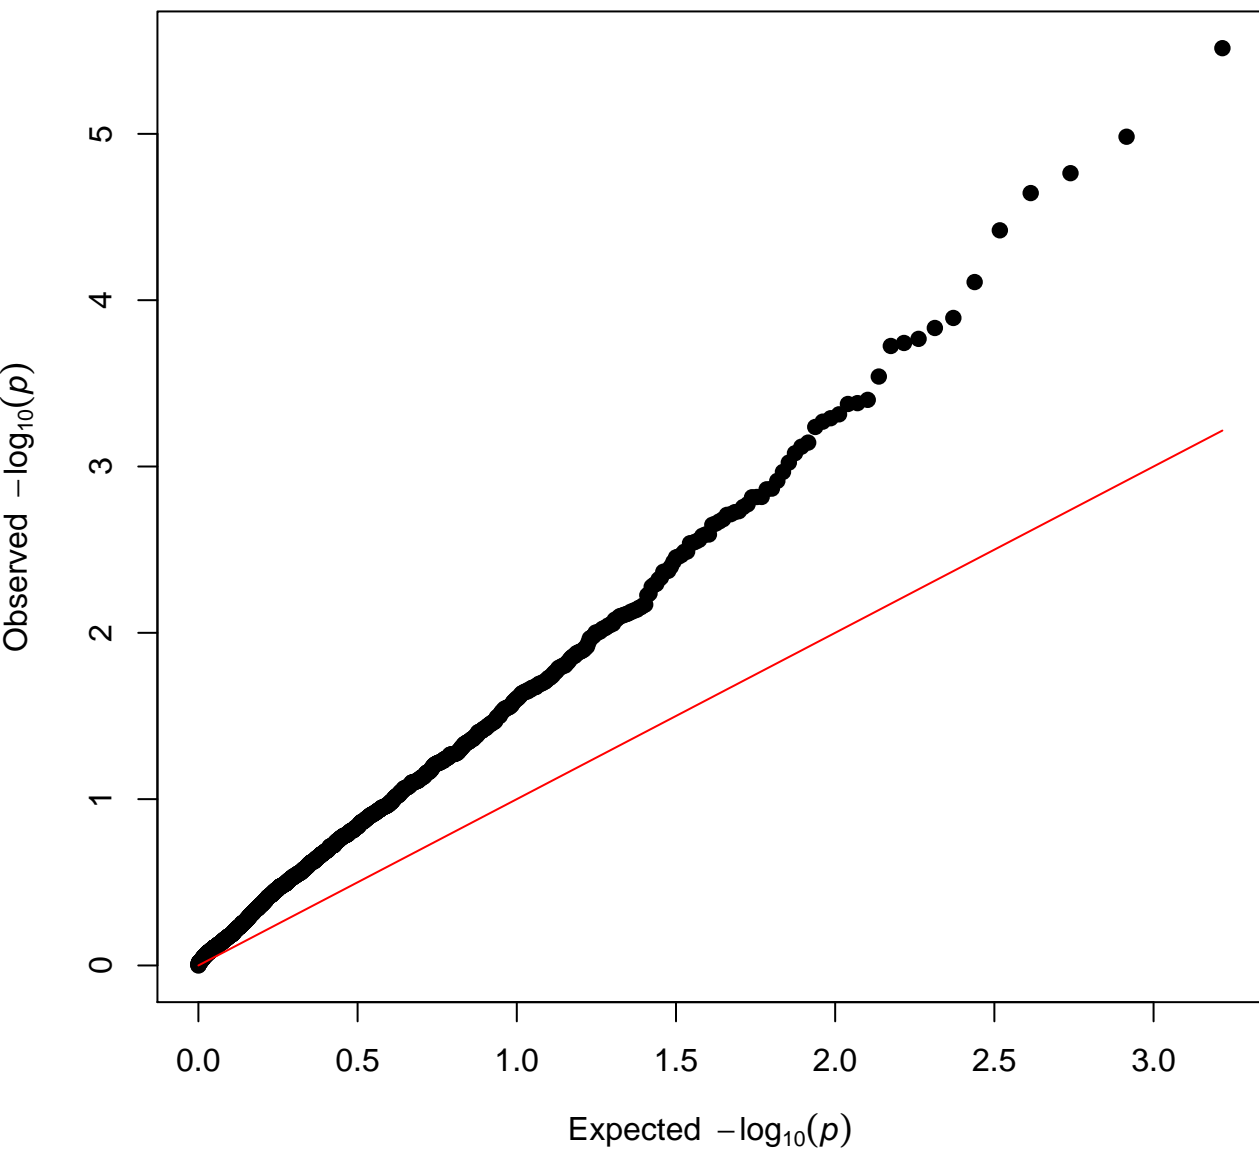

# LMM, X163\_Germ.22

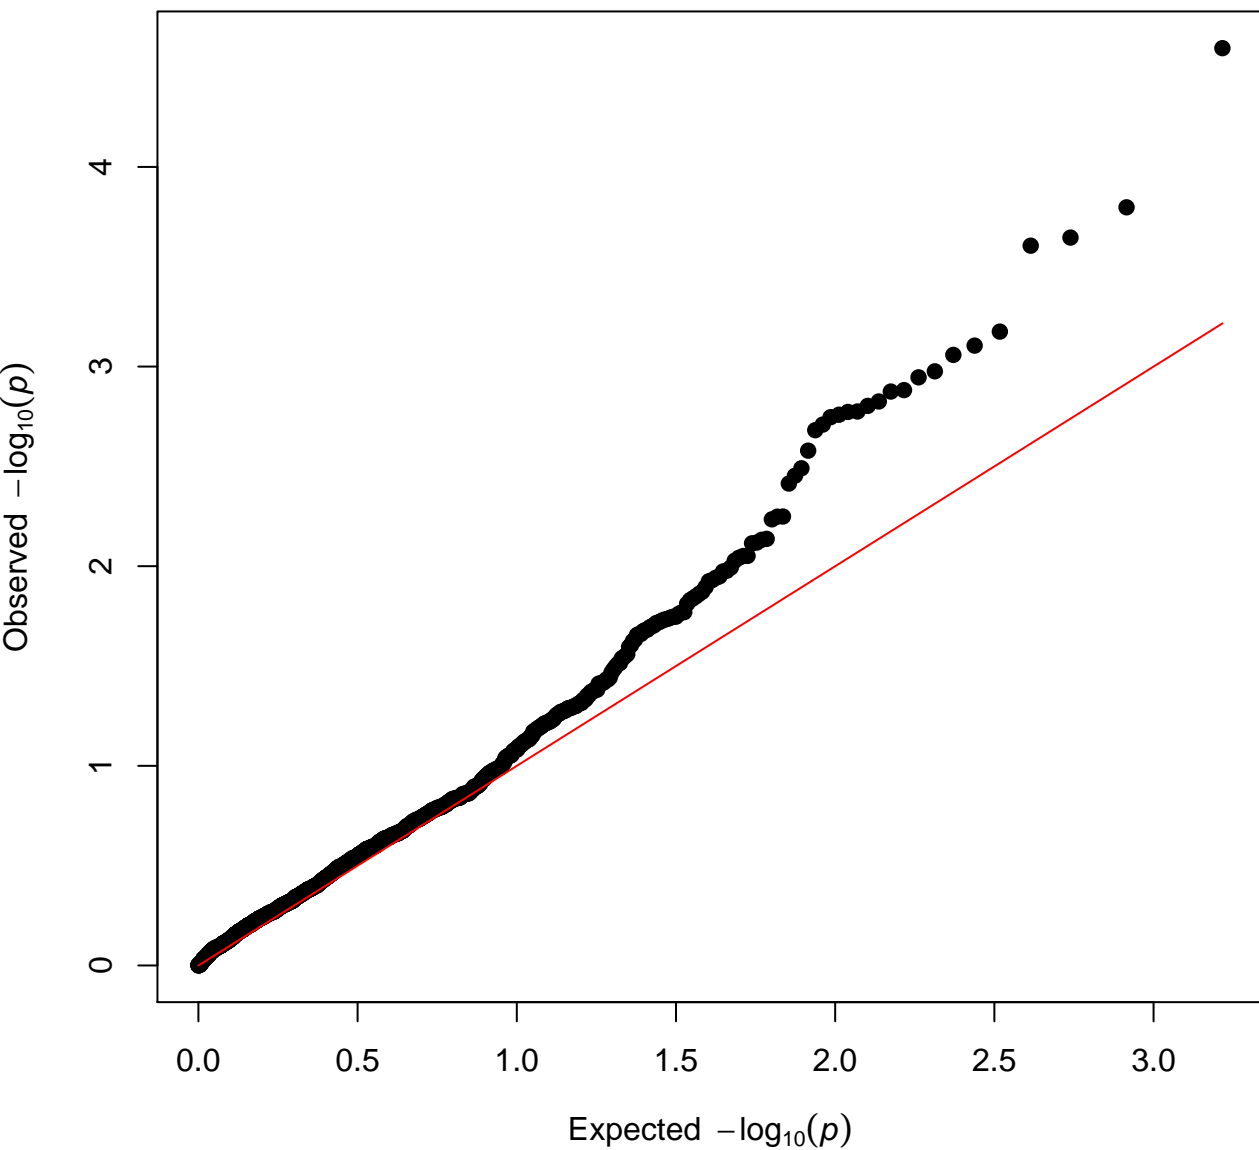

LMM, X165\_Width.16

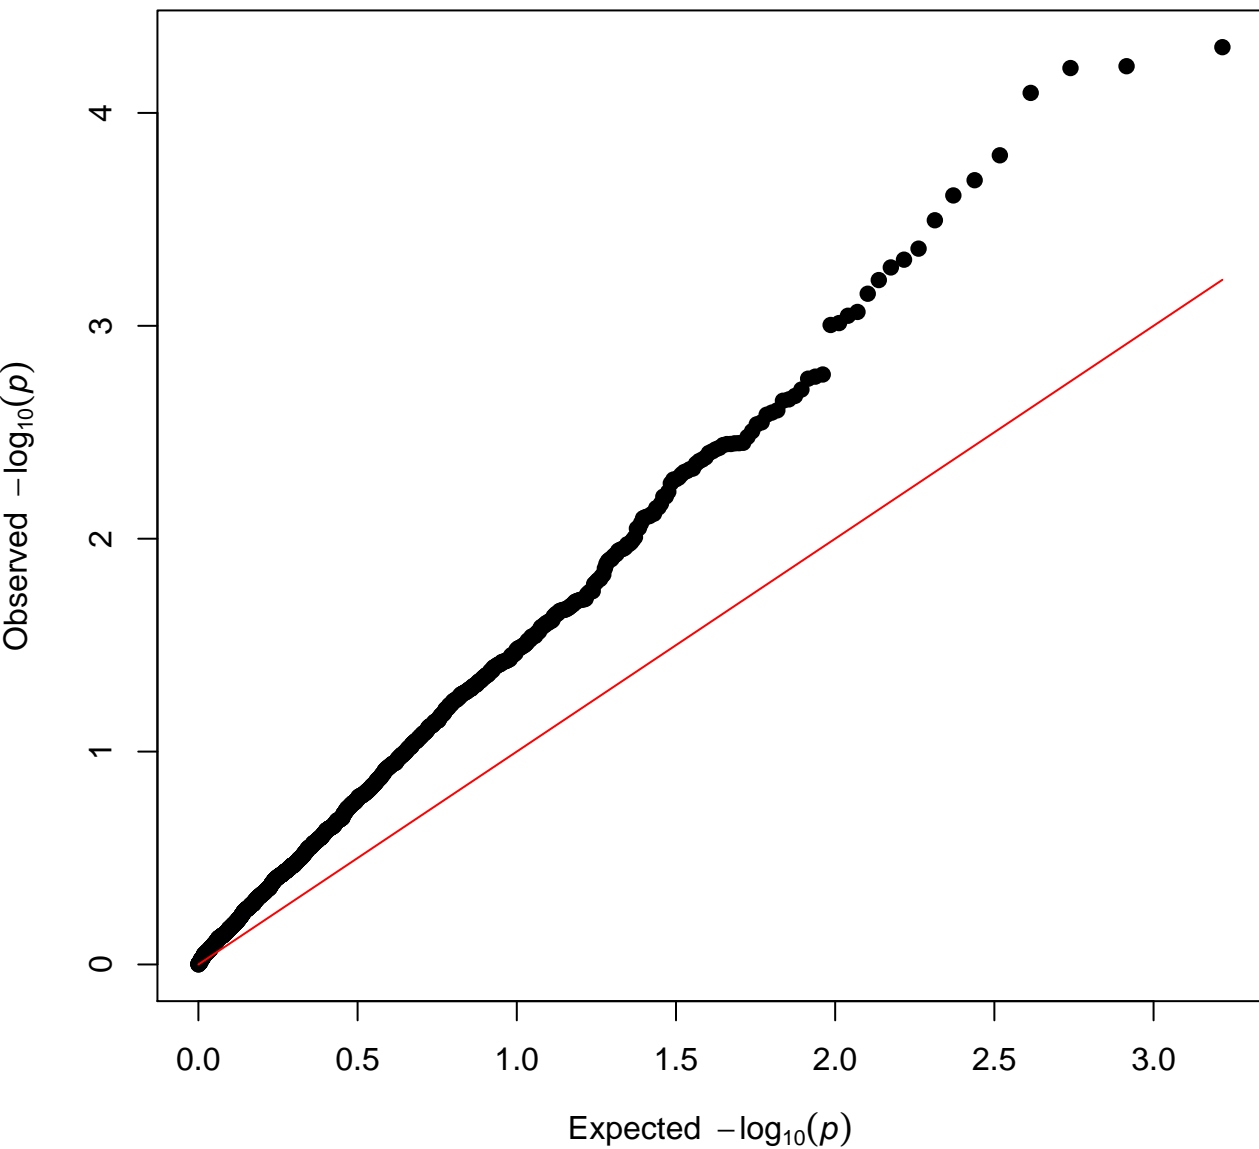

# LMM, X166\_Width.22

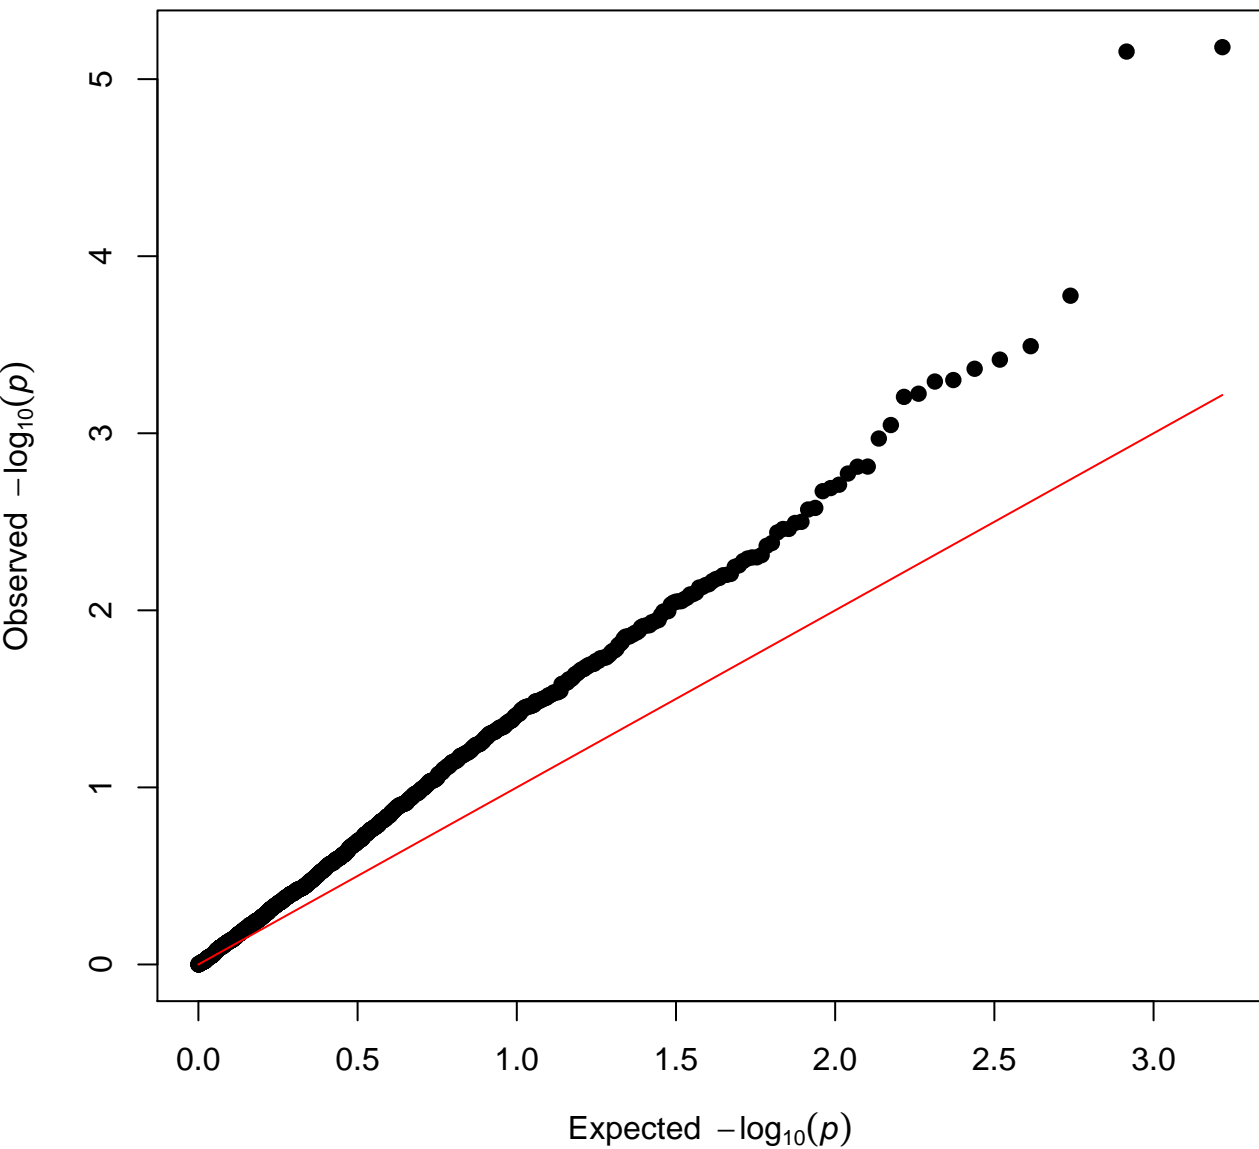

# LMM, X167\_Chlorosis.10

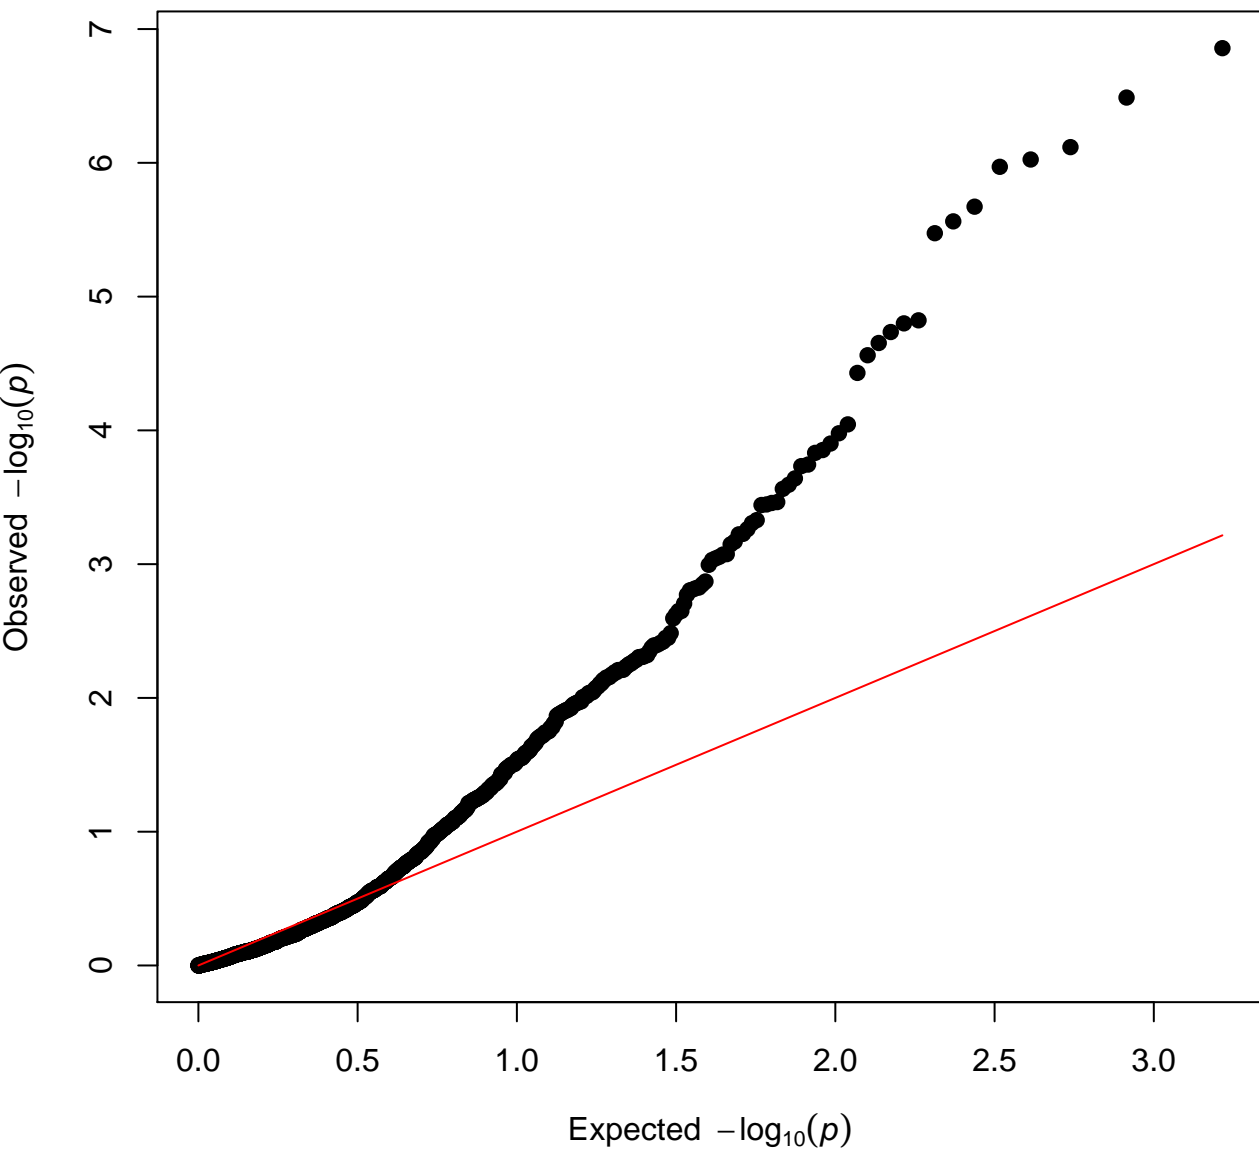

# LMM, X168\_Chlorosis.16

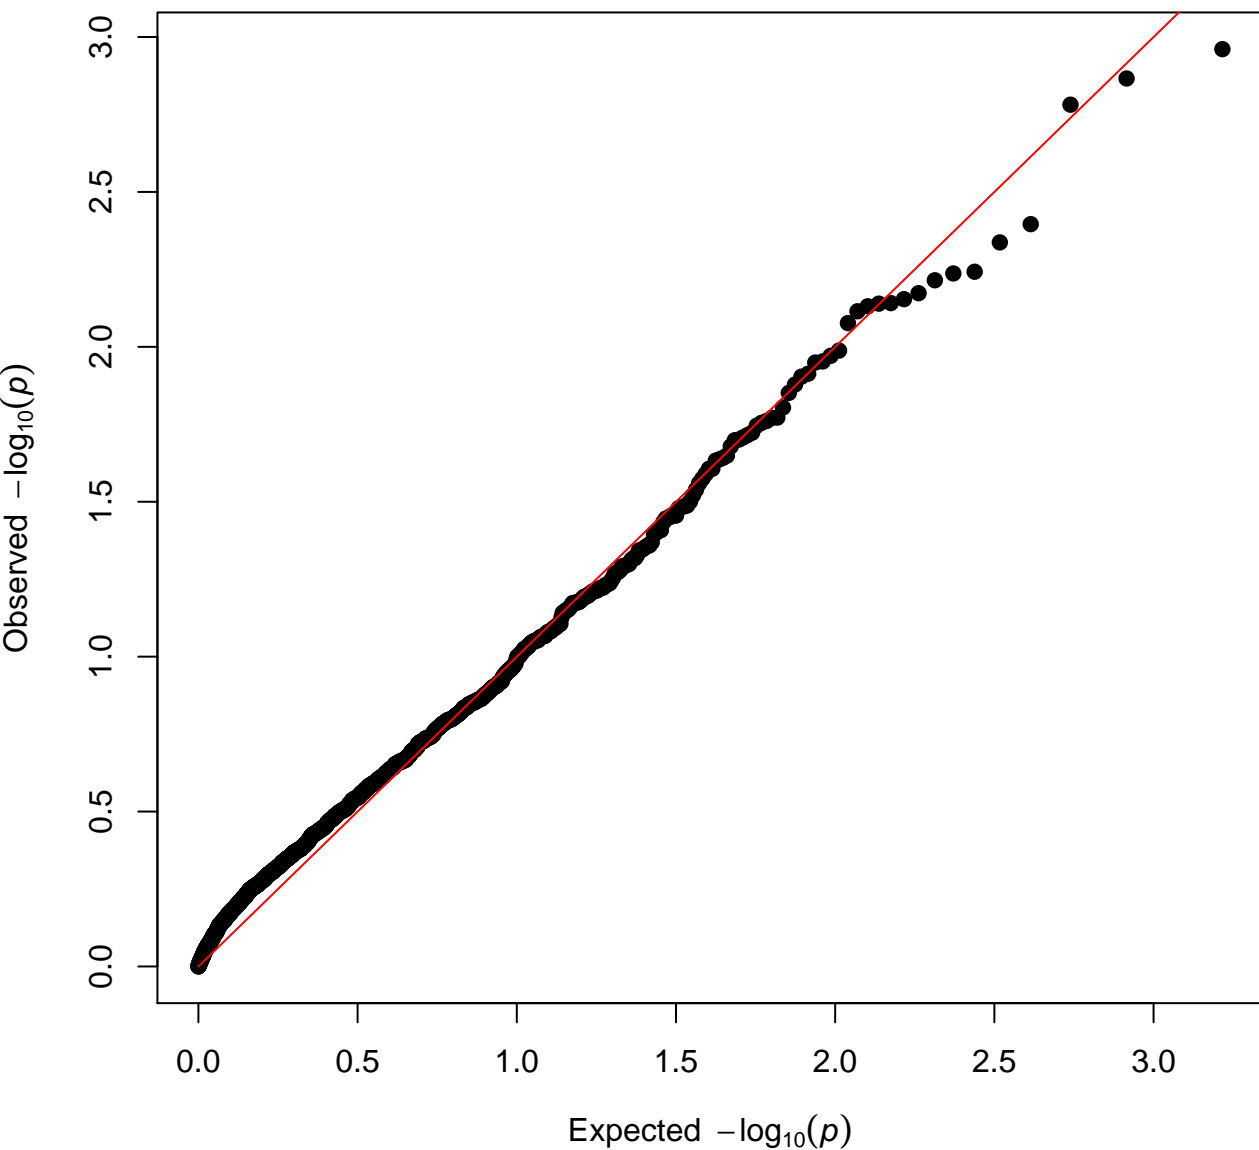

# LMM, X169\_Chlorosis.22

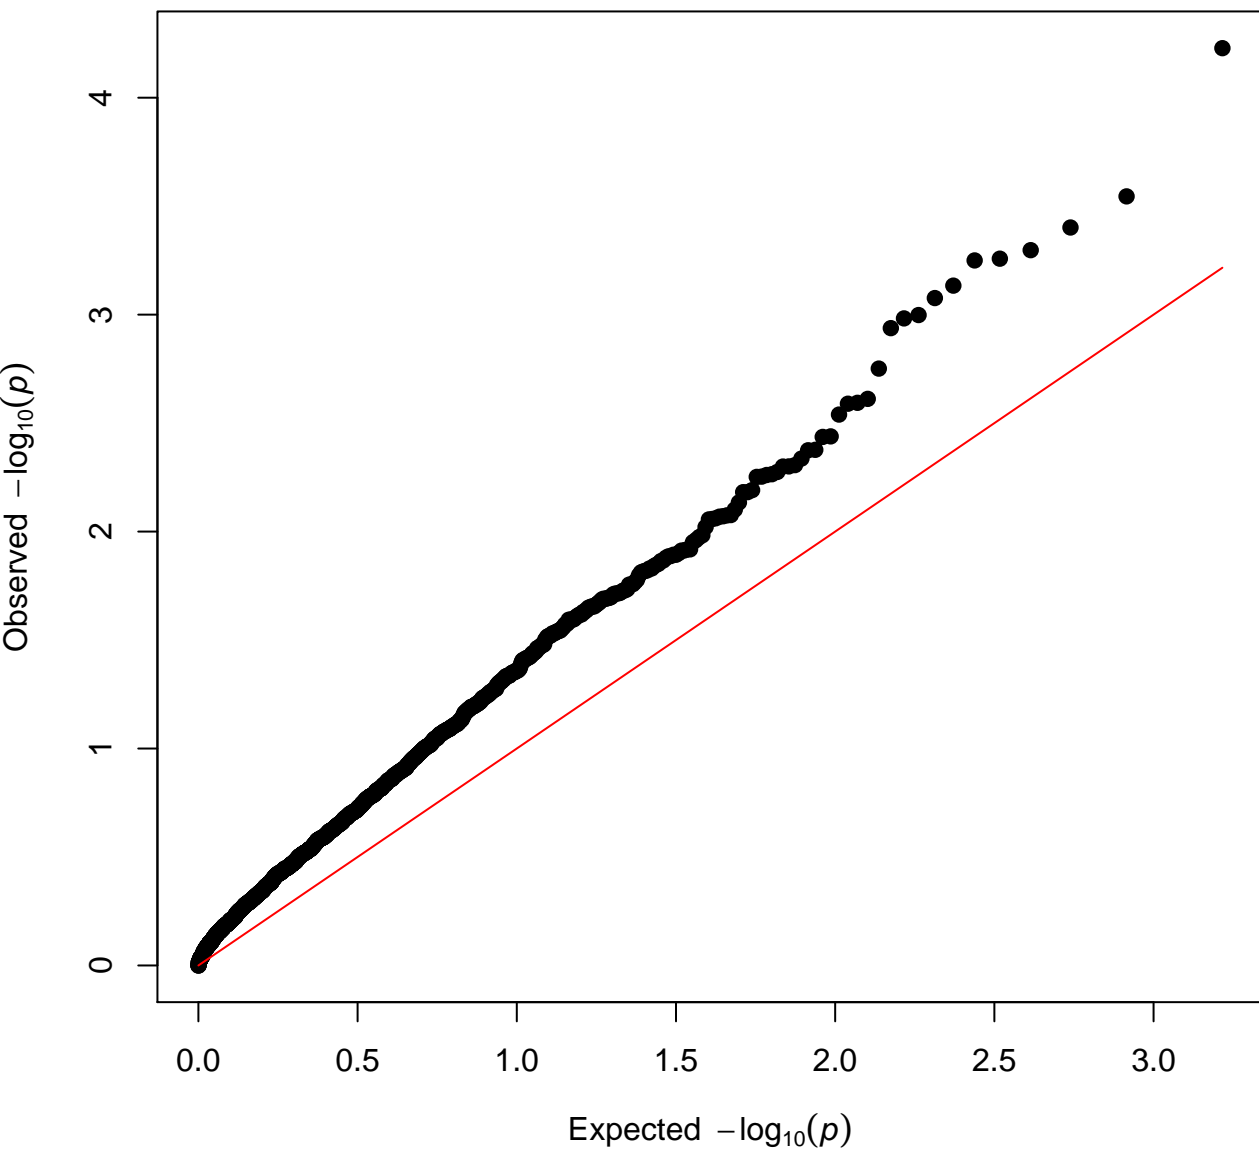

# LMM, X170\_Anthocyanin.10

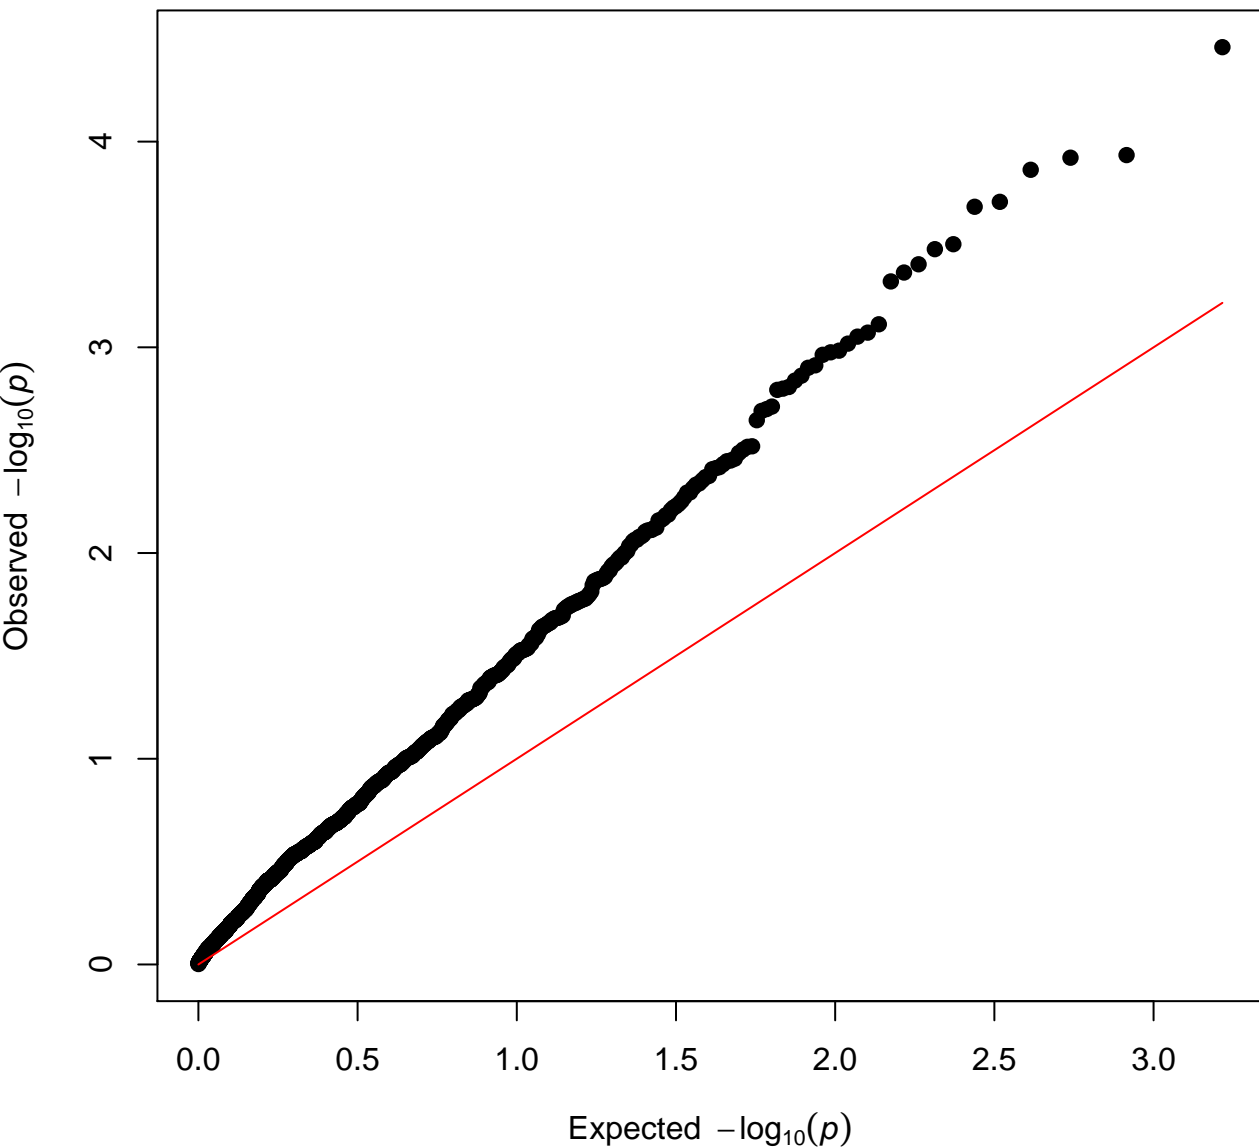



# LMM, X171\_Anthocyanin.16

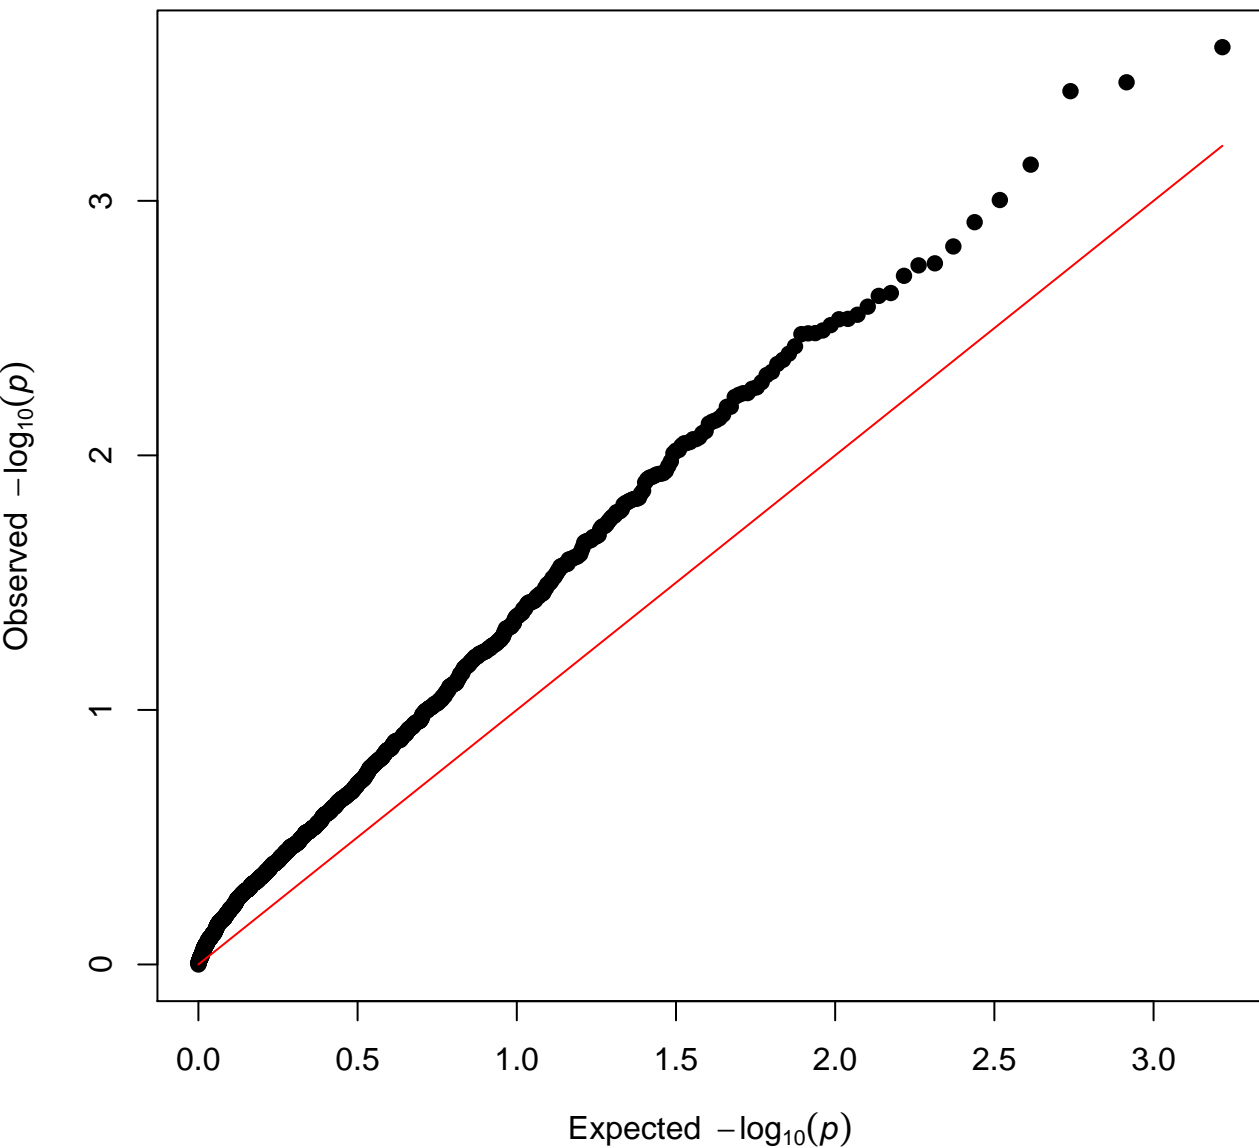

# LMM, X172\_Anthocyanin.22

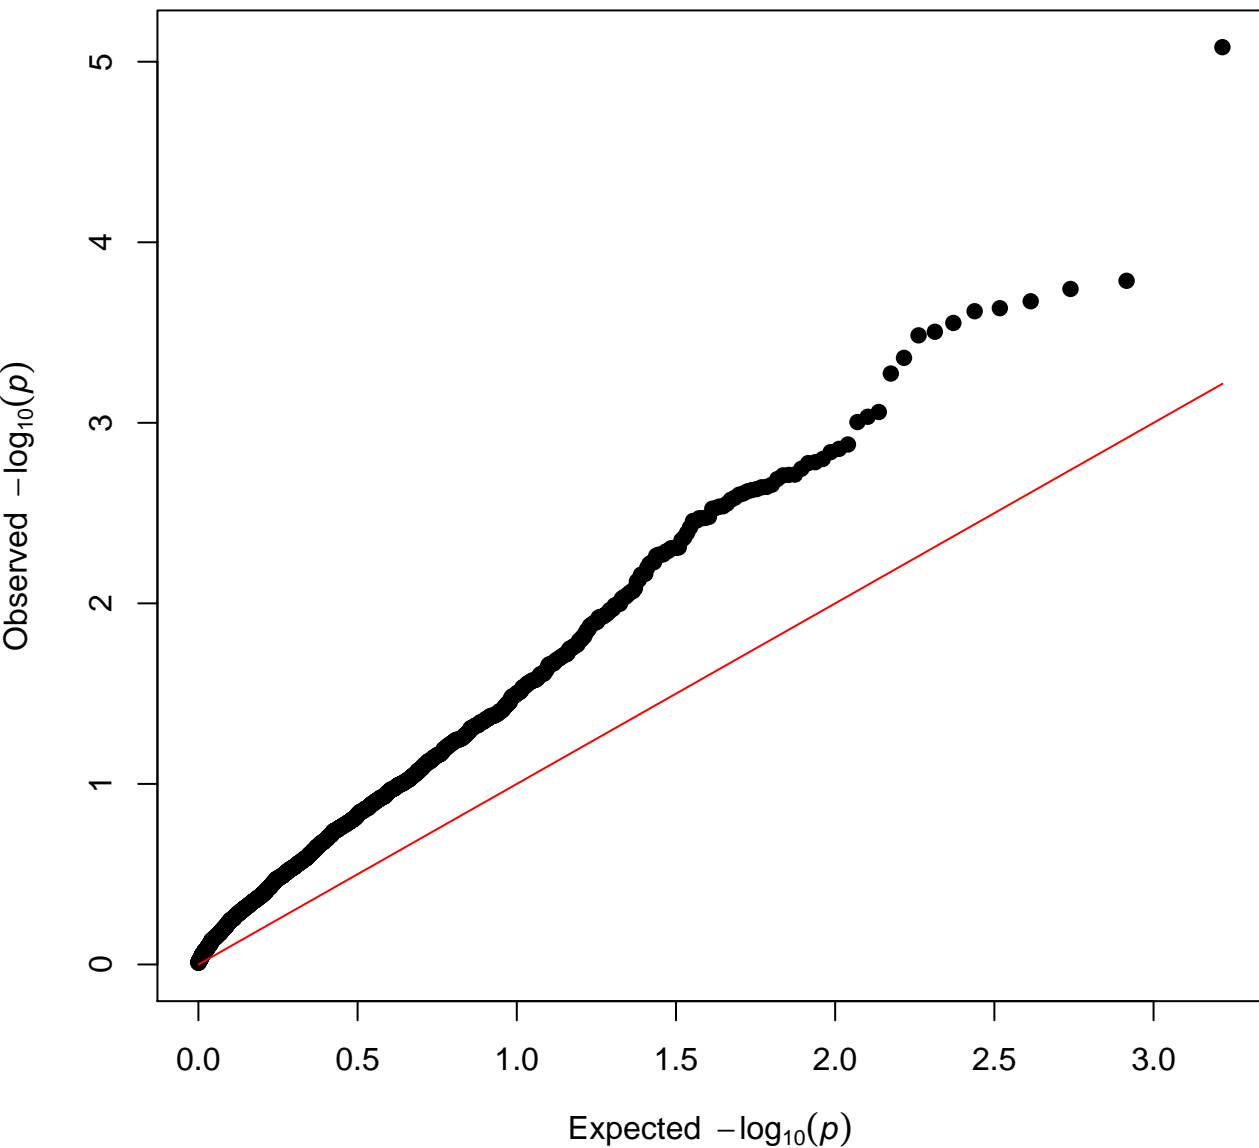

# LMM, X173\_Leaf.serr.10

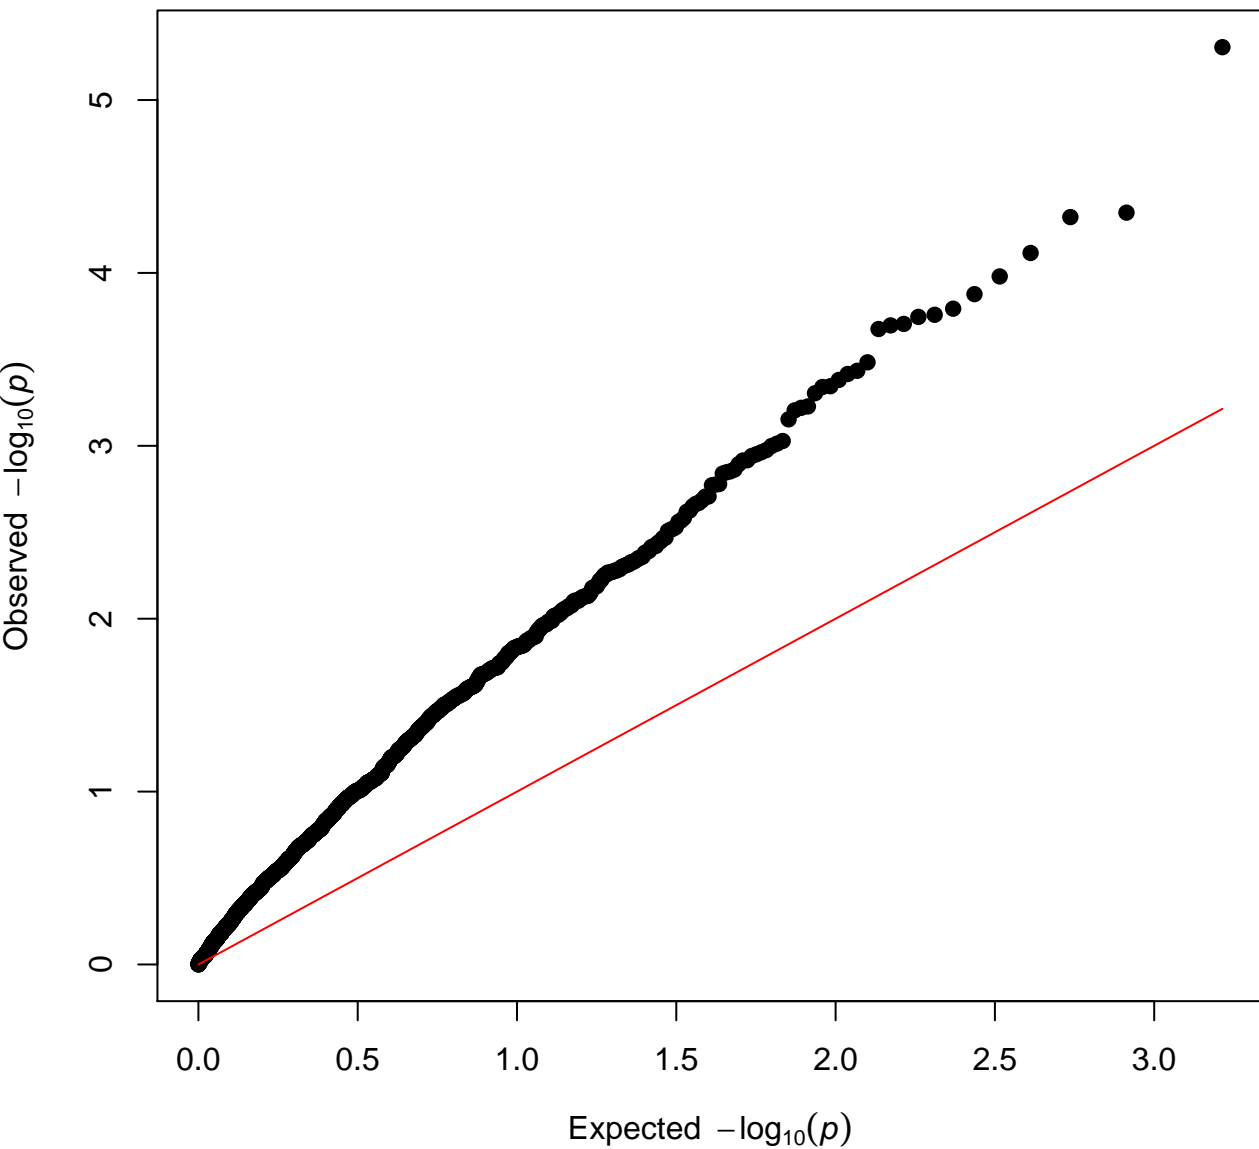

# LMM, X174\_Leaf.serr.16

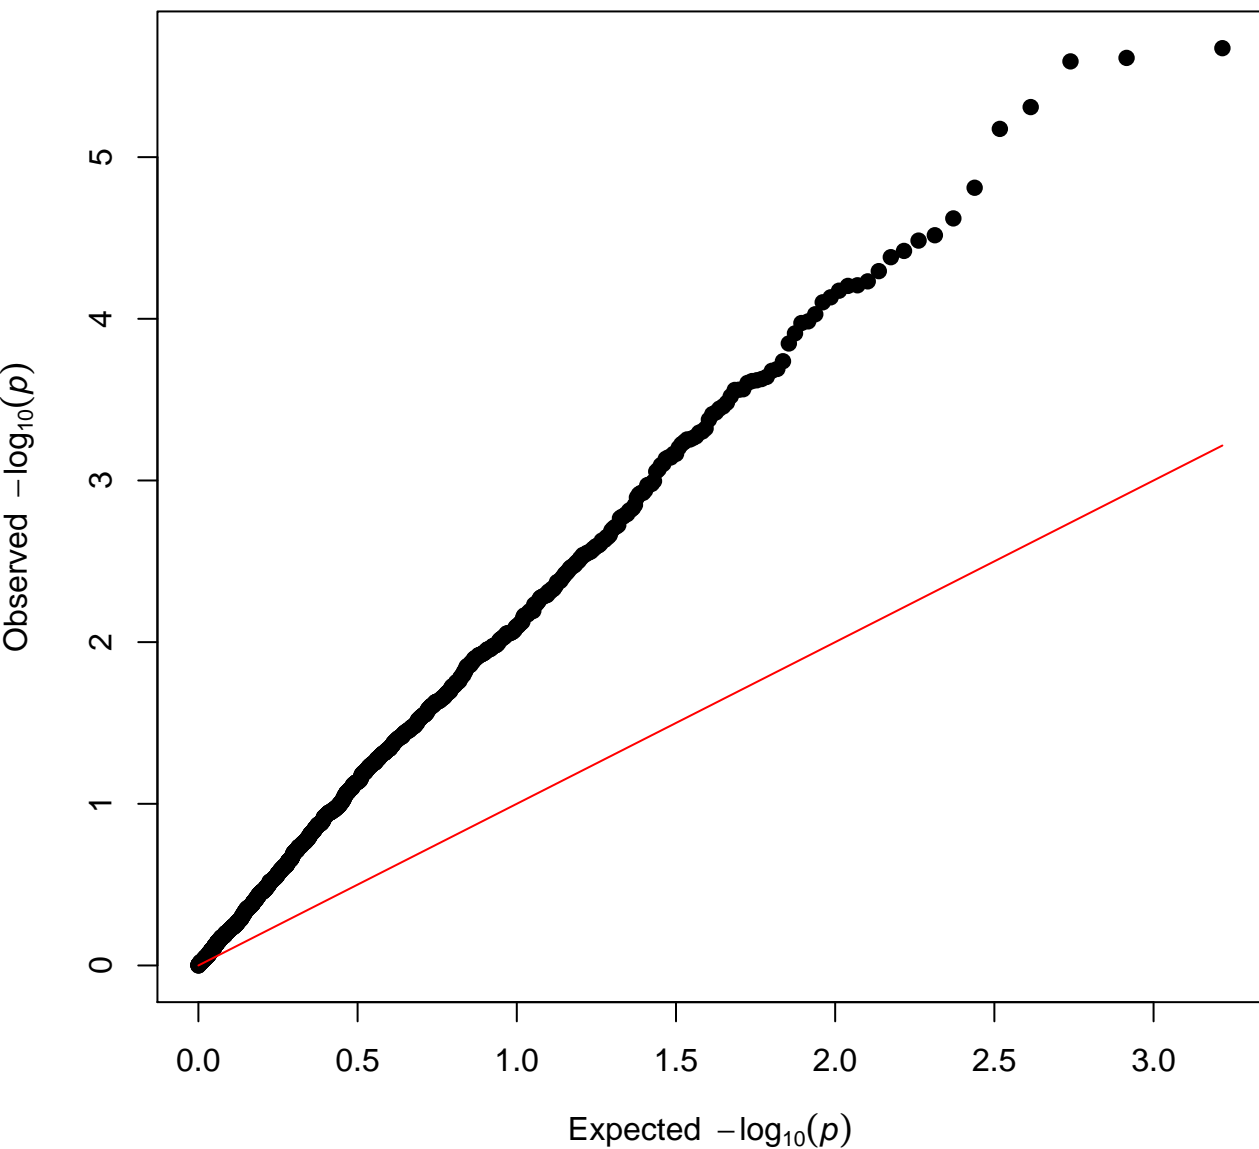

# LMM, X175\_Leaf.serr.22

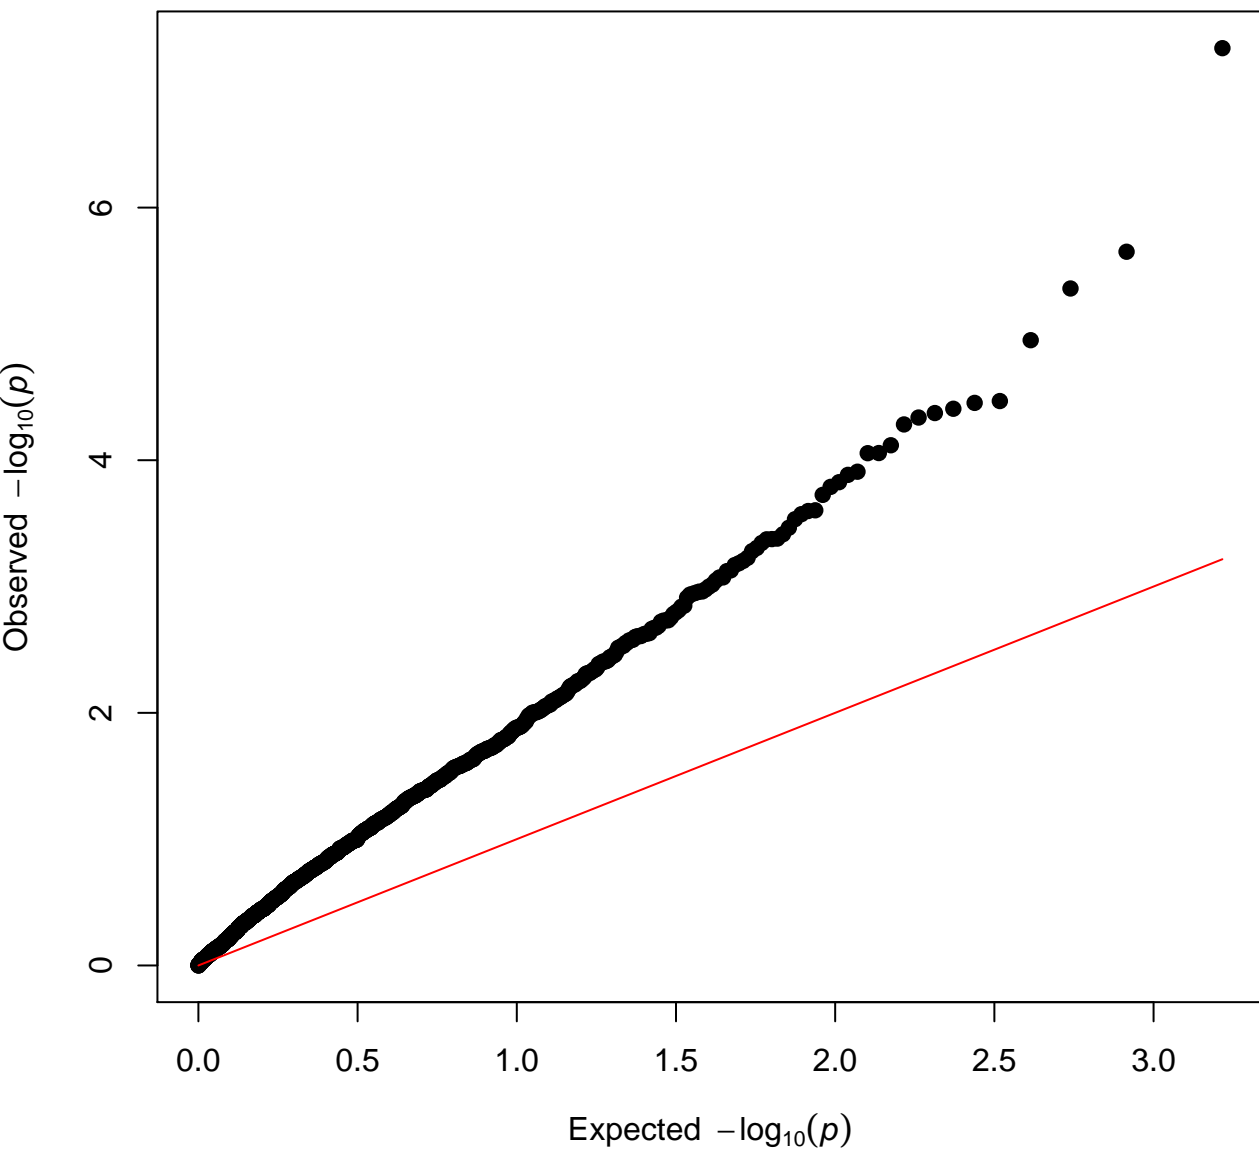

# LMM, X176\_Leaf.roll.10

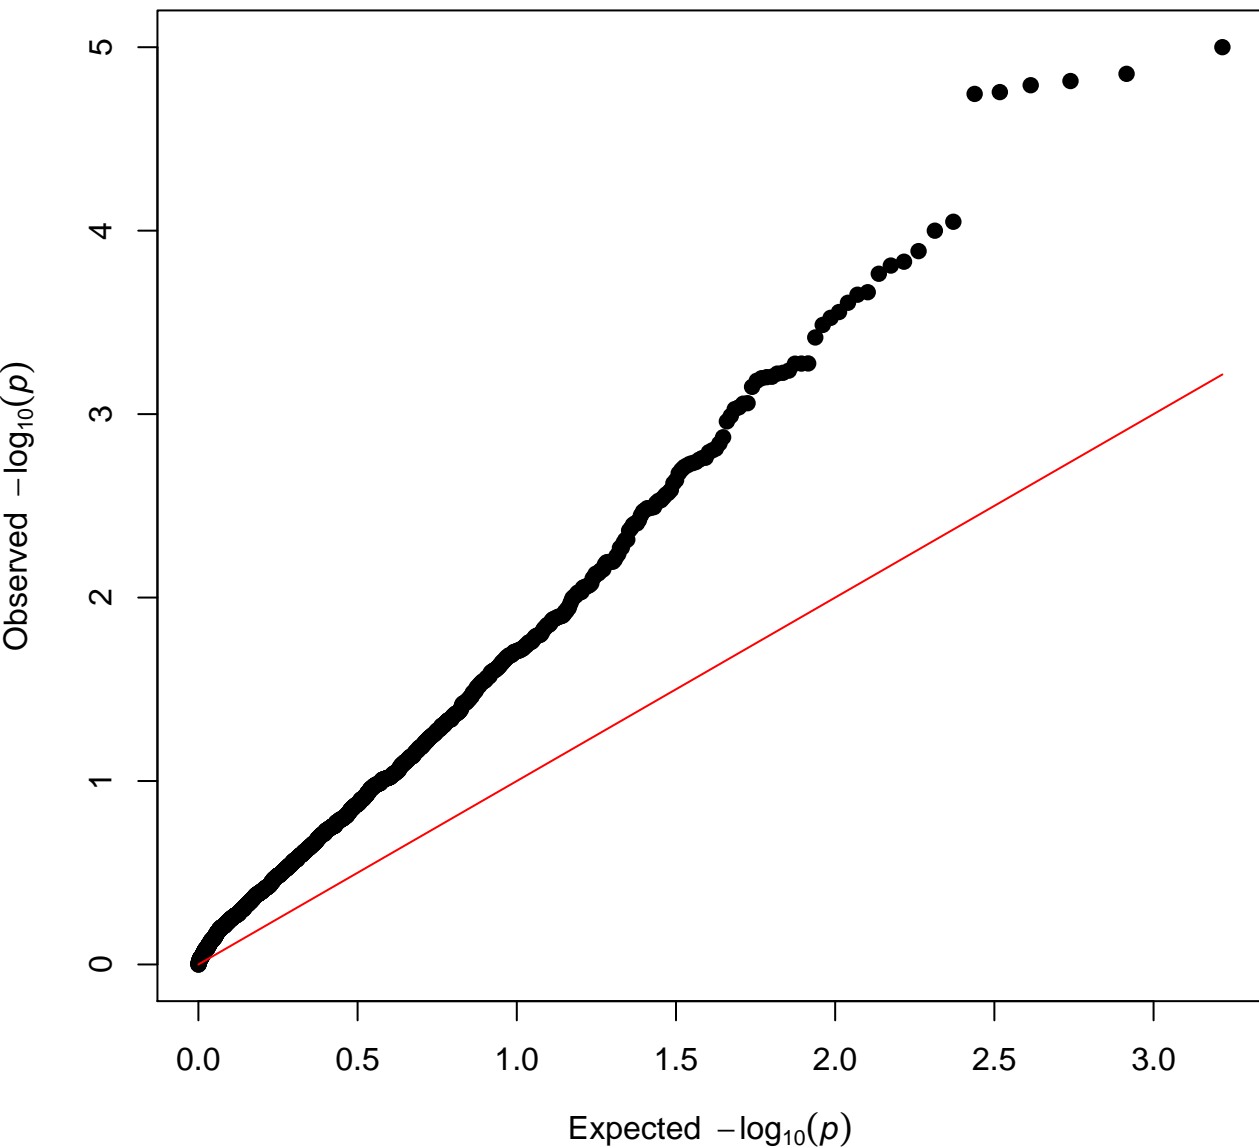

# LMM, X177\_Leaf.roll.16

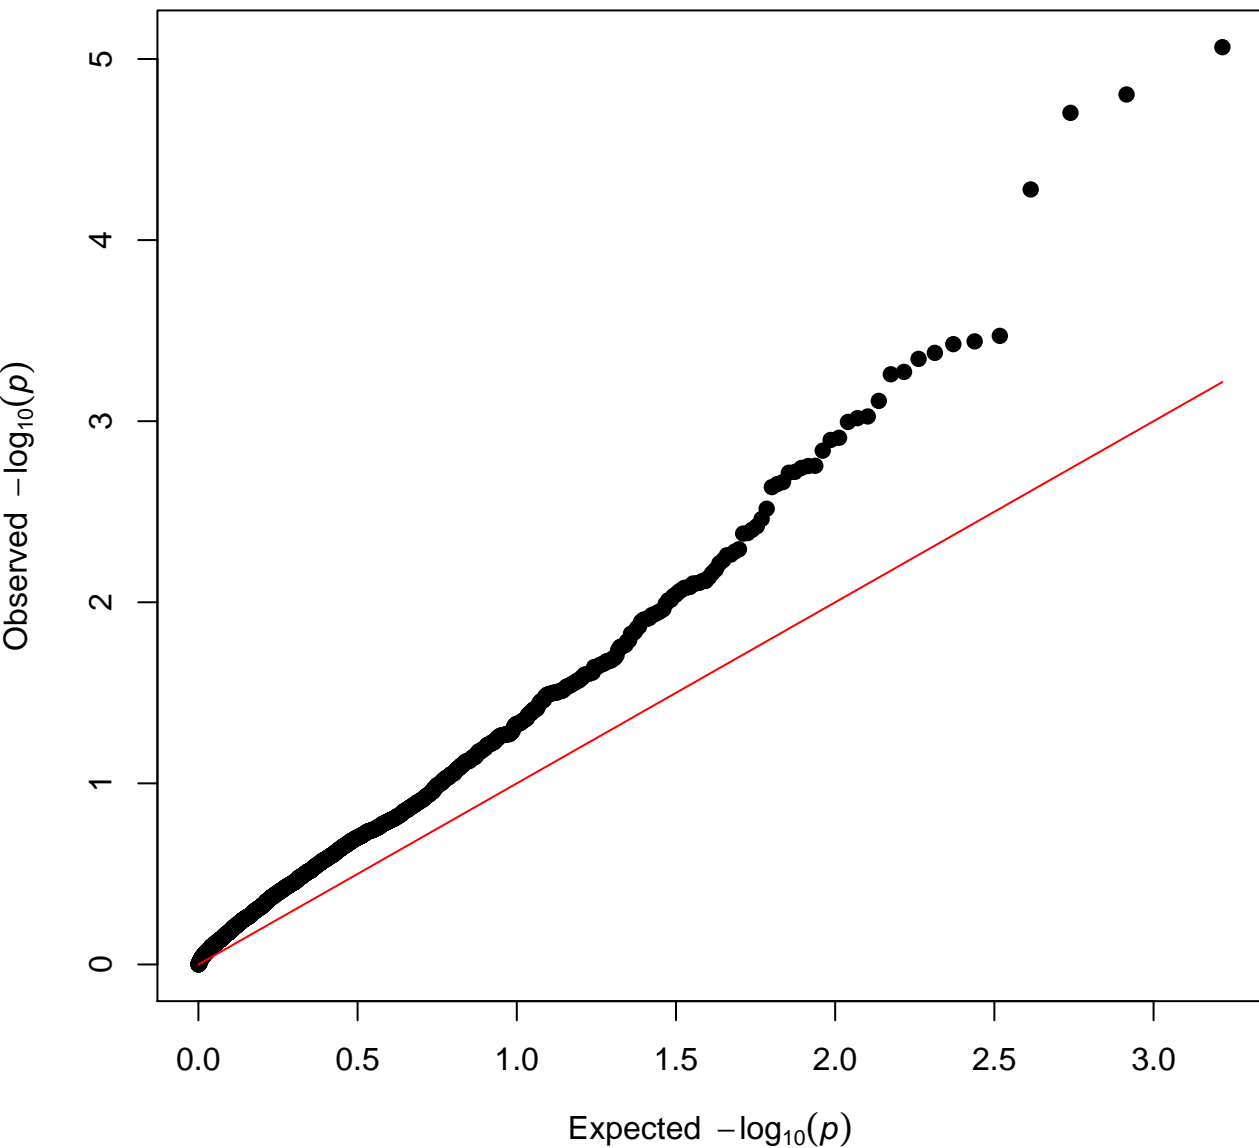

# LMM, X178\_Leaf.roll.22

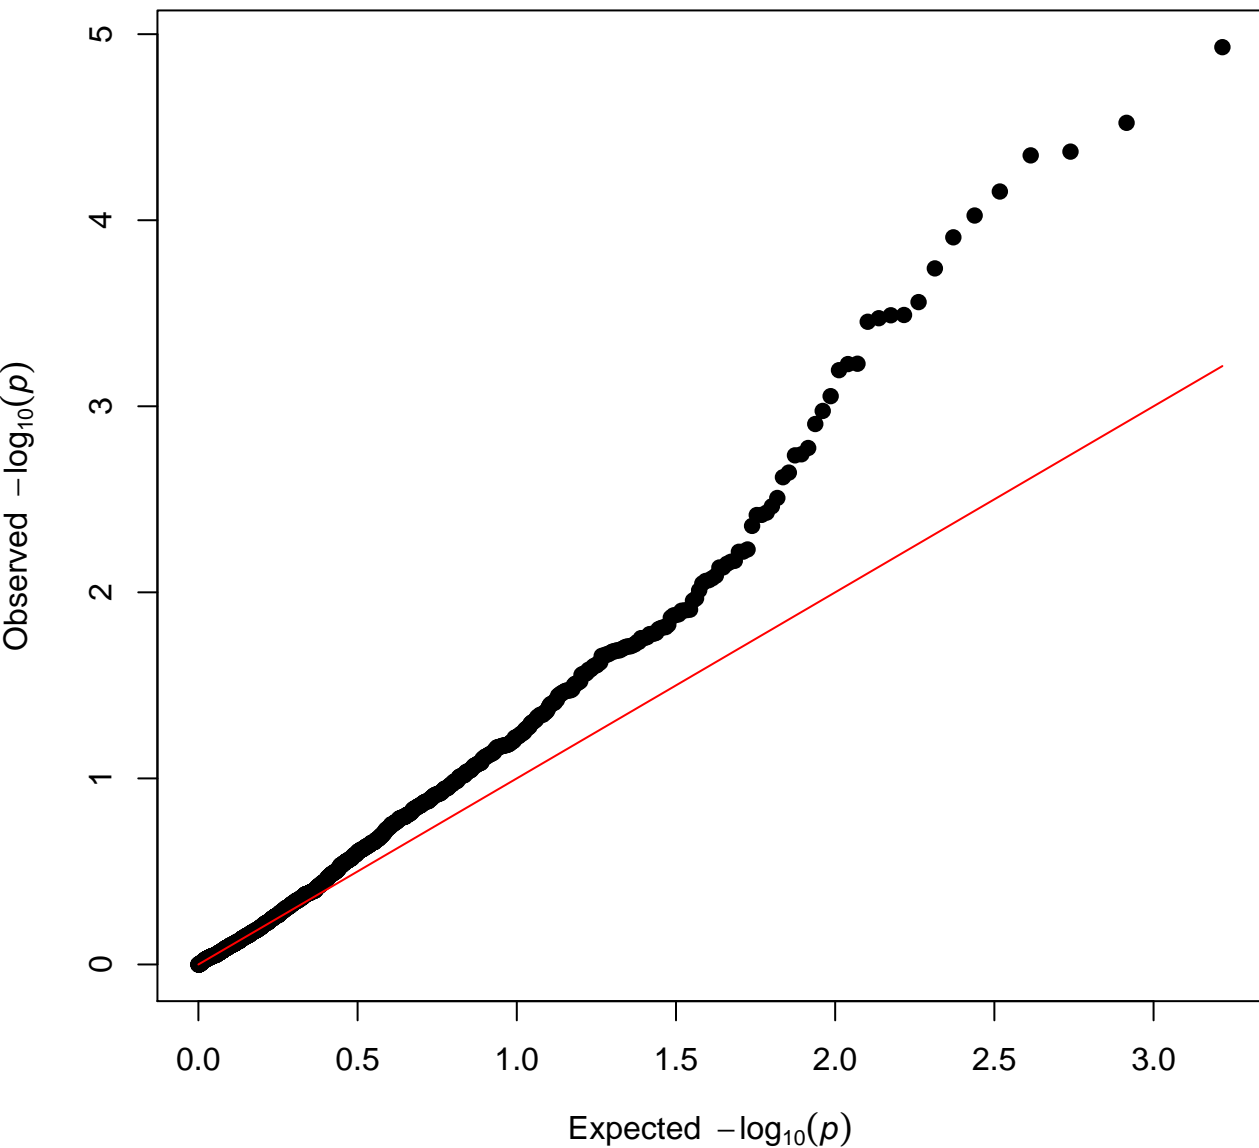



# LMM, X179\_Rosette.Erect.22

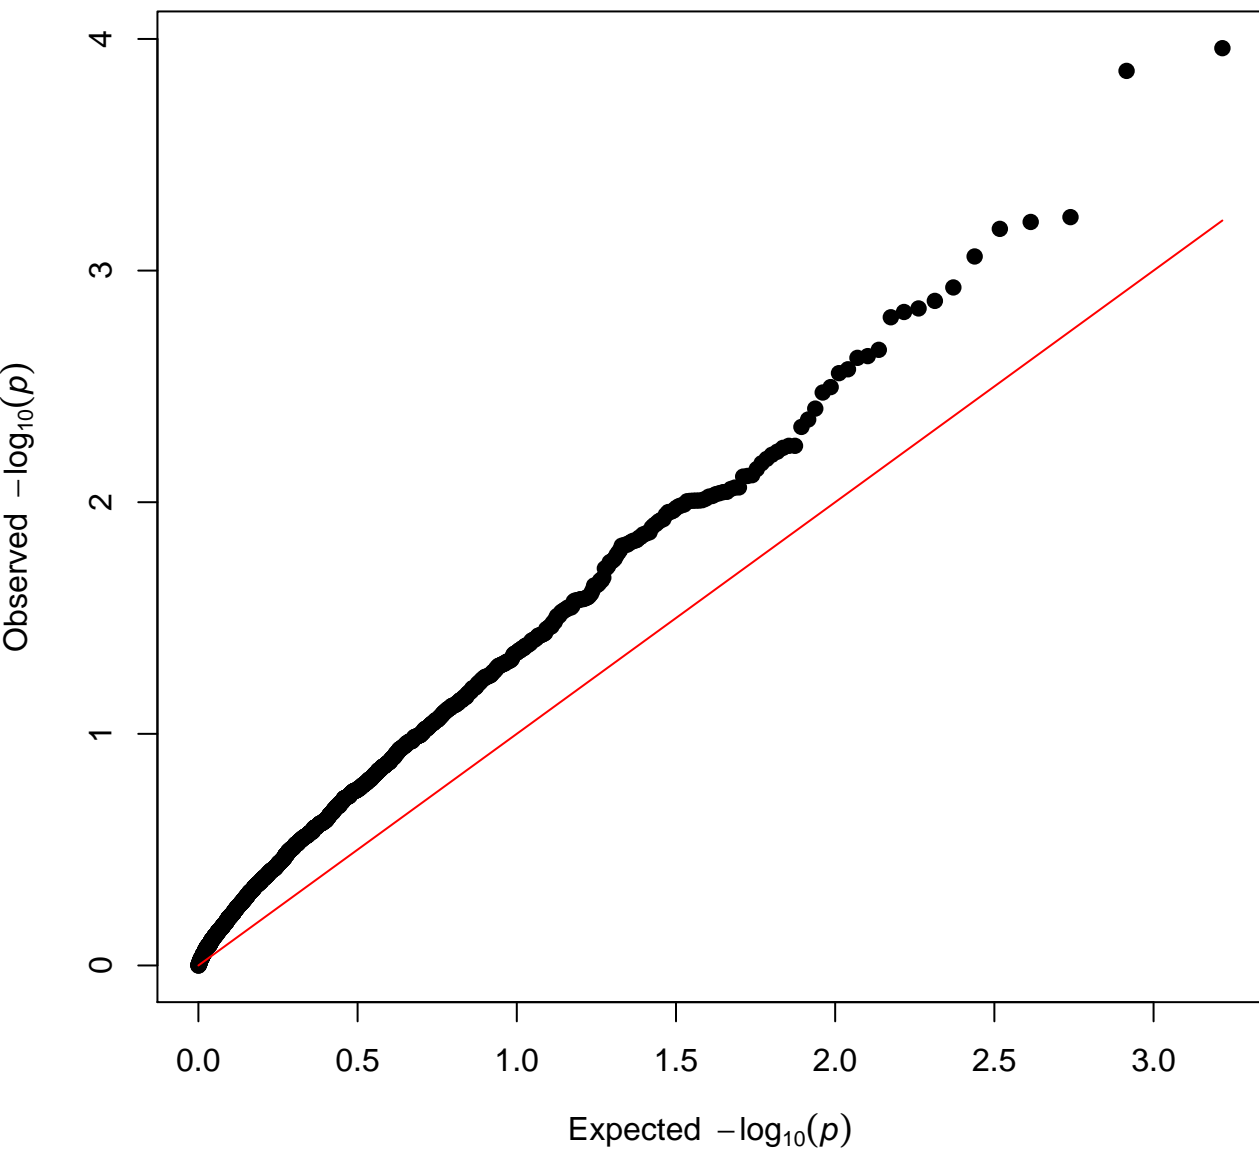

# LMM, X182\_Hypocotyl.length

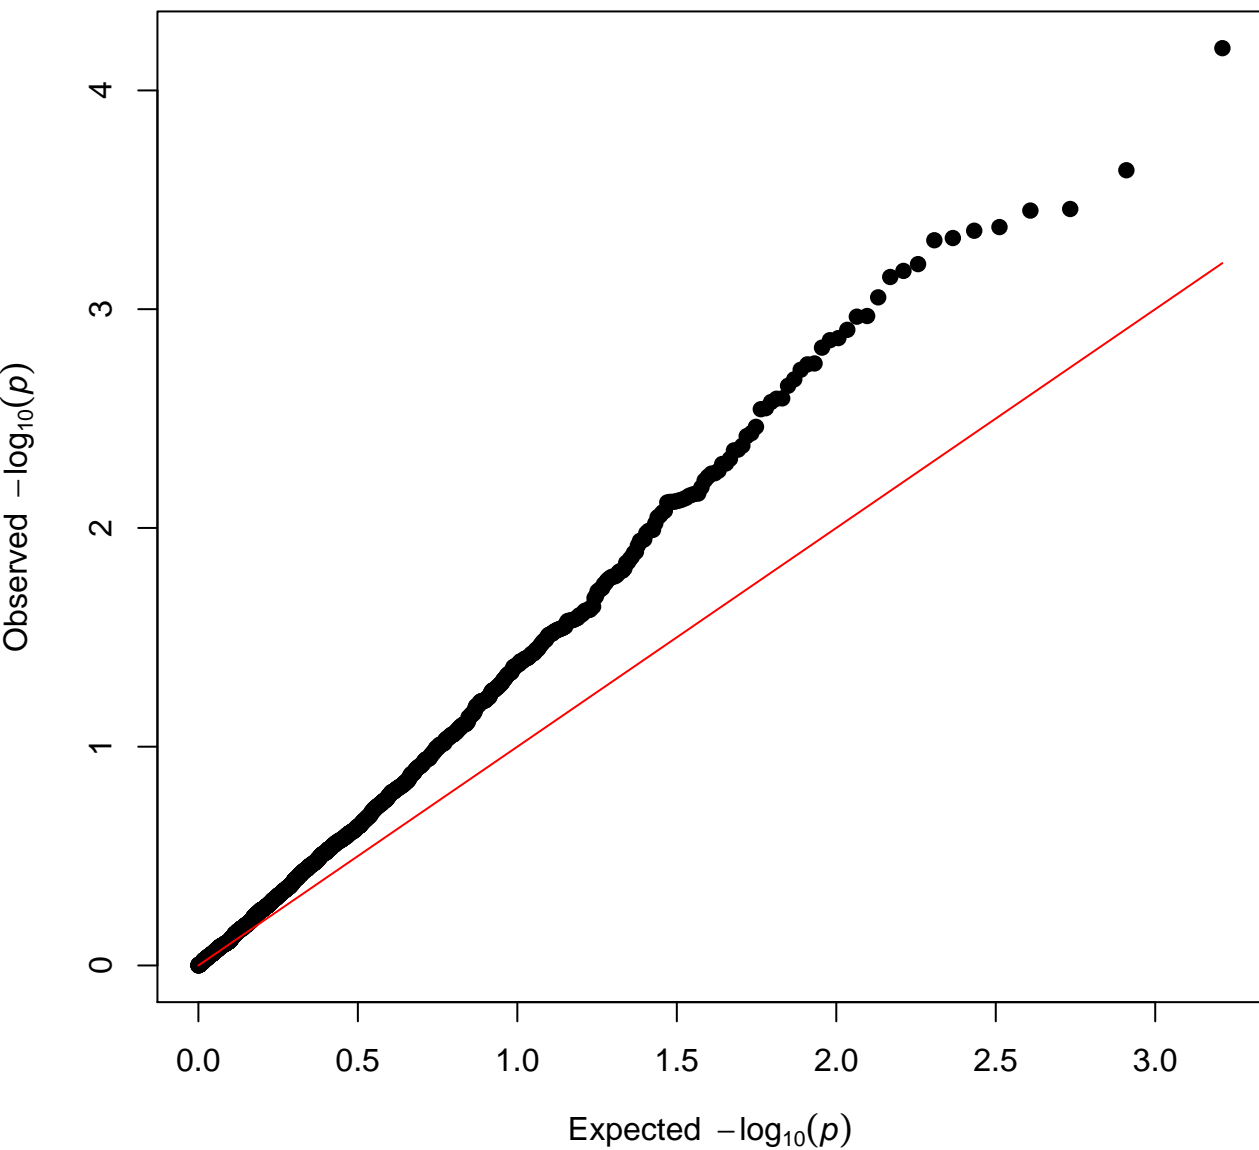

# LMM, X183\_Trichome.avg.C

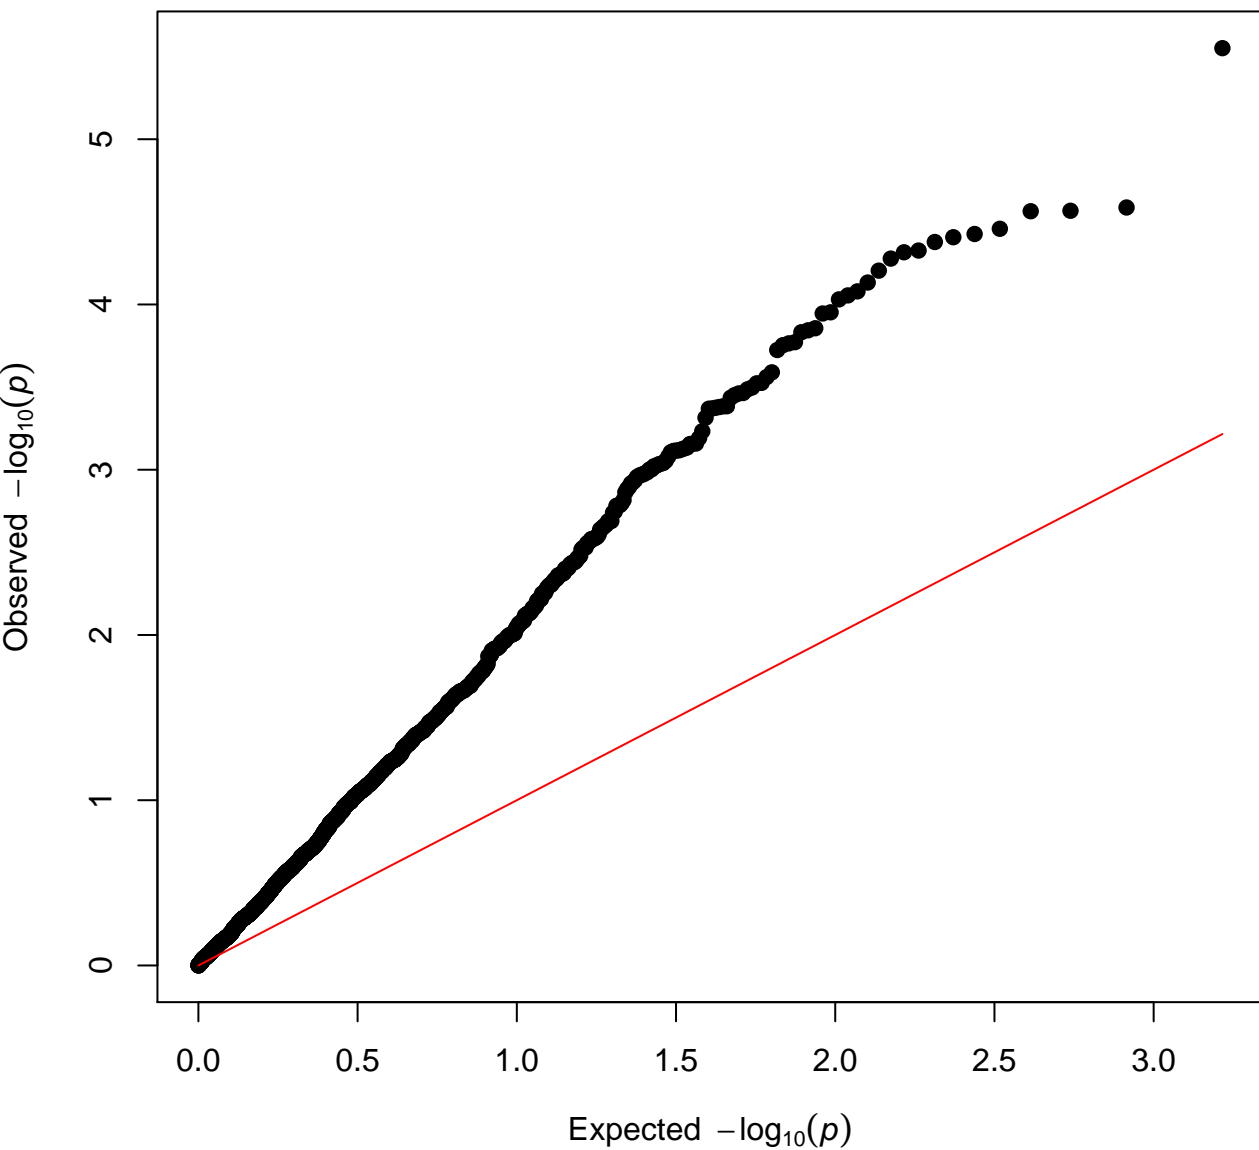

# LMM, X184\_Trichome.avg.JA

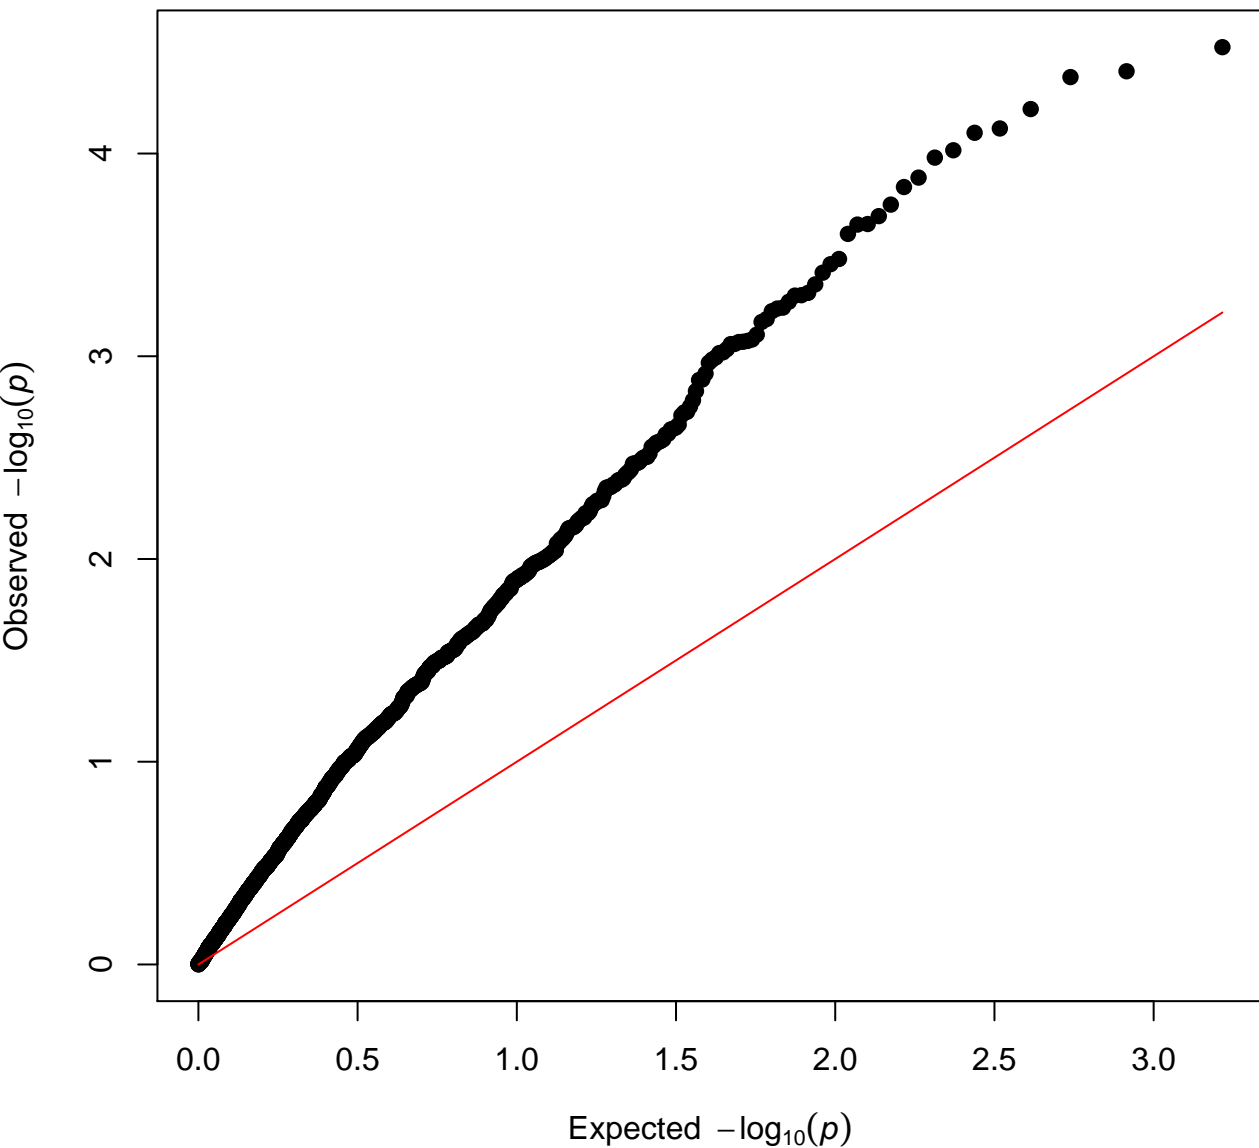

# LMM, X185\_Aphid.number

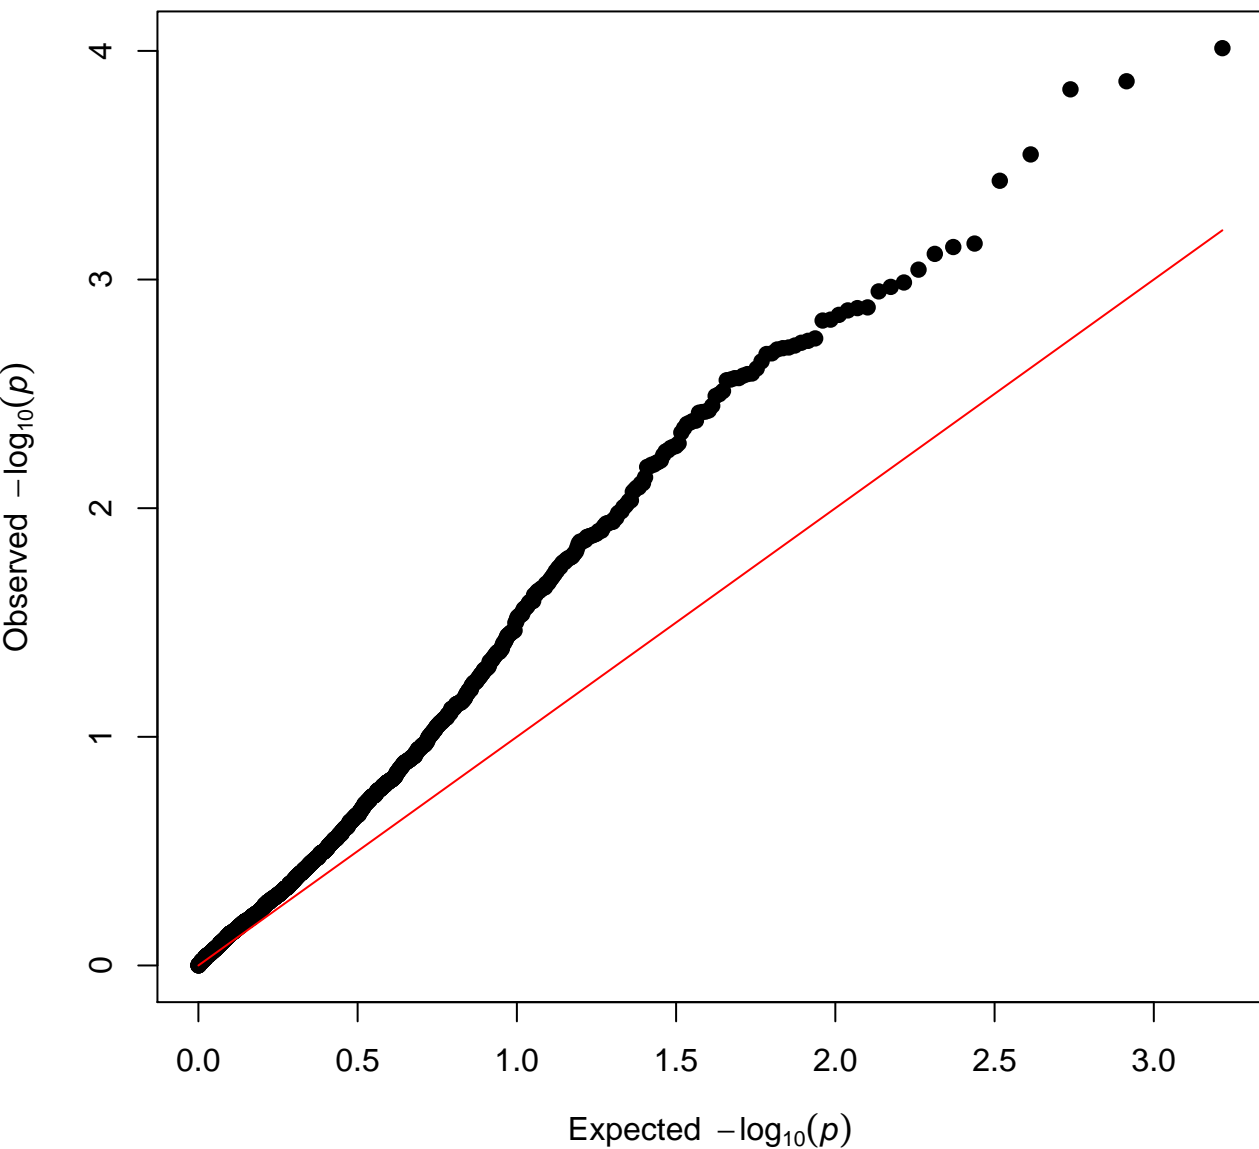

# LMM, X186\_Bacterial.titer

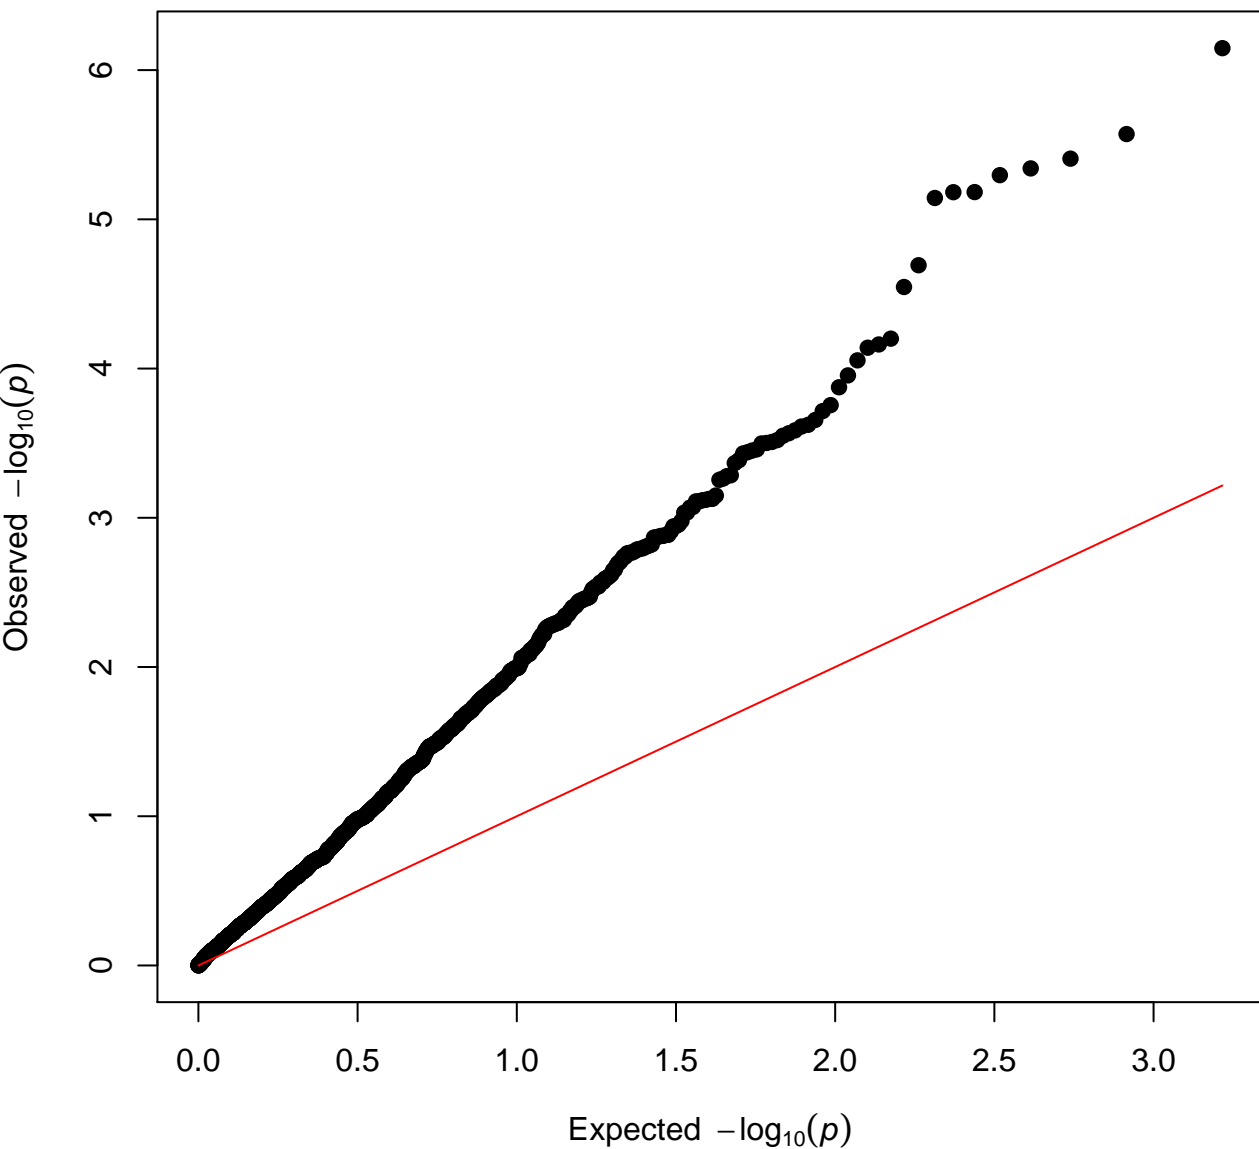

# LMM, X272\_Seedling.Growth

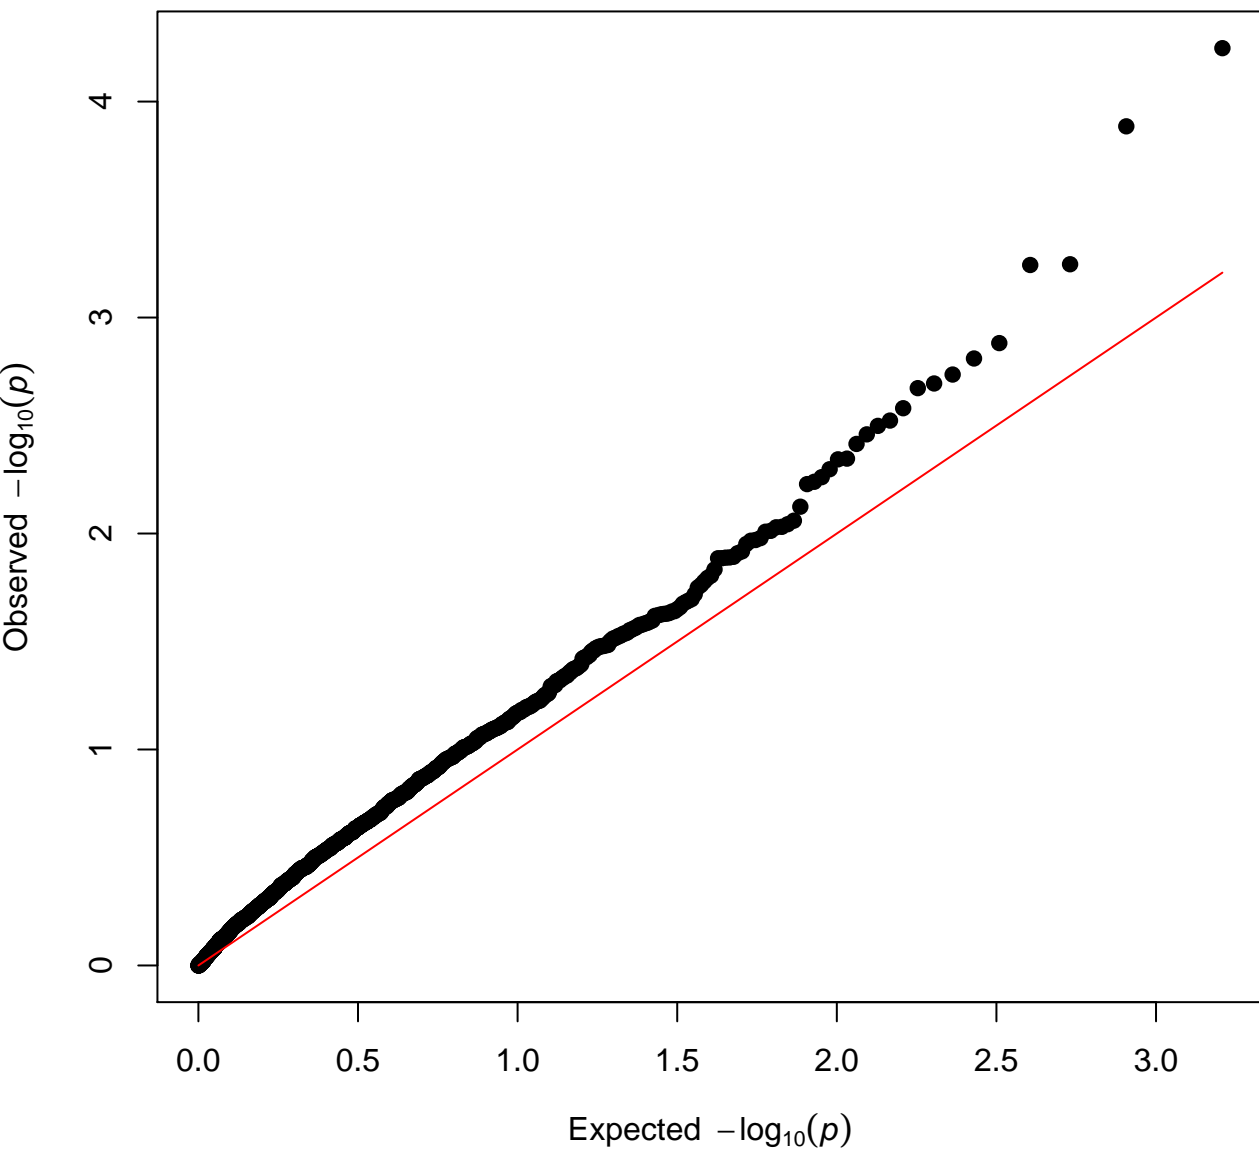

# LMM, X273\_Vern.Growth

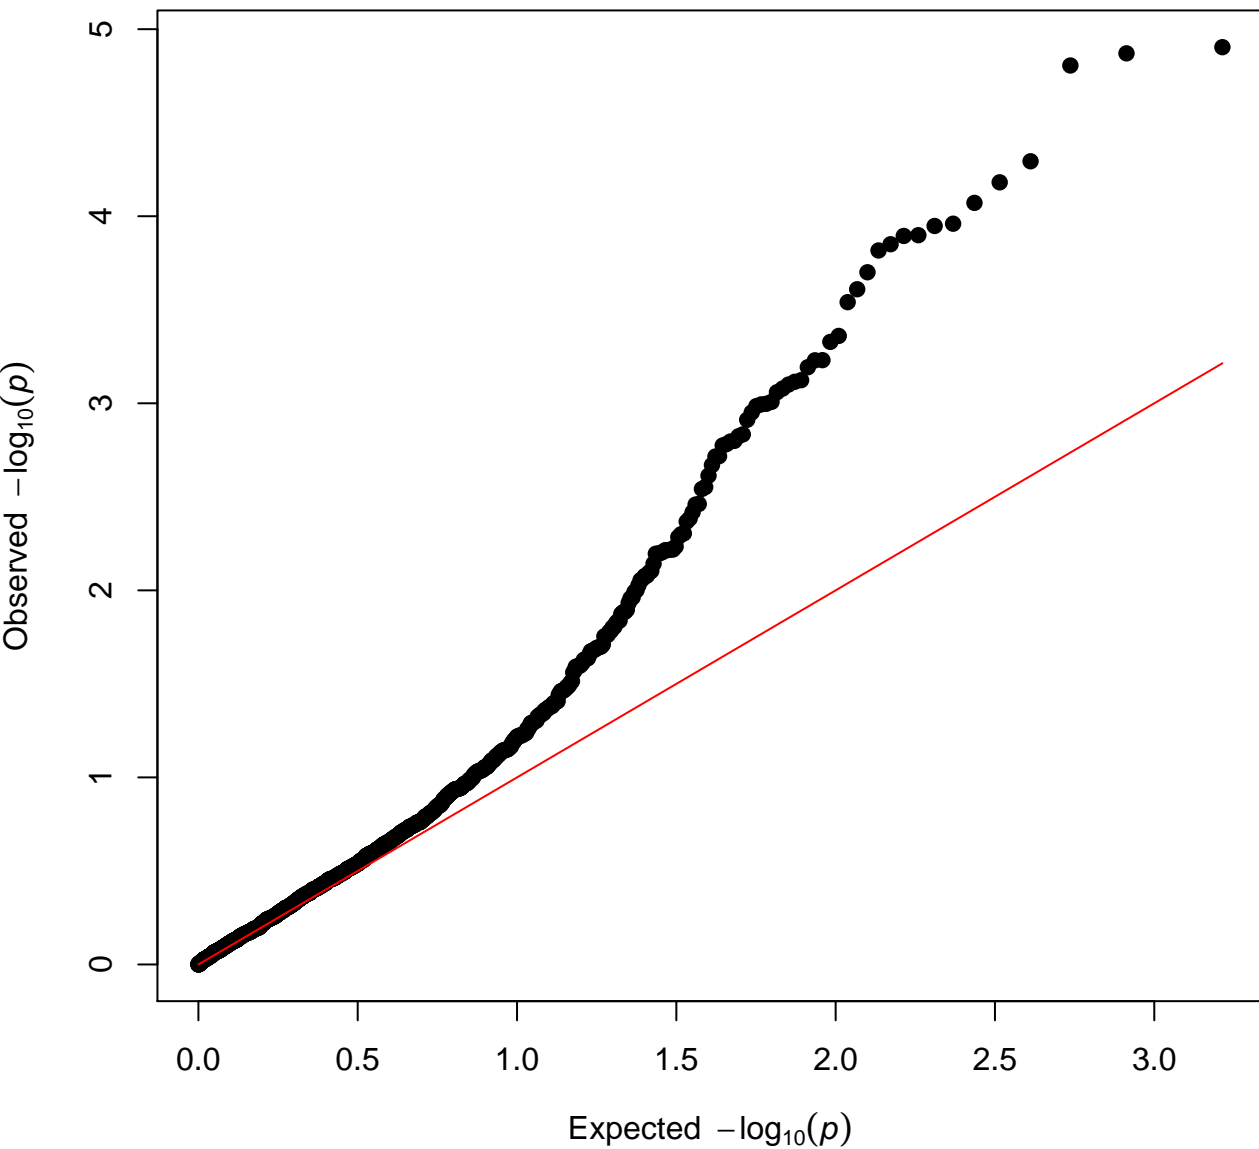



# LMM, X274\_After.Vern.Growth

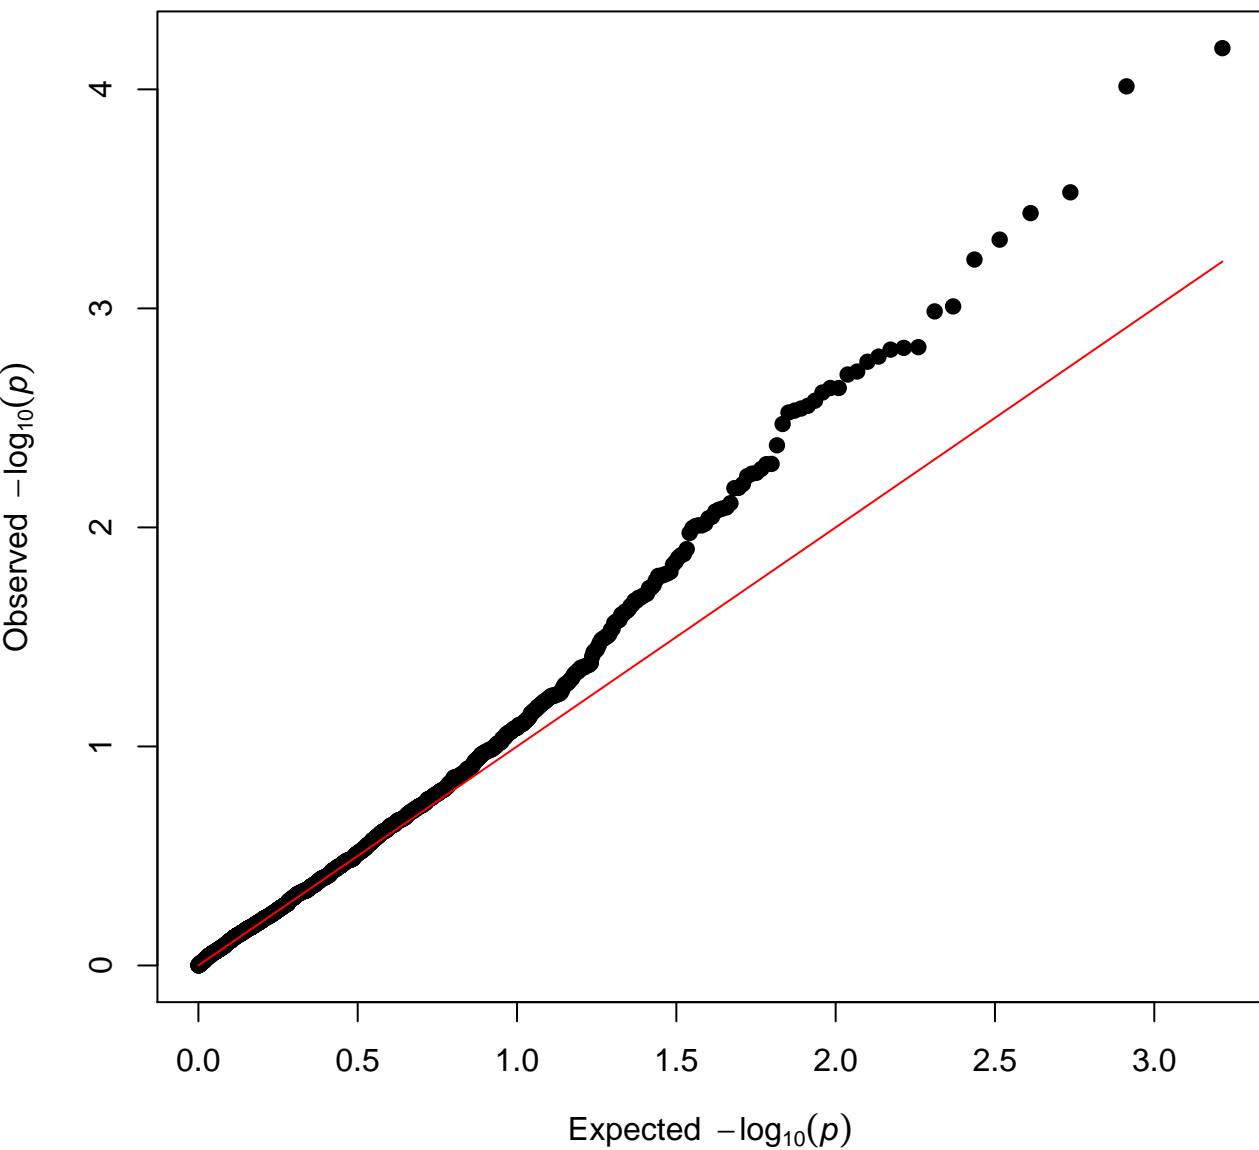

# LMM, X277\_Secondary.Dormancy

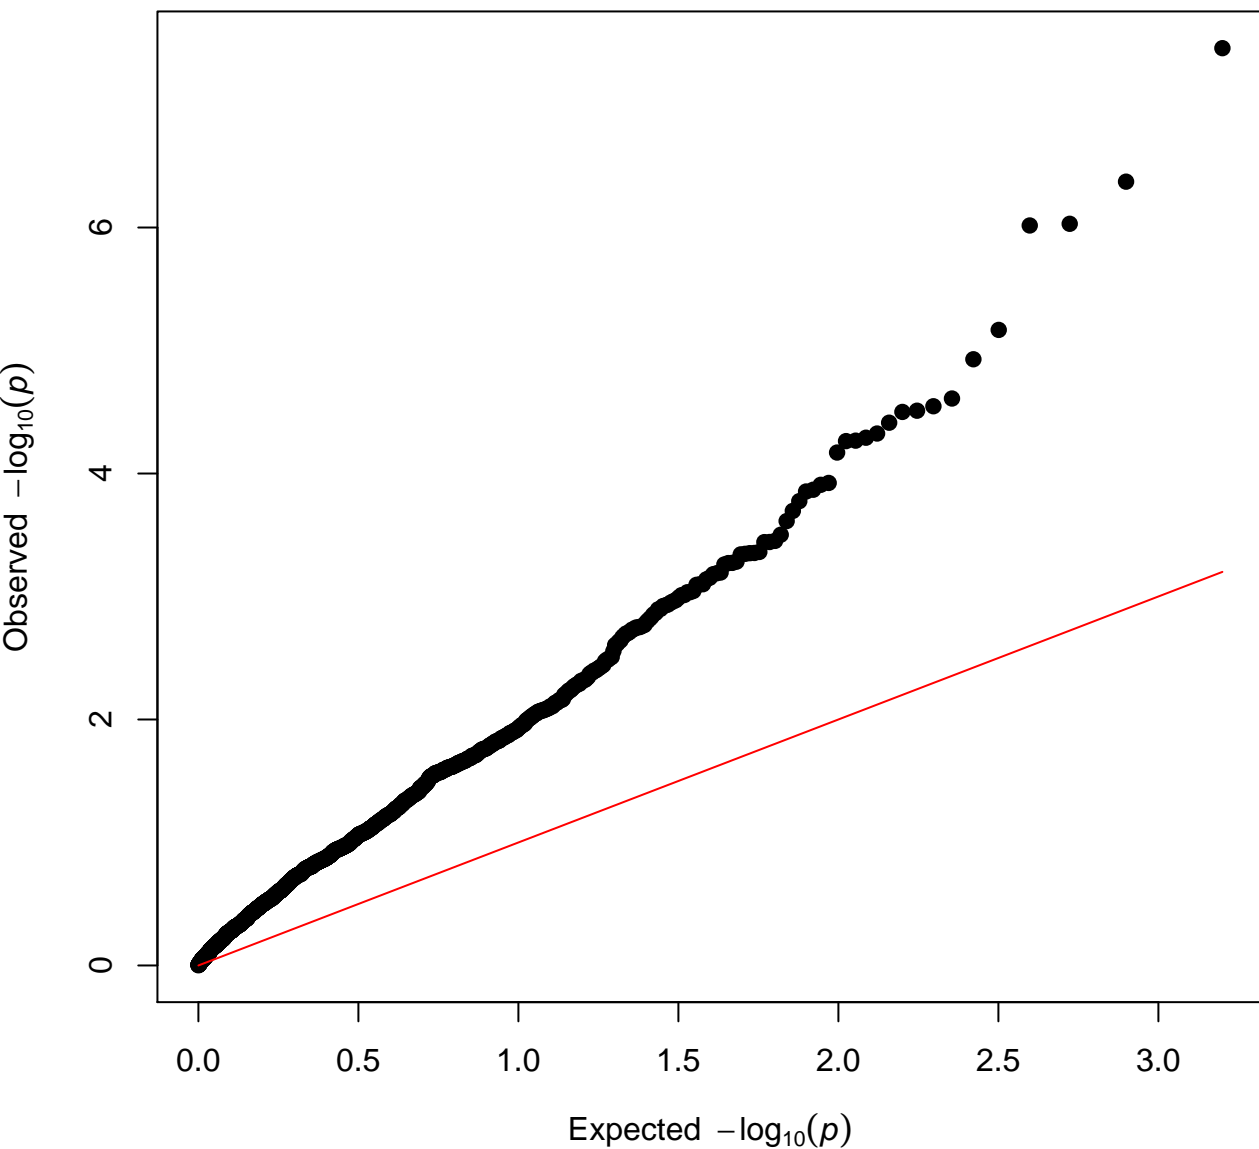

# LMM, X278\_Germ.in.dark

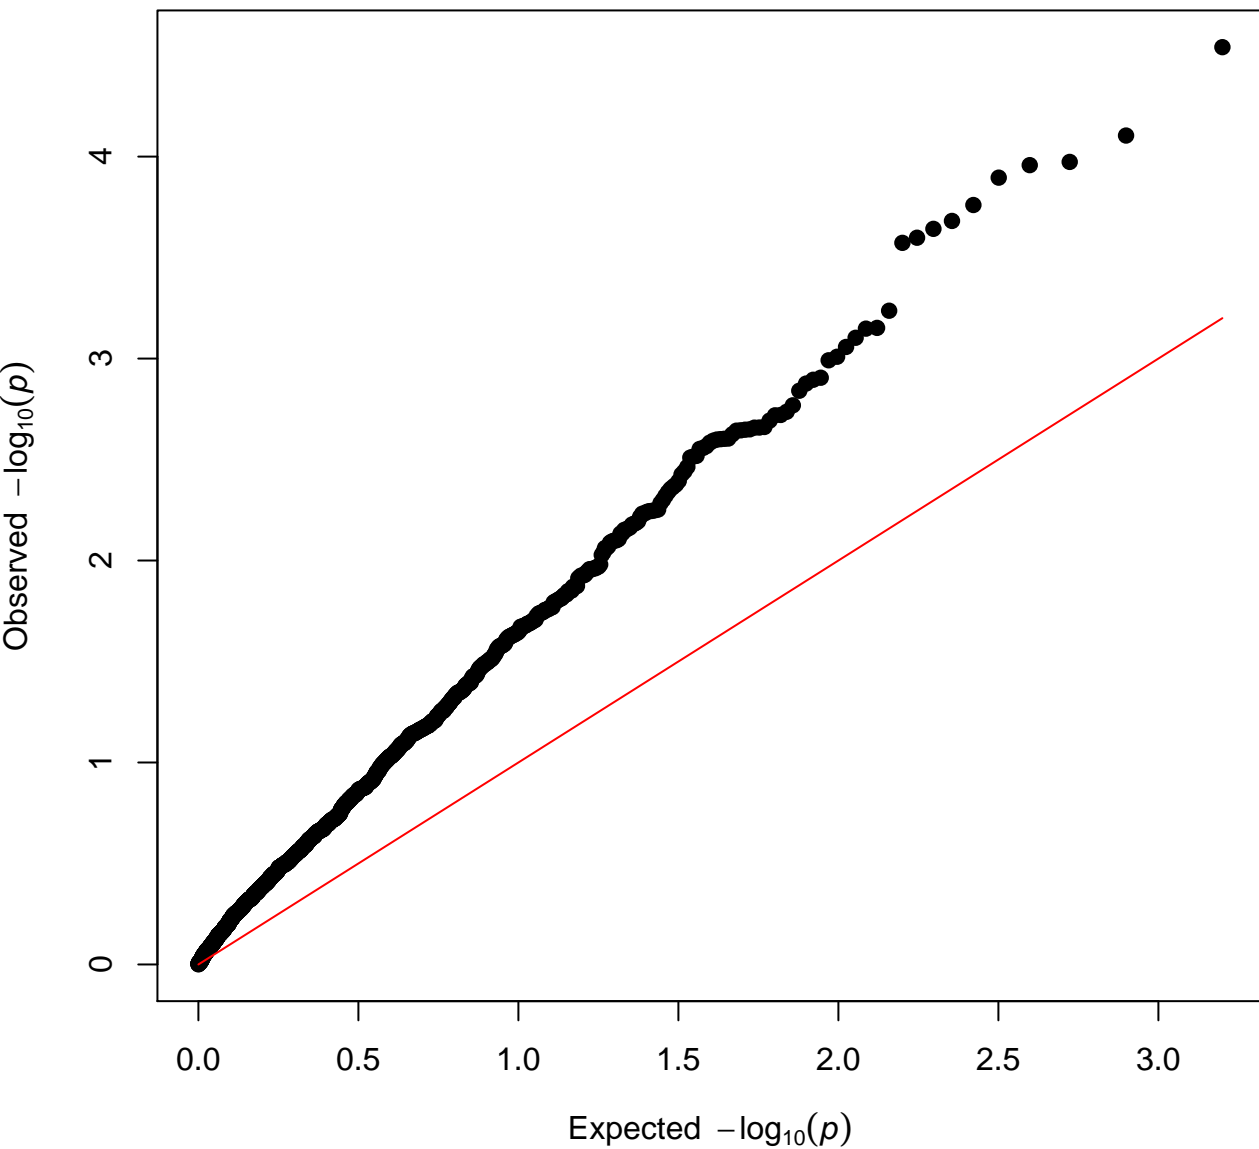

# LMM, X279\_DSDS50

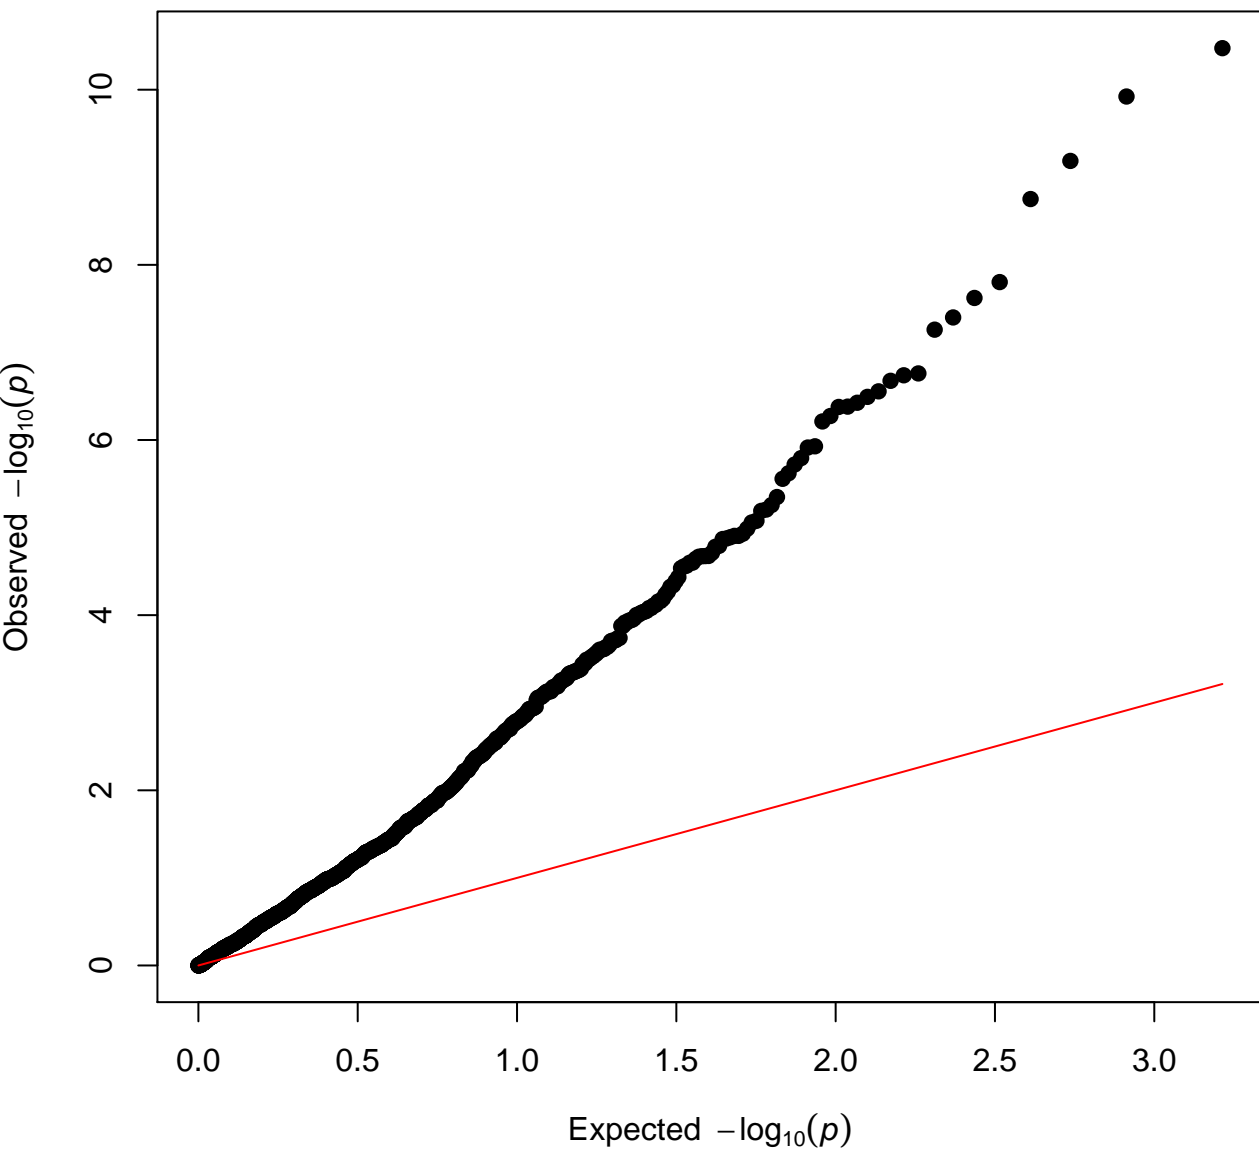

LMM, X281\_Storage.7.days

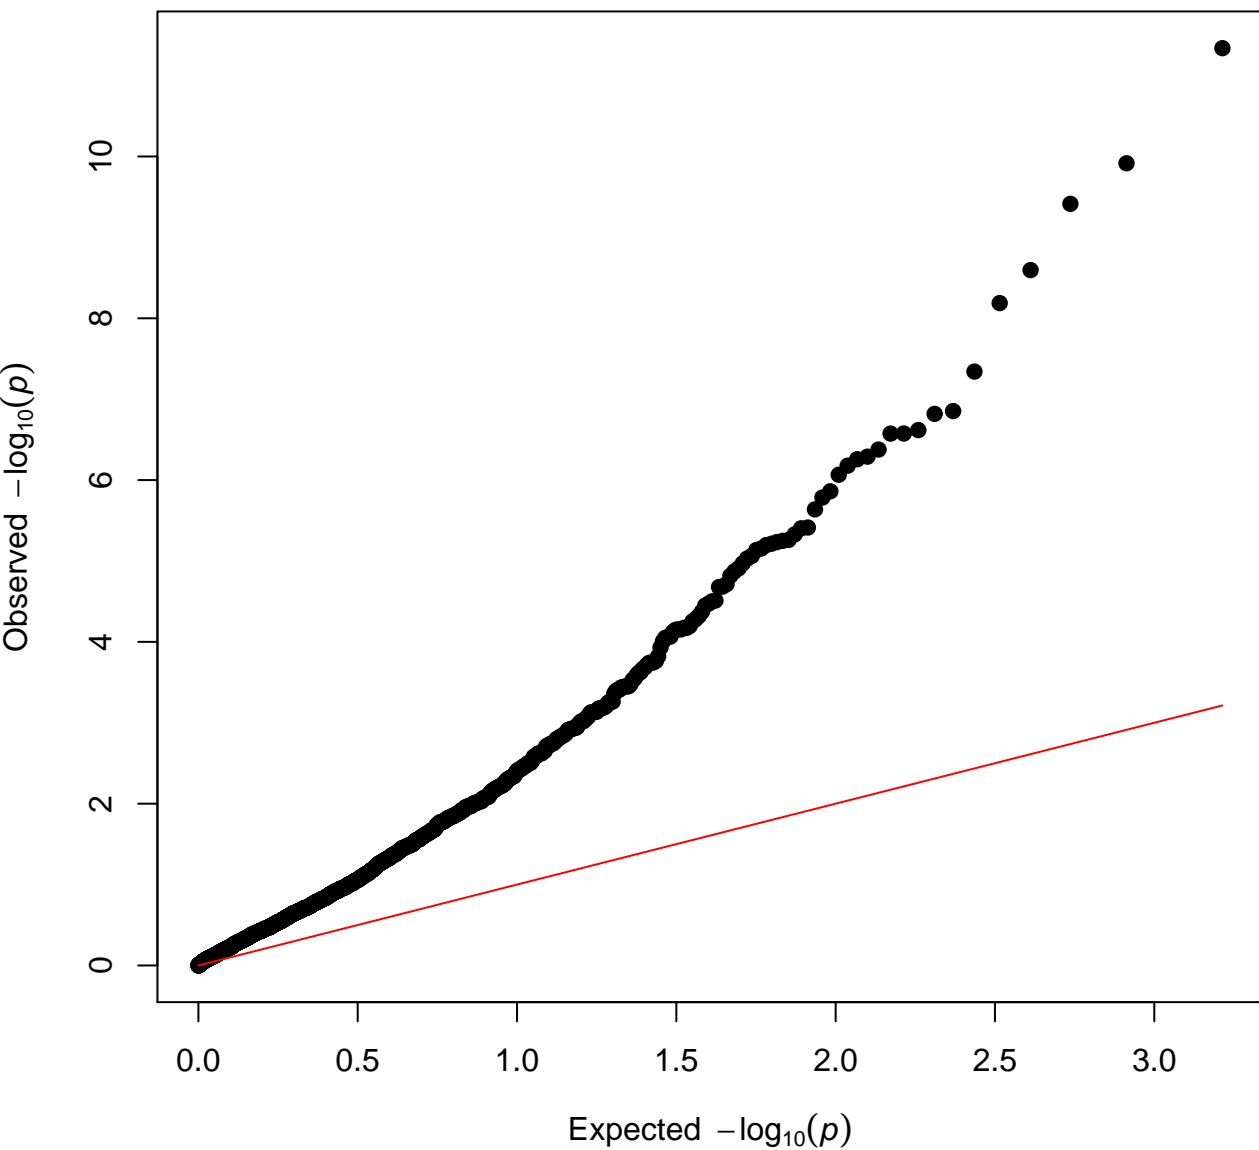

# LMM, X282\_Storage.28.days

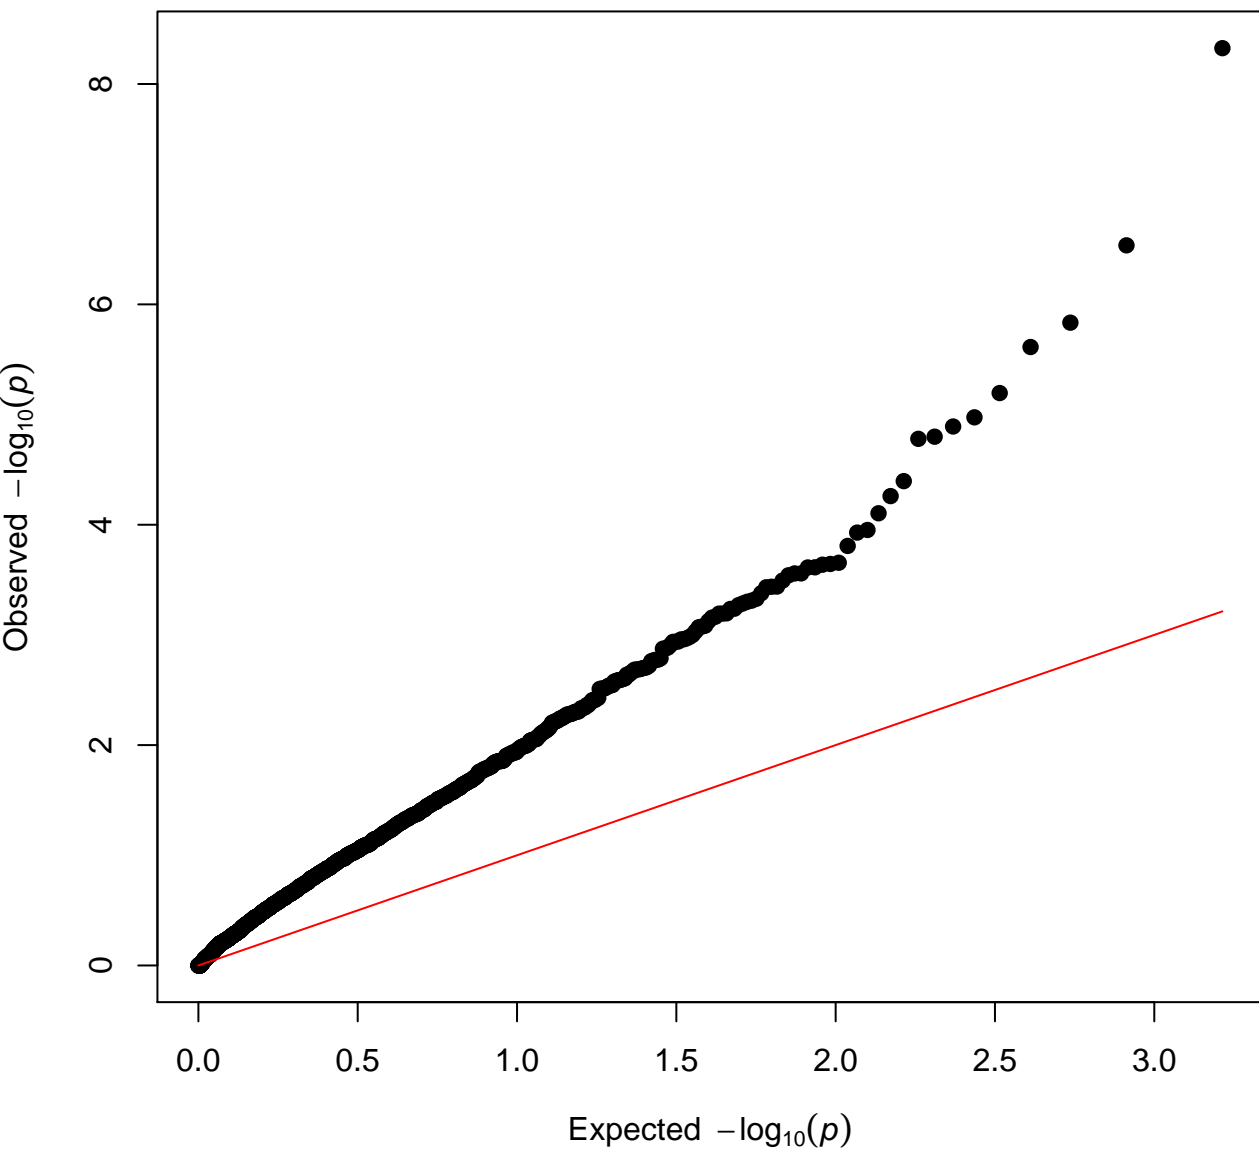

# LMM, X283\_Storage.56.days

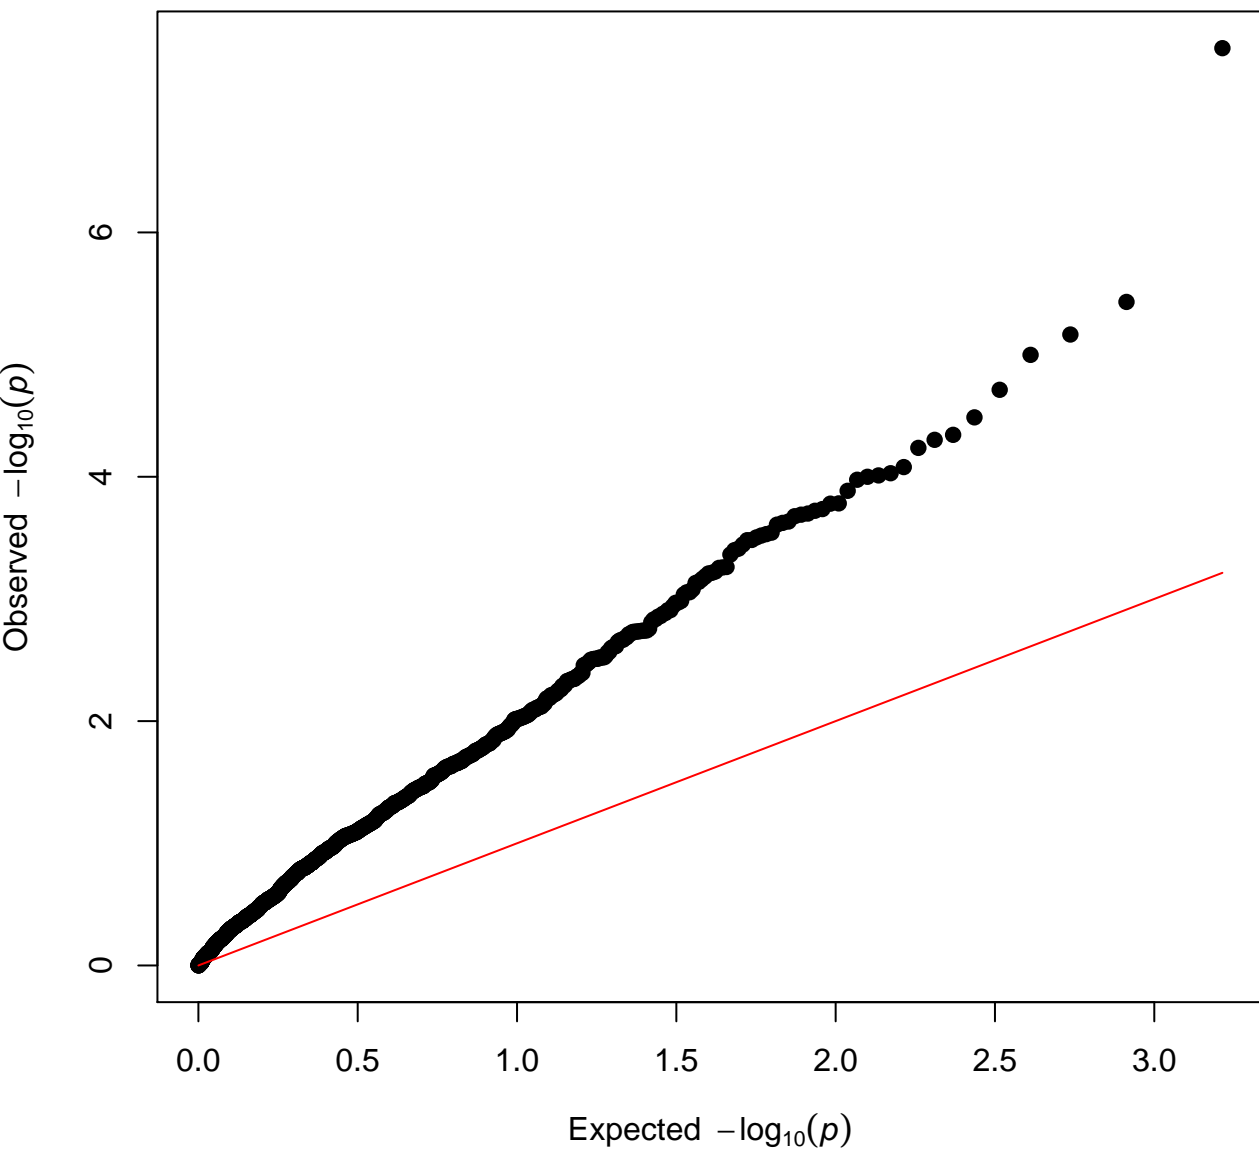

Supplement: Supplemental_File_S4.zip [file qqplot_mma_vs_pca_032017.pdf › Ath_STRs/output/qqplot_mma_vs_pca_032017.pdf]
