# Supplementary material for: Massive variation of short tandem repeats with functional consequences across strains of Arabidopsis thaliana
Source: PubMed Central journal article supplement — Genome Res. 2018 Aug;28(8):1169–78. doi: 10.1101/gr.231753.117 (PMC6071631; doi:10.1101/gr.231753.117), 2018-08
Supplement: supp_gr.231753.117_Supplemental_Material.pdf [file supp_gr.231753.117_Supplemental_Material.pdf]

**SUPPLEMENTAL NOTE**

*MIPSTR optimization and protocol updates.* We found that MIP captures were most robust using a previously reported MIP capture protocol (Hiatt *et al.* 2013). Additionally, we implemented changes in the computational pipeline that led to improvements. Specifically, we altered the synthetic references used for alignment to use fractional repeat numbers found in the reference rather than integer unit counts, as the fractions tend to be shared across different strains, and more than half of repeats are found in fractional copy number (*e.g.* CAGCAGCA, where the unit is CAG, would have copy number 2.66). Therefore, alignments could be subject to artificially induced gaps if integer copy numbers are used in the synthetic reference. Additionally, we found that the requirement that different MIP capture events (tag-defined read groups) be present at read counts greater than one was unnecessary, as indeed 91% of capture events for Col-0 STRs are represented in a single read with the current protocol. We relaxed this requirement to at least four reads representing at least two capture events.

*MIPSTR parameters.* The MIPSTR technique (Carlson *et al.* 2015) was originally developed for high stringency to compensate for anticipated high levels of technical error. However, many parameters of the MIPSTR computational pipeline were never evaluated quantitatively for their effect on performance. Specifically, it was unclear whether the sensitivity/specificity tradeoff for including reads in the analysis was optimized. Using data for the *Arabidopsis thaliana* reference strain Columbia (Col), we performed a scan across BWA algorithms, parameters, and alignment score thresholds that yielded the highest agreement with this high-quality dideoxy-based reference genome. For both maximal exact match (MEM) and Smith-Waterman algorithms, we varied gap open costs across values [0,1,2,4,6 (default)] and gap extend costs across values [0,1,2,4]. We found that MEM, open 2, extend 2 showed the best performance in the context of other default parameters. We then tested the mismatch cost at values [0,1,2,4], finding that overall accuracy was best at mismatch cost 1. Finally, we evaluated different alignment score cutoffs for filtering reads, across values [145,150,155,160]. We found that a mismatch cost of 1 and alignment score threshold

of 150 gave the largest overall number of correct genotypes, with some tolerance to deviation in any parameter (Supplemental Table S1).

*Accuracy of the method.* A dropout of ~15% of loci was largely attributable to inefficient MIP capture of abundant intergenic TA/AT dinucleotide STRs (Supplemental Fig. S1, S2). Comparing our genotype calls to the high-quality Columbia (Col-0) reference genome, we found that MIPSTR genotype calls were 96% accurate (Supplemental Fig. S3b). In contrast, a comparison of MIPSTR calls with a reference-guided draft assembly of the Bur-0 strain's genome (Gan *et al.* 2011) indicated that less than 1% of STR variation was accounted for in this assembly (Supplemental Fig. S3c). As third-generation sequencing technologies become cost-appropriate for population analyses, however, STR calls in new genome assemblies are likely to become substantially better (Chaisson *et al.* 2015). Dideoxy sequence analysis of a small STR set in four diverse strains showed an accuracy of 95% (Supplemental Fig. S3d). Technical reproducibility of genotype calls was extremely high (Supplemental Fig. S3e). Across the 96 *A. thaliana* strains, the average genotyping rate was 80% with a subset of dinucleotides accounting for most dropout (Supplemental Fig. S4a, S4b). Rarefaction analysis implied that many more STR alleles are expected with further sampling of *A. thaliana* strains (Supplemental Fig. S4c).

*STR annotation.* We used Araport11 (Cheng *et al.* 2017) to annotate STRs with overlapping genomic features as follows. We chose to require at least 50% overlap with any given feature, and as such features we considered genes and transposons. We used BEDTOOLS (Quinlan and Hall 2010) to find all such features for each STR. Given this overlap, we annotated each STR such that it had only one annotation among coding/intron/UTR/intergenic using the following logic, because Araport did not provide unambiguous mappings. We annotated as 'intergenic' all STRs which did not overlap with a gene, or which overlapped with a pseudogene, or a transposable element gene, or a large segment (>200bp) annotated as transposable element. (Of the 158 STRs falling in such transposable element regions, only 46 overlapped with a TE gene). This

left only STRs overlapping with genes. We annotated as ‘coding’ all genic STRs overlapping with the annotation ‘CDS’ from any transcript of any gene. We annotated as ‘intronic’ all genic STRs which had the annotation ‘protein’ but did not overlap with a CDS. We annotated as ‘UTR’ all genes overlapping with 5’/3’ UTRs or other transcript regions. This meant that some ambiguous annotations, for instance noncoding RNA genes, were annotated as UTRs (which is technically true). Spot checking indicated that this approach gave reasonably accurate results; we found no inconsistencies in extensive manual data checks. We further used BEDTOOLS to compare STR loci to seven different DNaseI-seq experiments in *A. thaliana* strain Col-0 (Sullivan *et al.* 2014). These included: whole 7 day seedlings; root hair cells only; whole root; root non-hair cells only; seed coat at 4 days post anthesis; opened flowers only; non-opened flowers only. We downloaded these datasets from <http://plantregulome.org/> on March 13<sup>th</sup>, 2017. We recorded the number of DNaseI hypersensitive sites (DHS) overlapping at least 50% with each STR. For purposes of analysis, we considered all STRs overlapping with a DHS in at least one tissue to have a DHS.

*Bur-0 genome comparisons.* To compare our STR genotype calls to a draft genome of the Bur-0 strain (Gan *et al.* 2011), we considered all indels of this draft genome relative to the Col-0 reference that overlapped with MIP-targeted STR regions. This yielded a short list of variants, which we manually compared to our own STR variant calls (Supplemental Figure S3c).

*Analysis of expanded STRs.* To detect modestly expanded STRs, we used a simple metric to determine, for each STR, whether its allele size distribution showed evidence of substantial positive outliers. This was accomplished by estimating the median of the allele distribution, and computing the relative distance of the maximum allele size from the median allele size. STRs that showed expansions had higher rates of missing data (20% vs. 15% missing for comparable STRs;  $p = 0.0009$ , U-test). To understand the functional consequences of these modest expansions, we assayed gene expression in selected diverse *A. thaliana* strains representing various intronic expansions and

controls. We designed primers flanking STR-residing introns, along with primers bridging other exon-exon junctions where possible. We investigated potential splicing irregularities by reverse-transcription PCR (RT-PCR) and agarose gel electrophoresis, followed by gel purification and dideoxy sequencing of relevant RT-PCR amplicons (Supplemental Figure S6).

In three of six cases, for genes *NTM1*, *AT1G30540* and *AT1G24145*, we found that intronic expansions were associated with splicing irregularities (Supplemental Figure S6a,b). We did not formally establish a causal relationship between splice defects and STR expansions. In all three cases of splice defects, there are additional mutations in the intron. In one case, *AT1G24145*, there is a splice-site-disrupting mutation in Kz-9 explaining the partial intron retention (but not the whole intron retentions in other strains, Supplemental Figure S6a); in the case of *AT1G30540*, there is a ~600bp insertion in the intron. As there is no reliable way to establish the ordering of these mutations, these STR expansions may result from relaxed selection on the introns in question.

Nonetheless, these associations suggest that STR expansions may be a sign of such splicing irregularities, as in each case all relevant polymorphisms in intron sequences were absent from the 1001 Genomes resource (Alonso-Blanco *et al.* 2016). It is further noteworthy that normally-spliced transcripts appear to be present in all cases at some level, though we cannot judge relative quantities of normal vs. aberrantly spliced products. We additionally measured transcript abundance of selected expansion-associated genes relative to control gene *UBC21*, with mixed results. In contrast to *MEE36* (Figure 2f), we found no evidence of effects of another expansion, in the 5' UTR of the *CaM1* gene, on expression of *CaM1* by qRT-PCR (data not shown).

*Inference of selection on STRs.* We used a bootstrap-aggregation (bagging) procedure as described in the main text and Methods to learn an ensemble model for predicting the expected degree of allelic variation in each STR. We estimated STR variability estimated using two complementary measures: 1) the base-10 logarithm of the standard deviation of an STR's unit copy number across all alleles ( $\log(\text{SD})$ ), and 2) the Shannon entropy of the allele distribution for each STR (computed using the *infotheo* package

(Meyer 2014)). Predictions about variation based on each measure were performed, but  $\log(\text{SD})$  was ultimately used for all inference as following a more tractable distribution of STR variation (Supplemental Fig. S8). Features used to predict each STR's expected neutral variation included STR purity (in Col-0), median unit copy number, STR unit length, STR GC content, and GC content of the MIP-captured region. Features discarded from analysis included MIP targeting and ligation arm GC content, chromosome, and chromosomal position. 1000 bootstrapped SVR models, each trained on a randomly sampled 25% of intergenic STRs, were then used to make predictions about the variability of each STR, yielding a distribution of 1000 predictions for the variability of each STR. While we cannot necessarily expect that all intergenic STRs are free of selective influence, they should at the least be strongly enriched for neutrally evolving STRs relative to other STRs, and they thus represent a reasonable approximation to a neutral model for STR variability. We compared two different approaches to predicting variability of the entire set of STRs from intergenic STR variation, support vector regression (SVR) and simple linear regression with cross-validation (Supplemental Figure S9a, S9b). We found that while both methods performed similarly on gene-associated STRs, SVR models showed somewhat better fit to intergenic STRs, specifically demonstrating a more or less linear fit between predictions and true values. However, improved fit could have been due to overfitting, so we used bootstrap aggregation (bagging) to ensure that predictions were robust and to describe a distribution of predictions (Supplemental Figure S9c). These bagging results were similar to cross-validation alone, though predictions on intergenic STRs showed slightly worse fit, consistent with ameliorated overfitting. Notably, we replicate our past observation (with a much smaller dataset) that coding STRs showed a rather lower correlation with expected variability than noncoding STRs (Carlson *et al.* 2015) (Supplemental Figure S9a, S9b, S9c). These collected results suggest that intergenic STRs are a reasonably good model for neutral STR variation. Finally, there was no substantial evidence for a correlation of bias in inferences of selection made from this model with the response variable (Supplemental Figure S9d). Predictions were not substantially different when the entire STR set was used for bagging (instead of

intergenic STRs alone; Supplemental Figure S9e), arguing that intergenic STRs alone are fairly representative as a training set. Using all STRs for bagging also yielded qualitatively similar inferences about constraint; for example, coding STRs still show elevated signatures of constraint compared to other STR classes (Supplemental Figure S9f). Also, this argues that overfitting did not meaningfully affect predictions on genic STRs made from a model fit to only intergenic STRs. The most informative features of the SVR model (fit to intergenic STRs) were the median STR copy number across strains, GC content of the MIP capture region, and the size of the STR unit (Supplemental Figure S10). We make a series of observations about constrained and hypervariable STRs in the main text and at Supplemental Figure S11 and Supplemental Table S2.

In the main text, we note that 3/24 coding STRs found to be hypervariable relative to SVR predictions encoded polyserines in F-box proteins. Further, two such polyserines were at the extreme N-terminus of the protein. While STRs prefer the N and C-terminal regions of coding sequences (Huntley and Clark 2007), there is modest evidence that this tendency is more marked in hypervariable coding STRs than those under purifying selection (odds ratio = 2.8,  $p = 0.050$ , Fisher's Exact Test). Potentially these regions of proteins are under relaxed selection, yielding opportunities for functional adaptation. Across both coding and noncoding STRs, STR motifs generally matched background patterns (Supplemental Figure S11).

*Detection of STR-phenotype associations and effect size estimation.* There is not a well-established framework for detecting associations between STR genotypes and phenotype, and thus such analyses have tended to operate on an *ad hoc* basis (Mackay *et al.* 2012; Carlson *et al.* 2015; Press *et al.* 2014; Gymrek *et al.* 2015). We chose a linear mixed model as a relatively conservative analysis, which allowed us to account for population structure to some extent, and also maintained a certain degree of parsimony. However, we chose to model STR alleles as categorical variables, because there is no generalizable functional reason why STR allele length should necessarily

show a linear association with phenotype (and there are known counterexamples in which it does not) (Press *et al.* 2014). While it may reduce power somewhat, this approach allows us to make fewer assumptions about the nature of the genotype-phenotype map. There is some evidence that the overall approach shows inflation for some, but not all, phenotypes (Supplemental Figure S13). However, this apparent inflation disappears when genotypes are randomized, indicating that the model itself is not obviously mis-specified with respect to e.g. population structure. Notably, this pattern has been observed previously in STR-phenotype association tests (Gymrek *et al.* 2015). In contrast, simple tests that do not correct for population structure give clearly inflated p-value distributions for STR-phenotype associations (data not shown). It could be that STRs are a more sensitive readout of population structure than the traditional SNPs of genome-wide association studies, which cannot be accounted for by identity-by-state summary statistics. This topic deserves further study in the future, as analyses of STR data are likely to become routine with the influx of new technologies. Nonetheless, for the purposes of this study, follow-up validation experiments (Supplemental Fig S16) indicate that we do detect meaningful STR-phenotype associations with our tests, even if these tests are merely heuristic.

We additionally performed an ANOVA on residual variance in the phenotype days to flowering, long days, after adjusting for the random effect of population structure (Supplemental Table S7). Using this admittedly naïve technique, we find that the sums of squares associated with STR loci are larger than those associated with SNP loci. This observation is rather surprising, given that the SNP loci are generally well-known and well-described contributors to flowering variation (Atwell *et al.* 2010), whereas the STRs are much less well understood. Furthermore, in the context of the Type II ANOVA (where each factor's contribution is estimated only after fitting all other factors), none of the loci are nominally significant at the 5% level. We therefore treat this result with caution, but nonetheless consider that it may be informative, pending validation in other systems and better functional characterization of the STR loci.

## SUPPORTING FIGURES

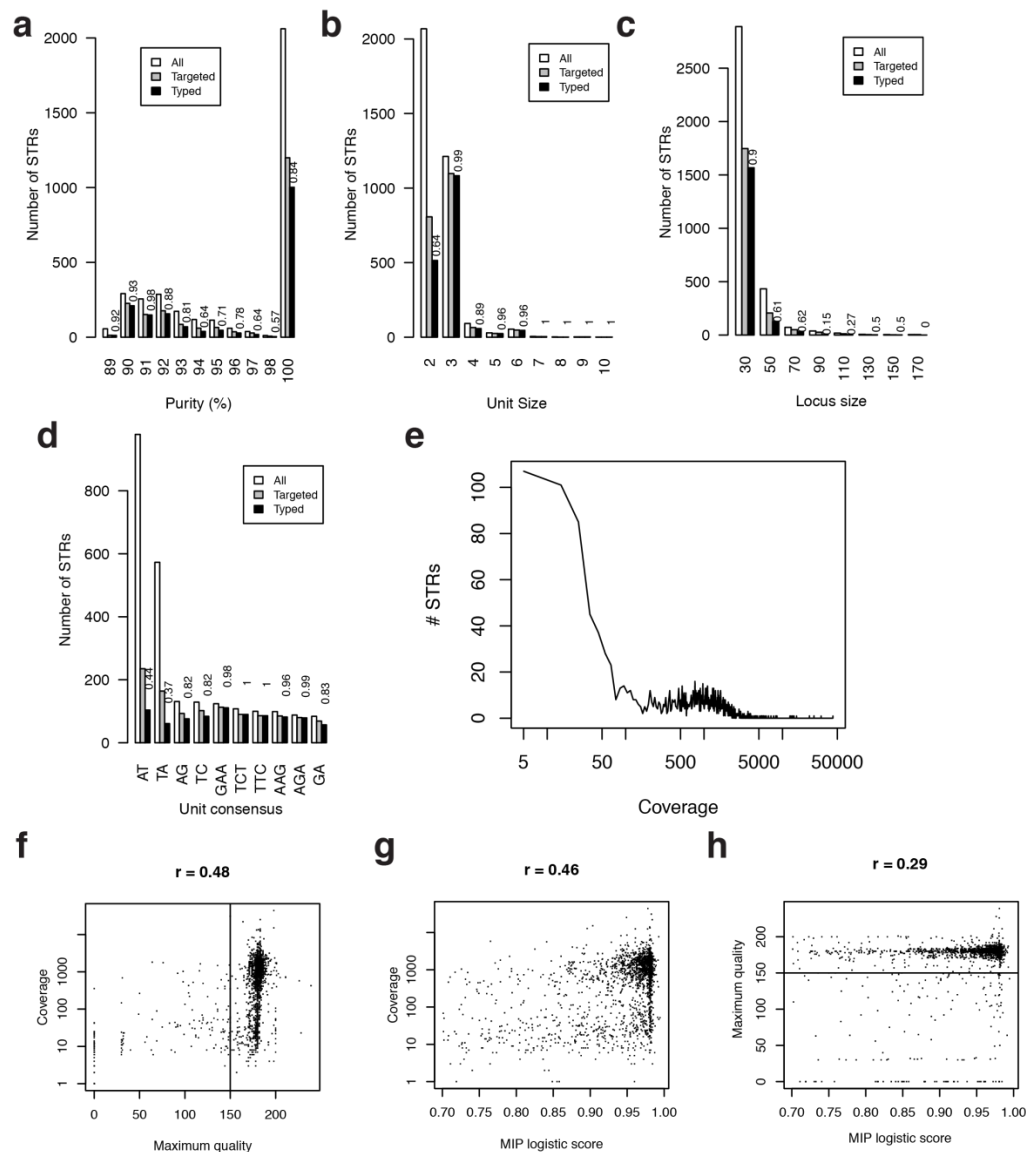

**Supplemental Fig. S1. Ascertainment of STRs is related to various STR qualities, sequencing coverage, and MIP features.** Distribution and ascertainment of STRs by: (a): STR purity, (b): consensus unit size, (c): overall STR locus size, and (d): unit consensus sequence. For (a-d): “All”: all STRs which match the definition of target STRs (in the reference genome) for this study, e.g.  $\leq 180$  bp length in TAIR10,  $\geq 89\%$  purity in TAIR10, 2-10 bp nucleotide motif. “Targeted”: the 2046 STRs which were targeted by an explicitly designed MIP. “Typed”: STRs successfully genotyped in the Col-0 reference genome in a MIPSTR assay. Numbers above bars indicate the proportion of targeted STRs in the relevant category that were successfully genotyped. (e): coverage distribution across all targeted STRs (note log scale on X axis). (f-h): relationships of coverage, maximum read alignment score (“quality”) at each locus, and MIPGEN(Boyle et al. 2014) locus logistic score. For (f-h): solid lines indicate the alignment score threshold used; Pearson correlation of the plotted quantities is displayed above each plot.



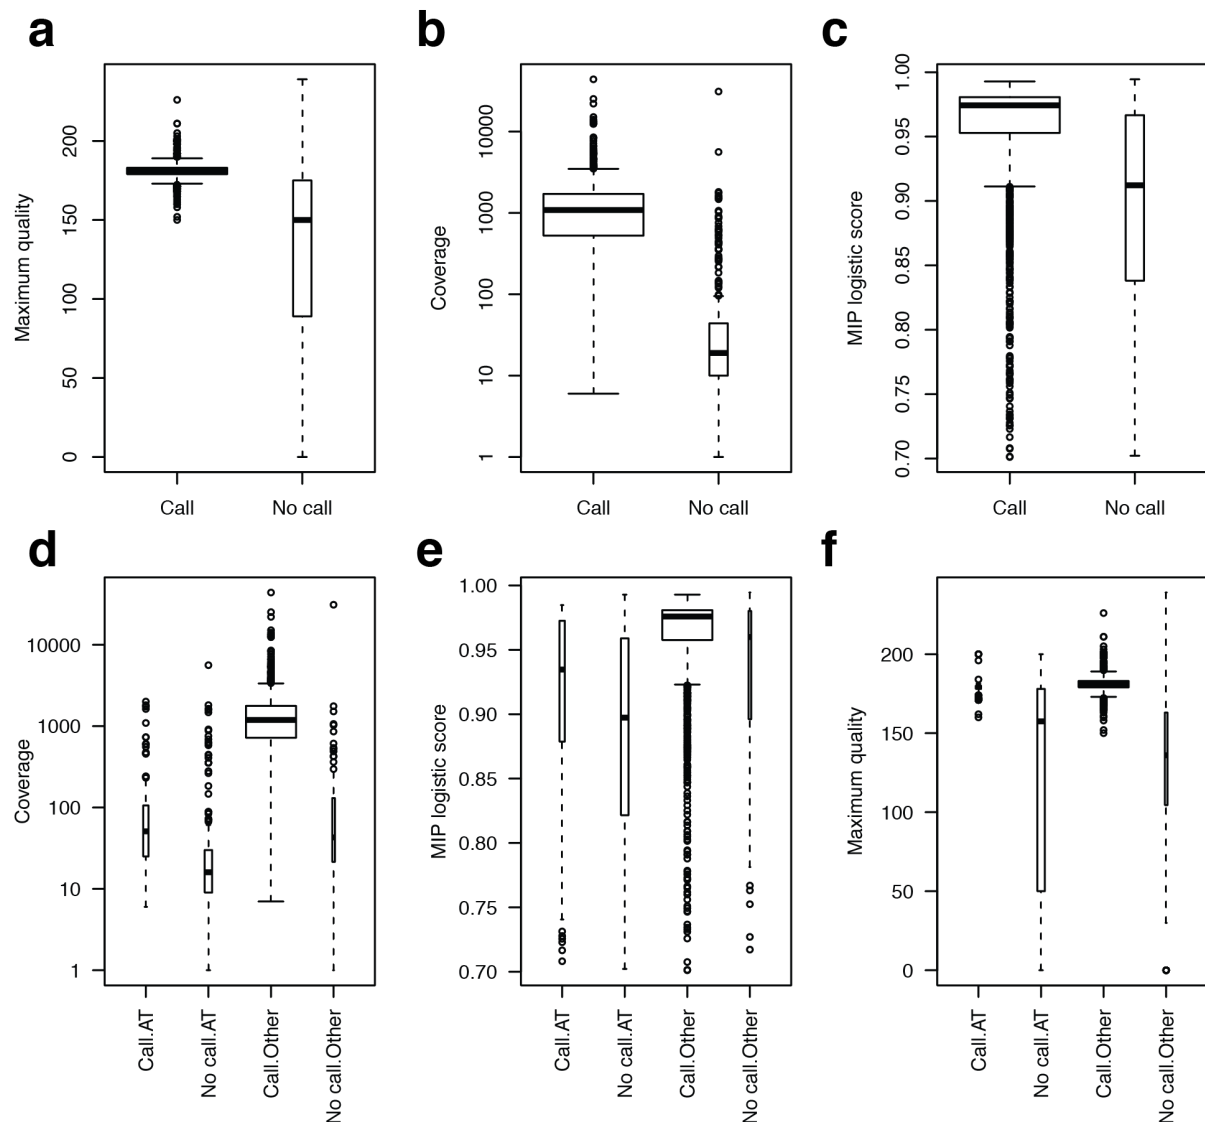

**Supplemental Fig. S2. Coverage differences explain MIP dropout and are associated with [AT]<sub>n</sub> dinucleotide STR loci.** (a-c): differences between STR loci with genotype calls and loci without calls for various technical quantities. (d-f): Similar to (a-c), but breaking down also by whether the targeted STR locus is an [AT]<sub>n</sub> dinucleotide. In all boxplots, widths are scaled to the number of observations in each category.

**a**

| STR locus | 28753 |     |     |     |     | 52814 |      |      |     |      | 81231 |     |     |     |     |
|-----------|-------|-----|-----|-----|-----|-------|------|------|-----|------|-------|-----|-----|-----|-----|
| Strain    | Col   | Bay | Cvi | Tsu | Uod | Col   | Bay  | Cvi  | Tsu | Uod  | Col   | Bay | Cvi | Tsu | Uod |
| 1001G     | 7     | NA  | 7   | 7   | 7   | 9.7   | NA   | 9.7  | 4.7 | 9.7  | 19    | NA  | 19  | 7   | 19  |
| MIPSTR    | 7     | 22  | 9   | 16  | 21  | 9.7   | 10.7 | 25.7 | 4.7 | 11.7 | 19    | 29  | 15  | 7   | 27  |

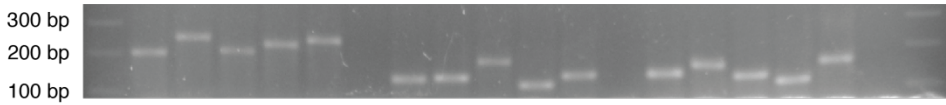

| STR locus | 78534 |      |      |      |      | 25822 |      |      |      |      |
|-----------|-------|------|------|------|------|-------|------|------|------|------|
| Strain    | Col   | Bay  | Cvi  | Tsu  | Uod  | Col   | Bay  | Cvi  | Tsu  | Uod  |
| 1001G     | 11.3  | 11.3 | 11.3 | 11.3 | 11.3 | 8.7   | NA   | 8.7  | 8.7  | 7.7  |
| MIPSTR    | 11.3  | 10.3 | 17.3 | 17.3 | 8.3  | 8.7   | 28.7 | 29.7 | 26.7 | 29.7 |

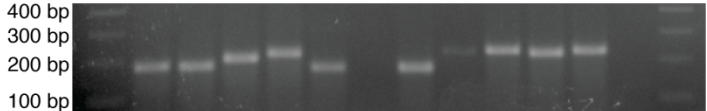

**b**

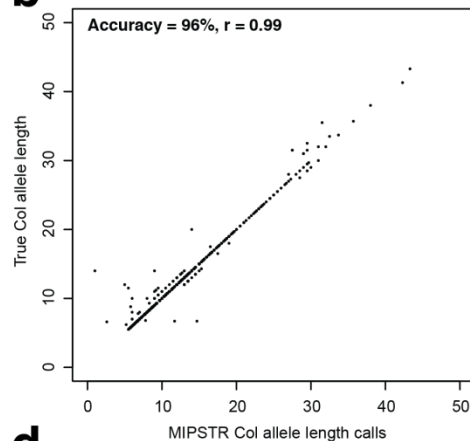

**c**

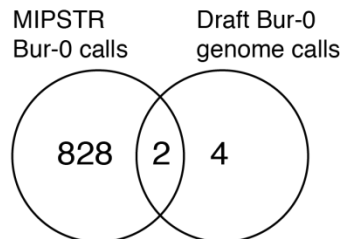

**d**

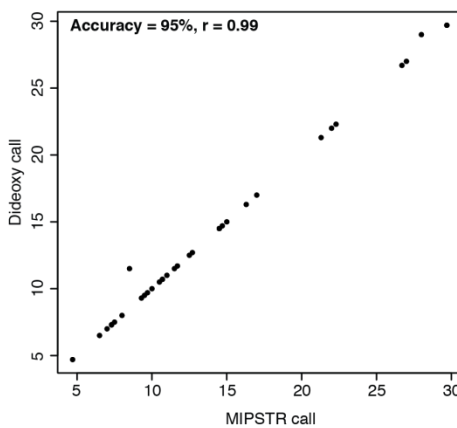

**e**

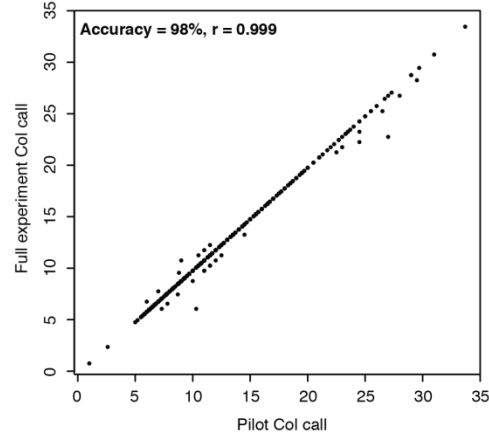

**Supplemental Fig. S3. MIPSTR method makes accurate, reproducible calls in diverse *Arabidopsis thaliana* strains.** (A): MIPSTR allele calls at five STR loci agree with amplified fragment length polymorphism data and reveal reference bias for STRs in the 1001 Genomes resource database (1001G) across five diverse *A. thaliana* strains. NA: no genotype call; red text indicates incorrect 1001G allele calls. (B, D, E): Comparison of MIPSTR calls with other data sources or between experiments. Accuracy = percentage of alleles called in both data sources (B: TAIR10 reference genome, D: dideoxy sequencing of diverse strains, E: different MIPSTR

experiments) that agree;  $r$  = Pearson correlation coefficient for allele length between data sources. (C): Comparison of STR polymorphisms (relative to Col) in the Bur-0 strain in a draft genome assembly (Cao *et al.* 2011) and from MIPSTR (this study). The four variants called in the draft assembly but not by MIPSTR are marked as missing genotypes by MIPSTR, not reference genotypes. (D): STRs in strains Col, Bay-0, Cvi-0, Tsu-1, Uod-7 genotyped by dideoxy sequencing,  $n=37$  total after omitting missing genotypes. (E): Technical variation in MIPSTR calls between independently generated libraries of a small pilot experiment at low plexity (5 libraries) on a MiSeq instrument and the full experiment at high plexity (96 libraries) on a NextSeq instrument.

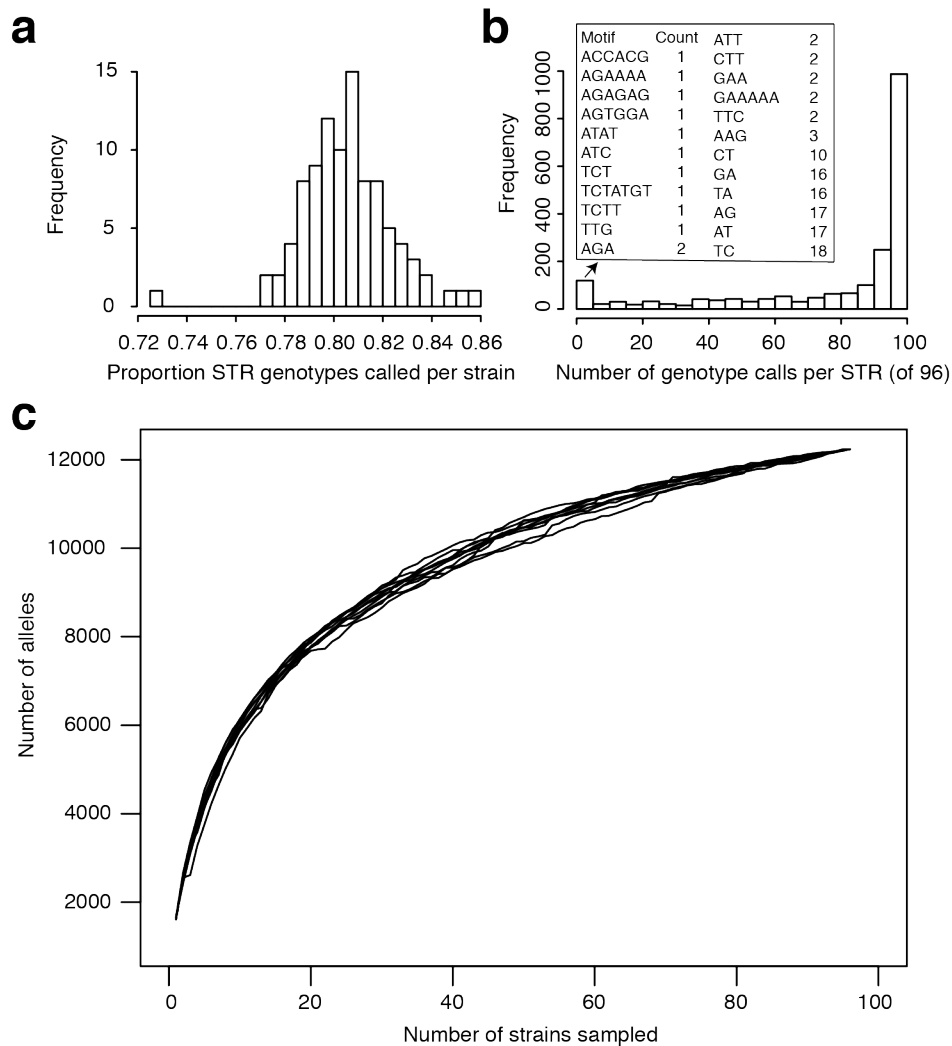

**Supplemental Fig. S4. Ascertainment of STRs by MIPSTR.** (A): Number of STR genotypes called per strain is consistent across strains. (B): Number of calls per STR shows most STRs are highly ascertained. Inset table represents the the STR motif composition of STRs in the 0-5 bin of the histogram. (C): Rarefaction analysis indicates a failure to saturate new STR alleles in the current sample of strains, indicating further diversity. Five different rarefaction samples are shown as curves.

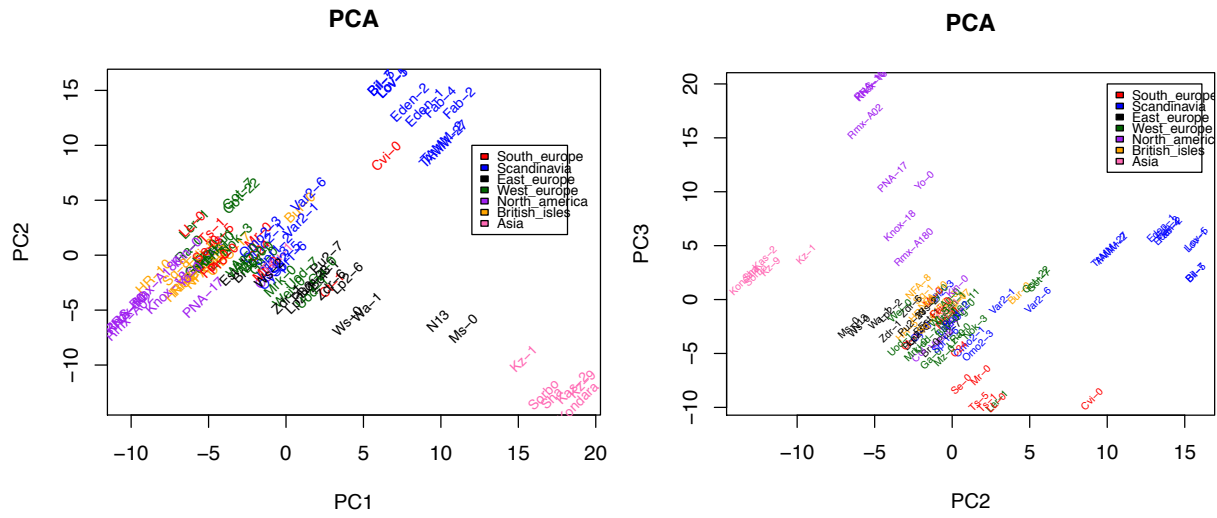

**Supplemental Fig. S5. Principal component analysis of STR variation reveals demographic history.** (A): Same as Figure 1C, but with strain names. (B): PC2 plotted against PC3 reveals additional structure.

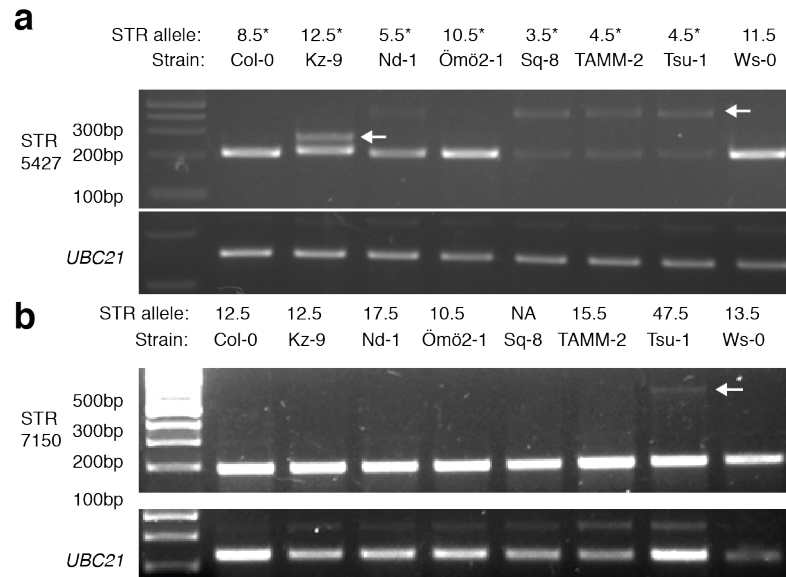

**Supplemental Fig. S6. Additional molecular phenotypes associated with STR modest expansions.** (a, b): STR-associated aberrant splicing detected by RT-PCR on cDNAs from indicated strains. White arrows indicate aberrant splice forms (whole or partial intron retention). For each sample, separate reactions with primers targeting *UBC21* transcripts were performed alongside as a control. One of two to three similar biological replicates is shown. (a): Splicing of the STR-bearing intron of *AT1G24145*. \*: Indicated STR allele is inferred from dideoxy sequencing, having a missing genotype from MIPSTR. (b): Splicing of the STR-bearing intron of *AT1G30540*. High molecular weight of the aberrant form is due to an apparent large (non-STR) insertion in the intron, indicated by dideoxy sequencing and PCR from genomic DNA.

**a**

```

TAIR10_gDNA GAGTCACAAACCCAGCAAGGATTTGCCTAgtaagtttattatgaatgatc
Mr-0_cDNA GANTCACAAACCCAGCAAGGATTTGCCTAgtaagtttattatgaatgatc
TAIR10_cDNA GAGTCACAAACCCAGCAAGGATTTGCCTA-----

TAIR10_gDNA ttgatctgtctctcttttgatcatcat---cgatcatttctaatttggg
Mr-0_cDNA ttgatctgtctctcttttgatcatcatcatcgatcatttctaatttggg
TAIR10_cDNA -----

TAIR10_gDNA ttctt---tctggtgtgtgtgtgtgtt-----
Mr-0_cDNA ttcttctctctgtgtgtgtgtgtgtgtgtgtgtgtgtgtgtgtgtgtt
TAIR10_cDNA -----

TAIR10_gDNA -----gctgctgcagAGTTAGCTAGGATCCAATCGGAAGATCT
Mr-0_cDNA gttgtgtgtgtgtgtgtgtgcagAGTTAGCTAGGATCCAATCGGAAGATCT
TAIR10_cDNA -----AGTTAGCTAGGATCCAATCGGAAGATCT

TAIR10_gDNA TGAATGGTATTCTCTCTCCGATTGAGTACACGAACCCGAATAAGATGA
Mr-0_cDNA TGAATGGTATTCTCTCTCCGATTGAGTACACGAACCCGAATCAGATGA
TAIR10_cDNA TGAATGGTATTCTCTCTCCGATTGAGTACACGAACCCGAATAAGATGA

TAIR10_gDNA AAATGAAGAGGACGACAGGTTCTGGGTTTGGAAAACCTACTGGTGTGAT
Mr-0_cDNA AAATGAAGAGGACGACAGGTTCTGGGTTTGGAAAACCTACTGGTGTGAT
TAIR10_cDNA AAATGAAGAGGACGACAGGTTCTGGGTTTGGAAAACCTACTGGTGTGAT

TAIR10_gDNA CGGGAAATTAGGGATAAAAGAGGAAATGGTGTGTGATAGGGATTAAGAA
Mr-0_cDNA CGGGAAATTAGGGATAAAAGAGGAAATGGTGTGTGATAGGGATTAAGAA
TAIR10_cDNA CGGGAAATTAGGGATAAAAGAGGAAATGGTGTGTGATAGGGATTAAGAA

TAIR10_gDNA GACGCTTGTGTACCATGAAGGTAAGAGTCCCTCATGGAGTTAGAACTCCTT
Mr-0_cDNA GACGCTTGTGTACCATGAAGGTAAGAGTCCCTCATGGAGTTAGAACTCCTT
TAIR10_cDNA GACGCTTGTGTACCATGAAGGTAAGAGTCCCTCATGGAGTTAGAACTCCTT

TAIR10_gDNA GGGTT
Mr-0_cDNA GGGTT
TAIR10_cDNA GGGTT

```

**b**

```

NTM1_full MMKGLIGYRFSPTGEEVINHYLKNKLLGKYWLVEAISEINILSHKPSKD
NTM1_Mr0_cDNA MMKGLIGYRFSPTGEEVINHYLKNKLLGKYWLVEAISEINILSHKPSKD

NTM1_full LPKLARIQSEDLWEYFFSPIEYTNPNKMKMRTTGSFGWKPTGVDREIRD
NTM1_nosplice LPSKFMNDLDELFLVSSSIISKFGFFLLLLLLLLLLLLLLLLLLLLLQ

NTM1_full KRNGVIVIGIKKTLVYHEGKSPHGVRTPWVMHEYHITCLPHHKRYVVCQ
NTM1_nosplice SX-----

NTM1_full VKYKGEAAEISYEPSPSLVSDSHTVIAITGEPEPELQVEQPGKENLLGMS
NTM1_nosplice -----

NTM1_full VDDLIEPMNQEEEPQGPLAPNDDEFIRGLRHVDRGTVEYLFANEENMDG
NTM1_nosplice -----

NTM1_full LSMNDLRIPMIVQQEDLSEWEGFNADTFFSDNNNNYLNHVLQTPYGDG
NTM1_nosplice -----

NTM1_full YLNAFSGYNEGNPPDHELMQENRNDHMPRKPVTGTIDYSSDSGSDAGSI
NTM1_nosplice -----

NTM1_full STTSYQGTSSPNISVGSSSRHLSSCSSTDSCKDLQCTDPSIISREIREL
NTM1_nosplice -----

NTM1_full TQEVKQEIIPRAVDAPMNNESLVKTEKKGLFIVEDAMERNRKKPRFIYLM
NTM1_nosplice -----

NTM1_full KMIIGNIISVLLPVKRLIPVKKLX
NTM1_nosplice -----

```

**Supplemental Fig. S7. *NTM1* STR-associated intron retention in the Mr-0 strain is predicted to lead to a nonsense mutation.** (a): Alignment of the TAIR10 reference gDNA and cDNA sequences in *NTM1* and dideoxy sequencing results of the region around the STR-containing intron from the Mr-0 *A. thaliana* strain. (b): *In silico* translation of the *NTM1* dideoxy sequencing results, with and without splicing the intron (and assuming no further variation).

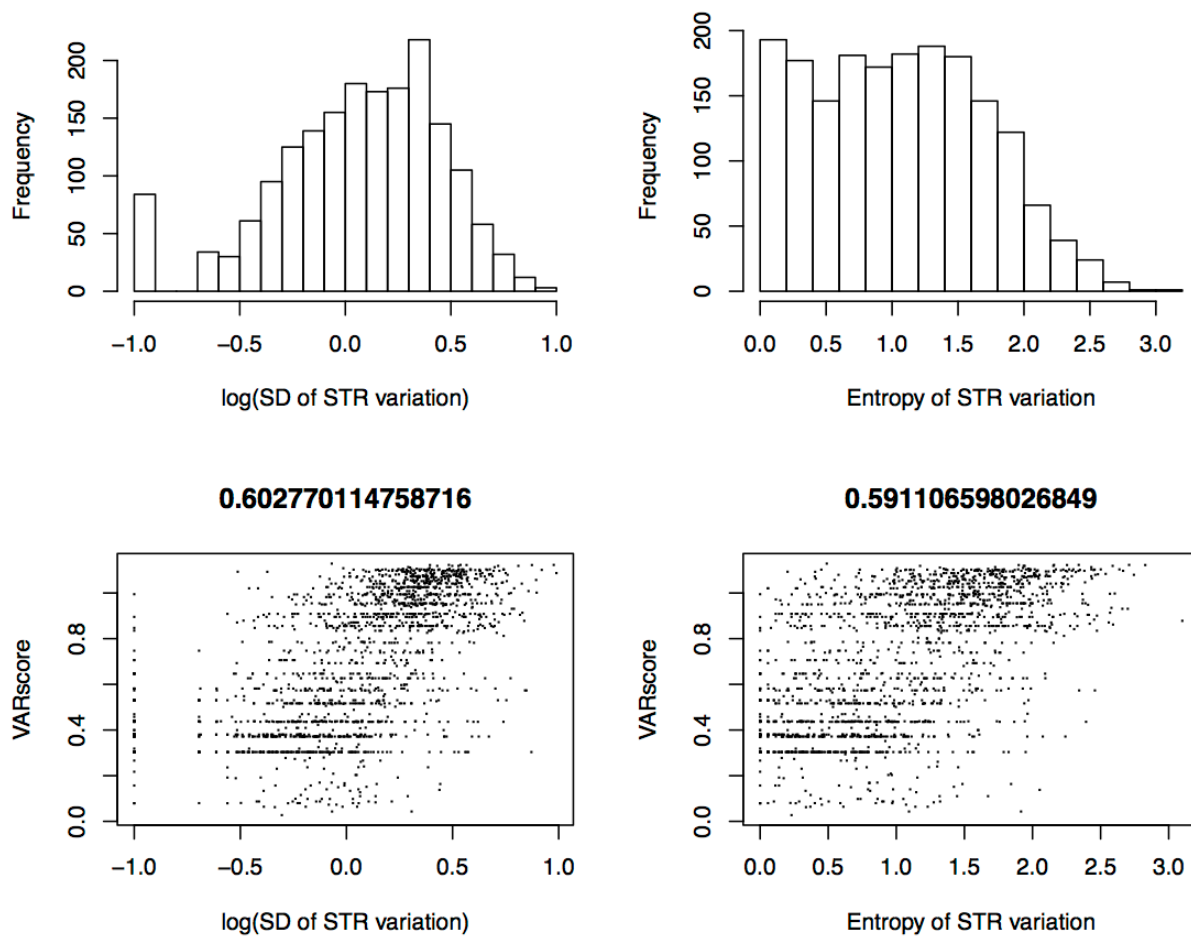

**Supplemental Fig. S8. Different summaries of STR allelic variation are correlated with existing reference-sequence-based predictors of STR variability.** Bottom panels: value above plot is the Pearson correlation between the two variables.



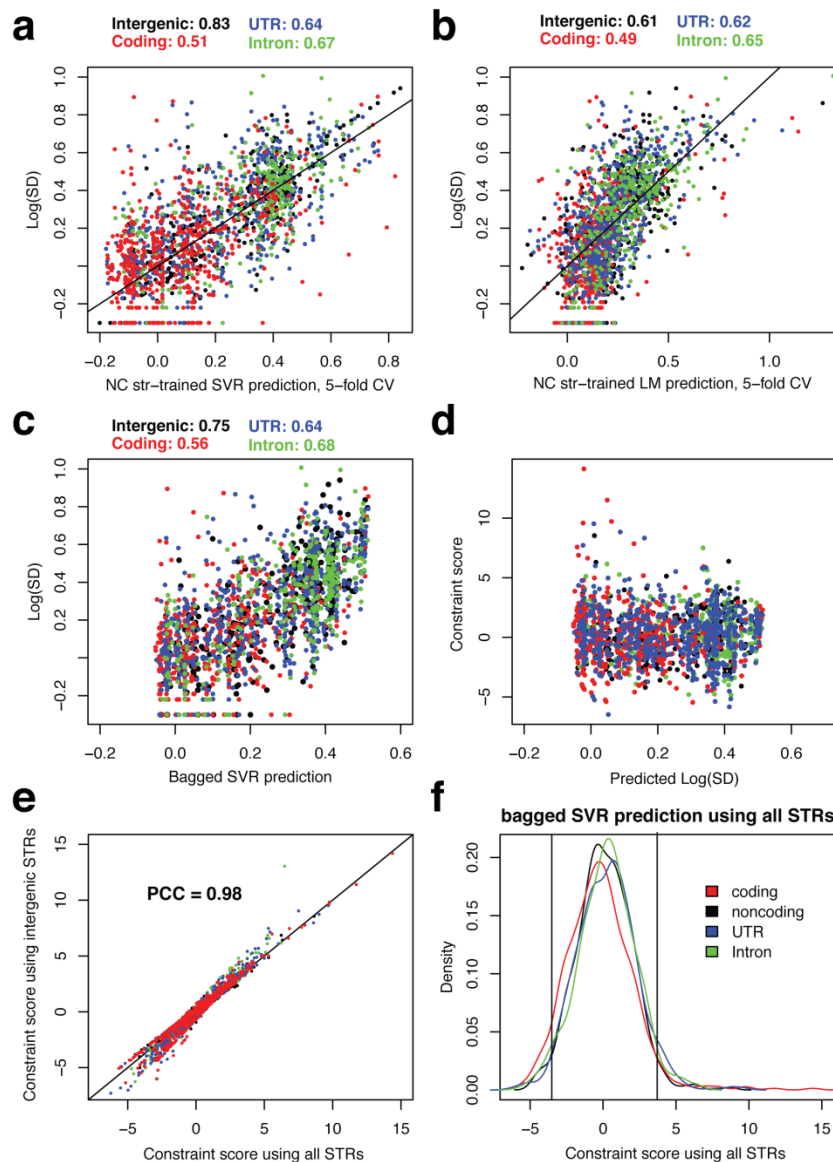

**Supplemental Fig. S9. Performance of various models in predicting STR variation across 96 *A. thaliana* strains.** (A): performance of support vector regression (SVR) when fit to all STRs with 5-fold cross-validation, stratified by genomic location. (B): performance of simple linear regression prediction when fit to all STRs with 5-fold cross-validation. (C): performance of bootstrap aggregation of SVR models (“bagging”) fit to intergenic STRs only. (D): Little evidence for bias of bagged SVR predictions across the range of the predictor. In all panels, black points are intergenic STRs, red points are coding STRs, blue points are UTR STRs, and green points are intronic STRs. Values above each plot represent the Pearson correlation coefficient between the prediction and the true value in different STR classes. (E): Comparison of constraint scores derived from bagged SVR models trained on only intergenic STRs (Y axis) or all STRs (X axis). PCC: Pearson correlation coefficient. (F): Distribution of constraint scores across STR categories (indicated by color), using a constraint score derived from bagged SVR models trained on all STRs.

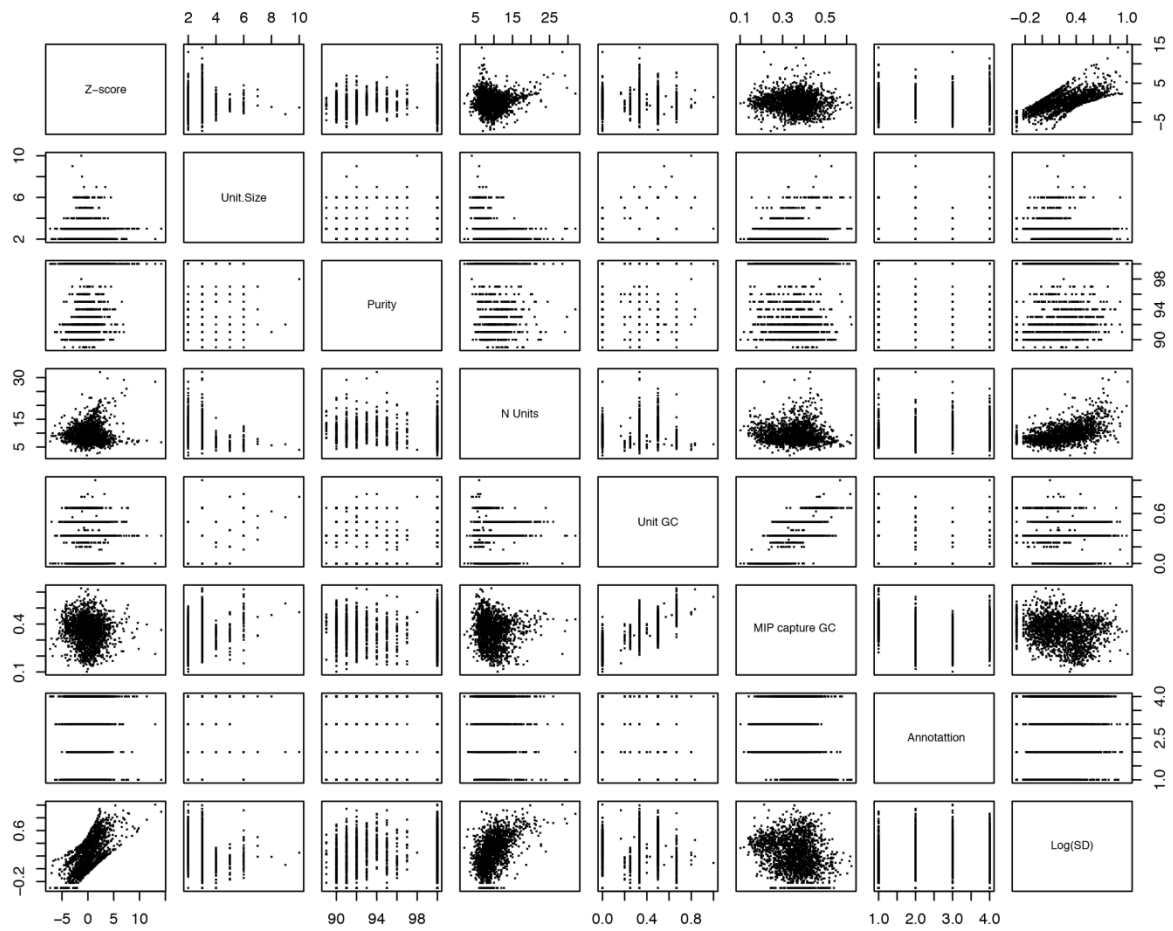

**Supplemental Fig. S10. Relationships between SVR model features, response variable (Log(SD)), conservation score (Z-score), and STR annotations.** Each feature of the final bagged SVR model is plotted against each other feature across all STRs, the response variable (Log(SD)), STR annotation, and the final conservation score prediction.

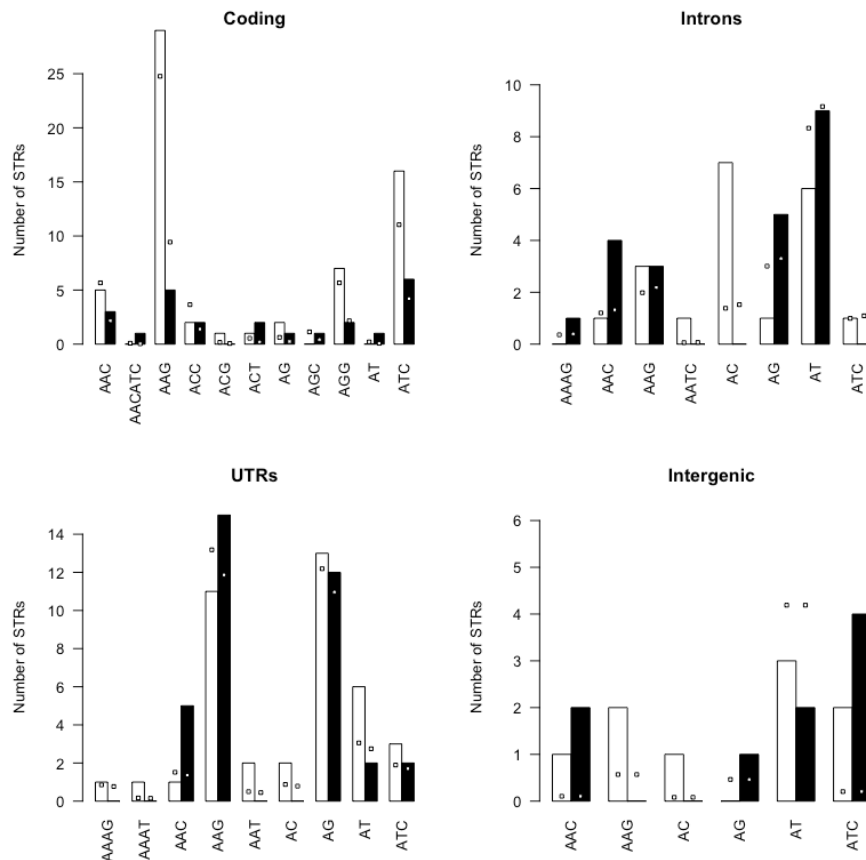

**Supplemental Fig. S11. Number of STRs showing non-neutral variation, stratified by locus category and unit motif.** White box-shaped points indicate the expected numbers for each bar, based on number of STRs in each locus category and number of STRs under different types of non-neutral behavior (conserved: white, hypervariable: black). STR motifs are collapsed into equivalent motif categories by reverse complementation and motif frame shifting (e.g. CTG = GCT = AGC).

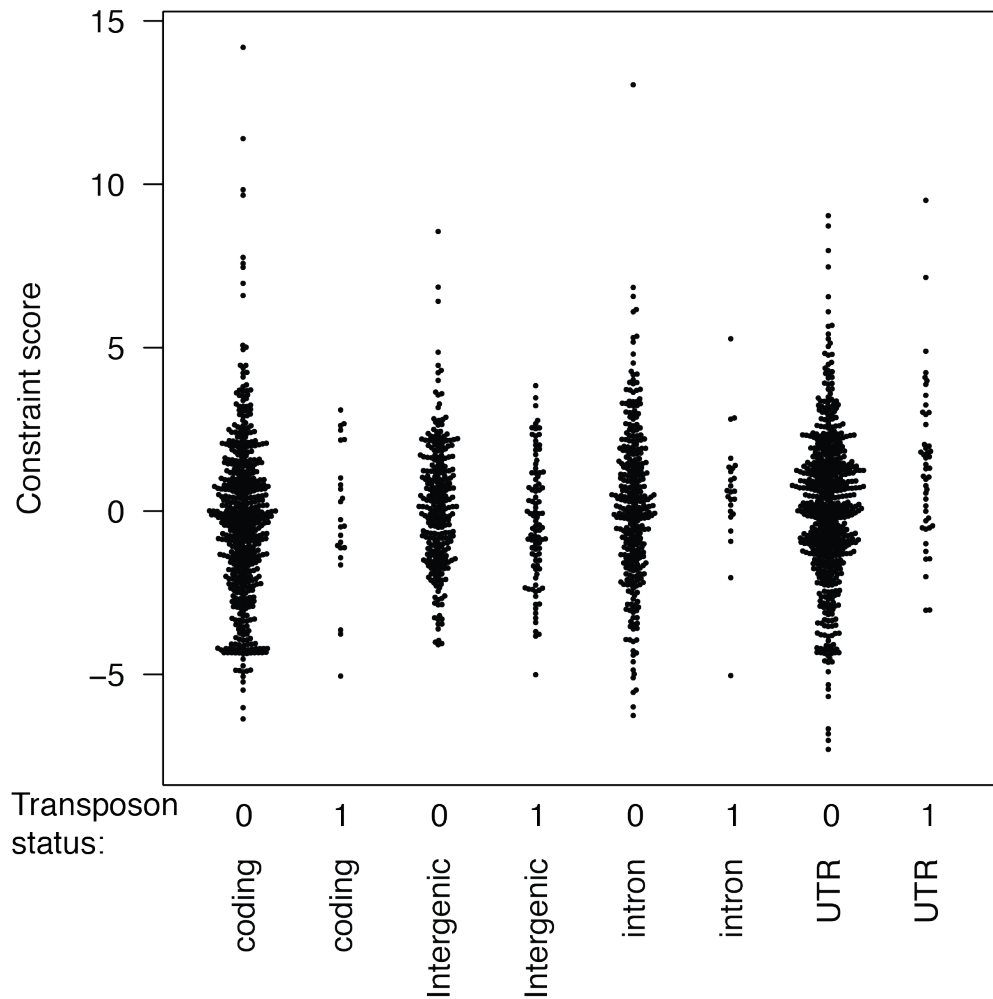

**Supplemental Figure S12. Little effect of transposable element annotation on STR conservation.** TE: Transposable element, Not TE: not a transposable element. Note that high overlap (>200bp) with TEs leads to classification as intergenic (e.g. noncoding).

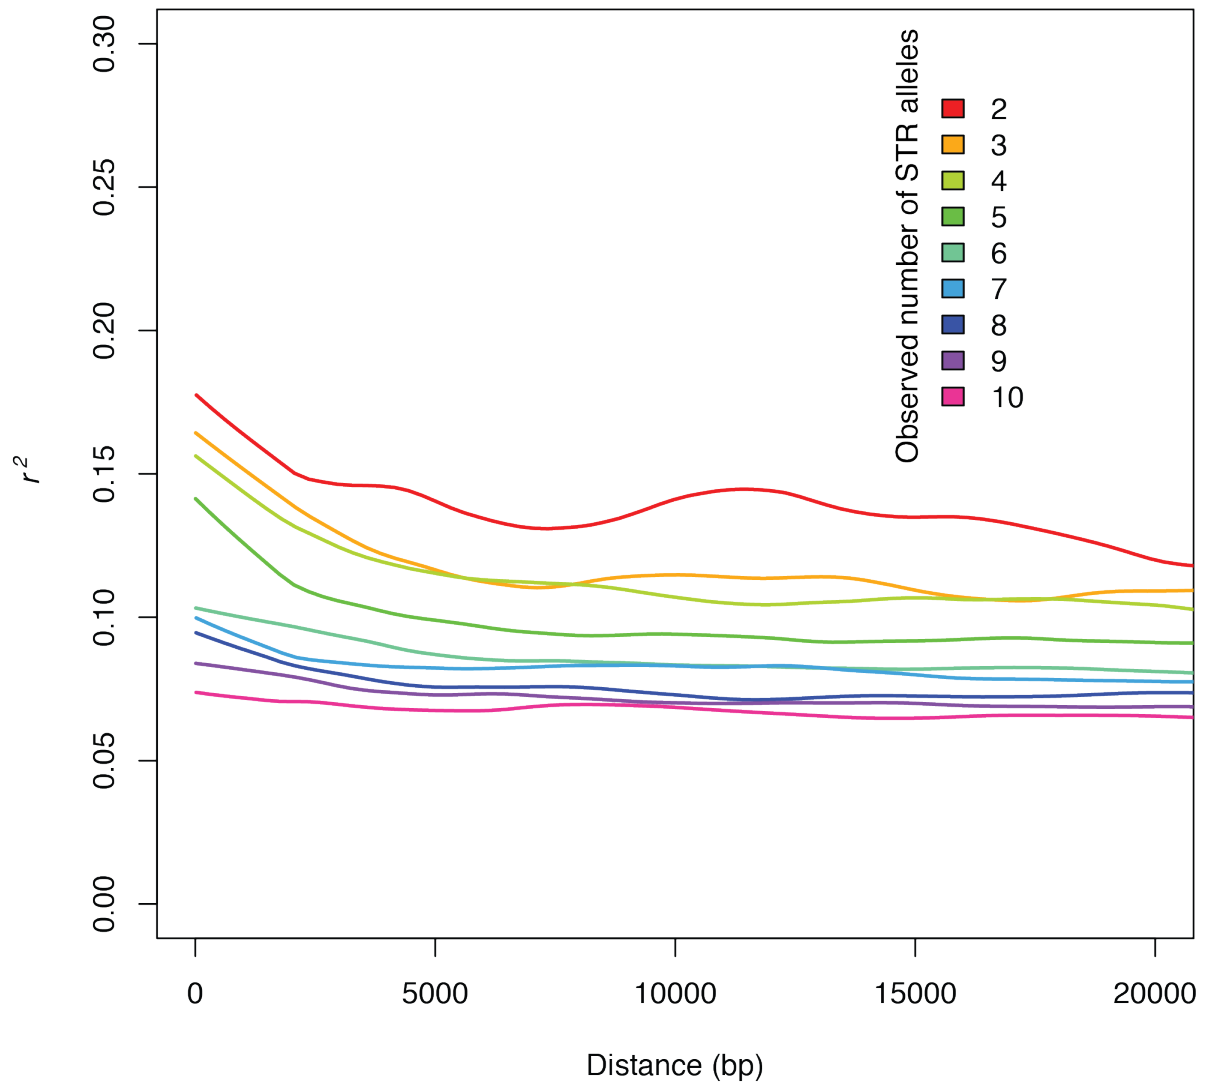

**Supplemental Fig. S13. Linkage disequilibrium is dependent on the number of alleles at an STR locus.** Lines of different colors represent lowess estimates of the relationship between distance between LD (measured by  $r^2$ ) and genomic distance for STR/SNP locus pairs of a certain STR allele count. For visualization purposes,  $r^2$  values lower than 0.05 were omitted from lowess estimation. Note that scales are different from Fig. 6c.

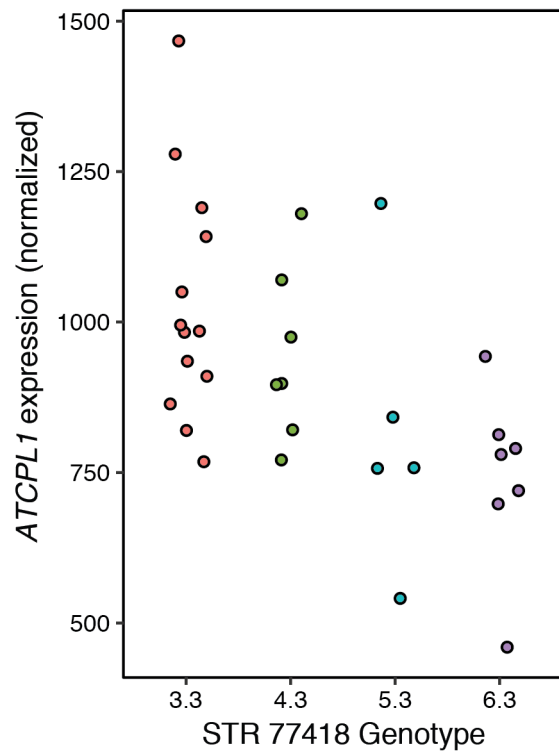

**Supplemental Fig. S14. A strong STR-mediated eQTL.** For a full list of associations, see Supplemental Table S4.

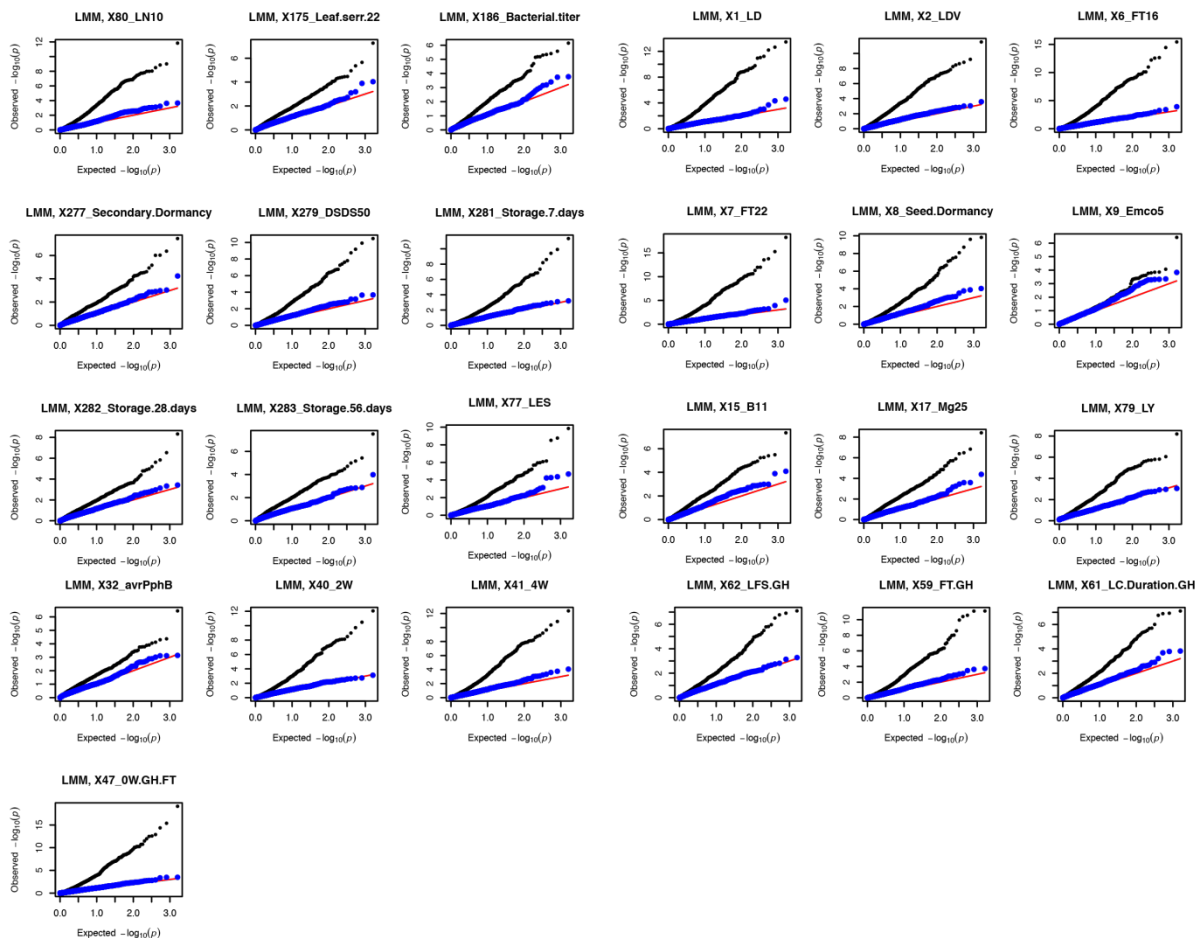

**Supplemental Fig. S15.** Q-Q plots of p-values for association tests between STR genotype and phenotypes showing associations at  $p < 10^{-6}$  or  $p < 10^{-10}$  (flowering traits), while correcting for population structure in a linear mixed model. Black points indicate results from true genotypes, blue points are identical but with genotypes permuted (negative control tests). Red line indicates expected p-value distribution under the null hypothesis.

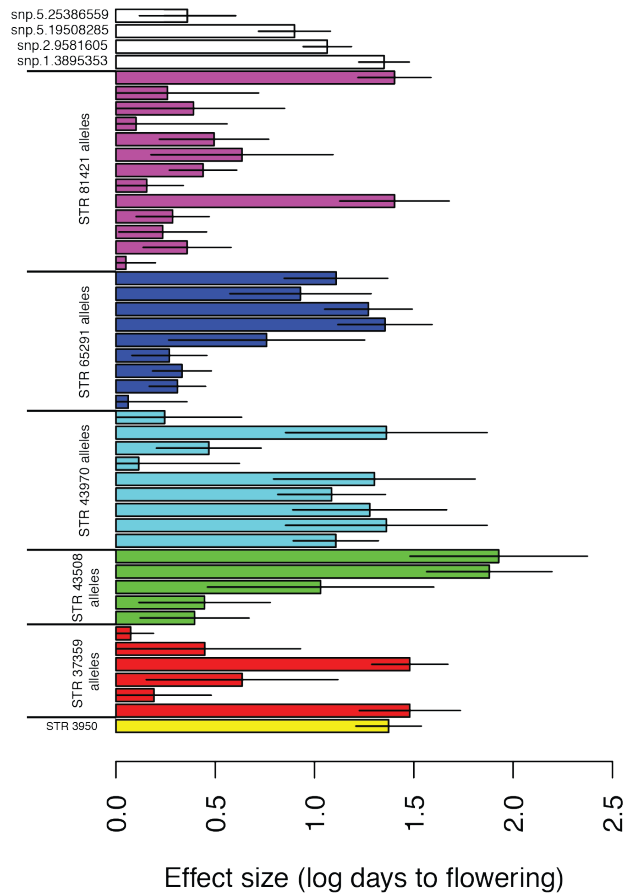

**Supplemental Fig. S16. Relative effect sizes for the phenotype days to flowering in long days for associated STR and SNP loci.** Fixed effects from a linear mixed model also fitting kinship among strains as a random effect. For a variance decomposition of this phenotype with respect to these loci, see Supplemental Table S8.



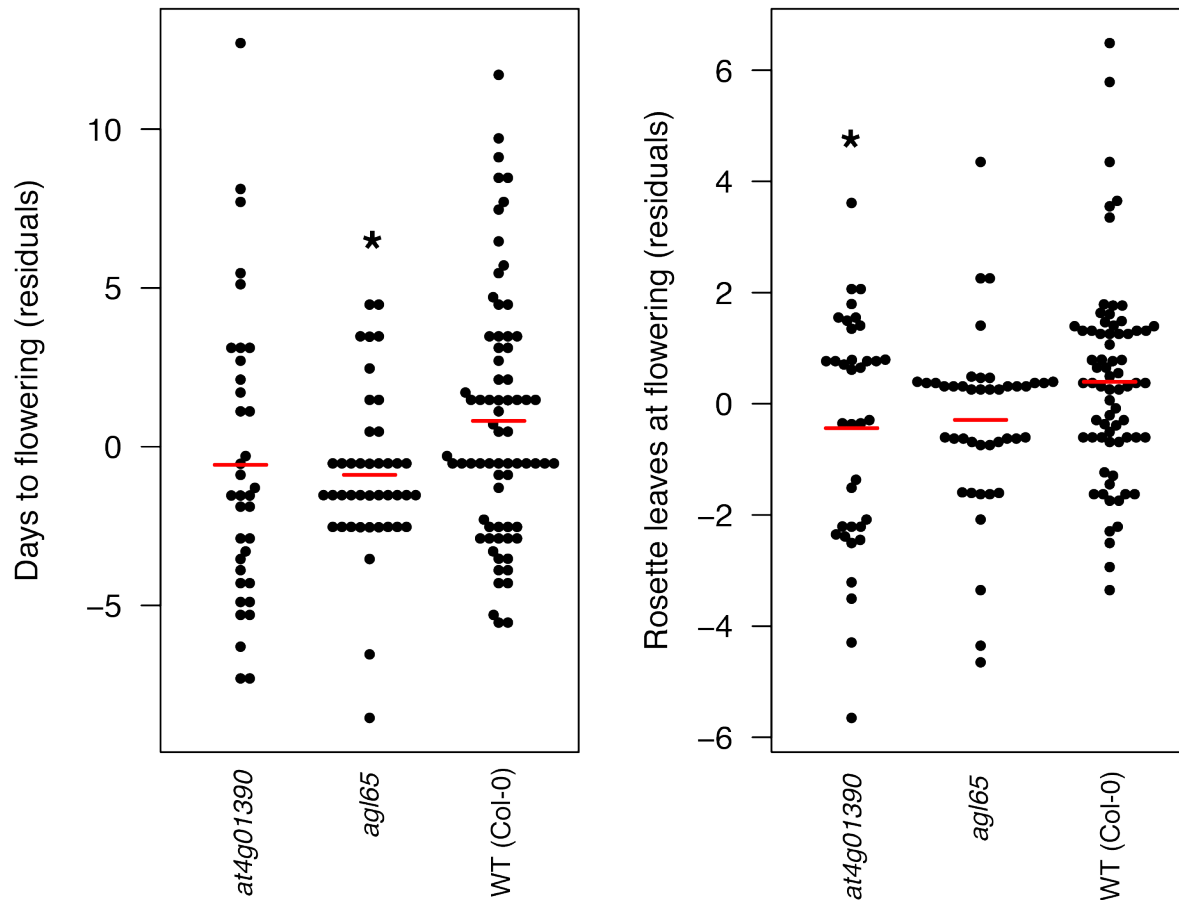**Supplemental Fig. S17. Validation of flowering time associations using insertion mutants.**

Residuals are estimated from a linear mixed model fitting experiment and growth tray position as random effects. Red horizontal bars indicate mean of residuals within each genotype. \*:  $p < 0.05$  of fixed effect for genotype on phenotype. Mutants are insertional T-DNA mutants in the Col-0 background.

### Supplemental Tables

**Supplemental Table S1.** Performance of various BWA parameter sets on Col-0 (algorithm, open, extend, mismatch, alignment score threshold) by various metrics (proportion STRs typed, proportion STRs correct, correlation with correct alleles, overall accuracy).  
*Included in Supplemental XLSX file.*

**Supplemental Table S2.** STRs showing modest expansions (expansion score  $\geq 2$ ) in at least one strain.

| ID     | Number of units | Purity | Motif  | Locus size | annotation | chr  | start    | stop     | gene       | Expansion Score |
|--------|-----------------|--------|--------|------------|------------|------|----------|----------|------------|-----------------|
| 65400  | 6.7             | 100    | CAA    | 20.1       | intron     | Chr4 | 672378   | 672397   | AT4G01540  | 5.92592593      |
| 47883  | 10              | 100    | AT     | 20         | UTR        | Chr3 | 5587549  | 5587568  | AT3G16440  | 4.5             |
| 89068  | 10              | 100    | TA     | 20         | Intergenic | Chr5 | 9760426  | 9760445  | AT5TE35475 | 4.33333333      |
| 2539   | 6.7             | 100    | AGA    | 20.1       | coding     | Chr1 | 4261712  | 4261731  | AT1G12490  | 3.73134328      |
| 5427   | 8.5             | 90     | TATA   | 34         | intron     | Chr1 | 8541165  | 8541198  | AT1G24145  | 3.6             |
| 19084  | 7.3             | 100    | CTT    | 21.9       | UTR        | Chr1 | 21181668 | 21181689 | AT1G56540  | 3.42465753      |
| 15746  | 7.3             | 100    | AGA    | 21.9       | coding     | Chr1 | 17436847 | 17436868 | AT1G47510  | 3.15068493      |
| 25619  | 9               | 91     | TCT    | 27         | UTR        | Chr1 | 30082339 | 30082365 | AT1G79970  | 3               |
| 7358   | 8.7             | 91     | TTC    | 26.1       | intron     | Chr1 | 11087597 | 11087622 | AT1G31070  | 2.98850575      |
| 414    | 13              | 94     | GAA    | 39         | UTR        | Chr1 | 641971   | 642008   | AT1G08815  | 2.77777778      |
| 95706  | 7               | 100    | TCA    | 21         | UTR        | Chr5 | 15004737 | 15004757 | AT5G37780  | 2.75            |
| 41915  | 11              | 100    | AT     | 22         | intron     | Chr2 | 15267011 | 15267032 | AT2G36390  | 2.7             |
| 84110  | 6.7             | 100    | AGG    | 20.1       | UTR        | Chr5 | 3433738  | 3433757  | AT5G10880  | 2.68656716      |
| 45985  | 10              | 100    | TC     | 20         | Intergenic | Chr3 | 2321443  | 2321462  | NA         | 2.66666667      |
| 77933  | 8               | 100    | TGA    | 24         | UTR        | Chr4 | 12336368 | 12336391 | AT4G23680  | 2.625           |
| 32842  | 11.3            | 100    | GAA    | 33.9       | Intergenic | Chr2 | 5490658  | 5490691  | NA         | 2.56637168      |
| 7150   | 12.5            | 100    | AG     | 25         | intron     | Chr1 | 10817051 | 10817075 | AT1G30540  | 2.51851852      |
| 100082 | 6.7             | 94     | CTCCGG | 40.2       | coding     | Chr5 | 19584200 | 19584239 | AT5G48320  | 2.45614035      |
| 35201  | 8               | 100    | ACC    | 24         | coding     | Chr2 | 7039826  | 7039849  | AT2G16250  | 2.375           |
| 5792   | 14.5            | 92     | AG     | 29         | intron     | Chr1 | 9023890  | 9023918  | AT1G26100  | 2.35294118      |
| 33137  | 8.7             | 91     | TCT    | 26.1       | coding     | Chr2 | 5736639  | 5736664  | AT2G13770  | 2.29885058      |
| 97752  | 8.3             | 95     | CAC    | 24.9       | coding     | Chr5 | 16915919 | 16915944 | AT5G42310  | 2.28915663      |
| 74375  | 6               | 100    | CAAGAA | 36         | UTR        | Chr4 | 7654240  | 7654275  | AT4G13160  | 2.2             |
| 103981 | 8.3             | 100    | ATG    | 24.9       | Intergenic | Chr5 | 25146813 | 25146837 | NA         | 2.1686747       |
| 81607  | 7               | 100    | AGA    | 21         | UTR        | Chr4 | 18243655 | 18243675 | AT4G39170  | 2.16666667      |
| 43048  | 12.3            | 94     | TTC    | 36.9       | UTR        | Chr2 | 16925770 | 16925806 | AT2G40520  | 2.15053763      |
| 96928  | 9               | 91     | CAT    | 27         | Intergenic | Chr5 | 16009433 | 16009459 | NA         | 2.11111111      |
| 47029  | 18              | 94     | CT     | 36         | UTR        | Chr3 | 4136084  | 4136119  | AT3G12955  | 2               |

**Supplemental Table S3.** Frequency of coding STR amino acid composition compared to *A. thaliana* proteome (Karlin et al. 2002).

| Amino Acid | Proteome frequency <sup>1</sup> | count | Purifying frequency <sup>1</sup> | Standard error | Fold enrichment |
|------------|---------------------------------|-------|----------------------------------|----------------|-----------------|
| A          | 0.063                           | 0     | 0                                | 0              | 0               |
| C          | 0.001                           | 0     | 0                                | 0              | 0               |
| D          | 0.084                           | 9     | 0.142857143                      | 0.044086671    | 1.700680272     |
| E          | 0.158                           | 18    | 0.285714286                      | 0.056915648    | 1.808318264     |
| F          | 0.012                           | 1     | 0.015873016                      | 0.015746536    | 1.322751323     |
| G          | 0.11                            | 5     | 0.079365079                      | 0.034055572    | 0.721500722     |
| H          | 0.027                           | 2     | 0.031746032                      | 0.022088646    | 1.175778954     |
| I          | 0.001                           | 1     | 0.015873016                      | 0.015746536    | 15.87301587     |
| K          | 0.072                           | 7     | 0.111111111                      | 0.039594258    | 1.543209877     |
| L          | 0.052                           | 1     | 0.015873016                      | 0.015746536    | 0.305250305     |
| M          | 0.004                           | 1     | 0.015873016                      | 0.015746536    | 3.968253968     |
| N          | 0.05                            | 4     | 0.063492063                      | 0.030721695    | 1.26984127      |
| P          | 0.104                           | 1     | 0.015873016                      | 0.015746536    | 0.152625153     |
| Q          | 0.058                           | 1     | 0.015873016                      | 0.015746536    | 0.273672687     |
| R          | 0.021                           | 0     | 0                                | 0              | NA              |
| S          | 0.334                           | 8     | 0.126984127                      | 0.041948411    | 0.380191997     |
| T          | 0.035                           | 1     | 0.015873016                      | 0.015746536    | 0.453514739     |
| V          | 0.011                           | 1     | 0.015873016                      | 0.015746536    | 1.443001443     |
| W          | 0                               | 0     | 0                                | 0              | NA              |
| Y          | 0                               | 0     | 0                                | 0              | NA              |

<sup>1</sup>: Proportion of proteins with an amino acid run with at least one of the indicated type (does not sum to 1).

**Supplemental Table S4.** STR-expression associations in *cis* (FDR < 0.5 for 1MB STRs, 0.1 for others).

| STR                                        | gene      | beta         | t-stat       | p-value  | FDR         |
|--------------------------------------------|-----------|--------------|--------------|----------|-------------|
| <i>STRs within 1MB of affected genes</i>   |           |              |              |          |             |
| 77418                                      | AT4G21670 | -0.726600648 | -6.505786818 | 2.43E-06 | 0.202737303 |
| 80659                                      | AT4G33120 | 0.862123883  | 6.291530503  | 3.84E-06 | 0.202737303 |
| 100562                                     | AT5G48090 | -1.378327481 | -5.956905693 | 7.96E-06 | 0.251368899 |
| 77418                                      | AT4G21860 | 0.772661033  | 5.78392224   | 1.17E-05 | 0.251368899 |
| 83137                                      | AT5G06660 | -0.904906529 | -5.75807398  | 1.24E-05 | 0.251368899 |
| 99144                                      | AT5G44565 | -1.766134236 | -5.672178594 | 1.50E-05 | 0.251368899 |
| 99144                                      | AT5G47770 | 2.021168016  | 5.624181318  | 1.67E-05 | 0.251368899 |
| 85241                                      | AT5G18860 | 0.898198603  | 5.545078054  | 1.99E-05 | 0.262642511 |
| 43830                                      | AT2G43950 | -1.909967903 | -5.226353678 | 4.09E-05 | 0.450427951 |
| 1840                                       | AT1G11350 | -1.60739376  | -5.140770441 | 4.98E-05 | 0.450427951 |
| 82895                                      | AT5G03770 | -2.568724952 | -5.130318095 | 5.10E-05 | 0.450427951 |
| 21447                                      | AT1G62640 | -0.608653253 | -5.09972821  | 5.47E-05 | 0.450427951 |
| 104448                                     | AT5G62540 | -0.989527092 | -5.093510359 | 5.55E-05 | 0.450427951 |
| 39206                                      | AT2G28130 | -2.029925926 | -5.050530478 | 6.12E-05 | 0.461566352 |
| 46518                                      | AT3G10640 | 0.914437602  | 5.004009256  | 6.81E-05 | 0.479364022 |
| 84539                                      | AT5G10946 | 1.513238091  | 4.973511699  | 7.30E-05 | 0.482050245 |
| <i>STRs within 100KB of affected genes</i> |           |              |              |          |             |
| STR_77418                                  | AT4G21670 | -0.730803    | -6.827481    | 9.47E-07 | 0.06755988  |
| <i>STRs within 10KB of affected genes</i>  |           |              |              |          |             |
| STR_21123                                  | AT1G63880 | 1.2084067    | 6.161354     | 4.11E-06 | 0.03389828  |
| STR_83137                                  | AT5G06660 | -0.9154243   | -5.694793    | 1.19E-05 | 0.04893082  |
| STR_8109                                   | AT1G32583 | -0.8341916   | -5.286204    | 3.06E-05 | 0.08414067  |

|                                          |           |            |           |          |            |
|------------------------------------------|-----------|------------|-----------|----------|------------|
| STR_43830                                | AT2G43950 | -1.883862  | -5.147784 | 4.23E-05 | 0.08729684 |
| <i>STRs within 1KB of affected genes</i> |           |            |           |          |            |
| STR_83137                                | AT5G06660 | -0.9154243 | -5.694793 | 1.19E-05 | 0.02214102 |
| STR_41951                                | AT2G36550 | -0.5829935 | -4.765462 | 1.04E-04 | 0.06673268 |
| STR_73034                                | AT4G10310 | -0.9215156 | -4.589755 | 1.59E-04 | 0.06673268 |
| STR_44826                                | AT3G01790 | 0.3455633  | 4.548121  | 1.75E-04 | 0.06673268 |
| STR_1354                                 | AT1G07025 | -0.2752847 | -4.440702 | 2.27E-04 | 0.06673268 |
| STR_77555                                | AT4G22280 | 2.1427839  | 4.428316  | 2.33E-04 | 0.06673268 |
| STR_44903                                | AT3G02390 | 1.3386234  | 4.368212  | 2.69E-04 | 0.06673268 |
| STR_79636                                | AT4G30910 | 0.2047619  | 4.343241  | 2.86E-04 | 0.06673268 |
| STR_83557                                | AT5G08020 | -1.4256175 | -4.280532 | 3.32E-04 | 0.06891407 |
| STR_44048                                | AT2G45170 | -0.4441011 | -4.1577   | 4.46E-04 | 0.07590795 |
| STR_63630                                | AT3G58020 | 1.0055077  | 4.156214  | 4.47E-04 | 0.07590795 |

**Supplemental Table S5.** STR-phenotype associations and with relevant information.  
*Included in Supplemental XLSX file.*

**Supplemental Table S6.** STR-phenotype associations are robust to adjustment for SNPs.  
*Included in Supplemental XLSX file.*

**Supplemental Table S7.** Analysis of variance in the phenotype of days to flowering (long days) with respect to associated SNP and STR loci. Sums of squares represent marginal contributions (“type II”).

| Locus            | Sum of Squares | DF | F-value | p-value |
|------------------|----------------|----|---------|---------|
| snp.1.3895353    | 1153.6         | 1  | 2.353   | 0.1316  |
| snp.2.9581605    | 508.0          | 1  | 1.0362  | 0.3138  |
| snp.5.19508285   | 191.7          | 1  | 0.391   | 0.5347  |
| snp.5.25386559   | 39.5           | 1  | 0.0805  | 0.7778  |
| STR 37359        | 1149.9         | 6  | 0.3909  | 0.8813  |
| STR 3950         | 15.4           | 1  | 0.0314  | 0.8602  |
| STR 43058        | 1338.2         | 5  | 0.5459  | 0.7406  |
| STR 43970        | 3336.3         | 7  | 0.9721  | 0.4622  |
| STR 65291        | 6233.0         | 8  | 1.5892  | 0.1531  |
| STR 81421        | 4313.7         | 12 | 0.7332  | 0.7123  |
| <i>Residuals</i> | 23532.8        | 48 | -       | -       |

**Supplemental Table S8.** Sequencing libraries used in this study.  
*Included in Supplemental XLSX file.*

**Supplemental Table S9.** Details of sequencing runs used in this study.

| Sequencing run  | instrument, kit                       | demultiplexed reads | libraries | notes                                                       |
|-----------------|---------------------------------------|---------------------|-----------|-------------------------------------------------------------|
| Pilot           | MiSeq v2, 300 cycle                   | 15008516            | 5         |                                                             |
| Full experiment | NextSeq 500 v2, 300 cycle High Output | 137132721           | 96        | flow cell malfunction, lost ~60% of reads in demultiplexing |

**Supplemental Table S10.** Primers used in this study.  
*Included in Supplemental XLSX file.*

**Supplemental Table S11.** *A. thaliana* mutants used in this study.

| <b>ID</b>   | <b>gene</b>      | <b>alias</b>      | <b>note</b>                         | <b>reference</b>                                 |
|-------------|------------------|-------------------|-------------------------------------|--------------------------------------------------|
| SALK_113736 | <i>AT4G01390</i> | <i>at4g101390</i> | homozygote isolated from segregants | this study                                       |
| CS66521     | <i>AGL65</i>     | <i>agl65-1</i>    | from SALK_009651                    | Adamczyk and Fernandez (2009) <i>Plant Phys.</i> |

**Supplemental References**

- Alonso-Blanco C, Andrade J, Becker C, Bemm F, Bergelson J, Borgwardt KM, Cao J, Chae E, Dezwaan TM, Ding W, et al. 2016. 1,135 Genomes Reveal the Global Pattern of Polymorphism in *Arabidopsis thaliana*. *Cell* **0**.  
<http://www.cell.com/article/S0092867416306675/abstract> (Accessed June 27, 2016).
- Atwell S, Huang YS, Vilhjálmsson BJ, Willems G, Horton M, Li Y, Meng D, Platt A, Tarone AM, Hu TT, et al. 2010. Genome-wide association study of 107 phenotypes in *Arabidopsis thaliana* inbred lines. *Nature* **465**: 627–31.
- Boyle EA, O’Roak BJ, Martin BK, Kumar A, Shendure J. 2014. MIPgen: optimized modeling and design of molecular inversion probes for targeted resequencing. *Bioinformatics* **30**: 2670–2672.
- Cao J, Schneeberger K, Ossowski S, Günther T, Bender S, Fitz J, Koenig D, Lanz C, Stegle O, Lippert C, et al. 2011. Whole-genome sequencing of multiple *Arabidopsis thaliana* populations. *Nature genetics* **43**: 956–63.
- Carlson KD, Sudmant PH, Press MO, Eichler EE, Shendure J, Queitsch C. 2015. MIPSTR: A method for multiplex genotyping of germline and somatic STR variation across many individuals. *Genome Research* **125**: 750–761.
- Chaisson MJP, Huddleston J, Dennis MY, Sudmant PH, Malig M, Hormozdiari F, Antonacci F, Surti U, Sandstrom R, Boitano M, et al. 2015. Resolving the complexity of the human genome using single-molecule sequencing. *Nature* **517**: 608–611.
- Cheng C-Y, Krishnakumar V, Chan AP, Thibaud-Nissen F, Schobel S, Town CD. 2017. Araport11: a complete reannotation of the *Arabidopsis thaliana* reference genome. *Plant J* **89**: 789–804.
- Gan X, Stegle O, Behr J, Steffen JG, Drewe P, Hildebrand KL, Lyngsoe R, Schultheiss SJ, Osborne EJ, Sreedharan VT, et al. 2011. Multiple reference genomes and transcriptomes for *Arabidopsis thaliana*. *Nature* **477**: 419–23.
- Gymrek M, Willems T, Guilmatre A, Zeng H, Markus B, Georgiev S, Daly MJ, Price AL, Pritchard JK, Sharp AJ, et al. 2015. Abundant contribution of short tandem repeats to gene expression variation in humans. *Nature Genetics* **48**: 22–29.
- Hiatt JB, Pritchard CC, Salipante SJ, O’Roak BJ, Shendure J. 2013. Single molecule molecular inversion probes for targeted, high-accuracy detection of low-frequency variation. *Genome research* **23**: 843–54.
- Huntley MA, Clark AG. 2007. Evolutionary Analysis of Amino Acid Repeats across the Genomes of 12 *Drosophila* Species. *Mol Biol Evol* **24**: 2598–2609.

- Karlin S, Brocchieri L, Bergman A, Mrazek J, Gentles AJ. 2002. Amino acid runs in eukaryotic proteomes and disease associations. *Proceedings of the National Academy of Sciences of the United States of America* **99**: 333–8.
- Mackay TFC, Richards S, Stone EA, Barbadilla A, Ayroles JF, Zhu D, Casillas S, Han Y, Magwire MM, Cridland JM, et al. 2012. The *Drosophila melanogaster* Genetic Reference Panel. *Nature* **482**: 173–8.
- Meyer PE. 2014. *infotheo: Information-Theoretic Measures*. <https://cran.r-project.org/web/packages/infotheo/index.html> (Accessed January 11, 2017).
- Press MO, Carlson KD, Queitsch C. 2014. The overdue promise of short tandem repeat variation for heritability. *Trends in Genetics* **30**: 504–512.
- Quinlan AR, Hall IM. 2010. BEDTools: a flexible suite of utilities for comparing genomic features. *Bioinformatics* **26**: 841–842.
- Sullivan AM, Arsovski AA, Lempe J, Bubb KL, Weirauch MT, Sabo PJ, Sandstrom R, Thurman RE, Neph S, Reynolds AP, et al. 2014. Mapping and Dynamics of Regulatory DNA and Transcription Factor Networks in *A. thaliana*. *Cell Reports* **8**: 2015–30.
