# Supplementary material for: Massive variation of short tandem repeats with functional consequences across strains of Arabidopsis thaliana
Source: HighWire-hosted journal article supplement (doi:10.1101/gr.231753.117), 2018-07-03
Supplement: Supplemental_File_S1.xlsx [file Supplemental_File_S1.xlsx]

## Sheet: Coding_purifying_strs
ID	Z-score	Unit.Size	Purity	N_units	Unit_GC	scan_gc	annotation[names(allzs),	Log(SD)	Unit.Size	X..of.Units	Purity	TRF.score	VARscore	Consensus	Size.of.Locus	annotation	chr	start	stop	transposon	gene	all_annotation	DHS	gene	name	description
67478	-7.29255	3	100	7	0	0.244444	UTR	-0.30103	3	7	100	42	0.37134	ATT	21	UTR	Chr4	2457587	2457607	0	AT4G04850	gene,mRNA,exon,three_prime_UTR,mRNA,exon,three_prime_UTR	0	AT4G04850	KEA3	K(+) efflux antiporter 3, chloroplastic [Source:UniProtKB/Swiss-Prot;Acc:Q9M0Z3]
25820	-7.01712	2	100	9	0.5	0.308824	UTR	-0.0666566	2	10	100	40	0.855577	GT	20	UTR	Chr1	30412221	30412240	0	AT1G80940	gene,mRNA,mRNA,exon,three_prime_UTR,gene,mRNA,three_prime_UTR,exon	0	AT1G80940	N/A	N/A
97704	-6.81726	2	100	10	0	0.2	UTR	0.0491669	2	10	100	40	0.855577	AT	20	UTR	Chr5	16881174	16881193	0	AT5G42230	gene,mRNA,mRNA	0	AT5G42230	SCPL41	Serine carboxypeptidase-like 41 [Source:UniProtKB/Swiss-Prot;Acc:Q9FH06]
24669	-6.6607	2	100	9	0	0.274074	UTR	0.123432	2	10	100	40	0.855577	AT	20	UTR	Chr1	28708457	28708476	0	AT1G76510	gene,mRNA,three_prime_UTR,exon,mRNA,exon,three_prime_UTR	1	AT1G76510	ARID5	AT-rich interactive domain-containing protein 5 [Source:UniProtKB/Swiss-Prot;Acc:Q0WNR6]
47205	-5.67564	2	100	9.5	0	0.311111	UTR	0.149189	2	11.5	100	46	0.993576	AT	23	UTR	Chr3	4498043	4498065	0	AT3G13730	gene,mRNA,three_prime_UTR,exon,mRNA,three_prime_UTR,exon	1	AT3G13730	CYP90D1	3-epi-6-deoxocathasterone 23-monooxygenase [Source:UniProtKB/Swiss-Prot;Acc:Q94IA6]
79803	-5.44872	2	92	13.5	0.5	0.407407	UTR	-0.106068	2	13.5	92	47	1.02035	GA	27	UTR	Chr4	15324546	15324572	0	AT4G31620	gene,mRNA,exon,five_prime_UTR,mRNA,protein	0	AT4G31620	N/A	N/A
64896	-5.31496	2	100	9.5	0.5	0.377778	UTR	-0.00627757	2	10.5	100	42	0.908802	AG	21	UTR	Chr4	75334	75354	0	AT4G00180	gene,mRNA,exon,five_prime_UTR,mRNA,exon,five_prime_UTR	0	AT4G00180	YAB3	Axial regulator YABBY 3 [Source:UniProtKB/Swiss-Prot;Acc:Q9XFB1]
80226	-4.91489	3	100	7	0.333333	0.355556	UTR	-0.30103	3	7	100	42	0.37134	TCA	21	UTR	Chr4	16111144	16111164	0	AT4G33495	gene,mRNA,exon,three_prime_UTR	0	AT4G33495	RPD1	Protein ROOT PRIMORDIUM DEFECTIVE 1 [Source:UniProtKB/Swiss-Prot;Acc:Q689D6]
49057	-4.62594	2	100	9.5	0.5	0.313869	UTR	0.0558589	2	10.5	100	42	0.908802	GA	21	UTR	Chr3	7464983	7465003	0	AT3G21260	gene,mRNA,mRNA,mRNA,exon,five_prime_UTR,protein,protein	1	AT3G21260	GLTP3	Glycolipid transfer protein 3 [Source:UniProtKB/Swiss-Prot;Acc:Q9LU33]
79017	-4.61613	3	100	7	0.333333	0.42963	UTR	-0.30103	3	7	100	42	0.37134	AAG	21	UTR	Chr4	14199126	14199146	0	AT4G28730	gene,mRNA,five_prime_UTR,exon,mRNA,five_prime_UTR,exon	1	AT4G28730	GRXC5	Glutaredoxin-C5, chloroplastic [Source:UniProtKB/Swiss-Prot;Acc:Q8GWS0]
79999	-4.58362	2	100	10	0.5	0.474074	UTR	-0.0183119	2	10	100	40	0.855577	TC	20	UTR	Chr4	15676454	15676473	0	AT4G32480	gene,mRNA,five_prime_UTR,exon	1	AT4G32480	N/A	N/A
41464	-4.51764	3	92	8.3	0.333333	0.348148	UTR	-0.158158	3	9.3	92	46	0.646654	CAT	27.9	UTR	Chr2	14548117	14548146	0	AT2G34520	gene,mRNA	0	AT2G34520	N/A	N/A
76041	-4.4149	2	100	9.5	0.5	0.4	UTR	0.0582193	2	10.5	100	42	0.908802	TC	21	UTR	Chr4	9827535	9827555	0	AT4G17650	gene,mRNA,five_prime_UTR,exon	1	AT4G17650	N/A	N/A
44046	-4.36209	2	100	10.5	0.5	0.378571	UTR	-0.00366522	2	10.5	100	42	0.908802	AG	21	UTR	Chr2	18620092	18620112	0	AT2G45160	gene,mRNA,exon,five_prime_UTR	1	AT2G45160	SCL27	Scarecrow-like protein 27 [Source:UniProtKB/Swiss-Prot;Acc:Q7XJM8]
41903	-4.35446	3	90	8	0.333333	0.288889	UTR	-0.30103	3	8	90	41	0.379879	CAT	24	UTR	Chr2	15229065	15229088	0	AT2G36320	gene,mRNA,exon,five_prime_UTR	1	AT2G36320	SAP4	Zinc finger A20 and AN1 domain-containing stress-associated protein 4 [Source:UniProtKB/Swiss-Prot;Acc:Q9SJM6]
72202	-4.33355	3	90	8	0.333333	0.385185	UTR	-0.30103	3	8	90	41	0.379879	TTC	24	UTR	Chr4	5803884	5803907	0	AT4G09080	gene,mRNA,exon,five_prime_UTR	0	AT4G09080	TOC75-4	Protein TOC75-4, chloroplastic [Source:UniProtKB/Swiss-Prot;Acc:Q5IZC8]
99849	-4.33301	3	90	8	0.333333	0.427536	UTR	-0.30103	3	8	90	41	0.379879	TTC	24	UTR	Chr5	19317759	19317782	0	AT5G47690	gene,mRNA,exon,five_prime_UTR,mRNA,five_prime_UTR,exon,mRNA,mRNA,five_prime_UTR,exon	1	AT5G47690	N/A	N/A
103010	-4.33261	3	90	8	0.333333	0.408759	UTR	-0.30103	3	8	90	41	0.379879	TCT	24	UTR	Chr5	23733503	23733526	0	AT5G58760	gene,mRNA,CDS,exon,mRNA,exon,five_prime_UTR,protein	1	AT5G58760	DDB2	Protein DAMAGED DNA-BINDING 2 [Source:UniProtKB/Swiss-Prot;Acc:Q6NQ88]
25016	-4.3326	3	90	8	0.333333	0.410072	UTR	-0.30103	3	8	90	41	0.379879	AAG	24	UTR	Chr1	29187767	29187790	0	AT1G77660	gene,mRNA,exon,five_prime_UTR	1	AT1G77660	N/A	N/A
105092	-4.32434	2	100	9.5	0	0.188406	UTR	0.218303	2	10.5	100	42	0.908802	AT	21	UTR	Chr5	26905603	26905623	0	AT5G67420	gene,mRNA,exon,five_prime_UTR,mRNA,exon,five_prime_UTR	1	AT5G67420	LBD37	LOB domain-containing protein 37 [Source:UniProtKB/Swiss-Prot;Acc:Q9FN11]
103274	-4.24233	3	91	8.3	0.333333	0.42029	UTR	-0.220359	3	8.3	91	40	0.457624	TTC	24.9	UTR	Chr5	24140428	24140454	0	AT5G59950	gene,mRNA,mRNA,mRNA,mRNA,five_prime_UTR,exon,mRNA,protein,protein,protein,protein	0	AT5G59950	ALY1	THO complex subunit 4A [Source:UniProtKB/Swiss-Prot;Acc:Q8L773]
88181	-4.23856	2	100	9	0.5	0.444444	UTR	0.0982757	2	10	100	40	0.855577	GA	20	UTR	Chr5	9055187	9055206	0	AT5G25940	gene,mRNA,exon,five_prime_UTR	1	AT5G25940	N/A	N/A
23682	-4.23377	3	91	8.7	0.333333	0.408759	UTR	-0.30103	3	8.7	91	45	0.530293	TTG	26.1	UTR	Chr1	27128869	27128894	0	AT1G72100	gene,mRNA,exon,three_prime_UTR	0	AT1G72100	N/A	N/A
87131	-4.22638	3	91	8.7	0.333333	0.37037	UTR	-0.30103	3	8.7	91	45	0.530293	GAA	26.1	UTR	Chr5	7956731	7956756	0	AT5G23590	gene,mRNA,exon,five_prime_UTR,gene,mRNA,exon,three_prime_UTR	0	AT5G23590	N/A	N/A
46708	-4.20563	3	90	8.3	0.333333	0.42963	UTR	-0.30103	3	8.3	90	43	0.438104	CTT	24.9	UTR	Chr3	3578455	3578479	0	AT3G11400	gene,mRNA,five_prime_UTR,exon,mRNA,five_prime_UTR,exon	1	AT3G11400	N/A	N/A
3007	-4.18536	2	100	8.5	0.5	0.294964	UTR	0.119043	2	10.5	100	42	0.908802	AG	21	UTR	Chr1	4989584	4989604	0	AT1G14580	gene,mRNA,five_prime_UTR,exon,mRNA,exon,five_prime_UTR,mRNA,exon,five_prime_UTR	1	AT1G14580	IDD6	Protein indeterminate-domain 6, chloroplastic [Source:UniProtKB/Swiss-Prot;Acc:Q8RWX7]
6770	-4.13738	2	100	9.5	0.5	0.444444	UTR	0.0725309	2	10.5	100	42	0.908802	CT	21	UTR	Chr1	10283045	10283065	0	AT1G29370	gene,mRNA,exon,five_prime_UTR	0	AT1G29370	N/A	N/A
104057	-4.11879	4	95	6.2	0.25	0.340741	UTR	-0.220359	4	6.2	95	43	0.0798214	AGAA	24.8	UTR	Chr5	25254251	25254275	0	AT5G62920	gene,mRNA,exon,five_prime_UTR	1	AT5G62920	ARR6	Two-component response regulator ARR6 [Source:UniProtKB/Swiss-Prot;Acc:Q9ZWS6]
86473	-4.08445	2	100	10	0.5	0.407407	UTR	0.0358384	2	11	100	44	0.954678	GA	22	UTR	Chr5	7084706	7084727	0	AT5G20885	gene,mRNA,exon,five_prime_UTR	1	AT5G20885	N/A	N/A
79554	-3.9659	3	92	10	0.333333	0.311111	UTR	-0.30103	3	10	92	53	0.747237	GAA	30	UTR	Chr4	14917485	14917514	0	AT4G03275	gene,transcript_region,transcript_region,exon	0	AT4G03275	N/A	N/A
87679	-3.83367	2	100	10	0	0.288889	UTR	0.213033	2	10	100	40	0.855577	TA	20	UTR	Chr5	8600316	8600335	0	AT5G24960	three_prime_UTR,exon,gene,mRNA,mRNA,protein	0	AT5G24960	CYP71A14	Cytochrome P450 71A14 [Source:UniProtKB/Swiss-Prot;Acc:P58045]
2296	-3.80817	4	91	7	0	0.259259	UTR	-0.30103	4	7	91	42	0.217201	TAAA	28	UTR	Chr1	3878559	3878586	0	AT1G11545	gene,mRNA,three_prime_UTR,exon	0	AT1G11545	XTH8	Probable xyloglucan endotransglucosylase/hydrolase protein 8 [Source:UniProtKB/Swiss-Prot;Acc:Q8L9A9]
23762	-3.79557	2	100	9.5	0.5	0.407407	UTR	0.104207	2	11.5	100	46	0.993576	CT	23	UTR	Chr1	27256978	27257000	0	AT1G72410	gene,mRNA,mRNA,exon,five_prime_UTR	1	AT1G72410	N/A	N/A
98526	-3.78394	2	100	9	0	0.140741	UTR	0.259324	2	20	100	80	0.969646	TA	40	UTR	Chr5	17757516	17757555	0	AT5G44120	gene,mRNA,mRNA,mRNA,exon,five_prime_UTR,protein,protein	0	AT5G44120	CRA1	12S seed storage protein CRA1 [Source:UniProtKB/Swiss-Prot;Acc:P15455]
95672	-3.7446	3	92	8.7	0.333333	0.385185	UTR	-0.137167	3	8.7	92	47	0.548103	AAG	26.1	UTR	Chr5	14984444	14984470	0	AT5G37720	gene,mRNA,mRNA	0	AT5G37720	ALY4	THO complex subunit 4D [Source:UniProtKB/Swiss-Prot;Acc:Q6NQ72]
92543	-3.73594	2	91	12	0.5	0.385185	UTR	-0.0727155	2	13	91	45	0.982079	TG	26	UTR	Chr5	12599750	12599775	0	AT5G33355	exon,three_prime_UTR,gene,mRNA	0	AT5G33355	N/A	Defensin-like protein 207 [Source:UniProtKB/Swiss-Prot;Acc:Q3E8R5]
23169	-3.7316	2	92	13.5	0.5	0.338129	UTR	0.0400652	2	13.5	92	47	1.02035	AG	27	UTR	Chr1	26364650	26364676	0	AT1G70000	gene,mRNA,exon,five_prime_UTR,mRNA,exon,five_prime_UTR	1	AT1G70000	N/A	N/A
44606	-3.5312	3	96	10.3	0.333333	0.377778	UTR	-0.0136262	3	10.3	96	57	0.840458	AAG	30.9	UTR	Chr2	19562990	19563021	0	AT2G47750	exon,five_prime_UTR,gene,mRNA	0	AT2G47750	GH3.9	Putative indole-3-acetic acid-amido synthetase GH3.9 [Source:UniProtKB/Swiss-Prot;Acc:O82243]
104910	-3.51949	3	91	8.3	0.333333	0.325926	UTR	-0.161832	3	8.3	91	45	0.457624	AAG	24.9	UTR	Chr5	26608762	26608787	0	AT5G66658	gene,mRNA,exon,three_prime_UTR	0	AT5G66658	N/A	N/A
58128	-3.5061	3	100	7	0	0.177778	UTR	-0.114023	3	7	100	42	0.37134	AAT	21	UTR	Chr3	15222267	15222287	0	AT3G43270	gene,mRNA,three_prime_UTR,exon	0	AT3G43270	PME32	Probable pectinesterase/pectinesterase inhibitor 32 [Source:UniProtKB/Swiss-Prot;Acc:Q9LXK7]
83637	-3.49209	2	100	11	0.5	0.426471	UTR	0.0964267	2	11	100	44	0.954678	GA	22	UTR	Chr5	2666021	2666042	0	AT5G08290	gene,mRNA,five_prime_UTR,exon,mRNA,exon,five_prime_UTR	0	AT5G08290	YLS8	Thioredoxin-like protein YLS8 [Source:UniProtKB/Swiss-Prot;Acc:Q9FE62]

## Sheet: Coding_div_strs
Z_score	ID	Chromosome	TAIR10start	TAIR10end	Unit.Size	X..of.Units	Purity	VARscore	Consensus	GC_content	scan_gc	gene_model	gene	name	description	notes	seq	unit
14.189	2539	1	4261712	4261731	3	6.7	100	0.303382	AGA	0.333333	0.362963	AT1G12490.1	AT1G12490	N/A	F-box associated ubiquitination effector family protein [Source:TAIR;Acc:AT1G12490]	multiple strs	MESLPHEVVERILEKTCCGFSAEIHGCIETMEIIDRISILPTKTIDTASAIRSREDYFNPDLKHLTTLVLGSSSSVTIPTPWEKDKEKEKEKEKEDEEFFLVSFDSCDGLVCLYKYWKSGYVVNPTTRWYRPLPLSQLQQLLISLGRSVFELGYTVCDIGFGKDKITGTYKPVWLYNSLEIGLENATTCEVFDFNTNAWRYVSPTAPYREETKILSFDLHTETFRVVSKAPFTNVKAFDIVMCNLGNRLCVSEKNWPNQVIWSFNSGNKTWHKMFSINLDVTSHWFGNHIAAVMPLALFYEKKKKKKLLFYCRVRSRTLMVYDPETESYDVAFNDYSIGYPLCYFQSLISIS	K
6.59309	7564	1	11322718	11322738	3	7	100	0.37134	TGG	0.666667	0.402878	AT1G31640.1	AT1G31640	AGL92	Agamous-like MADS-box protein AGL92 [Source:UniProtKB/Swiss-Prot;Acc:Q9C6V4]	T/N, Cterm	MRTKTKLVLIPDRHFRRATFRKRNAGIRKKLHELTTLCDIKACAVIYSPFENPTVWPSTEGVQEVISEFMEKPATERSKTMMSHETFLRDQITKEQNKLESLRRENRETQLKHFMFDCVGGKMSEQQYGARDLQDLSLFTDQYLNQLNARKKFLTEYGESSSSVPPLFDVAGANPPVVADQAAVTVPPLFAVAGANLPVVADQAAVTVPPLFAVAGANLPVVADQAAVNVPTGFHNMNVNQNQYEPVQPYVPTGFSDHIQYQNMNFNQNQQEPVHYQALAVAGAGLPMTQNQYEPVHYQSLAVAGGGLPMSQLQYEPVQPYIPTVFSDNVQYQHMNLYQNQQEPVHYQALGVAGAGLPMNQNQYEPVQPYVPTGFSDHFQFENMNLNQNQQEPVQYQAP…	T
9.83342	15746	1	17436847	17436868	3	7.3	100	0.435838	AGA	0.333333	0.244444		AT1G47510	5PTASE11	ARABIDOPSIS THALIANA INOSITOL POLYPHOSPHATE 5-PHOSPHATASE 11	protein,weirdly annotated so no aa,Nterm		R
6.96751	25822	1	30416073	30416098	3	8.7	91	0.530293	ATC	0.333333	0.355556	AT1G80960.2	AT1G80960	N/A	F-box protein At1g80960 [Source:UniProtKB/Swiss-Prot;Acc:Q9SAG4]	Nterm	MERSSSSSSSSCDKVWNLGLPYPTFTLANDDKPYLITVSDDHSVKVKNVDWISKLPDDVLLIILSRLSTEEAIRTSVVSKRWEHVWNQMSHLVFDMRKNIINSNNTLDGSNPVATLITQVINNHRGHLESCVIIHVPYQGGNGMLNSWIRLLSCVKRTKVLTLRYHYGTWDRKFKTFNFSPDSLSHPSLMSLSLHSYFLESSHPLRNCSNLRTLKLLSIVAPEIGVFNRVLASCPCLEVLVLGICCFKKSRVPLKIENKKLKLLQVSSLERIDAIEVSTTSLDILAIIDICCRRDDLSLQSPQLQFNRNFWVLGPYVPHISYNISEEKSIGNEEFVNTIYGELLRPFANLYVALSVSVDLMNPTEVERLRQVLGLWTRKILELEIIFKDNNGPREENKS…	S
7.76292	35201	2	7039826	7039849	3	8	100	0.573207	ACC	0.666667	0.518519	AT2G16250.1	AT2G16250	N/A	Probable LRR receptor-like serine/threonine-protein kinase At2g16250 [Source:UniProtKB/Swiss-Prot;Acc:C0LGK4]	Cterm	MVDQRRSALGFVLLLLCLVLFFDCVVVGQTQSRFSEKLILLNLRSSLGLRGTDWPIKGDPCVDWRGIQCENGSIIGINISGFRRTRIGKLNPQFSVDPLRNLTRLSYFNASGLALPGTIPEWFGVSLLALEVLDLSSCSVNGVVPFTLGNLTSLRTLNLSQNSLTSLVPSSLGQLLNLSQLDLSRNSFTGVLPQSFSSLKNLLTLDVSSNYLTGPIPPGLGALSKLIHLNFSSNSFSSPIPSELGDLVNLVDFDLSINSLSGSVPQELRKLSKLQLMAIGDNLLSGTLPVDLFSAESQLQTLVLRENGFSGSLPDVCWSLPKLRILDIAKNNFTGLLPYSSYDSDQIAEMVDISSNTFYGELTPILRRFRIMDLSGNYFEGKLPDYVTGENVSVTSNCL…	G
4.22262	39221	2	11548019	11548046	3	9.3	100	0.78188	AGC	0.666667	0.392593	AT2G27050.1	AT2G27050	EIL1	ETHYLENE INSENSITIVE 3-like 1 protein [Source:UniProtKB/Swiss-Prot;Acc:Q9SLH0]	Cterm	MMMFNEMGMYGNMDFFSSSTSLDVCPLPQAEQEPVVEDVDYTDDEMDVDELEKRMWRDKMRLKRLKEQQSKCKEGVDGSKQRQSQEQARRKKMSRAQDGILKYMLKMMEVCKAQGFVYGIIPEKGKPVTGASDNLREWWKDKVRFDRNGPAAIAKYQSENNISGGSNDCNSLVGPTPHTLQELQDTTLGSLLSALMQHCDPPQRRFPLEKGVSPPWWPNGNEEWWPQLGLPNEQGPPPYKKPHDLKKAWKVGVLTAVIKHMSPDIAKIRKLVRQSKCLQDKMTAKESATWLAIINQEEVVARELYPESCPPLSSSSSLGSGSLLINDCSEYDVEGFEKEQHGFDVEERKPEIVMMHPLASFGVAKMQHFPIKEEVATTVNLEFTRKRKQNNDMNVMVMD…	Q
4.46096	39427	2	11799931	11799994	6	10.7	91	0.896381	TCAACA	0.333333	0.407407	AT2G27660.1	AT2G27660	N/A	Cysteine/Histidine-rich C1 domain family protein [Source:TAIR;Acc:AT2G27660]		MGKPTTQNNSFINHFSHPHRLQLTPATSSPPCSACKLTGGNGRVYSCRPCNFSLHESCSKMKQVITHPSHPSHTLSLLVAPVYDGGYFNCDGCGIHGTGFSYQCSVCDFDIHALCAYKPLSIIHKSHPQHNLKLAFQSPYGANKGFSCDICRKIGKNQWLYRCIPCEFDAHVGCITGPNPHLLQHSTSAPNPHTHHAGHPQHQNSLPVPNQGSNRVRPMPMTRPNRTINPNRPIAQNAAVNGPRRQNNNLGYNAQVGPNGPNELTGQGSMDGSGYNGSASATNKEFDVDVDVDVDVDVDVDVDVEVEYEGDVYVEEANDEGEDVDGNDEGEDVDGNGLEIVACVDNLSVAYSESDFGSSSDARSQCNDLSDADLYPLSLDNTQGPRPVRMNQGSGGGRK…	DV
4.94163	43174	2	17160433	17160452	3	6.7	100	0.303382	CTA	0.333333	0.382353	AT2G41170.1	AT2G41170	N/A	F-box protein At2g41170 [Source:UniProtKB/Swiss-Prot;Acc:Q6NKN8]		MEKQYLTFISFCFSITICGFLIVSWLARSIIRNGIRTLTWRKETKRKKKNQEDENKMSLLDLPDLTLDCILEKLSPSELCAMTSVCSELRDKCVSDHLWEKHMETKWGRLMGDAAIQEWKSHVATIMRCLTSSSSSSRKSKPNWSSRFVANLKPFAWLSSNHGCENRGSSSYLAPIDSVMYWYSNLENGKFWFPAQVYNRENGHVGFMMSCYDAKIRYDFKTDTFQARYSAHGRRAAEEKVTWQRLRPSQDDTKSRDLHVSDCLHGLRPGDHFEIQWRRTKEFPYGWWFGIVGHLQNCDGVQNCRCDSDENVVMEFRQFRPESPWRRTVIKRKDHRETGNEENGFYGGVKKLGTEEEISTWKQLWPSQALE	S
4.24189	44199	2	18878684	18878705	3	7.3	100	0.435838	TGA	0.333333	0.37037	AT2G45880.1	AT2G45880	BAM7	Beta-amylase 7 [Source:UniProtKB/Swiss-Prot;Acc:O80831]	Cterm	MATDMHKLLGTSEEDDDEEMDMDVKEEDDGDRRNRDKHAASGSSSNDEFMFQQSMQDQVGTPGGGGSRRSRPLEEKERTKLRERHRRAITARILGGLRRHGNYNLRVRADINDVIAALAREAGWVVLPDGTTFPSKSQGTKPTGGSSAVAAGSSASHIASQQTSPPALRVVSSGLRSPVELSSCRMKGVFTPAPSPYDMLPIQSPELVGSVNKAEGLVGCSVDVINSKQILEIPPNLTEQDFSGTPYVPVYVMLPLGVINMKCELADRDGLLKHLRILKSIHVDGVKVDCWWGIVEGHSPQEYNWTGYRQLFQMVRDLNLKIQVLMSFHECGGNVGDDVCIPLPHWVAEIGRTNPDIYFTDREGRRNPECLSWGIDKERILRGRTALEVYFDYMRSFRI…	H
4.3776	44242	2	18979874	18979893	3	6.7	100	0.303382	GAA	0.333333	0.426471	AT2G46220.1	AT2G46220	N/A	Uncharacterized conserved protein (DUF2358) [Source:TAIR;Acc:AT2G46220]		MAFLVRSPEIPTVSARIFSDANSSVISHVFMRRKATVSAIDARDLPGVKNPKSRLYWQFSAPVKEDYKISREEEEEEEEDKQSYYVNMGHAVRSIREEFPLLFYKELNFDIYRDDIVFKDPMNTFMGIDNYKSIFGALRFHGRIFFRALCVDIVSVWQPTENTLMIRWTVHGIPRGPWETRGRFDGTSEYKFDKNGKIYEHKVDNIAINSPPKFQMLTVQELVEAISCPSTPKPTYFEFGD	E
5.01357	63623	3	21470370	21470408	3	13	100	1.09264	GTT	0.333333	0.481481	AT3G57990.1	AT3G57990	N/A	unknown protein; Has 1497 Blast hits to 1323 proteins in 52 species: Archae - 0; Bacteria - 4; Metazoa - 23; Fungi - 34; Plants - 61; Viruses - 0; Other Eukaryotes - 1375 (source: NCBI BLink). [Source:TAIR;Acc:AT3G57990]		MKASMKFREEQKPLFRAKVPLSILGLPFQSGIVAGESKELSLNLSTFFESGPSLKVAYRPNDSWNPFSLIVKTGSGSFGSPISSSMLMSAEFNLLGQGNPSFMLHFKPQFGDFSIKKSHSSSGFERNLIKSMNGSVSEDDSSIEVVDTPAVNGCGGGFRKVTVLPSTSAGDIAGLLSGVEVAARTSLPVRGRAVLNFRWGVRVPTEIRRDFDPTAAISLRRFPFLVMNKIGIEHVDGADAKVTKSTGDPGKVSGPAQFTTSGDVAEVIEELRTENKQLKRAVEDLREVISNVRPYSPATIDYGSHSKYRESERNNNNNNNNNNNNNGRSRADRWSSERTTTSDYGGKKSKEEGNVAEELKKALKGAA	N
3.67723	64270	3	22464634	22464656	3	7.7	100	0.516554	ATC	0.333333	0.392593		AT3G60790		F-box family protein	Nterm	MTTQSSSSSSSLPSSLSSTPPLLASNARCKVLRTGASSKGKGKGIKYPVDRISMLPDEMLQKILSTLSTKDAVITSTLSKRWVDQWKRIPHLCVDMRNIMRTNPTSYVHELSFRFAESMTKTLNNHRGHLESCTISHIQFIFLFIDRWIQTVTREKQTKEITLVNNIGCMTPFVRYNSLHLSPSAFCHPSLTSLSLTRYKLLEKAFKNCCNLKILKLYDIMSDVSVLSNVIKACSSLEVLVLQITFLNQASALKIENKKLEFLQVTWPCLMNRMEVNTPRLVIFDIKSIYCFGYSVEAPKLSMFKRDYWVGGMSYPHLSYHISSLAQEKIRIWLELMVSQIYHMKRTGSLSVSVDVRNPNEVEILKEVLLLWDGEMMDLEILFKNNNAPIEEGESFITG…	S
4.10101	67684	4	2619260	2619282	3	7.7	100	0.516554	CAT	0.333333	0.391304		AT4G05100		ATMYB74		MGRSPCCEKKNGLKKGPWTPEEDQKLIDYINIHGYGNWRTLPKNAGLQRCGKSCRLRWTNYLRPDIKRGRFSFEEEETIIQLHSIMGNKWSAIAARLPGRTDNEIKNYWNTHIRKRLLKMGIDPVTHTPRLDLLDISSILSSSIYNSSHHHHHHHQQHMNMSRLMMSDGNHQPLVNPEILKLATSLFSNQNHPNNTHENNTVNQTEVNQYQTGYNMPGNEELQSWFPIMDQFTNFQDLMPMKTTVQNSLSYDDDCSKSNFVLEPYYSDFASVLTTPSSSPTPLNSSSSTYINSSTCSTEDEKESYYSDNITNYSFDVNGFLQFQ	H
7.45568	82390	5	904563	904590	3	9.3	100	0.78188	AAG	0.333333	0.411765	AT5G03570.1	AT5G03570	IREG2	Solute carrier family 40 member 2 [Source:UniProtKB/Swiss-Prot;Acc:F4KGN5]	Nterm	MEEETETRVFLSNEQHQEEEEEEEEEPSLPRSMVISLYLGYFLARWGARTWEFSVALYMIYLWPNSLFLTAMYGVVESGSATLFGPIVGQMIDGMSYVKVLRLWLVTQNLSFIVAGGAVVALLVVPDLKSQNFPVFATLVVLTNLSGAIGVLSTLAGTVLIERDWVVVMSEGHSPAVLTRMNSVIRGIDLSSKLLSPVITGLIISFVSLRASAITFAAWATITVWIEYWLFISVYNGVPAIVQSDERRSLRSSQSQAEETDSASSFYVPLLHEEESYRNTQSRSRILRILERISESSFVSAWRNYLNQEIVLPGVSLALLFFTVLSFGTLMTATLEWKGIPTYIIGIGRGISAGVGLAATVLYPLMQSRISPLRTGVWSFWSQWTCLLVCVGSIWVEKE…	E
3.80931	87214	5	8083353	8083441	3	29.7	93	0.865453	GAT	0.333333	0.423358	AT5G23950.1	AT5G23950	N/A	Calcium-dependent lipid-binding (CaLB domain) family protein [Source:TAIR;Acc:AT5G23950]	Cterm, D/A/D (first D)	MSSHGREVEVTISSAKDIKNVNWRNGPNKPYAVVWIDPKFKSSTRVDEDGNTCTTWNETFVIALPPANDDDDKVYINIVHAGREENTKPLIGSAHLSLRDVIDDVGFGVPFMKTLKLKRPSGRPQGKLDVTVTVRETPGSNYALPYGDPYAPEKGSKFGGMGTGLAVGAVAGVLGGVALAEGLEAVEGDEDDDDDDDAAAAAAADDDDDDDDDDDDDDE	D
9.66351	87329	5	8200568	8200587	3	6.7	100	0.303382	CAT	0.333333	0.407407	AT5G24190.1	AT5G24190	N/A	Lipase class 3-related protein [Source:TAIR;Acc:AT5G24190]		MPDVKLDIRCILDNLHQGPRTIHAIQAIRAMIDKHSESAIWLAGHSLGAALVLLAGKTMKISGFLLESYIFNPPIISIPLEQLPGGVLLKGVFRITESLVKATAATVTMALTDQRVQEDSKTALWIPYLYVNPADPICAGYIDYFKHKIFMSKIGASHIERIGSRSSFRNPWTRRIGTSSSSSSPLSDLSMEPLHLLPSADMTVNKNKSASSMAAHGLHQWWEQDSVLRKNWKNCLIRPDPGDKS	S
4.459	95711	5	15010749	15010773	3	8.3	100	0.6266	CTC	0.666667	0.481481	AT5G37790.1	AT5G37790	N/A	Protein kinase superfamily protein [Source:TAIR;Acc:AT5G37790]	multiple STRs,E/A	MGFYEGASVHPRTPENKNTVNIPILTSSSSSSDLDGDNNDNNNNTGIKTLLKRMIFDLGFACFLPPLSSTENSGNNNGGGTSGGGGGGGGGGENNKAWLLAETAPENMNPDPHSVHSSFRFSLCSQIELEKMKGEEPSLSASSSCRNLSVSGGSTTVLMVNLENGVKETTGNATDDLRWTRARSLEKSISPVANTLVRFSYGEIVAATRNFSKGRVLGRGACSYVFRGKIGMWRTALAIKRLDKEDKESPKSFCRELMIASSLHSSNIVPLLGFCIDPEEGLFLVYKYVSGGSLEHYLHDKKKKKGVKAAFGLPWSARYKVALGIADAIAYLHNGTEQCVVHRDIKPSNILLSSKKIPKLCDFGLATWTAAPSVPFLCKTVKGTFGYLAPEYFQHGKIS…	E
5.07284	96343	5	15464170	15464190	3	7	100	0.37134	GTT	0.333333	0.348148	AT5G38620.1	AT5G38620	N/A	MADS-box transcription factor family protein [Source:TAIR;Acc:AT5G38620]		MVKGTKRKIAIETIQKRDSLRVTCTKRRKGLYSKASQLCLLSDAQIAILATPPSSESDVSFYSFGHSSVDAVVSAFLSGKRPVSAPKDNKETREDVGICLTRKNLGLGFWWNDESLVRSENPQEISEAIGSMWTLLSNLKELRADEACVNDHKDLKKNEKSDVHGTQDQTLIFQSASAVCCIPENLNDITQEPNQTLDIQSSSSAICCVPDKSPEIFNEITEEQDQILSICETFCVTDNNNNNNNNAALPEVNLYYNQDMAIDQLIDFNTPFESSIDDWFSDNTTHQETTSASILNDVGVDDQVSVDTNPFSYFQSLEDADLVFQRCLDGDNLRFSDCFNDFANTIAAV	N
3.86309	101400	5	21411193	21411214	3	7.3	100	0.435838	TAC	0.333333	0.4	AT5G52830.1	AT5G52830	WRKY27	Probable WRKY transcription factor 27 [Source:UniProtKB/Swiss-Prot;Acc:Q9FLX8]	multiple STRs	MSSEDWDLFAVVRSCSSSVSTTNSCAGHEDDIGNCKQQQDPPPPPLFQASSSCNELQDSCKPFLPVTTTTTTTWSPPPLLPPPKASSPSPNILLKQEQVLLESQDQKPPLSVRVFPPSTSSSVFVFRGQRDQLLQQQSQPPLRSRKRKNQQKRTICHVTQENLSSDLWAWRKYGQKPIKGSPYPRNYYRCSSSKGCLARKQVERSNLDPNIFIVTYTGEHTHPRPTHRNSLAGSTRNKSQPVNPVPKPDTSPLSDTVKEEIHLSPTTPLKGNDDVQETNGDEDMVGQEVNMEEEEEEEEVEEDDEEEEDDDDVDDLLIPNLAVRDRDDLFFAGSFPSWSAGSAGDGGG	T
3.70627	98378	5	17507387	17507415	2	14.5	100	1.1022	TA	0	0.222222	AT5G43570	AT5G43570		Predicted to encode a PR (pathogenesis-related) peptide that belongs to the PR-6 proteinase inhibitor family.	Cterm	MSDVCQNTAGEGMKSSWPELVGRRGEEVKEIIDRENTKVTAKIISENAVVLAVVICDRVYVRVNDQGIVTRTPISLANLIVIYIYIYIYICVCVCESIMDLNM	IY
3.69989	8749	Chr1	12361150	12361169	2	10	100	0.855577	GA	0.5	0.392593	AT1G34010	AT1G34010.2	N/A	N/A	Nterm	MSFAFSITKLTNPTKAHQSLSLSLSPLLSALPPAFSPVRLSDPSGIWSLCTKRLLLECANETILEMLFAAEGGGFFSSSASGYSNGLALLLLGQKTEQKPIKVSSQWNHYHLVLEDSDTGFRLDSSKNWLSSACTSLICFGRKSERLESEGKKDEAPSVEDYNNCEVTNRFALKSSLKKRSFSDVVIGDDDVSRDGVVDHIDRRKVQWPDTCGIEIAEVREFEPSEVDESEDEFHHGSGKSCMCTIM	SL
7.57573	84110	Chr5	3433738	3433757	3	6.7	100	0.303382	AGG	0.666667	0.496296	AT5G10880	AT5G10880	tRNA synthetase-related / tRNA ligase-like protein		Cterm	MVKETRLGITAKKDEDFGKWYSEACRFGELVEYYESVKGCYILKPSGISDEYLERYTNTTLKGLLQRLLGLQELVDKRTQGPPFEAACMTHGDDKGLVFPPKVAPVQVVVIHVPIKGAADYQELCDACEAVESTLLGAGIRAEADIRDNYSCGWKYADQELTGVPLRIETGPRDLANDQVRIVTRDNGAKMDVKRGDLIEQVKDLLEKIQSNLYDVAKRKVEECTQKVETWDEFVEALSQKKLILAPWCDKVEVEKDVKRRTRGDETGGGGGGAKTLCTPLEQPELGEETLCFASGKPAKKWSYWGRSY	G
11.395	19084	Chr1	21181668	21181689	3	7.3	100	0.435838	CTT	0.333333	0.397059	AT1G56540	AT1G56540	Disease resistance protein (TIR-NBS-LRR class) family		Nterm	MASSSSSSSRRTWRYNVFTSFHGPDVRKTFLSHLRKQFNYNGITMFDDQRIERSQIIAPALTEAIRESRIAIVLLSKNYASSSWCLDELLEILDCKEQLGQIVMTVFYGVHPSDVRKQTGDFGIAFNETCARKTEEQRQKWSQALTYVGNIAGEHFQNWDNEAKMIEKIASDVSDKLNTTPSRDFDGMIGLEAHLRKIESLLDLDYDGAKIVGISGPAGIGKSTIARALHSVLSKRFQHNCFMDNLHESYKIGLVEYGLRLRLQEQLLSKILNLDGIRIAHLGVIRERLHDQKVLIILDDVESLDQLDALANIEWFGPGSRVIVTTENKEILQQHGISDIYHVGFPSSKEALMIFCLSAFRQLSPPDRFMNLAAEVAKLCGYLPLALHVLGSSLRGKNY…	S
3.6682	44082	2	18706188	18706207	3	6.7	100	0.303382	GTT	0.333333	0.464286	AT2G45400	AT2G45400	BEN1	BRI1-5 ENHANCED 1, involved in the regulation of brassinosteroid metabolic pathway	Nterm	MVREEQEEDDNNNNNNGGGERKLLVADETVPSLLDETGLVCVTGGSGFVASWLIMRLLQRGYSVRATVRTNSEGNKKDISYLTELPFASERLQIFTADLNEPESFKPAIEGCKAVFHVAHPMDPNSNETEETVTKRTVQGLMGILKSCLDAKTVKRFFYTSSAVTVFYSGGNGGGGGEVDESVWSDVEVFRNQKEKRVSSSYVVSKMAAETAALEFGGKNGLEVVTLVIPLVVGPFISSSLPSSVFISLAMLFGNYKEKYLFDTYNMVHIDDVARAMIFLLEKPVAKGRYICSSVEMKIDEVFEFLSTKFPQFQLPSIDLNKYKVEKRMGLSSKKLKSAGFEFKYGAEEIFSGAIRSCQARGFL	N

## Sheet: utr_purifying_strs
Log(SD)	Unit.Size	X..of.Units	Purity	TRF.score	VARscore	Consensus	Size.of.Locus	annotation	chr	start	stop	transposon	gene	all_annotation	DHS	gene	name	description
-0.30103	3	8	90	41	0.379879	TCT	24	UTR	Chr5	23733503	23733526	0	AT5G58760	gene,mRNA,CDS,exon,mRNA,exon,five_prime_UTR,protein	1	AT5G58760	DDB2	Protein DAMAGED DNA-BINDING 2 [Source:UniProtKB/Swiss-Prot;Acc:Q6NQ88]
-0.220359	3	8.3	91	40	0.457624	TTC	24.9	UTR	Chr5	24140428	24140454	0	AT5G59950	gene,mRNA,mRNA,mRNA,mRNA,five_prime_UTR,exon,mRNA,protein,protein,protein,protein	0	AT5G59950	ALY1	THO complex subunit 4A [Source:UniProtKB/Swiss-Prot;Acc:Q8L773]
-0.220359	4	6.2	95	43	0.0798214	AGAA	24.8	UTR	Chr5	25254251	25254275	0	AT5G62920	gene,mRNA,exon,five_prime_UTR	1	AT5G62920	ARR6	Two-component response regulator ARR6 [Source:UniProtKB/Swiss-Prot;Acc:Q9ZWS6]
-0.161832	3	8.3	91	45	0.457624	AAG	24.9	UTR	Chr5	26608762	26608787	0	AT5G66658	gene,mRNA,exon,three_prime_UTR	0	AT5G66658	N/A	N/A
0.218303	2	10.5	100	42	0.908802	AT	21	UTR	Chr5	26905603	26905623	0	AT5G67420	gene,mRNA,exon,five_prime_UTR,mRNA,exon,five_prime_UTR	1	AT5G67420	LBD37	LOB domain-containing protein 37 [Source:UniProtKB/Swiss-Prot;Acc:Q9FN11]
-0.30103	4	7	91	42	0.217201	TAAA	28	UTR	Chr1	3878559	3878586	0	AT1G11545	gene,mRNA,three_prime_UTR,exon	0	AT1G11545	XTH8	Probable xyloglucan endotransglucosylase/hydrolase protein 8 [Source:UniProtKB/Swiss-Prot;Acc:Q8L9A9]
0.0400652	2	13.5	92	47	1.02035	AG	27	UTR	Chr1	26364650	26364676	0	AT1G70000	gene,mRNA,exon,five_prime_UTR,mRNA,exon,five_prime_UTR	1	AT1G70000	N/A	N/A
-0.30103	3	8.7	91	45	0.530293	TTG	26.1	UTR	Chr1	27128869	27128894	0	AT1G72100	gene,mRNA,exon,three_prime_UTR	0	AT1G72100	N/A	N/A
0.104207	2	11.5	100	46	0.993576	CT	23	UTR	Chr1	27256978	27257000	0	AT1G72410	gene,mRNA,mRNA,exon,five_prime_UTR	1	AT1G72410	N/A	N/A
0.123432	2	10	100	40	0.855577	AT	20	UTR	Chr1	28708457	28708476	0	AT1G76510	gene,mRNA,three_prime_UTR,exon,mRNA,exon,three_prime_UTR	1	AT1G76510	ARID5	AT-rich interactive domain-containing protein 5 [Source:UniProtKB/Swiss-Prot;Acc:Q0WNR6]
-0.30103	3	8	90	41	0.379879	AAG	24	UTR	Chr1	29187767	29187790	0	AT1G77660	gene,mRNA,exon,five_prime_UTR	1	AT1G77660	N/A	N/A
-0.0666566	2	10	100	40	0.855577	GT	20	UTR	Chr1	30412221	30412240	0	AT1G80940	gene,mRNA,mRNA,exon,three_prime_UTR,gene,mRNA,three_prime_UTR,exon	0	AT1G80940	N/A	N/A
0.119043	2	10.5	100	42	0.908802	AG	21	UTR	Chr1	4989584	4989604	0	AT1G14580	gene,mRNA,five_prime_UTR,exon,mRNA,exon,five_prime_UTR,mRNA,exon,five_prime_UTR	1	AT1G14580	IDD6	Protein indeterminate-domain 6, chloroplastic [Source:UniProtKB/Swiss-Prot;Acc:Q8RWX7]
-0.158158	3	9.3	92	46	0.646654	CAT	27.9	UTR	Chr2	14548117	14548146	0	AT2G34520	gene,mRNA	0	AT2G34520	N/A	N/A
-0.30103	3	8	90	41	0.379879	CAT	24	UTR	Chr2	15229065	15229088	0	AT2G36320	gene,mRNA,exon,five_prime_UTR	1	AT2G36320	SAP4	Zinc finger A20 and AN1 domain-containing stress-associated protein 4 [Source:UniProtKB/Swiss-Prot;Acc:Q9SJM6]
-0.00366522	2	10.5	100	42	0.908802	AG	21	UTR	Chr2	18620092	18620112	0	AT2G45160	gene,mRNA,exon,five_prime_UTR	1	AT2G45160	SCL27	Scarecrow-like protein 27 [Source:UniProtKB/Swiss-Prot;Acc:Q7XJM8]
-0.0136262	3	10.3	96	57	0.840458	AAG	30.9	UTR	Chr2	19562990	19563021	0	AT2G47750	exon,five_prime_UTR,gene,mRNA	0	AT2G47750	GH3.9	Putative indole-3-acetic acid-amido synthetase GH3.9 [Source:UniProtKB/Swiss-Prot;Acc:O82243]
-0.30103	3	8.3	90	43	0.438104	CTT	24.9	UTR	Chr3	3578455	3578479	0	AT3G11400	gene,mRNA,five_prime_UTR,exon,mRNA,five_prime_UTR,exon	1	AT3G11400	N/A	N/A
0.149189	2	11.5	100	46	0.993576	AT	23	UTR	Chr3	4498043	4498065	0	AT3G13730	gene,mRNA,three_prime_UTR,exon,mRNA,three_prime_UTR,exon	1	AT3G13730	CYP90D1	3-epi-6-deoxocathasterone 23-monooxygenase [Source:UniProtKB/Swiss-Prot;Acc:Q94IA6]
0.0558589	2	10.5	100	42	0.908802	GA	21	UTR	Chr3	7464983	7465003	0	AT3G21260	gene,mRNA,mRNA,mRNA,exon,five_prime_UTR,protein,protein	1	AT3G21260	GLTP3	Glycolipid transfer protein 3 [Source:UniProtKB/Swiss-Prot;Acc:Q9LU33]
-0.114023	3	7	100	42	0.37134	AAT	21	UTR	Chr3	15222267	15222287	0	AT3G43270	gene,mRNA,three_prime_UTR,exon	0	AT3G43270	PME32	Probable pectinesterase/pectinesterase inhibitor 32 [Source:UniProtKB/Swiss-Prot;Acc:Q9LXK7]
-0.00627757	2	10.5	100	42	0.908802	AG	21	UTR	Chr4	75334	75354	0	AT4G00180	gene,mRNA,exon,five_prime_UTR,mRNA,exon,five_prime_UTR	0	AT4G00180	YAB3	Axial regulator YABBY 3 [Source:UniProtKB/Swiss-Prot;Acc:Q9XFB1]
-0.30103	3	7	100	42	0.37134	ATT	21	UTR	Chr4	2457587	2457607	0	AT4G04850	gene,mRNA,exon,three_prime_UTR,mRNA,exon,three_prime_UTR	0	AT4G04850	KEA3	K(+) efflux antiporter 3, chloroplastic [Source:UniProtKB/Swiss-Prot;Acc:Q9M0Z3]
0.0725309	2	10.5	100	42	0.908802	CT	21	UTR	Chr1	10283045	10283065	0	AT1G29370	gene,mRNA,exon,five_prime_UTR	0	AT1G29370	N/A	N/A
-0.30103	3	6.7	100	40	0.303382	TCA	20.1	UTR	Chr1	10327571	10327590	0	AT1G29535	gene,mRNA,exon,three_prime_UTR,mRNA,exon,three_prime_UTR,gene,mRNA,exon,CDS,protein	0	AT1G29535	N/A	N/A
-0.30103	3	8	90	41	0.379879	TTC	24	UTR	Chr4	5803884	5803907	0	AT4G09080	gene,mRNA,exon,five_prime_UTR	0	AT4G09080	TOC75-4	Protein TOC75-4, chloroplastic [Source:UniProtKB/Swiss-Prot;Acc:Q5IZC8]
0.0582193	2	10.5	100	42	0.908802	TC	21	UTR	Chr4	9827535	9827555	0	AT4G17650	gene,mRNA,five_prime_UTR,exon	1	AT4G17650	N/A	N/A
-0.15169	3	8	91	43	0.399598	AGA	24	UTR	Chr4	13372300	13372324	0	AT4G26470	gene,mRNA,exon,CDS,mRNA,CDS,exon,mRNA,exon,three_prime_UTR,protein,protein	0	AT4G26470	CML21	Probable calcium-binding protein CML21 [Source:UniProtKB/Swiss-Prot;Acc:Q52K82]
-0.30103	3	7	100	42	0.37134	AAG	21	UTR	Chr4	14199126	14199146	0	AT4G28730	gene,mRNA,five_prime_UTR,exon,mRNA,five_prime_UTR,exon	1	AT4G28730	GRXC5	Glutaredoxin-C5, chloroplastic [Source:UniProtKB/Swiss-Prot;Acc:Q8GWS0]
-0.30103	3	8.3	90	43	0.438104	GGA	24.9	UTR	Chr4	14446851	14446875	0	AT4G29330	gene,mRNA,CDS,exon,mRNA,exon,three_prime_UTR,protein	0	AT4G29330	DER1	Derlin-1 [Source:UniProtKB/Swiss-Prot;Acc:Q8VZU9]
-0.30103	3	10	92	53	0.747237	GAA	30	UTR	Chr4	14917485	14917514	0	AT4G03275	gene,transcript_region,transcript_region,exon	0	AT4G03275	N/A	N/A
-0.106068	2	13.5	92	47	1.02035	GA	27	UTR	Chr4	15324546	15324572	0	AT4G31620	gene,mRNA,exon,five_prime_UTR,mRNA,protein	0	AT4G31620	N/A	N/A
-0.0183119	2	10	100	40	0.855577	TC	20	UTR	Chr4	15676454	15676473	0	AT4G32480	gene,mRNA,five_prime_UTR,exon	1	AT4G32480	N/A	N/A
-0.30103	3	7	100	42	0.37134	TCA	21	UTR	Chr4	16111144	16111164	0	AT4G33495	gene,mRNA,exon,three_prime_UTR	0	AT4G33495	RPD1	Protein ROOT PRIMORDIUM DEFECTIVE 1 [Source:UniProtKB/Swiss-Prot;Acc:Q689D6]
-0.30103	3	8.3	90	43	0.438104	TCT	24.9	UTR	Chr5	577020	577044	0	AT5G02560	gene,mRNA,exon,three_prime_UTR,gene,mRNA,exon,CDS,protein	0	AT5G02560	N/A	Probable histone H2A.4 [Source:UniProtKB/Swiss-Prot;Acc:Q9LZ46]
0.0964267	2	11	100	44	0.954678	GA	22	UTR	Chr5	2666021	2666042	0	AT5G08290	gene,mRNA,five_prime_UTR,exon,mRNA,exon,five_prime_UTR	0	AT5G08290	YLS8	Thioredoxin-like protein YLS8 [Source:UniProtKB/Swiss-Prot;Acc:Q9FE62]
-0.30103	3	8.3	90	43	0.438104	ATG	24.9	UTR	Chr5	6251807	6251831	0	AT5G18735	gene,mRNA,exon,CDS,protein,gene,mRNA,exon,three_prime_UTR	0	AT5G18735	N/A	N/A
0.0358384	2	11	100	44	0.954678	GA	22	UTR	Chr5	7084706	7084727	0	AT5G20885	gene,mRNA,exon,five_prime_UTR	1	AT5G20885	N/A	N/A
-0.30103	3	8.7	91	45	0.530293	GAA	26.1	UTR	Chr5	7956731	7956756	0	AT5G23590	gene,mRNA,exon,five_prime_UTR,gene,mRNA,exon,three_prime_UTR	0	AT5G23590	N/A	N/A
0.213033	2	10	100	40	0.855577	TA	20	UTR	Chr5	8600316	8600335	0	AT5G24960	three_prime_UTR,exon,gene,mRNA,mRNA,protein	0	AT5G24960	CYP71A14	Cytochrome P450 71A14 [Source:UniProtKB/Swiss-Prot;Acc:P58045]
0.0982757	2	10	100	40	0.855577	GA	20	UTR	Chr5	9055187	9055206	0	AT5G25940	gene,mRNA,exon,five_prime_UTR	1	AT5G25940	N/A	N/A
-0.0727155	2	13	91	45	0.982079	TG	26	UTR	Chr5	12599750	12599775	0	AT5G33355	exon,three_prime_UTR,gene,mRNA	0	AT5G33355	N/A	Defensin-like protein 207 [Source:UniProtKB/Swiss-Prot;Acc:Q3E8R5]
-0.137167	3	8.7	92	47	0.548103	AAG	26.1	UTR	Chr5	14984444	14984470	0	AT5G37720	gene,mRNA,mRNA	0	AT5G37720	ALY4	THO complex subunit 4D [Source:UniProtKB/Swiss-Prot;Acc:Q6NQ72]
0.0491669	2	10	100	40	0.855577	AT	20	UTR	Chr5	16881174	16881193	0	AT5G42230	gene,mRNA,mRNA	0	AT5G42230	SCPL41	Serine carboxypeptidase-like 41 [Source:UniProtKB/Swiss-Prot;Acc:Q9FH06]
0.259324	2	20	100	80	0.969646	TA	40	UTR	Chr5	17757516	17757555	0	AT5G44120	gene,mRNA,mRNA,mRNA,exon,five_prime_UTR,protein,protein	0	AT5G44120	CRA1	12S seed storage protein CRA1 [Source:UniProtKB/Swiss-Prot;Acc:P15455]
-0.30103	3	6.7	100	40	0.303382	AAG	20.1	UTR	Chr5	18166901	18166920	0	AT5G45000	gene,mRNA,CDS,exon,protein,gene,mRNA,three_prime_UTR,exon	0	AT5G45000	N/A	N/A
-0.30103	3	8	90	41	0.379879	TTC	24	UTR	Chr5	19317759	19317782	0	AT5G47690	gene,mRNA,exon,five_prime_UTR,mRNA,five_prime_UTR,exon,mRNA,mRNA,five_prime_UTR,exon	1	AT5G47690	N/A	N/A

## Sheet: utr_div_strs
STR_ID	Z-score	Unit.Size	Purity	N_Units	GC	scan_gc	annotation	Log(SD)	Unit.Size	X..of.Units	Purity	TRF.score	VARscore	Consensus	Size.of.Locus	annotation	chr	start	stop	transposon	gene	all_annotation	DHS	gene_name	description
25271	3.73	2	94	14.5	0.5	0.422222	UTR	0.615294	2	18.5	94	67	1.05165	TC	37	UTR	Chr1	29504552	29504587	0	AT1G78420	exon,five_prime_UTR,exon,five_prime_UTR,gene,mRNA,mRNA	1	N/A	N/A
3058	3.739	2	100	10	0.5	0.37037	UTR	0.719601	2	11	100	44	0.954678	AG	22	UTR	Chr1	5068581	5068602	0	AT1G14720	gene,mRNA,exon,five_prime_UTR	1	XTH28	Probable xyloglucan endotransglucosylase/hydrolase protein 28 [Source:UniProtKB/Swiss-Prot;Acc:Q38909]
82824	3.87439	2	95	21	0.5	0.362963	UTR	0.762237	2	21	95	77	0.970406	TC	42	UTR	Chr5	1507159	1507200	1	AT5G05100	gene,mRNA,exon,five_prime_UTR,transposable_element,transposon_fragment	1	N/A	N/A
3146	3.88319	2	100	9	0.5	0.426471	UTR	0.648559	2	20	100	80	0.969646	CT	40	UTR	Chr1	5199100	5199139	0	AT1G15110	gene,mRNA,exon,five_prime_UTR,mRNA,exon,five_prime_UTR,mRNA,exon,five_prime_UTR	1	PSS1	CDP-diacylglycerol--serine O-phosphatidyltransferase 1 [Source:UniProtKB/Swiss-Prot;Acc:F4HXY7]
99330	3.90438	3	100	7	0.333333	0.325926	UTR	0.234262	3	7	100	42	0.37134	TTC	21	UTR	Chr5	18630621	18630641	0	AT5G45940	gene,mRNA,mRNA,exon,five_prime_UTR,mRNA,exon,five_prime_UTR	0	NUDT11	Nudix hydrolase 11 [Source:UniProtKB/Swiss-Prot;Acc:Q8LET2]
44124	3.91569	2	100	10.5	0.5	0.433824	UTR	0.766063	2	10.5	100	42	0.908802	TC	21	UTR	Chr2	18779484	18779504	0	AT2G45570	gene,mRNA,three_prime_UTR,exon	1	CYP76C2	Cytochrome P450 76C2 [Source:UniProtKB/Swiss-Prot;Acc:O64637]
74867	3.98637	3	100	7.7	0.333333	0.338235	UTR	0.408391	3	10.7	100	64	0.944588	TCT	32.1	UTR	Chr4	8195905	8195936	1	AT4G14220	transposable_element,transposon_fragment,gene,mRNA,five_prime_UTR,exon	1	RHF1A	E3 ubiquitin-protein ligase RHF1A [Source:UniProtKB/Swiss-Prot;Acc:Q4TU14]
40529	4.07385	3	100	10.8	0.333333	0.481481	UTR	0.843275	3	10.3	100	62	0.904241	CTT	30.9	UTR	Chr2	13194214	13194244	0	AT2G31010	gene,mRNA,exon,five_prime_UTR,mRNA,exon,five_prime_UTR	0	N/A	N/A
45525	4.08932	2	100	21	0.5	0.397059	UTR	0.807283	2	21	100	84	0.930793	GA	42	UTR	Chr3	1514898	1514939	1	AT3G05320	gene,mRNA,mRNA,exon,five_prime_UTR,mRNA,exon,five_prime_UTR,transposable_element,transposon_fragment	0	N/A	N/A
37301	4.09397	3	100	6.7	0.333333	0.348148	UTR	0.231603	3	6.7	100	40	0.303382	GAA	20.1	UTR	Chr2	9478907	9478926	0	AT2G22310	gene,mRNA,five_prime_UTR,mRNA,five_prime_UTR,exon	1	UBP4	Ubiquitin carboxyl-terminal hydrolase 4 [Source:UniProtKB/Swiss-Prot;Acc:Q8LAM0]
95706	4.18734	3	100	8	0.333333	0.340741	UTR	0.527027	3	7	100	42	0.37134	TCA	21	UTR	Chr5	15004737	15004757	0	AT5G37780	gene,mRNA,three_prime_UTR,exon,mRNA,mRNA,mRNA,three_prime_UTR,exon	0	CAM4	Calmodulin-1 [Source:UniProtKB/Swiss-Prot;Acc:P0DH95]
81794	4.21173	2	94	13	0.5	0.42963	UTR	0.720109	2	19	94	69	1.03897	GA	38	UTR	Chr4	18542659	18542696	0	AT4G09985	gene,antisense_lncRNA,exon,gene,mRNA,five_prime_UTR,exon	0	N/A	Natural antisense transcript overlaps with AT4G39990
33633	4.23444	2	93	15.5	0.5	0.4	UTR	0.716158	2	16.5	93	59	1.08306	TC	33	UTR	Chr2	6044219	6044251	1	AT2G14265	transposable_element,transposon_fragment,gene,mRNA,three_prime_UTR,exon	0	N/A	N/A
83936	4.26503	2	100	4.5	0	0.193548	UTR	0.626748	2	11.5	100	46	0.993576	TA	23	UTR	Chr5	3142761	3142783	0	AT5G10030	gene,mRNA	0	TGA4	Transcription factor TGA4 [Source:UniProtKB/Swiss-Prot;Acc:Q39162]
42965	4.29945	3	90	9.3	0.333333	0.385185	UTR	0.614731	3	8.3	90	43	0.438104	AAC	24.9	UTR	Chr2	16824348	16824372	0	AT2G40270	gene,mRNA,exon,five_prime_UTR,mRNA,exon,five_prime_UTR	1	N/A	Inactive receptor-like serine/threonine-protein kinase At2g40270 [Source:UniProtKB/Swiss-Prot;Acc:Q9SIZ4]
63088	4.37279	3	100	7	0.333333	0.375	UTR	0.265974	3	7	100	42	0.37134	ACA	21	UTR	Chr3	20648968	20648988	0	AT3G55660	gene,mRNA,three_prime_UTR,exon,mRNA,three_prime_UTR,exon	0	ROPGEF6	Rop guanine nucleotide exchange factor 6 [Source:UniProtKB/Swiss-Prot;Acc:Q9M056]
84219	4.48709	3	97	16.7	0.333333	0.311111	UTR	0.772271	3	16.7	97	95	1.10249	GTT	50.1	UTR	Chr5	3633463	3633513	0	AT5G11380	gene,mRNA,exon,three_prime_UTR,mRNA,mRNA,three_prime_UTR,mRNA,exon,three_prime_UTR	1	N/A	N/A
51238	4.54894	3	90	8	0.333333	0.407407	UTR	0.449693	3	8	90	41	0.379879	TTC	24	UTR	Chr3	10017494	10017516	0	AT3G27160	gene,mRNA,mRNA,five_prime_UTR,exon	1	N/A	N/A
43048	4.77183	3	94	9.3	0.333333	0.338235	UTR	0.803502	3	12.3	94	67	0.999768	TTC	36.9	UTR	Chr2	16925770	16925806	0	AT2G40520	exon,three_prime_UTR,exon,three_prime_UTR,exon,three_prime_UTR,gene,mRNA,mRNA,mRNA,mRNA,mRNA,mRNA	0	N/A	N/A
62492	4.79527	3	100	7.7	0.333333	0.385185	UTR	0.470567	3	17.7	100	106	1.07941	GAA	53.1	UTR	Chr3	19679175	19679227	0	AT3G53090	gene,mRNA,five_prime_UTR,exon,mRNA,five_prime_UTR,exon	0	UPL7	E3 ubiquitin-protein ligase UPL7 [Source:UniProtKB/Swiss-Prot;Acc:Q9SCQ2]
97248	4.82545	3	100	6.3	0.333333	0.408759	UTR	0.29966	3	9.3	100	56	0.78188	CTT	27.9	UTR	Chr5	16339929	16339956	0	AT5G40810	gene,mRNA,exon,five_prime_UTR,mRNA,exon,five_prime_UTR	1	CYC12	Cytochrome c1 2, heme protein, mitochondrial [Source:UniProtKB/Swiss-Prot;Acc:Q9FKS5]
43538	4.89082	2	90	22.5	0.5	0.444444	UTR	0.665284	2	28.5	90	93	0.88579	TC	57	UTR	Chr2	17701356	17701411	1	AT2G42500	gene,mRNA,mRNA,mRNA,mRNA,mRNA,exon,five_prime_UTR,transposable_element,transposon_fragment,gene,mRNA,exon,five_prime_UTR	1	PP2A4	Serine/threonine-protein phosphatase PP2A-4 catalytic subunit [Source:UniProtKB/Swiss-Prot;Acc:Q07100]
97512	5.03876	3	100	7.3	0.333333	0.364286	UTR	0.358648	3	7.3	100	44	0.435838	GAA	21.9	UTR	Chr5	16630726	16630747	0	AT5G41580	exon,five_prime_UTR,gene,mRNA	0	PIAL2	E4 SUMO-protein ligase PIAL2 [Source:UniProtKB/Swiss-Prot;Acc:F4JYG0]
25619	5.14065	3	91	9	0.333333	0.301471	UTR	0.73496	3	9	91	47	0.581349	TCT	27	UTR	Chr1	30082339	30082365	0	AT1G79970	gene,mRNA,mRNA,mRNA	0	N/A	N/A
414	5.26913	3	94	9	0.333333	0.301471	UTR	0.85138	3	13	94	71	1.04088	GAA	39	UTR	Chr1	641971	642008	0	AT1G08815	gene,transcript_region,exon	0	N/A	N/A
7966	5.41594	3	91	8	0.333333	0.207407	UTR	0.51465	3	8	91	43	0.399598	TGT	24	UTR	Chr1	11675274	11675298	0	AT1G32360	gene,mRNA,exon,three_prime_UTR	0	N/A	Zinc finger CCCH domain-containing protein 12 [Source:UniProtKB/Swiss-Prot;Acc:Q9LQM3]
82777	5.65429	2	92	13.5	0.5	0.385185	UTR	0.817578	2	13.5	92	47	1.02035	CT	27	UTR	Chr5	1445118	1445143	0	AT5G04930	gene,mRNA,five_prime_UTR,exon	1	ALA1	Phospholipid-transporting ATPase 1 [Source:UniProtKB/Swiss-Prot;Acc:P98204]
58651	5.6816	3	100	6	0.333333	0.397059	UTR	0.386131	3	10	100	60	0.870827	AGA	30	UTR	Chr3	15666247	15666276	0	AT3G43810	mRNA,mRNA,exon,five_prime_UTR,protein,protein,gene,mRNA	0	CAM7	Calmodulin-7 [Source:UniProtKB/Swiss-Prot;Acc:P59220]
83137	6.09915	3	100	7	0.333333	0.311111	UTR	0.363828	3	7	100	42	0.37134	AGA	21	UTR	Chr5	2046826	2046846	0	AT5G06660	gene,mRNA,five_prime_UTR,exon	1	N/A	N/A
2845	6.55816	2	100	7	0	0.22963	UTR	0.655919	2	11	100	44	0.954678	AT	22	UTR	Chr1	4692769	4692790	0	AT1G13680	gene,mRNA,exon,three_prime_UTR	0	N/A	N/A
45871	7.14802	2	100	23.5	0.5	0.467153	UTR	0.771246	2	25.5	100	102	0.812059	TC	51	UTR	Chr3	2132845	2132895	1	AT3G06760	gene,mRNA,five_prime_UTR,exon,mRNA,five_prime_UTR,exon,transposable_element,transposon_fragment	1	DI19-4	Protein DEHYDRATION-INDUCED 19 homolog 4 [Source:UniProtKB/Swiss-Prot;Acc:Q8VXU6]
64611	7.47098	2	100	26	0.5	0.431655	UTR	0.718025	2	31.5	100	126	0.96373	GA	63	UTR	Chr3	23031087	23031149	0	AT3G62220	gene,mRNA,mRNA,exon,five_prime_UTR,mRNA,exon,five_prime_UTR	1	N/A	N/A
77933	7.97001	3	100	8	0.333333	0.444444	UTR	0.865758	3	8	100	48	0.573207	TGA	24	UTR	Chr4	12336368	12336391	0	AT4G23680	three_prime_UTR,exon,gene,mRNA	0	N/A	N/A
80386	8.72294	3	100	7.5	0.333333	0.311111	UTR	0.662965	3	7	100	42	0.37134	TGT	21	UTR	Chr4	16422179	16422199	0	AT4G34320	gene,mRNA,mRNA,five_prime_UTR,exon	0	N/A	UPF0496 protein At4g34320 [Source:UniProtKB/Swiss-Prot;Acc:Q9SYZ7]
81607	9.03796	3	100	6	0.333333	0.318519	UTR	0.633746	3	7	100	42	0.37134	AGA	21	UTR	Chr4	18243655	18243675	0	AT4G39170	gene,mRNA,exon,three_prime_UTR,mRNA,exon,three_prime_UTR	0	SFH6	Phosphatidylinositol/phosphatidylcholine transfer protein SFH6 [Source:UniProtKB/Swiss-Prot;Acc:F4JVA6]
87626	9.50883	3	100	7	0.333333	0.37037	UTR	0.581016	3	9	100	54	0.738874	GAA	27	UTR	Chr5	8547605	8547631	1	AT5G24870	gene,mRNA,exon,five_prime_UTR,mRNA,exon,five_prime_UTR,transposable_element,transposon_fragment	1	N/A	N/A

## Sheet: int_purifying_strs
ID	Z-score	Unit.Size	Purity	N_units	Unit_GC	scan_gc	annotation[names(allzs),	Log(SD)	ID	Unit.Size	X..of.Units	Purity	TRF.score	VARscore	Consensus	Size.of.Locus	annotation	sanna.s.annotations	chr	start	stop	transposon	gene	all_annotation	DHS	gene	name	description
103582	-3.94248	2	100	10.5	0.5	0.404412	intron	0.0323186	103582	2	10.5	100	42	0.908802	TG	21	intron		Chr5	24511813	24511833	0	AT5G60920	gene,mRNA,mRNA,protein,protein	1	AT5G60920	COB	Protein COBRA [Source:UniProtKB/Swiss-Prot;Acc:Q94KT8]
1914	-3.52928	2	100	11.5	0.5	0.377778	intron	0.117638	1914	2	10.5	100	42	0.908802	AC	21	intron		Chr1	3299755	3299775	0	AT1G10095	gene,mRNA,mRNA,mRNA,mRNA,protein,protein,protein,protein	0	AT1G10095	N/A	N/A
21937	-4.4077	2	100	8.5	0	0.207407	intron	0.202022	21937	2	19.5	100	78	0.989118	AT	39	intron		Chr1	24764420	24764458	0	AT1G66390	gene,mRNA,protein	0	AT1G66390	MYB90	Transcription factor MYB90 [Source:UniProtKB/Swiss-Prot;Acc:Q9ZTC3]
22421	-5.10155	2	90	12	0.5	0.311111	intron	-0.30103	22421	2	12	90	41	0.895204	TG	24	intron		Chr1	25386618	25386641	0	AT1G67720	gene,mRNA,protein	0	AT1G67720	N/A	Probable LRR receptor-like serine/threonine-protein kinase At1g67720 [Source:UniProtKB/Swiss-Prot;Acc:C0LGI2]
25572	-4.8629	3	92	9.3	0.333333	0.294118	intron	-0.30103	25572	3	9.3	92	49	0.646654	TCT	27.9	intron		Chr1	30016147	30016174	0	AT1G79780	gene,mRNA,protein	0	AT1G79780	N/A	CASP-like protein 3A2 [Source:UniProtKB/Swiss-Prot;Acc:Q1PFB8]
25797	-5.03376	2	100	8.5	0	0.2	intron	0.170268	25797	2	14.5	100	58	1.1022	AT	29	intron		Chr1	30384287	30384315	1	AT1G80840	gene,mRNA,protein,transposable_element,transposon_fragment	0	AT1G80840	WRKY40	Probable WRKY transcription factor 40 [Source:UniProtKB/Swiss-Prot;Acc:Q9SAH7]
3809	-3.93144	2	100	11	0.5	0.392593	intron	0.0591228	3809	2	11	100	44	0.954678	AC	22	intron		Chr1	6287158	6287179	0	AT1G18270	gene,mRNA,mRNA,mRNA,mRNA,protein,protein,protein,protein	0	AT1G18270	N/A	N/A
44841	-5.99199	3	91	8	0.333333	0.426471	intron	-0.30103	44841	3	8	91	43	0.399598	AAG	24	intron		Chr3	317170	317194	0	AT3G01910	gene,mRNA,mRNA,protein	1	AT3G01910	SOX	Sulfite oxidase [Source:UniProtKB/Swiss-Prot;Acc:Q9S850]
45473	-5.5483	2	100	10	0.5	0.340741	intron	-0.0802941	45473	2	10	100	40	0.855577	CT	20	intron		Chr3	1448791	1448810	0	AT3G05155	gene,mRNA,mRNA,protein,protein	0	AT3G05155	N/A	Sugar transporter ERD6-like 9 [Source:UniProtKB/Swiss-Prot;Acc:Q7XA64]
48115	-3.46405	2	91	13	0	0.294118	intron	0.0131737	48115	2	13	91	45	0.982079	AT	26	intron		Chr3	5876189	5876214	0	AT3G17205	gene,mRNA,mRNA,mRNA,protein,protein,protein	0	AT3G17205	UPL6	E3 ubiquitin-protein ligase UPL6 [Source:UniProtKB/Swiss-Prot;Acc:Q8RWB8]
48253	-5.47305	2	100	9.5	0.5	0.357664	intron	-0.0146562	48253	2	11.5	100	46	0.993576	TG	23	intron		Chr3	6148480	6148502	0	AT3G17970	gene,mRNA,mRNA,protein,protein	0	AT3G17970	OEP64	Outer envelope protein 64, chloroplastic [Source:UniProtKB/Swiss-Prot;Acc:Q9LVH5]
48568	-3.99114	3	100	6.7	0.333333	0.382353	intron	-0.30103	48568	3	6.7	100	40	0.303382	TTC	20.1	intron		Chr3	6640106	6640125	0	AT3G19190	gene,mRNA,mRNA,mRNA,protein,protein,protein	0	AT3G19190	ATG2	Autophagy-related protein 2 [Source:UniProtKB/Swiss-Prot;Acc:F8S296]
49999	-4.27745	2	100	8	0	0.308824	intron	0.146527	49999	2	10	100	40	0.855577	TA	20	intron		Chr3	8581846	8581865	0	AT3G23800	gene,mRNA,protein	0	AT3G23800	SBP3	Selenium-binding protein 3 [Source:UniProtKB/Swiss-Prot;Acc:Q9LK38]
50060	-3.58762	2	100	10	0.5	0.362963	intron	0.0853376	50060	2	12	100	48	1.02588	CA	24	intron		Chr3	8638384	8638407	0	AT3G23910	gene,mRNA,mRNA,protein,protein	0	AT3G23910	N/A	N/A
50081	-4.34195	3	90	8	0.333333	0.330882	intron	-0.30103	50081	3	8	90	41	0.379879	GAT	24	intron		Chr3	8667356	8667379	0	AT3G23980	gene,mRNA,protein	0	AT3G23980	N/A	N/A
78024	-4.61169	4	95	6.5	0.25	0.325926	intron	-0.30103	78024	4	6.5	95	45	0.156877	TTGA	26	intron		Chr4	12480385	12480410	0	AT4G24020	gene,mRNA,mRNA,protein	0	AT4G24020	NLP7	Protein NLP7 [Source:UniProtKB/Swiss-Prot;Acc:Q84TH9]
84315	-4.98779	3	100	7	0.333333	0.338235	intron	-0.30103	84315	3	7	100	42	0.37134	TTG	21	intron		Chr5	3800524	3800544	0	AT5G11790	gene,mRNA,mRNA,protein	1	AT5G11790	N/A	N/A
86352	-3.93812	2	100	11	0	0.17037	intron	0.213192	86352	2	16	100	64	1.09435	AT	32	intron		Chr5	6949900	6949931	0	AT5G20540	gene,mRNA,protein	1	AT5G20540	BRXL4	Protein Brevis radix-like 4 [Source:UniProtKB/Swiss-Prot;Acc:Q8GZ92]
87547	-6.25472	2	100	9	0	0.26087	intron	0.142386	87547	2	23	100	92	0.861734	AT	46	intron		Chr5	8433617	8433662	0	AT5G24630	gene,mRNA,mRNA,mRNA,mRNA,mRNA,mRNA,mRNA,mRNA,mRNA,mRNA,mRNA,mRNA,protein,protein,protein,protein,protein,protein,protein,protein,protein,protein,protein,protein	0	AT5G24630	BIN4	DNA-binding protein BIN4 [Source:UniProtKB/Swiss-Prot;Acc:Q9FLU1]
99545	-3.60694	2	100	10	0.5	0.382353	intron	0.0810468	99545	2	10	100	40	0.855577	TG	20	intron		Chr5	18925278	18925297	0	AT5G46640	gene,mRNA,protein	0	AT5G46640	AHL8	AT-hook motif nuclear-localized protein 8 [Source:UniProtKB/Swiss-Prot;Acc:Q9FIR1]

## Sheet: intr_div_strs
ID	Z-score	Unit.Size	Purity	N_Units	GC	scan_gc	annotation	Log(SD)	Unit.Size	X..of.Units	Purity	TRF.score	VARscore	Consensus	Size.of.Locus	annotation	chr	start	stop	transposon	gene	all_annotation	DHS	name	description
100158	4.80427	2	100	5.5	0	0.169118	intron	0.530662	2	11.5	100	46	0.993576	TA	23	intron	Chr5	19686289	19686311	0	AT5G48560	gene,mRNA,mRNA,protein,protein	1	BHLH78	Transcription factor bHLH78 [Source:UniProtKB/Swiss-Prot;Acc:Q9FJL4]
15383	5.30673	3	100	19.8	0.333333	0.355556	intron	0.994672	3	14.3	100	86	1.12285	TTG	42.9	intron	Chr1	17118587	17118629	0	AT1G45191	gene,mRNA,mRNA,mRNA,mRNA,mRNA,mRNA,protein,protein,protein,protein	0	BGLU1	Beta-glucosidase 1 [Source:UniProtKB/Swiss-Prot;Acc:Q3ECW8]
16815	4.01572	2	100	7.5	0	0.220588	intron	0.565662	2	11.5	100	46	0.993576	AT	23	intron	Chr1	18577304	18577326	0	AT1G50140	gene,mRNA,mRNA,mRNA,mRNA,mRNA,protein,protein,protein,protein,protein	0	N/A	N/A
20170	3.93155	2	100	5	0	0.304348	intron	0.512047	2	11	100	44	0.954678	AT	22	intron	Chr1	22469114	22469135	0	AT1G60995	gene,mRNA,protein	0	N/A	N/A
23825	4.19258	2	93	21	0.5	0.437037	intron	0.708505	2	17	93	61	1.07967	CT	34	intron	Chr1	27353283	27353316	0	AT1G72650	gene,mRNA,mRNA,protein,protein	0	N/A	N/A
25646	3.93576	2	100	6	0	0.259259	intron	0.437025	2	17	100	68	1.07348	TA	34	intron	Chr1	30134291	30134324	0	AT1G80100	gene,mRNA,mRNA,mRNA,protein,protein,protein	0	AHP6	Pseudo histidine-containing phosphotransfer protein 6 [Source:UniProtKB/Swiss-Prot;Acc:Q9SSC9]
299	5.17129	2	94	16	0	0.257353	intron	0.736569	2	19	94	69	1.03897	AT	38	intron	Chr1	505763	505800	0	AT1G02460	gene,mRNA,protein	1	N/A	N/A
36745	5.27299	2	92	21.5	0.5	0.408759	intron	0.749388	2	26.5	92	92	0.872266	GA	53	intron	Chr2	8740310	8740362	1	AT2G20280	gene,mRNA,protein,transposable_element,transposon_fragment	0	N/A	Zinc finger CCCH domain-containing protein 21 [Source:UniProtKB/Swiss-Prot;Acc:Q9SK74]
44040	3.70154	2	100	6	0	0.2	intron	0.421473	2	11	100	44	0.954678	TA	22	intron	Chr2	18600559	18600580	0	AT2G45110	gene,mRNA,protein	0	EXPB4	Expansin-B4 [Source:UniProtKB/Swiss-Prot;Acc:Q9SHD1]
44831	5.34946	3	100	6.7	0.333333	0.274074	intron	0.304614	3	6.7	100	40	0.303382	AAC	20.1	intron	Chr3	301682	301701	0	AT3G01850	gene,mRNA,mRNA,protein,protein	0	N/A	N/A
45122	3.69275	2	100	6.5	0	0.237037	intron	0.433216	2	12.5	100	50	1.05197	TA	25	intron	Chr3	843881	843905	0	AT3G03530	gene,mRNA,protein	0	NPC4	Non-specific phospholipase C4 [Source:UniProtKB/Swiss-Prot;Acc:Q9SRQ7]
52977	4.27439	3	100	6.7	0.333333	0.323529	intron	0.241255	3	6.7	100	40	0.303382	AAC	20.1	intron	Chr3	11264440	11264459	0	AT3G29350	gene,mRNA,protein	0	AHP2	Histidine-containing phosphotransfer protein 2 [Source:UniProtKB/Swiss-Prot;Acc:Q9ZNV8]
5792	4.529	2	92	8.5	0.5	0.407407	intron	0.612888	2	14.5	92	51	1.05688	AG	29	intron	Chr1	9023890	9023918	0	AT1G26100	gene,mRNA,protein	1	CYB561D	Probable transmembrane ascorbate ferrireductase 4 [Source:UniProtKB/Swiss-Prot;Acc:Q9C540]
58132	13.0426	2	100	28.5	0	0.212903	intron	1.00684	2	13.5	100	54	1.08711	TA	27	intron	Chr3	15224124	15224150	0	AT3G43270	gene,mRNA,protein	0	PME32	Probable pectinesterase/pectinesterase inhibitor 32 [Source:UniProtKB/Swiss-Prot;Acc:Q9LXK7]
61022	6.56862	2	95	24.5	0.5	0.42963	intron	0.72562	2	25.5	95	95	0.85203	GA	51	intron	Chr3	17678486	17678536	0	AT3G47910	gene,mRNA,mRNA,protein,protein	1	N/A	N/A
61673	3.89677	4	100	6.2	0.25	0.377778	intron	0.331596	4	6.2	100	50	0.191715	TCTT	24.8	intron	Chr3	18578451	18578475	0	AT3G50100	gene,mRNA,protein	0	SDN1	Small RNA degrading nuclease 1 [Source:UniProtKB/Swiss-Prot;Acc:A3KPE8]
6339	3.72513	3	100	7.3	0.333333	0.333333	intron	0.274719	3	8.3	100	50	0.6266	GAA	24.9	intron	Chr1	9774378	9774402	0	AT1G28040	protein,gene,mRNA	0	ATL20	RING-H2 finger protein ATL20 [Source:UniProtKB/Swiss-Prot;Acc:Q9C7E9]
6396	6.16727	3	100	7.3	0.333333	0.408759	intron	0.435485	3	7.3	100	44	0.435838	GAA	21.9	intron	Chr1	9851859	9851880	0	AT1G28200	gene,mRNA,mRNA,protein,protein	0	FIP1	GEM-like protein 1 [Source:UniProtKB/Swiss-Prot;Acc:Q9SE96]
7358	6.09738	3	91	8.7	0.333333	0.288889	intron	0.745882	3	8.7	91	45	0.530293	TTC	26.1	intron	Chr1	11087597	11087622	0	AT1G31070	gene,mRNA,mRNA,protein,protein	0	GLCNAC1PUT1	UDP-N-acetylglucosamine diphosphorylase 1 [Source:UniProtKB/Swiss-Prot;Acc:Q940S3]
76199	3.71947	2	100	6	0	0.266667	intron	0.420319	2	12	100	48	1.02588	AT	24	intron	Chr4	9985391	9985414	0	AT4G17990	gene,mRNA,mRNA,protein,protein	0	N/A	UPF0725 protein At4g17990 [Source:UniProtKB/Swiss-Prot;Acc:O49698]
76533	6.84335	2	92	13.5	0.5	0.37037	intron	0.9154	2	14.5	92	51	1.05688	TC	29	intron	Chr4	10417310	10417338	0	AT4G19020	gene,mRNA,mRNA,protein,protein	0	CMT2	DNA (cytosine-5)-methyltransferase CMT2 [Source:UniProtKB/Swiss-Prot;Acc:Q94F87]
8420	4.17267	3	100	5.7	0.333333	0.362963	intron	0.300075	3	7.7	100	46	0.516554	TGT	23.1	intron	Chr1	12030151	12030173	0	AT1G33170	gene,mRNA,protein	0	N/A	Probable methyltransferase PMT18 [Source:UniProtKB/Swiss-Prot;Acc:Q9C884]

## Sheet: nc_purifying_strs
ID	Z-score	Unit.Size	Purity	N_Units	Unit_GC	scan_gc	annotation[names(allzs),	Log(SD)	Unit.Size	X..of.Units	Purity	TRF.score	VARscore	Consensus	Size.of.Locus	annotation	chr	start	stop	transposon	gene	all_annotation	DHS
100450	-3.60732	2	100	10	0	0.177778	Intergenic	0.2273	2	23	100	92	0.861734	TA	46	Intergenic	Chr5	20020295	20020340	0	NA	NA	0
104702	-4.0547	3	100	6.7	0.333333	0.362963	Intergenic	-0.30103	3	6.7	100	40	0.303382	TCT	20.1	Intergenic	Chr5	26234727	26234746	0	NA	NA	1
20926	-4.08979	3	100	6.7	0.333333	0.352518	Intergenic	-0.30103	3	6.7	100	40	0.303382	ATG	20.1	Intergenic	Chr1	23443623	23443642	0	NA	NA	0
48418	-3.68826	2	100	9.5	0	0.258065	Intergenic	0.249187	2	15.5	100	62	1.10049	AT	31	Intergenic	Chr3	6427353	6427383	1	AT3TE27050	transposable_element,transposon_fragment	0
60862	-3.82679	3	100	8	0.333333	0.414815	Intergenic	-0.190376	3	8	100	48	0.573207	ATC	24	Intergenic	Chr3	17436296	17436319	1	AT3TE70635:transposon_fragment:3	transposon_fragment,transposable_element_gene,mRNA,exon,transposable_element	0
74060	-4.01033	2	100	12	0	0.207407	Intergenic	0.0807158	2	12	100	48	1.02588	TA	24	Intergenic	Chr4	7402013	7402036	0	NA	NA	1
92265	-3.95843	3	100	6.7	0.333333	0.392593	Intergenic	-0.30103	3	6.7	100	40	0.303382	CTT	20.1	Intergenic	Chr5	12386182	12386201	0	NA	pseudogene,pseudogenic_transcript,transposable_element,transposon_fragment	0
92533	-5.00653	2	100	10	0.5	0.416058	Intergenic	-0.0463728	2	10	100	40	0.855577	GT	20	Intergenic	Chr5	12589959	12589978	1	AT5G33320	gene,mRNA,transposable_element,protein	0
96460	-3.76785	3	91	9	0.333333	0.266667	Intergenic	-0.30103	3	9	91	47	0.581349	TGT	27	Intergenic	Chr5	15577557	15577583	1	AT5TE56320	transposable_element,transposon_fragment	0

## Sheet: nc_div_strs
ID	Z-score	Unit.Size	Purity	N_units	Unit	GC	scan_gc	Unit.Size	X..of.Units	Purity	TRF.score	VARscore	Consensus	Size.of.Locus	chr	start	stop	transposon	gene	all_annotation	DHS
103981	4.86007	3	100	8.3	0.333333	0.274074	0.690499	3	8.3	100	50	0.6266	ATG	24.9	Chr5	25146813	25146837	0	NA	NA	0
28047	3.83775	3	100	6.7	0.333333	0.434783	0.221967	3	6.7	100	40	0.303382	TCA	20.1	Chr2	1832516	1832535	1	AT2G05110	transposable_element_gene,mRNA,exon	0
40257	3.99781	3	100	8	0.333333	0.37037	0.509617	3	8	100	48	0.573207	CAA	24	Chr2	12821077	12821100	0	NA	NA	1
44948	4.45727	2	100	10	0	0.2	0.674427	2	11	100	44	0.954678	TA	22	Chr3	559819	559840	0	NA	NA	0
45985	4.30414	2	100	9	0.5	0.278571	0.680484	2	10	100	40	0.855577	TC	20	Chr3	2321443	2321462	0	NA	pseudogene,pseudogenic_transcript,pseudogenic_exon,pseudogenic_transcript,pseudogenic_exon,pseudogenic_transcript,pseudogenic_exon,pseudogenic_transcript,pseudogenic_exon	1
5270	6.85379	2	100	10.5	0	0.22963	0.79871	2	10.5	100	42	0.908802	TA	21	Chr1	8332568	8332588	0	NA	NA	1
63650	8.55397	3	100	7	0.333333	0.345588	0.516731	3	7	100	42	0.37134	GAT	21	Chr3	21499967	21499987	0	NA	NA	1
82896	6.41774	3	100	7	0.333333	0.286765	0.379813	3	9	100	54	0.738874	ACA	27	Chr5	1668960	1668986	0	NA	NA	1
96928	4.23351	3	91	9	0.333333	0.377778	0.629948	3	9	91	47	0.581349	CAT	27	Chr5	16009433	16009459	0	NA	pseudogene,pseudogenic_transcript,pseudogenic_exon	0
