# Supplementary material for: Massive variation of short tandem repeats with functional consequences across strains of Arabidopsis thaliana
Source: HighWire-hosted journal article supplement (doi:10.1101/gr.231753.117), 2018-07-03
Supplement: Supplemental_File_S4.zip [file 1001G_strain_maps.xlsx]

## Sheet: Sheet1
Ecotype ID	Name	CS Number	Country	Lat	Long	Collector	Sequenced by
88	CYR	CS76790	FRA	47.4	0.683333	Valerie Le Corre	Monsanto
108	LDV-18	CS77013	FRA	48.5167	-4.06667	Valerie Le Corre	Monsanto
139	LDV-46	CS77014	FRA	48.5167	-4.06667	Valerie Le Corre	Monsanto
159	MAR2-3	CS77070	FRA	47.35	3.93333	Valerie Le Corre	Monsanto
265	PYL-6	CS77198	FRA	44.65	-1.16667	Valerie Le Corre	Monsanto
350	TOU-A1-88	CS77382	FRA	46.6667	4.11667	Fabrice Roux	Monsanto
351	TOU-A1-89	CS77383	FRA	46.6667	4.11667	Fabrice Roux	Monsanto
403	Zdarec3	CS78873	CZE	49.3667	16.2667	Marie-Theres Hauser	Monsanto
410	Doubravnik7	CS76808	CZE	49.4211	16.3497	Marie-Theres Hauser	Monsanto
424	Draha2	CS76812	CZE	49.4112	16.2815	Marie-Theres Hauser	Monsanto
428	Borky1	CS76718	CZE	49.403	16.232	Marie-Theres Hauser	Monsanto
430	Gr-1	CS76496	AUT	47	15.5	Albert Kranz	Salk
470	BRR4	CS78943	USA	40.8313	-87.735	Diane Byers	MPI
476	BRR12	CS78944	USA	40.8313	-87.735	Diane Byers	MPI
484	BRR23	CS78945	USA	40.8313	-87.735	Diane Byers	MPI
504	BRR57	CS78946	USA	40.8313	-87.735	Diane Byers	MPI
506	BRR60	CS78947	USA	40.8313	-87.735	Diane Byers	MPI
531	BRR107	CS78948	USA	40.8313	-87.735	Diane Byers	MPI
544	LI-WP-039	CS78949	USA	40.9076	-73.2089	Oliver Bossdorf	MPI
546	LI-WP-041	CS78950	USA	40.9076	-73.2089	Oliver Bossdorf	MPI
628	LI-OF-061	CS78951	USA	40.7777	-72.9069	Oliver Bossdorf	MPI
630	LI-OF-065	CS77036	USA	40.7777	-72.9069	Oliver Bossdorf	Monsanto
680	LI-RR-096	CS78952	USA	40.9447	-72.8615	Oliver Bossdorf	MPI
681	LI-RR-097	CS78953	USA	40.9447	-72.8615	Oliver Bossdorf	MPI
685	LI-EF-011	CS78954	USA	40.9064	-73.1493	Oliver Bossdorf	MPI
687	LI-EF-018	CS78955	USA	40.9064	-73.1493	Oliver Bossdorf	MPI
728	LI-SET-019	CS78956	USA	40.9352	-73.114	Oliver Bossdorf	MPI
742	LI-SET-036	CS78957	USA	40.9352	-73.114	Oliver Bossdorf	MPI
763	Kar-1	CS76522	KGZ	42.3	74.3667	Olivier Loudet	Salk
765	Sus-1	CS76607	KGZ	42.1833	73.4	Olivier Loudet	Salk
766	Dja-1	CS76473	KGZ	42.5833	73.6333	Olivier Loudet	Salk
768	Zal-1	CS76634	KGZ	42.8	76.35	Olivier Loudet	Salk
772	Neo-6	CS76560	TJK	37.35	72.4667	Olivier Loudet	Salk
801	KYC-33	CS76992	USA	37.9169	-84.4639	Kathleen Donohue	Monsanto
853	MIA-1	CS78958	USA	41.7976	-86.6691	Kathleen Donohue	MPI
854	MIA-5	CS78959	USA	41.7976	-86.6691	Kathleen Donohue	MPI
867	MIC-20	CS78960	USA	41.8266	-86.4366	Kathleen Donohue	MPI
868	MIC-24	CS78961	USA	41.8266	-86.4366	Kathleen Donohue	MPI
870	MIC-31	CS77082	USA	41.8266	-86.4366	Kathleen Donohue	Monsanto
915	LIN S-5	CS77040	USA	41.8972	-71.4378	Kathleen Donohue	Monsanto
932	CHA-41	CS76765	USA	42.3634	-71.1445	Kathleen Donohue	Monsanto
991	Ale-Stenar-41-1	CS76651	SWE	55.3833	14.05	Jon Ågren	GMI
992	Ale-Stenar-44-4	CS76652	SWE	55.3833	14.05	Jon Ågren	GMI
997	Ale-Stenar-56-14	CS76653	SWE	55.3833	14.05	Jon Ågren	GMI
1002	Ale-Stenar-64-24	CS76654	SWE	55.3833	14.05	Jon Ågren	GMI
1006	Ale-Stenar-77-31	CS77636	SWE	55.3833	14.05	Jon Ågren	GMI
1061	Brösarp-11-135	CS76727	SWE	55.7167	14.1333	Jon Ågren	GMI
1062	Brösarp-15-138	CS76728	SWE	55.7167	14.1333	Jon Ågren	GMI
1063	Brösarp-21-140	CS76729	SWE	55.7167	14.1333	Jon Ågren	GMI
1066	Brösarp-34-145	CS76730	SWE	55.7167	14.1333	Jon Ågren	GMI
1070	Brösarp-45-153	CS77643	SWE	55.7167	14.1333	Jon Ågren	GMI
1158	Aledal-6-49	CS76656	SWE	56.7	16.5167	Jon Ågren	GMI
1166	Aledal-14-73	CS77651	SWE	56.7	16.5167	Jon Ågren	GMI
1254	Tos-82-387	CS77379	SWE	59.4333	17.0167	Jon Ågren	GMI
1257	Tos-95-393	CS77380	SWE	59.4333	17.0167	Jon Ågren	GMI
1313	Ängsö-59-422	CS77658	SWE	59.5667	16.8667	Jon Ågren	GMI
1317	Ängsö-74-430	CS76665	SWE	59.5667	16.8667	Jon Ågren	GMI
1552	Sku-30	CS77251	SWE	63.0833	18.3667	Jon Ågren	GMI
1612	Brn-10	CS78962	USA	41.9	-86.583	Diane Byers	MPI
1622	Brn-24	CS78963	USA	41.9	-86.583	Diane Byers	MPI
1651	DuckLkSP38	CS78964	USA	43.3431	-86.4045	Diane Byers	MPI
1652	DuckLkSP40	CS78965	USA	43.3431	-86.4045	Diane Byers	MPI
1676	Haz-2	CS78966	USA	41.879	-86.607	Diane Byers	MPI
1684	Haz-10	CS78967	USA	41.879	-86.607	Diane Byers	MPI
1739	KBS-Mac-68	CS78968	USA	42.405	-85.398	Diane Byers	MPI
1741	KBS-Mac-74	CS78969	USA	42.405	-85.398	Diane Byers	MPI
1756	Ker-4	CS78970	USA	42.184	-86.358	Diane Byers	MPI
1757	Ker-5	CS78971	USA	42.184	-86.358	Diane Byers	MPI
1793	L-R-5	CS78972	USA	41.847	-86.67	Diane Byers	MPI
1797	L-R-10	CS78973	USA	41.847	-86.67	Diane Byers	MPI
1819	Lak-12	CS78974	USA	41.8	-86.67	Diane Byers	MPI
1820	Lak-13	CS78975	USA	41.8	-86.67	Diane Byers	MPI
1829	Mdn-1	CS77077	USA	42.051	-86.509	Diane Byers	Monsanto
1834	Mdn-8	CS78976	USA	42.051	-86.509	Diane Byers	MPI
1835	Mdn-10	CS78977	USA	42.051	-86.509	Diane Byers	MPI
1851	MNF-Pot-10	CS78978	USA	43.595	-86.2657	Diane Byers	MPI
1852	MNF-Pot-15	CS78979	USA	43.595	-86.2657	Diane Byers	MPI
1853	MNF-Pot-21	CS77099	USA	43.595	-86.2657	Diane Byers	Monsanto
1872	MNF-Pot-75	CS77100	USA	43.595	-86.2657	Diane Byers	Monsanto
1890	MNF-Riv-21	CS77101	USA	43.5139	-86.1859	Diane Byers	Monsanto
1925	MNF-Che-2	CS77096	USA	43.5251	-86.1843	Diane Byers	Monsanto
1942	MNF-Che-47	CS78980	USA	43.5251	-86.1843	Diane Byers	MPI
1943	MNF-Che-49	CS78981	USA	43.5251	-86.1843	Diane Byers	MPI
1954	MNF-Jac-12	CS77097	USA	43.5187	-86.1739	Diane Byers	Monsanto
2016	MNF-Pin-39	CS77098	USA	43.5356	-86.1788	Diane Byers	Monsanto
2017	MNF-Pin-40	CS78982	USA	43.5356	-86.1788	Diane Byers	MPI
2031	Map-8	CS78983	USA	42.166	-86.412	Diane Byers	MPI
2053	Map-35	CS78984	USA	42.166	-86.412	Diane Byers	MPI
2057	Map-42	CS77732	USA	42.166	-86.412	Diane Byers	MPI
2081	MuskSP-68	CS78985	USA	43.2483	-86.3368	Diane Byers	MPI
2091	MuskSP-83	CS78986	USA	43.2483	-86.3368	Diane Byers	MPI
2106	MSGA-10	CS78987	USA	43.2749	-86.0891	Diane Byers	MPI
2108	MSGA-12	CS78988	USA	43.2749	-86.0891	Diane Byers	MPI
2141	MSGA-61	CS78989	USA	43.2749	-86.0891	Diane Byers	MPI
2159	Paw-13	CS78990	USA	42.148	-86.431	Diane Byers	MPI
2166	Paw-20	CS78991	USA	42.148	-86.431	Diane Byers	MPI
2171	Paw-26	CS77164	USA	42.148	-86.431	Diane Byers	Monsanto
2191	Pent-7	CS78992	USA	43.7623	-86.3929	Diane Byers	MPI
2202	Pent-23	CS77168	USA	43.7623	-86.3929	Diane Byers	Monsanto
2212	Pent-46	CS78993	USA	43.7623	-86.3929	Diane Byers	MPI
2239	Riv-25	CS78994	USA	42.184	-86.382	Diane Byers	MPI
2240	Riv-26	CS78995	USA	42.184	-86.382	Diane Byers	MPI
2276	SLSP-31	CS77254	USA	43.665	-86.496	Diane Byers	Monsanto
2278	SLSP-35	CS77255	USA	43.665	-86.496	Diane Byers	Monsanto
2285	SLSP-69	CS78996	USA	43.665	-86.496	Diane Byers	MPI
2286	SLSP-67	CS78997	USA	43.665	-86.496	Diane Byers	MPI
2317	Ste-40	CS77278	USA	42.03	-86.514	Diane Byers	Monsanto
2370	Yng-4	CS78998	USA	41.865	-86.646	Diane Byers	MPI
2412	Yng-53	CS78999	USA	41.865	-86.646	Diane Byers	MPI
4779	UKSW06-179	CS78808	UK	50.4	-4.9	Eric Holub	Monsanto
4807	UKSW06-207	CS78809	UK	50.4	-4.9	Eric Holub	Monsanto
4826	UKSW06-226	CS78810	UK	50.4	-4.9	Eric Holub	Monsanto
4840	UKSW06-240	CS79000	UK	50.4	-4.9	Eric Holub	MPI
4857	UKSW06-257	CS79001	UK	50.3	-4.9	Eric Holub	MPI
4884	UKSW06-285	CS78811	UK	50.3	-4.9	Eric Holub	Monsanto
4900	UKSW06-302	CS78812	UK	50.3	-4.8	Eric Holub	Monsanto
4939	UKSW06-341	CS79002	UK	50.4	-4.7	Eric Holub	MPI
4958	UKSW06-360	CS78814	UK	50.5	-4.5	Eric Holub	Monsanto
5023	UKSE06-118	CS78799	UK	51.3	0.5	Eric Holub	Monsanto
5104	UKSE06-252	CS78800	UK	51.3	0.5	Eric Holub	Monsanto
5151	UKSE06-325	CS78801	UK	52.2	-1.7	Eric Holub	Monsanto
5165	UKSE06-362	CS78802	UK	51.3	0.4	Eric Holub	Monsanto
5210	UKSE06-432	CS78803	UK	51.2	0.3	Eric Holub	Monsanto
5236	UKSE06-470	CS78804	UK	51.2	0.4	Eric Holub	Monsanto
5249	UKSE06-491	CS79003	UK	51.2	0.3	Eric Holub	MPI
5253	UKSE06-500	CS78805	UK	51.1	0.6	Eric Holub	Monsanto
5276	UKSE06-533	CS78806	UK	51.3	1.1	Eric Holub	Monsanto
5279	UKSE06-541	CS79004	UK	51.3	1.1	Eric Holub	MPI
5349	UKSE06-639	CS78807	UK	51.1	0.4	Eric Holub	Monsanto
5353	UKNW06-003	CS78792	UK	54.5	-3	Eric Holub	Monsanto
5395	UKNW06-102	CS79005	UK	54.4	-3	Eric Holub	MPI
5486	UKNW06-233	CS78794	UK	54.6	-3.3	Eric Holub	Monsanto
5577	UKNW06-403	CS78797	UK	54.7	-3.4	Eric Holub	Monsanto
5644	UKNW06-481	CS78798	UK	54.4	-2.9	Eric Holub	Monsanto
5651	UKNW06-488	CS79006	UK	54.4	-2.9	Eric Holub	MPI
5717	Bra-1	CS79007	UK	54.6	-3.2	Eric Holub	MPI
5718	UKID11	CS79008	UK	57	-3.4	Eric Holub	MPI
5720	Cal-2	CS78781	UK	53.3	-1.6	D. Ratcliffe	Monsanto
5726	Cnt-1	CS78782	UK	51.3	1.1	Eric Holub	Monsanto
5741	For-2	CS78783	UK	56.6	-4.1	D. Ratcliffe	Monsanto
5748	Kil-0	CS78784	UK	56	-4.4	D. Ratcliffe	Monsanto
5757	Mc-1	CS78785	UK	54.6	-2.3	D. Ratcliffe	Monsanto
5768	UKID63	CS78786	UK	54.1	-1.5	Eric Holub	Monsanto,MPI
5772	Set-1	CS78787	UK	54.1	-2.3	D. Ratcliffe	Monsanto
5776	UKID71	CS79009	UK	52.9	-1.3	Eric Holub	MPI
5779	UKID74	CS78789	UK	51	-3.1	Eric Holub	Monsanto
5784	Ty-1	CS78790	UK	56.4	-5.2	D. Ratcliffe	Monsanto
5798	UKID93	CS79010	UK	53.1	-3.3	Eric Holub	MPI
5800	UKID96	CS78791	UK	57.4	-5.5	Eric Holub	Monsanto
5811	UKID107	CS78778	UK	52.9	-3.1	Eric Holub	Monsanto
5822	UKID116	CS78780	UK	56.7333	-5.98333	Eric Holub	Monsanto
5830	App1-12	CS76667	SWE	56.3333	15.9667	Magnus Nordborg	GMI
5831	App1-14	CS76668	SWE	56.3333	15.9667	Magnus Nordborg	GMI
5832	App1-16	CS76669	SWE	56.3333	15.9667	Magnus Nordborg	GMI
5836	Boo2-3	CS77906	SWE	55.86	13.51	Magnus Nordborg	GMI
5837	Bor-1	CS76453	CZE	49.4013	16.2326	Jirina Relichov	Salk
5856	Dör-10	CS76806	SWE	63.0167	17.4914	Magnus Nordborg	GMI
5860	Dra-3	CS77913	SWE	62.6814	18.0165	Magnus Nordborg	GMI
5865	Dra1-4	CS76809	SWE	55.76	14.12	Magnus Nordborg	GMI
5867	Dra2-1	CS76810	SWE	55.76	14.12	Magnus Nordborg	GMI
5874	DraII-6	CS76814	CZE	49.4112	16.2815	Jirina Relichov	Monsanto
5890	DraIV 1-8	CS76817	CZE	49.4112	16.2815	Jirina Relichov	Monsanto
5893	DraIV 1-11	CS76816	CZE	49.4112	16.2815	Jirina Relichov	Monsanto
5907	DraIV 2-9	CS76818	CZE	49.4112	16.2815	Jirina Relichov	Monsanto
5921	DraIV 3-7	CS76819	CZE	49.4112	16.2815	Jirina Relichov	Monsanto
5950	DraIV 5-12	CS76820	CZE	49.4112	16.2815	Jirina Relichov	Monsanto
5984	DraIV 6-13	CS76822	CZE	49.4112	16.2815	Jirina Relichov	Monsanto
5993	DraIV 6-22	CS76823	CZE	49.4112	16.2815	Jirina Relichov	Monsanto
6008	Duk	CS76824	CZE	49.1	16.2	Jirina Relichov	Salk
6009	Eden-1	CS76826	SWE	62.877	18.177	Magnus Nordborg	GMI
6010	Eden-5	CS78000	SWE	62.877	18.177	Magnus Nordborg	GMI
6011	Eden-6	CS76828	SWE	62.877	18.177	Magnus Nordborg	GMI
6012	Eden-7	CS76829	SWE	62.877	18.177	Magnus Nordborg	GMI
6013	Eden-9	CS76830	SWE	62.877	18.177	Magnus Nordborg	GMI
6016	Eds-1	CS76834	SWE	62.9	18.4	Magnus Nordborg	GMI
6017	Eds-9	CS76835	SWE	62.9	18.4	Magnus Nordborg	GMI
6019	Fjä1-2	CS76860	SWE	56.06	14.29	Magnus Nordborg	GMI
6020	Fjä1-5	CS76861	SWE	56.06	14.29	Magnus Nordborg	GMI
6021	Fjä2-4	CS76862	SWE	56.06	14.29	Magnus Nordborg	GMI
6022	Fjä2-6	CS78009	SWE	56.06	14.29	Magnus Nordborg	GMI
6023	Fly2-1	CS76863	SWE	55.7509	13.3712	Magnus Nordborg	GMI
6024	Fly2-2	CS76864	SWE	55.7509	13.3712	Magnus Nordborg	GMI
6025	Gro-3	CS76889	SWE	62.6437	17.7339	Magnus Nordborg	GMI
6030	Grön-5	CS76893	SWE	62.806	18.1896	Magnus Nordborg	GMI
6034	Hov1-7	CS76932	SWE	56.1	13.74	Magnus Nordborg	GMI
6035	Hov1-10	CS76931	SWE	56.1	13.74	Magnus Nordborg	GMI
6036	Hov3-2	CS76934	SWE	56.1	13.74	Magnus Nordborg	GMI
6038	Hov3-5	CS76935	SWE	56.1	13.74	Magnus Nordborg	GMI
6039	Hovdala-2	CS76937	SWE	56.1	13.74	Torbjorn Sall	GMI
6040	Kni-1	CS76970	SWE	55.66	13.4	Magnus Nordborg	GMI
6041	Lis-3	CS77044	SWE	56.0328	14.775	Magnus Nordborg	GMI
6042	Lom1-1	CS77048	SWE	56.09	13.9	Magnus Nordborg	GMI
6043	Löv-1	CS77049	SWE	62.801	18.079	Magnus Nordborg	GMI
6046	Löv-5	CS77050	SWE	62.801	18.079	Magnus Nordborg	GMI
6064	Nyl-2	CS77136	SWE	62.9513	18.2763	Magnus Nordborg	GMI
6069	Nyl-7	CS77137	SWE	62.9513	18.2763	Magnus Nordborg	GMI
6070	Omn-1	CS77145	SWE	62.9308	18.3448	Magnus Nordborg	GMI
6071	Omn-5	CS77146	SWE	62.9308	18.3448	Magnus Nordborg	GMI
6073	ÖMö1-7	CS77147	SWE	56.1481	15.8155	Magnus Nordborg	GMI
6074	Ör-1	CS77150	SWE	56.4573	16.1308	Magnus Nordborg	GMI
6076	Rev-2	CS77215	SWE	55.6942	13.4504	Magnus Nordborg	GMI
6077	Rev-3	CS78030	SWE	55.6942	13.4504	Magnus Nordborg	GMI
6085	Sparta-1	CS77260	SWE	55.7097	13.2145	Magnus Nordborg	GMI
6086	Sr:3	CS77267	SWE	58.9	11.2	Ivo Cetl	GMI
6087	Stu-2	CS78033	SWE	56.4666	16.1284	Magnus Nordborg	GMI
6088	Stu1-1	CS77285	SWE	56.4666	16.1284	Magnus Nordborg	GMI
6090	T1000	CS77288	SWE	55.6525	13.2197	Mattias Jakobsson	GMI
6091	T1010	CS78035	SWE	55.6525	13.215	Mattias Jakobsson	GMI
6092	T1020	CS77289	SWE	55.6514	13.2233	Mattias Jakobsson	GMI
6094	T1040	CS77290	SWE	55.6494	13.2147	Mattias Jakobsson	GMI
6095	T1050	CS78039	SWE	55.6486	13.2161	Mattias Jakobsson	GMI
6096	T1060	CS78040	SWE	55.6472	13.2225	Mattias Jakobsson	GMI
6097	T1070	CS77291	SWE	55.6481	13.2264	Mattias Jakobsson	GMI
6098	T1080	CS77292	SWE	55.6561	13.2178	Mattias Jakobsson	GMI
6099	T1090	CS77293	SWE	55.6575	13.2386	Mattias Jakobsson	GMI
6100	T1110	CS77294	SWE	55.6	13.2	Mattias Jakobsson	GMI
6101	T1120	CS78045	SWE	55.6	13.2	Mattias Jakobsson	GMI
6102	T1130	CS77295	SWE	55.6	13.2	Mattias Jakobsson	GMI
6104	T1160	CS77296	SWE	55.7	13.2	Mattias Jakobsson	GMI
6105	T450	CS77297	SWE	55.7967	13.1211	Mattias Jakobsson	GMI
6106	T460	CS77298	SWE	55.7931	13.1186	Mattias Jakobsson	GMI
6107	T470	CS77299	SWE	55.7942	13.1222	Mattias Jakobsson	GMI
6108	T480	CS77300	SWE	55.7989	13.1206	Mattias Jakobsson	GMI
6109	T510	CS77301	SWE	55.7936	13.1233	Mattias Jakobsson	GMI
6111	T530	CS77302	SWE	55.7989	13.1219	Mattias Jakobsson	GMI
6112	T540	CS77303	SWE	55.7967	13.1044	Mattias Jakobsson	GMI
6113	T550	CS77304	SWE	55.8078	13.1028	Mattias Jakobsson	GMI
6114	T570	CS77305	SWE	55.8097	13.1342	Mattias Jakobsson	GMI
6115	T580	CS77306	SWE	55.8	13.1367	Mattias Jakobsson	GMI
6118	T610	CS77307	SWE	55.7	13.2	Mattias Jakobsson	GMI
6119	T620	CS78060	SWE	55.7	13.2	Mattias Jakobsson	GMI
6122	T670	CS77308	SWE	55.8364	13.3075	Mattias Jakobsson	GMI
6123	T680	CS78064	SWE	55.8369	13.3033	Mattias Jakobsson	GMI
6124	T690	CS77309	SWE	55.8378	13.3092	Mattias Jakobsson	GMI
6125	T710	CS77310	SWE	55.8403	13.3106	Mattias Jakobsson	GMI
6126	T720	CS77311	SWE	55.8411	13.3047	Mattias Jakobsson	GMI
6128	T740	CS77313	SWE	55.8397	13.2881	Mattias Jakobsson	GMI
6131	T780	CS77315	SWE	55.8369	13.3181	Mattias Jakobsson	GMI
6132	T790	CS77316	SWE	55.8386	13.3186	Mattias Jakobsson	GMI
6133	T800	CS77317	SWE	55.8364	13.2906	Mattias Jakobsson	GMI
6134	T810	CS77318	SWE	55.8383	13.2906	Mattias Jakobsson	GMI
6136	T840	CS77319	SWE	55.9336	13.5519	Mattias Jakobsson	GMI
6137	T850	CS77320	SWE	55.9419	13.5603	Mattias Jakobsson	GMI
6138	T860	CS77321	SWE	55.9403	13.5511	Mattias Jakobsson	GMI
6140	T880	CS77322	SWE	55.9392	13.5539	Mattias Jakobsson	GMI
6141	T890	CS78079	SWE	55.9414	13.5542	Mattias Jakobsson	GMI
6142	T900	CS77323	SWE	55.9428	13.5558	Mattias Jakobsson	GMI
6145	T930	CS77324	SWE	55.9497	13.5533	Mattias Jakobsson	GMI
6148	T960	CS77325	SWE	55.9319	13.5508	Mattias Jakobsson	GMI
6149	T970	CS77326	SWE	55.9281	13.5481	Mattias Jakobsson	GMI
6150	T980	CS77327	SWE	55.9261	13.5319	Mattias Jakobsson	GMI
6151	T990	CS77328	SWE	55.6528	13.2244	Mattias Jakobsson	GMI
6153	TAA 03	CS77329	SWE	62.6425	17.7422	Mattias Jakobsson	GMI
6154	TAA 04	CS77330	SWE	62.6422	17.7406	Mattias Jakobsson	GMI
6163	TAA 14	CS77331	SWE	62.6425	17.7356	Mattias Jakobsson	GMI
6166	TAA 17	CS77332	SWE	62.6425	17.7372	Mattias Jakobsson	GMI
6169	TÅD 01	CS77333	SWE	62.8714	18.3447	Mattias Jakobsson	GMI
6172	TÅD 04	CS77335	SWE	62.8717	18.3436	Mattias Jakobsson	GMI
6173	TÅD 05	CS77336	SWE	62.8717	18.3419	Mattias Jakobsson	GMI
6174	TÅD 06	CS77337	SWE	62.8719	18.3422	Mattias Jakobsson	GMI
6177	TÄL 03	CS77338	SWE	62.6322	17.69	Mattias Jakobsson	GMI
6180	TÄL 07	CS77339	SWE	62.6322	17.6906	Mattias Jakobsson	GMI
6184	TBÖ 01	CS77343	SWE	62.8892	18.4522	Mattias Jakobsson	GMI
6188	TDr-1	CS77345	SWE	55.7683	14.1386	Mattias Jakobsson	GMI
6189	TDr-2	CS77351	SWE	55.7686	14.1383	Mattias Jakobsson	GMI
6191	TDr-4	CS77352	SWE	55.7689	14.1375	Mattias Jakobsson	GMI
6192	TDr-5	CS77353	SWE	55.7692	14.1369	Mattias Jakobsson	GMI
6193	TDr-7	CS77354	SWE	55.7694	14.1347	Mattias Jakobsson	GMI
6194	TDr-8	CS77355	SWE	55.7706	14.1342	Mattias Jakobsson	GMI
6195	TDr-9	CS77356	SWE	55.7708	14.1342	Mattias Jakobsson	GMI
6198	TDr-13	CS77347	SWE	55.7708	14.1331	Mattias Jakobsson	GMI
6201	TDr-16	CS77348	SWE	55.7719	14.1211	Mattias Jakobsson	GMI
6202	TDr-17	CS77349	SWE	55.7717	14.1206	Mattias Jakobsson	GMI
6203	TDr-18	CS77350	SWE	55.7714	14.1208	Mattias Jakobsson	GMI
6209	TEDEN 02	CS77358	SWE	62.8836	18.1842	Mattias Jakobsson	GMI
6210	TEDEN 03	CS77359	SWE	62.8839	18.1836	Mattias Jakobsson	GMI
6214	TFÄ 04	CS78121	SWE	63.0175	18.3281	Mattias Jakobsson	GMI
6216	TFÄ 06	CS77362	SWE	63.0167	18.3283	Mattias Jakobsson	GMI
6217	TFÄ 07	CS77363	SWE	63.0169	18.3283	Mattias Jakobsson	GMI
6218	TFÄ 08	CS77364	SWE	63.0172	18.3283	Mattias Jakobsson	GMI
6220	TGR 01	CS77365	SWE	62.806	18.1896	Mattias Jakobsson	GMI
6221	TGR 02	CS77366	SWE	62.806	18.1896	Mattias Jakobsson	GMI
6231	TNY 04	CS77368	SWE	62.96	18.2844	Mattias Jakobsson	GMI
6235	TOM 01	CS77372	SWE	62.9611	18.3589	Mattias Jakobsson	GMI
6237	TOM 03	CS77373	SWE	62.9619	18.35	Mattias Jakobsson	GMI
6238	TOM 04	CS77374	SWE	62.9619	18.35	Mattias Jakobsson	GMI
6240	TOM 06	CS77375	SWE	62.9622	18.35	Mattias Jakobsson	GMI
6241	TOM 07	CS77376	SWE	62.9614	18.3608	Mattias Jakobsson	GMI
6242	Tomegap-2	CS77377	SWE	55.7	13.2	Mattias Jakobsson	GMI
6243	Tottarp-2	CS77381	SWE	56.2737	13.9004	Magnus Nordborg	GMI
6244	TRÄ 01	CS77384	SWE	62.9169	18.4728	Mattias Jakobsson	GMI
6252	TV-4	CS78771	SWE	55.5796	14.3336	Mattias Jakobsson	GMI
6255	TV-7	CS78772	SWE	55.5796	14.334	Mattias Jakobsson	GMI
6258	TV-10	CS78767	SWE	55.5796	14.3336	Mattias Jakobsson	GMI
6268	TV-22	CS78768	SWE	55.5796	14.3336	Mattias Jakobsson	GMI
6276	TV-30	CS78769	SWE	55.5796	14.3336	Mattias Jakobsson	GMI
6284	TV-38	CS78770	SWE	55.5796	14.3336	Mattias Jakobsson	GMI
6296	UduI 1-11	CS78774	CZE	49.2771	16.6314	Jirina Relichov	Monsanto
6390	UduI 3-36	CS78775	CZE	49.2771	16.6314	Jirina Relichov	Monsanto
6396	UduI 4-9	CS78776	CZE	49.2771	16.6314	Jirina Relichov	Monsanto
6413	Ull3-4	CS78819	SWE	56.06	13.97	Magnus Nordborg	GMI
6424	ZdrI 1-23	CS78875	CZE	49.3853	16.2544	Jirina Relichov	Monsanto
6434	ZdrI 2-9	CS78877	CZE	49.3853	16.2544	Jirina Relichov	Monsanto
6445	ZdrI 2-21	CS78876	CZE	49.3853	16.2544	Jirina Relichov	Monsanto
6680	ANH-1	CS76437	GER	51.85	6.4333	Gerhard Röbbelen	Salk
6739	CSHL-15	CS79011	USA	40.8585	-73.4675	Catherine Weiss	MPI
6740	CSHL-17	CS79012	USA	40.8585	-73.4675	Catherine Weiss	MPI
6744	CSHL-5	CS76779	USA	40.8585	-73.4675	Catherine Weiss	Monsanto
6749	FM-10	CS79013	USA	42.4489	-76.5072	Michael Nachman	MPI
6750	FM-11	CS79014	USA	42.4489	-76.5072	Michael Nachman	MPI
6805	HS-12	CS79015	USA	42.373	-71.0627	Toby Kellogg	MPI
6806	HS-17	CS79016	USA	42.373	-71.0627	Toby Kellogg	MPI
6814	KNO-15	CS79017	USA	41.2816	-86.621	Joy Bergelson	MPI
6830	Kz-13	CS76994	KAZ	49.5	73.1	Ihsan Al-Shehbaz	MPI
6897	Ag-0	CS76430	FRA	45	1.3	Albert Kranz	Salk
6898	An-1	CS76435	BEL	51.2167	4.4	Albert Kranz	Salk
6900	Bil-5	CS76709	SWE	63.324	18.484	Magnus Nordborg	GMI
6901	Bil-7	CS76710	SWE	63.324	18.484	Magnus Nordborg	GMI
6903	Bor-4	CS76454	CZE	49.4013	16.2326	Jirina Relichov	Salk
6904	Br-0	CS76455	CZE	49.2	16.6166	Albert Kranz	Salk
6907	CIBC-17	CS76770	UK	51.4083	-0.6383	Mick Crawley	Salk
6908	CIBC-5	CS78894	UK	51.4083	-0.6383	Mick Crawley	Salk
6909	Col-0	CS76778	USA	38.3	-92.3	Albert Kranz	GMI
6911	Cvi-0	CS76789	CPV	15.1111	-23.6167	Albert Kranz	Salk
6913	Eden-2	CS76827	SWE	62.877	18.177	Magnus Nordborg	GMI
6915	Ei-2	CS76478	GER	50.3	6.3	Albert Kranz	Salk
6917	Fäb-2	CS76850	SWE	63.0165	18.3174	Magnus Nordborg	GMI
6918	Fäb-4	CS76851	SWE	63.0165	18.3174	Magnus Nordborg	GMI
6919	Ga-0	CS76490	GER	50.3	8	Albert Kranz	Salk
6920	Got-22	CS76884	GER	51.5338	9.9355	Gerhard Röbbelen	Salk
6922	Gu-0	CS76498	GER	50.3	8	Albert Kranz	Salk
6923	HR-10	CS76940	UK	51.4083	-0.6383	Mick Crawley	Salk
6924	HR-5	CS76514	UK	51.4083	-0.6383	Mick Crawley	Salk
6926	Kin-0	CS76527	USA	44.46	-85.37	Albert Kranz	Salk
6927	KNO-10	CS76973	USA	41.2816	-86.621	Joy Bergelson	Salk,MPI
6929	Kondara	CS76532	TJK	38.48	68.49	Igor Vizir	Salk
6931	Kz-9	CS76537	KAZ	49.5	73.1	Ihsan Al-Shehbaz	Salk
6932	Ler-1	CS77021	GER	47.984	10.8719	Eric Holub	MPI,GMI
6933	LL-0	CS77047	ESP	41.59	2.49	Albert Kranz	Salk
6938	Ms-0	CS76555	RUS	55.7522	37.6322	Albert Kranz	Salk
6940	Mz-0	CS76557	GER	50.3	8.3	Albert Kranz	Salk
6943	NFA-10	CS77126	UK	51.4083	-0.6383	Mick Crawley	Salk
6944	NFA-8	CS78913	UK	51.4083	-0.6383	Mick Crawley	Salk
6945	Nok-3	CS76562	NED	52.24	4.45	Albert Kranz	Salk
6951	Pu2-23	CS76579	CZE	49.42	16.36	Ivo Cetl	Salk
6956	Pu2-7	CS76580	CZE	49.42	16.36	Ivo Cetl	Salk
6957	Pu2-8	CS77192	CZE	49.42	16.36	Ivo Cetl	Salk
6958	Ra-0	CS76582	FRA	46	3.3	Albert Kranz	Salk
6959	Rennes-1	CS77210	FRA	48.5	-1.41	Gerhard Röbbelen	Salk
6960	Rennes-11	CS77211	FRA	48.5	-1.41	Gerhard Röbbelen	Salk
6961	Se-0	CS76597	ESP	38.3333	-3.53333	Albert Kranz	Salk
6963	Sorbo	CS78917	TJK	38.35	68.48	Igor Vizir	Salk
6966	Sq-1	CS77266	UK	51.4083	-0.6383	Mick Crawley	Salk
6967	Sq-8	CS76604	UK	51.4083	-0.6383	Mick Crawley	Salk
6968	Tamm-2	CS76610	FIN	60	23.5	Outi Savolainen	Salk,GMI
6969	Tamm-27	CS77341	FIN	60	23.5	Outi Savolainen	Salk
6970	Ts-1	CS76615	ESP	41.7194	2.93056	Albert Kranz	Salk
6971	Ts-5	CS77388	ESP	41.7194	2.93056	Albert Kranz	Salk
6973	Ull2-3	CS78817	SWE	56.0648	13.9707	Magnus Nordborg	GMI
6974	Ull2-5	CS78818	SWE	56.0648	13.9707	Magnus Nordborg	GMI
6975	Uod-1	CS76621	AUT	48.3	14.45	Marcus Koch	Salk
6976	Uod-7	CS78823	AUT	48.3	14.45	Marcus Koch	Salk
6979	Wei-0	CS76628	SUI	47.25	8.26	Alan Slusarenko	Salk
6981	Ws-2	CS78920	RUS	52.3	30	Kenneth Feldmann	MPI,Salk
6982	Wt-5	CS76632	GER	52.3	9.3	Albert Kranz	Salk
6984	Zdr-1	CS76635	CZE	49.3853	16.2544	Jirina Relichov	Salk
6986	Abd-0	CS76429	UK	57.1539	-2.2207	R. Mitchelson	Salk
6987	Ak-1	CS76431	GER	48.0683	7.62551	Albert Kranz	Salk
6989	Alst-1	CS76432	UK	54.8	-2.4333	Maarten Koornneef	Salk
6990	Amel-1	CS76434	NED	53.448	5.73	Maarten Koornneef	Salk
6992	Ang-0	CS76436	BEL	50.3	5.3	Albert Kranz	Salk
6997	Appt-1	CS76440	NED	51.8333	5.5833	Maarten Koornneef	Salk
7000	Aa-0	CS76428	GER	50.9167	9.57073	Albert Kranz	Salk
7002	Baa-1	CS76442	NED	51.3333	6.1	Maarten Koornneef	Salk
7003	Bs-1	CS78888	SUI	47.5	7.5	Albert Kranz	Salk
7008	Benk-1	CS76447	NED	52	5.675	Maarten Koornneef	Salk
7013	Bd-0	CS76445	GER	52.4584	13.287	Albert Kranz	Salk
7014	Ba-1	CS76441	UK	56.5459	-4.79821	Albert Kranz	Salk
7025	Bl-1	CS76450	ITA	44.5041	11.3396	Albert Kranz	Salk
7026	Boot-1	CS76452	UK	54.4	-3.2667	Maarten Koornneef	Salk
7028	Bch-1	CS76444	GER	49.5166	9.3166	Albert Kranz	Salk
7031	Bsch-0	CS76457	GER	50.0167	8.6667	Albert Kranz	Salk
7033	Buckhorn Pass	CS76733	USA	41.3599	-122.755	Angus Murphy	Salk,MPI
7036	Bu-0	CS78889	GER	50.5	9.5	Albert Kranz	MPI,Salk
7058	Bur-0	CS76734	IRL	54.1	-6.2	Albert Kranz	Mott
7061	Cal-0	CS76460	UK	53.2699	-1.64293	Albert Kranz	Salk
7062	Ca-0	CS76459	GER	50.2981	8.26607	Albert Kranz	Salk
7063	Can-0	CS76740	ESP	29.2144	-13.4811	Albert Kranz	Mott
7064	Cnt-1	CS76467	UK	51.3	1.1	Eric Holub	Salk
7067	Ct-1	CS76786	ITA	37.3	15	Albert Kranz	Mott
7068	Cerv-1	CS76462	ITA	42	12.1	Maarten Koornneef	Salk
7071	Chat-1	CS76463	FRA	48.0717	1.33867	Maarten Koornneef	Salk
7072	Chi-0	CS76464	RUS	53.7502	34.7361	Albert Kranz	Salk
7077	Co-1	CS76468	POR	40.12	-8.25	Albert Kranz	Salk
7081	Co	CS78895	POR	40.2077	-8.42639	George Redei	Salk
7092	Com-1	CS76469	FRA	49.416	2.823	Maarten Koornneef	Salk
7094	Da-0	CS76791	GER	49.8724	8.65081	Albert Kranz	Monsanto
7096	Di-G	CS76472	FRA	47.3239	5.04278	Maarten Koornneef	Salk
7102	Do-0	CS76474	GER	50.7224	8.2372	Albert Kranz	Salk
7103	Dra-0	CS76476	CZE	49.4167	16.2667	Albert Kranz	Salk
7106	Dr-0	CS78897	GER	51.051	13.7336	Albert Kranz	MPI,Salk
7107	Durh-1	CS76477	UK	54.7761	-1.5733	Maarten Koornneef	Salk
7109	Ema-1	CS76480	UK	51.3	0.5	Eric Holub	Salk
7111	Edi-0	CS76831	UK	55.9494	-3.16028	Albert Kranz	Mott
7117	El-0	CS76479	GER	51.5105	9.68253	Albert Kranz	Salk
7119	En-2	CS76481	GER	50	8.5	Albert Kranz	Salk
7120	En-D	CS76482	GER	50	8.5	Albert Kranz	Salk
7125	Er-0	CS78898	GER	49.5955	11.0087	Albert Kranz	MPI,Salk
7126	Es-0	CS76484	FIN	60.1997	24.5682	Albert Kranz	Salk
7127	Est	CS76485	EST	58.6656	24.9871	Brigitte Damm	Salk
7130	Et-0	CS76486	FRA	44.6447	2.56481	Albert Kranz	Salk
7133	Fr-2	CS76489	GER	50.1102	8.6822	Albert Kranz	Salk
7138	Fi-0	CS76488	GER	50.5	8.0167	Albert Kranz	Salk
7143	Gel-1	CS76492	NED	51.0167	5.86667	Maarten Koornneef	Salk
7147	Gie-0	CS76493	GER	50.584	8.67825	Albert Kranz	Salk
7158	Gr-5	CS76885	AUT	47	15.5	Albert Kranz	Monsanto
7160	Gre-0	CS76497	USA	43.178	-85.2532	Albert Kranz	Salk
7161	Gd-1	CS76491	GER	53.5	10.5	Albert Kranz	Salk
7162	Hs-0	CS76515	GER	52.24	9.44	Albert Kranz	Salk
7163	Ha-0	CS76500	GER	52.3721	9.73569	Albert Kranz	Salk
7164	Hau-0	CS76915	DEN	55.675	12.5686	Albert Kranz	Salk
7165	Hn-0	CS76513	GER	51.3472	8.28844	Albert Kranz	Salk
7169	Hh-0	CS76512	GER	54.4175	9.88682	Albert Kranz	Salk
7177	Jm-0	CS76520	CZE	49	15	Albert Kranz	Salk
7181	Je-0	CS76518	GER	50.927	11.587	Albert Kranz	Salk
7183	Kas-1	CS79018	IND	35	77	Shauna Somerville	Salk
7186	Kn-0	CS76969	LTU	54.8969	23.8924	Albert Kranz	Mott
7192	Kil-0	CS76526	UK	55.6395	-5.66364	Albert Kranz	Salk
7199	Kl-5	CS76528	GER	50.95	6.9666	Albert Kranz	Salk
7202	Kb-0	CS76524	GER	50.1797	8.50861	Albert Kranz	Salk
7203	Krot-0	CS76534	GER	49.631	11.5722	Thomas Mitchell-Olds	Salk
7207	Kyoto	CS76535	JPN	35.0085	135.752	Hirokazu Tsukaya	Salk
7208	Lan-0	CS76539	UK	55.6739	-3.78181	Albert Kranz	Salk
7209	La-0	CS76538	POL	52.7333	15.2333	Albert Kranz	Salk
7213	Ler-0	CS77020	GER	47.984	10.8719	Maarten Koornneef	Mott
7217	Lm-2	CS76545	FRA	48	0.5	Albert Kranz	Salk
7218	Le-0	CS76540	NED	52.1611	4.49015	Albert Kranz	Salk
7223	Li-2:1	CS76541	GER	50.3833	8.0666	Albert Kranz	Salk
7231	Li-7	CS77035	GER	50.3833	8.0666	Albert Kranz	Monsanto
7236	Litva	CS76543	LTU		NaN	Igor Vizir	Salk
7244	Mnz-0	CS76552	GER	50.001	8.26664	Albert Kranz	Salk
7248	Mv-0	CS76556	USA	41.3923	-70.6652	Albert Kranz	Salk
7250	Me-0	CS76549	GER	51.9183	10.1138	Albert Kranz	Salk
7255	Mh-0	CS76550	POL	50.95	20.5	Albert Kranz	Salk
7258	Nw-0	CS76564	GER	50.5	8.5	Albert Kranz	Salk
7268	Np-0	CS76563	GER	52.6969	10.981	Albert Kranz	Salk
7273	No-0	CS77128	GER	51.0581	13.2995	Albert Kranz	Mott
7276	Ob-0	CS76566	GER	50.2	8.5833	Albert Kranz	Salk
7280	Old-1	CS76567	GER	53.1667	8.2	Albert Kranz	Salk
7282	Or-0	CS76568	GER	50.3827	8.01161	Albert Kranz	Salk
7287	Ove-0	CS76569	GER	53.3422	8.42255	Albert Kranz	Salk
7288	Oy-0	CS77156	NOR	60.3855	6.19302	Albert Kranz	Mott
7296	Petergof	CS77170	RUS	59	29	Igor Vizir	Monsanto
7298	Pi-0	CS76572	AUT	47.04	10.51	Albert Kranz	Salk
7305	Pt-0	CS78915	GER	53.476	10.6065	Albert Kranz	Salk
7306	Pog-0	CS76576	CAN	49.2655	-123.206	Albert Kranz	Salk
7307	Pn-0	CS77182	FRA	48.0653	-2.96591	Albert Kranz	Monsanto
7314	Ragl-1	CS76583	UK	54.3512	-3.41697	Maarten Koornneef	Salk
7316	Rhen-1	CS78916	NED	51.9667	5.56667	Maarten Koornneef	Salk
7319	Rome-1	CS76590	ITA	42	12.1	Maarten Koornneef	Salk
7320	Rou-0	CS76591	FRA	49.4424	1.09849	Albert Kranz	Salk
7322	Rsch-4	CS77222	RUS	56.3	34	Albert Kranz	Mott
7323	Rubezhnoe-1	CS76594	UKR	49	38.28	Igor Vizir	Salk
7327	Sf-1	CS77246	ESP	41.7833	3.03333	F. Laibach	Salk
7328	Sf-2	CS77247	ESP	41.7833	3.03333	Albert Kranz	Mott
7332	Seattle-0	CS76598	USA	47	-122.2	Rick Amasino	Salk
7333	Sei-0	CS76599	ITA	46.5438	11.5614	Albert Kranz	Salk
7337	Si-0	CS76601	GER	50.8738	8.02341	Albert Kranz	Salk
7342	Su-0	CS76606	UK	53.6473	-3.00733	Albert Kranz	Salk
7343	Sp-0	CS76603	GER	52.5339	13.181	Albert Kranz	Salk
7344	Sg-1	CS76600	GER	47.6667	9.5	Albert Kranz	Salk
7346	Sten-0	CS77277	GER	52.6058	11.8558	Albert Kranz	Monsanto
7347	Stw-0	CS76605	RUS	52	36	Albert Kranz	Salk
7349	Ta-0	CS76608	CZE	49.5	14.5	Albert Kranz	Salk
7350	Tac-0	CS76609	USA	47.2413	-122.459	Thomas Mitchell-Olds	Salk
7353	Tha-1	CS76611	NED	52.08	4.3	Maarten Koornneef	Salk
7354	Ting-1	CS76612	SWE	56.5	14.9	Maarten Koornneef	Salk
7356	Tol-0	CS76614	USA	41.6639	-83.5553	Scott Leisner	Salk,MPI
7358	Tol-2	CS79019	USA	41.6639	-83.5553	Scott Leisner	MPI
7359	Tol-3	CS79020	USA	41.6639	-83.5553	Scott Leisner	MPI
7372	Tscha-1	CS76616	AUT	47.0748	9.9042	Maarten Koornneef	Salk
7373	Tsu-0	CS77389	JPN	34.43	136.31	Albert Kranz	Mott
7377	Tul-0	CS76618	USA	43.2708	-85.2563	Albert Kranz	Salk
7378	Uk-1	CS76620	GER	48.0333	7.7667	Albert Kranz	Salk
7382	Utrecht	CS76622	NED	52.0918	5.1145	Viola Willemsen	Salk
7383	Van-0	CS76623	CAN	49.2655	-123.206	Albert Kranz	Salk
7384	Ven-1	CS76624	NED	52.0333	5.55	Maarten Koornneef	Salk
7387	Vind-1	CS76625	UK	54.9902	-2.3671	Maarten Koornneef	Salk
7394	Wa-1	CS76626	POL	52.3	21	Albert Kranz	Salk
7396	Ws-0.2	CS78857	RUS	52.3	30	Albert Kranz	Mott
7404	Wc-1	CS76627	GER	52.6	10.0667	Albert Kranz	Salk
7411	Wl-0	CS76630	GER	47.9299	10.8134	Albert Kranz	Salk
7413	Wil-2	CS78856	LTU	54.6833	25.3167	Albert Kranz	Mott
7415	Wu-0	CS78858	GER	49.7878	9.9361	Albert Kranz	Mott
7416	Yo-0	CS76633	USA	37.45	-119.35	Albert Kranz	Salk
7417	Zu-0	CS78880	SUI	47.3667	8.55	Albert Kranz	Mott
7418	Zu-1	CS78881	SUI	47.3667	8.55	Albert Kranz	Monsanto
7419	Db-1	CS76471	GER	50.3058	8.32213	Albert Kranz	Salk
7424	Jl-3	CS76519	CZE	49.2	16.6166	Albert Kranz	Salk
7427	Ko-2	CS76531	DEN		NaN	Albert Kranz	Salk
7430	Nc-1	CS76559	FRA	48.6167	6.25	Albert Kranz	Salk
7460	Da(1)-12	CS76470	CZE		NaN	Igor Vizir	Salk
7461	H55	CS76897	CZE	49	15	Igor Vizir	Salk
7471	RLD-1	CS76588	UNK		NaN	Maarten Koornneef	Salk
7475	KEN	CS79021	USA	41.767	-72.677	Massimo Pigliucci	MPI
7477	WAR	CS78853	USA	41.7302	-71.2825	Massimo Pigliucci	Monsanto
7514	RRS-7	CS76593	USA	41.5609	-86.4251	Joy Bergelson	Salk
7515	RRS-10	CS76592	USA	41.5609	-86.4251	Joy Bergelson	MPI,Salk
7516	Vår2-1	CS78830	SWE	55.58	14.334	Magnus Nordborg	GMI
7517	Vår2-6	CS78831	SWE	55.58	14.334	Magnus Nordborg	GMI
7520	Lp2-2	CS76546	CZE	49.38	16.81	Ivo Cetl	Salk
7521	Lp2-6	CS77052	CZE	49.38	16.81	Ivo Cetl	Salk
7523	Pna-17	CS76575	USA	42.0945	-86.3253	Joy Bergelson	Salk
7525	Rmx-A180	CS77218	USA	42.036	-86.511	Joy Bergelson	Salk
7529	627RMX-1MN4	CS79022	USA	42.0333	-86.5128	Justin Borevitz	MPI
7530	627RMX-1MN5	CS79023	USA	42.0333	-86.5128	Justin Borevitz	MPI
7566	627ME-13Y1	CS78367	USA	42.093	-86.359	Justin Borevitz	MPI
7568	627ME-1MI1	CS79024	USA	42.093	-86.359	Justin Borevitz	MPI
7717	KNO1.37	CS76972	USA	41.273	-86.625	Megan Dunning	Monsanto
7757	KNO2.41	CS79025	USA	41.273	-86.625	Megan Dunning	MPI
7767	KNO2.54	CS79026	USA	41.273	-86.625	Megan Dunning	MPI
7917	PNA3.10	CS77183	USA	42.0945	-86.3253	Megan Dunning	Monsanto
7947	PNA3.40	CS77184	USA	42.0945	-86.3253	Megan Dunning	Monsanto
8037	PT1.52	CS79027	USA	41.3423	-86.7368	Megan Dunning	MPI
8057	PT1.85	CS79028	USA	41.3423	-86.7368	Megan Dunning	MPI
8077	PT2.21	CS77191	USA	41.3423	-86.7368	Megan Dunning	Monsanto
8132	RMX3.22	CS77219	USA	42.036	-86.511	Megan Dunning	Monsanto
8171	RMX4.118	CS79029	USA	42.036	-86.511	Megan Dunning	MPI
8214	Gy-0	CS78901	FRA	49	2	Albert Kranz	Salk
8222	Lis-2	CS77043	SWE	56.0328	14.775	Magnus Nordborg	GMI
8227	THÖ 03	CS77367	SWE	62.7989	17.9103	Mattias Jakobsson	GMI
8230	Algutsrum	CS76657	SWE	56.68	16.5	Magnus Nordborg	GMI
8231	Brö1-6	CS76726	SWE	56.3	16	Magnus Nordborg	GMI
8233	Dem-4	CS76794	USA	41.1876	-87.1923	Joy Bergelson	Salk
8234	Gul1-2	CS76896	SWE	56.4606	15.8127	Magnus Nordborg	GMI,Salk
8235	Hod	CS76924	CZE	48.8	17.1	Jirina Relichov	Salk
8236	HSm	CS76941	CZE	49.33	15.76	Jirina Relichov	Salk
8237	Kävlinge-1	CS76964	SWE	55.8	13.1	Torbjorn Sall	GMI
8238	Kent	CS76967	UK	51.15	0.4	Magnus Nordborg	Salk
8239	PHW-3	CS76976	GER	51	7	Paul Williams	Salk
8240	Kulturen-1	CS76987	SWE	55.705	13.196	Torbjorn Sall	GMI
8241	Liarum	CS77038	SWE	55.9473	13.821	Torbjorn Sall	GMI
8242	Lillö-1	CS77039	SWE	56.1494	15.7884	Magnus Nordborg	GMI
8243	PHW-2	CS77173	ITA	43.7703	11.2547	Paul Williams	Salk
8244	PHW-34	CS77174	FRA	48.6103	2.3086	Paul Williams	Salk
8246	NC-6	CS77124	USA	35	-79.18	Joy Bergelson	Salk
8247	San-2	CS77233	SWE	56.07	13.74	Magnus Nordborg	GMI
8249	Vimmerby	CS78845	SWE	57.7	15.8	Magnus Nordborg	GMI
8256	Bå1-2	CS76676	SWE	56.4	12.9	Magnus Nordborg	GMI
8258	Bå4-1	CS76677	SWE	56.4	12.9	Magnus Nordborg	GMI
8259	Bå5-1	CS76678	SWE	56.4	12.9	Magnus Nordborg	GMI
8264	Bla-1	CS76451	ESP	41.6833	2.8	Albert Kranz	Salk
8283	Dra3-1	CS76811	SWE	55.76	14.12	Magnus Nordborg	GMI
8284	DraII-1	CS76813	CZE	49.4112	16.2815	Jirina Relichov	Salk
8285	DraIII-1	CS76815	CZE	49.4112	16.2815	Jirina Relichov	Salk
8290	En-1	CS76841	GER	50	8.5	Albert Kranz	Salk
8297	Ge-0	CS76875	SUI	46.5	6.08	Albert Kranz	Salk
8306	Hov4-1	CS76936	SWE	56.1	13.74	Magnus Nordborg	GMI
8307	Hovdala-6	CS76938	SWE	56.1	13.74	Torbjorn Sall	GMI
8311	In-0	CS78903	AUT	47.5	11.5	Albert Kranz	Salk
8312	Is-0	CS78904	GER	50.5	7.5	Albert Kranz	MPI,Salk
8326	Lis-1	CS77042	SWE	56.0328	14.775	Magnus Nordborg	GMI
8334	Lu-1	CS77056	SWE	55.71	13.2	Albert Kranz	GMI
8335	Lund	CS77060	SWE	55.71	13.2	Magnus Nordborg	GMI
8337	Mir-0	CS76551	ITA	44	12.37	Albert Kranz	Salk
8343	Na-1	CS76558	FRA	47.5	1.5	Albert Kranz	Salk
8351	Ost-0	CS77154	SWE	60.25	18.37	Albert Kranz	GMI
8354	Per-1	CS76571	RUS	58	56.3167	Albert Kranz	Salk
8357	Pla-0	CS76573	ESP	41.5	2.25	Albert Kranz	Salk
8365	Rak-2	CS77201	CZE	49	16	Albert Kranz	Salk
8366	Rd-0	CS76584	GER	50.5	8.5	Albert Kranz	Salk
8369	Rev-1	CS77214	SWE	55.6942	13.4504	Magnus Nordborg	GMI
8376	Sanna-2	CS77234	SWE	62.69	18	Magnus Nordborg	GMI
8386	Sr:5	CS77268	SWE	58.9	11.2	Ivo Cetl	GMI
8387	St-0	CS77270	SWE	59	18	Albert Kranz	GMI
8419	Wil-1	CS78855	LTU	54.6833	25.3167	Albert Kranz	Salk
8420	Kelsterbach-4	CS76525	GER	50.0667	8.5333	Paul Williams	Salk
8422	Fjä1-1	CS76859	SWE	56.06	14.29	Magnus Nordborg	GMI
8424	Kas-2	CS78905	IND	35	77	Shauna Somerville	Salk
8426	Ull1-1	CS78816	SWE	56.06	13.97	Magnus Nordborg	GMI
8427	Ull2-13	CS78552	SWE	56.0648	13.9707	Magnus Nordborg	GMI
8464	LP3413.31	CS79030	USA	41.6862	-86.8513	Justin Borevitz	MPI
8483	LP3413.53	CS79031	USA	41.6862	-86.8513	Justin Borevitz	MPI
8699	328PNA062	CS79032	USA	42.0945	-86.3253	Justin Borevitz	MPI
8723	11PNA1.14	CS79033	USA	42.0945	-86.3253	Justin Borevitz	MPI
9027	RMX413.85	CS79034	USA	42.036	-86.511	Justin Borevitz	MPI
9057	Vinslöv	CS78847	SWE	56.1	13.9167	Torbjorn Sall	GMI
9058	Västervik	CS78834	SWE	57.75	16.6333	Magnus Nordborg	GMI
9067	Xan-3	CS78860	AZE	38.6536	48.7992	James Beck	Monsanto
9069	Xan-5	CS78861	AZE	38.6536	48.7992	James Beck	Monsanto
9070	Xan-6	CS78862	AZE	38.6536	48.7992	James Beck	Monsanto
9075	Lerik1-4	CS77023	AZE	38.7406	48.6131	James Beck	Monsanto
9078	Lerik1-7	CS77024	AZE	38.7406	48.6131	James Beck	Monsanto
9079	Lerik2-1	CS77025	AZE	38.7833	48.5517	James Beck	Monsanto
9081	Lerik2-3	CS77026	AZE	38.7833	48.5517	James Beck	Monsanto
9084	Lerik2-6	CS77028	AZE	38.7833	48.5517	James Beck	Monsanto
9085	Lerik2-7	CS77029	AZE	38.7833	48.5517	James Beck	Monsanto
9089	Nar-3	CS77119	AZE	38.9522	48.925	James Beck	Monsanto
9091	Nar-5	CS77121	AZE	38.9522	48.925	James Beck	Monsanto
9095	Istisu-5	CS76950	AZE	38.9786	48.5594	James Beck	Monsanto
9099	Istisu-9	CS76953	AZE	38.9786	48.5594	James Beck	Monsanto
9100	Lag1-2	CS76998	GEO	41.8296	46.2831	James Beck	Monsanto
9102	Lag1-4	CS76999	GEO	41.8296	46.2831	James Beck	Monsanto
9103	Lag1-5	CS77000	GEO	41.8296	46.2831	James Beck	Monsanto
9104	Lag1-6	CS77001	GEO	41.8296	46.2831	James Beck	Monsanto
9105	Lag1-7	CS77002	GEO	41.8296	46.2831	James Beck	Monsanto
9106	Lag1-8	CS77003	GEO	41.8296	46.2831	James Beck	Monsanto
9111	Lag2-4	CS77005	GEO	41.8296	46.2831	James Beck	Monsanto
9113	Lag2-6	CS77006	GEO	41.8296	46.2831	James Beck	Monsanto
9114	Lag2-7	CS77007	GEO	41.8296	46.2831	James Beck	Monsanto
9115	Lag2-10	CS77004	GEO	41.8296	46.2831	James Beck	Monsanto
9121	Bak-5	CS76685	GEO	41.7942	43.4767	James Beck	Monsanto
9125	Geg-14	CS76876	ARM	40.1408	44.8203	James Beck	Monsanto
9128	Yeg-2	CS78864	ARM	39.8692	45.3622	James Beck	Monsanto
9130	Yeg-4	CS78865	ARM	39.8692	45.3622	James Beck	Monsanto
9131	Yeg-5	CS78866	ARM	39.8692	45.3622	James Beck	Monsanto
9133	Yeg-7	CS78867	ARM	39.8692	45.3622	James Beck	Monsanto
9134	Yeg-8	CS78868	ARM	39.8692	45.3622	James Beck	Monsanto
9298	Edi-1	CS76832	UK	55.9681	-3.21833	James Beck	Monsanto
9312	Ullapool-8	CS78821	UK	57.9	-5.1525	James Beck	Monsanto
9314	Gol-2	CS76883	UK	57.9672	-3.96722	James Beck	Monsanto
9321	Ådal 1	CS76643	SWE	62.8622	18.336	Alison Anastasio	GMI
9323	Ådal 3	CS76644	SWE	62.8622	18.336	Alison Anastasio	GMI
9332	Bar 1	CS76688	SWE	62.8698	18.381	Alison Anastasio	GMI
9336	Bön 1	CS76715	SWE	62.8794	18.4473	Alison Anastasio	GMI
9339	Böt 1	CS76720	SWE	57.7133	15.0689	Alison Anastasio	GMI
9343	Dju-1	CS78896	SWE	57.3089	18.1512	Alison Anastasio	GMI
9352	Död 2	CS76797	SWE	57.2608	16.3675	Alison Anastasio	GMI
9353	Död 3	CS76798	SWE	57.2608	16.3675	Alison Anastasio	GMI
9363	EdJ 2	CS76833	SWE	62.9147	18.4045	Alison Anastasio	GMI
9369	EkS 2	CS76837	SWE	57.6781	14.9986	Alison Anastasio	GMI
9370	EkS 3	CS79035	SWE	57.6781	14.9986	Alison Anastasio	GMI
9371	FäL 1	CS76852	SWE	63.016	18.3175	Alison Anastasio	GMI
9380	FlyA 3	CS76865	SWE	55.7488	13.3742	Alison Anastasio	GMI
9381	Fri 1	CS76868	SWE	55.8106	14.2091	Alison Anastasio	GMI
9382	Fri 2	CS76869	SWE	55.8106	14.2091	Alison Anastasio	GMI
9383	Fri 3	CS76870	SWE	55.8106	14.2091	Alison Anastasio	GMI
9386	Grön 12	CS76891	SWE	62.806	18.1896	Alison Anastasio	GMI
9388	Grön 14	CS76892	SWE	62.806	18.1896	Alison Anastasio	GMI
9390	Hadd-1	CS78659	SWE	57.3263	15.8979	Alison Anastasio	GMI
9391	Hadd-2	CS76905	SWE	57.3263	15.8979	Alison Anastasio	GMI
9392	Hadd-3	CS76906	SWE	57.3263	15.8979	Alison Anastasio	GMI
9394	Hag-2	CS76907	SWE	56.5804	16.4063	Alison Anastasio	GMI
9395	Hal-1	CS76908	SWE	57.5089	15.0105	Alison Anastasio	GMI
9399	Hamm-1	CS76910	SWE	55.4234	13.9905	Alison Anastasio	GMI
9402	Hel-3	CS76918	SWE	57.8765	14.8549	Alison Anastasio	GMI
9404	HolA-1 1	CS76926	SWE	55.7491	13.399	Alison Anastasio	GMI
9405	HolA-1 2	CS76927	SWE	55.7491	13.399	Alison Anastasio	GMI
9407	HolA-2 2	CS76928	SWE	55.7491	13.399	Alison Anastasio	GMI
9408	Kal 1	CS76959	SWE	56.047	13.9519	Alison Anastasio	GMI
9409	Kia 1	CS76968	SWE	56.0573	14.302	Alison Anastasio	GMI
9412	Kor 3	CS76981	SWE	57.2746	16.1494	Alison Anastasio	GMI
9413	Kor 4	CS76982	SWE	57.2746	16.1494	Alison Anastasio	GMI
9416	Kru-3	CS76986	SWE	57.7215	18.3837	Alison Anastasio	GMI
9421	Lan 1	CS77009	SWE	55.9745	14.3997	Alison Anastasio	GMI
9427	Näs 2	CS77122	SWE	62.8815	18.4055	Alison Anastasio	GMI
9433	Nyl 13	CS77135	SWE	62.9513	18.2763	Alison Anastasio	GMI
9436	Puk-1	CS77194	SWE	56.1633	14.6806	Alison Anastasio	GMI
9437	Puk-2	CS77195	SWE	56.1633	14.6806	Alison Anastasio	GMI
9442	Sim-1	CS77250	SWE	55.5678	14.3398	Alison Anastasio	GMI
9450	Spro 1	CS77263	SWE	57.2545	18.2109	Alison Anastasio	GMI
9451	Spro 2	CS77264	SWE	57.2545	18.2109	Alison Anastasio	GMI
9452	Spro 3	CS77265	SWE	57.2545	18.2109	Alison Anastasio	GMI
9453	Stenk-2	CS77274	SWE	57.8009	18.5162	Alison Anastasio	GMI
9454	Stenk-3	CS77275	SWE	57.8009	18.5162	Alison Anastasio	GMI
9455	Stenk-4	CS77276	SWE	57.8009	18.5162	Alison Anastasio	GMI
9470	Tur-4	CS77399	SWE	57.6511	14.8043	Alison Anastasio	GMI
9471	Ull-A-1	CS78820	SWE	56.0648	13.9707	Alison Anastasio	GMI
9476	VårA 1	CS78832	SWE	55.5796	14.3336	Alison Anastasio	GMI
9481	Yst-1	CS78869	SWE	55.4242	13.8484	Alison Anastasio	GMI
9503	11C1	CS76640	UK	55.8877	-3.21072	Andrew Hudson	Monsanto
9506	IP-Alo-0	CS76662	POR	40.11	-7.47	Carlos Alonso-Blanco	Monsanto
9507	IP-Coa-0	CS76775	POR	38.45	-7.5	Carlos Alonso-Blanco	Monsanto
9508	IP-Mos-1	CS77108	POR	40.04	-7.11	Carlos Alonso-Blanco	Monsanto
9509	IP-Reg-0	CS77207	POR	39.29	-7.4	Carlos Alonso-Blanco	Monsanto
9510	IP-Rei-0	CS77208	POR	38.75	-7.59	Carlos Alonso-Blanco	Monsanto
9511	IP-Vav-0	CS78835	POR	38.53	-8.02	Carlos Alonso-Blanco	Monsanto
9512	IP-Vid-1	CS78842	POR	38.22	-7.84	Carlos Alonso-Blanco	Monsanto
9513	IP-Adc-5	CS76646	ESP	38.77	-4.07	Carlos Alonso-Blanco	Monsanto
9514	IP-Adm-0	CS76647	ESP	39.15	-4.54	Carlos Alonso-Blanco	Monsanto
9515	IP-Ala-0	CS76650	ESP	39.72	-6.89	Carlos Alonso-Blanco	Monsanto
9517	IP-All-0	CS76659	ESP	42.19	-7.8	Carlos Alonso-Blanco	Monsanto
9518	IP-Alm-0	CS76660	ESP	39.88	-0.36	Carlos Alonso-Blanco	Monsanto
9519	IP-Ang-0	CS78886	ESP	41.94	2.64	Xavier Picó	Monsanto
9520	IP-Ara-4	CS76670	ESP	41.7	-3.68	Carlos Alonso-Blanco	Monsanto
9521	IP-Bar-1	CS76689	ESP	41.43	2.13	Xavier Picó	Monsanto
9522	IP-Bea-0	CS76695	ESP	36.52	-5.27	Carlos Alonso-Blanco	Monsanto
9523	IP-Ben-0	CS76700	ESP	38.37	-2.66	Carlos Alonso-Blanco	Monsanto
9524	IP-Ber-0	CS78887	ESP	42.52	-0.56	Carlos Alonso-Blanco	Monsanto
9525	IP-Bis-0	CS76711	ESP	42.49	0.54	Xavier Picó	Monsanto
9526	IP-Cab-3	CS76738	ESP	41.54	2.39	Xavier Picó	Monsanto
9527	IP-Cad-0	CS76739	ESP	40.37	-5.74	Carlos Alonso-Blanco	Monsanto
9528	IP-Cal-0	CS78890	ESP	40.94	-1.37	Carlos Alonso-Blanco	Monsanto
9529	IP-Cap-1	CS76741	ESP	36.97	-3.36	Carlos Alonso-Blanco	Monsanto
9530	IP-Car-1	CS76742	ESP	38.25	-4.32	Carlos Alonso-Blanco	Monsanto
9531	IP-Cdc-3	CS76761	ESP	41.21	-4.54	Carlos Alonso-Blanco	Monsanto
9532	IP-Cdo-0	CS76762	ESP	42.23	-4.64	Carlos Alonso-Blanco	Monsanto
9533	IP-Cem-0	CS76763	ESP	41.15	-4.32	Carlos Alonso-Blanco	Monsanto
9534	IP-Cmo-3	CS76774	ESP	40.05	-4.65	Carlos Alonso-Blanco	Monsanto
9535	IP-Coc-1	CS76776	ESP	42.31	3.19	Xavier Picó	Monsanto
9536	IP-Cor-0	CS76782	ESP	40.83	-2	Carlos Alonso-Blanco	Monsanto
9537	IP-Cum-1	CS76787	ESP	38.07	-6.66	Carlos Alonso-Blanco	Monsanto
9539	IP-Deh-1	CS76793	ESP	40.29	-6.67	Carlos Alonso-Blanco	Monsanto
9540	IP-Elb-0	CS76838	ESP	41.81	2.34	Xavier Picó	Monsanto
9541	IP-Fue-2	CS76871	ESP	38.26	-5.42	Carlos Alonso-Blanco	Monsanto
9542	IP-Fun-0	CS76872	ESP	40.79	-4.05	Carlos Alonso-Blanco	Monsanto
9543	IP-Gra-0	CS76886	ESP	36.77	-5.39	Xavier Picó	Monsanto
9544	IP-Gua-1	CS76894	ESP	39.4	-5.33	Carlos Alonso-Blanco	Monsanto
9545	IP-Her-12	CS76920	ESP	39.4	-5.78	Carlos Alonso-Blanco	Monsanto
9546	IP-Hom-4	CS76929	ESP	40.82	-1.68	Carlos Alonso-Blanco	Monsanto
9547	IP-Hor-0	CS76930	ESP	41.67	2.62	Xavier Picó	Monsanto
9548	IP-Hoy-0	CS76939	ESP	40.4	-5	Carlos Alonso-Blanco	Monsanto
9549	IP-Hum-2	CS76943	ESP	42.23	-3.69	Carlos Alonso-Blanco	Monsanto
9550	IP-Iso-4	CS76946	ESP	43.05	-5.37	Carlos Alonso-Blanco	Monsanto
9551	IP-Jim-1	CS76955	ESP	42.28	-5.92	Carlos Alonso-Blanco	Monsanto
9552	IP-Lab-7	CS76995	ESP	40.87	-4.5	Carlos Alonso-Blanco	Monsanto
9553	IP-Ldd-0	CS77012	ESP	41.58	-4.71	Carlos Alonso-Blanco	Monsanto
9554	IP-Lso-0	CS77055	ESP	38.86	-3.16	Carlos Alonso-Blanco	Monsanto
9555	IP-Mar-1	CS77068	ESP	39.58	-3.93	Carlos Alonso-Blanco	Monsanto
9556	IP-Men-2	CS77081	ESP	39.66	-4.34	Xavier Picó	Monsanto
9557	IP-Moa-0	CS77102	ESP	42.46	0.7	Carlos Alonso-Blanco	Monsanto
9558	IP-Moc-11	CS77103	ESP	41.57	-5.64	Carlos Alonso-Blanco	Monsanto
9559	IP-Mon-5	CS77107	ESP	38.06	-4.38	Carlos Alonso-Blanco	Monsanto
9560	IP-Mot-0	CS77109	ESP	38.19	-6.24	Carlos Alonso-Blanco	Monsanto
9561	IP-Mun-0	CS77114	ESP	40.71	-5.04	Carlos Alonso-Blanco	Monsanto
9562	IP-Mur-0	CS77115	ESP	41.67	2	Xavier Picó	Monsanto
9564	IP-Nog-17	CS77129	ESP	40.45	-1.6	Xavier Picó	Monsanto
9565	IP-Orb-10	CS77152	ESP	42.97	-1.23	Carlos Alonso-Blanco	Monsanto
9567	IP-Pal-0	CS77159	ESP	42.34	1.3	Xavier Picó	Monsanto
9568	IP-Pan-0	CS77160	ESP	42.76	-0.23	Carlos Alonso-Blanco	Monsanto
9569	IP-Pds-1	CS77166	ESP	42.87	-6.45	Carlos Alonso-Blanco	Monsanto
9571	IP-Pro-0	CS78914	ESP	43.28	-6.01	Carlos Alonso-Blanco	Monsanto
9573	IP-Rds-0	CS77206	ESP	41.86	2.99	Xavier Picó	Monsanto
9574	IP-Rel-0	CS77209	ESP	38.6	-2.7	Carlos Alonso-Blanco	Monsanto
9576	IP-Rev-0	CS77213	ESP	40.86	-4.11	Carlos Alonso-Blanco	Monsanto
9577	IP-Ria-0	CS77216	ESP	42.34	2.17	Xavier Picó	Monsanto
9578	IP-Sac-0	CS77229	ESP	42.13	-6.7	Carlos Alonso-Blanco	Monsanto
9579	IP-San-10	CS77232	ESP	38.33	-3.51	Carlos Alonso-Blanco	Monsanto
9581	IP-Sdv-3	CS77242	ESP	42.84	-5.12	Carlos Alonso-Blanco	Monsanto
9582	IP-Ses-0	CS77244	ESP	41.48	-1.63	Carlos Alonso-Blanco	Monsanto
9583	IP-Sne-0	CS77258	ESP	37.09	-3.38	Carlos Alonso-Blanco	Monsanto
9584	IP-Stp-0	CS77283	ESP	41.19	-3.58	Carlos Alonso-Blanco	Monsanto
9585	IP-Svi-0	CS77287	ESP	43.4	-7.39	Carlos Alonso-Blanco	Monsanto
9586	IP-Tam-0	CS77340	ESP	41.03	-3.27	Carlos Alonso-Blanco	Monsanto
9587	IP-Tdc-0	CS77344	ESP	41.5	-1.88	Carlos Alonso-Blanco	Monsanto
9588	IP-Tol-7	CS77371	ESP	42.11	0.6	Xavier Picó	Monsanto
9589	IP-Tor-1	CS77378	ESP	41.6	-2.83	Carlos Alonso-Blanco	Monsanto
9590	IP-Trs-0	CS77387	ESP	43.37	-5.49	Carlos Alonso-Blanco	Monsanto
9591	IP-Vad-0	CS78826	ESP	42.86	-3.59	Carlos Alonso-Blanco	Monsanto
9592	IP-Vae-2	CS78827	ESP	42.1	-5.44	Carlos Alonso-Blanco	Monsanto
9593	IP-Vaz-0	CS78836	ESP	42.26	-2.99	Carlos Alonso-Blanco	Monsanto
9594	IP-Vdm-0	CS78837	ESP	42.04	1.01	Carlos Alonso-Blanco	Monsanto
9595	IP-Vdt-0	CS78838	ESP	40.89	-5.5	Carlos Alonso-Blanco	Monsanto
9596	IP-Ver-5	CS78841	ESP	41.95	-7.45	Carlos Alonso-Blanco	Monsanto
9597	IP-Vig-1	CS78843	ESP	42.31	-2.53	Carlos Alonso-Blanco	Monsanto
9598	IP-Vim-0	CS78844	ESP	41.88	-6.51	Carlos Alonso-Blanco	Monsanto
9599	IP-Vin-0	CS78846	ESP	42.8	-5.77	Carlos Alonso-Blanco	Monsanto
9600	IP-Vis-0	CS78848	ESP	39.85	-6.04	Carlos Alonso-Blanco	Monsanto
9601	IP-Voz-0	CS78849	ESP	41.85	-1.88	Carlos Alonso-Blanco	Monsanto
9602	IP-Vpa-1	CS78850	ESP	40.5	-3.96	Carlos Alonso-Blanco	Monsanto
9606	Aitba-1	CS76649	MAR	31.48	-7.45	0	Monsanto
9607	Panik-1	CS77161	RUS	53.05	52.15	0	Monsanto
9608	Karag-2	CS76961	RUS	51.37	59.44	0	Monsanto
9609	Adam-1	CS76645	RUS	51.41	59.98	0	Monsanto
9610	Lesno-4	CS77034	RUS	53.04	51.96	0	Monsanto
9611	Lesno-1	CS77032	RUS	53.04	51.9	0	Monsanto
9612	Lesno-2	CS77033	RUS	53.04	51.94	0	Monsanto
9613	Balan-1	CS76687	RUS	55.36	61.41	0	Monsanto
9615	Parti-1	CS77163	RUS	52.99	52.16	0	Monsanto
9616	Krazo-1	CS76984	RUS	53.06	51.96	0	Monsanto
9617	Karag-1	CS76960	RUS	51.37	59.44	0	Monsanto
9619	Basta-1	CS76691	RUS	51.84	79.48	0	Monsanto
9620	Basta-2	CS76692	RUS	51.82	79.48	0	Monsanto
9621	Basta-3	CS76693	RUS	51.84	79.46	0	Monsanto
9622	Bijisk-4	CS76707	RUS	52.52	85.27	0	Monsanto
9624	Chaba-2	CS76767	RUS	53.6	79.37	0	Monsanto
9625	Kolyv-2	CS76977	RUS	51.31	82.59	0	Monsanto
9626	Kolyv-3	CS76978	RUS	51.36	82.59	0	Monsanto
9627	Kolyv-5	CS76979	RUS	51.32	82.55	0	Monsanto
9628	Kolyv-6	CS76980	RUS	51.33	82.54	0	Monsanto
9629	K-oze-1	CS76957	RUS	51.35	82.18	0	Monsanto
9630	K-oze-3	CS76958	RUS	51.34	82.16	0	Monsanto
9631	Lebja-1	CS77015	RUS	51.65	80.79	0	Monsanto
9632	Lebja-2	CS77016	RUS	51.67	80.82	0	Monsanto
9633	Lebja-4	CS77017	RUS	51.63	80.83	0	Monsanto
9634	Masl-1	CS77073	RUS	54.13	81.31	0	Monsanto
9635	Nosov-1	CS77130	RUS	51.87	80.6	0	Monsanto
9636	Noveg-1	CS77131	RUS	51.75	80.82	0	Monsanto
9637	Noveg-2	CS77132	RUS	51.77	80.85	0	Monsanto
9638	Noveg-3	CS77133	RUS	51.73	80.86	0	Monsanto
9639	Panke-1	CS77162	RUS	53.82	80.31	0	Monsanto
9640	Rakit-1	CS77202	RUS	51.87	80.06	0	Monsanto
9641	Rakit-2	CS77203	RUS	51.9	80.06	0	Monsanto
9642	Rakit-3	CS77204	RUS	51.84	80.06	0	Monsanto
9643	Sever-1	CS77245	RUS	52.1	79.31	0	Monsanto
9644	Zupan-1	CS78882	CRO	45.07	18.72	0	Monsanto
9645	Gradi-1	CS76887	CRO	45.17	18.7	0	Monsanto
9646	Aiell-1	CS76648	ITA	39.1269	16.1702		Monsanto
9647	Basen-1	CS76690	ITA	40.37	16.77	0	Monsanto
9648	Bisig-1	CS76712	ITA	39.48	16.28	0	Monsanto
9649	Bivio-1	CS76713	ITA	39.13	16.17	0	Monsanto
9651	Filet-1	CS76858	ITA	40.68	14.87	0	Monsanto
9653	Giffo-1	CS76878	ITA	38.44	16.13	0	Monsanto
9655	Marce-1	CS77071	ITA	38.92	16.47	0	Monsanto
9656	Marti-1	CS77072	ITA	40.64	17.31	0	Monsanto
9657	Melic-1	CS77078	ITA	38.45	16.04	0	Monsanto
9658	Nicas-1	CS77127	ITA	38.97	16.34	0	Monsanto
9659	Pigna-1	CS77177	ITA	41.18	14.18	0	Monsanto
9660	Sarno-1	CS77236	ITA	40.84	14.57	0	Monsanto
9661	Cimin-1	CS76771	ITA	39.58	16.21	0	Monsanto
9663	Teano-1	CS77357	ITA	41.33	14.09	0	Monsanto
9664	Mitterberg-1-179	CS78907	ITA	46.366	11.2832	Joerg Wunder	Monsanto
9665	Mitterberg-1-180	CS78908	ITA	46.366	11.2832	Joerg Wunder	Monsanto
9666	Mitterberg-1-182	CS78909	ITA	46.366	11.2832	Joerg Wunder	Monsanto
9667	Mitterberg-1-183	CS78910	ITA	46.366	11.2832	Joerg Wunder	Monsanto
9668	Mitterberg-2-184	CS77085	ITA	46.3668	11.2837	Joerg Wunder	Monsanto
9669	Mitterberg-2-185	CS77086	ITA	46.3668	11.2837	Joerg Wunder	Monsanto
9670	Mitterberg-2-186	CS77087	ITA	46.3668	11.2837	Joerg Wunder	Monsanto
9671	Mitterberg-3-187	CS77088	ITA	46.3668	11.2837	Joerg Wunder	Monsanto
9672	Mitterberg-3-188	CS77089	ITA	46.3668	11.2837	Joerg Wunder	Monsanto
9673	Mitterberg-3-189	CS77090	ITA	46.3668	11.2837	Joerg Wunder	Monsanto
9676	Mitterberg-4-192	CS77093	ITA	46.3718	11.2866	Joerg Wunder	Monsanto
9677	Mitterberg-4-193	CS77094	ITA	46.3718	11.2866	Joerg Wunder	Monsanto
9678	Mitterberg-4-194	CS77095	ITA	46.3718	11.2866	Joerg Wunder	Monsanto
9679	Castelfed-1-195	CS76744	ITA	46.3378	11.2928	Joerg Wunder	Monsanto
9680	Castelfed-1-196	CS76745	ITA	46.3378	11.2928	Joerg Wunder	Monsanto
9681	Castelfed-1-197	CS76746	ITA	46.3378	11.2928	Joerg Wunder	Monsanto
9682	Castelfed-1-198	CS76747	ITA	46.3378	11.2928	Joerg Wunder	Monsanto
9683	Castelfed-1-199	CS76748	ITA	46.3378	11.2928	Joerg Wunder	Monsanto
9684	Castelfed-2-200	CS76749	ITA	46.3378	11.2928	Joerg Wunder	Monsanto
9685	Castelfed-2-201	CS76750	ITA	46.3378	11.2928	Joerg Wunder	Monsanto
9686	Castelfed-2-202	CS76751	ITA	46.3378	11.2928	Joerg Wunder	Monsanto
9687	Castelfed-2-203	CS76752	ITA	46.3378	11.2928	Joerg Wunder	Monsanto
9689	Castelfed-3-205	CS76754	ITA	46.3378	11.2928	Joerg Wunder	Monsanto
9690	Castelfed-3-206	CS76755	ITA	46.3378	11.2928	Joerg Wunder	Monsanto
9691	Castelfed-3-207	CS76756	ITA	46.3378	11.2928	Joerg Wunder	Monsanto
9692	Castelfed-3-208	CS76757	ITA	46.3378	11.2928	Joerg Wunder	Monsanto
9693	Castelfed-3-209	CS76758	ITA	46.3378	11.2928	Joerg Wunder	Monsanto
9694	Castelfed-4-210	CS78891	ITA	46.3378	11.2928	Joerg Wunder	Monsanto
9695	Castelfed-4-211	CS78892	ITA	46.3378	11.2928	Joerg Wunder	Monsanto
9696	Castelfed-4-214	CS78893	ITA	46.3378	11.2928	Joerg Wunder	Monsanto
9697	Dolen-1	CS76802	BUL	41.62	23.94	0	Monsanto
9698	Goced-1	CS76882	BUL	41.57	23.85	0	Monsanto
9699	Kolar-1	CS76974	BUL	41.37	23.14	0	Monsanto
9700	Dolna-1-10	CS76803	BUL	42.32	23.1	0	Monsanto
9701	Ivano-1	CS76954	BUL	43.7	25.91	0	Monsanto
9703	Melni-1	CS77079	BUL	41.53	23.39	0	Monsanto
9704	Melni-2	CS77080	BUL	41.53	23.39	0	Monsanto
9705	Choto-1	CS76769	BUL	41.5	23.33	0	Monsanto
9706	Dospa-1	CS76807	BUL	41.64	24.18	0	Monsanto
9707	Podvi-1	CS77187	BUL	41.57	24.84	0	Monsanto
9708	Kardz-1	CS76962	BUL	41.62	25.35	0	Monsanto
9709	Zerev-1-34	CS78878	BUL	41.85	23.13	0	Monsanto
9710	Zerev-1-35	CS78879	BUL	41.85	23.13	0	Monsanto
9711	Dolna-1-39	CS76804	BUL	42.32	23.1	0	Monsanto
9712	Dolna-1-40	CS76805	BUL	42.32	23.1	0	Monsanto
9713	Stara-1	CS77271	BUL	42.49	25.61	0	Monsanto
9714	Grivo-1	CS76888	BUL	41.84	25.75	0	Monsanto
9716	Leska-1-44	CS77030	BUL	41.54	24.98	0	Monsanto
9717	Kardz-2	CS76963	BUL	41.66	25.47	0	Monsanto
9718	Smolj-1	CS77256	BUL	41.55	24.75	0	Monsanto
9719	Koren-1	CS76983	BUL	41.83	25.69	0	Monsanto
9720	Malak-1	CS77064	BUL	41.77	25.68	0	Monsanto
9721	Schip-1	CS77239	BUL	42.72	25.33	0	Monsanto
9722	Groch-1	CS76890	BUL	41.71	24.41	0	Monsanto
9723	Slavi-2	CS77252	BUL	41.42	23.67	0	Monsanto
9725	Epidauros-1	CS76844	GRC	37.6	23.08	0	Monsanto
9726	Faneronemi-3	CS76853	GRC	37.07	22.04	0	Monsanto
9727	Olympia-2	CS77144	GRC	37.63	21.62	0	Monsanto
9728	Stiav-1	CS77279	SVK	48.46	18.9	0	Monsanto
9729	Stiav-2	CS77280	SVK	48.46	18.9	0	Monsanto
9730	Bela-1	CS76696	SVK	48.47	18.94	0	Monsanto
9731	Stiav-3	CS77281	SVK	48.46	18.9	0	Monsanto
9732	Halca-1	CS76909	SVK	48.47	18.96	0	Monsanto
9733	Bela-2	CS76697	SVK	48.47	18.94	0	Monsanto
9735	Bela-4	CS76699	SVK	48.47	18.94	0	Monsanto
9736	Teiu-2	CS77361	ROU	44.69	25.17	0	Monsanto
9737	Ulies-1	CS78815	ROU	45.95	22.62	0	Monsanto
9738	Bran-1	CS76722	ROU	45.57	25.42	0	Monsanto
9739	Toc-1	CS77370	ROU	46.01	22.33	0	Monsanto
9741	Orast-1	CS77151	ROU	45.84	23.16	0	Monsanto
9743	Furni-1	CS76873	ROU	45.14	25	0	Monsanto
9744	Iasi-1	CS76944	ROU	47.16	27.59	0	Monsanto
9745	Sij 1/96	CS77249	UZB	41.45	70.05	0	Monsanto
9747	Zabar-1	CS78870	SRB	44.38	21.22	0	Monsanto
9748	Zagub-1	CS78871	SRB	44.23	21.71	0	Monsanto
9749	Knjas-1	CS76971	SRB	43.54	22.29	0	Monsanto
9754	Sredn-1	CS77269	SRB	44.66	21.37	0	Monsanto
9755	Vajug-1	CS78828	SRB	44.56	22.56	0	Monsanto
9756	Staro-2	CS77273	SRB	44.3	21.08	0	Monsanto
9757	Staro-1	CS77272	SRB	44.3	21.08	0	Monsanto
9758	Altai-5	CS76433	CHN	47.75	88.4	0	Salk
9759	Anz-0	CS76439	IRN	37.47	49.47	0	Salk
9761	Bik-1	CS76449	LBN	33.92	35.7	0	Salk
9762	Etna-2	CS76487	ITA	37.69	14.98	0	Salk
9764	Qar-8a	CS76581	LBN	34.1	35.84	0	Salk
9766	Westkar-4	CS76629	KGZ	42.26	74.16	0	Salk
9768	Ru4-16	CS77225	GER	48.57	9.16	0	Monsanto
9769	HE-1	CS76916	GER	48.55	8.99	0	Monsanto
9770	KBG2-13	CS76966	GER	48.53	9.01	0	Monsanto
9771	Pfn-N2.2-6	CS77172	GER	48.56	9.11	0	Monsanto
9772	Hof-1	CS76925	GER	48.41	8.85	0	Monsanto
9774	Alt-1	CS76663	GER	48.59	9.22	0	Monsanto
9775	Berg-1	CS76701	GER	48.41	8.79	0	Monsanto
9776	Fell3-7	CS76857	GER	48.43	8.79	0	Monsanto
9777	Gn-1	CS76880	GER	48.57	9.17	0	Monsanto
9778	Bach-7	CS76679	GER	48.41	8.84	0	Monsanto
9779	Bai-10	CS76682	GER	48.5	8.78	0	Monsanto
9780	Fell2-4	CS76856	GER	48.43	8.79	0	Monsanto
9781	Kus2-2	CS76990	GER	48.52	9.11	0	Monsanto
9782	Lu3-30	CS77057	GER	48.53	9.09	0	Monsanto
9783	Tu-PK-7	CS77396	GER	48.52	9.05	0	Monsanto
9784	Erg2-6	CS76845	GER	48.5	8.8	0	Monsanto
9785	Ha-HBT1-2	CS76898	GER	48.54	9.02	0	Monsanto
9786	Ha-P-13	CS76901	GER	48.54	9.01	0	Monsanto
9787	HI-4	CS76922	GER	48.5	9	0	Monsanto
9788	KBG1-14	CS76965	GER	48.53	9.01	0	Monsanto
9789	Obh-13	CS77140	GER	48.39	8.96	0	Monsanto
9790	Gn2-3	CS76881	GER	48.58	9.18	0	Monsanto
9791	Haes-1	CS76914	GER	48.6	9.2	0	Monsanto
9792	Lu4-2	CS77058	GER	48.54	9.09	0	Monsanto
9793	Ru-N2	CS77224	GER	48.57	9.16	0	Monsanto
9794	Tu-B1-2	CS77391	GER	48.52	9.08	0	Monsanto
9795	Wank-2	CS78852	GER	48.5	9.11	0	Monsanto
9796	Bach2-1	CS76680	GER	48.41	8.84	0	Monsanto
9797	Ha-HBT2-10	CS76899	GER	48.54	9.02	0	Monsanto
9798	Ha-P2-1	CS76902	GER	48.54	9.01	0	Monsanto
9799	Hart-2	CS76913	GER	48.39	8.85	0	Monsanto
9800	Ha-S-B	CS76903	GER	48.54	9.01	0	Monsanto
9801	Ha-SP-2	CS76904	GER	48.54	9.01	0	Monsanto
9802	Kus3-1	CS76991	GER	48.51	9.11	0	Monsanto
9803	Muh-2	CS77113	GER	48.42	8.76	0	Monsanto
9804	Obe1-15	CS77139	GER	48.45	8.87	0	Monsanto
9805	Pfn-10	CS77171	GER	48.54	9.09	0	Monsanto
9806	Ru-2	CS77223	GER	48.56	9.16	0	Monsanto
9807	Schl-7	CS77240	GER	48.6	9.22	0	Monsanto
9808	Tu-B2-3	CS77392	GER	48.52	9.08	0	Monsanto
9809	Tu-KB-6	CS77393	GER	48.52	9.05	0	Monsanto
9810	Tu-KS-7	CS77394	GER	48.53	9.07	0	Monsanto
9811	Tu-NK-12	CS77395	GER	48.52	9.05	0	Monsanto
9812	Tu-W1	CS77397	GER	48.52	9.03	0	Monsanto
9813	BI-4	CS76706	GER	48.4	8.77	0	Monsanto
9814	Fell1-10	CS76855	GER	48.42	8.79	0	Monsanto
9815	Ha-HBT3-11	CS76900	GER	48.54	9.02	0	Monsanto
9816	Tu-WH	CS77398	GER	48.55	9.06	0	Monsanto
9817	IP-Ace-0	CS76642	ESP	39.84	-6.6	Carlos Alonso-Blanco	Monsanto
9819	IP-Amu-0	CS76664	ESP	42.35	-3.03	Carlos Alonso-Blanco	Monsanto
9820	IP-Are-0	CS76671	ESP	41	-4.71	Carlos Alonso-Blanco	Monsanto
9821	IP-Aru-0	CS76674	ESP	41.81	2.49	Xavier Picó	Monsanto
9822	IP-Aul-0	CS76675	ESP	40.52	-4.02	Carlos Alonso-Blanco	Monsanto
9823	IP-Bae-0	CS76681	ESP	43.34	-5.84	Carlos Alonso-Blanco	Monsanto
9824	IP-Bes-5	CS76702	ESP	42.91	-4.91	Carlos Alonso-Blanco	Monsanto
9825	IP-Boa-0	CS76714	ESP	40.4	-3.88	Carlos Alonso-Blanco	Monsanto
9826	IP-Bor-0	CS76717	ESP	42.49	-6.71	Carlos Alonso-Blanco	Monsanto
9827	IP-Bos-0	CS76719	ESP	42.78	0.69	Xavier Picó	Monsanto
9828	IP-Bra-0	CS76721	ESP	42.5	-6.15	Xavier Picó	Monsanto
9830	IP-Bus-0	CS76736	ESP	36.97	-3.28	Carlos Alonso-Blanco	Monsanto
9831	IP-Cas-0	CS76743	ESP	38.54	-3.39	Carlos Alonso-Blanco	Monsanto
9832	IP-Cat-0	CS76759	ESP	40.54	-3.69	Carlos Alonso-Blanco	Monsanto
9833	IP-Cha-0	CS76764	ESP	40.38	-4.21	Carlos Alonso-Blanco	Monsanto
9834	IP-Cho-0	CS76768	ESP	40.51	-3.9	Carlos Alonso-Blanco	Monsanto
9835	IP-Cir-0	CS76772	ESP	40.61	-6.57	Carlos Alonso-Blanco	Monsanto
9836	IP-Cod-0	CS76777	ESP	41.25	-1.32	Carlos Alonso-Blanco	Monsanto
9837	IP-Con-0	CS76780	ESP	37.94	-5.6	Xavier Picó	Monsanto
9838	IP-Cot-0	CS76784	ESP	41.83	-5.38	Carlos Alonso-Blanco	Monsanto
9839	IP-Coy-0	CS76785	ESP	40.44	-4.27	Carlos Alonso-Blanco	Monsanto
9840	IP-Dar-0	CS76792	ESP	41.13	-1.43	Carlos Alonso-Blanco	Monsanto
9841	IP-Ees-0	CS76836	ESP	40.59	-4.15	Carlos Alonso-Blanco	Monsanto
9843	IP-Elp-0	CS76840	ESP	40.53	-3.92	Carlos Alonso-Blanco	Monsanto
9844	IP-Esn-2	CS76846	ESP	42.27	0.19	Carlos Alonso-Blanco	Monsanto
9845	IP-Evs-0	CS76848	ESP	40.48	-3.96	Carlos Alonso-Blanco	Monsanto
9846	IP-Ezc-2	CS76849	ESP	42.31	-3.02	Carlos Alonso-Blanco	Monsanto
9847	IP-Fel-2	CS76854	ESP	43.31	-5.7	Carlos Alonso-Blanco	Monsanto
9848	IP-Glo-1	CS76879	ESP	40.11	-5.77	Carlos Alonso-Blanco	Monsanto
9849	IP-Gud-3	CS76895	ESP	40.65	-4.11	Carlos Alonso-Blanco	Monsanto
9850	IP-Hec-0	CS76917	ESP	42.86	-0.7	Carlos Alonso-Blanco	Monsanto
9851	IP-Hue-3	CS76942	ESP	42.96	-6.1	Carlos Alonso-Blanco	Monsanto
9852	IP-Ini-0	CS76945	ESP	40.46	-3.75	Carlos Alonso-Blanco	Monsanto
9853	IP-Lac-0	CS76996	ESP	43.33	-5.91	Carlos Alonso-Blanco	Monsanto
9854	IP-Laf-1	CS76997	ESP	43.36	-5.88	Carlos Alonso-Blanco	Monsanto
9855	IP-Lam-0	CS77008	ESP	40.57	-3.89	Carlos Alonso-Blanco	Monsanto
9856	IP-Lch-0	CS77010	ESP	40.51	-4	Carlos Alonso-Blanco	Monsanto
9857	IP-Leg-0	CS77019	ESP	40.33	-3.8	Carlos Alonso-Blanco	Monsanto
9858	IP-Loz-0	CS77051	ESP	40.98	-3.8	Carlos Alonso-Blanco	Monsanto
9859	IP-Lro-0	CS77054	ESP	40.5	-3.88	Carlos Alonso-Blanco	Monsanto
9860	IP-Lum-0	CS77059	ESP	42.24	-2.62	Carlos Alonso-Blanco	Monsanto
9861	IP-Mac-0	CS77061	ESP	40.72	-3.21	Carlos Alonso-Blanco	Monsanto
9862	IP-Mad-0	CS77062	ESP	40.45	-3.67	Carlos Alonso-Blanco	Monsanto
9864	IP-Mat-0	CS77074	ESP	41.76	2.69	Xavier Picó	Monsanto
9866	IP-Mdd-0	CS77076	ESP	41.89	-2.79	Carlos Alonso-Blanco	Monsanto
9867	IP-Mie-1	CS77083	ESP	40.94	-3.22	Xavier Picó	Monsanto
9868	IP-Moe-0	CS77104	ESP	41.78	2.37	Xavier Picó	Monsanto
9869	IP-Moj-0	CS77105	ESP	36.76	-5.28	Xavier Picó	Monsanto
9870	IP-Moz-0	CS77111	ESP	41.91	0.17	Carlos Alonso-Blanco	Monsanto
9871	IP-Nac-0	CS77117	ESP	40.75	-3.99	Carlos Alonso-Blanco	Monsanto
9873	IP-Ndc-0	CS77125	ESP	37.94	-5.45	Xavier Picó	Monsanto
9874	IP-Oja-0	CS77143	ESP	42.34	-3	Carlos Alonso-Blanco	Monsanto
9875	IP-Ovi-1	CS77155	ESP	43.38	-5.87	Carlos Alonso-Blanco	Monsanto
9876	IP-Pad-0	CS77158	ESP	41.34	0.99	Carlos Alonso-Blanco	Monsanto
9877	IP-Pdl-0	CS77165	ESP	43.02	-5.6	Carlos Alonso-Blanco	Monsanto
9878	IP-Pee-0	CS77167	ESP	40.78	-3.62	Carlos Alonso-Blanco	Monsanto
9879	IP-Per-0	CS77169	ESP	37.6	-1.12	Carlos Alonso-Blanco	Monsanto
9880	IP-Pib-1	CS77175	ESP	42.72	-3.44	Carlos Alonso-Blanco	Monsanto
9881	IP-Pie-0	CS77176	ESP	40.46	-5.32	Carlos Alonso-Blanco	Monsanto
9882	IP-Pil-0	CS77178	ESP	40.46	-4.26	Carlos Alonso-Blanco	Monsanto
9883	IP-Piq-0	CS77179	ESP	42.1	-2.56	Carlos Alonso-Blanco	Monsanto
9885	IP-Prd-0	CS77189	ESP	41.14	-3.68	Carlos Alonso-Blanco	Monsanto
9886	IP-Pru-0	CS77190	ESP	42.38	1.73	Xavier Picó	Monsanto
9887	IP-Pun-0	CS77196	ESP	40.4	-4.77	Carlos Alonso-Blanco	Monsanto
9888	IP-Pva-1	CS77197	ESP	40.93	-3.31	Xavier Picó	Monsanto
9890	IP-Rib-1	CS77217	ESP	43.16	-5.07	Carlos Alonso-Blanco	Monsanto
9891	IP-Sal-0	CS77230	ESP	41.93	2.92	Xavier Picó	Monsanto
9892	IP-Sam-0	CS77231	ESP	42.68	-6.96	Carlos Alonso-Blanco	Monsanto
9894	IP-Sen-0	CS77243	ESP	42.59	0.76	Xavier Picó	Monsanto
9895	IP-Sfb-6	CS77248	ESP	41.78	2.57	Xavier Picó	Monsanto
9897	IP-Smt-1	CS77257	ESP	40.95	-5.63	Xavier Picó	Monsanto
9898	IP-Som-0	CS77259	ESP	41.14	-3.58	Carlos Alonso-Blanco	Monsanto
9899	IP-Tau-0	CS77342	ESP	42.54	0.84	Xavier Picó	Monsanto
9900	IP-Tri-0	CS77386	ESP	37.38	-6.01	Xavier Picó	Monsanto
9901	IP-Urd-1	CS78824	ESP	42.27	-2.98	Carlos Alonso-Blanco	Monsanto
9902	IP-Usa-0	CS78825	ESP	40.71	-3.24	Carlos Alonso-Blanco	Monsanto
9903	IP-Val-0	CS78829	ESP	42.31	-3.1	Carlos Alonso-Blanco	Monsanto
9904	IP-Vas-0	CS78833	ESP	40.95	-3.31	Carlos Alonso-Blanco	Monsanto
9905	IP-Ven-0	CS78840	ESP	40.76	-4.01	Carlos Alonso-Blanco	Monsanto
9906	IP-Mah-6	CS77063	ESP	40	4.25	Xavier Picó	Monsanto
9908	ESP-1-11	CS76847	FRA	50.72	3.47	0	Monsanto
9909	GEN-8	CS76877	FRA	50.59	3.3	0	Monsanto
9910	BRI-2	CS76725	FRA	50.68	3.52	0	Monsanto
9911	ARGE-1-15	CS76672	FRA	47.16	4.28	0	Monsanto
9912	CIRY-13	CS76773	FRA	46.67	4.55	0	Monsanto
9914	IST-29	CS76948	FRA	47.58	5.33	0	Monsanto
9915	MAR-4-16	CS77069	FRA	47.45	3.94	0	Monsanto
9917	RAD-21	CS77200	FRA	46.69	4.34	0	Monsanto
9918	SAUL-24	CS77237	FRA	47.43	5.21	0	Monsanto
9920	DIR-9	CS76796	FRA	48.54	4.32	0	Monsanto
9921	FOR-23	CS76867	FRA	48.57	4.41	0	Monsanto
9924	PLY-20	CS77181	FRA	48.59	4.24	0	Monsanto
9925	RUM-20	CS77226	FRA	48.91	4.52	0	Monsanto
9926	TRE-1	CS77385	FRA	48.86	4.1	0	Monsanto
9927	ARR-17	CS76673	FRA	44.05	3.69	0	Monsanto
9928	BEZ-9	CS76703	FRA	44.12	3.77	0	Monsanto
9929	ISS-20	CS76947	FRA	43.92	3.71	0	Monsanto
9930	LEC-25	CS77018	FRA	43.91	4.14	0	Monsanto
9932	NOZ-6	CS77134	FRA	44.12	4.33	0	Monsanto
9933	VED-10	CS78839	FRA	43.74	3.89	0	Monsanto
9935	BAU-15	CS76694	FRA	50.6	2.93	0	Monsanto
9937	CATS-6	CS76760	FRA	50.79	2.69	0	Monsanto
9938	WAV-8	CS78854	FRA	50.65	2.99	0	Monsanto
9939	Aitba-2	CS76347	MAR	31.48	-7.45		MPI
9941	Fei-0	CS76412	POR	40.92	-8.54		MPI
9942	Agu-1	CS76409	ESP	41.32	-1.34		MPI
9943	Cdm-0	CS76410	ESP	39.73	-5.74		MPI
9944	Don-0	CS76411	ESP	36.83	-6.36		MPI
9945	Leo-1	CS76413	ESP	41.8	-3.11		MPI
9946	Mer-6	CS76414	ESP	38.92	-6.34		MPI
9947	Ped-0	CS76415	ESP	40.74	-3.9		MPI
9948	Pra-6	CS76416	ESP	41.05	-3.54		MPI
9949	Qui-0	CS76417	ESP	42.69	-6.93		MPI
9950	Vie-0	CS76418	ESP	42.63	0.76		MPI
9951	Kly-1	CS76385	RUS	51.3333	82.5667	Heike Schmuths	MPI
9952	Kly-4	CS76384	RUS	51.32	82.55		MPI
9953	Koz-2	CS76383	RUS	51.33	82.19		MPI
9955	Stepn-2	CS76377	RUS	54.09	60.46		MPI
9956	Stepn-1	CS76378	RUS	54.06	60.48		MPI
9957	Borsk-2	CS76421	RUS	53.04	51.75		MPI
9958	Shigu-1	CS76375	RUS	53.33	49.48		MPI
9959	Shigu-2	CS76374	RUS	53.33	49.48		MPI
9960	Kidr-1	CS76376	RUS	51.31	57.56		MPI
9962	Galdo-1	CS76423	ITA	40.57	15.32		MPI
9963	Lago-1	CS76367	ITA	39.18	16.26		MPI
9964	Mammo-1	CS76365	ITA	38.36	16.23		MPI
9965	Mammo-2	CS76364	ITA	38.38	16.22		MPI
9966	Monte-1	CS76361	ITA	40.28	15.65		MPI
9968	Timpo-1	CS76424	ITA	39.27	16.27		MPI
9969	Valsi-1	CS76425	ITA	40.18	16.45		MPI
9970	Altenb-2	CS76353	ITA	46.3716	11.2376	Joerg Wunder	MPI
9971	Bozen-1.1	CS76357	ITA	46.513	11.331	Joerg Wunder	MPI
9972	Bozen-1.2	CS76358	ITA	46.513	11.331	Joerg Wunder	MPI
9973	Mitterberg-1-181	CS76354	ITA	46.366	11.2832	Joerg Wunder	MPI
9974	Castelfed-4-212	CS76355	ITA	46.3378	11.2928	Joerg Wunder	MPI
9975	Castelfed-4-213	CS76356	ITA	46.3378	11.2928	Joerg Wunder	MPI
9976	Rovero-1	CS76351	ITA	46.2543	11.167	Joerg Wunder	MPI
9978	Vezzano-2.2	CS76350	ITA	46.6297	10.817	Joerg Wunder	MPI
9979	Voeran-1	CS76352	ITA	46.36	11.23		MPI
9980	Angel-1	CS76362	ITA	38.62	16.17		MPI
9981	Angit-1	CS76366	ITA	38.76	16.24		MPI
9982	Apost-1	CS76368	ITA	39.01	16.47		MPI
9983	Ciste-1	CS76359	ITA	41.62	12.87		MPI
9984	Ciste-2	CS76360	ITA	41.62	12.87		MPI
9985	Slavi-1	CS76419	BUL	41.43	23.65		MPI
9986	Jablo-1	CS76372	BUL	41.59	25.2		MPI
9987	Lecho-1	CS76371	BUL	41.43	23.5		MPI
9988	Bak-2	CS76392	GEO	41.7942	43.4767	James Beck	MPI
9990	Lag2-2	CS76390	GEO	41.8296	46.2831	James Beck	MPI
9991	Vash-1	CS76391	GEO	41.2381	46.3728	James Beck	MPI
9993	Nemrut-1	CS76398	TUR	38.6425	42.2394	James Beck	MPI
9995	HKT2.4	CS76404	GER	48.14	9.4		MPI
9996	Nie1-2	CS76402	GER	48.52	8.8		MPI
9997	Rue3.1-31	CS76406	GER	48.56	9.16		MPI
9998	Star-8	CS76400	GER	48.43	8.82		MPI
9999	TueSB30-3	CS76403	GER	48.53	9.06		MPI
10001	TueV-13	CS76407	GER	48.52	9.05	Kirsten Bomblies	MPI
10002	TueWal-2	CS76405	GER	48.53	9.04	Kirsten Bomblies	MPI
10004	Bolin-1	CS76373	ROU	44.46	25.74		MPI
10005	Copac-1	CS76420	ROU	46.11	21.95		MPI
10006	Kastel-1	CS76395	UKR	44.6419	34.3814	James Beck	MPI
10008	Sij-1	CS76379	UZB	41.45	70.05	Heike Schmuths	MPI
10009	Sij-2	CS76380	UZB	41.45	70.05		MPI
10010	Sij-4	CS76381	UZB	41.45	70.05		MPI
10011	Yeg-1	CS76394	ARM	39.8692	45.3622	James Beck	MPI
10012	Istisu-1	CS76389	AZE	38.9786	48.5594	James Beck	MPI
10013	Lerik1-3	CS76388	AZE	38.7406	48.6131	James Beck	MPI
10014	Xan-1	CS76387	AZE	38.6536	48.7992	James Beck	MPI
10015	Ara-1	CS76382	AFG	37.29	71.3		MPI
10017	Petro-1	CS76370	SRB	44.34	21.46		MPI
10018	Dobra-1	CS76369	SRB	44.84	20.16		MPI
10020	Jl-2	CS76956	CZE	49.17	16.5		MPI
10022	Uk-3	CS78777	GER	48.0333	7.7667	Albert Kranz	MPI
10023	Strand-1	CS77284	NOR	68.8	15.45		MPI
10027	Uk-6	CS78938	GER	48.0284	7.76557	Eunyoung Chae	MPI
14312	Kos-1	CS78923	RUS	62.02	34.12	Magnus Nordborg	GMI
14313	Kos-2	CS78924	RUS	62.02	34.12	Magnus Nordborg	GMI
14314	Radk-1	CS78927	RUS	61.59	35.11	Magnus Nordborg	GMI
14315	Radk-2	CS78928	RUS	61.59	35.11	Magnus Nordborg	GMI
14318	Shu-1	CS78930	RUS	61.94	34.24	Magnus Nordborg	GMI
14319	Shu-2	CS78931	RUS	61.94	34.24	Magnus Nordborg	GMI
15560	Valm	CS78932	RUS	61.37	61.37	Magnus Nordborg	GMI
15591	OOE1-1	CS78939	AUT	48.3315	14.7266	Wolfram Weckwert	GMI
15592	OOE3-1	CS78940	AUT	48.3315	14.7159	Wolfram Weckwert	GMI
15593	OOE3-2	CS78941	AUT	48.3315	14.7159	Wolfram Weckwert	GMI
18694	Pien	CS78926	RUS	60.4	32.09	Magnus Nordborg	GMI
18696	Samm	CS78929	RUS	61.57	30.63	Magnus Nordborg	GMI
19949	OOE2-1	CS79036	AUT	48.3268	14.7182	Wolfram Weckwert	GMI
19950	OOE2-2	CS79037	AUT	48.3268	14.7182	Wolfram Weckwert	GMI
19951	OOE23	CS79038	AUT	48.3268	14.7182	Wolfram Weckwert	GMI
