# Supplementary material for: Massive variation of short tandem repeats with functional consequences across strains of Arabidopsis thaliana
Source: HighWire-hosted journal article supplement (doi:10.1101/gr.231753.117), 2018-07-03
Supplement: Supplemental_File_S4.zip [file 2100_mips_designed.xlsx]

## Sheet: Sheet1
>mip_key	logistic_score	chr	ext_probe_start	ext_probe_stop	ext_probe_copy	ext_probe_sequence	lig_probe_start	lig_probe_stop	lig_probe_copy	lig_probe_sequence	mip_scan_start_position	mip_scan_stop_position	scan_target_sequence	mip_sequence	feature_start_position	feature_stop_position	probe_strand	failure_flags	mip_name
1:8641-8820/16,29/-	0.976002	1	8805	8820	1	AAAAGTGGGCCTAACA	8641	8669	1	GCAATGGCGGCGAGTGAACACAGATGCGT	8670	8804	AATTTAAAGTTAAGACTTCAAAAACTTGGCCCATGAATAAGCCCATTTAGGGTTAAAACAGTAGCCCAGACCCGGACTCTAATTGCTCCGTATTCTTCTTCTCTTGAGAGAGAGAGAGAGAGAGAGAGAGAGAGA	GCAATGGCGGCGAGTGAACACAGATGCGTCTTCAGCTTCCCGATATCCGACGGTAGTGTNNNNNNNNAAAAGTGGGCCTAACA	8669	8699	-	10	18_0001
1:20494-20673/16,29/+	0.912647	1	20494	20509	1	AACTTTATATCGGAGA	20645	20673	1	CAATGAATACCGTTGGAGGCTTCGCAGGC	20510	20644	ATATATATATATATATATATATTTTTTAAGTATAGAAAATAGAAATATGACGTGCTAAATTGAGCTATGGACAAAATCATATATGAGAAAATGAATGTAGATGGATAGAGTCGTCCCACACTTAAGGTTGGTCCA	CAATGAATACCGTTGGAGGCTTCGCAGGCCTTCAGCTTCCCGATATCCGACGGTAGTGTNNNNNNNNAACTTTATATCGGAGA	20510	20531	+	10	33_0001_SNP_a
1:62308-62487/16,29/+	0.971017	1	62308	62323	1	TAACAAAGACACAACA	62459	62487	1	CAAAGATGAGAAGAGCAAGTCAAAGAAGA	62324	62458	ACATTAATTGACACAGAGAAATCAAGAAGAAGAAGAAGAAGAAGAAGAACAAACCTTGTAGTTGTCTTGTTGAAATCATGAATCCTTGATTAAATTTCTATAAGAAGAAAAGTTTCAGTGAGAAGAAGATCATAG	CAAAGATGAGAAGAGCAAGTCAAAGAAGACTTCAGCTTCCCGATATCCGACGGTAGTGTNNNNNNNNTAACAAAGACACAACA	62347	62372	+	0	61_0002
1:64779-64958/20,25/+	0.980295	1	64779	64798	1	CGACCACTTTTGTCTCCTTT	64934	64958	1	TGGCTTTGCGGTTTCTTCCATTTTC	64799	64933	CATTTTTATCTGCGAAGTTTACTTAAACAATGTTTAACGAAGCTACAAAGACATTAGTTGACACAAACAAAATCAAGAAGAAGAAGAAGAAGAAGAACAGACCTTGTAGTTGTCTTTACGGACATTAAAGCCTAA	TGGCTTTGCGGTTTCTTCCATTTTCCTTCAGCTTCCCGATATCCGACGGTAGTGTNNNNNNNNCGACCACTTTTGTCTCCTTT	64873	64895	+	0	67_0003
1:72330-72509/17,28/+	0.962136	1	72330	72346	1	GAGTTTTGTAAAGACAA	72482	72509	1	CATTTCCTGCGTTTGGATCGGTCTGGGT	72347	72481	ATTAGAGAGAGAGAGAGAGAGACAGAGGCATTTTTGGTCATAAAATCCACACAGAGGTGGTTCGACATCCAGGTGAATCCAAGTAATAAATTGCAGGATTCTCTCTCTATAATATATATAGATATAGCTTGCAAT	CATTTCCTGCGTTTGGATCGGTCTGGGTCTTCAGCTTCCCGATATCCGACGGTAGTGTNNNNNNNNGAGTTTTGTAAAGACAA	72350	72373	+	0	71_0004
1:97155-97334/16,29/-	0.982456	1	97319	97334	1	AAAGGGAACATAAAAC	97155	97183	1	GCTCAATGGTCTTTACGTCAAGGTTGAGA	97184	97318	CAACATGAGGATTCTAACTGAAATGTTTTCTTATGTATATCGAAATTCGTGAACAAAGGTGATAGGTATCTGTTTGTCACCTAACATAGTCGGTATCAGAATCTTCTTCTTCGTCTTCTTCTTCTTCTTCACCTT	GCTCAATGGTCTTTACGTCAAGGTTGAGACTTCAGCTTCCCGATATCCGACGGTAGTGTNNNNNNNNAAAGGGAACATAAAAC	97189	97217	-	0	94_0005
1:101786-101965/16,28/+	0.952867	1	101786	101801	2	TTGTGTGATGTTTGTG	101938	101965	1	ATTTGAGCTGAAAGTTTGCTACAAGTGG	101802	101937	TAAATTTAATCTTCTGTAGAAGTTTATTTGGTTAGGGTCTCTCTCTCTCTCTCTCTCTCTGCTACACAAAATTGAGAAGCATCAAACTTGGAAATTCATCAGAAGCTTGAGAATGTTGGAATCAAATAAATCTTAT	ATTTGAGCTGAAAGTTTGCTACAAGTGGCTTCAGCTTCCCGATATCCGACGGTAGTGTNNNNNNNNTTGTGTGATGTTTGTG	101839	101861	+	0	96_0006
1:151027-151206/16,24/+	0.983987	1	151027	151042	1	AAGCAAAAATCACGGA	151183	151206	1	GTGGTAGTAGTGTTGGTGAGAGTG	151043	151182	ATTCAGAAAAAGCAAAGCAAAGCAAAGCAAAGCAAACCTAAATGAAGTTTTTATGGAAACAAATGACCCTTGGCGACTTTACTGAAGATTTTCATCCAAAGCAGAGTGATCCTGATCATGTCCTGGAGCCATGGATGGTT	GTGGTAGTAGTGTTGGTGAGAGTGCTTCAGCTTCCCGATATCCGACGGTAGTGTNNNNNNNNAAGCAAAAATCACGGA	151051	151078	+	0	116_0007
1:182206-182385/17,23/+	0.980291	1	182206	182222	1	TGAAGACGATAAGAGAG	182363	182385	1	GAGAGAGAGAGAGAGCGACGAGA	182223	182362	ATTGGACACTGATCGTTATTAAAAAAATACCCAAATCCTGACAAATACTGGAGAGATTAATAGAGAGAAAGATGCATGCAGAGAGAGAGAGATCAGTAGTCTCTCAATAATGAATGAATGAATGAATGAATGGTACGAAA	GAGAGAGAGAGAGAGCGACGAGACTTCAGCTTCCCGATATCCGACGGTAGTGTNNNNNNNNTGAAGACGATAAGAGAG	182328	182354	+	0	127_0008
1:246612-246791/16,29/-	0.98045	1	246776	246791	1	AAAAAGCAATGAGAGC	246612	246640	1	GCTGTTGTTCGATTTCATATGTGATGTTG	246641	246775	GATGAAGACCCACGTCTCGAAGATTTCAAGTGTCCCATTTCAATGGTTAGGATATTTGAAGTATATATATATATATATATATTTCCTTGATTTTCAGCTCTTGAAACAAAACTAGACTTGTTCCACATCATCAAC	GCTGTTGTTCGATTTCATATGTGATGTTGCTTCAGCTTCCCGATATCCGACGGTAGTGTNNNNNNNNAAAAAGCAATGAGAGC	246694	246714	-	0	158_0009
1:270472-270651/16,29/+	0.985432	1	270472	270487	1	TTATTAAACACAAACA	270623	270651	1	GGATCAAGAGCGTTGGGCTCTGGACCGTA	270488	270622	AAAAAAAAAGAGAGAGAGAGAGAGAGAGAGAGAGAGAGAGAGAGAGAGAGAGAGAGAGAGAGAGAGAGAGAGAGAGAGAGAGAGAGAGAGAGAGAGAGAGAGAGAGAGAGAGAGAGAGAGAGAGAGAAACTCACA	GGATCAAGAGCGTTGGGCTCTGGACCGTACTTCAGCTTCCCGATATCCGACGGTAGTGTNNNNNNNNTTATTAAACACAAACA	270496	270614	+	0	175_0010
1:271560-271739/17,28/+	0.980099	1	271560	271576	1	ACTGTACGAAGAGATGA	271712	271739	1	GCGACAAGGTGGTTGGAGGGTCGGCATT	271577	271711	TTGGAGAGTCTCCCAAACGTGAGAAAACAGCTAAGAGCGACTCTTTATCCAACGGAAAGGCGACTACTACTACTACTACTACTACTAGTGTACTGAGATCATCTGAAACTGAGAAGCACAGCTCTGATGGAGATG	GCGACAAGGTGGTTGGAGGGTCGGCATTCTTCAGCTTCCCGATATCCGACGGTAGTGTNNNNNNNNACTGTACGAAGAGATGA	271639	271663	+	0	176_0011
1:295377-295556/16,27/+	0.981733	1	295377	295392	1	TCGTCGTTGTCTGTGG	295530	295556	1	CCGGAAACGGATGCAGAATTGCGAAGA	295393	295529	CGTTATCCGCCGCGAGTCGTGAGATGAAGCAAAGGAAGGAGAAATCTCACCGTAGGCGAGAAACCAGGAAGAGGGACAAGAAGAAGAAGAAGAAGAAGGATAGTAACAACAATACGAAGCTAGTGATCGGAACAAAG	CCGGAAACGGATGCAGAATTGCGAAGACTTCAGCTTCCCGATATCCGACGGTAGTGTNNNNNNNNTCGTCGTTGTCTGTGG	295470	295490	+	0	188_0012
1:298138-298317/17,28/-	0.913363	1	298301	298317	1	CTCACACTATATTTTAA	298138	298165	1	TCACGGTGCGTTCGTCTGGCGGCTTCAT	298166	298300	CTTTTTTTTTTTAGGTCTATCTTGTTGCTAGGAAACATAATAATAACACACACACACACACACACAAAAAAAAGAACGATAGAGATATTTAGTGATAATTTTGTTGGGTCAACGTAATCAACGGTCAGAAATAGA	TCACGGTGCGTTCGTCTGGCGGCTTCATCTTCAGCTTCCCGATATCCGACGGTAGTGTNNNNNNNNCTCACACTATATTTTAA	298235	298255	-	0	189_0013
1:354603-354782/19,26/+	0.980326	1	354603	354621	1	GTGCTTCGTCTGGTTGTGG	354757	354782	1	ATGGAGAGAAGAGAGGTCGAAGACGC	354622	354756	TACTTGAGGACCAATTCAAGCGAAGAGGAGGAATCGTCCTTGTTAGGGTTTTCCACAGAAGAAGAAGAAGAAGAAGAAGAAGAAGAAGAAGAGAAGGTCATGGCGAAGATAAAGGCACTTTTTGGTGTTCGAGGA	ATGGAGAGAAGAGAGGTCGAAGACGCCTTCAGCTTCCCGATATCCGACGGTAGTGTNNNNNNNNGTGCTTCGTCTGGTTGTGG	354678	354717	+	0	211_0014
1:355494-355673/16,26/-	0.980951	1	355658	355673	1	TCAGGCGTTAGGGGGA	355494	355519	1	CTCGGAGGTCACAAAAGATCTCACGC	355520	355657	CACAGAGCAAGCCACAAGAAGAAGATAGCAGAAACAGATCAATTAGGCTCAGATGAGTTGAAGAAGAAGAAGAAGAAGAGTACTAGTAGTCACCATGAATGTCCAATCTGTGCCAAAGTCTTCACATCTGGTCAAGCT	CTCGGAGGTCACAAAAGATCTCACGCCTTCAGCTTCCCGATATCCGACGGTAGTGTNNNNNNNNTCAGGCGTTAGGGGGA	355579	355598	-	0	212_0015
1:366813-366992/16,26/-	0.981149	1	366977	366992	1	GGTGACTCTGGTCATC	366813	366838	1	CGGTGTCTTGGGTGGCGGAGGCTGAT	366839	366976	ATCATCATCACATATTCCCATTTATTAATTAAATGCACACATATATCTAGAGATTATCTTAATTTGAAAGAGGATATATATATATATATATATATGATAAGAGAATTAAGTACGTACTTGGAGTAGTCTTGCCGGTGC	CGGTGTCTTGGGTGGCGGAGGCTGATCTTCAGCTTCCCGATATCCGACGGTAGTGTNNNNNNNNGGTGACTCTGGTCATC	366878	366903	-	0	222_0016
1:420868-421047/19,26/-	0.914994	1	421029	421047	1	CTGCCTCCAGTATCGCTTT	420868	420893	1	GGACCTGTAGATTATATCTAGGTATC	420894	421028	CTCAATCATGTTATTGATCGCTTCTTTCCTCCATTTTAACAAGTACTGCATGCATCATATATATATCACCATTAATATATATGCATCAGCAAGTTAACCAGCCTATATATATGATGATGATGATGATGATGATGA	GGACCTGTAGATTATATCTAGGTATCCTTCAGCTTCCCGATATCCGACGGTAGTGTNNNNNNNNCTGCCTCCAGTATCGCTTT	420894	420918	-	0	232_0017
1:446148-446347/16,28/-	0.971642	1	446332	446347	1	CGAAACCAACGGTTCA	446148	446175	1	GCAGGCTGAGCTTGATTCTACGGTCTAG	446176	446331	TATTTTTTTTTAACTTATGAATAAAATAATAATAATAATAATAATCAAGTACTGCCAAAAAGAATAAATCCGATAGAAATTCATTATAAGATGAGAAAAAAGATCTGTTGAGAGAATTCGAAAGAAAAACTCAAATGCAAAGCCATCAGAATCGAA	GCAGGCTGAGCTTGATTCTACGGTCTAGCTTCAGCTTCCCGATATCCGACGGTAGTGTNNNNNNNNCGAAACCAACGGTTCA	446287	446312	-	0	264_0002
1:505748-505927/16,28/+	0.945554	1	505748	505763	1	TACCAAAATCACGGCA	505900	505927	1	CCCATCGGTGTTGGGACTTAACGGTGGA	505764	505899	TATAAATATATATATATATATATATATATATATATATTTTGGCGGCTACCAAACTTTGATATAAAATAAAAATGGGTTTACCATTGGAGATAATGGAATTGTAGATGGTAACGGAGTTAGAGTTTTCGATGTGGAT	CCCATCGGTGTTGGGACTTAACGGTGGACTTCAGCTTCCCGATATCCGACGGTAGTGTNNNNNNNNTACCAAAATCACGGCA	505763	505800	+	10	299_0020_SNP_a
1:641858-642037/16,28/+	0.966011	1	641858	641873	1	GTCGTTCGGCGAAGAG	642010	642037	1	GCGTGAGAGTTTATTGATGATAATAAGC	641874	642009	AAATAGATGAGAATGATGATAGAATTTGGCTTTCGTTTCTCGAAGAAGAAAAATAAGAAAGAAGTAGGTGAATAGAGAATTTTGATTTCTCAAGTATGAAGAAGAAGAAGAAGAAGAAGAAGAAGAAGAAGAGAAT	GCGTGAGAGTTTATTGATGATAATAAGCCTTCAGCTTCCCGATATCCGACGGTAGTGTNNNNNNNNGTCGTTCGGCGAAGAG	641971	642008	+	0	414_0021
1:644439-644618/22,23/+	0.979433	1	644439	644460	2	GGGAGGAGAAAGCTTGAAGAGT	644596	644618	1	GACAGTGTACGTCACCGATTGCG	644461	644595	GAATCATAACATCCATGGCTGACATCGGAGACAAGAAGAAGAAGAAGAAGAAGAAGGAATTGTGTTTCTGATAATTTTGTTGTTATGTATTGATTCATTCAATAAATCACTGTGGTTGCTGAAAAATTAAATATA	GACAGTGTACGTCACCGATTGCGCTTCAGCTTCCCGATATCCGACGGTAGTGTNNNNNNNNGGGAGGAGAAAGCTTGAAGAGT	644493	644516	+	0	416_0022
1:645271-645450/18,26/+	0.967375	1	645271	645288	2	CTCTCTCAATCTCTCTGT	645425	645450	1	GCTCGTTCCATTGCTGGAGCTCATTC	645289	645424	ACAACATATAAATTAGAGAGAGATTTATATATATATATATATATATATATAAACTAACAAAACACAACCTCTCTGTTTTCTCTTTACATGAAGTAACTCAGTGATGTCTTCTTCCTCGAGCCTCCTTCTCCATAGA	GCTCGTTCCATTGCTGGAGCTCATTCCTTCAGCTTCCCGATATCCGACGGTAGTGTNNNNNNNNCTCTCTCAATCTCTCTGT	645314	645339	+	0	417_0023
1:647203-647382/22,22/+	0.980106	1	647203	647224	1	GCTTGTTGTCCTTGACTGTAGG	647361	647382	1	GCCCACTATCAGAAGGAAGGGT	647225	647360	TTCTGAGCAGTTCATAAGATGGTGATTGAAAGCAAAGCCAACCACTTTCTCCACACCTATTAATCATATGGTTTTCGATTAGACAAATAACCAGATGCTCAAGAAAGAAAGAAAGAAAGAAGGAAAAGTTAAAGAT	GCCCACTATCAGAAGGAAGGGTCTTCAGCTTCCCGATATCCGACGGTAGTGTNNNNNNNNGCTTGTTGTCCTTGACTGTAGG	647325	647350	+	0	418_0024
1:693384-693563/17,26/-	0.981195	1	693547	693563	1	GGCATGTCTGATGGTTG	693384	693409	1	GCGGTTGTAATGGCAGTGAATGTACG	693410	693546	AATTCAGACGAAACCCTCTCTTTCCTGTGAAAGCTGGCTTCAATTCTCCGACTGTAACAAGTCCCATCTCTCTCTATTCTCGTAGCAGAAGAAGAAGGAGAAGAAGAAGAAGAAGAAGAAGAAGAAGAAGAGCTCTT	GCGGTTGTAATGGCAGTGAATGTACGCTTCAGCTTCCCGATATCCGACGGTAGTGTNNNNNNNNGGCATGTCTGATGGTTG	693416	693460	-	0	441_0025
1:808543-808722/16,29/-	0.961828	1	808707	808722	1	TGGTTGCAAGGTTGTT	808543	808571	1	GGGCGGCACCTAGAAGCAACATCTTCCAA	808572	808706	AGCTCGTTCATGTTTGAGACCAAATCAGTACTTAGAGCACGGGTATTGTGGTCACGGGTAACAACCAGGGGAAGAGTTTCTGAAGAAGAAGAAGAAGAAGAAGTGCTGGCCTTTGAGCCAGAAGCTCCAAGAAAA	GGGCGGCACCTAGAAGCAACATCTTCCAACTTCAGCTTCCCGATATCCGACGGTAGTGTNNNNNNNNTGGTTGCAAGGTTGTT	808604	808625	-	0	538_0026
1:863946-864125/17,26/-	0.980561	1	864109	864125	3	CCAAAAAAAAGAAAGTA	863946	863971	1	GGACAAGTTCCGAAGCACATGACGGA	863972	864108	AATAAATAAATATTCAGGAAGAAAAAGCCTGTAGAGAGAGAAGAAGAAGAAGAAGAAGAAGAAGACGACGAAGTCGAGAGAAAGAAATAATGGCGGAGGAGACGATGGAGAACGAAGAGAGGGTGAAGCTGTTCGTC	GGACAAGTTCCGAAGCACATGACGGACTTCAGCTTCCCGATATCCGACGGTAGTGTNNNNNNNNCCAAAAAAAAGAAAGTA	864036	864074	-	0	571_0027
1:867647-867826/17,28/-	0.980096	1	867810	867826	1	AATACCATACGTGGCAA	867647	867674	1	CGGCGCCGTTTATTTATTGTCTATCTTG	867675	867809	TATGCGATTGGTTAAGACAGTTAATGTCAATGATAAAAGACTCTGAACTCTCAAGTCCGAAGACAGAAGAATACTAAACTCCTTAAAATTGCTCTCAAGGCGGAGAAGAAGAAGAAGAAGAAGAAGAAGAAGAAA	CGGCGCCGTTTATTTATTGTCTATCTTGCTTCAGCTTCCCGATATCCGACGGTAGTGTNNNNNNNNAATACCATACGTGGCAA	867676	867706	-	0	576_0028
1:872681-872860/23,22/+	0.980281	1	872681	872703	1	CGGTTTTGCTAATGATGACCTTG	872839	872860	1	ACAATCCTAATGATGCCCTCGC	872704	872838	AGACGATGATGCTAGATGGAGAATAATCTCGCGAAGTTACTCAACAACAACAACAACAACAACAACAACAACAACGTCAAGAAGATTGTGACGTTACTCAAGAGCAAGAAAAAGATGATGTGATGGTACTGATAA	ACAATCCTAATGATGCCCTCGCCTTCAGCTTCCCGATATCCGACGGTAGTGTNNNNNNNNCGGTTTTGCTAATGATGACCTTG	872745	872778	+	0	582_0029
1:913106-913285/16,29/+	0.898274	1	913106	913121	1	CTTACATGGAATCGTG	913257	913285	1	GAAAGGAGTGAATATTTGGTTTAGGGCTA	913122	913256	TTAAAAAAAAAAAAATAATAATAATAATAATAATAATAACTTACATGGAATAAGTGTTGAATTGTTGATGAACAGTGTTTGTCCACAAATCTAGTAGGCGATAACTTTCAATAGGCTGAAATTGAATAAAACGAA	GAAAGGAGTGAATATTTGGTTTAGGGCTACTTCAGCTTCCCGATATCCGACGGTAGTGTNNNNNNNNCTTACATGGAATCGTG	913135	913160	+	0	610_0002
1:921336-921515/16,28/-	0.84012	1	921500	921515	1	GTAATTTCCTGGAATG	921336	921363	1	CCTTTGGAAGAAACAGAACGAGAAAGCT	921364	921499	TTTATATCTAAATTGTTATATATATATATATATATATTTTTGAACTGTCAAGATAGAAAGAAGTTGAATGTAATTAAAGAGGTAATATAATTAATTACCAGGTCCAACACAACTACGAACTTCCATAATAAACTCT	CCTTTGGAAGAAACAGAACGAGAAAGCTCTTCAGCTTCCCGATATCCGACGGTAGTGTNNNNNNNNGTAATTTCCTGGAATG	921463	921483	-	0	613_0030
1:923854-924033/16,29/-	0.980311	1	924018	924033	13	CACAAAAAAAAACTAA	923854	923882	1	CGAGAGGGCGTATTCCGTAACAAACATGT	923883	924017	AAAGAGTAGTAGTAGTAGTAGTAGTAGTAGTAGTACTAGCCTCTACTTGGTTGTATTTGTCAATAGCCACATTGGCCATAATCTCCATGTAGTCACGCCCCGTCATGTTTGGCTTGAAGAAGGGGGCATCCAGAT	CGAGAGGGCGTATTCCGTAACAAACATGTCTTCAGCTTCCCGATATCCGACGGTAGTGTNNNNNNNNCACAAAAAAAAACTAA	923979	924013	-	0	616_0031
1:972943-973122/21,24/+	0.73248	1	972943	972963	1	CCATCTATACGTATTCTTGGG	973099	973122	1	GAAGACAAAGGTTAGATCCATACC	972964	973098	AAAATAAAATAAAAAGTACAAACTAAGCCATGAATAAATGTGTATACAATTATATATATATATATATATATATATATATATACTGTATTAAACGTATGCCTATAAAAAATAAAATGCAATAAACGACATTTCAAA	GAAGACAAAGGTTAGATCCATACCCTTCAGCTTCCCGATATCCGACGGTAGTGTNNNNNNNNCCATCTATACGTATTCTTGGG	973014	973045	+	0	653_0003
1:977460-977639/16,28/-	0.980074	1	977624	977639	1	TGCCGGGCAATAGCAT	977460	977487	1	GTGTTTGCAAGGAGAGGCTGTTGTTTGG	977488	977623	TTTCCTTTTAAAGAATGAAGATAAACCATCATCATCATCATCATCATTATCATGGTTAACATCAGGATCACCAAAGCCAACATCTATAAGCAATAAGAGATCAAGCAACCTAGTTGTGATGGAGAATGCTGTGGTG	GTGTTTGCAAGGAGAGGCTGTTGTTTGGCTTCAGCTTCCCGATATCCGACGGTAGTGTNNNNNNNNTGCCGGGCAATAGCAT	977571	977597	-	0	660_0033
1:987364-987543/16,28/+	0.871834	1	987364	987379	1	TGCGATTTGGAGTTTT	987516	987543	1	GCACGCAGAACGCTATGGTGCTACCGCA	987380	987515	AAACTCTAAATAATCTAAATCGTTTTCAATTGGTTTAAATATATATCTTGCAATTTTAATCGTTTTTAATTAAAAAATATATATATATATATATATCTTGCATTTTTAATCGTTTTCAATTTAAAAAATATATCTT	GCACGCAGAACGCTATGGTGCTACCGCACTTCAGCTTCCCGATATCCGACGGTAGTGTNNNNNNNNTGCGATTTGGAGTTTT	987456	987475	+	0	667_0034
1:1021926-1022105/16,29/+	0.981534	1	1021926	1021941	1	GAAAACAATGTAAAAG	1022077	1022105	1	CGTCGAAGAGGGACTGAGTTGTGTGAGAG	1021942	1022076	AAGAGCTCTCTCTCTCTCTCTCTCTCTCTCTCTCTCTATGAACTACCTAAAAAATGGAGCAATGCTTCACATATGAAGAAGAGTAACGTTCGCAGAGAAGTCTTTCATTTACTTCAAAATGCGGATTCAATAAAA	CGTCGAAGAGGGACTGAGTTGTGTGAGAGCTTCAGCTTCCCGATATCCGACGGTAGTGTNNNNNNNNGAAAACAATGTAAAAG	1021947	1021978	+	0	681_0035
1:1155385-1155564/19,21/-	0.951169	1	1155546	1155564	1	GGGTTTTTCCGGAAAGCGG	1155385	1155405	1	ACCTGGAGGAGGAGGAAGAGA	1155406	1155545	GAACTCAGACGTATCAGAGAGGAAAGATATTCAAGAAGCGGTTTGGCGACATTGCTATTCGAAAGAATACATGGAAGTTAGATTCGGATTCGAGGTAACTGCTGAAGGTGAAGAGAGTAGTAGTAGTAGTAGTGGTAGTA	ACCTGGAGGAGGAGGAAGAGACTTCAGCTTCCCGATATCCGACGGTAGTGTNNNNNNNNGGGTTTTTCCGGAAAGCGG	1155406	1155430	-	0	733_0036
1:1157502-1157681/16,29/+	0.981103	1	1157502	1157517	1	GAAAAGGAACATCAAA	1157653	1157681	1	GAATGTGTAGAGAGAGAGACAAGTTAGGG	1157518	1157652	CCCATCTCACATTTGAGAAATCATATACCTGCAACGTAGTGATCAGCCAAAAATCTCTTTTCCAGAAAACGTAAAAGCTGTAGAAGAAGAAGAAGAAGAAGTCTAAACGATTGTTGAATCTTACGAAACTCACCA	GAATGTGTAGAGAGAGAGACAAGTTAGGGCTTCAGCTTCCCGATATCCGACGGTAGTGTNNNNNNNNGAAAAGGAACATCAAA	1157599	1157618	+	0	734_0037
1:1157751-1157930/16,29/+	0.954476	1	1157751	1157766	3	GATTTACGTTTTGGTG	1157902	1157930	1	CTTCTTCTTCTTCTTCTTGACCTACGTGG	1157767	1157901	AGAGAGAGAGAGAGAGAGAGAGAGAGAGGGAGGAATTGGGGGGAGAGTGAAGAAGGAAAGGGGGGTGGGACCCAGAAACGGTACATGAAGAGAACATAGACGCTTTTCGTTTGGAACACAACACGAGCACGACAT	CTTCTTCTTCTTCTTCTTGACCTACGTGGCTTCAGCTTCCCGATATCCGACGGTAGTGTNNNNNNNNGATTTACGTTTTGGTG	1157766	1157798	+	10	735_0038_SNP_a
1:1166603-1166782/18,27/-	0.952235	1	1166765	1166782	1	GTGATTGACAAGATGCTG	1166603	1166629	1	GGACTAGTACCTGAACCCAATAGATGC	1166630	1166764	ATCAAGTTTGAACCTTTATTCCCAATTTAAAGCATTCACTAAAATTATACACACACACACACACACACCTTTCTTTGTTGTTTTTGTTTTTGGTACAAAGGAAATGGTTTACTTATTTGTCAAGATCTGACAATT	GGACTAGTACCTGAACCCAATAGATGCCTTCAGCTTCCCGATATCCGACGGTAGTGTNNNNNNNNGTGATTGACAAGATGCTG	1166697	1166716	-	0	740_0039
1:1300088-1300267/16,29/-	0.790709	1	1300252	1300267	5	GATTTCGTTTTTGTTG	1300088	1300116	1	GTTTGGTCAAGGGTTTTGAAAGATCTCGA	1300117	1300251	CACTGTCTAACTCTAAATAAGTCGGATATCAAAGTTAGTATATAGTAAAAAAAAAAAAAAGTTAGTATATATATCCAAGTGGTAAAACCCGTAAAATTAACATATATATATATATATATATATATATATATATGA	GTTTGGTCAAGGGTTTTGAAAGATCTCGACTTCAGCTTCCCGATATCCGACGGTAGTGTNNNNNNNNGATTTCGTTTTTGTTG	1300119	1300150	-	0	846_0040
1:1316480-1316659/16,29/-	0.981103	1	1316644	1316659	1	CAAACAAAGACCAGAG	1316480	1316508	1	CGAGATCATTGATGACACCGAATGTGGTG	1316509	1316643	TCTCATTCAAACGAATTAGACCAGAAATTACCCTGCATAACAACAACAACAACAACAACGAGAAACAAATTTCAAAATCAATTTTTTCTGCAAATGTTGATCACACAAATCAATTGTATATACATATATAAGCAA	CGAGATCATTGATGACACCGAATGTGGTGCTTCAGCTTCCCGATATCCGACGGTAGTGTNNNNNNNNCAAACAAAGACCAGAG	1316585	1316605	-	0	867_0041
1:1339346-1339525/16,29/-	0.823071	1	1339510	1339525	1	TGGGAGAAGTTGGTCC	1339346	1339374	1	GTGTTGTATTGAACTGTATAAACCAATTC	1339375	1339509	AGATGAGCGTTCTGAATTATTATATCTTTAAACAAACATATATACTGTATATATTTTTTTTGTGTTTCTTCGATCGACTTTGAGATAAAAAAAAATATATATATATATATATATATATATATATATATATTTAAC	GTGTTGTATTGAACTGTATAAACCAATTCCTTCAGCTTCCCGATATCCGACGGTAGTGTNNNNNNNNTGGGAGAAGTTGGTCC	1339380	1339415	-	0	875_0042
1:1365501-1365680/16,29/-	0.972369	1	1365665	1365680	1	GGAAATGTCGCTAAGA	1365501	1365529	1	GTTTCTTACTTGTCATGGTTTTTGGGATG	1365530	1365664	ATCCAGATGAGGAAAAATTCCGGAAAATTAGACTCACCAACCAAACATTTCAGGTAAACAATCGGGCATAAAAATACGCATCTAGATCTACTTGAAGGATCTACACTGATGATGATGATGATGATGATGGGTCCA	GTTTCTTACTTGTCATGGTTTTTGGGATGCTTCAGCTTCCCGATATCCGACGGTAGTGTNNNNNNNNGGAAATGTCGCTAAGA	1365536	1365558	-	0	895_0043
1:1505662-1505841/19,25/+	0.980566	1	1505662	1505680	1	AAGAGAAGTTTCCATGGCG	1505817	1505841	1	GCTCTGTGAATGTTGGAGCTCTGTT	1505681	1505816	AAAGCAATCAGAGTTGTGTTGTTATGTGTTTCTGTCTTGTGGGTTGTTCCAAAGGAATGTGCTTGTAGAAGTAATTTCTCTAGAAACTCGTCTTCTTCTTCTTCTTCTTCTTTGCGGCCATTAAGACAGAGGCCAA	GCTCTGTGAATGTTGGAGCTCTGTTCTTCAGCTTCCCGATATCCGACGGTAGTGTNNNNNNNNAAGAGAAGTTTCCATGGCG	1505771	1505792	+	0	966_0044
1:1643162-1643341/17,28/-	0.914767	1	1643325	1643341	1	CAAGTTACTCTTTAAAG	1643162	1643189	1	TAACAAGACGTGTAGGCGTCTAGCATCA	1643190	1643324	AATAAAAAAAAAAAAAAATATATATATATATATATATATATACTGCATAAAGAATGGGGAAACTAGGAGTAGTGAACAAGAGAGAAAAAGACATTTTGGGGAAAAAAAACATGAAGCTCAGAGTCGAAACATTAA	TAACAAGACGTGTAGGCGTCTAGCATCACTTCAGCTTCCCGATATCCGACGGTAGTGTNNNNNNNNCAAGTTACTCTTTAAAG	1643283	1643307	-	0	1071_0045
1:1682105-1682284/27,18/-	0.982301	1	1682258	1682284	1	TTGTTGGTTTCCATGAGTCTTCTTCTT	1682105	1682122	1	CAGTCCTTGTCACGTTCC	1682123	1682257	CAGAGAGCTTCTCAAGAGAAACAACAACAACAACAACAACAAAAAAACGAATGTTTTTGTTTTGTGATTCTCCAAGGAAGACGCAGTCAAAGTTGAGAGAGAGAGAGACAGATAATTATTATATATTTATACTCT	CAGTCCTTGTCACGTTCCCTTCAGCTTCCCGATATCCGACGGTAGTGTNNNNNNNNTTGTTGGTTTCCATGAGTCTTCTTCTT	1682216	1682238	-	0	1088_0046
1:1720740-1720919/16,29/-	0.946649	1	1720904	1720919	1	TAGCGAAACTCAAAAG	1720740	1720768	1	GAGAGCTGCGACTGACCAGATGCATTTAC	1720769	1720903	TAAAACTAATTAACTTTTCTGCCCTAGTTTGTTAAAAGATATAGCAATACTTGTACTAAATGATTGTAGAAATATATATATATATATATATATATATATACCAGAAGGGTGAAACTGATATGTTCTTGAATAGGA	GAGAGCTGCGACTGACCAGATGCATTTACCTTCAGCTTCCCGATATCCGACGGTAGTGTNNNNNNNNTAGCGAAACTCAAAAG	1720804	1720832	-	0	1111_0047
1:1807548-1807727/23,21/-	0.981063	1	1807705	1807727	1	TATTGGCGCCTATTCGAATTTCC	1807548	1807568	1	CTAGGGTTTTCCTTTCCCGGT	1807569	1807704	CACTAACTAAACAATAATAATAATAAATGGAAATGAAAAACACGAAGTTTAGATGATCTTGAGAGAGAGAGAGAGAGAGAGAGCTGACACATATCACTCTCTCTCATTTACCAAAAACGGTAATTGGAGAACAAAT	CTAGGGTTTTCCTTTCCCGGTCTTCAGCTTCCCGATATCCGACGGTAGTGTNNNNNNNNTATTGGCGCCTATTCGAATTTCC	1807622	1807644	-	0	1153_0048
1:1837443-1837622/21,19/-	0.989402	1	1837602	1837622	1	AGGATCCTTTAATGGGAGAGA	1837443	1837461	1	GCTTTGGATTCTGGAGGCT	1837462	1837601	GAATGTTCTACTTCTTCTTCTTCTTCTTCTTCTTCTTCTTCCTCCTCTCTCGTCGGATCTCTCTGATTTAGTGATTTTTCAAATTTCAAGTTTTCTTCACCTTTAATTTTGTGTCTCGTTGATCTCTCTTTGGACATTCT	GCTTTGGATTCTGGAGGCTCTTCAGCTTCCCGATATCCGACGGTAGTGTNNNNNNNNAGGATCCTTTAATGGGAGAGA	1837561	1837596	-	0	1175_0049
1:1862053-1862232/16,29/+	0.918194	1	1862053	1862068	3	AAGTCAAAGTCAAAGA	1862204	1862232	1	GGCCTACACTCTACAACCAATTTTACGTG	1862069	1862203	TATATATACATACATATACAAGCTAGTGAGGATGATCCCAAAGTCAAGCCATGAGGTGTTGACCAATAACTCTACATATATATATATATATATATATATATAGACTTAAAATGAAACCCCATGCAAACAAAAAAA	GGCCTACACTCTACAACCAATTTTACGTGCTTCAGCTTCCCGATATCCGACGGTAGTGTNNNNNNNNAAGTCAAAGTCAAAGA	1862144	1862170	+	0	1184_0050
1:1891862-1892041/16,28/+	0.967477	1	1891862	1891877	1	AAATTCATCACCATCA	1892014	1892041	1	CTAGGTCTGGACCCACATTCAATCAGCC	1891878	1892013	ACTAAACTAAACTAAACTAAACTAAACTAAGCCAAATAATGGTCCTCAACCAATGAGAAGCACAAAATGTAAAAAACGTGGTTGACAAGTGACAACTAAACCAGAGAGTGGTGATGATTTTTATCAAGTACCCTGG	CTAGGTCTGGACCCACATTCAATCAGCCCTTCAGCTTCCCGATATCCGACGGTAGTGTNNNNNNNNAAATTCATCACCATCA	1891877	1891907	+	10	1206_0051_SNP_a
1:1958929-1959108/16,28/-	0.987421	1	1959093	1959108	11	TTCTTCTCTTTCTCCT	1958929	1958956	1	GCTCATCAGTCAGTCACATTATTACTCC	1958957	1959092	TCAGCCAACGTTCCTGAAGCTGAAGAATGGAGACGTAGTTAGCCGGAATCAAAGCCACACTCTTCTTCTTCTTCTTCTTCCCATCAATCTTCTCATGATCCTCCATTGATTCTTTTTTTGTTTTTTACTTTGAAAA	GCTCATCAGTCAGTCACATTATTACTCCCTTCAGCTTCCCGATATCCGACGGTAGTGTNNNNNNNNTTCTTCTCTTTCTCCT	1959013	1959032	-	0	1243_0052
1:1974140-1974319/19,26/-	0.974654	1	1974301	1974319	1	CGTGACATGACTCTGTAGT	1974140	1974165	1	TTTTCAACGTCGTCTTCGTCTTCGTC	1974166	1974300	AGAGAGAGAGAGAGAGAGAGGTAGACAATGGGAGTTATGAAGAAGTGGGCGTCGCTGAAGAAGAAGAAGCTGCAACAAGAGGAGGAACAAGTGACGGCTAAAGAAACACAGACATGGCAGCGATTAAGGAATCTG	TTTTCAACGTCGTCTTCGTCTTCGTCCTTCAGCTTCCCGATATCCGACGGTAGTGTNNNNNNNNCGTGACATGACTCTGTAGT	1974281	1974300	-	0	1251_0053
1:2052068-2052247/16,26/+	0.981538	1	2052068	2052083	2	GAAAAGGAGGAGGAGA	2052222	2052247	1	CTGACATTGGTTTTCTCTTGGGCTTG	2052084	2052221	AGCCAAGAAGAAGAAGAAGAAGAAGAGGTTTGGGCACTGCGAGAGGTGAGAGACTGTGGATATGGACACGTATGTTGTTGGCGGGCCAAACAATTCTTTAATGAATAACCGGTGAAATTCAAAAACAAAAAAACAAAA	CTGACATTGGTTTTCTCTTGGGCTTGCTTCAGCTTCCCGATATCCGACGGTAGTGTNNNNNNNNGAAAAGGAGGAGGAGA	2052088	2052109	+	0	1298_0054
1:2055100-2055279/16,29/+	0.981687	1	2055100	2055115	16	AAAAGAAGAAAAGAGA	2055251	2055279	1	CGAAGGGAGAAATAGGAAATGGCCAAAAA	2055116	2055250	AAAAAATAACCGGTCTGAGACACCTACAAAACTCGCTTGTCCCTCTCAATCTCTCAAGGATTCGTCGCGTAAGATCGTCTCCTCTGCGATGATGATGATAGAGAGAGAGAGAGAGAGAGGGTTGCTTGATGGAGA	CGAAGGGAGAAATAGGAAATGGCCAAAAACTTCAGCTTCCCGATATCCGACGGTAGTGTNNNNNNNNAAAAGAAGAAAAGAGA	2055215	2055234	+	0	1302_0055
1:2105051-2105230/17,28/-	0.890121	1	2105214	2105230	1	TTTTAAGAGAATCTGAG	2105051	2105078	1	GAAATGAAATGAAGAGCGTAGGAGAGAA	2105079	2105213	AGATGAATGCTTTGGTTGTGTGAATAATTATGATTATTATTCGCAATTGAGAACAATGTCAATGGAGATAATGATGGAGATGAAGAAGACGAAGCTCTTTCTCTCTCTCTCTCTCTCTCTCTCTCTCTATCAAAT	GAAATGAAATGAAGAGCGTAGGAGAGAACTTCAGCTTCCCGATATCCGACGGTAGTGTNNNNNNNNTTTTAAGAGAATCTGAG	2105086	2105119	-	0	1320_0056
1:2156626-2156805/17,28/-	0.982407	1	2156789	2156805	5	AAAAGCAAAAACAAAAG	2156626	2156653	1	GTCACTAGGGTTTCATTGAGCCATGTGT	2156654	2156788	TAGACAATCAAGGCATAAATATAAACAAAATGATTTTAAGATGTGTGTAACTAACTAATCGACCAGGCCAGACATAGCCTATGATCTTCTTCTTCTTCTTCTTCTTCTTATAACTTATCTGGTCATGTGCAGCAT	GTCACTAGGGTTTCATTGAGCCATGTGTCTTCAGCTTCCCGATATCCGACGGTAGTGTNNNNNNNNAAAAGCAAAAACAAAAG	2156680	2156704	-	0	1354_0057
1:2164991-2165170/16,29/-	0.980858	1	2165155	2165170	1	GAAGGGAAAACAAAAC	2164991	2165019	1	GATGATTTCGAGAGCATTTTCGACATCAC	2165020	2165154	AGAGAAAAAGATAAGAGATATATGGATACACAAAGGTTGCCGAAGAAAGAAGAAGAAGAAGAAGAAGATCATCTACTTTCTTCAACCTTCGAGTCCATCAATGGTCACTCTCGAGACCAACACAATCATTCTATA	GATGATTTCGAGAGCATTTTCGACATCACCTTCAGCTTCCCGATATCCGACGGTAGTGTNNNNNNNNGAAGGGAAAACAAAAC	2165087	2165113	-	0	1360_0058
1:2248176-2248355/17,28/+	0.955358	1	2248176	2248192	5	GTGGTGGAGGAGGCGGA	2248328	2248355	1	GGGGAGTAATAATGGTTTCCTTGAGGGG	2248193	2248327	TAATAATACCCGGAATAGTAGTGATCAGTGAATGCGTAAGGAGACGGAGACGGTGACTGTGAGAATTCTCTGTAGTCACGCTGAGGAGATGGAGCGGTGATCGGTGCTTGAGGAGGAGGAGGAGGAGGAGGGCTA	GGGGAGTAATAATGGTTTCCTTGAGGGGCTTCAGCTTCCCGATATCCGACGGTAGTGTNNNNNNNNGTGGTGGAGGAGGCGGA	2248302	2248323	+	0	1400_0059
1:2277830-2278009/18,25/-	0.981904	1	2277992	2278009	1	GGAAGCAGGATTAGATAG	2277830	2277854	1	GTGGGAGAGGAGCCACGAGTGAAAC	2277855	2277991	ATGAGATTATGATGAAGAAAGAGAGAGAGAGAGAGAGAGAGAGAGAGAGTACCTGCCAACCAGATTCCACGAAGGAAGCCATGGATGGATCTATGAGAGACAGATGGGAAGAGATGTAGAAGAAGAAGAAGAAAGAG	GTGGGAGAGGAGCCACGAGTGAAACCTTCAGCTTCCCGATATCCGACGGTAGTGTNNNNNNNNGGAAGCAGGATTAGATAG	2277943	2277976	-	0	1415_0060
1:2286797-2286976/17,27/-	0.98141	1	2286960	2286976	1	CAAGAAAACAAAAACAC	2286797	2286823	1	CATAGGGGCATTGAATCAGCTAGCAAG	2286824	2286959	ATCTCTGTTTGAGACTTTCAATAGAAGTTTTTGTTTTTACTTACAATAGTTTTCACATGTAAATGCAAAGTCATAAACTGGTTTTTGAAACAATGAATCATAGGCCATGTGTGTGTGTGTGTGTGTGTGTGTGTGT	CATAGGGGCATTGAATCAGCTAGCAAGCTTCAGCTTCCCGATATCCGACGGTAGTGTNNNNNNNNCAAGAAAACAAAAACAC	2286824	2286852	-	0	1418_0061
1:2300880-2301059/16,28/+	0.944052	1	2300880	2300895	1	TTTGTGGTGTAGGCGA	2301032	2301059	1	ACAGCATAAACATTGCAAAAGCCATATG	2300896	2301031	ATTTTCTAATCTACTAGCATGATGCAACTTTATTGACCAGATTATTATCATCATCATCATCATCATAATTGTAAATCCATGACATTAACTAGACCCCATTAAGATATTGTTTCCAAGTCTAATCACGGCTATAAAA	ACAGCATAAACATTGCAAAAGCCATATGCTTCAGCTTCCCGATATCCGACGGTAGTGTNNNNNNNNTTTGTGGTGTAGGCGA	2300942	2300961	+	0	1424_0062
1:2315899-2316078/19,26/+	0.959663	1	2315899	2315917	1	GCGTCATCAGATGAAGATG	2316053	2316078	1	GGTTTGAGGAGGGAGGCAAATCAAAG	2315918	2316052	ATAACAGATCTCCTGCTACAGCTTTGTTGTTGATGTTGTTGTTGTTGTTGTTCTGGGAGGGATATGCCTCTGGAGGATCCAAGGATGAGAAATCTAAGTCATCTAAATAGAACCCATTAGCTAAACCTAAGGTTT	GGTTTGAGGAGGGAGGCAAATCAAAGCTTCAGCTTCCCGATATCCGACGGTAGTGTNNNNNNNNGCGTCATCAGATGAAGATG	2315941	2315969	+	0	1436_0063
1:2345517-2345696/16,29/-	0.979617	1	2345681	2345696	1	AAACGGATTTAGAGAA	2345517	2345545	1	GAAGGTGGTGACTTGCGTTCGAAGAGCTT	2345546	2345680	ATCAAGAAGTTGCTCAAAAATACACTCAAAGACCGAAATCGCACAAAGAAGAAGAAGAAGAAGAAGGTTTTGGATGTTGCGAAAGATGATTATGTGGGGAGATATTCTCAACTCTTGAAGCAGATTTCTAGAAGA	GAAGGTGGTGACTTGCGTTCGAAGAGCTTCTTCAGCTTCCCGATATCCGACGGTAGTGTNNNNNNNNAAACGGATTTAGAGAA	2345615	2345635	-	0	1453_0064
1:2392686-2392865/16,29/+	0.976245	1	2392686	2392701	1	AGGTGTAGAAAAGTGG	2392837	2392865	1	GGGGCATTCAAGCAGTACTGTGTTTCCGA	2392702	2392836	ACGAGGACTTCGCCTGTCTATTTAAGTATTTATTAAATTTATTACAGCCAGGAAGTTCACACACACACACACACACACACACACACATGCACCATCGAGTTATTGTGGATCAGTGGATAGACATATTGTATGGGA	GGGGCATTCAAGCAGTACTGTGTTTCCGACTTCAGCTTCCCGATATCCGACGGTAGTGTNNNNNNNNAGGTGTAGAAAAGTGG	2392759	2392788	+	0	1481_0065
1:2482509-2482688/16,28/+	0.984715	1	2482509	2482524	1	GAATGGGTCGGGTGGG	2482661	2482688	1	CGGGTCAGAAAGATCGTTATTTGAGAAG	2482525	2482660	GAGAACCATCTGATATGCAAGCGAGTGGCACCGGTCTGAACCCATTTATCGATGATGATGATGATGATGACAGCAAGCACATAATGAACCTCGACATACCAATGGCTGAGGTCAAATCTGAATCCATGATTCCAAA	CGGGTCAGAAAGATCGTTATTTGAGAAGCTTCAGCTTCCCGATATCCGACGGTAGTGTNNNNNNNNGAATGGGTCGGGTGGG	2482575	2482594	+	0	1510_0066
1:2625503-2625682/16,27/-	0.954151	1	2625667	2625682	1	ACATGGCAAACTCAAG	2625503	2625529	1	GCATGGTACGTACTTGGAGTCATCATG	2625530	2625666	TTCAACATCTGGACTTCCTTCCACTTCTCGAACTTTAGCTCCTCCTAAACCTTCGGAAGATAAGGTACTCATCATCATCATCATCATCATCATCATCATCATCACTTTTTAAAATTTAATTTTAGAAAGAGATATAT	GCATGGTACGTACTTGGAGTCATCATGCTTCAGCTTCCCGATATCCGACGGTAGTGTNNNNNNNNACATGGCAAACTCAAG	2625563	2625598	-	0	1591_0067
1:2668140-2668319/16,29/-	0.978974	1	2668304	2668319	1	GGTATGGAGACAGGAG	2668140	2668168	1	GCCGAATCCACGTGATTATATGGATGATT	2668169	2668303	GAGGCGTTACAAACGGGTAAGTACTTATTTGAGTCCAAATGAATTATAACCTTCTCAACTCTGTTTTATCTGGAAACCAAGTGAGTGAATATTGTTGGAAATGGTTTGTTTTGTTTTGTTTTGTTTTGTTTTGCA	GCCGAATCCACGTGATTATATGGATGATTCTTCAGCTTCCCGATATCCGACGGTAGTGTNNNNNNNNGGTATGGAGACAGGAG	2668171	2668199	-	10	1612_0069
1:2677506-2677685/16,28/-	0.97249	1	2677670	2677685	1	AAGGAGAAGACAGTCA	2677506	2677533	1	GTGGTCAAGATCGGCCATGATTTAACAG	2677534	2677669	TGTTAGAAAACGACGTGACCTTAACAACAGCCCATAAAGTCCTTCATATGTGATGGTACCATCTTTTTATTATAATCGTCTTATATTTTTGTGTGTGAGCGAGAGAGAGAGAGAGAGAGAAAGGATCCAATCCTAA	GTGGTCAAGATCGGCCATGATTTAACAGCTTCAGCTTCCCGATATCCGACGGTAGTGTNNNNNNNNAAGGAGAAGACAGTCA	2677550	2677573	-	0	1617_0070
1:2691375-2691554/16,29/+	0.976534	1	2691375	2691390	5	AAGAAGAACCAAAAAA	2691526	2691554	1	GTTGTTGTGTTTTCTTTTTCTTACGGTGC	2691391	2691525	AGAAATATACAAAGGGTTGGTGGCCGAAACTTTTGTGAGGAGGAGGACATGAAATGGTGGTGGTGGTGGTGGTGGTTGCAAGCAAGCAAGGTGGTAGTAGCAGATATAGTTACAAGGGGATTCAAATGAGCCATT	GTTGTTGTGTTTTCTTTTTCTTACGGTGCCTTCAGCTTCCCGATATCCGACGGTAGTGTNNNNNNNNAAGAAGAACCAAAAAA	2691445	2691466	+	0	1625_0071
1:2770871-2771050/16,29/+	0.982221	1	2770871	2770886	1	CAGGAATTGAGAAATG	2771022	2771050	1	GGTACCTAAGACAAAGAAGGCAGAGAAAC	2770887	2771021	CTGGATTATCGATAGGAAAATTGCACCTCCCATCGTACCTGAGATAAAGAATCAACAATGAATTCGAGTAAACCCTAAGAAGAAGAAGAAGAAGAAGAAGAAGAAGAAGAAGAAGTGAATGAGGAAACAAAAATT	GGTACCTAAGACAAAGAAGGCAGAGAAACCTTCAGCTTCCCGATATCCGACGGTAGTGTNNNNNNNNCAGGAATTGAGAAATG	2770963	2771001	+	0	1661_0072
1:2773995-2774174/24,21/+	0.980083	1	2773995	2774018	1	TTTTTAACTCGCCGGCTAAGTTTC	2774154	2774174	1	TGCAGCTCCTCCATCGGATCA	2774019	2774153	CGTCACTCCCACCACTTTTTTGATTGACCAAAGGAAGAAGAAGAAGAAGAAGAAGAATCTGAAGAGAGCGATGAAGCATATTTTCAAGAAGCTACACAGAGGTGGGAATCAAGAGCAGCAGAATCGAACCAACGA	TGCAGCTCCTCCATCGGATCACTTCAGCTTCCCGATATCCGACGGTAGTGTNNNNNNNNTTTTTAACTCGCCGGCTAAGTTTC	2774052	2774075	+	0	1665_0073
1:2989273-2989452/19,24/-	0.982653	1	2989434	2989452	9	CAATCTCTTCTTCTTCTTC	2989273	2989296	1	GCCCTTATTTACCGGTATTTGTTT	2989297	2989433	AGATTCTGAGAGTCTCTCTTTCTCTCTCTCTCTCTCTCAATGTGACTAGTTAGAAACAAGAGAAGATGAATGGAGAGAGATCAGTTTTTATATCTCTGCCAATCGCCAGCGGAGCTATAACACTTAATTCCACTTTT	GCCCTTATTTACCGGTATTTGTTTCTTCAGCTTCCCGATATCCGACGGTAGTGTNNNNNNNNCAATCTCTTCTTCTTCTTC	2989396	2989421	-	0	1756_0074
1:3058991-3059170/16,29/+	0.962948	1	3058991	3059006	1	TTGCTGGAAAGGGAGA	3059142	3059170	1	GGAAAGTTGAGAGACATCATTCCGGTCCG	3059007	3059141	TAATATGTATGGATACAGTATGTTTGAGTTATATTATATATATATATATATATATATATATATATTAAAACATAAAAAAACAAATGTACTTTTAGTGTTTTCATATAATACCTTTTTAATAGTATTACCAAATAT	GGAAAGTTGAGAGACATCATTCCGGTCCGCTTCAGCTTCCCGATATCCGACGGTAGTGTNNNNNNNNTTGCTGGAAAGGGAGA	3059036	3059071	+	0	1799_0075
1:3108097-3108276/17,28/-	0.940091	1	3108260	3108276	1	GAAGAAAACGAATTGAA	3108097	3108124	1	ATGAGAGATTTTAGGGAAATGAGGTTTC	3108125	3108259	ATCAAAGAATCAAAGGAAGACTTGTGGGTTAGAGAGAAAGAGATATGCTGAGATTAATGGAGAGAGAGAGAGAGAGAGAGAGAGAGATTTGGAATTGTGAGTGATTCCTGAAATTACGAAGAGCCTATCAAGAAT	ATGAGAGATTTTAGGGAAATGAGGTTTCCTTCAGCTTCCCGATATCCGACGGTAGTGTNNNNNNNNGAAGAAAACGAATTGAA	3108173	3108200	-	0	1830_0076
1:3126163-3126342/20,25/+	0.977614	1	3126163	3126182	2	TCCAGATGTTCTCATGGTCT	3126318	3126342	1	GCTGTGACGGTCTCGTTTGTCTCTT	3126183	3126317	CCCGTTGTGCTGATATTAATTCGGAAATAGAAGCTCTTACTACATTGGTGTTGGGTTCATCATCATCTGTCAAGATCCCTACTCCTTGGGAGGAGGAGGAGGAGGAGGACAAAGAATACTCTGTTTCCCAGGATA	GCTGTGACGGTCTCGTTTGTCTCTTCTTCAGCTTCCCGATATCCGACGGTAGTGTNNNNNNNNTCCAGATGTTCTCATGGTCT	3126271	3126291	+	0	1840_0077
1:3139937-3140116/16,26/+	0.980026	1	3139937	3139952	3	TCCAAGAAGAAAGAAG	3140091	3140116	1	CACCAGAGGAAACATCAGTGGAGGTC	3139953	3140090	TGAGTAAAGAACAGAAGAAAGGGGAAAAAGCATGATCTGGTTTCAAAATTAAAACCCGGAAAAAACAACCCATGAATGTTGAATTAGAGATAATGCAGACATGATGGTGAAGAAGAAGAAGAAGAAGAAGAAGTAATT	CACCAGAGGAAACATCAGTGGAGGTCCTTCAGCTTCCCGATATCCGACGGTAGTGTNNNNNNNNTCCAAGAAGAAAGAAG	3140061	3140085	+	0	1848_0078
1:3146828-3147007/16,29/+	0.975146	1	3146828	3146843	1	TGGGAATGAGATGAAG	3146979	3147007	1	GCGTTCTGCTAAAGCACGGTATGAACGAA	3146844	3146978	ATGCTTAGGTGGTTTCTTGGGATTATCATCATCATCATCGTCATCATCATCAACAAGAGGAAATGGAACATGTTCAGGGAAAGCGGTAGCGATCATATGATTGGCACTTTGAAGTTCTGTGGACAAATGATCATA	GCGTTCTGCTAAAGCACGGTATGAACGAACTTCAGCTTCCCGATATCCGACGGTAGTGTNNNNNNNNTGGGAATGAGATGAAG	3146868	3146895	+	0	1855_0079
1:3173585-3173764/16,29/-	0.972899	1	3173749	3173764	1	GTTGGAGACGCAAGAA	3173585	3173613	1	GCGTTAAGGGGAATTGAGATTGGCATGGT	3173614	3173748	GTGACCATCCTGAGGCATCGCTGGCGAATTCCGGTAAGGGAAACAGTGGTTGAAGGAATCGGAGAGAAAAGAGGGGAAGAAGGTACGAGAGAAGAAGAAGAAGAAGAAGAAGAAGGAGACGAGTATTGTAGAGTG	GCGTTAAGGGGAATTGAGATTGGCATGGTCTTCAGCTTCCCGATATCCGACGGTAGTGTNNNNNNNNGTTGGAGACGCAAGAA	3173630	3173659	-	0	1859_0080
1:3212229-3212408/25,20/-	0.933902	1	3212384	3212408	1	GTTCACATGTTCTTATGTTTTACTT	3212229	3212248	1	GCCTCGTCTCTACAACTTCG	3212249	3212383	TTTGCCTCTTGTCATTGTCCCACTTCAAAGTTTTTGTATGAGTAAAAGATTCTTATTAGTTGAAAACCTATATAATGATGTTGTCATAATATAAAACAAGGACTCTTTCTTTCTTTCTTTCTTTCTTTCTTACTT	GCCTCGTCTCTACAACTTCGCTTCAGCTTCCCGATATCCGACGGTAGTGTNNNNNNNNGTTCACATGTTCTTATGTTTTACTT	3212249	3212280	-	0	1870_0081
1:3217939-3218118/16,26/+	0.988494	1	3217939	3217954	1	CTCCAAAAAAGACAAA	3218093	3218118	1	GCTTTTAGTTTTGTGGGGGAAGATTC	3217955	3218092	ACAGTGCCATATCCTTTCGCTCACTGGCTTAAACCCGCCTCCTCTGTTCTTCTTCTTCTTCTTCTTCCTTCTCTCACTCGAAAATTTCTTATTAGATGTCTTAAAACTTTAGTTTAATTTGTCTACTTTCGAACTTTG	GCTTTTAGTTTTGTGGGGGAAGATTCCTTCAGCTTCCCGATATCCGACGGTAGTGTNNNNNNNNCTCCAAAAAAGACAAA	3218001	3218026	+	0	1873_0082
1:3252225-3252404/17,28/-	0.916182	1	3252388	3252404	1	GGAGAGAAGAAGTGGTG	3252225	3252252	1	GCCGCTTTGAAGCAAAGTTCTTCTTATC	3252253	3252387	ACGGTGGTTTGAGTTGATCGGAAACTTGTTTTTTCACATCGGGAAATTTGGTTAGAGGAGAAGAGAGAGAGAGAGAGAGAGAGAGAGAGAGAGAGAGAGAGAGAGAGGCGGGCGCGAGAAAAAAGCTTAAGCTTT	GCCGCTTTGAAGCAAAGTTCTTCTTATCCTTCAGCTTCCCGATATCCGACGGTAGTGTNNNNNNNNGGAGAGAAGAAGTGGTG	3252281	3252334	-	0	1888_0083
1:3299735-3299914/19,26/+	0.977829	1	3299735	3299753	1	ATCAACTTCCTATCTCCAG	3299889	3299914	1	CTATGCTTCATGACGTCACTCTCGGG	3299754	3299888	GACACACACACACACACACACAAAAAAAAAGATGAGGTTAGACACTAGGAAACATATAAGAACAATTATTACTTAGATGAGTACCTAGCATTCCATGCAGTTCCAAAGTCTGAGCTCAACAGCAAAACAGATTGG	CTATGCTTCATGACGTCACTCTCGGGCTTCAGCTTCCCGATATCCGACGGTAGTGTNNNNNNNNATCAACTTCCTATCTCCAG	3299755	3299775	+	10	1914_0084_SNP_a
1:3347336-3347515/21,24/+	0.953477	1	3347336	3347356	1	TTTACCTTCGAAGCTTTTCTC	3347492	3347515	1	TAGACCAATCAGTTTCCATAGCCA	3347357	3347491	AAGACTTCCAGTTCTCTTGAAGTTTTGATCGAAATGTGGTCTGCAGTAGAGAACTCCTTCAAAGGAGTTGTAATTGCTAAGCTGACTCATCAAGAAGAAGAAGAAGAAGAAGAAGAAACAGAACAGTCAAATCTT	TAGACCAATCAGTTTCCATAGCCACTTCAGCTTCCCGATATCCGACGGTAGTGTNNNNNNNNTTTACCTTCGAAGCTTTTCTC	3347448	3347473	+	0	1937_0085
1:3405560-3405739/16,29/+	0.98173	1	3405560	3405575	1	CAAGTGATCAAGAACA	3405711	3405739	1	GTACGTTGCCGGAGGAAGAGTGGTTTGCG	3405576	3405710	TAATAGCTCGAGCCGTCGAAGCAGTTTCAGCCACTGGACTCGACCCTTATAGGTACGTATTTATTATCCGTTACAAACATAAACATACGTATGTATGATGGTTTGATGATGATGATGATGATGGATGATGAAACA	GTACGTTGCCGGAGGAAGAGTGGTTTGCGCTTCAGCTTCCCGATATCCGACGGTAGTGTNNNNNNNNCAAGTGATCAAGAACA	3405679	3405706	+	0	1984_0086
1:3419593-3419772/16,28/+	0.967599	1	3419593	3419608	1	CGGAAAGTCAATAAAA	3419745	3419772	1	CGGATCTGATTAAGTACGTCGGTAGGAG	3419609	3419744	TGAGAGAAAAATATCAACGAAGAAGAAGAGGAAGAAGAAGAAGTAGTTAAAGAGTTATTTTATCTCTTCGTTCTTTTGTTTGTTTTGTTTTTCTCTCTTTTAATTTGAACCATTGAATTAAACCGAGTTCTTAAAC	CGGATCTGATTAAGTACGTCGGTAGGAGCTTCAGCTTCCCGATATCCGACGGTAGTGTNNNNNNNNCGGAAAGTCAATAAAA	3419627	3419651	+	0	1999_0087
1:3519750-3519949/19,26/+	0.702142	1	3519750	3519768	1	GTTTGGTAGTTGGATCTGG	3519924	3519949	1	CAAATAGAAAAATAGATGGTTCTCGG	3519769	3519923	TTTTGATATATAACAAATTTGATCCAGAAATTACAAAAACGAAAAAAAAAAAAAAAAAAAAAAAAGATATATATATATATATATATATATATATATATATATATATTGTGATTTTTTTAGAATATTTGAGTATTTGATGATCAAGCCACAAAAAT	CAAATAGAAAAATAGATGGTTCTCGGCTTCAGCTTCCCGATATCCGACGGTAGTGTNNNNNNNNGTTTGGTAGTTGGATCTGG	3519835	3519874	+	0	2045_0001
1:3527205-3527384/16,24/-	0.960159	1	3527369	3527384	1	GGGAGACAGAGTTTGA	3527205	3527228	1	GCCTCTCATGGTATGGACTTCCAG	3527229	3527368	TTTTTCTATATAAAAATAAATAGTTCTCATGATGTACATAGCAACATCTGTGTTCGTCGTTCGTGGTATTGATTTAATCGGTGGAATATTTTAAATTATATATATATATATATATATATATATATATATATATCAATAAC	GCCTCTCATGGTATGGACTTCCAGCTTCAGCTTCCCGATATCCGACGGTAGTGTNNNNNNNNGGGAGACAGAGTTTGA	3527236	3527272	-	0	2054_0088
1:3564217-3564396/16,28/+	0.976035	1	3564217	3564232	1	AGAAGAACGACAAAAA	3564369	3564396	1	GAAGGAGACGACGATATAAGTAGCTTAG	3564233	3564368	TAGTGCAAGCCTTAGCCAAACATCTAAAGATGTTGTTGATGATGATGATGATGATTGGCCAGAAGAAGAAGATTCTGCTAATTCTTGGGCTCCAATGTTTACAGTGAATGAGGATGATGTTTCTTTCAGTGATCTT	GAAGGAGACGACGATATAAGTAGCTTAGCTTCAGCTTCCCGATATCCGACGGTAGTGTNNNNNNNNAGAAGAACGACAAAAA	3564261	3564287	+	0	2092_0090
1:3612102-3612281/20,23/+	0.980869	1	3612102	3612121	1	GAGGAGATTCATGGGATGCT	3612259	3612281	1	GTACGGTGTCGTTCGTAGTCTTT	3612122	3612258	TTTTATGGAAACTCGATTTCGAACTGTATCAATCATTTCTGTTTCTTTTATGAGCTGAGGAAAAGAGCCACTCTTTCTGATTTGATTGATTCATCATTCATCGACAATGGCTTCTTCTTCTTCTTCTTCGTCTTCGA	GTACGGTGTCGTTCGTAGTCTTTCTTCAGCTTCCCGATATCCGACGGTAGTGTNNNNNNNNGAGGAGATTCATGGGATGCT	3612232	3612256	+	0	2114_0091
1:3722888-3723067/18,27/-	0.980473	1	3723050	3723067	1	GAAGATTCAGAGGGAATG	3722888	3722914	1	GAAGAGTGAGTGAGAGAGAAAGAGTGT	3722915	3723049	TTATGGAAAAAAAACACGAGGAAGAAGAAGAAGAAGAAGAAGAAGAAGGGTGAAACAGGGATATTCCTGATTAAAAGGTAAAGTGAATCATAATTTCGTCGGATTTTTAGGAGAGAGAGAAAGAAGAAAAGAGAT	GAAGAGTGAGTGAGAGAGAAAGAGTGTCTTCAGCTTCCCGATATCCGACGGTAGTGTNNNNNNNNGAAGATTCAGAGGGAATG	3723002	3723029	-	0	2169_0092
1:3776976-3777155/16,27/+	0.813079	1	3776976	3776991	1	CTAATGTGGTGATGAA	3777129	3777155	1	CGGTAACCAAGTGGCTCAAAATCATGA	3776992	3777128	TGGTATATATATATATATATATATATATATATATATATATTTTGTTGTGAACTAATGGTAAATATTTAAAATAAGACATACGTACATAAATCCACGGACTCTTAAAGTCATGATGCGGTTAATAAATGTTCACATAA	CGGTAACCAAGTGGCTCAAAATCATGACTTCAGCTTCCCGATATCCGACGGTAGTGTNNNNNNNNCTAATGTGGTGATGAA	3776995	3777031	+	0	2211_0093
1:3878444-3878623/18,27/+	0.802804	1	3878444	3878461	1	GCTCATCCATGTTCGTTT	3878597	3878623	1	AGTCCATAACAAAATAAGAAATGCCAA	3878462	3878596	ATATTTTTGACCCACTGTTCTGTTCTGAGACCTTAAGTGTAAGAAGAATTCTCAAGTTAATATACATCTTAAAAAGCAGTTATGAAATATAGCCGACTAAATAAATAATTAATTAAATAAATAAACAGAGGATAT	AGTCCATAACAAAATAAGAAATGCCAACTTCAGCTTCCCGATATCCGACGGTAGTGTNNNNNNNNGCTCATCCATGTTCGTTT	3878559	3878586	+	0	2296_0094
1:3896995-3897174/23,22/-	0.97835	1	3897152	3897174	4	TCTCGTTTCTTCTCTTTCTCTCT	3896995	3897016	1	CCGTTTGGCCCAATAAAAGCCC	3897017	3897151	AAACATTAAATATGACATCTAGTTACCACCACTATCACTCTTATCATATTATTATGATTCATATCCCACGTAGATATATATATATATATATATATGTGATGGGTTACTTTTGCTCTTCTTCTCTTTATGTCAACT	CCGTTTGGCCCAATAAAAGCCCCTTCAGCTTCCCGATATCCGACGGTAGTGTNNNNNNNNTCTCGTTTCTTCTCTTTCTCTCT	3897057	3897078	-	0	2305_0005
1:3960366-3960545/16,29/-	0.977525	1	3960530	3960545	1	GAGAGAGTATAAGTCC	3960366	3960394	1	AGGACTCTCTGTCTGTCATAGGACAAACC	3960395	3960529	AAAAGTAACTTAATATATATATATATATATATATATATATATATGGTCCCATAGAAAGGTAAGAAAAAACACACAAAGGAGTGCAATGAGAAGCAAAAAGGACATGTGGAAATTTAATAAAAAGGCACAACAATA	AGGACTCTCTGTCTGTCATAGGACAAACCCTTCAGCTTCCCGATATCCGACGGTAGTGTNNNNNNNNGAGAGAGTATAAGTCC	3960486	3960517	-	0	2352_0095
1:3988729-3988908/16,29/+	0.974074	1	3988729	3988744	1	GGGGAATTCAGGTGGA	3988880	3988908	1	GAAGTCAGATAGCCATGCAGTTTCAAATC	3988745	3988879	TCCAACCAAGAAGCAAATACCATAAGTTCCACAGATTAGACATGTATGCTTTCGGTTACGACAAACAACAACAACAACAACAACAACAACGGTGTGTCTTTGAAGGGAAATACTTATTATTATGCTCCACAAAAA	GAAGTCAGATAGCCATGCAGTTTCAAATCCTTCAGCTTCCCGATATCCGACGGTAGTGTNNNNNNNNGGGGAATTCAGGTGGA	3988808	3988834	+	0	2362_0096
1:4015209-4015388/16,29/-	0.980763	1	4015373	4015388	1	AAAACAATCATAGATC	4015209	4015237	1	TAAGAGTCGATTCAAGGAGATGCTTAGCC	4015238	4015372	TCAAAATATGTCACTAGAACCAGTATTACTAAAACAAATTGGTAAAAACTGAGAGAGAGAGAGAGAGAGAGAGAGAGAGAGAGAGAGAGAGAGAGAGAGAGAGAAGAACGAAATCGGATCCAAGGAGCTTACCCA	TAAGAGTCGATTCAAGGAGATGCTTAGCCCTTCAGCTTCCCGATATCCGACGGTAGTGTNNNNNNNNAAAACAATCATAGATC	4015266	4015322	-	0	2374_0097
1:4049178-4049357/18,27/-	0.942684	1	4049340	4049357	2	AGAAGAAATAAAAAACAC	4049178	4049204	1	CTTCGTTAAATTCGGCAAAGCTTTCGC	4049205	4049339	TAAGGTTGTTTCTGTTAATAGCTAAACTATAGGACTAACATTAAACGTTAATGATGTTCGAAGTTTTCTAACGAAGAGAATAACAGACACACTGAAATTCAAATAATCTCTCTCTCTCTCTCTCTCTCTCACTAT	CTTCGTTAAATTCGGCAAAGCTTTCGCCTTCAGCTTCCCGATATCCGACGGTAGTGTNNNNNNNNAGAAGAAATAAAAAACAC	4049210	4049233	-	0	2383_0098
1:4079567-4079746/19,26/-	0.899512	1	4079728	4079746	1	CCGGTTTATATCTATGGTT	4079567	4079592	1	GCAGAGACTCCGGATCCACTGGTAAA	4079593	4079727	AAATAACAGATGAATCCGATTAGAATTACTTTTTAGATTTCAATAGATAAGATAATTGTAGGAATATTAAAAAATATATATATATATATATATATATATATATGTACTGTTTTGATAGAGTGACAAAATGTAAAT	GCAGAGACTCCGGATCCACTGGTAAACTTCAGCTTCCCGATATCCGACGGTAGTGTNNNNNNNNCCGGTTTATATCTATGGTT	4079625	4079654	-	0	2403_0099
1:4139764-4139943/16,29/+	0.976884	1	4139764	4139779	1	GTAGAAGCATACGATG	4139915	4139943	1	GTAAGTGTGTCTTGTGGTTGCTGTGTTTC	4139780	4139914	ATTTCGTCAAATTCATGTCAAGTTATCAAGAACTTTTGCCGATGCTCAAAACCTAATGATAATTGACGTGGGAGTTTTGTTATGCGAAAATGATGGTTGGGTATATATATATATATATATATATGTTATGTAATT	GTAAGTGTGTCTTGTGGTTGCTGTGTTTCCTTCAGCTTCCCGATATCCGACGGTAGTGTNNNNNNNNGTAGAAGCATACGATG	4139881	4139903	+	0	2479_0101
1:4173358-4173537/18,26/+	0.972038	1	4173358	4173375	1	ACAGAAGCAATATTTCGA	4173512	4173537	1	GCGTTTTTACTGCTGCTGTTGTGGTG	4173376	4173511	TCCTAAGCTAGGGGATGAAGAGCGTGAAAAAGGTGATTGCTTTAGCAATTAGTCTCTTTTTTTTTTTTTGTGTGTGTGTGTGTGTGTGTGTGTGGGAAAAGAAAGCTTATAGAACCCTGAAAACAAGAATGAATTA	GCGTTTTTACTGCTGCTGTTGTGGTGCTTCAGCTTCCCGATATCCGACGGTAGTGTNNNNNNNNACAGAAGCAATATTTCGA	4173444	4173469	+	0	2496_0102
1:4196655-4196834/17,28/+	0.947999	1	4196655	4196671	1	GGTGGGTTTTTGTCTTG	4196807	4196834	1	GAGTCGTTCTAAAGTAAAATATTGGCAT	4196672	4196806	TCTTGTGAGGTTGTAATTAAAAAAATCAATGGCTTTTGCAAGTGAATATTTTAAAACTGTTTAATTAATGACTTTTGCAAAGAAATATCTAAGAATTAGTTGTTGTTGTTGTTGTTGTCAAAGTGATTCATGAAA	GAGTCGTTCTAAAGTAAAATATTGGCATCTTCAGCTTCCCGATATCCGACGGTAGTGTNNNNNNNNGGTGGGTTTTTGTCTTG	4196770	4196789	+	0	2503_0103
1:4260963-4261142/16,29/+	0.970523	1	4260963	4260978	1	CAGAAGTCGTGAGGAT	4261114	4261142	1	GTTTCTTTTGATAGCTGTGACGGTCTCGT	4260979	4261113	TATTTTAACCCGGATTTAAAACATCTAACTACACTGGTGTTGGGTTCATCATCATCGGTCACCATCCCTACACCTTGGGAGAAGGACAAGGAGAAGGAGAAGGAGAAGGAGAAGGAGGACGAAGAATTCTTCTTA	GTTTCTTTTGATAGCTGTGACGGTCTCGTCTTCAGCTTCCCGATATCCGACGGTAGTGTNNNNNNNNCAGAAGTCGTGAGGAT	4261056	4261095	+	0	2538_0104
1:4261680-4261859/18,27/-	0.935539	1	4261842	4261859	3	GAGATTAAACTCTGGAAA	4261680	4261706	1	AAAAGTGCTAGTGGCATGACCGCGGCT	4261707	4261841	TAACAAAGAGGATAACCGATGGAGTAATCATTGAAAGCAACATCATATGATTCGGTTTCGGGATCATATACCATCAATGTTCGACTTCGCACACGACAATAAAACAACAACTTCTTCTTCTTCTTCTTCTCATAA	AAAAGTGCTAGTGGCATGACCGCGGCTCTTCAGCTTCCCGATATCCGACGGTAGTGTNNNNNNNNGAGATTAAACTCTGGAAA	4261712	4261731	-	0	2539_0105
1:4329123-4329302/20,23/-	0.757622	1	4329283	4329302	1	CGATGGCAATGGTATGGTCG	4329123	4329145	1	CGGTACTACTATTCAAATGTTGA	4329146	4329282	AACCATATATATATATATATATATATATATATATATATATATATATATATATATAGATAGATAGATGAGAACTGAAAACTGATTAGATTACAAATATATACTTTGTTCGGATCTCTTGAAGCATATATAATTATATA	CGGTACTACTATTCAAATGTTGACTTCAGCTTCCCGATATCCGACGGTAGTGTNNNNNNNNCGATGGCAATGGTATGGTCG	4329220	4329278	-	0	2583_0106
1:4384928-4385107/16,26/-	0.980239	1	4385092	4385107	1	GGGACGTTGAGAAGAG	4384928	4384953	1	GAAGAAGAAGCAGATTCTCTGAGGGG	4384954	4385091	AAACTATACAAGCTTTCGTAGCTAAGAAAGACTGTTCCTGTTGTTGTTGTTGTTGTTGTTGTTGCTGTGAAGCAGCGTCGAGTGTGAAAGGATGTAATAACGGAGAAGAAGAAGAAGAAGAATCAATCGATTGCTGAA	GAAGAAGAAGCAGATTCTCTGAGGGGCTTCAGCTTCCCGATATCCGACGGTAGTGTNNNNNNNNGGGACGTTGAGAAGAG	4385024	4385053	-	0	2629_0107
1:4446286-4446465/17,23/+	0.981772	1	4446286	4446302	1	AAAGATTCACAAGCGAG	4446443	4446465	1	GCTGTGTTTTCTCTTTCGTCGGG	4446303	4446442	TTTTGACAAAGCAAAAGTCTACGTACCTCTTTGATTTGGTCATGGGTTTGGTACTATCGTTATTCTGTTCATCATTGTTAGCACTTTGTACATCCAATGATTTCTTCTTCTTCTTCTTCTTCACAACATTGCTAACAACA	GCTGTGTTTTCTCTTTCGTCGGGCTTCAGCTTCCCGATATCCGACGGTAGTGTNNNNNNNNAAAGATTCACAAGCGAG	4446404	4446424	+	0	2677_0109
1:4546223-4546402/19,23/-	0.984366	1	4546384	4546402	1	GAACTTGAAGACAAAACAC	4546223	4546245	1	GACGTATCTCCATGGTAACCCTG	4546246	4546383	AGTGAAGAGAAGAAGAAGAAGAAGAAGAAGAAGAAGAAGAAGAAGAAGAAGAAGAAGAAGAAGAAGAAGAAGAAGAAGAATACTACCTTCACAAGTCGTTTGAAACCTTCGTCAACTTCTCCACAGAAGAAAGTTCTC	GACGTATCTCCATGGTAACCCTGCTTCAGCTTCCCGATATCCGACGGTAGTGTNNNNNNNNGAACTTGAAGACAAAACAC	4546304	4546380	-	0	2738_0110
1:4556742-4556921/18,23/-	0.960001	1	4556904	4556921	1	TTTGCTTTAGAGAGAGGG	4556742	4556764	1	GTCGGCCCGTCGCGTTACAAGAC	4556765	4556903	ATCAATACATATATATCAGGCTCTCTCTCTATATATATATATATATATATATATATATATATATATATATATATATATATATATATATATATATATAAGGCCTCTAGGATCAGTATTTTGAGTGATTAAAAATGCATAA	GTCGGCCCGTCGCGTTACAAGACCTTCAGCTTCCCGATATCCGACGGTAGTGTNNNNNNNNTTTGCTTTAGAGAGAGGG	4556807	4556874	-	0	2751_0111
1:4568362-4568541/17,28/-	0.830287	1	4568525	4568541	1	GAGGTTTGTTTTGCTGC	4568362	4568389	1	AGTCAATATCAATAGCTTCAAACGAAAA	4568390	4568524	ATCAAAAAAGTACCAACAACACATTCATCAAAATCTAACAACAATAATACAACAGATTGAAACAAAACTTGCAATATATATATATATATATATATATATATATATATAACCTGTATCAATCAATTTTTAAAACCT	AGTCAATATCAATAGCTTCAAACGAAAACTTCAGCTTCCCGATATCCGACGGTAGTGTNNNNNNNNGAGGTTTGTTTTGCTGC	4568417	4568451	-	0	2759_0112
1:4604792-4604971/17,28/+	0.983032	1	4604792	4604808	1	ACGTTAACATCCAACAC	4604944	4604971	1	CCAAAAGTTTGATCTCTTCACTTCCTTC	4604809	4604943	TATAAATAGTAATTTTGCGATTGCAATAAGTCACAACACTCGACACAAAAGCAAAAACAAAAATGGGTGAGAAAGATATTCCAAGGAACTTGAAGGAAGAAGAAGAAGAAGAAGAAGAAAACCAAAGTGAAGAAA	CCAAAAGTTTGATCTCTTCACTTCCTTCCTTCAGCTTCCCGATATCCGACGGTAGTGTNNNNNNNNACGTTAACATCCAACAC	4604900	4604927	+	0	2788_0113
1:4606513-4606692/18,26/+	0.975823	1	4606513	4606530	3	AACAAGAACCAAAAAAAA	4606667	4606692	1	CCAAGGATATTGGTACTACGAAGACG	4606531	4606666	TGGATGAGAAAGATATTCTAAGGAACTTGAGGGAAGAAGAAGAAGAAGAAGAAGAAAATCAAAGCGAAGAAACCAAAATTTTGATCTCTTCACTTCCTTGGGAGATAGATTACCTTGGGAACAAGCTTTTCAAGTA	CCAAGGATATTGGTACTACGAAGACGCTTCAGCTTCCCGATATCCGACGGTAGTGTNNNNNNNNAACAAGAACCAAAAAAAA	4606563	4606586	+	0	2789_0114
1:4606917-4607096/22,23/+	0.941453	1	4606917	4606938	2	AAACCGGACTTGACCAAGTTCT	4607074	4607096	1	CACTTTGGTGTTTCCTCAATGCC	4606939	4607073	TATCATCATCATCATCATCATCATCTCCGAGATTGTTCTCAACTCATATGTCCTTGGACGCGCTTAAACTACCCTTGAAGAAGTCTCCTTGCAAGGTAGTGTACGTGTGCAGGAACGTGAAAGACGTGTTGGTGT	CACTTTGGTGTTTCCTCAATGCCCTTCAGCTTCCCGATATCCGACGGTAGTGTNNNNNNNNAAACCGGACTTGACCAAGTTCT	4606940	4606963	+	10	2790_0115_SNP_a
1:4653311-4653490/16,29/+	0.883354	1	4653311	4653326	1	ACCAAAAGGACTCGAA	4653462	4653490	1	CCAACAGTCCAAGCCTTTTACTATATTTG	4653327	4653461	AAAAGAACAATATATATTTCAATTAATGGAAGGAAACCATAATTAATAATAATAATAATAATAATTAAAAAATCAGAAATAACCATGAATCAACAGTCTCCAAACGCTAATTATGTATTTTATCCAGCTTCCACT	CCAACAGTCCAAGCCTTTTACTATATTTGCTTCAGCTTCCCGATATCCGACGGTAGTGTNNNNNNNNACCAAAAGGACTCGAA	4653365	4653391	+	0	2810_0116
1:4691660-4691839/16,29/+	0.971472	1	4691660	4691675	4	AAACAAAAGAACACAA	4691811	4691839	1	GAAACAATTGGAGCGTTAGTTTTGTCTTT	4691676	4691810	CTTTTTTTGGCATTTTCAAAATAATCTCCCTTTTTGGTTTACCCTAGTGTGTGTGTGTGTGTGTGTGTGTTTGTGCAACACGTTTGTGTTTTCAATTTGCAAAATGTATTGTGAGACACATAATTATTTGCTTTT	GAAACAATTGGAGCGTTAGTTTTGTCTTTCTTCAGCTTCCCGATATCCGACGGTAGTGTNNNNNNNNAAACAAAAGAACACAA	4691722	4691750	+	0	2844_0117
1:4692670-4692849/16,29/+	0.916745	1	4692670	4692685	1	CTATGTGGACGTGATG	4692821	4692849	1	GCATGCATAAAGCATTATATTTTTGGGCT	4692686	4692820	ATGTGCATGCTTGTTAATTTGACTTGAATTTAACAAAATGCATTAGTCTTAAAGCTCGCCTTAGTTTACAAGATATTTTTAAGATATATATATATATATATATATCAAATTATTTTAAACATCTGGCTAATCTTA	GCATGCATAAAGCATTATATTTTTGGGCTCTTCAGCTTCCCGATATCCGACGGTAGTGTNNNNNNNNCTATGTGGACGTGATG	4692769	4692790	+	0	2845_0118
1:4776721-4776900/17,26/+	0.951826	1	4776721	4776737	1	TTTAACGGTGGCGTTGG	4776875	4776900	1	GTGATTACCAGAGACTTGGTGAAGGG	4776738	4776874	ATTCAGTCCTGGTCCGATGACTCTGGTCTCTAATATGTTCCCTGATTCCGATGAGTTTAGGTCTTTCTCTCAGCTTCTCGCTGGAGCCATGTCTTCTCCAGCGACTGCAGCTGCTGCTGCTGCTGCTGCGACGGCTA	GTGATTACCAGAGACTTGGTGAAGGGCTTCAGCTTCCCGATATCCGACGGTAGTGTNNNNNNNNTTTAACGGTGGCGTTGG	4776842	4776866	+	0	2896_0119
1:4807772-4807951/16,29/+	0.954591	1	4807772	4807787	1	GACTTGACACTTGAGT	4807923	4807951	1	CCGAGACATATATGTAGTATGTACCCACC	4807788	4807922	TTTAAATAGGTAACATCTCATGGAGATCCCAATATTCATTCTAAATTCCTCCAAGATAATGCAACATGTTACAACAACAACAACAACAACAACAACAACAACAACAACAACAACAACAACAACAAAAGAGATTGG	CCGAGACATATATGTAGTATGTACCCACCCTTCAGCTTCCCGATATCCGACGGTAGTGTNNNNNNNNGACTTGACACTTGAGT	4807858	4807912	+	0	2912_0120
1:4892020-4892199/16,28/+	0.967595	1	4892020	4892035	1	AGAGAACAATGGAGAA	4892172	4892199	1	TGGAAACTCTCTGCGAATCGGAAGTGAA	4892036	4892171	TCTTTAACAAGGAAGAGATTATATAATAATAATAATAATAATAATAAGAAGAAGAAAGTACTTACGGATTTGGATTAACGAAAGAGAAAGAACAAAAAAAAAGAAGATTAAGAATATTTATTCAATTGTGGTCTGT	TGGAAACTCTCTGCGAATCGGAAGTGAACTTCAGCTTCCCGATATCCGACGGTAGTGTNNNNNNNNAGAGAACAATGGAGAA	4892058	4892082	+	0	2950_0121
1:4989541-4989720/18,23/-	0.980261	1	4989703	4989720	1	ACAAAGAAAGAACCCAAG	4989541	4989563	1	GGGATTGAGTCTTCTGTGAGGTC	4989564	4989702	TAGATAGATGATGATGATAATATTAGAGGATGAAGAACAAGAAGCCACACTAAAATATTTATATAAATATACAAATACACACACCTCAAAAAACCCTATCTCTCTCTCTCTCTCTCTCTTGCTTTGTTGTTTAATAATT	GGGATTGAGTCTTCTGTGAGGTCCTTCAGCTTCCCGATATCCGACGGTAGTGTNNNNNNNNACAAAGAAAGAACCCAAG	4989584	4989604	-	0	3007_0122
1:5043431-5043610/18,27/+	0.980617	1	5043431	5043448	1	GTTAAGTTGGAAGAAGAG	5043584	5043610	1	CCCGCTAAGAAAAGTGTTGACTTGGTG	5043449	5043583	ATTGTTGTTCAGACTAAGAAGAGAAAGACCAATGCAAAAGCTGGCTCGACTCCAAAGGCTAAGAAGCCAAGGAAACCAAAGGATGAGAACAGTAACAACAACAACAACAACAACACGAATGTTACTCGAGTTAAA	CCCGCTAAGAAAAGTGTTGACTTGGTGCTTCAGCTTCCCGATATCCGACGGTAGTGTNNNNNNNNGTTAAGTTGGAAGAAGAG	5043542	5043563	+	0	3035_0123
1:5068486-5068665/17,28/+	0.946557	1	5068486	5068502	1	ACGTTTCTGTGTATAAG	5068638	5068665	1	GCAGAGTACTTCTGGCTATGGTTGGTTT	5068503	5068637	AGTATTATGAGGACGAAAAGAGAAGAGACTTAAATGGATAAATAGCGTCTTGAGGACGAGTTTTGGAGCTGTATTGAAAGAGAGAGAGAGAGAGAGAGAGGATAGTGAAAGAAATAGTATGAGTATGAATATGAG	GCAGAGTACTTCTGGCTATGGTTGGTTTCTTCAGCTTCCCGATATCCGACGGTAGTGTNNNNNNNNACGTTTCTGTGTATAAG	5068581	5068602	+	0	3058_0124
1:5087879-5088058/21,24/-	0.966596	1	5088038	5088058	1	GAGTAACGCTGATGTTCTCAG	5087879	5087902	1	CGAGTGGGCATGCCAGAGCTATCA	5087903	5088037	AGGAATTCTGAAAGAGGTATGAGCAAGCAAACTCTAGTAACTTGACTAGTAGTAGTAGTAGTAGTAGTATTAGGATGTATAAAGTTCTAATTATAGTCGTTTGTTCTCAAATGTTAGATTCCAGTAGCAGAACTA	CGAGTGGGCATGCCAGAGCTATCACTTCAGCTTCCCGATATCCGACGGTAGTGTNNNNNNNNGAGTAACGCTGATGTTCTCAG	5087965	5087991	-	0	3077_0125
1:5149334-5149513/16,29/+	0.980865	1	5149334	5149349	1	CACCTTCCCAAATAAA	5149485	5149513	1	TAACGGCATGGATGAGCTTCTAGCTGTTC	5149350	5149484	GCAAAACCTAGATCCGACATTGAAGGAAAAACCTTTTAGATCCATCTCTGAAAAAAAACCAACCATGAAGAGAGATCATCATCATCATCATCATCAAGATAAGAAGACTATGATGATGAATGAAGAAGACGACGG	TAACGGCATGGATGAGCTTCTAGCTGTTCCTTCAGCTTCCCGATATCCGACGGTAGTGTNNNNNNNNCACCTTCCCAAATAAA	5149424	5149445	+	0	3118_0126
1:5194096-5194275/25,20/-	0.98151	1	5194251	5194275	1	AGGAACACAATAATGTGTATAGGTT	5194096	5194115	1	TCCTCTCTCTCCTCGCCGTC	5194116	5194250	AAGCAAAGACAGCTATATATATAGAAAACAGAGAGAGAAGAAGAAGAAGAAGAAGAAGAAGAAGAAGAAGAAGAAGAAAGATGGGGCTACAAGGTCAGCTAAGTGACGTCTCTTCCGATTCAATCCCTCTTATGC	TCCTCTCTCTCCTCGCCGTCCTTCAGCTTCCCGATATCCGACGGTAGTGTNNNNNNNNAGGAACACAATAATGTGTATAGGTT	5194173	5194219	-	0	3140_0128
1:5199061-5199240/18,26/-	0.980257	1	5199223	5199240	1	GGAATGGGAGAGAATCAG	5199061	5199086	1	TTCTGCTGCTGCTTCTATTCACGATC	5199087	5199222	AGGAAGAAGAAGAAGAAGTAGGAATCCAAGTAGTAGAAAGCTCGATGATGTTGATGAATAAAAAGAAGAGGAACGGTCAAAGTAGAGAGAGAGAGAGAGAGAGAGAGAGAGAGAGAGAGAGAGGGATAGATACGGC	TTCTGCTGCTGCTTCTATTCACGATCCTTCAGCTTCCCGATATCCGACGGTAGTGTNNNNNNNNGGAATGGGAGAGAATCAG	5199100	5199139	-	0	3146_0129
1:5283840-5284019/16,29/+	0.920775	1	5283840	5283855	1	GCTAACACATAAAATC	5283991	5284019	1	CGGAGGATTTGGCTAGGGACGTTCGAGAC	5283856	5283990	ATTTTAACATCTAGATACGTAAATATCAATAAGTTATTGCTTAAAAATTCTACTATATATATATATATATATATATTCACCATGCTTAATTATTAATTTTGACATGCGTGATGATCTTTCAAAATAAAAAGGAAA	CGGAGGATTTGGCTAGGGACGTTCGAGACCTTCAGCTTCCCGATATCCGACGGTAGTGTNNNNNNNNGCTAACACATAAAATC	5283909	5283931	+	0	3198_0131
1:5405530-5405709/16,29/+	0.923294	1	5405530	5405545	2	TCCTATGAATGATATA	5405681	5405709	1	GTTCATATGTATGTTGGGGTCTCTTTTGG	5405546	5405680	TCATCATCATCATCATCATCATCATCATCATCTTAAGATCACAAGTTTGATTGGATTATGCTAGATTCAAAAATAAAAAGTTGTGACTTTTTTGGAAAACGTCAAGAGTGGAAAATAAAAAAGGGATTTTGGTGT	GTTCATATGTATGTTGGGGTCTCTTTTGGCTTCAGCTTCCCGATATCCGACGGTAGTGTNNNNNNNNTCCTATGAATGATATA	5405545	5405577	+	10	3265_0132
1:5420944-5421123/17,28/-	0.733027	1	5421107	5421123	1	GCTAACTTATTTTATCA	5420944	5420971	1	GCTTTTTAATTTAGTTTTGCTTTCTTTC	5420972	5421106	GCATCCAATTATCTGTCACCTTCTCTTATTAAAATCTCCATTTCTGCAAGTTTTAATGTCCGTATATATATCTCGAAGAGAGAGAAAATCCCTTTTTCTCTAGATAGAGAGAGAGAGAGAGAGAGAGAAGAAGAA	GCTTTTTAATTTAGTTTTGCTTTCTTTCCTTCAGCTTCCCGATATCCGACGGTAGTGTNNNNNNNNGCTAACTTATTTTATCA	5420973	5421005	-	0	3270_0133
1:5431253-5431432/18,27/+	0.930964	1	5431253	5431270	1	GAAACCTTGTGCTTCCAA	5431406	5431432	1	GATGTTTCTGAACCAGCAAACTGCTTG	5431271	5431405	ATTTTCTTTGTTACGTGTGTGTGTGTGTGTGTGAGTGTGTGTCAATATTCAAATATAGCTAGGGGAAGTCTAACTGAGTATCATACCTCAGTTCTTGCCTTCTTGCCATCCGAAGTCGCAGTAGATTCTAGATCG	GATGTTTCTGAACCAGCAAACTGCTTGCTTCAGCTTCCCGATATCCGACGGTAGTGTNNNNNNNNGAAACCTTGTGCTTCCAA	5431285	5431312	+	0	3281_0134
1:5481813-5481992/16,29/-	0.97871	1	5481977	5481992	1	ACCAGAGACAACAAAC	5481813	5481841	1	GGCCTTTCTCTTGTAAGCTCTTGACTGTG	5481842	5481976	AAAAGCAACTTCAATGGTTAAGGATACTTAAGGGGGATACTTGAGGGAATTAATAAGCTTTTCAAGACCCGATCTTAATGCCATTTTCCACGGATTCTTGCGATGCTGAAGGAGGAGGAGGAGGAGGAGCAAGAT	GGCCTTTCTCTTGTAAGCTCTTGACTGTGCTTCAGCTTCCCGATATCCGACGGTAGTGTNNNNNNNNACCAGAGACAACAAAC	5481848	5481867	-	10	3327_0135_SNP_a
1:5508497-5508676/16,29/-	0.878153	1	5508661	5508676	1	AAGGACTACTGATGTT	5508497	5508525	1	GATGAGAAATTGATGGAATGGTTTTTGTT	5508526	5508660	GCTGACTGATCATCGCCGGTTTCATTCTCAACCGAAGTTTTTTTGCTCTGCCGTGTGATGTCTTCCATTACCGGAGAAACTTCGACGGCGATGAACATAAAAGAAGAGGAAGAAGAAGAAGAAGAAAACAACAAG	GATGAGAAATTGATGGAATGGTTTTTGTTCTTCAGCTTCCCGATATCCGACGGTAGTGTNNNNNNNNAAGGACTACTGATGTT	5508535	5508560	-	0	3332_0136
1:5534622-5534801/18,26/+	0.981247	1	5534622	5534639	2	AAACCGAAAAGGGAAGAA	5534776	5534801	1	GAAGAGACTTGGGATGTTGGTATGAC	5534640	5534775	GAGGCCAAACATGAGAGAAGTTTCAGTTGAGCTGGAGAGGATTCGTTCATCATCTTATAAGTCAGAGATTCATAATGATGATGATGATGATGATGATGATGATGATGAGGATGATCAAGCCATGGAACTCAACATT	GAAGAGACTTGGGATGTTGGTATGACCTTCAGCTTCCCGATATCCGACGGTAGTGTNNNNNNNNAAACCGAAAAGGGAAGAA	5534714	5534754	+	0	3336_0137
1:5562061-5562240/21,21/-	0.962219	1	5562220	5562240	1	GTGGTTTCTGCTGTATCTACG	5562061	5562081	1	GGTGTGCCTGAGCCTGAACAG	5562082	5562219	GAGCCCACTACTGAAATATGTTATGGCCTCAATTCATATGGGTCAAGGTCTTCGTTGATGTATCATGCAAAATTAATATAAAAGTGAAAAGGTTGACTCTTGACTTATCTGTGTTAGAGAAAGAGAGAGAGAGAGAGA	GGTGTGCCTGAGCCTGAACAGCTTCAGCTTCCCGATATCCGACGGTAGTGTNNNNNNNNGTGGTTTCTGCTGTATCTACG	5562081	5562104	-	0	3345_0138
1:5563730-5563909/21,24/-	0.980768	1	5563889	5563909	1	GGTGGTCTGTTTCTATCCATC	5563730	5563753	1	TTGTAGGCTACAAATTTCCCCTCC	5563754	5563888	ACAACAACAACAACAACAACAACAACAACAGTCCTTCAAATTATTCTAACTGACAAGACCTGTAACAAGAATCTGACATACTGAACTATAAAGAATCACTGCTAAAACTTTAAAGATGCCAAATTGCTTCAGAGA	TTGTAGGCTACAAATTTCCCCTCCCTTCAGCTTCCCGATATCCGACGGTAGTGTNNNNNNNNGGTGGTCTGTTTCTATCCATC	5563859	5563888	-	0	3347_0139
1:5609797-5609976/18,27/-	0.965012	1	5609959	5609976	1	GCCGGATTATCAATCGCT	5609797	5609823	1	GCTTTGATTTCGTCTGGTGTGACCAAG	5609824	5609958	GCTATACAAAATTCCTGTGACAAAACATCACATGATCATCTTATTTAGTGTACACGTCTATTTTTGTATATATATATATATATATATATGCATACACTCTTTTATAAAAGTAATATTTTACTTACTACGCATTGA	GCTTTGATTTCGTCTGGTGTGACCAAGCTTCAGCTTCCCGATATCCGACGGTAGTGTNNNNNNNNGCCGGATTATCAATCGCT	5609870	5609892	-	0	3362_0140
1:5639461-5639640/16,28/-	0.96721	1	5639625	5639640	1	AGGCTTGTGTCGTCGT	5639461	5639488	1	CGAGCTCGTTGAATTGCATTGTTGTTGC	5639489	5639624	CATCGTCGAAGAGGCTTAACAATGGTTTCGCCGGAAACTTATCGGAAATCGGTGGCACATTCAAATCTTGAAATCTTGGAACTGTTTGGTTGGTTTGGTCTTCGTGATGATGATGATGATGATGAGACGATGATGA	CGAGCTCGTTGAATTGCATTGTTGTTGCCTTCAGCTTCCCGATATCCGACGGTAGTGTNNNNNNNNAGGCTTGTGTCGTCGT	5639489	5639520	-	0	3384_0142
1:5894725-5894904/16,29/-	0.957175	1	5894889	5894904	1	GTATGACTGAACTGGA	5894725	5894753	1	ACCTTTGGAGGAGTTTGCTTCTTCTAGAG	5894754	5894888	TTTATTTGCTGACTTCAAGGTGATGCGACAAAGTCAAATTTCTGCAGAATAGCAAGAAATGTTCATATGAGAATCGCAAAAAGTTCGGAAATTGCAGAGAAGTGTGTGTGTGTGTGTGTGTATGTGTAGATACAT	ACCTTTGGAGGAGTTTGCTTCTTCTAGAGCTTCAGCTTCCCGATATCCGACGGTAGTGTNNNNNNNNGTATGACTGAACTGGA	5894762	5894787	-	0	3554_0143
1:5987561-5987740/17,28/+	0.980002	1	5987561	5987577	1	ATGATGAAGGTAAAGGA	5987713	5987740	1	GTGTATTATTTGGTTGAGAGGGGTTTTG	5987578	5987712	GTAGAAGATGCAGGAGAAGGTTCCATAGGATTAGGAGATTGTAGAGATTTCGGTGACAGAGACGATGAGGGAATCGGTTCCGCCATTAGAAGAAACCCAGCTGTGAAGAAGAAGAAGAAGAAGAAGAAGAAGAAG	GTGTATTATTTGGTTGAGAGGGGTTTTGCTTCAGCTTCCCGATATCCGACGGTAGTGTNNNNNNNNATGATGAAGGTAAAGGA	5987682	5987712	+	0	3619_0144
1:6032337-6032516/16,29/+	0.983003	1	6032337	6032352	1	CTAAAGGGAAGGAAGA	6032488	6032516	1	GTTTGGTTTGAACATGGAGAAGGATACAG	6032353	6032487	ACTGATGCGCCTCTTCTTGGTTGTCATGTGGTGCTTCTGTGTTTTCTCCTGCCCCAAATCCTGTTTCAAGAGTTTTCATTAGATTGATGGATTGATAACAATGATGATGATGATGATGATGCCATTACGTACTCA	GTTTGGTTTGAACATGGAGAAGGATACAGCTTCAGCTTCCCGATATCCGACGGTAGTGTNNNNNNNNCTAAAGGGAAGGAAGA	6032453	6032473	+	0	3636_0145
1:6098164-6098343/16,29/-	0.97161	1	6098328	6098343	1	TCTACAGAGAGATATA	6098164	6098192	1	GGATTTGGTTATGGTGATGACGCGATCTT	6098193	6098327	TCAAAAATTCCATTTTCTACAGAGAGAGAGAGAGAGAGAGAGAGAGAGAGAGGGACGAAATATTAATCATCGATCAAGTTGCTTCAATCGCGAAAAAATCCATGAATAAAACTATGGAATGGAATGTGAATCAAA	GGATTTGGTTATGGTGATGACGCGATCTTCTTCAGCTTCCCGATATCCGACGGTAGTGTNNNNNNNNTCTACAGAGAGATATA	6098276	6098307	-	0	3664_0146
1:6163573-6163752/24,18/-	0.9803	1	6163729	6163752	1	CGGGATTGCGTGGAAACCATGGAG	6163573	6163590	1	GCGTGAGTTCTGTGTGCT	6163591	6163728	ATGCATTGCATTTGGTAAAAACAACCATTACTATTAAAACCATGTGTGTGTGTGTGTGTGTGAAACTTTTGATTTACTTTGCTTTTGCTTGTGTTAGATGATTGAAGAGCTTCAAGTGCTTTCACCATTGGTAACAAC	GCGTGAGTTCTGTGTGCTCTTCAGCTTCCCGATATCCGACGGTAGTGTNNNNNNNNCGGGATTGCGTGGAAACCATGGAG	6163667	6163686	-	0	3692_0147
1:6247401-6247580/21,24/+	0.981054	1	6247401	6247421	1	ATAAGCTCTCCAGAGTTAGCG	6247557	6247580	1	TCGACGAGATTCCCACCACCACCC	6247422	6247556	GAATGATTGGGGTTAGAGGAAGAAGAGAAAGAAGAAGAATTGAAAATGGGTTGTTCGTGATTATTATTATTATTGTTGGAAGAAGAAGAAGAAGAAGAAGAAGAAGGTCGCTGAAAAAGCCATCGACGAACACCG	TCGACGAGATTCCCACCACCACCCCTTCAGCTTCCCGATATCCGACGGTAGTGTNNNNNNNNATAAGCTCTCCAGAGTTAGCG	6247500	6247527	+	0	3781_0148
1:6282754-6282933/16,29/-	0.977946	1	6282918	6282933	1	GAGAACACAAGGATTG	6282754	6282782	1	CTGTGATCTTCTCCTTCTACGTGATGGGC	6282783	6282917	CAACAACAACAACAACAACAACAACAACAACAATGGGTTCATTTCAAAATCTCATTTGGCTGATGGATTGGATCAGAAGAAACCAATCATTTTACACTGGAGTTCTGATTCTACTAATAGATTGAGCTGGGAGAA	CTGTGATCTTCTCCTTCTACGTGATGGGCCTTCAGCTTCCCGATATCCGACGGTAGTGTNNNNNNNNGAGAACACAAGGATTG	6282885	6282917	-	0	3806_0149
1:6287126-6287305/16,29/+	0.961914	1	6287126	6287141	2	CTTTTCCCTGATTCTG	6287277	6287305	1	GCATCCATTTCCCCAAGTATTGAGACAGC	6287142	6287276	AAAGTTTGAAAAAATTACACACACACACACACACACACGTTGCTCACAAAGACATACCTATCAGAATCCGCAACATAATGCACATCATCAATAGTATAACGTCCCCCTTGAAGGAAGAAGGGGCAAATAATCCAT	GCATCCATTTCCCCAAGTATTGAGACAGCCTTCAGCTTCCCGATATCCGACGGTAGTGTNNNNNNNNCTTTTCCCTGATTCTG	6287158	6287179	+	0	3809_0150
1:6413993-6414172/16,29/+	0.981856	1	6413993	6414008	1	AGAGATACTACAAAAG	6414144	6414172	1	CCTGGTTTAGTGCTTGACATGGAGAGGCT	6414009	6414143	CAAGCCAAGAAGAGATCAGAAAACTTGTTGTTGTTGGAGGAAGAAGAAGAAGAAGAAGAAGATTTCTTGAAATGTATATTGGATGAAGATATGGCAATCCAATCTGAGAAATGGACAGACTTTGATGATGCAATC	CCTGGTTTAGTGCTTGACATGGAGAGGCTCTTCAGCTTCCCGATATCCGACGGTAGTGTNNNNNNNNAGAGATACTACAAAAG	6414048	6414070	+	0	3884_0151
1:6469497-6469676/16,28/-	0.954394	1	6469661	6469676	2	CAAAGATACAGAGACA	6469497	6469524	1	CATTGACAAACATGGACTGATCATGAGG	6469525	6469660	TATTCAGTTTGGTGTATCATCTACCTAGATAGTTCCAATGGAGGTGTGAACACACAAACCTGGTTGTAAGAAGTCTGACCAAACATTGAATCTGGAACCCAATTTTGATGATGGTGGTGATGATGATGATGATGAT	CATTGACAAACATGGACTGATCATGAGGCTTCAGCTTCCCGATATCCGACGGTAGTGTNNNNNNNNCAAAGATACAGAGACA	6469525	6469555	-	0	3950_0152
1:6486484-6486663/16,29/+	0.960999	1	6486484	6486499	1	AAGGTTTGACTGTTGC	6486635	6486663	1	GTGTGTTTTCCTTTTCATGTTGCTTGGTG	6486500	6486634	AACTTGACTCGGATCTTACACTTGGCGTTCCATGTCGGCTTGTTTTTGATCTTGACGACGTCGTTTTCGTCAACTGGGGATGAGGATGAGGATGAGGATTAGGATTAGGATTAGGATTAGCATTAGGATGATCAT	GTGTGTTTTCCTTTTCATGTTGCTTGGTGCTTCAGCTTCCCGATATCCGACGGTAGTGTNNNNNNNNAAGGTTTGACTGTTGC	6486577	6486628	+	0	3968_0153
1:6550883-6551062/17,28/+	0.980795	1	6550883	6550899	2	AGAATATCTGAAGAAGC	6551035	6551062	1	GCGAAGAGGATAGTGATGAACCCCGGAG	6550900	6551034	GTAAACAGAAAAAGCTCTCTAGCGGTTCTGAGGGAGATGAAGAAAAGGGAGATGAAGAATACAAATGGGATGAAGACAATGCTGAGTATGAGGAAGAAGAAGAAGAGGAAGAAGAAGAAGATTCCCTAAGTGCAA	GCGAAGAGGATAGTGATGAACCCCGGAGCTTCAGCTTCCCGATATCCGACGGTAGTGTNNNNNNNNAGAATATCTGAAGAAGC	6550992	6551020	+	0	4021_0154
1:6606700-6606879/17,28/+	0.96243	1	6606700	6606716	1	AAACAATATCTTCCCCA	6606852	6606879	1	CTCCACCTCCTCTTCTTGATTTATCTAG	6606717	6606851	AGCAAGAAGAAGAAGAAGAAGAAACAGATTCTAGCAAAGATATAACTCCGGTTAATACAGATGTTACTATCGGGAAGAAGAAATCGCTTTCTTTTCTTCTCAAGAAGATGTTTGTTTGCACAAGTGGCTTCAAAA	CTCCACCTCCTCTTCTTGATTTATCTAGCTTCAGCTTCCCGATATCCGACGGTAGTGTNNNNNNNNAAACAATATCTTCCCCA	6606716	6606739	+	0	4060_0155
1:6659848-6660027/16,29/+	0.882817	1	6659848	6659863	4	ACAACACCAAAAACTA	6659999	6660027	3	GCCTTAATCTGATTTTCAAGGATGTGATG	6659864	6659998	AATTAATCACAAACGAATTTTGCTTAAGTGATCAAATTGAAATTGGTTGATAGTTAATTAAACTTTATATAAAATATATATATATATATATATATATATATATAAAAGAGTTTACCTTGAAATCTATAGTCTCGA	GCCTTAATCTGATTTTCAAGGATGTGATGCTTCAGCTTCCCGATATCCGACGGTAGTGTNNNNNNNNACAACACCAAAAACTA	6659929	6659967	+	0	4091_0008
1:6753275-6753454/16,29/-	0.976179	1	6753439	6753454	1	ACAGGAACGATTAGTG	6753275	6753303	1	GGTTGTGGCCGATCAAGACAGAATTTAAG	6753304	6753438	AAAGAAGAAGAGGAAGAAGAAGAAGTTGAACCAATAACTAAAGAACTAACTAAAGCTCCGGTTAAATCTGAAATCAATGGTGAAACACCTAAACCAATTCTTGCTTCGACTCTAATAAGGTGTAGTAGATCAAAT	GGTTGTGGCCGATCAAGACAGAATTTAAGCTTCAGCTTCCCGATATCCGACGGTAGTGTNNNNNNNNACAGGAACGATTAGTG	6753414	6753437	-	0	4165_0156
1:6764155-6764334/17,28/-	0.9498	1	6764318	6764334	1	CACTAAGATCACTGATA	6764155	6764182	1	GTCGATTTCTTCTCTTGTGAGCGACTTG	6764183	6764317	GTAGAAATATTGTCTCTTTCCTTGGGAAATAAGAAATAAATAAATTTAAAGTTTGGTTTTAACCTGAGTTACCAACTTGGAAAAGGCTTGAACATGTTCTTCTTCTTCATTCTTCTTCTTCGTTTTCCAAAAAGT	GTCGATTTCTTCTCTTGTGAGCGACTTGCTTCAGCTTCCCGATATCCGACGGTAGTGTNNNNNNNNCACTAAGATCACTGATA	6764197	6764221	-	0	4175_0157
1:6834041-6834220/16,29/-	0.977413	1	6834205	6834220	2	TGGAGGACTTGGGCTG	6834041	6834069	1	CAAGGAGTGATAGTTCTGTTGGATCAAGT	6834070	6834204	CTTGTTTCATCCAAGCCGCTTGGCGTAGACATTTAAGAAGGAAAATCGCAGAGCTTAGACGTAAAGAAGAAGAAGAAGAAGAAATGGATTATGAAGATGATGAATATTATGATGATAATATGGGTGGTATGGTTA	CAAGGAGTGATAGTTCTGTTGGATCAAGTCTTCAGCTTCCCGATATCCGACGGTAGTGTNNNNNNNNTGGAGGACTTGGGCTG	6834122	6834141	-	0	4208_0158
1:6898456-6898635/23,18/+	0.980228	1	6898456	6898478	1	GGTGGAGTTAGGATCGGCGGAGG	6898618	6898635	1	CACAAAGAGAGAGACCAG	6898479	6898617	TATCATCACCGCCGGAGCAAGAGATGAGACGGAGACAAGAAGAAGCTGGAGATCTTCCCATGACTGGTTCTTACAAGAAGAAGAAGAAGAAGAAGAAGAAGAAGACCGTTTTATCTTCTTATTGGATCAGTAAAATAAA	CACAAAGAGAGAGACCAGCTTCAGCTTCCCGATATCCGACGGTAGTGTNNNNNNNNGGTGGAGTTAGGATCGGCGGAGG	6898553	6898583	+	0	4232_0159
1:6951426-6951605/16,27/+	0.981811	1	6951426	6951441	1	TGGAACAGAACCAAAA	6951579	6951605	1	GCGGGATATTGCGGATTTTGTTTGAAC	6951442	6951578	AGAATTTAGTGAGAGAGAGAGAGAGAGAGAGAGAGAGAGAGAGAGAGAGAGAGAGAGAGAGAGAGAGAGAGAGCTAGAGCTGTATGTGAAGATGAAATCACTCTTAACCTTTCTTGCTTCTCTGAATCTGGAAATCT	GCGGGATATTGCGGATTTTGTTTGAACCTTCAGCTTCCCGATATCCGACGGTAGTGTNNNNNNNNTGGAACAGAACCAAAA	6951452	6951514	+	0	4269_0161
1:6960279-6960458/16,28/+	0.891282	1	6960279	6960294	1	TGTCGATGTGCTTTGA	6960431	6960458	1	GTTCGATAGTCTCTGTACGTATATGGTT	6960295	6960430	AACACCCAAAAGTAATATAGGACGAATATCATCATATTTATGTGTATTTCTTAAACTTGGTAGTCTATAGGTTATAATTATGTATGGGTCTTATAGTCGGCGAATATCATATATATATATATATATATATATATTT	GTTCGATAGTCTCTGTACGTATATGGTTCTTCAGCTTCCCGATATCCGACGGTAGTGTNNNNNNNNTGTCGATGTGCTTTGA	6960398	6960428	+	0	4274_0009
1:7080718-7080897/16,29/+	0.94258	1	7080718	7080733	1	CATACACCTGGTGATA	7080869	7080897	1	CGGAAATACAGTTTGATCCATTCTCTGCG	7080734	7080868	TAAGAAAAATGTCGAGAACATGAGTTTCAGTTAGTCAAATAATGATAACCAGGACAAAGAAAGTTCTACAAATATATATATATATATATATATGTGGGTTAAATATGCAAACATATACCTTTTCAAATGAATTCT	CGGAAATACAGTTTGATCCATTCTCTGCGCTTCAGCTTCCCGATATCCGACGGTAGTGTNNNNNNNNCATACACCTGGTGATA	7080805	7080826	+	0	4362_0162
1:7301227-7301406/17,28/+	0.983304	1	7301227	7301243	2	TATGAAGTAGAAGAAGG	7301379	7301406	1	GTTGGTGTGGTGTGAGACTTCGAGTGTG	7301244	7301378	GACCTGGAGACAAGGAGGAAGCTCAGGTTTGTACTGAGATCGAAGTTGCTGAAGAGGGGAGAGTTCTCTGGGGATTCCGAAATCTGAATCCATGGCGTTAGGTTTTATGTAGAAGAAGAAGAAGAAGAAGAAGTG	GTTGGTGTGGTGTGAGACTTCGAGTGTGCTTCAGCTTCCCGATATCCGACGGTAGTGTNNNNNNNNTATGAAGTAGAAGAAGG	7301354	7301376	+	0	4514_0163
1:7313937-7314116/16,29/-	0.978365	1	7314101	7314116	1	AAGAAAGACAATGCCG	7313937	7313965	1	GAGAAGCCTCTTTGTTGAACAGAGGGCTT	7313966	7314100	GCGATTAACAGAGGAGGAATTTGAGGAAATTTTGGTCCGAGCAAAGAGAGAGTAGGAGACGAGAGAGAGAGAGAGATGAAGAAGAAGAAGAAGAAAACAGCTGGCTTAGAGAAGGAAGGAATTAAGGACGAGATC	GAGAAGCCTCTTTGTTGAACAGAGGGCTTCTTCAGCTTCCCGATATCCGACGGTAGTGTNNNNNNNNAAGAAAGACAATGCCG	7314006	7314039	-	0	4522_0164
1:7374631-7374810/20,24/-	0.980437	1	7374791	7374810	1	AGCACTTGTGTGTTGTACTG	7374631	7374654	1	TCTGACAAGTCTTCCCTTATTTCT	7374655	7374790	AAACCACAAACAAACAAACAAACAAAGAAACCATTTACTTAATCAACAACTCAAAAATTAAAACAGAGCAGAAGCAGAGTGAAATTACAGAGAGAGTGAAATCTCACAGAAGACATGAGCAAGACCACAATTGAAA	TCTGACAAGTCTTCCCTTATTTCTCTTCAGCTTCCCGATATCCGACGGTAGTGTNNNNNNNNAGCACTTGTGTGTTGTACTG	7374760	7374785	-	0	4560_0165
1:7382234-7382413/18,25/-	0.980206	1	7382396	7382413	1	GCGTGGAGTGTTTTCGTG	7382234	7382258	1	GTTTTACGATGTCCTCGGCGTTAGC	7382259	7382395	TCCCTCCTCCTCCTCCTCCTCCTCACTAAGACAAATATTTTGAGGTTCTCTTTCTCGTTTGTGTGATCTGTCTGACAAGCTAGAAGAATCGTAGATCGTGATCGGATTGATTTGATAATTATGGTGAAGGAGACGGA	GTTTTACGATGTCCTCGGCGTTAGCCTTCAGCTTCCCGATATCCGACGGTAGTGTNNNNNNNNGCGTGGAGTGTTTTCGTG	7382372	7382393	-	0	4565_0166
1:7469179-7469358/17,26/-	0.980094	1	7469342	7469358	2	GCGGCTCGGTTTGCTGT	7469179	7469204	1	GTTTCCACCATGCTGGGATTTTATCG	7469205	7469341	TACAGAGAAGGCTAATATCTCAAACGAACTAGGGACATTTGTTGGAGGCGAAGGGACTATGGATCAATATTATCATTATCATCATCATCATCATCATCAAGAACAACAACATCAAAATCAAGGGTTCGAGCGGCCAA	GTTTCCACCATGCTGGGATTTTATCGCTTCAGCTTCCCGATATCCGACGGTAGTGTNNNNNNNNGCGGCTCGGTTTGCTGT	7469243	7469270	-	0	4630_0167
1:7489984-7490163/16,26/-	0.981281	1	7490148	7490163	1	GGAGTGGAGGAGGAAA	7489984	7490009	1	GAAAGTAGAGGATAAAGAATGGTGGA	7490010	7490147	TAATAGTGGGTTTCTTCTCAAAATTATGTTTCTGGTTAGTTTAGGAGCTATGAAGGATACGACTAAGAAGAAGAAGAAGAAGAAAAAGGATGAGGCTTGTAAGGTTTCACCGAGACCTTCGATCTCTGAGGAGACTGT	GAAAGTAGAGGATAAAGAATGGTGGACTTCAGCTTCCCGATATCCGACGGTAGTGTNNNNNNNNGGAGTGGAGGAGGAAA	7490060	7490083	-	0	4641_0168
1:7555369-7555548/19,26/+	0.962559	1	7555369	7555387	1	GGTTGTTTCTGCTGTTGCT	7555523	7555548	1	GTAGATAATGGTGGATATGACAAGCG	7555388	7555522	TCTGATGATGATGGTGATGATGATGATGACTGGGGTACCAAAATGGATTATCAGTATATAAAGTTGTTGGATAGTTTCAGAGAAGATGGAAGTTTAAATCTGAGTGACAATCCACTAAGGTCTATTAGGTATGAA	GTAGATAATGGTGGATATGACAAGCGCTTCAGCTTCCCGATATCCGACGGTAGTGTNNNNNNNNGGTTGTTTCTGCTGTTGCT	7555390	7555416	+	0	4684_0169
1:7599709-7599888/22,19/-	0.980466	1	7599867	7599888	1	AGCAGATATGCAAGCTGGTTTG	7599709	7599727	1	GCATTTGCTGTTGTCCGTG	7599728	7599866	ATCAATATCTTACTTTGAATTTAGTTACCCTTTATTTTAACAATGTACGTTGTTTTGATAGTCTATGCGCTTACTCTCTCACTTTTGTGCGTGTGTGTGTGTGTGTGTGTGTGTGTGTGTGTGTTTCCCCTGTCTAGAG	GCATTTGCTGTTGTCCGTGCTTCAGCTTCCCGATATCCGACGGTAGTGTNNNNNNNNAGCAGATATGCAAGCTGGTTTG	7599743	7599781	-	0	4702_0170
1:7620282-7620461/20,25/+	0.981013	1	7620282	7620301	1	AAACATGACGTTTGGTGAAG	7620437	7620461	1	GCGGGTTGTTGCTGAATCCTGGGAT	7620302	7620436	CTGTTGATCCTGCATTGGTCTGTATTGCATTGAGAGGTAATCTCGGGCCAAACGAGAAAGCTTGCTGTTGTTGTTGTTGTTGTTGTTGTTGTTGTTGTTGTTGTCGTGCCATGAAATGCATCTGTGCTTGAACTT	GCGGGTTGTTGCTGAATCCTGGGATCTTCAGCTTCCCGATATCCGACGGTAGTGTNNNNNNNNAAACATGACGTTTGGTGAAG	7620363	7620405	+	0	4709_0171
1:7661581-7661760/16,27/-	0.981919	1	7661745	7661760	1	AAAACGACGGAAACGC	7661581	7661607	1	CATCGCTTAGATGGCGCAAGCGTATTG	7661608	7661744	GTCGTGGGAAAAGAAAGCAGTAGTGACAAAGGTTTGTGTAGACAACAACAACAACAACACAACAAACTCAACATGCAAGAAGCAGCAATCTCCTATAACGAGCAATACCAGTATCGTAGAGCACAATAGTGCCAAGT	CATCGCTTAGATGGCGCAAGCGTATTGCTTCAGCTTCCCGATATCCGACGGTAGTGTNNNNNNNNAAAACGACGGAAACGC	7661680	7661703	-	0	4736_0172
1:7705977-7706156/20,25/-	0.949908	1	7706137	7706156	1	CGGTCTAATTTCTCTTCTCC	7705977	7706001	1	GTCGAAGTCGTGCGTGATGCTAGTT	7706002	7706136	TATTTCTCTCTTCTCTCTCTCTTTAAGTGAGCTTCGCCGTTAAACTTTCTCCGGTACCGGGAAATTAACGAAGAAAGCGAAAAGTCACTGTTACACTAATATCACAAATCTCTCTCTGTCTCTCTCTCTCTCTTT	GTCGAAGTCGTGCGTGATGCTAGTTCTTCAGCTTCCCGATATCCGACGGTAGTGTNNNNNNNNCGGTCTAATTTCTCTTCTCC	7706004	7706028	-	10	4770_0173_SNP_a
1:7728921-7729100/17,28/-	0.876232	1	7729084	7729100	1	CTTCGTTTCAAAACGAG	7728921	7728948	1	GTCCCAAGTTTTAGTGTGAGGTTTTTTT	7728949	7729083	ATTCTCGTTTGTCTCTTCCCTTGTCTAAAAACATCTACGGTTCATGTGATTCAAAAACACTAAAAAAATAGAAACTCAAATTTTTTTAGTACTTAACATTTAAACTATATATATATATATATATATCTTATACTA	GTCCCAAGTTTTAGTGTGAGGTTTTTTTCTTCAGCTTCCCGATATCCGACGGTAGTGTNNNNNNNNCTTCGTTTCAAAACGAG	7728958	7728978	-	0	4806_0174
1:7735006-7735185/17,28/+	0.980697	1	7735006	7735022	1	GAGATTGAGGAACATTG	7735158	7735185	1	GTAGAGAGACGAGACGGTTTGGTGTTGT	7735023	7735157	TGAATCGAGGACTGGAGTGAAGATTCTCTGATGAGTGATTCAGAAGAAGACGAAGAAGAAGAAGAAGCTAGTGAAGTCATTTTAAGCAGCGTCGTTCAGAAGAAGAAGAAGAAGAATCTGCGTTTCGGTGAAGAA	GTAGAGAGACGAGACGGTTTGGTGTTGTCTTCAGCTTCCCGATATCCGACGGTAGTGTNNNNNNNNGAGATTGAGGAACATTG	7735064	7735089	+	0	4809_0175
1:7753172-7753351/17,28/+	0.972876	1	7753172	7753188	1	AGCTGATCGTAATCTGA	7753324	7753351	1	GAACTTGGAGGTGAAGATTGCTCCGAGG	7753189	7753323	AAATGCAACAACAACAACAACAACAAAAATAATGAGAAAGCAAGAAGACATGAAATTATTTATTGTGTAACCGTAGAAAGATTTTTTTTTTTTTGTTAAAGTAACCGTAGAAAGATTGATGAAGAAGAAGAAACA	GAACTTGGAGGTGAAGATTGCTCCGAGGCTTCAGCTTCCCGATATCCGACGGTAGTGTNNNNNNNNAGCTGATCGTAATCTGA	7753194	7753214	+	0	4821_0176
1:7803756-7803935/17,28/+	0.860923	1	7803756	7803772	1	AATCCTACAAGATAATG	7803908	7803935	1	CGAGAGATTAAAAGATGAACGTTACGCG	7803773	7803907	TATCATCATCATCATCATCATCATCATCAAACAAATAAAAATGGTTTTCAAACACGAAATAATTGAATGCAAAAAGATTAAAAAATCGATAATAAATTTACCTGTAAACATGGAAAAAGCAAACGAGTTTTCTTC	CGAGAGATTAAAAGATGAACGTTACGCGCTTCAGCTTCCCGATATCCGACGGTAGTGTNNNNNNNNAATCCTACAAGATAATG	7803774	7803801	+	0	4854_0177
1:7858441-7858620/16,29/-	0.943966	1	7858605	7858620	1	GGTAACTCAAGAGTTT	7858441	7858469	1	GTTGGATGTGTGATCAATAAGTGTTGGGT	7858470	7858604	TAAACAATGTTATTATACTTTTATATATAGTACTAAACATTATAATCCTGAAAAGCAAAATTGTTTTCTTTTGGATTAACTTGAGTTTTGAAGGAGATGAATGATGATGATGATGATGATGTGTGAGAGTTCCAA	GTTGGATGTGTGATCAATAAGTGTTGGGTCTTCAGCTTCCCGATATCCGACGGTAGTGTNNNNNNNNGGTAACTCAAGAGTTT	7858484	7858509	-	0	4906_0179
1:7873816-7873995/16,29/+	0.919443	1	7873816	7873831	1	CATATGAGGCGTAAAG	7873967	7873995	1	CGAAAAGAGAGCGAAGACTTCGTCGCATA	7873832	7873966	TAAATATTTATATATATGAAGGACGTTGATGCAATATTAAAAAAATACAGATAGCTTTCAATTTTTATTTTTCTTTCAACTGAATAAAAATATATATATATATATATATAATTTCGCGTAGGAAAAAGACATAAA	CGAAAAGAGAGCGAAGACTTCGTCGCATACTTCAGCTTCCCGATATCCGACGGTAGTGTNNNNNNNNCATATGAGGCGTAAAG	7873921	7873941	+	0	4913_0180
1:7964613-7964792/16,29/-	0.978113	1	7964777	7964792	1	CAAATCACTATACAAC	7964613	7964641	1	GGCGGCGAGGATTGTCCGGAAACGACCTA	7964642	7964776	TTCAGACTCATCTCTAGAGTTGATGAATCTATATAGAGAACAGAACATTTGAGAGAGAGAGAGAGAGAGAGAGAGAGAGAGAGAGAGAGAGAGAGAGAGAGAGAGAGAGCTTCGTACCACTATATAGAGAGCAGA	GGCGGCGAGGATTGTCCGGAAACGACCTACTTCAGCTTCCCGATATCCGACGGTAGTGTNNNNNNNNCAAATCACTATACAAC	7964668	7964726	-	10	4987_0181_SNP_a
1:7987565-7987744/16,29/+	0.942411	1	7987565	7987580	1	TCAGCTCAAACATGGC	7987716	7987744	1	GTCCAGATCCCGTATTTAGGGAAGGGTTG	7987581	7987715	CTGTTTTACAACCAAAAATAAATATTACGATGCATTAACTTAAGAGGTTCACTCACACCTGAAAATATATATATATATATATATATATATATATATATATATTTATGTTTTACTCACATATAAACCCCAAATATT	GTCCAGATCCCGTATTTAGGGAAGGGTTGCTTCAGCTTCCCGATATCCGACGGTAGTGTNNNNNNNNTCAGCTCAAACATGGC	7987645	7987686	+	0	5016_0182
1:8074858-8075037/16,29/-	0.981601	1	8075022	8075037	2	AAACAACACTCAAAAG	8074858	8074886	1	GATTAGAGTTCCGGGAACTCGTGACCGTC	8074887	8075021	TCTCTTCTTCTTCTTCTTCTTCTTCACATCGATCATCATACAACAACAAAAAATGGATTACAGAGAATCCACCGGTGAAAGTCAGTCAAAGTACAAAGGAATCCGTCGTCGGAAATGGGGCAAATGGGTATCAGA	GATTAGAGTTCCGGGAACTCGTGACCGTCCTTCAGCTTCCCGATATCCGACGGTAGTGTNNNNNNNNAAACAACACTCAAAAG	8074997	8075019	-	0	5069_0183
1:8147194-8147373/16,29/-	0.974162	1	8147358	8147373	1	CCGACACAACAGAGAT	8147194	8147222	1	GTGTGAGTATTTGAGAGAACGTGGTTGTC	8147223	8147357	TCCATTTCTGACAAGTCAATTCAGTTTTGAGTGTGTGTGTGTGTGTGTGTGTGTGTGTTTCTGACTGAATTATTAACTTCGGGTGAGAGAAATTAAGTTCTTGATTAGATTAGATACTTATATATAGGAGTGTGT	GTGTGAGTATTTGAGAGAACGTGGTTGTCCTTCAGCTTCCCGATATCCGACGGTAGTGTNNNNNNNNCCGACACAACAGAGAT	8147300	8147327	-	0	5102_0184
1:8166900-8167079/20,25/-	0.701179	1	8167060	8167079	1	CTCTTTCGTTGCCTCATTGG	8166900	8166924	1	GTTTTAAGTCGAATACGAAGATCTC	8166925	8167059	TTTTCTTTTTTTAGCTAGTTACTAATTTGGGCAAATTAAATAATAATAATAATAATAATAATAATTTGGGCAAATTTAATCTTTCTTTCATTTTGGTTTTAAGAATAAAATAAATGTATAGGAGATCGTTATTGA	GTTTTAAGTCGAATACGAAGATCTCCTTCAGCTTCCCGATATCCGACGGTAGTGTNNNNNNNNCTCTTTCGTTGCCTCATTGG	8166995	8167021	-	10	5122_0185_SNP_a
1:8200964-8201143/17,28/+	0.978479	1	8200964	8200980	1	ATCAATGGACGAAATGC	8201116	8201143	1	GCAGAGTTTGTGTTACGTATGTTTGAAG	8200981	8201115	TTTTGTCCGAAGTCTAGAGGATTCCTTGGATATCCATCTATCTATCTATCTATCTATGTTTGTGGGTGTTTTGTAAGATATCTCAAATTTTCAATAATGTGCTCTCTCTATGAAGAGATCTGAACTGCAAGTATT	GCAGAGTTTGTGTTACGTATGTTTGAAGCTTCAGCTTCCCGATATCCGACGGTAGTGTNNNNNNNNATCAATGGACGAAATGC	8201011	8201037	+	0	5160_0186
1:8321563-8321742/16,26/-	0.973125	1	8321727	8321742	1	GAGGAAAGAAGAGGTA	8321563	8321588	1	GGCCGGAGAATGAAACGTCTCCGACA	8321589	8321726	ACAAAATTGGGTTTTGGGTTGTTGTTGTTGTTGTTGTTGTGGCGAATAATAGAGATTTCGCGGTGGACTTTATTATAAACACGACGCCAAAGGTTCGCCCACAGATTATGAATTTATTTACGAGAAAATGCCACTAAA	GGCCGGAGAATGAAACGTCTCCGACACTTCAGCTTCCCGATATCCGACGGTAGTGTNNNNNNNNGAGGAAAGAAGAGGTA	8321687	8321709	-	0	5262_0188
1:8322239-8322418/16,29/-	0.76627	1	8322403	8322418	1	TGATGATCACCAACAA	8322239	8322267	1	GTCTATAACCAGTTAAGACTGAGACAGAT	8322268	8322402	GAGCTTCGACTCTATATATATATATATATATATATATATATATATATATATATATATATGAAAATACAATACCCAAACTAAAAAAGAGGAAACTGTAAATCCAAGTTAGACTTAAACTTAAGCTATAACTCTAAA	GTCTATAACCAGTTAAGACTGAGACAGATCTTCAGCTTCCCGATATCCGACGGTAGTGTNNNNNNNNTGATGATCACCAACAA	8322344	8322390	-	10	5263_0189_SNP_a
1:8332479-8332658/25,20/-	0.976618	1	8332634	8332658	1	GGCATTGGTCATTGATGTTTACAGC	8332479	8332498	1	TTGCGACCTTTGGAGTCCCC	8332499	8332633	TACACACAAATTGGGAATATTAATTAGAAAATAATTGTTTGACAAATATATATATATATATATATAGAAAATGATAATTGTGAAGAAAGGAAGAGTTTTTCACACGTGACAGACATATCAAACAATTCATATCAA	TTGCGACCTTTGGAGTCCCCCTTCAGCTTCCCGATATCCGACGGTAGTGTNNNNNNNNGGCATTGGTCATTGATGTTTACAGC	8332568	8332588	-	0	5270_0011
1:8460782-8460961/21,24/+	0.980258	1	8460782	8460802	10	CCAAAGTCTCTATAAATTCCA	8460938	8460961	6	GCGGCTGAAGATCATCATCACCAT	8460803	8460937	CTGTTTGTACCAACTGACACCTCGTTCCTATCTTACACACCTTCGTGTAGGTAGTTGGATCAAAGTACATAACTTCTGGCGGCAATGGTTGATTATCATCATCATCATCATCATCATCATCATCCTGCATATTCT	GCGGCTGAAGATCATCATCACCATCTTCAGCTTCCCGATATCCGACGGTAGTGTNNNNNNNNCCAAAGTCTCTATAAATTCCA	8460897	8460926	+	0	5345_0190
1:8484886-8485065/18,25/-	0.981921	1	8485048	8485065	1	GAGAAGTAAAGGTGAGAG	8484886	8484910	1	CATTGAATGGAAGGAGATTTCAGGG	8484911	8485047	CTTTTCTGTGTCAAAGATTTGGCAATGGTCTAATAAGAGATCAAAGTTTCCTAATAATCATCCATCAGAGACTAATCTTGTGGTTGGTGGTTCTTCTTCTTCTTCTTCTTATGTTTGTTCTGGATCTGATGGGTTAT	CATTGAATGGAAGGAGATTTCAGGGCTTCAGCTTCCCGATATCCGACGGTAGTGTNNNNNNNNGAGAAGTAAAGGTGAGAG	8484938	8484957	-	0	5371_0191
1:8493913-8494092/25,20/-	0.89328	1	8494068	8494092	1	CTCTGTGGGAAATATGAATGAAATG	8493913	8493932	1	CGTTTGGCATTTTGGGGTGT	8493933	8494067	TGGAAGAGTTGATTATTTACTTGATATATAGAATAATCTAACAACTTAAAATGAAATTGAACCTAATATATATATATATATATATATATATATATATATGTGTGTGTCGACGTTTTATTTTAGTATCTTTATTTA	CGTTTGGCATTTTGGGGTGTCTTCAGCTTCCCGATATCCGACGGTAGTGTNNNNNNNNCTCTGTGGGAAATATGAATGAAATG	8493969	8494002	-	0	5389_0012
1:8541140-8541319/19,26/-	0.930377	1	8541301	8541319	1	TATAGCGCGTCAAGCCTTT	8541140	8541165	1	ACAGGTAGAAGACTCACCGAGTTTGC	8541166	8541300	AATTAGGCTTAGTACCTTCAAAAACAATTTGTCTATAAGCTATATTGAACTAGCTAACTAATAAAATATAACAGTACATGACTACATGACTCAAAAGTAATCTATTTATATATATATATATATATATATATTTAT	ACAGGTAGAAGACTCACCGAGTTTGCCTTCAGCTTCCCGATATCCGACGGTAGTGTNNNNNNNNTATAGCGCGTCAAGCCTTT	8541165	8541198	-	10	5427_0192_SNP_a
1:8558765-8558944/16,25/+	0.975813	1	8558765	8558780	1	GATGGAGAGATAAGGA	8558920	8558944	1	CGCGTGAGACGTCATTAAGGCTTAG	8558781	8558919	AAGAGGAAGAAGAAGAAGAAGAAGAAGAAGAAAGATTGGTTATGAAAGAGTCATTTTTGCTCATTGTCATTGCCTTTAACTTTTGATGATTTTGTTTTCCTAAATTAGGAGAATACGAATCACGCGCGTATTAAAAAAA	CGCGTGAGACGTCATTAAGGCTTAGCTTCAGCTTCCCGATATCCGACGGTAGTGTNNNNNNNNGATGGAGAGATAAGGA	8558781	8558812	+	0	5442_0193
1:8595904-8596083/17,28/-	0.911319	1	8596067	8596083	2	GCTGACATGTTTATATG	8595904	8595931	1	GAATTGCTTGCAAGGAAAGAGAGAGAGA	8595932	8596066	TACTTTGAGAGAAGTGTTGTGAGATTTGTACAAATGTATATGTACACTTTAAAAAGCAATATAAGATAGATAAAAAAAATATAAAGAAAAAAAGAAAGAAAGAAAGAAAGAAAGAGAGAGGCTCATATATATATA	GAATTGCTTGCAAGGAAAGAGAGAGAGACTTCAGCTTCCCGATATCCGACGGTAGTGTNNNNNNNNGCTGACATGTTTATATG	8595948	8595984	-	0	5472_0194
1:8655224-8655403/16,29/+	0.980601	1	8655224	8655239	2	CCACAAAATCTTAAAG	8655375	8655403	1	CGGTATCGGGAAGGCCATACTTGGATTCA	8655240	8655374	AGAGACGAAGAAGATGGATTCTGGACTATCATGGGCTGATCAATGGGATTACAACTCTGATCCTCCTCCAAATTCAAGTAACGAAGACGATAAGAAGAAGAAGAAGAAGAAGAAGAAGGAAGATGGAAGCAAAAG	CGGTATCGGGAAGGCCATACTTGGATTCACTTCAGCTTCCCGATATCCGACGGTAGTGTNNNNNNNNCCACAAAATCTTAAAG	8655331	8655362	+	0	5520_0195
1:8674455-8674634/19,26/+	0.86056	1	8674455	8674473	1	ACATAGTTATCGACATTAT	8674609	8674634	1	ATTGTATCTAGGTGTGTGTTTGTCAG	8674474	8674608	GTGTGTGTGTGTGTGTGTGTGTGTATTAATACTAGTACACGATTGCAATATTGAATAAATATTCTTGTTTCAACGACCAGGGTAAATATACCATTACTCAATATGAATCATTTCAAATAGTACACAATTACACTT	ATTGTATCTAGGTGTGTGTTTGTCAGCTTCAGCTTCCCGATATCCGACGGTAGTGTNNNNNNNNACATAGTTATCGACATTAT	8674473	8674497	+	10	5535_0196
1:8726788-8726967/16,29/+	0.981444	1	8726788	8726803	1	AGTTCTTGAATTCGGA	8726939	8726967	1	GTTTGGAGGGTACTGTGCTTACGAGATCT	8726804	8726938	CAAGAATCAGCAAGTCCGTAGCATAAAGAAGACCAATCTAAATGAAGCTTTAAAGTTTTAATCCAAGGAAGTAGTAAGGATAATATAAACAAGAATCGAAGATCAGAGAGAGAGAGAGACAGAGAGAGATAAGAA	GTTTGGAGGGTACTGTGCTTACGAGATCTCTTCAGCTTCCCGATATCCGACGGTAGTGTNNNNNNNNAGTTCTTGAATTCGGA	8726908	8726932	+	0	5572_0197
1:8727056-8727235/18,27/+	0.981585	1	8727056	8727073	1	GTGTTTACCAGAAATGGG	8727209	8727235	1	GCAAATGTTGGAGAGATGGAGATGGTG	8727074	8727208	TCAATTCACATGTAGAGAAAATAAAGACAGATAGAAGAGATAGGATTGGTGAAGAAGAGCATAAGAATAAGAGGTACTGAGAGAGAGAGAGAGAGAGAGAGAGAGAGAGAGTTATGTTTAAACAAATGTGGAAAC	GCAAATGTTGGAGAGATGGAGATGGTGCTTCAGCTTCCCGATATCCGACGGTAGTGTNNNNNNNNGTGTTTACCAGAAATGGG	8727152	8727184	+	0	5573_0198
1:8738754-8738933/23,22/+	0.941535	1	8738754	8738776	1	GGACTAGATTTTAACATAATGAG	8738912	8738933	1	CGGTTGAGAACGGGAATGGAGC	8738777	8738911	TTTATAAAGAAGAAGAAGAAGAAGAAGATGAGATCGTTAAGACATTCGAGTTTCTGAAAAGATGACTGTAAGTCAGATCAAATTTCCAATTGCTCATGGATCTGTTATGACTTTCTCTAATCGTGCTCATTATTC	CGGTTGAGAACGGGAATGGAGCCTTCAGCTTCCCGATATCCGACGGTAGTGTNNNNNNNNGGACTAGATTTTAACATAATGAG	8738783	8738804	+	0	5578_0199
1:8757834-8758013/18,27/+	0.970433	1	8757834	8757851	1	TACACTTGTCGAGCTGTT	8757987	8758013	1	TGCTTCCGCCCTCTAAATTGCTTCCGC	8757852	8757986	AATATCATTACTAGGCCACTACTTTTACAGATTCTCTTTAAAAAGAGTAATAGAGACATGTAAGTTCGTGTGTTACAAAGCTTTTAAAGTTGAAGGCGTCGAGAGAGAGAGAGAGAGAGAGAGCTATGGAGAAAC	TGCTTCCGCCCTCTAAATTGCTTCCGCCTTCAGCTTCCCGATATCCGACGGTAGTGTNNNNNNNNTACACTTGTCGAGCTGTT	8757952	8757974	+	0	5590_0200
1:8845079-8845258/16,29/+	0.98004	1	8845079	8845094	2	TAAAACTAAACGAAAA	8845230	8845258	1	GATGAAGCTGTGGAAACGGGCTTCCGGTG	8845095	8845229	ACCGGTTACAACGGTCAAAAGCAAGGGTGGCAAAATAATTAAAACTTAAAATAGAGAAAACAATGTAAGCTTTGGTTTTAGAGGAAGAAAAGAGAAGAAAAAGCGAAGAAGGAGGAGGAGGAGGAGGAGGCTGAT	GATGAAGCTGTGGAAACGGGCTTCCGGTGCTTCAGCTTCCCGATATCCGACGGTAGTGTNNNNNNNNTAAAACTAAACGAAAA	8845204	8845224	+	0	5673_0201
1:8853261-8853440/16,29/-	0.784233	1	8853425	8853440	1	ACGGGTTCTCTCATTT	8853261	8853289	1	GTTTCTTGTTTTCTATCCGCAGATAATGC	8853290	8853424	TAAACAAGTATAAGTATACTATTATGTCTTAATATATTTCCTTAACATTACATATATATATATATATATATATATATAAAATCGAAAATACGATATTCTCTCATTTAAATATACTCAATCAAATATCAACTTTCT	GTTTCTTGTTTTCTATCCGCAGATAATGCCTTCAGCTTCCCGATATCCGACGGTAGTGTNNNNNNNNACGGGTTCTCTCATTT	8853347	8853373	-	0	5675_0202
1:8882403-8882602/17,28/-	0.829233	1	8882586	8882602	1	AAAACACAAATGGTCCA	8882403	8882430	1	GTGATGATCGCTCGTAGATCATTAATGC	8882431	8882585	AATTTTTTAAATAATAATAATAATAATAATAATAATAATAAAACAAAAGTTTTACCAAAAACAATGTAAGTATTTCCGGCAACTAGCCGAGATAGCCGCTTAATGTTAAGTCGTCGTACTTAAGTTTTGTCCGATAGCCTAATAATGCAAAACTT	GTGATGATCGCTCGTAGATCATTAATGCCTTCAGCTTCCCGATATCCGACGGTAGTGTNNNNNNNNAAAACACAAATGGTCCA	8882545	8882576	-	0	5709_0013
1:8897874-8898053/17,28/-	0.968854	1	8898037	8898053	1	CAGAATAAACCAAGGTA	8897874	8897901	1	GGAATTGAGGGTCAAGTTCTTGAGAAGC	8897902	8898036	TAATCATCAATCATCATCATCATCACGGATTTGAAAAGCTTGAGACTTTTTTAGTTTGAGAGATTCTGATTCATTGTTGCTTTTACAGAATCTGCAGAGATGATGATGATGATGATGATGAATTTGTGTAATTCT	GGAATTGAGGGTCAAGTTCTTGAGAAGCCTTCAGCTTCCCGATATCCGACGGTAGTGTNNNNNNNNCAGAATAAACCAAGGTA	8897916	8897938	-	0	5717_0204
1:8957872-8958051/22,23/+	0.98157	1	8957872	8957893	1	GTTGAGAGAGAGAGAAGTGAGG	8958029	8958051	1	GGATAAGCAGTGGTCGTTTTCAG	8957894	8958028	GAGAATAGTCAATGAGAGGAAAAGAAAAGAAACGTGAATCAAAGAAGAAATATGAAAAACGATGAGAGAAGAGAGTGAGGCAAAGAAGTTTTGTCAGAGCGGTTCTTCTTCTTCTTCGTCTTCTTCCTTTTTATT	GGATAAGCAGTGGTCGTTTTCAGCTTCAGCTTCCCGATATCCGACGGTAGTGTNNNNNNNNGTTGAGAGAGAGAGAAGTGAGG	8957996	8958019	+	0	5747_0205
1:9015777-9015956/17,28/-	0.974267	1	9015940	9015956	1	GGGATCTCAAAAAAACA	9015777	9015804	1	CAGATGGCCGGAGCTCAACTATAGCCGC	9015805	9015939	ATTTGTTGAAATCAGATTAAGATGTGAAAAGCACATGAGGGAGGAGATCATGATGATGATGATGATGATGGTAAACACTAATCAGTCTATGGAAAGTCCACCAAAATGTTGTCGCATAATAATATCATCCATCAT	CAGATGGCCGGAGCTCAACTATAGCCGCCTTCAGCTTCCCGATATCCGACGGTAGTGTNNNNNNNNGGGATCTCAAAAAAACA	9015870	9015894	-	0	5787_0206
1:9023638-9023817/16,27/+	0.98045	1	9023638	9023653	8	TCTTTGTTTTCCTTGA	9023791	9023817	1	GCATGAGGAGGGATCATCACTACCTTC	9023654	9023790	ACCAGGCAACCATCTGTGTATCAGAATCGCTGCAGATCAAAACCCCAAGTTCTTGATAAAATATTCAAGAAAGAGAGAGAGAGAGAGAGAGAGAGAGAGAGAGAGAGAGAGAGAGAGAGAGGAAATCTTCAAAAGGG	GCATGAGGAGGGATCATCACTACCTTCCTTCAGCTTCCCGATATCCGACGGTAGTGTNNNNNNNNTCTTTGTTTTCCTTGA	9023721	9023774	+	0	5791_0207
1:9023825-9024004/16,29/+	0.981774	1	9023825	9023840	2	ACAAGAATGAAGCCAA	9023976	9024004	1	GATTAGGCAGGAAGAGAGCCCAGTACAGA	9023841	9023975	TCACCATCAGCAGAGGATGAAGAGTCTACAAGGGTATAAAAACTTTATTAGAGAGAGAAAGAGAGAGAGAGAGAGAGATCCAATTTGATATCAACGAGGAAGGGAGTGTGATAGTTACAGAGTAGCTGAGTCCTA	GATTAGGCAGGAAGAGAGCCCAGTACAGACTTCAGCTTCCCGATATCCGACGGTAGTGTNNNNNNNNACAAGAATGAAGCCAA	9023890	9023918	+	0	5792_0208
1:9027572-9027751/19,23/-	0.98068	1	9027733	9027751	1	CCCCAAATTAGAGTAAACC	9027572	9027594	1	GCTGTGATTTCGTCGGCGAAGAG	9027595	9027732	CTAATTGTGTATCTGTAGCTTTCTCTCTCTCTCTCTCTCTCTCTCTCGCGAAGAAGAAGAAGAAGAAGGAGATCAAGGAACTCGAAGTGTGTGTGTGTGTGTTTGCCTTCTCTTGTCTTTTAGTTTTTTCTCTCTTTG	GCTGTGATTTCGTCGGCGAAGAGCTTCAGCTTCCCGATATCCGACGGTAGTGTNNNNNNNNCCCCAAATTAGAGTAAACC	9027686	9027711	-	0	5794_0209
1:9144864-9145043/16,26/-	0.980342	1	9145028	9145043	1	GGGGATTGTGAAACTG	9144864	9144889	1	GAGAATGTAAAGGAAGGGTCTGCAGC	9144890	9145027	TGACCCCTGAAGAGTGCCAGAGACTATTTGGAGGTGAAAGTTTGACATACATAATTGTCTGATAGTGTTAACAAGATCACTCATCTTCACTTCTTTAGTTTTATAGTAGAAGAAGAAGAAGAAGAAGAAAAAGAGATG	GAGAATGTAAAGGAAGGGTCTGCAGCCTTCAGCTTCCCGATATCCGACGGTAGTGTNNNNNNNNGGGGATTGTGAAACTG	9144894	9144920	-	0	5863_0211
1:9316443-9316622/19,25/+	0.981409	1	9316443	9316461	1	GCTCTCTTCTTTGTGGTTT	9316598	9316622	1	GGGACCTGGAGTCTTGACGATACGG	9316462	9316597	GATACACCAATTTACCTCCTGAAATCAACAATCCCAACACACATTACACTATGAAGAACAGATCGGTGATTAGAGAATTATGAGACTAAAGCAGAGGAGATTGAAGATATCAAGGAAGAAGAAGAAGAAGAAGAAA	GGGACCTGGAGTCTTGACGATACGGCTTCAGCTTCCCGATATCCGACGGTAGTGTNNNNNNNNGCTCTCTTCTTTGTGGTTT	9316576	9316596	+	0	6008_0212
1:9321539-9321718/23,21/-	0.980245	1	9321696	9321718	1	TTCGTCCCATCGCGTTGATTGTT	9321539	9321559	1	CCCATTAAGGAACTAAAGCCC	9321560	9321695	GTTTCGAATCCTAGAAATGAAGAAGAAGAAGAAGAAGAAGAAGAAGAAGAAGAAGAAAGGCGTAACTTTTTTAAATAAGAAGAACAAAGAGCCCTAATTCTCTTTGCCACGTAACTGGATTTGGACCAAAATAAGG	CCCATTAAGGAACTAAAGCCCCTTCAGCTTCCCGATATCCGACGGTAGTGTNNNNNNNNTTCGTCCCATCGCGTTGATTGTT	9321639	9321677	-	0	6016_0213
1:9329352-9329531/18,25/-	0.980443	1	9329514	9329531	1	GTGAGGGTGATAAGCGAG	9329352	9329376	1	GCATGTCAGGAGGAAGAAACATGTG	9329377	9329513	ATAGAGTCATAGAGAGTGAAATGTATATATATATATATATATATATTATATAGAGAGATTATTTGGTCAAAATAGCTATTTATATTGTATAGTATTAAAATAATAATGTGATTTAGTATTATTTTAAATTGCTTCGT	GCATGTCAGGAGGAAGAAACATGTGCTTCAGCTTCCCGATATCCGACGGTAGTGTNNNNNNNNGTGAGGGTGATAAGCGAG	9329462	9329490	-	0	6020_0016
1:9341414-9341593/16,29/-	0.949298	1	9341578	9341593	1	CAAAATGGTGGGTTGC	9341414	9341442	1	GTCAGTGTGTGGTAACAATGATGCTGTAT	9341443	9341577	CACCTAATCTGATTTTCTAAAATCAGTATATTGGGCTTTTTAAATTCTTCTTATCTTTTATGTGTGTATATATATATATATATATATATATATATATATATATTTACACGTTTATGTACGCCTGTATTTATGTGT	GTCAGTGTGTGGTAACAATGATGCTGTATCTTCAGCTTCCCGATATCCGACGGTAGTGTNNNNNNNNCAAAATGGTGGGTTGC	9341475	9341511	-	0	6034_0214
1:9408611-9408790/20,24/+	0.974951	1	9408611	9408630	1	GGGGAAATGAGCGAATAGTG	9408767	9408790	1	GTCGTTGCTAGCTGGATTAGAGCG	9408631	9408766	ATAAGAAGAAGAAGAAGAAGAAGTGAGAGATATGGTTATTTTATATGTGTGGTGGATCTGACACTGGACTGGTCTAAATTGGGTTTTTTAGTTTTTTACGGTTACGCGGACTAGGTAAGGTAAGAAATCTGGAAAA	GTCGTTGCTAGCTGGATTAGAGCGCTTCAGCTTCCCGATATCCGACGGTAGTGTNNNNNNNNGGGGAAATGAGCGAATAGTG	9408633	9408653	+	0	6095_0215
1:9483752-9483931/16,29/+	0.983021	1	9483752	9483767	1	AGGGGAAAGAAGATGT	9483903	9483931	1	GAACAAAATAACCCATGTACTTCTCTCGG	9483768	9483902	CATAACCGGAGAAGAAGAAGAAAAAGAAGAAGAATCTGCAGATTCTTCACCATCCAAAGGAAAAAGCGAGGGCCAGAGACAATTGGAAGAAAGTATAGAAGAAATAGCTAAAGACATCAAGAAGGTGAAGAAGCA	GAACAAAATAACCCATGTACTTCTCTCGGCTTCAGCTTCCCGATATCCGACGGTAGTGTNNNNNNNNAGGGGAAAGAAGATGT	9483777	9483801	+	0	6144_0217
1:9487122-9487301/17,28/-	0.982403	1	9487285	9487301	1	AAGAGAGCGAATAAAGC	9487122	9487149	1	GGAAGACAAATGTCTGCTTCCTTCTCTC	9487150	9487284	AACGAGAAGAAGAAGAGGAGCTGGAGACTTGAGTGAATTATCAAATGGAGAAACTTAAGAAAGAGGAGCAGAAGTAGTAGTAGAAGAAGAAGAAGAAGAAGAATCTATCATCGGAAAAGATGAGAAGAATATGGT	GGAAGACAAATGTCTGCTTCCTTCTCTCCTTCAGCTTCCCGATATCCGACGGTAGTGTNNNNNNNNAAGAGAGCGAATAAAGC	9487182	9487215	-	0	6145_0218
1:9556396-9556575/20,24/-	0.980349	1	9556556	9556575	1	TTGTTGGCAGTGATGACGCT	9556396	9556419	1	CTAAGCTTGTCATCGGAGGGGTTC	9556420	9556555	ACTGAAGAGCTGGTTGGAGAAGGCACTGAGGAAACAAATTCTTCTGATGATGAAGAAGAAGTAGAAGAAGAAGAAAATGACAGTATTGAAGCAATCTCATCTATGGATAGTGCAGATTATGGAAAGCATTCAAACA	CTAAGCTTGTCATCGGAGGGGTTCCTTCAGCTTCCCGATATCCGACGGTAGTGTNNNNNNNNTTGTTGGCAGTGATGACGCT	9556481	9556504	-	0	6180_0219
1:9578025-9578204/16,29/-	0.895549	1	9578189	9578204	1	ATCCCAACATACAGTC	9578025	9578053	1	GTGACCATTCTATCCATCGTTTGATGTCC	9578054	9578188	ATAAGTATATATATATATATATATATATATATATCTATATATATATATATATACATCCAGTTCACAAAAACCAAATAAATTTTTCTTCAAGTATTTTTCTGCGTTACTTGGAAAAAACATTTCTAACTAGTAGAG	GTGACCATTCTATCCATCGTTTGATGTCCCTTCAGCTTCCCGATATCCGACGGTAGTGTNNNNNNNNATCCCAACATACAGTC	9578136	9578183	-	0	6204_0220
1:9617116-9617295/22,19/+	0.929298	1	9617116	9617137	1	CATCAAACAAAACATGTCATTG	9617277	9617295	1	GCCGTCTTCGCTTGAGTGG	9617138	9617276	TTTATTCTTACTTTACATTGACTGAATAGTCTGAATTAACATAATATATATATATATATATATTTACGGAATTTTATCATATGAATTCTCAGTTATGGAGATTAGTAGTTCAATAGATTGGCCACGTGGAGAAGTCTTT	GCCGTCTTCGCTTGAGTGGCTTCAGCTTCCCGATATCCGACGGTAGTGTNNNNNNNNCATCAAACAAAACATGTCATTG	9617178	9617200	+	0	6226_0017
1:9622180-9622359/20,25/+	0.980225	1	9622180	9622199	1	TTTTTGTGTGGTTTTCTGGC	9622335	9622359	1	CAAGACTTTCCTTTACAATGGCCTC	9622200	9622334	AGGAATAGTGTGAGCTTGAGTCATAATTATAACAATGAGATGTTAAACACAAGAGCTCACAACAACAACAACAACAACAACACAAGTGAATGTATGAGTCTCTCCAGCATCCACAATCACTCCTTGATCCAACAA	CAAGACTTTCCTTTACAATGGCCTCCTTCAGCTTCCCGATATCCGACGGTAGTGTNNNNNNNNTTTTTGTGTGGTTTTCTGGC	9622258	9622284	+	0	6236_0221
1:9623021-9623200/17,28/-	0.963838	1	9623184	9623200	1	GGTAACTAGGCCGTAGT	9623021	9623048	1	CTAACTTCACGAGATTCACCGTCAGACC	9623049	9623183	ATTTTATGAAACAGTAATATTAAACTACATTTTAGAATTAAGAAATGAGGGTATATATATATATATATATATATATATAGTGAATCTATGTTACATAATAGAAATAGAGCCCTAAACGTAATGTTTTCAGATGCA	CTAACTTCACGAGATTCACCGTCAGACCCTTCAGCTTCCCGATATCCGACGGTAGTGTNNNNNNNNGGTAACTAGGCCGTAGT	9623105	9623132	-	0	6238_0222
1:9756696-9756875/18,22/-	0.980436	1	9756858	9756875	1	TGAAAGCTATGGAGGGGA	9756696	9756717	1	GTGGTGGAGGTTGCGGCGGTGG	9756718	9756857	CTCTAGCGACCCGATAATTTTCATTGACAATCGTCGAGACTGTGGCAGTGTTGGTGATGGTGATGGTGATGTTGATGTTGATGTTGATGTTGATGTTGATGATGGTTTTAGTGGTAGTAGTGATGGTGGTGCTAGTTGTG	GTGGTGGAGGTTGCGGCGGTGGCTTCAGCTTCCCGATATCCGACGGTAGTGTNNNNNNNNTGAAAGCTATGGAGGGGA	9756757	9756803	-	0	6330_0223
1:9774291-9774470/16,29/+	0.978151	1	9774291	9774306	1	CCTAAAAGAACCTGGA	9774442	9774470	1	ATTTGACTTCGAGGGAGGCCTTGTTCTTG	9774307	9774441	TTTGAAGTTTTCTACCAAAACTTCTTCAGCCTTACCAATAATGGAGTTTTCTTCGATTATAACTTATAAGTGAAGAAGAAGAAGAAGAAGAAGAAGTTAAAACAATAAAGATCATACCGGGTGGATCAGCCAAGT	ATTTGACTTCGAGGGAGGCCTTGTTCTTGCTTCAGCTTCCCGATATCCGACGGTAGTGTNNNNNNNNCCTAAAAGAACCTGGA	9774378	9774402	+	0	6339_0224
1:9851746-9851925/19,24/+	0.980403	1	9851746	9851764	1	CGAAGAAGCGCCAATTGAT	9851902	9851925	1	TTTCCGGCGAGATCCTCCGCCTTC	9851765	9851901	GAACACTAACTTAACCAGAAGGGGCATAACCAATACCATCGTATTCTCCAAGAGACGGTAATCAGATTAATTGGTAATTCATCTAATCGAGGGGGAAGAAGAAGAAGAAGAAGAAGCGCTTACAGTGCTGCCAAAAA	TTTCCGGCGAGATCCTCCGCCTTCCTTCAGCTTCCCGATATCCGACGGTAGTGTNNNNNNNNCGAAGAAGCGCCAATTGAT	9851859	9851880	+	0	6396_0225
1:9887303-9887482/16,29/-	0.983788	1	9887467	9887482	4	CAAAAACAAAACACAG	9887303	9887331	1	GCAACAACAGTTGCGGTATGAGCAGTAGC	9887332	9887466	TTTCTCTCTCTCTCTCTCTCTCTCTCTCTCTCTCTCTCTCTCTCTCTCTCTAAAAGCTCTCTTCTCTTACAATGGAGAATTCACCGAGATACAGAGAAGCGACGAATCTGATTCCGTCGCCGAGATGTCACAACA	GCAACAACAGTTGCGGTATGAGCAGTAGCCTTCAGCTTCCCGATATCCGACGGTAGTGTNNNNNNNNCAAAAACAAAACACAG	9887416	9887464	-	0	6431_0226
1:9899746-9899925/16,27/+	0.980573	1	9899746	9899761	1	TGTTGTGAAGTGCGAG	9899899	9899925	1	GAGAGGTCGTTGGGGAGATTGATTAGG	9899762	9899898	CGATTGTTGTTAGGATCCATAGAGAGTTCTTGGACAGAGTTTGCGTTAGAAGAGGGAAAGGGTAAGAAGTTATCCATTTTTCCCGGAGAGAGAGAGAGAGAGAGGGAGAGAGATCTGAGTGAAGAAACAAAAAAAAA	GAGAGGTCGTTGGGGAGATTGATTAGGCTTCAGCTTCCCGATATCCGACGGTAGTGTNNNNNNNNTGTTGTGAAGTGCGAG	9899847	9899874	+	0	6456_0227
1:9902914-9903093/16,29/+	0.710994	1	9902914	9902929	1	TCGTAAGATGACATAT	9903065	9903093	1	GCTCAAATCTTTAGATGAGGTTCGACAAT	9902930	9903064	AAGTTTTTGGAGAATTCTTAACAAAATGTTGTAAGAGTACATATCACCAACTATATAGTCTTCTATGTAAAAAAATCATGAACTCAAAGATATATATATATATATATATATATATATATATATTTTGTTATTGAA	GCTCAAATCTTTAGATGAGGTTCGACAATCTTCAGCTTCCCGATATCCGACGGTAGTGTNNNNNNNNTCGTAAGATGACATAT	9903019	9903052	+	0	6461_0018
1:9969186-9969365/18,27/-	0.982131	1	9969348	9969365	1	GAAGGGAGATTATGTTCC	9969186	9969212	1	GAACATCACACGTGGCCAGCGTAGTAG	9969213	9969347	AAAATTGAATACAGCAAGCAGCTAGATTTTGACTTTCATACTATTATGTATTTAAATCGGAAACCAGAATTATGGTTTGAAGAACAAGAAGAAGAAGAAGAAATAACACCACAAAGGAGCCAGAAGTCAAAGCCT	GAACATCACACGTGGCCAGCGTAGTAGCTTCAGCTTCCCGATATCCGACGGTAGTGTNNNNNNNNGAAGGGAGATTATGTTCC	9969246	9969269	-	0	6506_0228
1:9979655-9979834/20,25/-	0.967318	1	9979815	9979834	1	CCAAAAACGTAAAAAAATAA	9979655	9979679	1	CCACTCATCTCAATTTCAACCTCCT	9979680	9979814	AAATAAAAAGAAGTAGAATATATAAGAGTAAGAATAAGAAGAAGAGGAAGAACAAACAATAATAATAGTAAAATCGATAAAAACCAAAAAGGAAGAAAAACAACAACAGGGCTTCTAGTAGTAGTAGTAGTAGTA	CCACTCATCTCAATTTCAACCTCCTCTTCAGCTTCCCGATATCCGACGGTAGTGTNNNNNNNNCCAAAAACGTAAAAAAATAA	9979680	9979699	-	0	6518_0229
1:10019122-10019301/22,23/-	0.980208	1	10019280	10019301	1	GGTACAGGACATGTTTATGAAG	10019122	10019144	1	TGAAGCCCCAACAAAGCATATCG	10019145	10019279	CACCAAGAGAGAGAGAGAGAGAGAGAGAGAGAGAGAGAGAGAGAGAGAGAGAGAGAGAGAGAGAGAGAGAGAGAGAGAGAGAGGAGACTATATATATAGTTTTAAAATATAATTACCTGCAAAATATTGAAACGA	TGAAGCCCCAACAAAGCATATCGCTTCAGCTTCCCGATATCCGACGGTAGTGTNNNNNNNNGGTACAGGACATGTTTATGAAG	10019193	10019274	-	0	6545_0230
1:10074535-10074714/19,26/-	0.970996	1	10074696	10074714	4	TGCTTTCGACTGGTCCTGC	10074535	10074560	1	CGGCAAGACTTGACTAATGACAAAAC	10074561	10074695	CTTGGCTCTGGTACAGTGGATACATAAAGGGTATTCTTTCAGCAGTAAGAATTCATTCGTTGTAAAAAATCAAAGAGGAAGAAAATTATGTGATGATGATGATGATGATGATGATTAACAAAAACATTGCTTGTA	CGGCAAGACTTGACTAATGACAAAACCTTCAGCTTCCCGATATCCGACGGTAGTGTNNNNNNNNTGCTTTCGACTGGTCCTGC	10074581	10074608	-	0	6582_0231
1:10114296-10114475/16,29/-	0.920615	1	10114460	10114475	2	CTAATACAATATCACC	10114296	10114324	1	GCATTAGGGTTTTCATCACTGAACAATTG	10114325	10114459	TCATCATCATCATCATCATCATCATTGGTTTAAGTATAACTGATATTGATAGTTATACTGTATAATTTCATATGTAGTGTATATATGAACAATATTACAAACATATACAACTCATGTAACTAGACAATGCGACAA	GCATTAGGGTTTTCATCACTGAACAATTGCTTCAGCTTCCCGATATCCGACGGTAGTGTNNNNNNNNCTAATACAATATCACC	10114435	10114459	-	0	6610_0232
1:10206474-10206653/19,26/-	0.965364	1	10206635	10206653	1	CTTATAAATCTTCCTGCCG	10206474	10206499	1	GCTATTGAATGAGATTGTCGTCACAG	10206500	10206634	CTGCTTCTTCTTCTTCTTCTTCATTCTTCAAGGTTGATTGTTGTCACAATCATGCACATTCTAGTGAATTGGGTCTGTGAAATGATTCACCTCCACCTTTTCATTCTTTCCACCCTTCTTCTTCTGTATGTACTT	GCTATTGAATGAGATTGTCGTCACAGCTTCAGCTTCCCGATATCCGACGGTAGTGTNNNNNNNNCTTATAAATCTTCCTGCCG	10206606	10206631	-	0	6686_0233
1:10283016-10283195/16,29/-	0.975767	1	10283180	10283195	2	TGGAGAGGGTTTCGTT	10283016	10283044	2	GCAGCTTACGGCGGATAAATATGAGCAGC	10283045	10283179	TTCTACAGAGAGAGATATATCTTCCCTTGAGCTTCCTTGGTGTTCTTCGTATTGTCGTCGCGACTGAGAGAAGGCCACAAAAGCTTCGTTTATTTCCTTCAGATCCGATATAGTGAGAGAGAGAGAGAGAGAGAG	GCAGCTTACGGCGGATAAATATGAGCAGCCTTCAGCTTCCCGATATCCGACGGTAGTGTNNNNNNNNTGGAGAGGGTTTCGTT	10283045	10283065	-	0	6770_0234
1:10307883-10308062/18,27/-	0.977024	1	10308045	10308062	1	AGTAAAGATGATCAACAC	10307883	10307909	1	GGGCTGTTTCGTGGTTTACACGGTTGA	10307910	10308044	TAAGAAACTACTCAAGATGGCCAAGAAATGGCAACAAAGAGCTGCCCTCAAGAGGAAAAGAATCTCATTCCAAAGATCAACTACTACTACTACTACTACTACTACTACTACTAGCAGCTCAACTGCTGTGGAGAA	GGGCTGTTTCGTGGTTTACACGGTTGACTTCAGCTTCCCGATATCCGACGGTAGTGTNNNNNNNNAGTAAAGATGATCAACAC	10307932	10307965	-	0	6782_0235
1:10327476-10327655/16,29/-	0.971384	1	10327640	10327655	9	TGTTCTGTTTCTTCTT	10327476	10327504	1	CAGGAGGTTCTTACAACGCCGCATAATCT	10327505	10327639	TTGGAAGAAGAGGAAGAATGAAGCCAACACTTTGGTCCCTTGCTTCCCAGATGATGATGATGATGATGAAGAAGAAGCTTTCCGAAGTTTCAAATGCCGGTAATGGTGTCTGGGACAGCTCCTGGTGATTCTGAT	CAGGAGGTTCTTACAACGCCGCATAATCTCTTCAGCTTCCCGATATCCGACGGTAGTGTNNNNNNNNTGTTCTGTTTCTTCTT	10327571	10327590	-	0	6801_0236
1:10343611-10343790/17,28/-	0.908228	1	10343774	10343790	3	GAAATAAAATCAAAGAA	10343611	10343638	1	GCGTCGTTGACTAGCCTCCAAATGAGGG	10343639	10343773	TAGTTTGGTTCTTCATATTCAATTTGAAAATCATGTTTCCATAACATTGATTGGTCGCGAATAATAATAATAATAATAATAATTTTCATAACAATATTTGACTATGTAACTTTTAAGTATAGGCAATTCAGTAAT	GCGTCGTTGACTAGCCTCCAAATGAGGGCTTCAGCTTCCCGATATCCGACGGTAGTGTNNNNNNNNGAAATAAAATCAAAGAA	10343691	10343714	-	0	6815_0237
1:10468055-10468234/19,25/-	0.982099	1	10468216	10468234	1	CGAGGATTGGATTTGGAAG	10468055	10468079	1	CGAGAGAGAGGGTTTTAGGGTTTCT	10468080	10468215	AAGCGAAAATGGAGGAACAATTGGAAGAGAGTTCTAAGCAATGGTTTCTCATTTTTGCTTCTTCTTCTTCTTCTTCTTCTAAGTTTTGCCTGTGTCGGCTCTGTAACTGGAGACTGCTGCAGAAGAGAGTGAGACA	CGAGAGAGAGGGTTTTAGGGTTTCTCTTCAGCTTCCCGATATCCGACGGTAGTGTNNNNNNNNCGAGGATTGGATTTGGAAG	10468136	10468158	-	0	6864_0238
1:10493866-10494045/16,29/+	0.980592	1	10493866	10493881	2	AATGAAGGTGAAGAGG	10494017	10494045	1	CGGGCAGTGCTAGTAGTAGTAACAATGAT	10493882	10494016	ATGGTGGTGATTCAGAAGAAGTCAGCACTGCTCGTACTTCTTCCAGGGATTATGGAAACACCACAGCAGAATCTTGTTGTTCCAGTTATGGTTACAACAACAACAACAACAACAACTCAAGGAAGCAGAGTTTAT	CGGGCAGTGCTAGTAGTAGTAACAATGATCTTCAGCTTCCCGATATCCGACGGTAGTGTNNNNNNNNAATGAAGGTGAAGAGG	10493975	10493997	+	0	6882_0239
1:10543518-10543697/16,29/+	0.97133	1	10543518	10543533	8	TGAAGACGAAGAAGAG	10543669	10543697	1	CGTACGATCGTAGCTTCACAAATCAGACG	10543534	10543668	CAACAACAACAACAACAACAACAAAACGACGTCATTTTCGAGCCCTCGAATCCAACCATACGCAAAAGCATAGACAAGATCACAACGTCTCTGAATCATATCGGAGATAGTTTCGAGAAAGCGTTCGAGGAAGGT	CGTACGATCGTAGCTTCACAAATCAGACGCTTCAGCTTCCCGATATCCGACGGTAGTGTNNNNNNNNTGAAGACGAAGAAGAG	10543534	10543560	+	0	6934_0240
1:10594395-10594574/17,25/+	0.874121	1	10594395	10594411	3	GTTGGGGGATTCGTTGG	10594550	10594574	2	CAGTCTTTTCTTTTCAATTGAGTTC	10594412	10594549	AAAATTAGCATTGCATTTTTGTGAGTGCTACAAGTATAGGTATATGTGTATATGTTTTCTCATCTTTAACAAAAAAATGTCTTTCACTTAATTATTATTATTATTATTATTATTTTTCAGTCTTTAAGAAATTATTTT	CAGTCTTTTCTTTTCAATTGAGTTCCTTCAGCTTCCCGATATCCGACGGTAGTGTNNNNNNNNGTTGGGGGATTCGTTGG	10594502	10594525	+	0	6983_0019
1:10655783-10655962/19,26/-	0.982287	1	10655944	10655962	1	GTTTTGCTAGCCATCACCT	10655783	10655808	1	CAAATCCCTTATATTACATACATATG	10655809	10655943	GAAGAAGAAGAAGAAGAAGAAGAAGAAGAAGAAGAAGAAGAAGAAGAAGAAGAAGAAGAAGAAGAAGAAGAAGAAGAAGAAGAAGAAGAAGAGAATCTGTAACTACAAAGATACCAAAAAAATACATAGAATAAT	CAAATCCCTTATATTACATACATATGCTTCAGCTTCCCGATATCCGACGGTAGTGTNNNNNNNNGTTTTGCTAGCCATCACCT	10655849	10655943	-	0	7048_0242
1:10679201-10679380/17,28/-	0.950648	1	10679364	10679380	1	GCCGATGGAAAAGTTAG	10679201	10679228	1	GAAGAAACCGAAGAAGTGGTTATGAGTG	10679229	10679363	TAAAATATCTAGAATTTGGTCACGAGAATTCGTTTTCCTACACTAGTAATTATGATTTTGAAAAATAAAAGAACAAGGTAATATTTGTTGTCCTCAAATAAATGTATATTTTTGTTGTTGTTGTTGTTGTTTAAA	GAAGAAACCGAAGAAGTGGTTATGAGTGCTTCAGCTTCCCGATATCCGACGGTAGTGTNNNNNNNNGCCGATGGAAAAGTTAG	10679233	10679252	-	0	7071_0243
1:10693656-10693835/18,26/+	0.857285	1	10693656	10693673	1	AGACCAAAAACATAAGAG	10693810	10693835	1	GTGTTCCCATTCCTTTTCAAGTTGTG	10693674	10693809	TTGCATTTTTCATTCGTTTAAACATTAGAGTATTTCTTTTCTTAACATTCGTTTAAACATGTGTTCCCATAACTTAATTCAATAACTTAAATTGAAATATTTATATATATATATATATATGTGTTCCCATATATAT	GTGTTCCCATTCCTTTTCAAGTTGTGCTTCAGCTTCCCGATATCCGACGGTAGTGTNNNNNNNNAGACCAAAAACATAAGAG	10693770	10693793	+	0	7086_0020
1:10817036-10817215/16,24/+	0.929727	1	10817036	10817051	1	GTCGTTGACGGGGAAA	10817192	10817215	1	AAGGACTCCGCCTACCATTACAAC	10817052	10817191	GAGAGAGAGAGAGAGAGAGAGAGATAATGAATGAGAGGTAGAGAATATTCAACCTTTGGTATGATAGTTTGAGCCCCTGGAAAGTATCTGTTAATGCGCTTAGAGACTTCTTTTCCAATGTCCCATTTCTGATTAGCGTT	AAGGACTCCGCCTACCATTACAACCTTCAGCTTCCCGATATCCGACGGTAGTGTNNNNNNNNGTCGTTGACGGGGAAA	10817051	10817075	+	10	7150_0245
1:10850034-10850213/16,29/+	0.968827	1	10850034	10850049	1	GAAGCTAGCAGAGCAG	10850185	10850213	1	GCGACATGGGAACACATGAGACGAAGTAA	10850050	10850184	GAAAGGTATTAAAAAAAAAAAAATGAGACAAATTGAAACATTTTTGATTGGAAATGTTATGTTATCATCTGGTCTGAACAATCTCTTGCGTTTGTGTGTGTGTGTGTGTGTGTGTGACAGGAGGAGGTGATGGAA	GCGACATGGGAACACATGAGACGAAGTAACTTCAGCTTCCCGATATCCGACGGTAGTGTNNNNNNNNGAAGCTAGCAGAGCAG	10850142	10850165	+	0	7168_0246
1:10860049-10860228/18,27/-	0.966791	1	10860211	10860228	1	GTTAGACACGGATCTGTG	10860049	10860075	1	TCTTTCGCAGGAAGATATCGTCGAGCG	10860076	10860210	AGATCTAGAAGAAGAAGAAGAAGAAGAAGCTAAGACAATGGCATCCATGGCAGGACCAGATCATCTCTTCAATTTGAGAAACCATTTCTACTTGGGTGCTTATCAAGCTGCGATCAACAACAGCGAGATCCCTAA	TCTTTCGCAGGAAGATATCGTCGAGCGCTTCAGCTTCCCGATATCCGACGGTAGTGTNNNNNNNNGTTAGACACGGATCTGTG	10860182	10860204	-	0	7172_0247
1:11087551-11087730/19,26/-	0.982488	1	11087712	11087730	1	TCTTTTTCTAGGCCGGTCG	11087551	11087576	1	CAGCAATATTGAAGACGTCCTGTTCG	11087577	11087711	CTACTTGATTAAGGAAATCTAAAGTAAACATGTGTAAGCACACCTAAGAAATATGTAAAACACAACTTTGGATTAGTAGTGAAATTCATAAGAATAAGAAGAAGAAGAAGAAGAAAAAAGGAATTTACGTTACTC	CAGCAATATTGAAGACGTCCTGTTCGCTTCAGCTTCCCGATATCCGACGGTAGTGTNNNNNNNNTCTTTTTCTAGGCCGGTCG	11087597	11087622	-	0	7358_0249
1:11221432-11221611/16,29/+	0.977358	1	11221432	11221447	1	ACGGGAAAACAGAAAA	11221583	11221611	1	GGAATCTCAACATTCCAAATCTTCGCCGG	11221448	11221582	TAAAAAAAGTTCCGTATACTAAAGGAAAAGAATAATAATAATAATAATAATAATATCACAAAAAAAATACGTCAGCAAAAATTCGGTTGACTCATTCTTGGTAAAACATGAACCGAAACCGGTTCAAGTCCATCA	GGAATCTCAACATTCCAAATCTTCGCCGGCTTCAGCTTCCCGATATCCGACGGTAGTGTNNNNNNNNACGGGAAAACAGAAAA	11221478	11221502	+	10	7492_0250
1:11316321-11316500/16,27/-	0.981565	1	11316485	11316500	10	TTCTCTTCTCTCTCAC	11316321	11316347	1	GCGTTCATATGTTAGTCTCATCGATTT	11316348	11316484	ACGTCGACTTTGTTCTCTCTCGGCGACGAAGCTCTCTCTCTCTCTCTCTCTCGCTTCGACCTCTCTTTCGACTCCTACTCCGGTTAGTTCTATTAGAATATGAATCCGTTGATTAGAATAAGTTCTCTCTGAAATAT	GCGTTCATATGTTAGTCTCATCGATTTCTTCAGCTTCCCGATATCCGACGGTAGTGTNNNNNNNNTTCTCTTCTCTCTCAC	11316433	11316453	-	0	7555_0251
1:11318519-11318698/16,29/+	0.825167	1	11318519	11318534	4	TGAAACACATCACACA	11318670	11318698	1	GCATAACCCACTTGTTCATAAGGATATTC	11318535	11318669	ACGGTGGTGTTGGTGGTGGTGGTGGTGGTGGCGTTGTTGGAAGGCATGTGACCGGTGGTAGTAAGACCAACGGTTGGTGGTTGGTGGTAGTTGTAGTAGTTTCCGTTCATGAAAGGGATGTGTGCATGCTCTGCA	GCATAACCCACTTGTTCATAAGGATATTCCTTCAGCTTCCCGATATCCGACGGTAGTGTNNNNNNNNTGAAACACATCACACA	11318537	11318565	+	10	7556_0252_SNP_a
1:11322612-11322791/19,22/+	0.982784	1	11322612	11322630	1	ACTAATTGAAAAGGAAAAG	11322770	11322791	1	GGTTGGTGGCTGGTGGTAGTTG	11322631	11322769	CATAATTAAATACTGGTCTTTTAAAACAAACAAAACACAAAATGCACACTACTGAAACACATCACACATTGTTGTTGTTGTTGTTGTTGGTGGTGGTGGTGGTGGTGGAAGGCATGTGACCGGTGGAAGTAAGACCAAC	GGTTGGTGGCTGGTGGTAGTTGCTTCAGCTTCCCGATATCCGACGGTAGTGTNNNNNNNNACTAATTGAAAAGGAAAAG	11322718	11322738	+	0	7564_0253
1:11403395-11403574/16,26/+	0.933293	1	11403395	11403410	10	TGGAGGTGGAGGTGGT	11403549	11403574	1	GCTAATGGCGGAGGGATGCTTCTAGA	11403411	11403548	TGCGCCTGACGCTTATTTCCTGTGCTCCCAAACGACGGAGGCGGTGGTGGCGGTGGCGGTGGTGCTGAGGGCGAAGGAATGCTTCTTGAAGAAGGAGGCGGAGGAGGAGGAGGAGGAGGACGTGGTGGTGGTGGTTGA	GCTAATGGCGGAGGGATGCTTCTAGACTTCAGCTTCCCGATATCCGACGGTAGTGTNNNNNNNNTGGAGGTGGAGGTGGT	11403503	11403530	+	0	7618_0254
1:11437263-11437442/16,28/+	0.980324	1	11437263	11437278	2	TCAAAGATGGCAGGAA	11437415	11437442	1	GCAAAAGCAGGTTGATCCTGAAGAGGAC	11437279	11437414	ACCAATCTTTAAAAGATTACTTGAAGAAGTATGAAAGTAGTGATGTTGTAGAGAAGAAGAAGAAGAAGAAGAAGCAGAAGAAGCCATCTAAACCTGAACCAAGAGGTGTTTTAGTTGTCGACGAAGATCCAGTTTG	GCAAAAGCAGGTTGATCCTGAAGAGGACCTTCAGCTTCCCGATATCCGACGGTAGTGTNNNNNNNNTCAAAGATGGCAGGAA	11437330	11437361	+	0	7653_0255
1:11672999-11673178/16,29/-	0.970265	1	11673163	11673178	1	CATCGATTAACGACAA	11672999	11673027	1	CGTCGTTGAGATTGAAAGATCATGTTCGG	11673028	11673162	ATTTTGTGAAACCCAAGAAAAAAAGTTTTAAAAATTGAAAACGATAACTGAAAAATGAATATGAACAAAAACACAGATGATGATGATGATGATGATGAAGAATGTATACAAATGTAGTATTAGTCACTGAGAAAT	CGTCGTTGAGATTGAAAGATCATGTTCGGCTTCAGCTTCCCGATATCCGACGGTAGTGTNNNNNNNNCATCGATTAACGACAA	11673065	11673087	-	0	7959_0256
1:11675246-11675425/16,29/-	0.910453	1	11675410	11675425	1	CGGTGATCGATCTTCT	11675246	11675274	1	AGATACAAGGATTACACATATACAAACTC	11675275	11675409	AGTTATGATTAAAAAAAATTGTGGCTTTATAATCAAATTATGAAATTTTTAAAAAATCAAATATGGAAAAGATACAAAAGAAAGATGATAATATAACATAAGTCATAATCTACAACAACAAACAACAACAACAAC	AGATACAAGGATTACACATATACAAACTCCTTCAGCTTCCCGATATCCGACGGTAGTGTNNNNNNNNCGGTGATCGATCTTCT	11675274	11675298	-	10	7966_0258
1:11735142-11735321/16,29/+	0.87689	1	11735142	11735157	1	AACGAAGAACTCAAGA	11735293	11735321	1	ACTTGTGGAAACGAGAGAGAGAGTGTTTC	11735158	11735292	AATTATAATTCACTGCTTACTTACTCTGATTAGCATTTAATATATATATATATATATATATATAAATATTTAATTAATGTTATAAATCATAGGTGATTTGATTTGCTGCAAAGAAAAACAAATTAATAAAAAATG	ACTTGTGGAAACGAGAGAGAGAGTGTTTCCTTCAGCTTCCCGATATCCGACGGTAGTGTNNNNNNNNAACGAAGAACTCAAGA	11735197	11735226	+	0	8044_0021
1:11762541-11762720/16,29/+	0.970312	1	11762541	11762556	2	TGATCGGTGGTGGTGG	11762692	11762720	1	CCATTACTTGACTGAACTTATTTGGGCCC	11762557	11762691	CTGAATTTTCTCGGCTAAGAGAAGATGAGAGTTTCGGCGAAAAGGTTATGCGAGAGAGAGAGAGAGAGAGAGAAACTTTGTTTCGGTTTCTTCCATTTCTGGCGGCGCCAGAGAATATATTTATGGGCTTTGAGC	CCATTACTTGACTGAACTTATTTGGGCCCCTTCAGCTTCCCGATATCCGACGGTAGTGTNNNNNNNNTGATCGGTGGTGGTGG	11762608	11762629	+	0	8067_0259
1:11784651-11784830/18,26/+	0.966792	1	11784651	11784668	1	GAAGAGACATCAAACAAA	11784805	11784830	1	GAGAACAAAGATTACGGAGGTGAGTT	11784669	11784804	CTTGAAGGTATGTCTTGTTGTTGTTGTTGTTGTTGTTGTAATGTTGGCGATGTAATGGATGGTTGTTGATTATTGTGTGTGTGTTTCAGGACTTCCTGGTGTTCTCTTCATTTTACCAGACTCTTATGTTGATCAA	GAGAACAAAGATTACGGAGGTGAGTTCTTCAGCTTCCCGATATCCGACGGTAGTGTNNNNNNNNGAAGAGACATCAAACAAA	11784683	11784707	+	0	8109_0260
1:11798011-11798190/16,26/+	0.982146	1	11798011	11798026	1	CGAATGAAGAACAGAG	11798165	11798190	1	GTGGTTATGTTGAGAACTTTGTGCGG	11798027	11798164	AAAGACAACGTAGGTATCGAGCCAGGAAACGGATGCGGGAAGAAGAAGCGGGTAACGATGATAATCTTTCGTTTGAGACAATGGGAAAACAAGAAGAAGAAGAAGAAGAAGACGAGGGACTAGAGTTTAATGGACCTA	GTGGTTATGTTGAGAACTTTGTGCGGCTTCAGCTTCCCGATATCCGACGGTAGTGTNNNNNNNNCGAATGAAGAACAGAG	11798117	11798138	+	0	8114_0261
1:11801941-11802120/16,29/+	0.71894	1	11801941	11801956	1	CCACCAATATGGTCCC	11802092	11802120	1	CTTATGTTATTGTGTTCTTGTAGATTTAC	11801957	11802091	ATTACTCCTAACCCTTACCTAAAAACCAAAAATAAAACAAAAAGAATTAAGATAAAATAGTATATATATATATATATATATATACTTCTAAAATTCTATCTTGCGAAGACAAATTCTTACTAACAAAACACTAAA	CTTATGTTATTGTGTTCTTGTAGATTTACCTTCAGCTTCCCGATATCCGACGGTAGTGTNNNNNNNNCCACCAATATGGTCCC	11802013	11802040	+	10	8116_0022_SNP_a
1:11877270-11877449/16,29/+	0.972448	1	11877270	11877285	3	AGGAAGAAAAGGAGAG	11877421	11877449	1	GGATTCGTTGAGAAACCAAACTAGTAATG	11877286	11877420	GAATCAGCATAAGGTGCTCTCTGGAGGAAGAAGAAGAAGAAGAAGAGAGAGAGAGAGAAATAAAGAGACGATTAAAGAGTGATTAATCAGAGGATCGGTGATAATTAATGGTATTTGATCAGAGTGATTAAGTAA	GGATTCGTTGAGAAACCAAACTAGTAATGCTTCAGCTTCCCGATATCCGACGGTAGTGTNNNNNNNNAGGAAGAAAAGGAGAG	11877312	11877344	+	0	8208_0262
1:11885620-11885799/19,26/+	0.980462	1	11885620	11885638	1	AACGGAGAAGGCTTTCTAT	11885774	11885799	1	GGGCCACACTGCTACTGGTACTGGAC	11885639	11885773	TCAAAGAAAAGGCATTAAAGTGTTGAGAAAGAAGAGAAACGAAGAAGAAGTTAGCGAAGAAGACGAGGAAGATGCGTTCTCGGACACAAGCGAGGAGAGCATCTTCTGCGATGAAGAAGAAGAAGAAGAAGAAGA	GGGCCACACTGCTACTGGTACTGGACCTTCAGCTTCCCGATATCCGACGGTAGTGTNNNNNNNNAACGGAGAAGGCTTTCTAT	11885751	11885773	+	0	8217_0263
1:11996529-11996708/22,23/-	0.74937	1	11996687	11996708	1	GTACTCTCTTTTTTCATTGTAC	11996529	11996551	1	CCAAACGAATTATTCCTCTGATG	11996552	11996686	CACAACAACAACAACAACAACAAAAAGCCTAATAAATTACCATCAAAATTTATTTCATATTGAAAATCTGAGTTAGAAAGAACTATTGCCCAAAATAACATCATAATTATATAATATCTTTGTTCATATCATAAT	CCAAACGAATTATTCCTCTGATGCTTCAGCTTCCCGATATCCGACGGTAGTGTNNNNNNNNGTACTCTCTTTTTTCATTGTAC	11996664	11996685	-	0	8366_0264
1:12030131-12030310/16,29/+	0.934166	1	12030131	12030146	1	CTCACTAACGTGAATC	12030282	12030310	1	GCATAACCAATGGAATGAGGTGGAAGAGT	12030147	12030281	CTAATGTTGTTGTTGTTGTTGTTGTTGATGAAAGGTGTGATGTTACATTAATACTACTTGAGATGGATAGAATTTTGAGACCAGAAGGAACCGTGGTGTTTAGAGACACTGTGGAAATGTTGACGAAGATACAAA	GCATAACCAATGGAATGAGGTGGAAGAGTCTTCAGCTTCCCGATATCCGACGGTAGTGTNNNNNNNNCTCACTAACGTGAATC	12030151	12030173	+	0	8420_0265
1:12081625-12081804/19,26/-	0.920622	1	12081786	12081804	1	CCTCATGGTTATTAACAAG	12081625	12081650	1	TGAGATTTTCTTACAGTGATTCCCAG	12081651	12081785	AGTTTGGAGCCCCGCAATATCATCAGAGTCAATAAAAGTTACCTGGAGACATTAACACACACACACACACACACATATATATAACAAAGTGTTAATCGATGGAGCTGGAAAGGAAACAAAATGAAAGTTATGAAT	TGAGATTTTCTTACAGTGATTCCCAGCTTCAGCTTCCCGATATCCGACGGTAGTGTNNNNNNNNCCTCATGGTTATTAACAAG	12081711	12081731	-	0	8469_0266
1:12091679-12091858/16,27/+	0.983062	1	12091679	12091694	1	TGTCCCCATGTGCTCT	12091832	12091858	1	TGTGTGTGCTTCGTCTTTTTTCTCTCC	12091695	12091831	TCTTCCACCAAACGTGAAGAGAGAGAAGAGAGAGAGAGAGAGAGAGAGAGAGAGAGAGAGAGAGAGAGAGAGAGAGAGAGAGAGAGAGAGAGAGAGAGAGAGAGAGAGAGAGAGAGAGAGAGAGAGATGGATAAAAG	TGTGTGTGCTTCGTCTTTTTTCTCTCCCTTCAGCTTCCCGATATCCGACGGTAGTGTNNNNNNNNTGTCCCCATGTGCTCT	12091712	12091821	+	0	8475_0267
1:12128598-12128777/18,27/+	0.969452	1	12128598	12128615	1	AACCTGCACGTCAAGAAA	12128751	12128777	1	GTTTGGGTTTGATGGGCAAATCTGTTT	12128616	12128750	AAAAAAAGTTAGTTAGTTAGTTAGTTAGTCAATTTGGCGGTTATTGTAAAAAAGATCAAAGTCAAATCACCTGAATTTATTAGAATGGAGGAGAGGTTTGACACGAACAAGATCCGTTGAAGGTTGGTGAACCAT	GTTTGGGTTTGATGGGCAAATCTGTTTCTTCAGCTTCCCGATATCCGACGGTAGTGTNNNNNNNNAACCTGCACGTCAAGAAA	12128622	12128644	+	10	8489_0268_SNP_a
1:12355662-12355841/17,28/+	0.959601	1	12355662	12355678	2	TCTGTCTCTATCCTCTG	12355814	12355841	1	GCTGATCCCATCTAGGGGCCAAGCCTCT	12355679	12355813	TTTTATTTTTTTCTTCCGGTGGTACAAAAATTCACAATGAACTGTATTTATCACAATTAATGACCGATTGCTTCTTCACCTACTCTCTCTCTCTCTCTCTCTCTCTTTGGAAGTAACCAAACAAGCCTATATGCT	GCTGATCCCATCTAGGGGCCAAGCCTCTCTTCAGCTTCCCGATATCCGACGGTAGTGTNNNNNNNNTCTGTCTCTATCCTCTG	12355761	12355784	+	0	8745_0269
1:12361106-12361285/16,29/-	0.881102	1	12361270	12361285	2	AAAAACTGTAAAAACA	12361106	12361134	1	TCTGCCGCCGGCATTCTCTCCGGTACGTC	12361135	12361269	TTATTATAACCTGAAAATGGAACTCAAAGACAAATAAAGTTAACTAATGAGCTTTGCTTTTTCCATCACAAAGCTAACCAACCCAACAAAAGCCCACCAATCTCTCTCTCTCTCTCTCTCGCCGTTACTCTCTGC	TCTGCCGCCGGCATTCTCTCCGGTACGTCCTTCAGCTTCCCGATATCCGACGGTAGTGTNNNNNNNNAAAAACTGTAAAAACA	12361150	12361169	-	10	8749_0270_SNP_a
1:12412251-12412430/17,28/-	0.980003	1	12412414	12412430	3	ACAACAAATCTATGGTG	12412251	12412278	1	GAAAACGGATGTGGATTTGGAGCTGTGG	12412279	12412413	AGAAGAAGAGGAAGAAGAAGAAGAACTAAGAGGTGGTGACAAGAGAGAGTACCATCAACTTTCACAAACATATTCACAAGAAGAAGGCTCCAACAACGATGAAGAAGATAGGAAATCTTCTCTAGAGGCAATGGA	GAAAACGGATGTGGATTTGGAGCTGTGGCTTCAGCTTCCCGATATCCGACGGTAGTGTNNNNNNNNACAACAAATCTATGGTG	12412389	12412413	-	0	8820_0271
1:12485475-12485654/21,20/+	0.980181	1	12485475	12485495	1	CTTCCTCTTTTGCTTCCGTGG	12485635	12485654	1	CGACTTGACTTCGAGTCTTC	12485496	12485634	TGAGTCATTCTCTCAACGATCTTCTTCTTCTTCTTCTTCTTCTTCTTCTTCTTCTTGTTGCTTTCTCCGGTGATTTTTTTCTTCTCCGGTGATAATCGATTTTCGTTGAACTGAAATTTTGAAAATCGATTTTACTATT	CGACTTGACTTCGAGTCTTCCTTCAGCTTCCCGATATCCGACGGTAGTGTNNNNNNNNCTTCCTCTTTTGCTTCCGTGG	12485515	12485551	+	0	8893_0272
1:12503381-12503560/20,25/+	0.892454	1	12503381	12503400	1	GAGAAAAAGAGTCTTCATTG	12503536	12503560	1	CGGCTCCGTTATTTACGCCTCCGGT	12503401	12503535	ATAACAGAAGAGAGAGAGAAGAAGAAGAAGAAGCTTCACAATCGTAACAATGGCGGTGAAGACGCCATTTCTCAAACTTCTCCCTCTTCTTCTCCTTCTCCTCCACTTCCCTTTCTCATTCTCTACCATACCTCT	CGGCTCCGTTATTTACGCCTCCGGTCTTCAGCTTCCCGATATCCGACGGTAGTGTNNNNNNNNGAGAAAAAGAGTCTTCATTG	12503406	12503433	+	10	8921_0273
1:12589658-12589837/26,19/-	0.910419	1	12589812	12589837	1	TGGATGTTGAGACTTTCTATGATGGT	12589658	12589676	1	AAGGCTCCTCCGGCTTCTC	12589677	12589811	TATCTAGCTGCAATCATGGTTGAAGAAGGTGGTGTTGCTCCTGTTGGTTCTGCTATTGCTTTGTTAGCTGAAACTGAAGATGAGATTGCTGATGCTAAAGCTAAAGCTTCTGGTGGTGGTGGTGGTGGTGATTCT	AAGGCTCCTCCGGCTTCTCCTTCAGCTTCCCGATATCCGACGGTAGTGTNNNNNNNNTGGATGTTGAGACTTTCTATGATGGT	12589682	12589701	-	10	9041_0274_SNP_a
1:12590019-12590198/21,24/+	0.980291	1	12590019	12590039	1	GGAAGATCGTGTTTTTGTGGG	12590175	12590198	1	CGAAGAGCAGGCGGAGTTTGCCAA	12590040	12590174	GAGGGAAACTGAAGGTAAGAAGGGTGTTTGGAGAAGACGAGACATTTTTCGAATTTCGTTAATCGCAATGCGAGAGAGAGAGAGAGATAGAGAGAAATGAGATATAAGAAGAGTGAAGAAGCTCCTCGGAATTAT	CGAAGAGCAGGCGGAGTTTGCCAACTTCAGCTTCCCGATATCCGACGGTAGTGTNNNNNNNNGGAAGATCGTGTTTTTGTGGG	12590111	12590134	+	0	9042_0275
1:12593257-12593436/16,28/-	0.939697	1	12593421	12593436	8	TCTTCCACGATCCTTA	12593257	12593284	7	CGATTATCTCAGGAATTTGGTAAAAGTT	12593285	12593420	TCGAAAATAAATAAAATATCTGTCTCTTTTTTTTTTCTCTCTCTCTCTCTCTCTCTCTCTCTCTCTATGATTTGTAGCGCCTCTCTCTCTCCACGTCTCCATAACTTTTGGAGAAGTTTCTTAAACAATTCGATCT	CGATTATCTCAGGAATTTGGTAAAAGTTCTTCAGCTTCCCGATATCCGACGGTAGTGTNNNNNNNNTCTTCCACGATCCTTA	12593355	12593385	-	0	9046_0276
1:12733320-12733499/17,28/-	0.912369	1	12733483	12733499	11	ACCAAATTCCTGAGATA	12733320	12733347	1	ATTTTATTTATGGGAATGTTACACGTTT	12733348	12733482	AACGAGATCGAATTGTTTAAGAAACTTCTCCAAAAGTTATGGAGACGTGGAAAGAGAGAGGCGCTACAAATCATTAGAGAGAGAGAGAGAGAGAGAGAGAGAGAGAGAGAGAGAGAGAGAGAGAGAGAGAGAGAG	ATTTTATTTATGGGAATGTTACACGTTTCTTCAGCTTCCCGATATCCGACGGTAGTGTNNNNNNNNACCAAATTCCTGAGATA	12733347	12733407	-	10	9230_0277_SNP_a
1:12764449-12764628/16,29/-	0.810299	1	12764613	12764628	1	CCTGGTTGTTTAGCTT	12764449	12764477	1	GTGCATGGAAAAGCAATGCGCATGAGATA	12764478	12764612	TTATCAAATAAATTCAGAATTATATATATATATATATATATATATATATATATATGTATATATATAGATATGAATAAACTCATAACATTAGATCCGGAGATATAACTCTATAAGATGAATTTATTATATATGTTT	GTGCATGGAAAAGCAATGCGCATGAGATACTTCAGCTTCCCGATATCCGACGGTAGTGTNNNNNNNNCCTGGTTGTTTAGCTT	12764542	12764592	-	0	9267_0278
1:13102807-13102986/16,29/+	0.893792	1	13102807	13102822	2	AGTTTCTTTGTGTTCA	13102958	13102986	1	ACATCACTTATTATTACCGTAACAATTAT	13102823	13102957	GCATCAAACGAGAGAGAGAGAGAGAGAGAGAGAGAGAGAGAGAGAGAGAGAGAGAGAGAGAGAGAGAGAGAGAGAGAGAGAGAGAGAGAGAGAGAGAGAGAGAGAGAGAGAGAGAGAGAGAGATCTAAACACTTA	ACATCACTTATTATTACCGTAACAATTATCTTCAGCTTCCCGATATCCGACGGTAGTGTNNNNNNNNAGTTTCTTTGTGTTCA	13102832	13102945	+	0	9709_0279
1:13192861-13193040/18,26/-	0.980333	1	13193023	13193040	1	AAAAAAGCTTCAAGCAAA	13192861	13192886	1	GGAGCCGCAGAGAAAACCGACTGGTT	13192887	13193022	TTGCAAGATATGAAGAAGAGGAAGAAGAAGAAGAAGAAGAAGAAGAAGAAGTAGGAGAAGTAACTAACGTTTCCTGAGAAGGGAGGAGAGCCGAAGTAAAAGAAGCTGGAAACGAGTTATCGGCGAGAACAGGAAT	GGAGCCGCAGAGAAAACCGACTGGTTCTTCAGCTTCCCGATATCCGACGGTAGTGTNNNNNNNNAAAAAAGCTTCAAGCAAA	13192963	13193011	-	0	9836_0025
1:13229810-13229989/16,29/+	0.982044	1	13229810	13229825	2	AACATGAAAACAGAGT	13229961	13229989	1	GAGTGTACGTACGGAGGCTGTGTGTAGTG	13229826	13229960	AAAGGTTACAAACGAAGAAGGAGAGAGAAGAGAGAGTAAAGCCAAGGAAACAATACGGAGAGAGGAGGAGAGGTTTGGTGATATAACAAGAAATGGTTTGTGAGAGAGAGAGAGAGAGAGAGAATGTTGTTGCGT	GAGTGTACGTACGGAGGCTGTGTGTAGTGCTTCAGCTTCCCGATATCCGACGGTAGTGTNNNNNNNNAACATGAAAACAGAGT	13229927	13229948	+	0	9885_0280
1:13324679-13324858/16,29/-	0.754544	1	13324843	13324858	1	CAGAGACTAAGAAGTG	13324679	13324707	1	CAAATAGAACACACATTATAAGGAACGAA	13324708	13324842	ATTAAGGTAAAACTAATTACATAAACACTCTTAACTAAGTGTTAACATATATATATATATATATATGTATATATATACTTTTATATTCTCCACCATCTTTATCTCTATGCTTGGTTTAATAAGCTGTGTTTAATA	CAAATAGAACACACATTATAAGGAACGAACTTCAGCTTCCCGATATCCGACGGTAGTGTNNNNNNNNCAGAGACTAAGAAGTG	13324766	13324796	-	10	10007_0026_SNP_a
1:13450152-13450331/16,29/+	0.983865	1	13450152	13450167	9	AACGACGTCGTTTACT	13450303	13450331	1	CACTCTCTCCAAGATCTATTCACGCATCG	13450168	13450302	CATGAAGCGAAAGACGGCAAACACGAACGGGTTTACGTAGACCGTCAAACGCTCCTCCGTCCGACGGAGAAAAAACGAGACGGTGAAGAAGAAGAAGAAGAAGAAGAAGAAGAACGACTCAAAGATCTCATCGAT	CACTCTCTCCAAGATCTATTCACGCATCGCTTCAGCTTCCCGATATCCGACGGTAGTGTNNNNNNNNAACGACGTCGTTTACT	13450252	13450281	+	0	10138_0281
1:13483683-13483862/23,22/-	0.977023	1	13483840	13483862	10	TTCCACTGTTTGTACCAACTGAC	13483683	13483704	1	GCTGCATATTCTACGGCAGGTT	13483705	13483839	ACCTCGTTCCTATCTTACACACCTTCGTGTAGGTAGTTGGATCAAAGTACATAACTTCTGGCGGCAATGGTTGATTATCATCATCATCATCATCATCATCCTGCATATTCTGCGGCTGAAGATCATCATCACCAT	GCTGCATATTCTACGGCAGGTTCTTCAGCTTCCCGATATCCGACGGTAGTGTNNNNNNNNTTCCACTGTTTGTACCAACTGAC	13483740	13483763	-	0	10200_0283
1:13578787-13578966/18,27/+	0.868053	1	13578787	13578804	1	GACCAAGTAATAGTTGAG	13578940	13578966	4	CCAGAAAACTTTTGGCCTTGCTCTACG	13578805	13578939	TAAAATACAGTATGTATATATATATATATATATTTATTACCTGCAATTGCCTCATGAATATTTGCCGGTAGCAACTCTACTAATCCAAATGGCAGTAATCATTGCATGAATACATGGCAATCATGACTTTTCATA	CCAGAAAACTTTTGGCCTTGCTCTACGCTTCAGCTTCCCGATATCCGACGGTAGTGTNNNNNNNNGACCAAGTAATAGTTGAG	13578815	13578841	+	0	10360_0284
1:13851021-13851200/18,27/+	0.903191	1	13851021	13851038	1	GATCCTTACACAAGAAAT	13851174	13851200	1	CGGTTCACCAAAAATCGGTGGTACCGA	13851039	13851173	CTCTCTCTCTCTCTCTCTCTCTCTCTCTCTCTCTCTCTCTCTCTCTCTCTCTCTCTCTCTCCATGATTTGTAATGCCTTTCTCTCTCCACATCTCCATAACTTCTAGGCTTGATTTCTCTTATCGATTATGGCGG	CGGTTCACCAAAAATCGGTGGTACCGACTTCAGCTTCCCGATATCCGACGGTAGTGTNNNNNNNNGATCCTTACACAAGAAAT	13851038	13851099	+	10	10688_0285_SNP_a
1:13961643-13961822/18,27/-	0.942279	1	13961805	13961822	4	CATATAGAATTGACGTTG	13961643	13961669	1	AAACAGAGTGTTCGTATAGTTGCAGTG	13961670	13961804	TGTCCAAATAAAGAATCTATTAAGTTACTCAAAAAATTGGAGGACCGAAAAAAAGAGCTTCTAAAATCTAGTGCATGGATTGTTCAAACTTCAGATGAAGAAGAAGAAGAAGAAGAAGAAGAAGAAGAAGAAGAA	AAACAGAGTGTTCGTATAGTTGCAGTGCTTCAGCTTCCCGATATCCGACGGTAGTGTNNNNNNNNCATATAGAATTGACGTTG	13961670	13961712	-	10	10873_0286
1:14027671-14027850/16,29/+	0.981554	1	14027671	14027686	14	CAAACAAAACAAAGAA	14027822	14027850	1	ACCCAGCCGAGTGATCTAAGGAACTGTGC	14027687	14027821	CATAACCATTATTAATATTTCTGAGTTATAATATGAGAGAGAGAGAGAGAGAGACTGGGGCTGTTATGTCTATTTACCTGTTCCAAAAAGGAATCTATCTCCTCCTCTGTGAGATATTCTTCACCATTGTTTTCA	ACCCAGCCGAGTGATCTAAGGAACTGTGCCTTCAGCTTCCCGATATCCGACGGTAGTGTNNNNNNNNCAAACAAAACAAAGAA	14027721	14027740	+	0	10969_0287
1:14078263-14078442/16,28/-	0.979154	1	14078427	14078442	1	TAAGTCTGGGGGATAG	14078263	14078290	1	GAGACCATGCGATGAAAGCCTGATGGAT	14078291	14078426	AAAAAGTAACAAAAGAAAAAGAAAAAAAAAGTTATATATATATATATATATATATATATATACAAAGGATGGTCGATTTATCATGGTATATTACATGAATAAGTCTAGAAGGTTCTTGAATATTAGCTTGCTTGAT	GAGACCATGCGATGAAAGCCTGATGGATCTTCAGCTTCCCGATATCCGACGGTAGTGTNNNNNNNNTAAGTCTGGGGGATAG	14078365	14078394	-	0	11052_0027
1:14266537-14266736/19,26/+	0.943523	1	14266537	14266555	2	ATAAGAAAATAGAACACAA	14266711	14266736	17	TACAATGGTTGAGGTGGTGTTACCTC	14266556	14266710	TGTTAAACATGTTTTAAACCCCCCCCCCCCACCACACACACACACACACACACACAACTTAAATTACACAGTCCCTTGTGTAATAAAAGTCTGAGAAAGAAATCAAGACCAAAACACAAAACAAACAAAAAATAATAAAAAGATGCTATGGTATA	TACAATGGTTGAGGTGGTGTTACCTCCTTCAGCTTCCCGATATCCGACGGTAGTGTNNNNNNNNATAAGAAAATAGAACACAA	14266585	14266611	+	10	11277_0020
1:14595980-14596159/18,26/-	0.871276	1	14596142	14596159	6	GACATGGAGAATGGAAAG	14595980	14596005	6	GGGATTGGAGCATTTTTCCGGGACTT	14596006	14596141	TTTTTCAGGCATGAAGAGTCCAACTTGCATTATCAAGTACAATATATGTTTTTTAATTTGCCACACTTTTTTAAACCTCTGATTTAACTTTAACATATATATATATATATATATATATATATATATATATATTTTA	GGGATTGGAGCATTTTTCCGGGACTTCTTCAGCTTCCCGATATCCGACGGTAGTGTNNNNNNNNGACATGGAGAATGGAAAG	14596010	14596047	-	0	11616_0029
1:15645767-15645946/17,27/+	0.861161	1	15645767	15645783	3	AAGTTAATAGAATTACA	15645920	15645946	1	GAGAGAGAGAGTCACAATTCGATTGTG	15645784	15645919	GAAACATTTTCTGGGCAAATCAAAGAAGTTGGAATCTTTAATAGACTAAACATTGATGTCATTGGTGATGTAAACGGATTTAGAGAGAGAGAGAGAGAGAGAGAGAGAGAGAGAGAGAGAGAGAGAGAGAGAGAGA	GAGAGAGAGAGTCACAATTCGATTGTGCTTCAGCTTCCCGATATCCGACGGTAGTGTNNNNNNNNAAGTTAATAGAATTACA	15645865	15645930	+	0	13257_0290
1:15893673-15893852/17,26/-	0.981809	1	15893836	15893852	1	GGTTATCGGGTTAGGCG	15893673	15893698	1	CCCACTGAAAAATTTCTCTTCCCACT	15893699	15893835	AGATTACAAACATAGTCAAACAAAGGAATTTAAAGAAGAAGAAGAAGAAGAAGAAGAAGAAGAAGAAGAAGAAGAAGAAGGAACTGACGGTCGCTGTTAGGTGATACATGCCATGTCTCCCCCTGACGTGAACCAAT	CCCACTGAAAAATTTCTCTTCCCACTCTTCAGCTTCCCGATATCCGACGGTAGTGTNNNNNNNNGGTTATCGGGTTAGGCG	15893756	15893803	-	0	13585_0294
1:15965365-15965544/21,24/+	0.761792	1	15965365	15965385	1	CTCTCATTCAATTTTCCACCG	15965521	15965544	1	GATCATTAGAGCTGTGTGTTTTAC	15965386	15965520	TCAAAGACAAAATACTTTCTTATTTTCTAGTCATTCTATCTTTCTTTTCTTAACCATCGCGCAATTATTATTTTTATTATTATTATTCAAAAATCTTCCACGAATACTACATAATCAATATATAAATGCATTGAT	GATCATTAGAGCTGTGTGTTTTACCTTCAGCTTCCCGATATCCGACGGTAGTGTNNNNNNNNCTCTCATTCAATTTTCCACCG	15965449	15965472	+	10	13692_0295_SNP_a
1:15973677-15973856/20,25/+	0.969499	1	15973677	15973696	1	CAGCGGAACAAAGTTTTCTG	15973832	15973856	1	GCAGCATTGAGGTTTATGGAGAAAG	15973697	15973831	TTTCGATGCAAAACTCTAACTGCAGCGGTTTTATGGGCATGGTTGAAGGTTTAACCCTGTGAGATCTCTTTAGTTAGTGTTTAGGATGTCATCAATATTGACTCATTTGTTTGTTTGTTTGTTTGTTTGTTTGTT	GCAGCATTGAGGTTTATGGAGAAAGCTTCAGCTTCCCGATATCCGACGGTAGTGTNNNNNNNNCAGCGGAACAAAGTTTTCTG	15973802	15973831	+	0	13704_0296
1:15977043-15977222/18,23/-	0.98206	1	15977205	15977222	1	TGAGGTTTCTGGTAAAGG	15977043	15977065	1	GCTGAGGGTTTATTTGGGGTTTG	15977066	15977204	TTTTCACTTAGAGCTTCAAGTTCCGCGAGAAGCTGTGTGTTAGAACTCCGGCTACCGGAATATTCTCCTGCCATGTAGAAGAAGAAGAAGAAGAAGCTCTTCTGTGTTTTTTTTGGTCCCCAGAAGAAGGGATAAGGAA	GCTGAGGGTTTATTTGGGGTTTGCTTCAGCTTCCCGATATCCGACGGTAGTGTNNNNNNNNTGAGGTTTCTGGTAAAGG	15977109	15977128	-	10	13705_0297_SNP_a
1:15993733-15993912/17,28/+	0.980136	1	15993733	15993749	1	GACAGATGAAATGTTAG	15993885	15993912	1	TTGACACTCGTCGGAGTATAGTCGTCTC	15993750	15993884	AGAGATTTTGCCGGCAAAAAGTTTGAGAGAGAGAGAGAGAGAGAGAGAGAGAGAGAGAGAGAGAGAGAGAGAGAGAGAGAGAGAGATGAACATCACAATGGATAAGAACAAGAAACTCTAACTAATTTTGATGGA	TTGACACTCGTCGGAGTATAGTCGTCTCCTTCAGCTTCCCGATATCCGACGGTAGTGTNNNNNNNNGACAGATGAAATGTTAG	15993774	15993835	+	10	13738_0031
1:16263003-16263182/16,29/-	0.835663	1	16263167	16263182	1	CAATCCACAAGTGTTG	16263003	16263031	1	CAACTTTGTTGTACTAGTTTTGTTATGCC	16263032	16263166	AAAGATTAGTTAATATATATATATATATATATATATATATATATATATATATATATATAATCCACTTGTCTAAGTCTAGTAATCTTCCTTGGAAGAAAAGACAACAACAAAACTATATAAAAGGAGTGGTTCACA	CAACTTTGTTGTACTAGTTTTGTTATGCCCTTCAGCTTCCCGATATCCGACGGTAGTGTNNNNNNNNCAATCCACAAGTGTTG	16263108	16263154	-	10	14102_0300
1:16415332-16415511/21,24/-	0.973199	1	16415491	16415511	2	CTTGAATCAGTTTCTTCGAGT	16415332	16415355	1	GCAGCGTGGTTTTGTAATCTCTTG	16415356	16415490	AGATACTTCTCGCGTTTAGATAGGTCTGAAACCAGAACAGAGTGGAGTAGCGTGTGGTCCAAGTCAAGGACTAAATGAAGCTTCTTCTTCTTCTTCTTCTGAAAGAGTTGCGTAGTAAGATGCTTTTTTAACATC	GCAGCGTGGTTTTGTAATCTCTTGCTTCAGCTTCCCGATATCCGACGGTAGTGTNNNNNNNNCTTGAATCAGTTTCTTCGAGT	16415391	16415410	-	0	14368_0301
1:16620697-16620876/23,21/-	0.97435	1	16620854	16620876	1	ACCATTGCTTGGATTACCCTGCA	16620697	16620717	1	GCTGGCTTGCTGAGGAGAAGG	16620718	16620853	TTAGTGCAACTTGCCTACTACTTTGATCACTGTTTGTATTCTGGGAAACTGTTTGCTGCTGCTGCTGTTGTTGTTGTTGTTGTTGTTGCTGTTGCTGCTGCTGCTGTTGTTGTTGCTGCTGCTGCCTAAGCTGGTC	GCTGGCTTGCTGAGGAGAAGGCTTCAGCTTCCCGATATCCGACGGTAGTGTNNNNNNNNACCATTGCTTGGATTACCCTGCA	16620729	16620800	-	0	14721_0302
1:16673524-16673723/24,21/+	0.905611	1	16673524	16673547	1	CCTGAAAAGTTGTTAAATGGTTTC	16673703	16673723	1	CTAACAAGCTCTATATGGCCT	16673548	16673702	ATATACGAAAGAGAAGGAGAGAGAGAGAGAGAGAGAGAGAGAGAGAGAGAGAGAGAGAGAGAGAGAGAGAGAGAGAGAGAGAGAGAGAGAGAGAGAGAGAGAGAGAGAGAGAGAGAGAGAGAGAGAGAGAGAGAGAGAGAGAGAGAGAGAGAGAA	CTAACAAGCTCTATATGGCCTCTTCAGCTTCCCGATATCCGACGGTAGTGTNNNNNNNNCCTGAAAAGTTGTTAAATGGTTTC	16673557	16673701	+	10	14795_0027
1:16718052-16718231/19,21/-	0.980806	1	16718213	16718231	1	GGAGGTGGATTCAGAGTTG	16718052	16718072	1	GTTGCGGGGTGGGCCAGAAGA	16718073	16718212	ATGTTTGTCCACAGCTCTATGGATTCGGATTCAGATTCAGATTCAGATTTGGATTCGGAGGAGGAGGAGGAGGAGGAGTTGATATCACTCCTTTCTGAAATGTACTCACTCTATGCGTTTACTACAAATGAAGAGTTGGA	GTTGCGGGGTGGGCCAGAAGACTTCAGCTTCCCGATATCCGACGGTAGTGTNNNNNNNNGGAGGTGGATTCAGAGTTG	16718135	16718156	-	0	14840_0306
1:16868383-16868562/16,29/-	0.973517	1	16868547	16868562	2	TTGAATGTAAAATACA	16868383	16868411	1	TTGGTGTTCTTCGAGCTTGAAGGTGCGGT	16868412	16868546	AGAGGCAAAGCTCCACCTTAGAGAATCTTATACAAAATGAGAGAGAGAGAGAGAGAGAGAGAGAGAGAGAGAGAGAGAGAGAGAGAGAGAGAGAGAGAGAGAGAGAGAGAGAGAGAGAGAGAGAGAGAGAGAGAG	TTGGTGTTCTTCGAGCTTGAAGGTGCGGTCTTCAGCTTCCCGATATCCGACGGTAGTGTNNNNNNNNTTGAATGTAAAATACA	16868412	16868508	-	10	15071_0307_SNP_a
1:16991038-16991217/19,25/-	0.87506	1	16991199	16991217	2	AAAGAACAATATCAAAAGA	16991038	16991062	1	CAGGCAAAGAAAACTCAACACCATC	16991063	16991198	TCAAGCAAGAGAAAAAGATTGAAGAGATCAAATATTTGGAAAAAACCAAAGACATTTTGTGTTTATTAACATACCTAAGGTTAGAGCCGCTTCCTTGGTTAACTATGATGAACCATCTTCTTCTTCTTCTTCTTCT	CAGGCAAAGAAAACTCAACACCATCCTTCAGCTTCCCGATATCCGACGGTAGTGTNNNNNNNNAAAGAACAATATCAAAAGA	16991063	16991083	-	10	15249_0308_SNP_a
1:17118537-17118716/16,29/+	0.968748	1	17118537	17118552	3	ACATTCTTGAGAATGG	17118688	17118716	2	GCTGCAACAAAAGGACACACCAAGGATTG	17118553	17118687	TCTCTCTCTTTCTCTATATCTCTCGATCTCTCCATTGTTGTTGTTGTTGTTGTTGTTGTTGTTGTTGTTGTTGTTGTCTACTCAATTATCTTGCCAATGCAACTGAATAGGTAAAACAATGAACCAAGATTTGGA	GCTGCAACAAAAGGACACACCAAGGATTGCTTCAGCTTCCCGATATCCGACGGTAGTGTNNNNNNNNACATTCTTGAGAATGG	17118587	17118629	+	0	15383_0310
1:17436755-17436934/16,29/+	0.923371	1	17436755	17436770	5	AAACAAAACAGAGTAA	17436906	17436934	1	CGAACAGGATGGTTAGAGACATCTTGGAT	17436771	17436905	ATGATATTTTTATTAATTTTCTTCTACTTTTTTCCTTTAATAGTTGTTATTTGTTATTTCTATTCTTGTTATTTGGAGAAGAAGAAGAAGAAGAAGAAATGACTTACAGATTGAAGATGGTTTTGGATAAGAGAT	CGAACAGGATGGTTAGAGACATCTTGGATCTTCAGCTTCCCGATATCCGACGGTAGTGTNNNNNNNNAAACAAAACAGAGTAA	17436847	17436868	+	0	15746_0312
1:17646733-17646912/20,25/-	0.980903	1	17646893	17646912	1	ACCTGCTGCTATCCAACTAA	17646733	17646757	1	GCCGTTGAAATTGTGTGCCTTGTGG	17646758	17646892	ATGATTCTTCTTCTTCTTCTTCTTTTGTCTCCAACGGTTCGGTTTGTGTTGGTGTTGACTCTTTGATATGTCCACAAACATTCTCAAGAGAAGGACCATTAAGTCCGGGGTTTCCTTCGTAGGAAGAGCATTTTT	GCCGTTGAAATTGTGTGCCTTGTGGCTTCAGCTTCCCGATATCCGACGGTAGTGTNNNNNNNNACCTGCTGCTATCCAACTAA	17646869	17646888	-	0	15994_0313
1:17766914-17767093/20,25/-	0.942455	1	17767074	17767093	1	TGATCAGGTGGATTGGCCGT	17766914	17766938	1	GCCACTGAGTCTGCGCATTGTTTAG	17766939	17767073	TTCAAGAGGAGGAGGAGGAGGAGGAGGAAGAGGATGCGTTACGCCGTGACGGCCCTTGTGGTAATGATATCTTGCTCGTGCCACGTTGGTGAAATGTCCAAAGAGGACAGTGGAGATTATGTAAATCACGAGAAT	GCCACTGAGTCTGCGCATTGTTTAGCTTCAGCTTCCCGATATCCGACGGTAGTGTNNNNNNNNTGATCAGGTGGATTGGCCGT	17767040	17767068	-	0	16109_0314
1:17817240-17817419/16,29/+	0.960005	1	17817240	17817255	1	CCGGATAAAACAGAGA	17817391	17817419	1	CGCCACTATCTCTTTGCTTCCTCCTTCTC	17817256	17817390	ATCAAAATCAATAGATGGATCAAAAGAGAGTATAAGTTTATGGTAATGTGTTTATATATATATATATATATATACAAGAACGAGATTAGAGGAGAAGAAGAGAAAAAGTGGCGGCTGAATATGGAGAGGGGAACA	CGCCACTATCTCTTTGCTTCCTCCTTCTCCTTCAGCTTCCCGATATCCGACGGTAGTGTNNNNNNNNCCGGATAAAACAGAGA	17817308	17817329	+	0	16130_0315
1:17882849-17883028/16,29/+	0.725827	1	17882849	17882864	1	GGCGCCTTTGGTTCTA	17883000	17883028	1	CATCAGAATAATCATAATCGTTAGTTGAC	17882865	17882999	CAATATAATAATCACCATCATCATCATCATCATCATCATCATCATCATCATCATCATCATCATCATCATCATCATCATCATCATCATCATCATCATCATCATCATCATCATCATCATCATCATCATCATCATCAT	CATCAGAATAATCATAATCGTTAGTTGACCTTCAGCTTCCCGATATCCGACGGTAGTGTNNNNNNNNGGCGCCTTTGGTTCTA	17882875	17883004	+	0	16194_0317
1:17898500-17898679/16,28/+	0.981794	1	17898500	17898515	1	ATTAGGAAGACCAGGA	17898652	17898679	1	GAAGGAAGCGGACGAAGATGAGAAGCCC	17898516	17898651	AGATTCCATCGATGGATCGGAGTAGGAAGCTGAAGAAGAAGAAGAAGAAGATGATCAGTGAAAAGTAATGGAGAAGGAGAATTGAAACATAGAGAAAATTGAAAATTAACGTACGTGAGCGAGGGAGAAAGTGTGA	GAAGGAAGCGGACGAAGATGAGAAGCCCCTTCAGCTTCCCGATATCCGACGGTAGTGTNNNNNNNNATTAGGAAGACCAGGA	17898547	17898566	+	0	16201_0318
1:17960687-17960866/18,27/+	0.966042	1	17960687	17960704	1	AAGCCGATAAGTGAACTT	17960840	17960866	1	GCGGTGAAGCGAGGAGGCGATGAGAGA	17960705	17960839	CAATGTGTGAGACTAAAATTATGAATCTCACTACCATTACACTTATAATTTCATTTTCATGAAGGTACGAAATTACCAAGATTGAGAACTAACCGGCGGTGGGGGCAAATAGGGACGACGACGACGACGACGACG	GCGGTGAAGCGAGGAGGCGATGAGAGACTTCAGCTTCCCGATATCCGACGGTAGTGTNNNNNNNNAAGCCGATAAGTGAACTT	17960818	17960839	+	0	16238_0319
1:17965781-17965960/22,18/-	0.957119	1	17965939	17965960	1	GATTGGTGGATCTTCCTCTTTG	17965781	17965798	1	GTGATGGTGGGTTTGGGC	17965799	17965938	ATTCATGTCGATCAATTTCACAAATTTGAACTCCTCGAGACTCAATTCCCTCAGATTTCTCCGGGAAGTGATGGTTTTGTGGTTCACAAGGAGACCGTTGAGCGCTTTTCGAGAGAGAGAGAGAGAGAGAGAGAGAGAGA	GTGATGGTGGGTTTGGGCCTTCAGCTTCCCGATATCCGACGGTAGTGTNNNNNNNNGATTGGTGGATCTTCCTCTTTG	17965798	17965828	-	10	16243_0320_SNP_a
1:17975677-17975856/16,29/+	0.978198	1	17975677	17975692	1	AGAAGAAGCCAAAACC	17975828	17975856	2	CCACTGGTCTTCAAAGTCTTGAGATGGTG	17975693	17975827	GGATCAGGTAAAGGTTGGTTCTCGTTGACTATGAAATCAGATCTGGGAGGTTCAAGACTAGGAGCTACACTAGTAGGAGGAGGAGGAGGAGGAGTAGAAGCAAGCTTGTAAGATTTCTTAACCATGACAAGAATC	CCACTGGTCTTCAAAGTCTTGAGATGGTGCTTCAGCTTCCCGATATCCGACGGTAGTGTNNNNNNNNAGAAGAAGCCAAAACC	17975767	17975786	+	0	16245_0321
1:18036627-18036806/16,29/-	0.980192	1	18036791	18036806	1	AGAGCTCGAGGATAGA	18036627	18036655	1	GTGATGGAGTGAAAAATCAGTTTGTGTTC	18036656	18036790	AAATCATCAGAACTCAGAGAAGAAGAAGAAGAAGAAAAAGAAGAAGAAGGGAGAGGGAAGTAGTAAGCACAAATCACGACGGCAAAATGAAGTAGCTTCTGCTTCAGAACAAGTTATAATTCCAGATTTTCTCTT	GTGATGGAGTGAAAAATCAGTTTGTGTTCCTTCAGCTTCCCGATATCCGACGGTAGTGTNNNNNNNNAGAGCTCGAGGATAGA	18036742	18036773	-	0	16305_0322
1:18040224-18040403/19,26/+	0.980944	1	18040224	18040242	1	TCTCTCTCTCTCGAAGCTC	18040378	18040403	1	CTACCATCTCCTCCTCCTTCTTCTTC	18040243	18040377	TCAACAAAAAAAATCGAAGAAGAAGAAGAAGAAGACGTAACAATGGAGCCTCCTTTTGAAAGATCGAAACGTCTCCACAACTTCTCTTTGCCTCAACTCCGTTGGGGTCAACAAAGATTCCTCAGATGCGTCAAT	CTACCATCTCCTCCTCCTTCTTCTTCCTTCAGCTTCCCGATATCCGACGGTAGTGTNNNNNNNNTCTCTCTCTCTCGAAGCTC	18040258	18040277	+	0	16307_0323
1:18373391-18373570/17,28/-	0.858483	1	18373554	18373570	2	GATTAAATGTGTGTGTG	18373391	18373418	1	ATCTGCTTTCATTATTCTTTGGTACAGT	18373419	18373553	TGTGTGTGTGTGTATAGAGATATTTATCTTTGCATGTACGCGTCTGCATTTAATAGTTTGTTGGTTTCGTATTAATAATTGAAGTTTCTCACAAAACAATACTTCAACATCTGCTCCTGAAGTCTTTGTTAGATA	ATCTGCTTTCATTATTCTTTGGTACAGTCTTCAGCTTCCCGATATCCGACGGTAGTGTNNNNNNNNGATTAAATGTGTGTGTG	18373541	18373563	-	0	16640_0324
1:18381468-18381647/17,28/-	0.969917	1	18381631	18381647	1	GCGTAGGTTGTCGTTTG	18381468	18381495	1	GCTTAGTAAGTAGAGAGTTCTTTAAGCT	18381496	18381630	CATTGATCCCGCATTTGAGCAGAAAACGTCGAGACTGTAAACAAAACATCCACAAAGCAAAATCCAGTTTGGGAGTCTATACATGAGTGGAGCTTTTCCTTTCTTCTTCTTCTTCTTCTTTGGAGGCAAAAAAGG	GCTTAGTAAGTAGAGAGTTCTTTAAGCTCTTCAGCTTCCCGATATCCGACGGTAGTGTNNNNNNNNGCGTAGGTTGTCGTTTG	18381511	18381530	-	10	16646_0326_SNP_a
1:18407601-18407780/16,29/-	0.981649	1	18407765	18407780	1	GAAGATTGGAGCAGAA	18407601	18407629	1	GGTGGTTTGCATTTGCGTGAAAAAGATTC	18407630	18407764	GAGCAATGAGAAGGAAGAGTAATAATCTTTGAAACATGGCTGTCTTCACCAAAAAGTAAAAACCCCAAAATTTAAGAAGAAGAAGAAGAAGAAGCAAGTAGCTACTTCATCATCATGCTAGAATATAGATTTGTT	GGTGGTTTGCATTTGCGTGAAAAAGATTCCTTCAGCTTCCCGATATCCGACGGTAGTGTNNNNNNNNGAAGATTGGAGCAGAA	18407667	18407691	-	0	16666_0327
1:18474858-18475037/16,25/+	0.966541	1	18474858	18474873	1	GTCTTTGGAGGAAGGA	18475013	18475037	1	CGTTGTCGTTTGAAAACCGGGCTGC	18474874	18475012	TCAACATCATCATCATCATCATCATCATCCTCATCACCATCATCATCATCATCATCATCATCATCATAATAAGAACAAGACTTTGGCTTTGGTTTTGATTTTGATTGTTCAATACCTTGAAACAAAAGCTCAACGAAAT	CGTTGTCGTTTGAAAACCGGGCTGCCTTCAGCTTCCCGATATCCGACGGTAGTGTNNNNNNNNGTCTTTGGAGGAAGGA	18474873	18474940	+	10	16741_0328
1:18475633-18475812/16,27/-	0.885058	1	18475797	18475812	1	AGCAGAACTTAGCCGA	18475633	18475659	1	CGAAAAGTGTGTATCTGATAGATTGGA	18475660	18475796	TTTTAACTTATATATATATATATATATATATATATATATATCTATATATATATTGAGTAAATCCAACAGAACACGTATAAGTCAACTGTCGTTTGTGCGAAACAATACTCTCCCAAGTTTCGTAAGAAACAAGCAAA	CGAAAAGTGTGTATCTGATAGATTGGACTTCAGCTTCCCGATATCCGACGGTAGTGTNNNNNNNNAGCAGAACTTAGCCGA	18475744	18475788	-	0	16743_0329
1:18489013-18489192/19,26/-	0.91797	1	18489174	18489192	1	GTTGAATTCCTGCTAGTAC	18489013	18489038	1	CCAAATTTGGGTTGTGAAGCCTGAGG	18489039	18489173	ATTAACTTTCTTGCGTTTCCCCAAACATACATACTAGTTGTAAACATATATATATATATATATATATATATATATATATATATATATATTGAGATTCTTGTCCTTCTTTCAGAGTCAGGTTGGAGATGCTTATAA	CCAAATTTGGGTTGTGAAGCCTGAGGCTTCAGCTTCCCGATATCCGACGGTAGTGTNNNNNNNNGTTGAATTCCTGCTAGTAC	18489085	18489128	-	0	16760_0330
1:18537063-18537242/26,18/+	0.990937	1	18537063	18537088	1	GCTTCAAGCAAAGGTCTGCCTTTACG	18537225	18537242	1	TTTGACCCACCGCATCCC	18537089	18537224	TGGAGCAATCTACAGGGACAACATAGTCGAACAAAGCCACTTGTCTAGTTCAGTTTTCAAAACTAAAACCCAATATAATACTTTGACACAAAAGTAGTAAAACGTAATTACAAAATAAATAAATAAATAAATAAAA	TTTGACCCACCGCATCCCCTTCAGCTTCCCGATATCCGACGGTAGTGTNNNNNNNNGCTTCAAGCAAAGGTCTGCCTTTACG	18537201	18537223	+	0	16782_0331
1:18577263-18577442/16,28/+	0.847068	1	18577263	18577278	1	CATACAAAATAAATAG	18577415	18577442	1	TACCTTCTCGATATCCTCTATGTCGGCC	18577279	18577414	TATAAGAAAATGGAAAAAAAATAAAATATATATATATATATATATATAACAAAGGTTACAAAATTCACATTGTCCATAGGAAAGGGAAAAAGATTATCATGGCAGATTAATTAATGAACCTCACATAAGAAAATCA	TACCTTCTCGATATCCTCTATGTCGGCCCTTCAGCTTCCCGATATCCGACGGTAGTGTNNNNNNNNCATACAAAATAAATAG	18577304	18577326	+	0	16815_0332
1:18671909-18672088/16,29/-	0.805206	1	18672073	18672088	2	AATAGTAGGAACAAAA	18671909	18671937	1	GTGAATTCTCACTCCATAAAATGGGTATG	18671938	18672072	AAACAGAACCAGGCCCAAACCTCTCGGCCCATATTATTTCAACTTCACATATATATATATATATATATATTAAGGATGATTGTTGACCAAAAAAAAGAAAAAAATCATTGAGAACATAATTAAACAAATTAGACT	GTGAATTCTCACTCCATAAAATGGGTATGCTTCAGCTTCCCGATATCCGACGGTAGTGTNNNNNNNNAATAGTAGGAACAAAA	18672003	18672024	-	0	16893_0333
1:18676585-18676764/17,25/+	0.981022	1	18676585	18676601	1	TCAAACTCAACACAGAA	18676740	18676764	1	GTGGACTGGTATGCTTGACTTGGTG	18676602	18676739	TGGTCAAATGGCTTCTTCCTCGCAGCAGCCGAATGATGATGATGATGATGATGATGATGATGTCACCATTGTCGAGAAAACGAGTCTGAAGTCAACTCCTTCTAATGGAGGACCAATAAAAACGATTATATTTTCTCA	GTGGACTGGTATGCTTGACTTGGTGCTTCAGCTTCCCGATATCCGACGGTAGTGTNNNNNNNNTCAAACTCAACACAGAA	18676634	18676663	+	0	16894_0334
1:18779723-18779902/16,29/+	0.979725	1	18779723	18779738	8	ATAGAAGAAACAGAGA	18779874	18779902	1	GCGAGTCGACGTGTAGTTTCGATTCGGAA	18779739	18779873	ATTAGGGTTTCATCTAATCTGCCATAGTTATGGATCCGCAGGTGGTGGTCGATAAGAAATCTGAGGAGCCTGATCTGAAGCGTCAGAAGCTGGAGGAGGAGGAGGAGGAGGATTGCGAAGAGATGTCTTCGTACA	GCGAGTCGACGTGTAGTTTCGATTCGGAACTTCAGCTTCCCGATATCCGACGGTAGTGTNNNNNNNNATAGAAGAAACAGAGA	18779830	18779850	+	0	16984_0335
1:18822574-18822753/18,27/-	0.97856	1	18822736	18822753	4	GAAAATAGGGTTTTGATC	18822574	18822600	1	CCCACCGTTGTTCTTAGGGTTTTGATC	18822601	18822735	AAAACAAGTAGTAACTTGTGACGAAGGCTCAAGCGAGGAGTAAGAGTGGTGATCAAAAAACGGAGAAGAGGTACTAGGGTTTTGACCAAAATCAGAAGCAATTTGAGAAGAAGAAGAAGAAGAAGAAGAAGAAGA	CCCACCGTTGTTCTTAGGGTTTTGATCCTTCAGCTTCCCGATATCCGACGGTAGTGTNNNNNNNNGAAAATAGGGTTTTGATC	18822601	18822630	-	10	17029_0336_SNP_a
1:18849838-18850017/16,29/+	0.982341	1	18849838	18849853	11	CGAGACGAAGAAGAAG	18849989	18850017	6	GTTTGGCTCGAAGAGAAATGACTCGATTT	18849854	18849988	AAGAAGAGGAGGTTGGATCGAATAGGTTTAAGGTGAGAAATAGAAAGAAGAAGAAGAAGATCGAAGAAGAAAGAGAATTGGGGATTAGGGTTTTGCGAAACGAAGAAGACGAAGAAGAAGAAGAAATGGCTAAGT	GTTTGGCTCGAAGAGAAATGACTCGATTTCTTCAGCTTCCCGATATCCGACGGTAGTGTNNNNNNNNCGAGACGAAGAAGAAG	18849955	18849978	+	0	17063_0337
1:18933477-18933656/18,26/-	0.899213	1	18933639	18933656	1	TGGTACTGTTGGGCCTCG	18933477	18933502	1	GCTTCTGAGGTGGTTGAGGCTGGGGT	18933503	18933638	TAATACGGCCCACAATGATACGGCTGCCACATCGGCATCGGTTGAGGAGCGGAAGACGAAACAAGAACAGGAACCGGAGCCGGCCGAACAAGAGCTGGGGCTTGGGCTTGGGCTGGGGCTGGGGCTGGGGCAGTAG	GCTTCTGAGGTGGTTGAGGCTGGGGTCTTCAGCTTCCCGATATCCGACGGTAGTGTNNNNNNNNTGGTACTGTTGGGCCTCG	18933508	18933545	-	0	17128_0338
1:19029525-19029704/19,26/-	0.957965	1	19029686	19029704	1	CTTTGAGAATTTCTTCAAG	19029525	19029550	1	GTGTGTGTGTGATCTTTGGTTTGTGG	19029551	19029685	CTGATTTTGCTCAAGTTGATTTCCTATCTTTTAGGTTTCGAATTTCTATAAATAAATTAGGTCAACAGATGTTTGACACTGTACACTTAAGTGCTTAGAGAAACTACATATATATATATATATATATATATATGT	GTGTGTGTGTGATCTTTGGTTTGTGGCTTCAGCTTCCCGATATCCGACGGTAGTGTNNNNNNNNCTTTGAGAATTTCTTCAAG	19029553	19029578	-	10	17213_0339_SNP_a
1:19100878-19101057/16,27/-	0.98509	1	19101042	19101057	1	AGACGAAGAACAAACA	19100878	19100904	1	CTTGGCGTGGGAAGATTTGACGGTGGT	19100905	19101041	AAACTCTCTCTTTCTCTCTCTCTCTCTAATAAGTAAGGTTTTGATCTTTTTCAAGATCAAACAAAAACAATGGAGTTAGAGAGTACGAGCAATGGCCGACGTCCGCCGCCACCGGCAGAGATTGGCCGTGGGGCGTA	CTTGGCGTGGGAAGATTTGACGGTGGTCTTCAGCTTCCCGATATCCGACGGTAGTGTNNNNNNNNAGACGAAGAACAAACA	19101015	19101038	-	0	17285_0341
1:19122099-19122278/16,29/+	0.981588	1	19122099	19122114	4	ATCTTCTTCCTCTTGG	19122250	19122278	1	CAGAAAAAAACATGATCATCCAACATCAC	19122115	19122249	CATCTCCTCGACTTAAAGAGAGAGAGAGAGAGAGAGAGGCTAAACAGAAGAGAATCCAAAAACACAAACTTATCTTACTAGTTACCACTTTCCAAAGAAAGTTTTCAAAAGGACATAAACATAAATAATGTCAAA	CAGAAAAAAACATGATCATCCAACATCACCTTCAGCTTCCCGATATCCGACGGTAGTGTNNNNNNNNATCTTCTTCCTCTTGG	19122131	19122152	+	0	17293_0342
1:19291776-19291955/17,28/-	0.747117	1	19291939	19291955	2	AAAAATAAACTCAATTG	19291776	19291803	3	GCAATGCTAATTTTCCAACGAATCCCCC	19291804	19291938	AAAAAAAAAGACTGAAAATAATTTCTTAAAGACTGAAAAATAATAATAATAATAATAATTAAGTGAAAGACATTTTTTTGTTAAAGATGAGAAAACATATACACATATACCTATACTTGTAGCACTCACAAAAAT	GCAATGCTAATTTTCCAACGAATCCCCCCTTCAGCTTCCCGATATCCGACGGTAGTGTNNNNNNNNAAAAATAAACTCAATTG	19291880	19291900	-	0	17425_0343
1:19439701-19439880/20,23/+	0.879682	1	19439701	19439720	1	GAGTAAACAACTGTTCATCG	19439858	19439880	1	CCGTAACCAAGCCGGACTGACAG	19439721	19439857	AAAAAGTAGAAATAAAACGAGTTTTTTTTTGTCGTAAAAAACCTCAAGTAAGTAATTGATCAATATATATATATATATATATATATTTCTTTTTCTAACATTTTTAAACTAAATGATATTTTGTTTAAAAATTAAAT	CCGTAACCAAGCCGGACTGACAGCTTCAGCTTCCCGATATCCGACGGTAGTGTNNNNNNNNGAGTAAACAACTGTTCATCG	19439783	19439806	+	0	17595_0344
1:19452784-19452963/16,29/-	0.976396	1	19452948	19452963	1	GGATTCACAAATCACA	19452784	19452812	1	CTGTTGTATTTGTCTTCAGGCGGAATGTG	19452813	19452947	ATTAGTCCTTGGCTTTAAATAATAACCCTAAAAAGAGAGGAATCATTCATCAAGAAGAAGAAGAAGAAGAAGAAGAAGAAGAAGAAGAAGAAGAAGTAATGTTTTTAAGATGATCTATAGATATATGCTATAGGG	CTGTTGTATTTGTCTTCAGGCGGAATGTGCTTCAGCTTCCCGATATCCGACGGTAGTGTNNNNNNNNGGATTCACAAATCACA	19452852	19452896	-	0	17603_0346
1:19484839-19485018/17,28/+	0.97297	1	19484839	19484855	1	GTGGTGGTCATGCTGGT	19484991	19485018	1	GGAAATAGGACGACGATTGAAGATCATC	19484856	19484990	AGTGGACTCAACGGAATTGAAGAAGATGGAGCCCTAGATAACGATGATGATGACGATGATGATGATGATGACTCTGAAATGGAGAATCGTGATCGTTTGATTAGGAAATCGAGAAGCCGTGGAGGTAGTACTAGA	GGAAATAGGACGACGATTGAAGATCATCCTTCAGCTTCCCGATATCCGACGGTAGTGTNNNNNNNNGTGGTGGTCATGCTGGT	19484898	19484926	+	0	17631_0347
1:19492439-19492618/18,27/+	0.968372	1	19492439	19492456	1	GTTATTTGTGGAGGGATG	19492592	19492618	1	GGTGACCAGCGGTGGCTTCCACATCTG	19492457	19492591	AAGAAGAAGAAGAAGAAGAAGAAGAAGGAAGCCATTGATATTCATGTTGATGATACCTACACTTGAACGATCTTGGATGCTTCGACGGTGAACACACACACTTCTTCTTTCCACCGCCACCGTCACCACCGCTAC	GGTGACCAGCGGTGGCTTCCACATCTGCTTCAGCTTCCCGATATCCGACGGTAGTGTNNNNNNNNGTTATTTGTGGAGGGATG	19492456	19492487	+	10	17642_0348
1:19715449-19715628/18,27/-	0.966591	1	19715611	19715628	1	ACTCCATACAGAGATCAT	19715449	19715475	1	TGGTCGATCATAATTCGTCTTGCTCTG	19715476	19715610	AGATAGGTCATTAAGAAATCACTGGTAGAAAAAAAAATACTTTGAACACATTAACACAAACAAACAAACAAACAAAAAACTATATTTGCAAATATTGATGAACTTAAAATCACCAATTACGAAACCTTACCAGAA	TGGTCGATCATAATTCGTCTTGCTCTGCTTCAGCTTCCCGATATCCGACGGTAGTGTNNNNNNNNACTCCATACAGAGATCAT	19715531	19715555	-	0	17835_0350
1:19744499-19744678/16,29/-	0.851925	1	19744663	19744678	1	AAAATGGCTCAGAGTG	19744499	19744527	1	GTTTGTTTGTTTTTGTGAAAAGAAAGATG	19744528	19744662	ATTGAGAAATATATTTATATATATATATATATATATATATGTACACGTGGTTGTTCAGAATAGCCTACAGTGGTAATGTAGTGAAACTAATCATTTGGGGAAGATTAAAGAAAAAAGAGAAGAGAGACGTGTTTA	GTTTGTTTGTTTTTGTGAAAAGAAAGATGCTTCAGCTTCCCGATATCCGACGGTAGTGTNNNNNNNNAAAATGGCTCAGAGTG	19744623	19744654	-	0	17871_0351
1:19753366-19753565/19,26/+	0.840484	1	19753366	19753384	2	CTAATAATGGAGATTGGAG	19753540	19753565	1	GCGATGTAACAGATACACAACCAATG	19753385	19753539	GCTATATAGATGGGATATATATATATATATATATATATATATATATATATCAGGAATTTTTATTACCATACGGAAAAACCATGGGTGTTATTTACAACCAAGAAATATGCTATATACAGTATCATGTGCTTGAGTTAGAGATGTTTGTATGATTT	GCGATGTAACAGATACACAACCAATGCTTCAGCTTCCCGATATCCGACGGTAGTGTNNNNNNNNCTAATAATGGAGATTGGAG	19753399	19753434	+	0	17887_0033
1:19797215-19797394/17,28/-	0.966609	1	19797378	19797394	1	GAGAGGATTTACAACCA	19797215	19797242	1	GCCTTCGGCTAAAACGCGGCTTCGGTAA	19797243	19797377	AGACAACCTTTTTCTTGTAGTGATATATATATATATAAATATATATATATATAATTACAATTATGAGATTAGTGTTCAAGAAAGCTAGACGACGGCCGTGGAGTCGCACATCTATGAGATTCGATCTCTGGCTTC	GCCTTCGGCTAAAACGCGGCTTCGGTAACTTCAGCTTCCCGATATCCGACGGTAGTGTNNNNNNNNGAGAGGATTTACAACCA	19797325	19797355	-	0	17922_0038
1:19851592-19851771/17,28/+	0.963998	1	19851592	19851608	1	ACACGCCAACAAATCAA	19851744	19851771	1	ACAGAGGAAGCAAGAAGAGAGAGAAGAG	19851609	19851743	AGATGAAGAAGAAGAAGAAGAAGAAGACGTAATTGAATTTTGCAGACTAACCCATGACTAAATTTCTCTTCTTTTGTCTAAAGATTGTTTCTTTTTTAGAATTTGTCTCTGTTTCTGAGAATTCAAGAAGCAAAA	ACAGAGGAAGCAAGAAGAGAGAGAAGAGCTTCAGCTTCCCGATATCCGACGGTAGTGTNNNNNNNNACACGCCAACAAATCAA	19851608	19851635	+	10	17965_0355
1:19857282-19857461/19,25/-	0.971497	1	19857443	19857461	1	CACGGAGACGAACAGGAGA	19857282	19857306	1	GGAAGATGAAGAACACTAATGGGCC	19857307	19857442	CAAGAGAAAACTCTGAAAAGTTTCCTTTTATGGTTTCTCAAACGCGAAAGCCATTGAAGAAGAAGAAGAAGAGTGCGCAGACACGAAGAGAGAGAGAGAGAGAGAGAGAGAGAGAGAGAGCGGGAGAAACAGATAA	GGAAGATGAAGAACACTAATGGGCCCTTCAGCTTCCCGATATCCGACGGTAGTGTNNNNNNNNCACGGAGACGAACAGGAGA	19857323	19857356	-	0	17970_0356
1:20004548-20004727/17,28/-	0.98032	1	20004711	20004727	1	TGACACCAAAAAAAGGA	20004548	20004575	1	GTATTTGGATTAGGTTAAGGACTTTGGG	20004576	20004710	GTTACCATGATCTCTCTCTCTCTCTCTCTCTCTCTGGAATAGTATAAATTTTCAAATAATCACGTTTTCTTCCAACCAATGCAACCGTATTTATACTCATTATCTGTTTTCTGGTCAGAAATTATTATTTATTTT	GTATTTGGATTAGGTTAAGGACTTTGGGCTTCAGCTTCCCGATATCCGACGGTAGTGTNNNNNNNNTGACACCAAAAAAAGGA	20004676	20004700	-	0	18083_0357
1:20006569-20006748/18,23/-	0.969951	1	20006731	20006748	1	CATCGGTGCATGGAAACG	20006569	20006591	1	GCATGTGCTTGTGTATAACCGGG	20006592	20006730	TGTAGTTTCAATATTTTTGTTGGGATATATATATATATATATATTTATCCATACAAGTTCTTCGTTAATTGTATATCTTTTGAAGTATCATTCATATAATAGATTGTTCTAAGTTCGTAATTATGCAAAAATGGTCTAT	GCATGTGCTTGTGTATAACCGGGCTTCAGCTTCCCGATATCCGACGGTAGTGTNNNNNNNNCATCGGTGCATGGAAACG	20006683	20006706	-	0	18092_0039
1:20042313-20042492/16,29/+	0.981611	1	20042313	20042328	1	GAAGCAAAGAACAGAA	20042464	20042492	1	TGAGAACACAACTTCGAGAAGATATAGCC	20042329	20042463	CAAATTAAAGCAGCAAAAGAGAGAGAGAGAGAGAGAGAGAGAGAGAGAGAGAGAGAGAGAGAGAGAGAGAGAGAGAGAGAGAGAGAGAGAGAGAGAGAGAGAGAGAGAGATGTTTTGCCTTGTCTAAGTGGCAAA	TGAGAACACAACTTCGAGAAGATATAGCCCTTCAGCTTCCCGATATCCGACGGTAGTGTNNNNNNNNGAAGCAAAGAACAGAA	20042346	20042438	+	10	18144_0040_SNP_a
1:20148354-20148533/19,23/+	0.977129	1	20148354	20148372	1	CCATGACGAACGAAACAAA	20148511	20148533	1	GGAGATTCTGTGTTTGATGGCGG	20148373	20148510	GCATTCATATACAAATAAAACAGAGCATTTACAGTAAAACCAAGAACACAATATTAATTATTAAACATGGAAGACAACAACAACAACAACAACAACAACAACAATCTGGTAACAGACCAATCCGCTTTGTTCGTGTTT	GGAGATTCTGTGTTTGATGGCGGCTTCAGCTTCCCGATATCCGACGGTAGTGTNNNNNNNNCCATGACGAACGAAACAAA	20148446	20148476	+	0	18207_0358
1:20219036-20219215/17,27/+	0.981426	1	20219036	20219052	1	AAACAGAGAAACCAACC	20219189	20219215	1	CTTTGGTGCTTTGGATTTGGTAAGAAG	20219053	20219188	AAAAGATTTTTTTCTCTCATAACTCAAAAATTATTATTTTTAATTATATCATCATAAGTAGAAACTGAGCAACCAAATCATAACATCACTACCAAATAAATTAAGCGAACAAGAAGAGAGAGAGAGAGAGAGAGAC	CTTTGGTGCTTTGGATTTGGTAAGAAGCTTCAGCTTCCCGATATCCGACGGTAGTGTNNNNNNNNAAACAGAGAAACCAACC	20219164	20219187	+	0	18293_0359
1:20251126-20251305/16,29/-	0.966777	1	20251290	20251305	1	TAACCACAAGAACAAC	20251126	20251154	1	GACATCACGACCAGTTCCATCATGTTCAT	20251155	20251289	TTTCAAACTAGTATCCAAACAAGCTATACATGTCATCATCATCATCATCATCATCTAAGATCAAACCTGAAAACGGATACTTATAGGTAGAGGGAAAGAGATTCTACTAACATTGTTAAATTTGAAAATCCCATC	GACATCACGACCAGTTCCATCATGTTCATCTTCAGCTTCCCGATATCCGACGGTAGTGTNNNNNNNNTAACCACAAGAACAAC	20251235	20251257	-	0	18327_0360
1:20251631-20251810/16,27/-	0.98011	1	20251795	20251810	1	GGAACAAAGCAAAAGG	20251631	20251657	1	GCAAGTTCTTGAGCCTCTTTTGCTTGG	20251658	20251794	CCAGTGATGATGATGATGATGGTTATGATGATGATGATGATGATGTGGATAAGAGTTGGACATTACATCGGTTAAGGATTTCTACGGCTAACTCCAAGATTATGCATTCGGAATTTAGCATCAAACTGTATCTATCT	GCAAGTTCTTGAGCCTCTTTTGCTTGGCTTCAGCTTCCCGATATCCGACGGTAGTGTNNNNNNNNGGAACAAAGCAAAAGG	20251750	20251790	-	0	18328_0041
1:20261974-20262153/17,28/-	0.969721	1	20262137	20262153	1	GTTCGATAGAGTTGATG	20261974	20262001	1	CGTTTGAGGGAAGCTCCTCAACAACCAC	20262002	20262136	AAGAATACTAGAGAATGAAAAAGATGTATCGATGATTCAGAGAGAGAGAGACGGGTCAAAAATCAAATAAGAAATTTGCGAAACAAGCAACCTTTCTTCTTCTTCTTCTTCTTCTTCTTCACAGCAAATCAGCCA	CGTTTGAGGGAAGCTCCTCAACAACCACCTTCAGCTTCCCGATATCCGACGGTAGTGTNNNNNNNNGTTCGATAGAGTTGATG	20262017	20262043	-	0	18331_0361
1:20267565-20267744/16,27/+	0.981371	1	20267565	20267580	1	GATCAACACGAAGAAA	20267718	20267744	1	GGAGGGAGAAGAAGAAGGAAGAGAAGG	20267581	20267717	CGCGTTTTTGTTTTTGGTAAACAAAAATAAGCGATCCTGAGGAACGAACAAAACGAAAAAAAAAAAAAAAAGCTTGGTGTGGTGGTGGCTAAACGAGAAAGAGAGAGAGAGAGAGAGATCCAACAGAAAAAAAAAAT	GGAGGGAGAAGAAGAAGGAAGAGAAGGCTTCAGCTTCCCGATATCCGACGGTAGTGTNNNNNNNNGATCAACACGAAGAAA	20267675	20267698	+	0	18332_0362
1:20327617-20327796/16,28/+	0.962959	1	20327617	20327632	1	CAGGTAAAAGAAGAGG	20327769	20327796	1	GGGATCACCATCGTTGACTCAAAAGCCG	20327633	20327768	TCAAAGTGTCCAAGTCCAAGCCAGATAAGGTAATCATAGTGGTGGATGATGATGATGATGATGATGATGATGAGTCTTATGAACAGAGCACGAAAGCCGCTGATGCTTTGGACAGAGTTTCGGAAACGCCTTCGAA	GGGATCACCATCGTTGACTCAAAAGCCGCTTCAGCTTCCCGATATCCGACGGTAGTGTNNNNNNNNCAGGTAAAAGAAGAGG	20327677	20327705	+	0	18380_0363
1:20394194-20394373/16,24/+	0.986393	1	20394194	20394209	1	TCTTGGTGTGGTGGCG	20394350	20394373	1	GCTAGAAGCAGAACATTAGTGAAG	20394210	20394349	GAAACTTCTCGCTCTTGCTCTTTGCATTTGCGTGTGTGATTAATCTCCTTCTCTGCTTTTTAAGAGTCAAAAGATAGAAATGATTATGTAAAAAAAGGATCAGTCTTTGTGTGTGTGTGTGTGTGTGTGTATGTAGATAT	GCTAGAAGCAGAACATTAGTGAAGCTTCAGCTTCCCGATATCCGACGGTAGTGTNNNNNNNNTCTTGGTGTGGTGGCG	20394317	20394343	+	0	18420_0365
1:20433191-20433370/18,26/-	0.966397	1	20433353	20433370	1	GAAAGCAAAGAGTTTTCG	20433191	20433216	1	TTGCCAAACAACGGGCATCATCCGAC	20433217	20433352	AAATTTATATATATATATATATATATATGGGATAGAAGAAAAAAAAAGAAATTGGTAGGGGACGGGGAGATAATGCCTCCCCAAATTTATTCATAGCAACATACAAAAACTTAACAAGCAACAACATGCCATCGAA	TTGCCAAACAACGGGCATCATCCGACCTTCAGCTTCCCGATATCCGACGGTAGTGTNNNNNNNNGAAAGCAAAGAGTTTTCG	20433325	20433347	-	0	18453_0042
1:20538687-20538866/16,27/+	0.975824	1	20538687	20538702	1	GTGGCGGGGTTGGGGG	20538840	20538866	1	GTGATGGTAAAGACACAGACGTTGGTG	20538703	20538839	AAGAATGGGAAGCAGAAGAGGCGGTTTTGATGATGAGTTTGATAGAAAGAGTAGCCGAGGACGCGGTTCAGGTAGTTTCAGGGGATCTAACAGAGGAGGAAGAGGAGGAGGAGGAGGAGGAAACCGGCATGGGCATA	GTGATGGTAAAGACACAGACGTTGGTGCTTCAGCTTCCCGATATCCGACGGTAGTGTNNNNNNNNGTGGCGGGGTTGGGGG	20538795	20538823	+	0	18577_0366
1:20606375-20606554/16,29/+	0.912202	1	20606375	20606390	1	AATAGTTTCGGGTTCC	20606526	20606554	1	GTGTACATTGCTCATTGGGAACTGAACGT	20606391	20606525	AATTTTAACATAGAAGTAAACTACCACTACGATTACCAAATAATTAACGCTCGATTTAATTATAAAGAAAAAGTATGAATCGTCGCTAGTATATATATATATATATATATATATATATGTTCATAAGAAAACCAT	GTGTACATTGCTCATTGGGAACTGAACGTCTTCAGCTTCCCGATATCCGACGGTAGTGTNNNNNNNNAATAGTTTCGGGTTCC	20606480	20606508	+	0	18626_0367
1:20629582-20629761/24,21/+	0.974337	1	20629582	20629605	1	TCGGTCTGTTGATGTCGTAAGTCG	20629741	20629761	1	TCCCTCCCTAAAGGTTTCAAG	20629606	20629740	AAAAGAGACGAGAATCTATTGAACTGAAACACGAATTCTTTGTTATGTTAGAGAGAGAGAGAGAGAGAGAGAGAGAGAGAGACATTATAAGATAAACCTTCTAGAAGTATCCTTTTAACAATTTATTATTTTATT	TCCCTCCCTAAAGGTTTCAAGCTTCAGCTTCCCGATATCCGACGGTAGTGTNNNNNNNNTCGGTCTGTTGATGTCGTAAGTCG	20629655	20629687	+	0	18639_0368
1:20729518-20729697/19,26/-	0.980678	1	20729679	20729697	1	AACAACAACGAGCGATAAC	20729518	20729543	1	TCGATCCCGTGGCCGTTTAGCACCTT	20729544	20729678	AATGGAAGCAGTAGTGCTTCTGCTACAACCAGCCATGGAGCTGAGAACAGCGATGGAAACCGGCGCCAAGAAGAAGAAGAAGAAGAAGAAGAGGAGGAGGAGGAGGAGAACGAGAACAATGACGGAAGCGGATTC	TCGATCCCGTGGCCGTTTAGCACCTTCTTCAGCTTCCCGATATCCGACGGTAGTGTNNNNNNNNAACAACAACGAGCGATAAC	20729587	20729611	-	0	18699_0369
1:20848916-20849095/17,25/+	0.938076	1	20848916	20848932	1	ATAACGGGGAAGCAAAG	20849071	20849095	1	ACTGGACAGTCGTATGGGGCGTGTG	20848933	20849070	TCAGTGCTTTGCTTTTACGTCATTTGAAGGGTTTGTTTGCTTTTGGTTGAGGGAGAGAGGGAGAGAGGGAGAGAGGGAGAGAGGGAGAGAGAGAGAGGGTAAAGTGTTTGGTGTTATGTTCCTTGGCTTATTTCTCTA	ACTGGACAGTCGTATGGGGCGTGTGCTTCAGCTTCCCGATATCCGACGGTAGTGTNNNNNNNNATAACGGGGAAGCAAAG	20848981	20849031	+	0	18774_0370
1:20962626-20962805/16,29/+	0.968082	1	20962626	20962641	11	TTCTCTCTTCTTTCTC	20962777	20962805	1	CATCGATAATACCCATTCATGTATGGATA	20962642	20962776	GAGAAATCGGCGAATCTGAGAACTAAGCATCAACAACAAGAACAATGAGAGCGAAGGTAACATCTTCTTCTTCTTCTTCTTCTTCTTCTTCGATTCAATATTGTTCTTTGTATTAGAACTTATTAGCGTTAGTTT	CATCGATAATACCCATTCATGTATGGATACTTCAGCTTCCCGATATCCGACGGTAGTGTNNNNNNNNTTCTCTCTTCTTTCTC	20962704	20962732	+	0	18846_0371
1:21181647-21181826/22,22/-	0.943671	1	21181805	21181826	1	GGCTTCTCTCGATCCTTTGATC	21181647	21181668	1	GCCATGAGAGGTTCAAAATCAC	21181669	21181804	ATCGAACATTGTAATTCCATTGTAGTTAAATTGTTTGCGTAAATGACTGAGAAATGTTTTGCGGACGTCTGGTCCATGGAAACTCGTGAAGACATTGTATCTCCAGGTGCGACGTGAAGAAGAAGAAGAAGAAGAA	GCCATGAGAGGTTCAAAATCACCTTCAGCTTCCCGATATCCGACGGTAGTGTNNNNNNNNGGCTTCTCTCGATCCTTTGATC	21181668	21181689	-	0	19084_0373
1:21191697-21191876/16,27/+	0.937098	1	21191697	21191712	1	GTGGGCGACTTTAGGG	21191850	21191876	1	GTTTTATCATTCGCTTCACTCCATATG	21191713	21191849	AGAAGAAGAAGATCAAGAATCAGCGGAAGAAATTAAACAAGTTTGGAATAATTTGATCCTTTCATTATACTTGAAGATATATATATATATATATATATATATATATATATATATATATAATTGAATTTATGTTTTAA	GTTTTATCATTCGCTTCACTCCATATGCTTCAGCTTCCCGATATCCGACGGTAGTGTNNNNNNNNGTGGGCGACTTTAGGG	21191789	21191831	+	0	19092_0374
1:21538201-21538380/18,27/+	0.984325	1	21538201	21538218	1	ACCCCAACACAAGAAAAA	21538354	21538380	1	GTTCTTAACTTAGCGGCTTTCCCATTC	21538219	21538353	ACACACACACACACACACACACACAAATCAGCTTCAGGTATAAGAGACCTAAGAATAAAAAGATGTTTGGAATTAGTTACCTTCTCACAGTTTCTGCATTGTTCATCAAAGGATAAATGTGATGAAGCTAATTGT	GTTCTTAACTTAGCGGCTTTCCCATTCCTTCAGCTTCCCGATATCCGACGGTAGTGTNNNNNNNNACCCCAACACAAGAAAAA	21538219	21538243	+	10	19390_0377_SNP_a
1:21554053-21554232/18,27/+	0.947071	1	21554053	21554070	1	GGGTTTCCTTATGATTGG	21554206	21554232	1	GTTGGTAGTTTAAGAGATTTGGTTTGT	21554071	21554205	GAAGATTACAATGAAGAAGAAGAAGAGAAGAAGAAGAAGAATGTTGATATTTCGTTTGATGATATTCCTGTGAATAGGTATCAGGATCTTTATTCTCTTGAGGGTTGTTTGAAAGATAAGATTTTGGACGATGTT	GTTGGTAGTTTAAGAGATTTGGTTTGTCTTCAGCTTCCCGATATCCGACGGTAGTGTNNNNNNNNGGGTTTCCTTATGATTGG	21554083	21554111	+	0	19403_0378
1:21554170-21554349/16,29/+	0.971278	1	21554170	21554185	1	GAGGGTTGTTTGAAAG	21554321	21554349	1	GGGTTGTGGGAGTGAAGACTAGAGGTATG	21554186	21554320	ATAAGATTTTGGACGATGTTGTTGGTAGTTTAAGAGATTTGGTTTGTCAGAAATCTGATAAGGCATGTGAGAAATCAAGAGTTGGTGATGTTGATGATGATGATGATGATGATGATGATAAGAGTTTGGTTTCGA	GGGTTGTGGGAGTGAAGACTAGAGGTATGCTTCAGCTTCCCGATATCCGACGGTAGTGTNNNNNNNNGAGGGTTGTTTGAAAG	21554271	21554304	+	0	19405_0379
1:22051923-22052102/16,29/-	0.980421	1	22052087	22052102	1	GACAAAACAAACCTAC	22051923	22051951	1	CCATACAAAGCAAATGTGACAGCCTCTTC	22051952	22052086	AAAGAAAGAAAGAAAGAAAGAAAGAAGCAAAAATGCTTACAGTGATTGTTCTCGCAGACCAAAATTGCAGGCAAATCCCAAAGAGCAGAAATATTCAAAGCTTCAAACAACTGTCCCTGATTCGCAGCACCATCA	CCATACAAAGCAAATGTGACAGCCTCTTCCTTCAGCTTCCCGATATCCGACGGTAGTGTNNNNNNNNGACAAAACAAACCTAC	22052061	22052086	-	0	19821_0380
1:22056414-22056593/17,26/-	0.981597	1	22056577	22056593	1	AGAGATCAGAGTAATAA	22056414	22056439	1	GTGATTATGGTGGTGGTGGTGGTGGA	22056440	22056576	TGGTGGTGGTGGAGGAGGAGGAGGAGGAGGAGGAGGAAGATACTATACTTCTTCTTCTGCTTCTCCGTCACGACCTTCTTCTTCTTCTGCATCTGCTGCTTCGCCGTCGCGAACTTCCTATGCTACAAGTGCCGGTA	GTGATTATGGTGGTGGTGGTGGTGGACTTCAGCTTCCCGATATCCGACGGTAGTGTNNNNNNNNAGAGATCAGAGTAATAA	22056540	22056566	-	0	19827_0381
1:22067243-22067422/17,28/-	0.981064	1	22067406	22067422	1	CCATCAAAATAGAGAGA	22067243	22067270	1	CCTTGTTATGGGTTTGGTTGGTAATCCA	22067271	22067405	AGAAAATAAAAATCATTTTCTGAACATAGTAAATGTGTTTTTAACAACAACAACAACAACAACAAAAGCATAGTACATGTGAGAAACAAAAAGACGAATTTGAACATTAAATCAGTAACATACATACCAAACAAC	CCTTGTTATGGGTTTGGTTGGTAATCCACTTCAGCTTCCCGATATCCGACGGTAGTGTNNNNNNNNCCATCAAAATAGAGAGA	22067341	22067363	-	0	19832_0382
1:22079026-22079205/16,29/+	0.916556	1	22079026	22079041	3	TGGTGCTGATGATGAT	22079177	22079205	1	GAATCAGTAGTATATATCTACTCTATATG	22079042	22079176	GAGAGAGAGAGAGAGAGAGAGCGCGCGAGGAAATCATGGCTGGTAAACAGAAGAAGAGACATGATGATTACTGATTGAAATATTATATATGTACACCATTGAAATAAGTTATAAAAGTGTCGTAAATCGTCAAAA	GAATCAGTAGTATATATCTACTCTATATGCTTCAGCTTCCCGATATCCGACGGTAGTGTNNNNNNNNTGGTGCTGATGATGAT	22079042	22079062	+	10	19838_0046
1:22205306-22205485/19,26/-	0.918887	1	22205467	22205485	1	GAAAATTGACTTTGAAACA	22205306	22205331	1	ATTGGAGTTTCTGATTTCTAGGGCAC	22205332	22205466	ATGGAATAATGAGCCAATAATTTATTGACACGTGTAACAATAAACAAAAGTTACTTAAGATTTTTGTCGTAAAGAAGGGAAAGAAATTGTAACTTTGACACACACACACACACACACAGATAAAGAGTAATTAAA	ATTGGAGTTTCTGATTTCTAGGGCACCTTCAGCTTCCCGATATCCGACGGTAGTGTNNNNNNNNGAAAATTGACTTTGAAACA	22205349	22205369	-	0	19969_0383
1:22209544-22209723/16,29/-	0.97444	1	22209708	22209723	1	AGAGAAAACAACAAAC	22209544	22209572	1	GGTTCCTTGGATTTCTTATTCCCTTTTGA	22209573	22209707	TAGTAGCAGAAACAGTTGGAAACGAACCTAGGAGTTTCATGGCCACTGGTGTCGTTGTCATCATCATCATCATCATCATCATCATCATCAATCAGAGAATAAGTCGAAGATTCCATGGGCCTTTTCTTTCCATAA	GGTTCCTTGGATTTCTTATTCCCTTTTGACTTCAGCTTCCCGATATCCGACGGTAGTGTNNNNNNNNAGAGAAAACAACAAAC	22209614	22209650	-	0	19977_0384
1:22245531-22245710/17,28/+	0.976819	1	22245531	22245547	1	GGAAGATCGAATGTAGC	22245683	22245710	1	GTGATTGTTTGCTTTGATTTTAGGTGTG	22245548	22245682	TTAACCCATAATATATTGTCTAATGAAGGGGTATGCATCAATGGAGTTTTGTATTACAAAGCTTCCCGAATTGTTGAATCGTCATCTGACGATGACACGTCTGATGATGATGATGATGATCATGAACGGTCTGAT	GTGATTGTTTGCTTTGATTTTAGGTGTGCTTCAGCTTCCCGATATCCGACGGTAGTGTNNNNNNNNGGAAGATCGAATGTAGC	22245649	22245672	+	0	19995_0385
1:22253080-22253259/16,28/+	0.88479	1	22253080	22253095	1	GACTACATACTAATTG	22253232	22253259	1	CGTCCGATGCTAGCACAATAGAGGAGCT	22253096	22253231	ATATATATATATATATATATATCGTGATCTTATTATGAAGTGATTGCCGGATGTTATAGGAAAGTTGCAACGTCTAAAACATCTCAATTTGGAAATGACGAAGAGTATTGATGAGATATCTTCAATTCAAACTTTT	CGTCCGATGCTAGCACAATAGAGGAGCTCTTCAGCTTCCCGATATCCGACGGTAGTGTNNNNNNNNGACTACATACTAATTG	22253096	22253117	+	0	20002_0047
1:22441980-22442159/18,27/+	0.970994	1	22441980	22441997	1	GGTTTTTCGCGATGGCTA	22442133	22442159	1	CCGTAATAATCTCCATCGTTCCTTGCT	22441998	22442132	AAAAAGGCACAAAGTGATAGAATGAGATTTTGAAAGCAAAAGCGAAATTGTCGATATCCTTTTTTCTTATCCGTGAAGAAATTCCAAAAGAAGATATGATTACGAATTACAATGATGATGATGATGATGATGATG	CCGTAATAATCTCCATCGTTCCTTGCTCTTCAGCTTCCCGATATCCGACGGTAGTGTNNNNNNNNGGTTTTTCGCGATGGCTA	22442109	22442132	+	0	20153_0386
1:22469074-22469253/16,26/-	0.982032	1	22469238	22469253	1	AGAGGTGTTAGAAAAA	22469074	22469099	1	GGGAGGTTTCTGTTGGATGTTTTTGG	22469100	22469237	TATGGGTGAGTTATCTCTTAGAATGTGTAACAACGCCTCTTTGTTTCATTTCCTTTTTGTTTCTCAGATTCTGACTTAGATAGTGCGTATGGCTGTCATGTAATATATATATATATATATATATGTTGTATTTTCTCT	GGGAGGTTTCTGTTGGATGTTTTTGGCTTCAGCTTCCCGATATCCGACGGTAGTGTNNNNNNNNAGAGGTGTTAGAAAAA	22469114	22469135	-	0	20170_0387
1:22491353-22491532/16,25/-	0.957817	1	22491517	22491532	1	AAAGCGTGCGAATGGA	22491353	22491377	1	GATTCTGAGTTTAGGGTTTTGTTTG	22491378	22491516	AAACAAAAAATTAATAACACGTGTCCTCTTCGTTCACAAGTTTCCTCTTTCCTTAGCACAGTATGTTTTTTGACTTCTTCGCGTCGGCGATATTATCCAGAAACAGTAGTGTCGAAGAAGAAGAAGAAGAAGAAGGAGA	GATTCTGAGTTTAGGGTTTTGTTTGCTTCAGCTTCCCGATATCCGACGGTAGTGTNNNNNNNNAAAGCGTGCGAATGGA	22491378	22491403	-	10	20181_0388
1:22494969-22495148/17,27/+	0.961125	1	22494969	22494985	1	GTAGGAGGTGGTGATGG	22495122	22495148	1	GAGATCTTCATGATAGTGTCTTGTTCG	22494986	22495121	AAGAGGTAAAGAAGCAGTTTTTATAAAGGATAGTGGAGGAGGAGGAGGAGGAGGCGGCGGTGGCGGGAAAAGTTGTGATGAATTTTCATATTTTTCTGAATGATTGAGTTTGGATTCAGATGTTGACTCCAATGAA	GAGATCTTCATGATAGTGTCTTGTTCGCTTCAGCTTCCCGATATCCGACGGTAGTGTNNNNNNNNGTAGGAGGTGGTGATGG	22495020	22495039	+	10	20188_0389_SNP_a
1:22513900-22514099/16,29/+	0.777187	1	22513900	22513915	1	GTAAAAATGAACTATA	22514071	22514099	1	CTCCGGATCTCGGCAGCTGGACGTGTCTT	22513916	22514070	TATTGCATTCATATGGTTAAAAATGATAAATATATATATATATATATATATGTATATATATATATATATAATGTAGAAAAACAAGAGCATACCCATTAGATGTATCAAACGTGAGTCCTACGGTATATTTTGCTTCCTCGAGAGCCAATTGAAAC	CTCCGGATCTCGGCAGCTGGACGTGTCTTCTTCAGCTTCCCGATATCCGACGGTAGTGTNNNNNNNNGTAAAAATGAACTATA	22513941	22513985	+	0	20205_0037
1:22524245-22524424/16,28/-	0.885623	1	22524409	22524424	1	AATTGTACCTGAAATG	22524245	22524272	1	GTGGAAGGGGTACATATATGCTTTTGGG	22524273	22524408	TATAGCTTAAAGTACTGTTGCATTTTCATTATAAAAAATGCATGCAAGTCATGTGAACAACCTTTGACCAAAAAAGAAAAAAAAAAGGTCATGTGAATATATATATATATATATATATATATGCTTTTTTGTGTGT	GTGGAAGGGGTACATATATGCTTTTGGGCTTCAGCTTCCCGATATCCGACGGTAGTGTNNNNNNNNAATTGTACCTGAAATG	22524287	22524312	-	0	20218_0392
1:22588642-22588821/19,26/-	0.978746	1	22588803	22588821	1	CAAACAAATTTACATGACA	22588642	22588667	1	CTCTCAAACAGCGGCTCTCAAGGCTC	22588668	22588802	TAAAGGTACAAAGGAAAAATTAAATCTTTTTTTTTTTGTTTATAGAGCAGAGAGAGAGAGAGAGAGAGAGAGAGACTTCAAGAAAATCTGAAAAAAGAAACAGTGCATACACAAACCAGAATGTTACAAGGAGAA	CTCTCAAACAGCGGCTCTCAAGGCTCCTTCAGCTTCCCGATATCCGACGGTAGTGTNNNNNNNNCAAACAAATTTACATGACA	22588728	22588759	-	0	20262_0393
1:22619261-22619440/16,29/-	0.973997	1	22619425	22619440	2	GAGGTTCAAATGTGAA	22619261	22619289	1	GTTTAGGGCACTCTTTGAGGAATTCAGCG	22619290	22619424	ATTCTGAATCTACACATAGCAAACAAAAGTTTTAGTGAACTTATATGTAGACGATAAGGAAGCAGTGAGGGAGGGACAAGGAGGGAGAGAGAGAGAGAGAGAGAGAGAGACTTACATCGATCACAACCTGTTTGA	GTTTAGGGCACTCTTTGAGGAATTCAGCGCTTCAGCTTCCCGATATCCGACGGTAGTGTNNNNNNNNGAGGTTCAAATGTGAA	22619315	22619344	-	10	20293_0395_SNP_a
1:22767541-22767720/16,29/-	0.98103	1	22767705	22767720	1	GGAGTAATGAATGGGA	22767541	22767569	1	GCATATGAGCTGGTTAGCAATGAGTTGTG	22767570	22767704	CAAGAAGAAGAAGAAGAAGAAGCATAGACATATTTTCTTTTTTTACGTGTGATGGTGAGATTTGTGTTTTTGAAGGGTTTAATGTTTGGTGCTCTGTTTTTGTCAAAAGAGTGGAGAAATGAGTTGTCTTTTTTA	GCATATGAGCTGGTTAGCAATGAGTTGTGCTTCAGCTTCCCGATATCCGACGGTAGTGTNNNNNNNNGGAGTAATGAATGGGA	22767683	22767703	-	0	20386_0396
1:22786733-22786912/17,28/-	0.968242	1	22786896	22786912	1	GACAATAGAGGAGGAAA	22786733	22786760	1	CGCCGAAGCCATCTCTAAGAGGAAATAG	22786761	22786895	AGTATTCTTCTTCTTCTTCTTCTTCATCTGCTCGATCTTTTACATTTCCGGTAAGATCAAAATCAAAACCAAGTTCGTTTCGCGGCGGAGGAGAAGAAGAATCAGACGGGAAAATGTTGGAGAAGATCGGATTAC	CGCCGAAGCCATCTCTAAGAGGAAATAGCTTCAGCTTCCCGATATCCGACGGTAGTGTNNNNNNNNGACAATAGAGGAGGAAA	22786867	22786891	-	0	20411_0397
1:22995096-22995275/16,29/+	0.941605	1	22995096	22995111	6	AGTGGCGGTGGTGGTG	22995247	22995275	1	GCGGTGGTGGTGTTGATGGTAGCGGAAGT	22995112	22995246	GCGGTGACGGTAGCAGCGGCAGCGGTAGTGGAAGCGGAAGTGGAAGTGGAAGTGGAACTGGAACCGCTAGTGGCCCTGATGTGTATATGCATGTAGAAGGTGGTGGAGGCGGTGGTGGAGGTGGTGGCGGCGGAG	GCGGTGGTGGTGTTGATGGTAGCGGAAGTCTTCAGCTTCCCGATATCCGACGGTAGTGTNNNNNNNNAGTGGCGGTGGTGGTG	22995138	22995174	+	0	20572_0398
1:23036636-23036815/17,28/-	0.980265	1	23036799	23036815	1	GTCAAAGCACTGAAACA	23036636	23036663	1	GGACATATTTAGGAGAGAAGACGTTCCC	23036664	23036798	GAAACACAAGTTACAGAATAAGGTCGATAAACAGAGTACTGAAGACTGTAACGAAAAGGAAGAAGAAGAAGAAGAAGAATTGAACATGCCAGAGATTTCGAGCAATGAAAATGAAGAAACGGGCAGTGCTCTTTG	GGACATATTTAGGAGAGAAGACGTTCCCCTTCAGCTTCCCGATATCCGACGGTAGTGTNNNNNNNNGTCAAAGCACTGAAACA	23036720	23036740	-	0	20602_0399
1:23112145-23112324/19,26/+	0.885265	1	23112145	23112163	1	GGATGATGAAGGTAACTTG	23112299	23112324	1	CATGCTTAACTTCAAGATTCCAACAC	23112164	23112298	ACTGAGATAGGCCAGTTGATGAATCTCGAGGTCTAAACCTAACTAATCCATATATATATATATATATATATATGTAGTCTCTTTGAATTTCTTTGCATAAAATTTCATTAGATAGACACTCAACTTCATTTTGTA	CATGCTTAACTTCAAGATTCCAACACCTTCAGCTTCCCGATATCCGACGGTAGTGTNNNNNNNNGGATGATGAAGGTAACTTG	23112213	23112236	+	0	20668_0400
1:23132315-23132494/16,27/+	0.969496	1	23132315	23132330	13	TGGTGGAGGTGGTGGT	23132468	23132494	1	CGTAGTGGTGAGGCCACCGCCAATCAT	23132331	23132467	AGCAAGCCGCCTCCACATCACGGTGGAAAAGGTGGTGGTAAACCCCCACCCCACGGTGGAAAAGGTGGAGGACCGCCGCATCATGGTGGAGGAGGAGGAGGAGGAGGGAAATCACCGCCGGTTGTTAGACCTCCTCC	CGTAGTGGTGAGGCCACCGCCAATCATCTTCAGCTTCCCGATATCCGACGGTAGTGTNNNNNNNNTGGTGGAGGTGGTGGT	23132418	23132437	+	0	20695_0401
1:23134071-23134250/17,28/+	0.916335	1	23134071	23134087	1	GTCTATGTACCTACACA	23134223	23134250	1	GGCCATCCAACTCGGAAATGACAGGGCA	23134088	23134222	TAATAATAATAATAATAATAATAATAATAATAATAATAATAATAAGATATAATTCCTTACACAAGTTGAGTAAGAAAAAAACAATTATAGTTCACGGGCTCCATATAGATCCATTGAATTTTAATTATTCATTAG	GGCCATCCAACTCGGAAATGACAGGGCACTTCAGCTTCCCGATATCCGACGGTAGTGTNNNNNNNNGTCTATGTACCTACACA	23134087	23134140	+	0	20703_0052
1:23207914-23208093/16,24/+	0.982073	1	23207914	23207929	1	CGAGATCAGAAGGAGA	23208070	23208093	1	ATCGGGGGTGACGGATGCGTGGAG	23207930	23208069	TGATGAAGCAATGCTTATCCGCGCCACCAATAGAGCTGCCGATGATGATGATGATGATGATGATGATGATGACGATGATGGAGCAGAAAACACTTTTAGTGAATCCCTTTGAGTTGCAAAACCCATATCCAGAATCTCCT	ATCGGGGGTGACGGATGCGTGGAGCTTCAGCTTCCCGATATCCGACGGTAGTGTNNNNNNNNCGAGATCAGAAGGAGA	23207970	23208009	+	0	20755_0402
1:23285994-23286173/17,28/-	0.916687	1	23286157	23286173	1	ACCTAAACCCATCTCCA	23285994	23286021	1	GTGTCGTTGATCCCTCGAGATTCTGTGG	23286022	23286156	CAATCTCTCCTTCTCCTCCTCCTCCTCCGTCTTCTTCTCACCGGAAACGTAATTCCTCCGCCGTGGAAGCTCTGAATCATCATCATCATCATCCTCATCATCATCATCAAGGGTCTTATAATGTGACGCCTCTTA	GTGTCGTTGATCCCTCGAGATTCTGTGGCTTCAGCTTCCCGATATCCGACGGTAGTGTNNNNNNNNACCTAAACCCATCTCCA	23286048	23286081	-	10	20800_0403_SNP_a
1:23382310-23382489/16,27/+	0.942712	1	23382310	23382325	2	TTTGGTTCAGGCTCGT	23382463	23382489	1	CGAGAAGTGCTTTCACCATGGAAAAAG	23382326	23382462	CATCATCATCATCATCATCATCATTCTCCTTCCCCTTCTCCTTCATCTGATTTTGATGATAGTGGTTCAAAATCTCCTTCTCCTTCACCAAAATCAAAAGAAAAATCATCAACATATTGCATGATTGGCTGTTCTTT	CGAGAAGTGCTTTCACCATGGAAAAAGCTTCAGCTTCCCGATATCCGACGGTAGTGTNNNNNNNNTTTGGTTCAGGCTCGT	23382325	23382349	+	10	20877_0404
1:23401129-23401308/19,24/+	0.965791	1	23401129	23401147	1	GTCTTGCGCTCGATCGGTT	23401285	23401308	1	GTTGCTGATGTTGCTGCTACTGCT	23401148	23401284	TGTTGTTGTTGTTGTTGCTGTTGTCAAGAGAGATGCTTCTTCCAAGTGGTCTGCTAGAAGGAGTTTCCTTGCGAGAGAAGCTACTACTGCATGGTAAGTCCAATCTCTGTGTGTTCATGGGAAAATGCGCTGATACT	GTTGCTGATGTTGCTGCTACTGCTCTTCAGCTTCCCGATATCCGACGGTAGTGTNNNNNNNNGTCTTGCGCTCGATCGGTT	23401147	23401171	+	10	20885_0405
1:23409000-23409179/19,26/+	0.943537	1	23409000	23409018	1	ACAAGAACACATATAAAAG	23409154	23409179	1	GTTAGCCCAACCACAAGTAGCACCAC	23409019	23409153	CTTTTACTATATGATTATGATGATGATGATGATGATTAGCAGGTCCATTTAGAAGTTGGGAAACAGCTAAGGTAATGACACCATTTGCAATGTTTGTTCCCATTCTCTCCTTTGAAAAGCATCACTAATGCAACC	GTTAGCCCAACCACAAGTAGCACCACCTTCAGCTTCCCGATATCCGACGGTAGTGTNNNNNNNNACAAGAACACATATAAAAG	23409029	23409054	+	10	20896_0406
1:23425890-23426069/17,28/+	0.983184	1	23425890	23425906	1	GGGTTTGGATTATTGGG	23426042	23426069	1	GAAGGTTTGGGTTTGAGTAGAAACTCAG	23425907	23426041	TATGGGTTGCAATGTATGATGCATATGGTTTGTGTTTGTGTTGAGTATCGTAGGAGGAATAGTAGAAGAAGAAGAGATTTGAGTCCAAGATCTAGCTCTTCTTCTTCTTCTTCTTCTTCTTCTATGGATGAAGAA	GAAGGTTTGGGTTTGAGTAGAAACTCAGCTTCAGCTTCCCGATATCCGACGGTAGTGTNNNNNNNNGGGTTTGGATTATTGGG	23426003	23426029	+	0	20904_0407
1:23443601-23443780/20,21/+	0.908486	1	23443601	23443620	1	GAGGAAGAGGATAAGATCAA	23443760	23443780	1	GGTGATCCTGAAGAATTGTTG	23443621	23443759	TAATGATGATGATGATGATGATTTGAGTCACTTCATTGTAGATGAAGATGATCATGGTGCTCAAGGAATGAGGAGGAAGAAAATGAAATATAAGCAAGGAACTGATTCGAACGCTTTACGATACGCTAATGATGTATTT	GGTGATCCTGAAGAATTGTTGCTTCAGCTTCCCGATATCCGACGGTAGTGTNNNNNNNNGAGGAAGAGGATAAGATCAA	23443623	23443642	+	10	20926_0408
1:23517617-23517796/16,29/-	0.891883	1	23517781	23517796	1	TCCTATTTGCATGCAA	23517617	23517645	1	GCAAGTGAGGAGATCTTCTCTTGAAGGAG	23517646	23517780	ATACAAATCAAAAATATATATATATATATATATATATATATATATTGCATAGGAAGACAAGTATAAATAAATCTGATTATAGAAGCATACCTGAATGAAAATTCTAGCATTCCAATCATGTAGTGAGGATAAATT	GCAAGTGAGGAGATCTTCTCTTGAAGGAGCTTCAGCTTCCCGATATCCGACGGTAGTGTNNNNNNNNTCCTATTTGCATGCAA	23517736	23517767	-	0	20973_0409
1:23542128-23542307/16,29/+	0.979157	1	23542128	23542143	2	GGAAGAAGACAGATGA	23542279	23542307	1	GTGAACTTTTGAATTGAGAGAGGTCTTTC	23542144	23542278	GACAATTCAGGGAGAAGAAGAGAAAAAGAGAGAGAGAGAGAGAGAGAGAGAGAGAGAGAGAGAGAGAGAGAGAGAGAGAGAGAGAGAGAGAGAGAGACTAACAGTTTAATGATTCTGATTTATACTTTTAATATT	GTGAACTTTTGAATTGAGAGAGGTCTTTCCTTCAGCTTCCCGATATCCGACGGTAGTGTNNNNNNNNGGAAGAAGACAGATGA	23542155	23542240	+	0	20988_0410
1:23560371-23560550/16,28/+	0.980191	1	23560371	23560386	1	AGGGATCCAAGGAGAG	23560523	23560550	1	GAGAGAAACATGGAACCGAGGTTGCAAA	23560387	23560522	AAGAAGAAGGAAAATATCAGATGCTGAAAAGTTTTCAGTGGAACAATATTCTTCTGGTGGTTTTTTCGGTGTACGGTTGAACACGAATGGGAGACAACAACAACAACAACAACGATTAGCTAAGCCTTTAGTTACA	GAGAGAAACATGGAACCGAGGTTGCAAACTTCAGCTTCCCGATATCCGACGGTAGTGTNNNNNNNNAGGGATCCAAGGAGAG	23560480	23560499	+	0	21002_0411
1:23669071-23669250/16,29/+	0.778531	1	23669071	23669086	1	AAGATAATGTGAGAGA	23669222	23669250	1	GACGGTAACTTAAATTTAATAATTAGGCC	23669087	23669221	ATCTTTTTCATTATTTTGTTTTATTTTATTACAGATATCGATGATGATGATGATGATGATGATGATGATGATGTGAGATGTTCCAAGAGAACTCATTGCCGTGTTGGCAAAAATAAAGTTTCAAGTTCAAGTTTC	GACGGTAACTTAAATTTAATAATTAGGCCCTTCAGCTTCCCGATATCCGACGGTAGTGTNNNNNNNNAAGATAATGTGAGAGA	23669126	23669166	+	0	21084_0412
1:23669755-23669934/18,27/-	0.966519	1	23669917	23669934	1	GGTTTAACATGGAACAAA	23669755	23669781	1	GTAATCCAATGGAGATGTTAAAGGCGG	23669782	23669916	CACAATTCAAAGGTAAACAAAAATCTTCTTAGTGTCTTACTTAAAAGAAACACTAAAGGAAAAATCGTAATAACAAATGTAATGTTTGATTGCAGAAACGAGAACGAGATGAAGAAGAAGAAGAAGAAGAAGAAA	GTAATCCAATGGAGATGTTAAAGGCGGCTTCAGCTTCCCGATATCCGACGGTAGTGTNNNNNNNNGGTTTAACATGGAACAAA	23669783	23669810	-	0	21085_0413
1:23690486-23690665/18,26/-	0.964935	1	23690648	23690665	1	ACCAAAAAACAAAGCACC	23690486	23690511	1	ATCTCTCTAACGGCGAGGCAATGGGT	23690512	23690647	TCATTGACTATTAAATTAGTACTAATACATTAATTAAGTTATTATTCCTATATATAAATCTCACCCATTCTCCACCTTATCATCACAATCCAAAACTCTCTCTCTCTCTCTCTCTCTGTCTCTTGTCTTATCATTT	ATCTCTCTAACGGCGAGGCAATGGGTCTTCAGCTTCCCGATATCCGACGGTAGTGTNNNNNNNNACCAAAAAACAAAGCACC	23690525	23690552	-	0	21097_0414
1:23721789-23721968/16,28/+	0.967522	1	23721789	23721804	1	AGAAGCAATGGAGAGT	23721941	23721968	1	CGTTGTACGTAGAGAGGTTTTGTTGTAG	23721805	23721940	TTTTAAAAGGAGAGGAGACAAAGGTCGGGTCGGGTCGGGTCGGGTCGGGTCCCAGGGGTGGGGCCTGAGATATTTCTTCATCGATCTAACCTTAAAACGATGTCTCATCGACTTTCTATTTTCATGTGTTATTACT	CGTTGTACGTAGAGAGGTTTTGTTGTAGCTTCAGCTTCCCGATATCCGACGGTAGTGTNNNNNNNNAGAAGCAATGGAGAGT	23721827	23721855	+	0	21123_0415
1:23878255-23878434/16,29/-	0.869214	1	23878419	23878434	1	AAGAGGGTTCATGAAA	23878255	23878283	1	AGAAGATTGATCATCTCTTATCGTCTTAG	23878284	23878418	AGACAAAAATGATATGTAAATAGAAAGTTCATAATTGATGATATAGCAAATATTTTCAAAACCTGATAACTCACAATTTCCAATCTTGATTTTCATAATATATGATGATGATGATGATGATGATGTCGAGCTCTT	AGAAGATTGATCATCTCTTATCGTCTTAGCTTCAGCTTCCCGATATCCGACGGTAGTGTNNNNNNNNAAGAGGGTTCATGAAA	23878294	23878317	-	0	21221_0416
1:23953408-23953587/19,21/-	0.978806	1	23953569	23953587	1	TGGAGGAGTCGCCGGAGGT	23953408	23953428	1	GACGGTGGAGCGTGGCGGTTT	23953429	23953568	TTAACAGAGTCTACTTCCGGCGGTTTAACGGCGGCAGGTTTAAGTTTAGTTTCTAGAGATTTGCTGACTTCTTCCCATGTTTTAGGAGCGTCATCACCATCATCATCATCATCATCATCATCCTCGTCGAGACGGTCGAA	GACGGTGGAGCGTGGCGGTTTCTTCAGCTTCCCGATATCCGACGGTAGTGTNNNNNNNNTGGAGGAGTCGCCGGAGGT	23953447	23953478	-	0	21294_0417
1:23995299-23995478/16,28/+	0.805524	1	23995299	23995314	1	CTATAGATGAAATGGG	23995451	23995478	1	GCTAGGTCCTTGTTATGTAATATATACA	23995315	23995450	ATGTGTGTGTGTAGTTGTGTTACGTGTGCATATAGCAAGCCTCCCTATATTTAATATGTGGTTATGGTTTGACATTATTGCTAATATATATATATATATATATTACTTAGCTTGTAGGGTTTTGTAATCCTAGCTA	GCTAGGTCCTTGTTATGTAATATATACACTTCAGCTTCCCGATATCCGACGGTAGTGTNNNNNNNNCTATAGATGAAATGGG	23995398	23995417	+	0	21321_0053
1:24013164-24013343/16,29/+	0.924851	1	24013164	24013179	1	GTACTTAATGACAACG	24013315	24013343	1	GTAGTGGGAAATAGCATGATGGTGTTACC	24013180	24013314	ATCTATGAGCCTTGAGTATATCTGGGTTGTAGTTATATACGTAACTTAATTAATGACATTGCATACATATACAAAGTTATATATATATATATGTGTGTGTGTGTGTGTGTGAAAAGGGAATGATGATAGTTGATG	GTAGTGGGAAATAGCATGATGGTGTTACCCTTCAGCTTCCCGATATCCGACGGTAGTGTNNNNNNNNGTACTTAATGACAACG	24013271	24013290	+	0	21332_0054
1:24019814-24019993/17,28/-	0.975119	1	24019977	24019993	1	GGAAATTGCAGATAGCG	24019814	24019841	1	GGTTACAGAAGGGTGAGGAGATGGAAGG	24019842	24019976	TCGTACCCTAATGTAGCGACCAGTGGGATCTTTCTGGACGAAGTCAGCCTCTTCCATGGCAGATATTCTAACCTAATGATACTAATAATCCGGAAGCAGAAGAAGAAGAAGAAGAAAGGAGGGATGATGATTGGT	GGTTACAGAAGGGTGAGGAGATGGAAGGCTTCAGCTTCCCGATATCCGACGGTAGTGTNNNNNNNNGGAAATTGCAGATAGCG	24019861	24019884	-	0	21337_0418
1:24032864-24033043/16,29/+	0.978021	1	24032864	24032879	1	AAGAGGACAACGAAAC	24033015	24033043	1	GGCAATCAGACCATCTTGGTGTTCTTTGC	24032880	24033014	AGGGGACTGAGATTATATAAAATGTAGAATGTAGAGAACATATATATATATATATATATGTACCTGTGGGCTGTTGGACATTGACAAAGAGAGATTGGTTGGAAGAGGAAAGCCAAGAAGTGCAGAAAGTGCAAT	GGCAATCAGACCATCTTGGTGTTCTTTGCCTTCAGCTTCCCGATATCCGACGGTAGTGTNNNNNNNNAAGAGGACAACGAAAC	24032919	24032938	+	0	21348_0419
1:24035101-24035280/16,25/+	0.984567	1	24035101	24035116	1	AACGACGACTGACATA	24035256	24035280	1	GCGTAGTTGATGGAGGTTGGTAGGG	24035117	24035255	CATATAAGTGCACTCCATTCCAACATGTAGTAGCATTCGAATTGGTTTTGGACTGACAAAATTGAGTAACTACAACAAATAATAATAATAATAATAAAAGTATGTGAAGGAAAAATAAAAAAGTCAAAAGACCTTAAAT	GCGTAGTTGATGGAGGTTGGTAGGGCTTCAGCTTCCCGATATCCGACGGTAGTGTNNNNNNNNAACGACGACTGACATA	24035194	24035213	+	0	21350_0420
1:24142954-24143133/16,29/-	0.979744	1	24143118	24143133	1	ACAACCAGAAAAAAAG	24142954	24142982	1	GGTCTTGGTTCCTTGCTCAGCTGCACGTC	24142983	24143117	AATTTATTTATTTATTTATTTATTTATATATTTACATTAGACTGATAAAATAATGATGCTGTAAATGGAACCAAAACTATGGATAATTTATTTAAGACCGGAGAGATTATTGTCGGTCTCGAGCAAACAATCCAT	GGTCTTGGTTCCTTGCTCAGCTGCACGTCCTTCAGCTTCCCGATATCCGACGGTAGTGTNNNNNNNNACAACCAGAAAAAAAG	24143084	24143116	-	0	21427_0421
1:24169162-24169341/16,29/+	0.756024	1	24169162	24169177	4	ACTCTTGATGATCCTT	24169313	24169341	1	CCTAAGTTATCAAAATAAAATAGAAACAG	24169178	24169312	TGATGTGTGTGTGTGTGTGTGTGTTTTTAAGCAAACGAGATGTTGTGGCTAGATGCACCCAATAATGATTCCATCTCACGATGTCTAAGTTTCCAACCTAGTAATCTTCTTGTAATAGGAGTTAATTGGGCTTAT	CCTAAGTTATCAAAATAAAATAGAAACAGCTTCAGCTTCCCGATATCCGACGGTAGTGTNNNNNNNNACTCTTGATGATCCTT	24169181	24169201	+	0	21447_0422
1:24305565-24305744/16,29/-	0.974832	1	24305729	24305744	2	AGGAATTCATCTGCGA	24305565	24305593	1	GCAGAGTTCATGATGAATGGTTTGCTGAT	24305594	24305728	TCCTGCTTCGTCACTACAATTGGTGTGATTCCAGATTCTGTTATTCAGATATTACAGCTATTGTGTGTGTGTGTGTGTGTGTGTGTGTGTGCTTAGAGGAACTTTTCATTTGTGTAAATGTTTTTAGGTGTGTGA	GCAGAGTTCATGATGAATGGTTTGCTGATCTTCAGCTTCCCGATATCCGACGGTAGTGTNNNNNNNNAGGAATTCATCTGCGA	24305638	24305667	-	0	21531_0423
1:24366321-24366500/16,29/+	0.98027	1	24366321	24366336	1	GGAGAAGACTTACATC	24366472	24366500	1	TCAACGTGTTTCTGCTGATTTTGACCGTT	24366337	24366471	TACAGAGAAGAGGAGGAGTGGAGAGGAAAGGATCGATCAAAACGTGGAAGACAATCCAAAATACTTTGAGAAAAAGACCGTCAAAAGAATCGTCGTCGTCACTGAGCCGAAGAAGAAGAAGAAGAAGAAGAAGAT	TCAACGTGTTTCTGCTGATTTTGACCGTTCTTCAGCTTCCCGATATCCGACGGTAGTGTNNNNNNNNGGAGAAGACTTACATC	24366445	24366470	+	0	21585_0424
1:24438251-24438430/18,24/+	0.939115	1	24438251	24438268	2	GTGTTTTATCACCACAAC	24438407	24438430	1	GCTGAGACAGCAACCCATTTTGTG	24438269	24438406	TTCTTCTTCTTCTTCTTCTTGATTCAGTTTCTCAGATTTGGGTTTTGCTTCTTCCTCCAAAGGCTCAATCACTGGTTCCATGGGTTTGATTGGATCTGAGGGTTTAACACTAGAGGGAAGAGAAGGGGAAGGTTTCTT	GCTGAGACAGCAACCCATTTTGTGCTTCAGCTTCCCGATATCCGACGGTAGTGTNNNNNNNNGTGTTTTATCACCACAAC	24438268	24438288	+	10	21638_0425_SNP_a
1:24449101-24449280/16,29/-	0.944569	1	24449265	24449280	1	GTAGTGGCGAATGGAG	24449101	24449129	1	TTTAAATCCCTAATCCAACACAACATGTC	24449130	24449264	AAAAAAAGGCTGATATCGCACAAAATACTCCAAAATTTCTTATTTAAACTAAATAACTGATGAGATTTAAATAATAATAATAATAATAAATCTTTGAAATATCATAAATATCACCTAAATCAAACAAATAAAATC	TTTAAATCCCTAATCCAACACAACATGTCCTTCAGCTTCCCGATATCCGACGGTAGTGTNNNNNNNNGTAGTGGCGAATGGAG	24449176	24449195	-	10	21649_0426_SNP_a
1:24529150-24529329/18,26/-	0.970597	1	24529312	24529329	1	AAGAACATAAATACGAGC	24529150	24529175	1	GCCTCGTGATAGAACTGATGAACAGG	24529176	24529311	TGAGAGAGAGAGAGAGTACACAAATTTGTTTCACATTCCTCTAAATTCCAAACAAATTGTTTATAGAGACACCAATCTTCTTCTTCTTCTTCTTCTCTGACAAAGTTATGGGCGAACAACAAATCTCAGTTACAGT	GCCTCGTGATAGAACTGATGAACAGGCTTCAGCTTCCCGATATCCGACGGTAGTGTNNNNNNNNAAGAACATAAATACGAGC	24529216	24529236	-	0	21711_0427
1:24628481-24628660/16,29/+	0.888855	1	24628481	24628496	1	ATATATCTGCATGTAG	24628632	24628660	1	GTCGATATTGTTTTCCTCGACTCCGATCC	24628497	24628631	ATGATTAAATATATATATATATATATATTTGTTCTAGACTCCAATCAAATGACGATATAATGGTGCAGGCTCAGGAGAGTTATGTATAGGACTATGTGCATGATGAGATTCATAATCCACATAATTCCAAGACCG	GTCGATATTGTTTTCCTCGACTCCGATCCCTTCAGCTTCCCGATATCCGACGGTAGTGTNNNNNNNNATATATCTGCATGTAG	24628505	24628524	+	0	21808_0057
1:24679938-24680117/17,28/+	0.822229	1	24679938	24679954	1	CGATCGAACTCATGGTT	24680090	24680117	1	GAGGGAAATGAAATCCTTTTTCTTTTAG	24679955	24680089	AAGATACGAAATAAGAATTATAGAGATAGGAATATATATATATATATATGTATATAAACTAATTAAGAATATAGACATATCTAACTAGTCACATAGTCATAATAGTGTAAAGTTACATAAGCTTAATAAGAATAA	GAGGGAAATGAAATCCTTTTTCTTTTAGCTTCAGCTTCCCGATATCCGACGGTAGTGTNNNNNNNNCGATCGAACTCATGGTT	24679986	24680010	+	0	21849_0058
1:24764369-24764548/18,27/+	0.787048	1	24764369	24764386	1	CGAAGAGTTTTATATAAA	24764522	24764548	1	GCTGTCTTCTGGTGAGTGAAGTCAGTG	24764387	24764521	TAAAAAAGTTATACTATTTTTTATTTACGTAGCATATATATATATATATATATATATATATATATATATATAGCTTATTCTTCACAAACAAGGAAGATGCTAAGCTCATGTAAAGTTGTTAAACTATTTCACTGG	GCTGTCTTCTGGTGAGTGAAGTCAGTGCTTCAGCTTCCCGATATCCGACGGTAGTGTNNNNNNNNCGAAGAGTTTTATATAAA	24764420	24764458	+	0	21937_0429
1:24773079-24773258/16,29/-	0.751024	1	24773243	24773258	1	CTCTATGATTTCCCTT	24773079	24773107	1	ATCTACTTAATCACACCTTTTATTTAGGG	24773108	24773242	ACATCTATATCATCATCATCATCATCATCATCATCATCATCATCATCATCATGATGTATATATTTCTTAATATTTAGCCGTAATAGAGTTTAACATTCTAATGGAAAACAAAAAAAAAAACTTAACAAAAACGAA	ATCTACTTAATCACACCTTTTATTTAGGGCTTCAGCTTCCCGATATCCGACGGTAGTGTNNNNNNNNCTCTATGATTTCCCTT	24773191	24773241	-	0	21956_0430
1:24849688-24849867/18,27/+	0.870085	1	24849688	24849705	1	CATTAGAAGGATATGATC	24849841	24849867	1	GAGTTTGGAAGCTCACTTTCTGAATCC	24849706	24849840	ATTCCTCCTCTTAGTCTTCATTGTCTTCTTCTTCTTCTTCTTCTTCTTCTAGGCTGCGGATACAAATATAAGTACCCTTATACAAACCCATCGGACACAAGATATATTCAGGAATAAACATGAAGTCCTTCTCCG	GAGTTTGGAAGCTCACTTTCTGAATCCCTTCAGCTTCCCGATATCCGACGGTAGTGTNNNNNNNNCATTAGAAGGATATGATC	24849729	24849755	+	0	22010_0431
1:25096457-25096636/20,25/+	0.971571	1	25096457	25096476	2	GTTTTTAGGTTTGATGACCT	25096612	25096636	1	GTTCTCTGGTGATTTTGGTCGGATT	25096477	25096611	GCAATTGAAGATTGAAAGCTTGTCGATTGAAGAAGAAGAAGAAGAAGATTCAAAGAGTCATATTCTCATCAAAGCTAAAATTGGAATCTCGCCATGATTTCTTTGGGCGAAGTTTGAGACTTGTCGATAGATCAA	GTTCTCTGGTGATTTTGGTCGGATTCTTCAGCTTCCCGATATCCGACGGTAGTGTNNNNNNNNGTTTTTAGGTTTGATGACCT	25096505	25096524	+	0	22200_0434
1:25101573-25101752/17,25/+	0.981278	1	25101573	25101589	1	GATTTGTGGAAGCAGGG	25101728	25101752	1	GCAGTAGAGGTAACTTTTTCAGGCG	25101590	25101727	AAAGACTGGAAAGTGTCCCAATCATCATCATCATCATCTTCTTCTTCTTCTTCTTCTTCGTCAGTTCCACTTTCTACTGTGCTAACCTGATTGAAAGATGTTGGCATAGTAGACAACGCTTCTTCTTTAACCATATTA	GCAGTAGAGGTAACTTTTTCAGGCGCTTCAGCTTCCCGATATCCGACGGTAGTGTNNNNNNNNGATTTGTGGAAGCAGGG	25101626	25101648	+	0	22212_0435
1:25386557-25386736/18,27/-	0.914539	1	25386719	25386736	1	AGTCTAAAATTGAAGACT	25386557	25386583	1	TTATGTGCCATAAGTACCTGTAACTTG	25386584	25386718	TCAACGCAAATAAGAACAAAAATTTGTGATTGAACATCAAAAAACAAGTTAAAGAACACATCAAGAACAAGAATTTCCACACACACACACAGACACACACAAATAAACACTCATTGAAGCATTTAAACAAACAGA	TTATGTGCCATAAGTACCTGTAACTTGCTTCAGCTTCCCGATATCCGACGGTAGTGTNNNNNNNNAGTCTAAAATTGAAGACT	25386618	25386641	-	0	22421_0436
1:25434957-25435136/20,25/+	0.961881	1	25434957	25434976	1	TTGTCGGTTTCTTGGTTGCT	25435112	25435136	1	CTTCCTTCTGTTAAGGTTTTCACTG	25434977	25435111	GAGTTACCAGTAGAAGCCGAGGAGGAGGAGGAGGAGGAGGAAGAGGAAAAACCGCATGGTGTAAATCAGTTTCTTTCCCCTGAGGAAGCTTATGCTTTGCCTGCTTCAGCTAATACAAAATCACCTAGAGTTAAA	CTTCCTTCTGTTAAGGTTTTCACTGCTTCAGCTTCCCGATATCCGACGGTAGTGTNNNNNNNNTTGTCGGTTTCTTGGTTGCT	25434995	25435023	+	0	22458_0437
1:25497595-25497774/16,29/+	0.973072	1	25497595	25497610	1	GGAATCATGTCAAACA	25497746	25497774	1	GCAAAGGTTGGAACTTTTCTTGGGATGAG	25497611	25497745	TCGATAATGACTCTAAAGACACTGATCTGTCTCCTAAAGATCGTATCATCATTGTAGCCAATGAATTACCTATACGAGCTCAGAGAAGGGTTGATGGTAATGGTAGTGGTAGTAGTAGTAGTAGTACTTGTTGTA	GCAAAGGTTGGAACTTTTCTTGGGATGAGCTTCAGCTTCCCGATATCCGACGGTAGTGTNNNNNNNNGGAATCATGTCAAACA	25497713	25497736	+	0	22486_0438
1:25501113-25501292/16,29/+	0.980278	1	25501113	25501128	1	AAGATCAAGAAACCAC	25501264	25501292	1	CAAAGAAGCTAGGCATCTGAAAGCTACCA	25501129	25501263	ATTGAAAAGGAAATGAAAGATTAGTACCTCATCTAAGATACATTGGAGTACATATTCACAGCTCTCAGAGGAATCAAACTCGATCATTGAGGTAGTAGTAGTAGTAGTAGTAACAGAAACAACATGAGAATCAAA	CAAAGAAGCTAGGCATCTGAAAGCTACCACTTCAGCTTCCCGATATCCGACGGTAGTGTNNNNNNNNAAGATCAAGAAACCAC	25501220	25501240	+	0	22488_0439
1:25552170-25552349/16,29/-	0.895717	1	25552334	25552349	3	GAAATTTATCACAAAA	25552170	25552198	1	GTAACATCAGCCTGCATGTAAACTCTGGC	25552199	25552333	AAGTTAACATATATATAACCTTAGGACACAAGAGGACATCCAAAAAAACGAAAAATGATTTTTCGTTTTGTGTGTGTGTGTGTGTGTGTGTGTGTGTGACTATTACGTACCCGAGTAACCCTGAGAGTAATGCTA	GTAACATCAGCCTGCATGTAAACTCTGGCCTTCAGCTTCCCGATATCCGACGGTAGTGTNNNNNNNNGAAATTTATCACAAAA	25552236	25552265	-	0	22524_0440
1:25622073-25622252/16,29/-	0.973581	1	25622237	25622252	1	GAAGTGGCGGTGGTGT	25622073	25622101	1	TGCTCAGCTTCAAGCTACACGAAACGCAG	25622102	25622236	ACGAAGCCGAGGCGGAGGAGGAGGAGGAGGAGAACGTAAGTATGAGTGTCAGTATTGTTGTAGAGAGTTTGGTAACTCACAAGCCTTAGGTGGTCACCAAAACGCTCACAAGAAAGAGCGTCAACAGCTTAAACG	TGCTCAGCTTCAAGCTACACGAAACGCAGCTTCAGCTTCCCGATATCCGACGGTAGTGTNNNNNNNNGAAGTGGCGGTGGTGT	25622205	25622228	-	0	22582_0441
1:25638045-25638224/17,27/-	0.940785	1	25638208	25638224	1	AGATAAAGTCACTCCGG	25638045	25638071	1	CGTGGAGGTTTCAAGGATGTCTTGTGA	25638072	25638207	TAGTTATAAAAAAAAACAAATTAGGTTTAACTTGTAGTGCTATATATATATATATATATAAGCTTCATATTGTTTTCATTACGATCTTTTTTTTTATATATACAATGAAATTGTTGCAAGCGTTAAGCAATGTAAA	CGTGGAGGTTTCAAGGATGTCTTGTGACTTCAGCTTCCCGATATCCGACGGTAGTGTNNNNNNNNAGATAAAGTCACTCCGG	25638148	25638167	-	0	22593_0442
1:25684399-25684578/16,29/+	0.982331	1	25684399	25684414	1	ACATGTAGGATCTTGG	25684550	25684578	1	GAGTGATGATCTTGAAACCGATTGATGGG	25684415	25684549	CGTTTAGACAATTCTAGATCTCTACTTTTAGATAGAACCAACAAAGTTACAAAACAAGAGGACAAGAAAATACCCAAAAAAAAACAAAAAAAGAAAAGAAAAGAAAAGCGTAGAGAATCTATTAAAACTCAGAGC	GAGTGATGATCTTGAAACCGATTGATGGGCTTCAGCTTCCCGATATCCGACGGTAGTGTNNNNNNNNACATGTAGGATCTTGG	25684490	25684522	+	0	22629_0443
1:25771766-25771945/18,25/-	0.96442	1	25771928	25771945	1	AACTTACACTACACGACG	25771766	25771790	1	GCTTGAGGGAGAGACTTGAAGGAGG	25771791	25771927	TTTGATACGGTAAAAAGTTCACCAAACCCAAATTTTTAAAATAGAAAAAAGTTTCCGTTTTTTTAGCTCAGACTTTCTATGTATGTATGTATACTCTGTTTTTTAGGTTATGGATTGTGGTGGTGGTGGTGGTGGTG	GCTTGAGGGAGAGACTTGAAGGAGGCTTCAGCTTCCCGATATCCGACGGTAGTGTNNNNNNNNAACTTACACTACACGACG	25771790	25771811	-	10	22708_0445_SNP_a
1:25782121-25782300/16,28/-	0.981593	1	25782285	25782300	1	ACAGCGAGAAAGAAGC	25782121	25782148	1	GAAAGAAGTGGAAGAGAATCGAGGTCGG	25782149	25782284	TTAATCTCAATGGAGAAAGAATATTGGATCTTTAAAATAGAATCAAAACATAGAGAAATTGATTCCAATGTTTTGTTGATTTTTCAAGAGATAGAGAGAGAGAGAGAGAGAGAGAGGGTTTAGGTTTTTGGAACAA	GAAAGAAGTGGAAGAGAATCGAGGTCGGCTTCAGCTTCCCGATATCCGACGGTAGTGTNNNNNNNNACAGCGAGAAAGAAGC	25782169	25782198	-	0	22713_0446
1:25823808-25823987/16,28/+	0.97515	1	25823808	25823823	1	GGTCTAGTGCCATGGC	25823960	25823987	1	GGAAACTGACCATTACAGAGCCTGGTGG	25823824	25823959	ACCAAAAATGTATATATATATATATATATATATATATATATATATATATATATTTTTAACCCCGTATTGACATTAGTAACAAAACAAATAATACAATCATTAAATATGTTTTTAAATGATCAATAAATAATAGTTT	GGAAACTGACCATTACAGAGCCTGGTGGCTTCAGCTTCCCGATATCCGACGGTAGTGTNNNNNNNNGGTCTAGTGCCATGGC	25823834	25823876	+	0	22751_0447
1:25851867-25852046/18,27/+	0.974827	1	25851867	25851884	1	GTCTCCTTAGGGCTGAGG	25852020	25852046	1	GCTTGAGGCACCTACATATGTAGTTGA	25851885	25852019	TTCACAAATACACTCATATATCTATTAGTGGATATAGGAATGATCAAATATATATATATATATATATATACACTTCCAGTTTCCAAATTCATGTTAACCTAGTGTAATTAAAGTTCTTGTTTTTTAAAATGAACC	GCTTGAGGCACCTACATATGTAGTTGACTTCAGCTTCCCGATATCCGACGGTAGTGTNNNNNNNNGTCTCCTTAGGGCTGAGG	25851932	25851954	+	0	22772_0060
1:25861227-25861406/18,27/+	0.981426	1	25861227	25861244	1	AGAGAGAAGAGGACAAAG	25861380	25861406	1	TTCACCAACTCATCTCTCATCATCACC	25861245	25861379	AGTTGAAAGATGAAGACTCTCATGTCTTCATAGAAACAAGTGATATGTGCGCTAAGAAAGAAGAAGAAGAAGAAGAAGAAGAAGACAGTTCTGAAGCCATGAACAACATACAAAATTACCAAAATGACCTCTTCT	TTCACCAACTCATCTCTCATCATCACCCTTCAGCTTCCCGATATCCGACGGTAGTGTNNNNNNNNAGAGAGAAGAGGACAAAG	25861298	25861329	+	0	22786_0448
1:25948755-25948934/18,26/-	0.980714	1	25948917	25948934	1	GATCAGGATCTGGTGGTG	25948755	25948780	1	GCTTTATCTTTGTTTTGGAATTGAGG	25948781	25948916	GTGGTTCTGAGATTTCTGAATCTGAGCTTGTTAGTTTTGGTATTACTGATGATTTGAGAGAGTTTGTTAAAGGTTTGACATCTGCTACGTTCCAGGCTTTTCCTGAACAAGGTATTGTTGTTTTGTTGTTGTTGTT	GCTTTATCTTTGTTTTGGAATTGAGGCTTCAGCTTCCCGATATCCGACGGTAGTGTNNNNNNNNGATCAGGATCTGGTGGTG	25948780	25948802	-	0	22829_0449
1:25956951-25957130/16,28/-	0.820055	1	25957115	25957130	1	AGAGATTCATGACCCG	25956951	25956978	1	CAGGAAAAAAGATAACTGCAAATGGGTG	25956979	25957114	TATTGATTCTATGGAATATTATTAAGATATATACAATGTGCCATAAAATCTCTGAAGAATATATATTTATTTCCTAACTTTTGCTCCAAAAGGAATATATATATATATATTATATATGTCTATTTCCATTTCAAAT	CAGGAAAAAAGATAACTGCAAATGGGTGCTTCAGCTTCCCGATATCCGACGGTAGTGTNNNNNNNNAGAGATTCATGACCCG	25956998	25957020	-	0	22837_0061
1:26020527-26020706/21,23/+	0.980869	1	26020527	26020547	1	GAGCTTGTTGTCAGTCTTTGG	26020684	26020706	1	GCCCTTTTTGGATTGGGGATCAG	26020548	26020683	TATACGCTTGGAGGAAGAGGCATCTGCATCCATTTCATACTCCCACAGATTAATAAAACATTATGATTCACATTATATAGAGTTCAGAGAGAGAGAGAGAGAGAGAAAGAGTTTCGACCTCGTTTTGTCCACGTCG	GCCCTTTTTGGATTGGGGATCAGCTTCAGCTTCCCGATATCCGACGGTAGTGTNNNNNNNNGAGCTTGTTGTCAGTCTTTGG	26020633	26020658	+	0	22912_0450
1:26029400-26029579/18,27/+	0.970605	1	26029400	26029417	1	CATGTGTAGCAAGTGCTG	26029553	26029579	1	GTTCTGACCGGTTTGAATGGTTCCATG	26029418	26029552	TTCTAACACACACACACACACACACACACAAAATTGTAAAAACATTTAACAAAAATGTCATTTTATATTTTCATTCAATCTTTTTGGTTATTTACTTAAATTGCTCAAATGAATCTATAGGAACAAGCAGGTTCA	GTTCTGACCGGTTTGAATGGTTCCATGCTTCAGCTTCCCGATATCCGACGGTAGTGTNNNNNNNNCATGTGTAGCAAGTGCTG	26029423	26029447	+	0	22913_0451
1:26057902-26058081/21,23/+	0.98039	1	26057902	26057922	1	TCGTTCATGATGATTGATCGG	26058059	26058081	1	CCGTTAAAGTGCAGTGTCTCGTC	26057923	26058058	CGAGAGAAGTAGTGATAAGAGAAGATAGAGAAAGAGAGGTAGAGAGAGAAAAAGAGAGGAGCTAGGGTTTGTTCTTGATTGGAAGAGAAAGAAAGAAAGAAAGAAAGAAAAGAGAGTGAAAAAAAAACTTTGAAAC	CCGTTAAAGTGCAGTGTCTCGTCCTTCAGCTTCCCGATATCCGACGGTAGTGTNNNNNNNNTCGTTCATGATGATTGATCGG	26058004	26058032	+	0	22943_0452
1:26096565-26096744/21,24/+	0.977491	1	26096565	26096585	1	TGGGTTCTCTTCTGCTGTTGG	26096721	26096744	1	CCACAAATCAAGATGAGAAGCATG	26096586	26096720	TCTGATGGGTCAACAGAGAGGACAACAACAACAACAACAACTATCAATGATGATGATGCCATTGTCAAGGTCTACAAGTGATGGCTATGATGCATCTGGTGGAGAAGACAGTGATCAGGTTCCTTCTAGAAACAT	CCACAAATCAAGATGAGAAGCATGCTTCAGCTTCCCGATATCCGACGGTAGTGTNNNNNNNNTGGGTTCTCTTCTGCTGTTGG	26096607	26096626	+	0	22972_0453
1:26124837-26125016/16,26/+	0.980165	1	26124837	26124852	1	AGAAGAAGGAAAGCAG	26124991	26125016	1	GGTGAAGCACGATATACTCTCGAGGT	26124853	26124990	AGTTATTAGAGGCACAAATATCTCCTACCAACAACAACAACAACAACAACAACAAGGTGATAAACTTGTTATACAACTCAAAAATGTAAATATATGCACTTGTCACATTAGTAACATTTTTATTCTCATATGTAACTA	GGTGAAGCACGATATACTCTCGAGGTCTTCAGCTTCCCGATATCCGACGGTAGTGTNNNNNNNNAGAAGAAGGAAAGCAG	26124881	26124907	+	0	22993_0454
1:26204579-26204758/22,18/+	0.974214	1	26204579	26204600	1	TTGGAGGTTAGGGTTTGTGATG	26204741	26204758	1	GGGCCTGGGCTTTTGTTA	26204601	26204740	AAGAATTTGAAGGTTGAAGTCTTGAAGACGATGATGATGATGATTGATGATGATAGCGGAAGAAAAAAAATTAAATCTTATTATTATCCCAGTGGTTTTGATTATCTCTATTTGTTTAAAATGGGCTAGATAAAACAGAT	GGGCCTGGGCTTTTGTTACTTCAGCTTCCCGATATCCGACGGTAGTGTNNNNNNNNTTGGAGGTTAGGGTTTGTGATG	26204630	26204654	+	0	23052_0455
1:26216301-26216480/16,28/+	0.982336	1	26216301	26216316	15	CCTCTCTATCTCTCTC	26216453	26216480	1	ATCCGGATCCGGATCATAACCATCGACC	26216317	26216452	TAAGTATCAGCAAAAAAACAGAGATTTATAGAGAGAGAAAAAAACTATGGCTCACATAAAGATCTAACAGAGACAGTAGTATAGTCCCACTTCCCCACCACCAAAGCTTCGATCATCATCATCATCATCATCATGG	ATCCGGATCCGGATCATAACCATCGACCCTTCAGCTTCCCGATATCCGACGGTAGTGTNNNNNNNNCCTCTCTATCTCTCTC	26216428	26216450	+	0	23063_0456
1:26357560-26357739/18,27/-	0.965626	1	26357722	26357739	1	GTATCGGGGCTCTTATGT	26357560	26357586	1	CAATTCCATCCTCTATTCTCGCCAGAG	26357587	26357721	AAATTATCACATCTCTTCTGCGAGTTATTTTTGTTTCTACGAAGAAAAAAGAAGAAGAAGAAGAAACAACAAAAATGGCTTCTCAGAGTTCTTCACTTTTTCTGGTTATCTTCTTCATCTTCATCTACGCTTCTT	CAATTCCATCCTCTATTCTCGCCAGAGCTTCAGCTTCCCGATATCCGACGGTAGTGTNNNNNNNNGTATCGGGGCTCTTATGT	26357657	26357681	-	0	23163_0457
1:26364635-26364814/16,25/+	0.822017	1	26364635	26364650	1	TCTTCTTCCCGAGCCA	26364790	26364814	1	CATTTGACCTTTATTACTTCTCTGT	26364651	26364789	GAGAAAGAGAGAGAGAGAGAGAGAGATTTTGGAATGAAAAAGGTAAAGAGAAGAAGAAAAGAGAGGTTTAGGTTTGTTATAAATGGGAATGATTCTGCTTCTTTTTTTTATGTCTGTTTTTGAGAGCTCACCACAAAAA	CATTTGACCTTTATTACTTCTCTGTCTTCAGCTTCCCGATATCCGACGGTAGTGTNNNNNNNNTCTTCTTCCCGAGCCA	26364650	26364676	+	0	23169_0458
1:26395051-26395230/18,26/+	0.753216	1	26395051	26395068	1	CGATAAGATTTATTAGCA	26395205	26395230	1	GGGTCAGTTTTGGTCTTGACCTCAGC	26395069	26395204	TTTTATTTTTATAATTTGCATTTAAAATATACATATATATATATATATATATATATATATATATATATATATAGGACTTCTGTTACCTTATAGGTAGCAATATCATCTCTGAGACGAGATTTCACAAAAAGAGCAT	GGGTCAGTTTTGGTCTTGACCTCAGCCTTCAGCTTCCCGATATCCGACGGTAGTGTNNNNNNNNCGATAAGATTTATTAGCA	26395095	26395141	+	0	23191_0459
1:26448301-26448480/16,29/+	0.772827	1	26448301	26448316	1	CACAAAGTATATACAA	26448452	26448480	1	GAGGAAAATGAAGTGATCCAGCTGGCATA	26448317	26448451	TACTATTCTTATCCACTGGTAGACCTTTTGTTACTTAATAAGATGTTTATGCTAGATTTATTTTTATTTTACTTTTATTTTATTTTATTTTATTTTTATGTCTTTTTGTTAACTGCTTATGATGCTAGATATTAA	GAGGAAAATGAAGTGATCCAGCTGGCATACTTCAGCTTCCCGATATCCGACGGTAGTGTNNNNNNNNCACAAAGTATATACAA	26448373	26448412	+	0	23231_0460
1:26491206-26491385/20,24/+	0.980345	1	26491206	26491225	2	CCGATAACCTATTACGGTAA	26491362	26491385	1	TGTCCCTCACCCTTCATATCCAAG	26491226	26491361	TAAAACATGTGAGTTCGTCTTAAGCAATTCAAGGAAATAATTGAGACCAAGGAAAAGAAAAGATCTATGTTGTGTAGACTACTACATATAAAAAGAAAGTCTTAGGAACGCAAAGAAAGAAAGAAAGAAAGAAAGG	TGTCCCTCACCCTTCATATCCAAGCTTCAGCTTCCCGATATCCGACGGTAGTGTNNNNNNNNCCGATAACCTATTACGGTAA	26491337	26491360	+	0	23266_0461
1:26538340-26538519/25,20/-	0.98143	1	26538495	26538519	1	CTTCTAGCATAGTTTTAGTGTTTTC	26538340	26538359	1	CCCATAACAGAAACCCCCAC	26538360	26538494	TCATAATGTCAATAAATATTTACAGGTCTTATTATGATTTTTACTAAATAAACAGCAGAAACAAATAAAAAGAAAAAACATGGAAGAAGAAGAAGAAGAAGAAGTCCAGCTTCACTCACCTTTCGCTTTCTCTAT	CCCATAACAGAAACCCCCACCTTCAGCTTCCCGATATCCGACGGTAGTGTNNNNNNNNCTTCTAGCATAGTTTTAGTGTTTTC	26538391	26538412	-	0	23312_0462
1:26570384-26570563/16,29/-	0.964289	1	26570548	26570563	6	TCAAGAAAAGAAAAAG	26570384	26570412	1	GCAAGAGACAGATTCTTTACTTAACGAGA	26570413	26570547	TAGAGGCGAGAAACTCATGATGAGACATCACGGGTTTTGATTTTGTTTTTTGGTTAGCAATAACAATGGACAACGAGAGAGAGAGAGAGAGAGAGAGATAAAACTTGAAACATAAAGAGAGGTATAGCATTCAAA	GCAAGAGACAGATTCTTTACTTAACGAGACTTCAGCTTCCCGATATCCGACGGTAGTGTNNNNNNNNTCAAGAAAAGAAAAAG	26570450	26570473	-	0	23348_0463
1:26631149-26631328/23,22/+	0.972514	1	26631149	26631171	1	GTCTTAATTGTTTGGCGAATTGC	26631307	26631328	1	TTCCTCCCGCCGGCTTTCCGCT	26631172	26631306	ACTAAAAATAAGAACCCTAAAAAGTCTTACTTTAGTGTGGGACAAGAAGAGATGTTAAAATCTGAAAACAATTTCTTGAAGATGACGAAAAGTGTTCACATGTCTTCTTCTTCTTCTTCTTCTTCTTCTTCACCA	TTCCTCCCGCCGGCTTTCCGCTCTTCAGCTTCCCGATATCCGACGGTAGTGTNNNNNNNNGTCTTAATTGTTTGGCGAATTGC	26631274	26631302	+	0	23383_0464
1:26631725-26631904/16,29/-	0.982439	1	26631889	26631904	14	AAGAAGAAGACGAGAA	26631725	26631753	1	GCTTGGCTATTTTCTTCCAAGGAGGAGAC	26631754	26631888	CCAAATTTGTCGGTGAATGAAGAAGAATCAGAAGAGTGGTTGTTGTTGTTGTTGTTGTTGTTGTTGTTGTGTTGAGTGAATAAAACAACAGTGATTTGGGAAGACAAAGCGAGCCATGAACGAAGAGCAAGTAAA	GCTTGGCTATTTTCTTCCAAGGAGGAGACCTTCAGCTTCCCGATATCCGACGGTAGTGTNNNNNNNNAAGAAGAAGACGAGAA	26631815	26631850	-	0	23384_0465
1:26645115-26645294/16,29/+	0.928472	1	26645115	26645130	3	TTCTTGTGTCTTCTCT	26645266	26645294	1	GTCGCTTCTGTGTTCATAAACATAGGTCT	26645131	26645265	ATGTGTGTGTGTGTGTGTGTGTGGATGTTATGGTCTTATCAAGATCTTTTGATATGTTTACTAATTTTTATTGTCGAATTTTAAAAAAATTAAACAGGATTTAGAGCAATTGGGTGTGGATATTTGTTGTCAGCA	GTCGCTTCTGTGTTCATAAACATAGGTCTCTTCAGCTTCCCGATATCCGACGGTAGTGTNNNNNNNNTTCTTGTGTCTTCTCT	26645132	26645153	+	0	23387_0466
1:26718239-26718418/17,28/+	0.95275	1	26718239	26718255	1	ATTGCACTTTCAAAGAC	26718391	26718418	1	GGTGAGCCACCTCCTCGTTGATTTTCTC	26718256	26718390	TGAACTATAAAGAGCACACACACACACACACACACACATGTATAGATACATGAGGACTCTTCCTCTATTCCTCTGAAAAGAGATGTTCATCGATCTCTTTGGAAACTTTGATTGCAAACTGGAGGAGAGTTTCAG	GGTGAGCCACCTCCTCGTTGATTTTCTCCTTCAGCTTCCCGATATCCGACGGTAGTGTNNNNNNNNATTGCACTTTCAAAGAC	26718270	26718293	+	0	23434_0468
1:26767127-26767306/18,27/+	0.758574	1	26767127	26767144	1	GCTCCTAGCCAGAATTTT	26767280	26767306	1	CCTATAATTCATGCTTTATGCAAACAC	26767145	26767279	ATATAAATGTCTCTTTTAGATTCTTGCAATTGTAACTTATATTTAAAGAATATTGGTTTTTTAGAAAATCATCGCCACTCGAGAATCAACCGAAATCAAGTGAAAGGGTGGACATATATATATATATATATATTT	CCTATAATTCATGCTTTATGCAAACACCTTCAGCTTCCCGATATCCGACGGTAGTGTNNNNNNNNGCTCCTAGCCAGAATTTT	26767258	26767277	+	0	23472_0062
1:26863524-26863703/17,28/+	0.977941	1	26863524	26863540	1	CCAATGGGCCTTTATTG	26863676	26863703	1	CGAGGATTCTGATTTCGTTTTCTAGTTG	26863541	26863675	TTGATTGGGAAATTAAAAATCAGATTAGAGAAGACGAACGAATCTGAGAAAGGTGAAGCTGAAGAAGAAGAAGAAGAAGAAGAAGAAGAAGAAGAAGAAGAAGAAGACTCTCTAATGGCGGACTCAAACTGATTT	CGAGGATTCTGATTTCGTTTTCTAGTTGCTTCAGCTTCCCGATATCCGACGGTAGTGTNNNNNNNNCCAATGGGCCTTTATTG	26863601	26863647	+	0	23529_0470
1:27022329-27022508/17,25/-	0.980341	1	27022492	27022508	1	CGGATTCACCAAGGAAA	27022329	27022353	1	GCGGAGATGAATGGAGGTGTGACGT	27022354	27022491	ATCTCTCCTTCATCCTCTTCTTCCATCGCTAGATTATTCATCTCTGTATTATTAGTATTATTACTCATCTTCTTCTTCTTCTTCTTCTCTCTCTCACCACAGTTTTTTCCAGCCGCGACTAAGAACAGGAAGAGGACG	GCGGAGATGAATGGAGGTGTGACGTCTTCAGCTTCCCGATATCCGACGGTAGTGTNNNNNNNNCGGATTCACCAAGGAAA	27022400	27022424	-	0	23610_0471
1:27085256-27085435/18,25/-	0.940009	1	27085418	27085435	1	GGTACGAGTGTTTTGACG	27085256	27085280	1	ACTAGGGACATGCATCACATACATG	27085281	27085417	TTTTAGGCATATACATGATTAAAAAGTGTGGACCAAACTTATGTTCGTTTGGTCATTCAGTGTACTGATGATAAATATTCATTCTTTCATGGTCCTTATATACATATATATATATATATATATATATATATATATAT	ACTAGGGACATGCATCACATACATGCTTCAGCTTCCCGATATCCGACGGTAGTGTNNNNNNNNGGTACGAGTGTTTTGACG	27085280	27085321	-	0	23654_0472
1:27128757-27128936/18,25/+	0.980101	1	27128757	27128774	1	GTCTCTAACCTGGCACTT	27128912	27128936	1	CGGTATCAGGGTTCTTCTGGTTGTT	27128775	27128911	TGTTTATCTCGGTCAGAGACTCGGCGCCGCTTGTTGATCAATGCTTTTGTTGTCTTTTACGTCTCTTTTGGTCCCAAACCCTAACTTAGCTTTTTTGTTGTTGTTCTTGTTGTTGTTGTTTACTGACTTACCAGTCA	CGGTATCAGGGTTCTTCTGGTTGTTCTTCAGCTTCCCGATATCCGACGGTAGTGTNNNNNNNNGTCTCTAACCTGGCACTT	27128869	27128894	+	0	23682_0473
1:27226461-27226640/16,27/-	0.971842	1	27226625	27226640	1	GGTGGAGCAATGGATG	27226461	27226487	1	GCTGTGAGAATGATCTTACTTGTGACC	27226488	27226624	ATTGGTCTTCTTCTTGCTCTTGCTCTTGCTGTTGTTGTTGCTGTTGCTGTTGGAGCTGATCTATTCTCCACCAGTAGAGTTTGGCGTATAGATGGAGGATAAGGACGAACAGAACCGCCATGAATAGAACAATGATT	GCTGTGAGAATGATCTTACTTGTGACCCTTCAGCTTCCCGATATCCGACGGTAGTGTNNNNNNNNGGTGGAGCAATGGATG	27226573	27226611	-	0	23742_0474
1:27256960-27257139/26,19/-	0.979209	1	27257114	27257139	1	GCGGCTGTATCTTTTTTTTCTTTCCT	27256960	27256978	1	GTGTGCGTGTGCTGGTTTC	27256979	27257113	AATCGAAGACGACATTCGTCGGAAAAGAAGTTGTCTGAATAAGGAAACTCTCTCTCTCTCTAAACAGTCTCCGCATATTTTCTCTCTCTAAAGACTCTGTCTTTTTTACTACGGAGAGAGAGAGAGAGAGAGAGA	GTGTGCGTGTGCTGGTTTCCTTCAGCTTCCCGATATCCGACGGTAGTGTNNNNNNNNGCGGCTGTATCTTTTTTTTCTTTCCT	27256978	27257000	-	10	23762_0475_SNP_a
1:27258421-27258600/22,23/+	0.841275	1	27258421	27258442	1	CAATATTATATTTTGTCAAAGG	27258578	27258600	1	CCTACTCGGCTACTCCTACTTCC	27258443	27258577	AAATATATATATATATATATATATATTAAAAAAAGGAAGAAAAGTCTCGAAGTCGCAGGTCTGCGAAAATAGTGGTGATTTGGACTTCACGAACTAAAAAATATGACAACTTGTGACTAGCTTTGTCTCTTTGGT	CCTACTCGGCTACTCCTACTTCCCTTCAGCTTCCCGATATCCGACGGTAGTGTNNNNNNNNCAATATTATATTTTGTCAAAGG	27258445	27258468	+	0	23764_0476
1:27281899-27282078/22,23/-	0.978248	1	27282057	27282078	1	GTGATGGGTCTTTTGTTGTCTG	27281899	27281921	1	CGTACGACGTATACACAAACACG	27281922	27282056	CTAACTTAATTCTGGCCATAATTTAATTAATTCTATGATAGAAAATAATAATAATAATAATAATTTCACGATTCGTTAATCTACAGCTGTGTTTAGCTGTCATACAATTCAATTTATCATTTTTCTTCTTCATCA	CGTACGACGTATACACAAACACGCTTCAGCTTCCCGATATCCGACGGTAGTGTNNNNNNNNGTGATGGGTCTTTTGTTGTCTG	27281993	27282013	-	0	23787_0477
1:27353258-27353437/19,26/-	0.972429	1	27353419	27353437	1	TGCGTAGGAATATGCATCG	27353258	27353283	1	GGTACCACGCTGTTTGAGGGACTCTG	27353284	27353418	ACCCATGTTTCTTGAGACTTCCCTGGAAACACGACAGTATACTCATAAGCTCTCGTTATTACAACTTGAGCAAAAGAAACTCCAGTTGGAAGCTAAAGGGATAGAGAGAGAGAGAGAGAGAGAGAGAGAGAGGGA	GGTACCACGCTGTTTGAGGGACTCTGCTTCAGCTTCCCGATATCCGACGGTAGTGTNNNNNNNNTGCGTAGGAATATGCATCG	27353283	27353316	-	0	23825_0478
1:27496762-27496941/16,28/+	0.879921	1	27496762	27496777	1	GTAGCATTGAACGAGG	27496914	27496941	1	ACTTTTCTCCCAAAGATAGGATTTTGAA	27496778	27496913	AAGAAGAAGAAGAAGAAGATTGTAAAGGTGGAAACTTGAAACGCAGAGATATGTTTGCAAGCGCCATTAACCCACCAAATCACTTCACAATTAAAGCTTCTACCTTTTTCCCTCAATTTAATAAAAAAAGATTTAT	ACTTTTCTCCCAAAGATAGGATTTTGAACTTCAGCTTCCCGATATCCGACGGTAGTGTNNNNNNNNGTAGCATTGAACGAGG	27496777	27496796	+	0	23901_0479
1:27554319-27554498/21,24/+	0.708177	1	27554319	27554339	1	CCTTTTGTTATAATAAAAGAC	27554475	27554498	4	AAAACTCTTGATGCTTGCCTAGCC	27554340	27554474	TGAGAAAAGGTCTTGGGGATTGATATCATAAAATCATATATATATATATATATATACCTTTTGAGATTTCTTGAACGGTAGCCGGAACAACCATACCAGAGTAAGAATCTCCTCCAACATAGAAAGGATTGGAGG	AAAACTCTTGATGCTTGCCTAGCCCTTCAGCTTCCCGATATCCGACGGTAGTGTNNNNNNNNCCTTTTGTTATAATAAAAGAC	27554375	27554395	+	0	23932_0480
1:27557130-27557309/16,29/-	0.956244	1	27557294	27557309	1	CCATTGTGCGTAACTG	27557130	27557158	1	CGTACTGGGTCAATGACGTGAATGTACGC	27557159	27557293	AAACTCCAAATTGCTATGTAAGTAATCCAAGTATCTTGCCCTCTCTTAACCGTTAAACCATTTGAGAAAATATATATATATATATATATATGTATACAAGGTTGCTTTTGCAGATTTATCGATATTTGCTAACTA	CGTACTGGGTCAATGACGTGAATGTACGCCTTCAGCTTCCCGATATCCGACGGTAGTGTNNNNNNNNCCATTGTGCGTAACTG	27557198	27557224	-	0	23936_0481
1:27561530-27561709/16,29/-	0.969016	1	27561694	27561709	8	TGGAGGACCTGGCTGC	27561530	27561558	2	GCAGGGCCTCTAACTATGAAGCTTGACGT	27561559	27561693	TCTTCCATCTCTGGCCTTCTTTTTGAGAATGGTGAAATCGAAAACATTGATAAACTCCTTCTTATGCGTCTCTGATTAGTCAATTATATATATATATATATATATATATATATATATATATATATATGTGTATAA	GCAGGGCCTCTAACTATGAAGCTTGACGTCTTCAGCTTCCCGATATCCGACGGTAGTGTNNNNNNNNTGGAGGACCTGGCTGC	27561567	27561609	-	10	23937_0482_SNP_a
1:27597951-27598130/18,27/-	0.977154	1	27598113	27598130	1	AGTAAGAGACGAGTCTTC	27597951	27597977	1	GGGCTTTTCTTTTGTTGAGGCCTTTTC	27597978	27598112	GCATCATTCAGTAATCAATCACTCGGAAATAAATTCGTTGAGAGGTTTAAAGCGAAGGAGACTGAGAGGAACTAGAGGAAGGGGACGACATAGAGAAGAGAGAGAGAGAGAGAGAGAAATTGGAAGATTTTAAAT	GGGCTTTTCTTTTGTTGAGGCCTTTTCCTTCAGCTTCCCGATATCCGACGGTAGTGTNNNNNNNNAGTAAGAGACGAGTCTTC	27597996	27598021	-	0	23961_0483
1:27674582-27674761/19,26/+	0.917023	1	27674582	27674600	1	GGCTAGATTCATTGGCAAA	27674736	27674761	2	GCGATGTGTGCGTTCATTGTCGAGAA	27674601	27674735	TATATCATATATATATATATATATATATATCTTAGTTCAGTATATTGATATCTCCTAAATCTTAATATATATATTTTTTGTTAATTTTGTCTGATATAGTTGAGCAGAATATGGGATGTAATGATTATATTGTTG	GCGATGTGTGCGTTCATTGTCGAGAACTTCAGCTTCCCGATATCCGACGGTAGTGTNNNNNNNNGGCTAGATTCATTGGCAAA	27674600	27674630	+	0	24006_0484
1:27708355-27708534/16,29/+	0.981421	1	27708355	27708370	1	AACACTTAAAGAGTGA	27708506	27708534	3	GTGTGTGTGTGTGTGTGTGTGTGTGTGTA	27708371	27708505	ATAGAAATATCACTTTTACTCTCTCTCTCTATATATATATATATATATATAAATTAAAATGTAGTTGTTATAGATCTAGTAAATGTATTCTATCAAACAAATTTAAGTGATCTAGTGTATGGTAAGGATATAAGT	GTGTGTGTGTGTGTGTGTGTGTGTGTGTACTTCAGCTTCCCGATATCCGACGGTAGTGTNNNNNNNNAACACTTAAAGAGTGA	27708400	27708421	+	0	24039_0485
1:27708485-27708664/16,29/+	0.889285	1	27708485	27708500	1	GTGTATGGTAAGGATA	27708636	27708664	1	GTCTTGTTGATGAACCTTTAATTTCTTGT	27708501	27708635	TAAGTGTGTGTGTGTGTGTGTGTGTGTGTGTGTATAACTATATATACATGTATACATTTTAAATGTTGTACATTCAATCACATTTCTTAACATTTTTCTCATAATTTATTCAATAGTAATACTAAAGATTTCATT	GTCTTGTTGATGAACCTTTAATTTCTTGTCTTCAGCTTCCCGATATCCGACGGTAGTGTNNNNNNNNGTGTATGGTAAGGATA	27708504	27708533	+	0	24040_0064
1:27721192-27721371/19,25/-	0.980263	1	27721353	27721371	1	GAAGAAGCGGCGCAGTGAA	27721192	27721216	1	GTAGTGAGGAGGACTTGGCTGAAGC	27721217	27721352	GTTGAAGCTTAAAAGAAACCCTAGAGGAGAAGTTACAGGGAAGTGAAAGTGGAAAAACCCTAGCTTTAGAACTCAGAGCTAGATGATGATGATGATGATGATGATGATGATGATGTCTGACATCTCTAGAGGAAGA	GTAGTGAGGAGGACTTGGCTGAAGCCTTCAGCTTCCCGATATCCGACGGTAGTGTNNNNNNNNGAAGAAGCGGCGCAGTGAA	27721238	27721271	-	0	24046_0486
1:27748578-27748757/16,29/+	0.879126	1	27748578	27748593	1	TCTAATTCTCAACTCG	27748729	27748757	1	GCTCTAGGACAGAACGAAGGGTGTTTTCT	27748594	27748728	TTCATTTGAAATATCCATGTATATATATATATATATATATATCCACTACATTAATTAGAAGTTAGAACAAGTATTTAGAAATAACAAAATAGAAGTGGAATTATTATAGTATACTTACAACTTTTCTAATAACGG	GCTCTAGGACAGAACGAAGGGTGTTTTCTCTTCAGCTTCCCGATATCCGACGGTAGTGTNNNNNNNNTCTAATTCTCAACTCG	27748613	27748635	+	0	24058_0487
1:28132724-28132903/17,28/+	0.98041	1	28132724	28132740	1	GAAAGTAAACAACAAAA	28132876	28132903	1	GGAAAGAGAAAGAGGAGGAGATTTAAGG	28132741	28132875	CAGATGAAGAAACGTTTAAAGTTTGAACGTCAAAGGACGCAGAAATCAATGTGAAGAAGGAAGACGAGGAGTTACATAAATAAGAGAGAGAGAGAGAGAGAGGCAGAAGCGGTGAGTGAGATACATAAATAAATA	GGAAAGAGAAAGAGGAGGAGATTTAAGGCTTCAGCTTCCCGATATCCGACGGTAGTGTNNNNNNNNGAAAGTAAACAACAAAA	28132823	28132842	+	0	24252_0488
1:28179917-28180096/18,26/-	0.985156	1	28180079	28180096	1	GTGTGTGTGTGTTCTGTG	28179917	28179942	1	GTAGTTGTGCCTATTGTTAACCCATG	28179943	28180078	AATGATGATGATGATGATGATGATGATGATGAATGTCAGTTACTCGCACCAATCCTCTATTTATAAGTGCTTTTCCGAGGTAGTGTTATCATTTTTAATTTTGGTAAATATTTTCAGTTTACAGTAAAAATATACT	GTAGTTGTGCCTATTGTTAACCCATGCTTCAGCTTCCCGATATCCGACGGTAGTGTNNNNNNNNGTGTGTGTGTGTTCTGTG	28180047	28180077	-	0	24271_0489
1:28279197-28279376/16,29/+	0.970072	1	28279197	28279212	1	ACAGAGAACATAGAAC	28279348	28279376	1	TCATCAACAGCTCGCAATTCCTCAACATC	28279213	28279347	ATCAAAATCATCATCATCACCATCATCATCATCATGAAAAATGAATCGACAGAAATAAAGTCTCACCTCAGCATGATGTGATAATCATCAAGTGTAGGAGGAAGCAAATTCTCAGAGACGAGTAAATTACGGAAT	TCATCAACAGCTCGCAATTCCTCAACATCCTTCAGCTTCCCGATATCCGACGGTAGTGTNNNNNNNNACAGAGAACATAGAAC	28279219	28279247	+	0	24344_0490
1:28301705-28301884/21,24/+	0.974348	1	28301705	28301725	1	GGCTACGTCGCTTGTTGGTGG	28301861	28301884	1	GCCGACACTATTAGGGTAATACAC	28301726	28301860	GATAAATACCATCTCGTTGTTTCGAACATCACCGGAAACAATCTCGGAGAAAGATGCAGCAGAGGAAGAAGAAGCTTGTTGTTGTTGTTGTTGTTGTTCGTTGAGGTAAATGGATTCTTGGTAAAGAGATTGCAT	GCCGACACTATTAGGGTAATACACCTTCAGCTTCCCGATATCCGACGGTAGTGTNNNNNNNNGGCTACGTCGCTTGTTGGTGG	28301801	28301828	+	0	24367_0491
1:28340044-28340223/16,27/-	0.976905	1	28340208	28340223	1	AAAGAGGGGAATGAGA	28340044	28340070	1	CGGAGATCCTTATGGGGAGTTCCGGAG	28340071	28340207	TTGCTATCTACCTATATTTATATCTCCGCAACTTCACTCTTTTCCTCAATCAACACACACAAACACACACACACACAGCCTTTTTCCTTCGTTGATCGATTGTTAAGCTCGATCCAATGGCGGATAACACCGATAAT	CGGAGATCCTTATGGGGAGTTCCGGAGCTTCAGCTTCCCGATATCCGACGGTAGTGTNNNNNNNNAAAGAGGGGAATGAGA	28340131	28340155	-	0	24405_0492
1:28340228-28340407/18,25/-	0.929268	1	28340390	28340407	1	GCTGCCAGTAGACCAAAG	28340228	28340252	1	GAAATCTCAGTATGGTGGTTCCCAC	28340253	28340389	TAACAATATTTGGTGTGTACATCAAATGATAGGAAACAACAAAAACTCATTAATATACCTAAATCCATATATATATATATATATATATATTTCAATATTTCACATTGTTATAATTAGGTTTAATAGATACCATATTA	GAAATCTCAGTATGGTGGTTCCCACCTTCAGCTTCCCGATATCCGACGGTAGTGTNNNNNNNNGCTGCCAGTAGACCAAAG	28340300	28340323	-	0	24406_0493
1:28444100-28444279/17,27/-	0.912591	1	28444263	28444279	1	CGACTCATATGAACCTA	28444100	28444126	1	CGGTGTTGGAGCCCAATTTGCTTGTTG	28444127	28444262	AGCATGATTTCGACTCTAATAATAACAACGTCCAAACATATCATAGAAATTAGTTTACATTTGTATATAACTATATATATATATATATATATATATATATATATATATATATATCAATTCAAAGAAACAATAATTT	CGGTGTTGGAGCCCAATTTGCTTGTTGCTTCAGCTTCCCGATATCCGACGGTAGTGTNNNNNNNNCGACTCATATGAACCTA	28444149	28444199	-	0	24509_0065
1:28708379-28708558/20,25/-	0.95791	1	28708539	28708558	1	GGAAGCTTTTGGGTTGAGTT	28708379	28708403	1	GCAACTTCCAATTTGCATTAGACCC	28708404	28708538	AAATGGCCTGAAAATTAGGCCTTAGATGTGTCGTGTTGCTTTCGTGATCCACAATTGCATTCATATATATATATATATATATGATGAGGAAAGTCAAGAAAATTTTTTTTGAAGAAAAAAACTAAACATATTATT	GCAACTTCCAATTTGCATTAGACCCCTTCAGCTTCCCGATATCCGACGGTAGTGTNNNNNNNNGGAAGCTTTTGGGTTGAGTT	28708457	28708476	-	0	24669_0494
1:28766827-28767006/16,29/+	0.932969	1	28766827	28766842	1	GGGTCACAAACTATTA	28766978	28767006	1	CATAACTCTACAATCATCAGTGGTTCTTG	28766843	28766977	AATTATATACAATAAGAGATTAAATAAAAGAACAACAACAACAACAACAACAACAACAATGGAGGCTTAGCGCATCATAAGAGCAAACTCATCAAAGCTTAAAACTCCATCAGCATTGAGATCAAAAGCACTAAT	CATAACTCTACAATCATCAGTGGTTCTTGCTTCAGCTTCCCGATATCCGACGGTAGTGTNNNNNNNNGGGTCACAAACTATTA	28766873	28766901	+	0	24696_0495
1:28816747-28816926/19,26/+	0.974809	1	28816747	28816765	1	GGTTTGATGACGATGATGC	28816901	28816926	1	GGGGGAACTAAAGGATGATTACTTAG	28816766	28816900	GACTCTTACGATCACAATGCCGAAAAGAGTAAAAGGAATCTCTGGATTTAAGATTGAGGAAGAAGAAGAAGAAGAAGAAGAAGAAGAAGAAAGAGTGGATGTGAGTGAAGCTGAGCATAAAGAGGAAACAGAGAA	GGGGGAACTAAAGGATGATTACTTAGCTTCAGCTTCCCGATATCCGACGGTAGTGTNNNNNNNNGGTTTGATGACGATGATGC	28816824	28816856	+	0	24755_0496
1:28841933-28842112/16,28/+	0.982991	1	28841933	28841948	2	AGAGAAGGGCGACGAG	28842085	28842112	2	GCGAAGAACAGAAGATGTTTGGAAGGCA	28841949	28842084	GTGGCGATTAAGGTAATAAGGGGATCATTCCCTTCAACAACCTTTGTATAGAGAGAGAGAGAGAGAGAGACAAAAGTTGCTGAGGTTTCAACTTGATGCTTTTCTCTGGTTATATAACAGATTGTTGCTTCAAATC	GCGAAGAACAGAAGATGTTTGGAAGGCACTTCAGCTTCCCGATATCCGACGGTAGTGTNNNNNNNNAGAGAAGGGCGACGAG	28841998	28842018	+	0	24791_0497
1:28866577-28866756/18,27/-	0.979642	1	28866739	28866756	1	GAAACGAAGGTACATTAA	28866577	28866603	1	GCGTTTGTTGTTGATGATGGTGGAGTG	28866604	28866738	TCTGCTGAGTATACGGAGGAATTGATGAAGAAGGAAGCGTCGGCATAACTGTCGTTACCGGAGGAGGAGTTGAAAATATGGAGCTGTTGTTGTTGTTGTTGTTGTTGTTGTTGTTGTTTTGCTGTGGTCGAAGAG	GCGTTTGTTGTTGATGATGGTGGAGTGCTTCAGCTTCCCGATATCCGACGGTAGTGTNNNNNNNNGAAACGAAGGTACATTAA	28866614	28866654	-	0	24810_0066
1:28869139-28869318/17,28/-	0.977526	1	28869302	28869318	1	TTCTTCGAAGGTTGGGT	28869139	28869166	1	ACCAATCTGACACAAAATAGGTCTCTAC	28869167	28869301	AAGATATTGTAGATTCGTGTCTAGGTTTTAAGTAGTCATAGACAAATAATGATAAAAATGAAATATGTAAATACGCACATACACTGATACACACACACACACACACACACAAAAATGAGAAGAAAACAGCTCTTA	ACCAATCTGACACAAAATAGGTCTCTACCTTCAGCTTCCCGATATCCGACGGTAGTGTNNNNNNNNTTCTTCGAAGGTTGGGT	28869191	28869213	-	0	24813_0067
1:28903521-28903700/20,24/-	0.963238	1	28903681	28903700	1	GGTGGTTCTGTTTCCATGGG	28903521	28903544	1	GTTGGTAGGCGTAACCTACCTTCA	28903545	28903680	AAGATCAGGAGGAGGAGGAGGAGGAGGAGGAGGTAACGTTCAAACCATAGATGATTTTATGTTGAGACGTGGTGGAGTTCTCCCTTTAGACCATGGTCCAAATGGTCACACCATTGGTTTTGATCCCCCAGAACCT	GTTGGTAGGCGTAACCTACCTTCACTTCAGCTTCCCGATATCCGACGGTAGTGTNNNNNNNNGGTGGTTCTGTTTCCATGGG	28903648	28903674	-	0	24848_0498
1:28918601-28918780/16,29/-	0.904121	1	28918765	28918780	1	GGGTTAAGGTAACAAA	28918601	28918629	1	CGTGTGTGTATGTGAGAGCAGAAATCATA	28918630	28918764	TCAACTGGATTTTTTTATTAGGAAGTATAAGTATGTTTTACTTCCTAATAAAAAAATTCAAGTTGATTTGTTACTTTTTTTTTTTTTGTCGACACTTAACATATGTCAATATATATGTGTATATATATATATATA	CGTGTGTGTATGTGAGAGCAGAAATCATACTTCAGCTTCCCGATATCCGACGGTAGTGTNNNNNNNNGGGTTAAGGTAACAAA	28918630	28918656	-	0	24859_0499
1:28932205-28932384/17,26/+	0.981275	1	28932205	28932221	3	TTAGAGAAAGAGAAGAG	28932359	28932384	1	GCTTCTTTTTTTGAAGTTCTTGAGGT	28932222	28932358	GGTAGAGACTTCTTTTCTTTGTTTCTGTGGAGGCTCTTCTTCTTCTTCTTCTCTGTCTCTGTCTCTGTCTCTCTGTAATCTTCTGTGCTCTCCACAAATTTGTCTCTCCTCTCTCTCGCCGACTCCACAAATTTTGA	GCTTCTTTTTTTGAAGTTCTTGAGGTCTTCAGCTTCCCGATATCCGACGGTAGTGTNNNNNNNNTTAGAGAAAGAGAAGAG	28932255	28932293	+	0	24871_0500
1:28978332-28978511/21,23/+	0.980288	1	28978332	28978352	1	CAAACAAACAAAAAGGGAACC	28978489	28978511	1	CCTCTTCGCGTGAGTTTTGAAGG	28978353	28978488	AAAACACACCGTCTTGATTCTCTTGAATCTCTTCGGGAAGAACTATCTCCTCTTCTTCTTCTTCTTCTTCTTCTTCTTCAATGATCAACTCTTCGACTTTATTCGGTTTCGGTTCGAAAGTACTCGTTTTATTCTT	CCTCTTCGCGTGAGTTTTGAAGGCTTCAGCTTCCCGATATCCGACGGTAGTGTNNNNNNNNCAAACAAACAAAAAGGGAACC	28978403	28978431	+	0	24906_0501
1:29011965-29012144/16,27/-	0.983096	1	29012129	29012144	1	GCAAAACCGTATCAGA	29011965	29011991	1	GCAAAGGAAGCTTAATGCGGATGATGG	29011992	29012128	AATCGGTTTTGTATTCTTATTACCATTGCTCTCTCTCTCTCTCTCTCTCTCTCTCTGATCTCATTCATGTTTCGTTGAGTTTATAGGTTGAGATCCCTTATAGGTTCGTAGAATCTATGGTTGTTTAAGAGCGATGC	GCAAAGGAAGCTTAATGCGGATGATGGCTTCAGCTTCCCGATATCCGACGGTAGTGTNNNNNNNNGCAAAACCGTATCAGA	29012073	29012100	-	0	24931_0502
1:29079820-29080019/17,28/+	0.81658	1	29079820	29079836	1	GAAGTACATATTGGTCA	29079992	29080019	1	GACATCTTTTAAGCAAGGTTTGGCGACC	29079837	29079991	AATTAAATATCTAATCTAATAATAATAATAATAATAATAATAATACTATAGTCTCATGTATATACTTTTTGGTTTCACTTTTTAGTTCAAGAACATTATGTAATGTCTTTAAAATATATAAAGATGAGTCGATGACGCTTAGTTTCTTGAATTTT	GACATCTTTTAAGCAAGGTTTGGCGACCCTTCAGCTTCCCGATATCCGACGGTAGTGTNNNNNNNNGAAGTACATATTGGTCA	29079853	29079881	+	0	24954_0045
1:29093468-29093647/18,27/-	0.958772	1	29093630	29093647	1	GATCCATGGATTCTGGAG	29093468	29093494	1	CCGTTCGATTGTGACCCGAAACCAGTC	29093495	29093629	ATTCAATCCCAGATTGGGGAAGAAGACGAAAAGAGTAAGATTTTGTGCGGGAAATTTCTCACGTGCAACACGTGCTACGACGACGACGACGACGACGACAAAGTTTTCAACTACCAGAATGATGATCGACGTCAA	CCGTTCGATTGTGACCCGAAACCAGTCCTTCAGCTTCCCGATATCCGACGGTAGTGTNNNNNNNNGATCCATGGATTCTGGAG	29093531	29093553	-	0	24958_0504
1:29097869-29098048/27,18/-	0.981265	1	29098022	29098048	1	CATGACCATGAAAGAATGTTACTATCT	29097869	29097886	1	CCCCACCCACTAAGACAA	29097887	29098021	TATATAATACATATCCTTAGAAGATAAGTGCACATGAGGTATATTCTGTAAGAAGCCAGATGTGACAGAAAAAAAGAAGAAGAAGAAGAAGAAGAAGATGAGGAGAACAAAACTTACACAACGTAGACATGTCCT	CCCCACCCACTAAGACAACTTCAGCTTCCCGATATCCGACGGTAGTGTNNNNNNNNCATGACCATGAAAGAATGTTACTATCT	29097924	29097955	-	0	24959_0505
1:29135702-29135881/17,28/-	0.979556	1	29135865	29135881	1	GGGGATGGACAAAAAGA	29135702	29135729	1	GCACTGAGACGCGTGTAGTAGTACTCAA	29135730	29135864	TGATGGTTCATGTATTTTTTTTTGAATAAAAGATGATGGTTCATGTAGATAGTTTGCGATTGTTGTTGTTGTTGTTGTTTTGATATAGATAACAATGGCAAAGAAGATTGAATTCGAGATTCACACTAGTGCCAT	GCACTGAGACGCGTGTAGTAGTACTCAACTTCAGCTTCCCGATATCCGACGGTAGTGTNNNNNNNNGGGGATGGACAAAAAGA	29135783	29135805	-	0	24982_0506
1:29178786-29178965/18,27/+	0.977002	1	29178786	29178803	1	ACAACATAACATGGTGAA	29178939	29178965	1	GCGAAGTTGGGGATCATGGGTTACTGA	29178804	29178938	ACAAGAACTCAAGATCCAAGTTACTACTTCCTCATCATCACTCTCTCATTCTTCATCTTCTTCTTCTTCTTCAACGTCGGCACTACGTCATCAATCTTGTAAGAACAAGATAAAGAAGTATAAAGGTGTGAGGAT	GCGAAGTTGGGGATCATGGGTTACTGACTTCAGCTTCCCGATATCCGACGGTAGTGTNNNNNNNNACAACATAACATGGTGAA	29178852	29178875	+	0	25004_0507
1:29187669-29187848/17,24/+	0.989045	1	29187669	29187685	1	GGAGAAGAAGACGAGCG	29187825	29187848	1	GAGAAGCTTTGCGTCGGGTTTGGG	29187686	29187824	ATCTCTCAACTCCAGCAATATCTTGTTCTTATACGTCGTTTTTGTTTTCCGATACCGGAGAGTTTTCACGGCGAAGCTAAAAAGAAGGAGAAGAAGAAGAAGAAGCTCACTTTGCTTAGGAGAGATCGAGAAAGAGAGA	GAGAAGCTTTGCGTCGGGTTTGGGCTTCAGCTTCCCGATATCCGACGGTAGTGTNNNNNNNNGGAGAAGAAGACGAGCG	29187767	29187790	+	0	25016_0508
1:29306832-29307011/16,29/-	0.929547	1	29306996	29307011	8	AAATAATCAAAACACA	29306832	29306860	1	GTTACAAATGGTGAGCGGATAGAATTTTT	29306861	29306995	ATCTATTATTAGTTGGCACGAGAGAAATTGATCGAATGCAAAATTGTATATTTAAGTAAATGAGTCGACGAAAGGAGAGTTTTTAGGTTTGTGTTAAGAGAGAGAGAGAGAGAGAGAGAGAGAGAGAGAGAGAGA	GTTACAAATGGTGAGCGGATAGAATTTTTCTTCAGCTTCCCGATATCCGACGGTAGTGTNNNNNNNNAAATAATCAAAACACA	29306860	29306899	-	10	25087_0509_SNP_a
1:29312364-29312543/25,20/+	0.790919	1	29312364	29312388	1	TGTAACCACGTCTCATGCGAATTGA	29312524	29312543	1	GATTCTGGTGCTTTTAACAC	29312389	29312523	TTAGTTGTTGTTGTTGTTGTTGTTGTACAACACGGTGCTGGTGCTGGTTCTGGTATTGGTGTTGGTGCTGGTTCTGGTATTGGTGTTGGTGTTGATGTTGATTTTGGTTTTGATGTTGGTGCTGGTTCTGGTTCT	GATTCTGGTGCTTTTAACACCTTCAGCTTCCCGATATCCGACGGTAGTGTNNNNNNNNTGTAACCACGTCTCATGCGAATTGA	29312392	29312414	+	10	25089_0510_SNP_a
1:29427160-29427339/16,29/-	0.890856	1	29427324	29427339	1	GATAAACGAGATCTGC	29427160	29427188	1	CAAAGTTATGGAGAATGAGAGAGAAAAGC	29427189	29427323	TTCGACACATAATTGGATTCAACAATCCATATATATTATATATATATATATTTGTCACCATATATATTACATTTCTATCAACATCGAGCATCCCTTAACTCACATAATAAACATAGACCGAGAGAACTTAGAGAT	CAAAGTTATGGAGAATGAGAGAGAAAAGCCTTCAGCTTCCCGATATCCGACGGTAGTGTNNNNNNNNGATAAACGAGATCTGC	29427273	29427295	-	0	25204_0068
1:29448819-29448998/21,24/-	0.972426	1	29448978	29448998	1	TGATGGTTGCTCCTGATGATG	29448819	29448842	1	GCAACAAACATGCATGTGCTAGTG	29448843	29448977	ATGGTGATGTTGCTCCTCCTCCATAAAGCTGTTGCTGCTGCTGATAGTATTGTGCTTGTTGCAACTGTGTGTTGTACAATGCCTGTGGCAAGTATATGATCATCATCATCATCATCATAGTCGATGTCTATGTTT	GCAACAAACATGCATGTGCTAGTGCTTCAGCTTCCCGATATCCGACGGTAGTGTNNNNNNNNTGATGGTTGCTCCTGATGATG	29448860	29448879	-	0	25224_0511
1:29459202-29459381/17,27/+	0.95575	1	29459202	29459218	1	GGAATTATAGGAAGTGA	29459355	29459381	1	GCTATCGCTGCAGTATTTGATATGTGG	29459219	29459354	TGTAATAACAATAATAATAATAATAAAAAGGGATTAAGGTGGATCGCACATTTTCGGATTTGATCTTCTTGGGAAGCTGCTTTGCTTTTGGAACAGAGTCACTGCTTTTGACTCTGTTTGTGTGTTTGTGAGAGGA	GCTATCGCTGCAGTATTTGATATGTGGCTTCAGCTTCCCGATATCCGACGGTAGTGTNNNNNNNNGGAATTATAGGAAGTGA	29459221	29459244	+	0	25228_0512
1:29504455-29504634/21,24/-	0.983157	1	29504614	29504634	1	GTTCTGTATCTGCAAATTTCT	29504455	29504478	1	TTGCTTCTTTCTTCCTCTCCACGC	29504479	29504613	TTTTAATATTTCGACGGAAAAATCTCAGAAGAGAGAGAGAGAGAGAGAGAGAGAGAGAGAGATGGTGATGATGTGGAGAAGCTAAAAGGGAACAGGAAACGATGGAGTAAGAGACGAGCCAAAGAATCCAACTCT	TTGCTTCTTTCTTCCTCTCCACGCCTTCAGCTTCCCGATATCCGACGGTAGTGTNNNNNNNNGTTCTGTATCTGCAAATTTCT	29504552	29504587	-	0	25271_0513
1:29665779-29665958/16,26/+	0.9805	1	29665779	29665794	1	CGAGGTCGTAGGGATG	29665933	29665958	1	GCAGATTAAGCATAACGAGGTGATGC	29665795	29665932	CTTCAAGAGAGAAAGAAGATGGAGCTATTCCTATGAGAAAGGTACAATTGATCTTTTGTTGTTGTTGTTGTTGTTGTTGGTGTGATCATTTCTTAGGATTAGGTTTTCCAATGGAGGTAGCATTGTACACTTTTATCC	GCAGATTAAGCATAACGAGGTGATGCCTTCAGCTTCCCGATATCCGACGGTAGTGTNNNNNNNNCGAGGTCGTAGGGATG	29665850	29665877	+	0	25362_0514
1:29693681-29693860/17,28/+	0.777492	1	29693681	29693697	1	CTAGCATCATCATGGAG	29693833	29693860	1	CCCAAAATATAGTATAAAGGTGCTCAAG	29693698	29693832	TTATTAATTAGTCTATATTTAAGCTTATAACAGTCTATATATATATATATATATATATATTTAACAAATAGGATCGCACAAATTGGACTTGACACTAACAAATTGTTTATGAAGCTTAAAAATTGTTTCAGAATA	CCCAAAATATAGTATAAAGGTGCTCAAGCTTCAGCTTCCCGATATCCGACGGTAGTGTNNNNNNNNCTAGCATCATCATGGAG	29693733	29693757	+	0	25370_0515
1:29755862-29756041/16,28/+	0.98354	1	29755862	29755877	2	AAGAACAACACAATAA	29756014	29756041	1	GCTTGGAGTAAATGTGGTTCATGATCTG	29755878	29756013	CCTGCTGTCTAATCTATACTTTTGATTCAAACTGATTAACCAATTCTTGATTTGGTGGTGAAAGTGAATCAGTGATCTGACAACGACAACAACAACAACCACCACCACCACCACCACCTTTGTCTTTTGTCTGTTT	GCTTGGAGTAAATGTGGTTCATGATCTGCTTCAGCTTCCCGATATCCGACGGTAGTGTNNNNNNNNAAGAACAACACAATAA	29755975	29755995	+	0	25397_0069
1:29860690-29860869/17,28/+	0.980297	1	29860690	29860706	1	GGCGTCTTGAAGAGTAG	29860842	29860869	1	GGAAGTGGAAAAAGCAGAAGCAGTAGAA	29860707	29860841	TCTTCTTAAATATTCCAGCCCAAAAAAAAAAAGATTCTATCCATTATCAAGAGAAGAAAAAAAATCTGAATTCCAATTCGAAGAAGAAGAAGAAGAAGAAAGGAGATGACTATGGGGAATTTCTTAAAGAGATTT	GGAAGTGGAAAAAGCAGAAGCAGTAGAACTTCAGCTTCCCGATATCCGACGGTAGTGTNNNNNNNNGGCGTCTTGAAGAGTAG	29860786	29860806	+	0	25471_0516
1:29873290-29873469/16,29/-	0.97164	1	29873454	29873469	1	TATTCGTTGGGGTTTG	29873290	29873318	1	GATGAAGCATATAGTACATTACATAGGGT	29873319	29873453	AACGACAAGAACAATAAAGCAAAAGATTTAAAAGAAAGAAAGAAAGAAAGAAAGATAAAGTGAAAGACAAACTTTGATAATCCCAAGAAGTTCCCCCACTTTAAAAATTGAATGAATGTGTAAGATCGTATTCAT	GATGAAGCATATAGTACATTACATAGGGTCTTCAGCTTCCCGATATCCGACGGTAGTGTNNNNNNNNTATTCGTTGGGGTTTG	29873399	29873423	-	0	25485_0517
1:29877355-29877534/17,26/-	0.921722	1	29877518	29877534	1	CGCCATTTGGGTGATAC	29877355	29877380	1	GCTTTGTTATGTTTACCGGATTAGTT	29877381	29877517	AATTTATTAATTTTTATCTATGAGTGATGCATGGGAATGTAAGAACGAGATATATATGTTTTGTCATTGTGAGTTTGACGTAGGGTTTAGAGATGAGACAAAACAAAACAAAACAAAAAAAAATAAAAAATATATAA	GCTTTGTTATGTTTACCGGATTAGTTCTTCAGCTTCCCGATATCCGACGGTAGTGTNNNNNNNNCGCCATTTGGGTGATAC	29877390	29877420	-	0	25488_0518
1:30016112-30016291/16,28/-	0.953997	1	30016276	30016291	1	GTCATCCGAACACACA	30016112	30016139	1	GTAGGAGGGAGAGAAAGACCAGTTGGAG	30016140	30016275	CATTCTGTTTTGCTGCTTTTCTTTTATTATAATATATATATATGCATTCAGATAAAAAGAAAATTCTAATTGCTATGTCTGTCCCTAATTATAATGCTCGTAAGAAGAAGAAGACGAAGAAGAAGAAGACTGACTG	GTAGGAGGGAGAGAAAGACCAGTTGGAGCTTCAGCTTCCCGATATCCGACGGTAGTGTNNNNNNNNGTCATCCGAACACACA	30016147	30016174	-	0	25572_0519
1:30018451-30018630/18,27/+	0.980151	1	30018451	30018468	1	ATAAAGCAGAGCCAGCCA	30018604	30018630	1	GTGCCCTTGTGGTGGCTTCCATGGCGG	30018469	30018603	CCTTCATTTTTACACACAACCATCAAAGCTACGTACGAATTCCTCTCAAACATACTATATACTTACAAAAGAACAAGAAGATGATGATGATGATGATGAGATCTACTTGTAATCTAACACTAATGCTCTGCATTT	GTGCCCTTGTGGTGGCTTCCATGGCGGCTTCAGCTTCCCGATATCCGACGGTAGTGTNNNNNNNNATAAAGCAGAGCCAGCCA	30018548	30018570	+	0	25576_0520
1:30036590-30036769/17,28/-	0.980486	1	30036753	30036769	3	CTTCTCTGTCTCTTCTT	30036590	30036617	1	ACCTAATTCTCCAACCGCATTTTCTGCT	30036618	30036752	TAATTGAATTGTGTGTATAGACTAGAGAGAGAGAGAGAGAGAGACATATGTGTATGTCAGATTTCTTAATTGTTTTCTCTAGAGAGAGAGAGAGTTGACCGTTAGATACTGAGATGGACTCAACTAACTTTTAGC	ACCTAATTCTCCAACCGCATTTTCTGCTCTTCAGCTTCCCGATATCCGACGGTAGTGTNNNNNNNNCTTCTCTGTCTCTTCTT	30036709	30036729	-	0	25585_0521
1:30047273-30047452/27,18/-	0.992829	1	30047426	30047452	1	TGGGAGTGGGGGATGCTTTGTGTTTTG	30047273	30047290	1	GTCCCACAACGAGTCCGT	30047291	30047425	ATATATATATATATATATATATATATATATATATATATATAGCGGATTGGCATGACCTGACTATTCCTGTTTGATATGCAGGAGTGATTTTGACTGTCAAAGAGAGAATATGATCAAGCAACTCGGAAAATCAGA	GTCCCACAACGAGTCCGTCTTCAGCTTCCCGATATCCGACGGTAGTGTNNNNNNNNTGGGAGTGGGGGATGCTTTGTGTTTTG	30047385	30047425	-	0	25591_0522
1:30048745-30048924/17,28/-	0.980667	1	30048908	30048924	1	TGGAGAGCACTGCAGAT	30048745	30048772	1	GGCTTTCGAGCATGGAGACGCCTCCCTT	30048773	30048907	AATGCTTAGAGATTTTCCAGTCCCTAAGAGAGAGAGAAAGAGAGAGAGAGATCAAACCCTAAGTGAGTCTACTTACTTACTACTGAGTAATAACTGATCCAATGTGGAAAAAAAAATATATATATATACCAGTGG	GGCTTTCGAGCATGGAGACGCCTCCCTTCTTCAGCTTCCCGATATCCGACGGTAGTGTNNNNNNNNTGGAGAGCACTGCAGAT	30048857	30048881	-	0	25595_0523
1:30082295-30082474/22,22/-	0.978097	1	30082453	30082474	1	CGATGACTATCTATGTATAGAG	30082295	30082316	1	TTTACCATCAGTGGCGGCTCTC	30082317	30082452	AATCTTTCAAATGAAGAAAATAATATAAAGTCTCCTAGTCAAAATGGATGACTATAGATAGATAGAATCTCAAAAAGTAGTGGTAGTAGAAGAAGAAGAAGAAGAAGAAGTAGAGAGGTTAAGGATGAAAAGCAAA	TTTACCATCAGTGGCGGCTCTCCTTCAGCTTCCCGATATCCGACGGTAGTGTNNNNNNNNCGATGACTATCTATGTATAGAG	30082339	30082365	-	0	25619_0524
1:30104376-30104555/17,27/+	0.980936	1	30104376	30104392	1	GGTTAATGGGCTTTGGG	30104529	30104555	1	GGGTTTTGAGCTTTTTTTCTTTTCGGC	30104393	30104528	GATGATGAGCTGATTTTGTTCGGCTCTGCTTCTTTCTTTTTGATCGAAAGAGATTCTCAATAGAGAGAGAGAGAGAGAGAGAGAGAGAGGCTAAACTCTTCTCTTGCGTCTGTTTTGGACCTTATTATTACGGCTA	GGGTTTTGAGCTTTTTTTCTTTTCGGCCTTCAGCTTCCCGATATCCGACGGTAGTGTNNNNNNNNGGTTAATGGGCTTTGGG	30104454	30104481	+	0	25638_0525
1:30114108-30114287/16,29/-	0.966183	1	30114272	30114287	1	AATGGAACTGGTGATG	30114108	30114136	1	GCATACATAATAACATAGGTGGGGCACAA	30114137	30114271	TAATCACTTATCTCAAATTATATGGTAAGAAGAAGTAGTACTAGTAGTAGTAGTAGTGCGGAGCTTAAAATGTTAAACCATATATCTAGACGAAATCTAAAGCCAACCAAATCTCTACTTGTGATTGAAAAAACG	GCATACATAATAACATAGGTGGGGCACAACTTCAGCTTCCCGATATCCGACGGTAGTGTNNNNNNNNAATGGAACTGGTGATG	30114215	30114238	-	0	25639_0526
1:30134227-30134406/22,23/+	0.980314	1	30134227	30134248	1	GTCTGCGTTGCCTTTCGTTCTG	30134384	30134406	1	CGATGCTTCAGGTGCTTGAGAGG	30134249	30134383	CTTCCGAGCTTAGCAACCGCCCAGGGTACAAATTAAACGAGCTATATATATATATATATATATATATATATATATACTTCTTTGTATTAATATATAGGTCAATATTTAAGTCAATATAATGCTTCATAAATGTGA	CGATGCTTCAGGTGCTTGAGAGGCTTCAGCTTCCCGATATCCGACGGTAGTGTNNNNNNNNGTCTGCGTTGCCTTTCGTTCTG	30134291	30134324	+	0	25646_0527
1:30222950-30223129/20,25/-	0.981479	1	30223110	30223129	10	TTCTTCTTCTTCTTTCTTCT	30222950	30222974	1	CTATAAATGAGCCCACACCACACGA	30222975	30223109	TTTTTAGTTGACAGTGATTTCTTCTTCTTCTTCTTCTTTTGATACCAGGCTAATAGAAATTAAAACTGAAAAGATATCCGTACACATGCAATTACATCCACTAATGACAGTTTAGAAGATGCTAAGTGGCTATAA	CTATAAATGAGCCCACACCACACGACTTCAGCTTCCCGATATCCGACGGTAGTGTNNNNNNNNTTCTTCTTCTTCTTTCTTCT	30223072	30223091	-	0	25706_0528
1:30267010-30267189/20,25/+	0.97945	1	30267010	30267029	1	CGACCAGAAAGTAAGAAAAA	30267165	30267189	1	GCGAAGGTGACGGATAACGGAGTCT	30267030	30267164	AACTAATGGAAAAAAAAAAAACAAGTTTTCTCTCTCTCTCTCTCTCTCTCTTCAGGCTTATTTATACGAACATTAAAATCTTGCAGAAATGGAGACTTTAATTTAAAACCAAAAAATAAAAAGTGATTTTAATAT	GCGAAGGTGACGGATAACGGAGTCTCTTCAGCTTCCCGATATCCGACGGTAGTGTNNNNNNNNCGACCAGAAAGTAAGAAAAA	30267058	30267080	+	0	25736_0529
1:30272884-30273063/17,28/-	0.980673	1	30273047	30273063	2	GAAAGAAGAAGATAAAC	30272884	30272911	1	GCCTCGTCGGCGAGCGATACACAGAGAT	30272912	30273046	TTTGTGATTATCCGAGATCGAAGAAGACGAAAGAAGAGACTTTTATGAATCTCGACCAAGAGAGAGAGAGAGAGAGAGAGAGAGAGATTGTTCAAATCGGATTAAGGGTCAACGTCTCAATTGGTCGTCCTTCCT	GCCTCGTCGGCGAGCGATACACAGAGATCTTCAGCTTCCCGATATCCGACGGTAGTGTNNNNNNNNGAAAGAAGAAGATAAAC	30272960	30272988	-	0	25739_0530
1:30287527-30287706/16,29/-	0.968441	1	30287691	30287706	1	CAGAATTGACCCCAAA	30287527	30287555	1	GCACGAAGCTGCAACAAGGCCGTTATCGG	30287556	30287690	GTTTTTAATTTTGTAAATGGACACCTTACATTACCACATACAACATATATATATATATATATATATATATATATATATCCATTTATTAGCAGCACCTCACAGAAGAAGGAGGGCTCATCAAATACTTGAAGAGCC	GCACGAAGCTGCAACAAGGCCGTTATCGGCTTCAGCTTCCCGATATCCGACGGTAGTGTNNNNNNNNCAGAATTGACCCCAAA	30287613	30287646	-	0	25746_0531
1:30294115-30294294/16,29/+	0.947101	1	30294115	30294130	1	GGATAATAGGATGAGG	30294266	30294294	1	GATAATCTTGAAAAAATGGGTCTAGAGCT	30294131	30294265	CAGAAGCAGAAGAAGAAGAAGAAGAAAAAAGTGAGTGTGAGGAAGTGTGTTAAAGTCACATCGGTTGCACAGTTGTTCGATGATGCCAATTTTATAAATTCTTCTAGTATTAAAGGAAATGTGATTAGTTCTATT	GATAATCTTGAAAAAATGGGTCTAGAGCTCTTCAGCTTCCCGATATCCGACGGTAGTGTNNNNNNNNGGATAATAGGATGAGG	30294132	30294156	+	10	25749_0532
1:30301914-30302093/16,28/+	0.951089	1	30301914	30301929	5	CCTTCTTCTTTCTTGA	30302066	30302093	1	CACACCAAACTAATACCGTAAAAACAAT	30301930	30302065	TCTCTTGAAAAGGGTTGTTGTTGTTGTTGTTGTTATTGCACTCGTTTGAGAAATCTGGACATCAAAACAAAAACAATCAGATTATGGCTTAAGACACACAACACCACCAGATAAAGCCAGCTCAACAATCAATAAT	CACACCAAACTAATACCGTAAAAACAATCTTCAGCTTCCCGATATCCGACGGTAGTGTNNNNNNNNCCTTCTTCTTTCTTGA	30301943	30301967	+	0	25752_0533
1:30368618-30368797/16,28/+	0.982363	1	30368618	30368633	1	AAGGTGTAGAGGCTGA	30368770	30368797	1	GATCATATGGAGGATGAAGCAGAAGAAG	30368634	30368769	AACTAAGGAAGAAGAGAAACAATATCCAAATTCAGAGGGTGAGAGTGAAGGAGAGGACTCAGAGTCAGAGGAAGAGCCGAAATGGAGAGAAACAGATGATATGGAGGATGATGAAGAAGAAGAAGAAGAAGAGATT	GATCATATGGAGGATGAAGCAGAAGAAGCTTCAGCTTCCCGATATCCGACGGTAGTGTNNNNNNNNAAGGTGTAGAGGCTGA	30368746	30368765	+	0	25786_0534
1:30384191-30384370/16,29/+	0.976581	1	30384191	30384206	1	TGTGGTGGGTTCTTGA	30384342	30384370	1	GGTGGAAGAATTAAACCGAGTTAGTGCTG	30384207	30384341	AATATAGATGTAACGCTAGATCATAAAATCATATTAAACTTATAGTATGAAGAAAATAATATGGTTACTAACTTCATGCAATATATATATATATATATATATATATATAAATGATAAATTGCAGACAAGTGCTTT	GGTGGAAGAATTAAACCGAGTTAGTGCTGCTTCAGCTTCCCGATATCCGACGGTAGTGTNNNNNNNNTGTGGTGGGTTCTTGA	30384287	30384315	+	0	25797_0535
1:30390873-30391052/17,28/-	0.836248	1	30391036	30391052	4	CAAAAATCAAAATAAAG	30390873	30390900	1	ACTCTTACATAGTCTAAAATGCTTTCCA	30390901	30391035	AGAGTGAGTCAGAGTAAAAGAATCTCCACTGTCTTTTGTTGTGTTGCCCTTACAGAGTTTTGGTGTTTGATTTGAACCATTAATTATTATCATCAATAGTCTATCAACAACAACAACAACAACAACAACAACAAA	ACTCTTACATAGTCTAAAATGCTTTCCACTTCAGCTTCCCGATATCCGACGGTAGTGTNNNNNNNNCAAAAATCAAAATAAAG	30390899	30390931	-	0	25806_0002
1:30397062-30397241/16,29/+	0.98193	1	30397062	30397077	1	GAATGGGCCTAAATAG	30397213	30397241	1	GGGAAATGAGAGCAAGAGCAATTTGGGAG	30397078	30397212	GGCCCATTTTAGATTTCTTTAAAAGATCCGAGAGAGAGAGGGATCTAATTCCTGATAAACCCTAGAAGAAGAAGAAGAAGAAGAAGAAGAAGAAGAAGAAGAAGAAGAAGAAGCAAAACCTGTGGAGATCGAGAT	GGGAAATGAGAGCAAGAGCAATTTGGGAGCTTCAGCTTCCCGATATCCGACGGTAGTGTNNNNNNNNGAATGGGCCTAAATAG	30397141	30397190	+	0	25811_0004
1:30412201-30412380/16,28/+	0.953675	1	30412201	30412216	1	GGAGGAAAAAGAACCA	30412353	30412380	1	GAAATATTCAGACCACGAATTTCGAGTG	30412217	30412352	TTTGGTGTGTGTGTGTGTGTGTGTATCTTTCTTCAGCAAGAAACAGAGGCAAAATAAATACAAGTTTCAGAAATGAGATGTGTTAAATGTATATTACTAAAGTTGTGTTAAAAGTTTCCTTCTCCTATGAATAAAT	GAAATATTCAGACCACGAATTTCGAGTGCTTCAGCTTCCCGATATCCGACGGTAGTGTNNNNNNNNGGAGGAAAAAGAACCA	30412221	30412240	+	0	25820_0005
1:30416057-30416236/16,29/+	0.974255	1	30416057	30416072	1	GTGCCAATATGGAGAG	30416208	30416236	1	GTGGTGATGACGATGAAATAGAAGATGTG	30416073	30416207	ATCATCATCATCATCATCATCGTCATGTGATAAGGTAATATTGACTGGATCAGCAAATTCGCCGACGAATTAGAGTGGAATCTCAGAGGGAATTTTTTTCTACGATTTGTCTAATCTGATTCGAAATTTTGTCTT	GTGGTGATGACGATGAAATAGAAGATGTGCTTCAGCTTCCCGATATCCGACGGTAGTGTNNNNNNNNGTGCCAATATGGAGAG	30416073	30416098	+	10	25822_0006_SNP_a
2:160773-160952/17,25/-	0.966192	2	160936	160952	1	CAAACCAGACCAGAAAA	160773	160797	1	TGACGCACTCCTTCACCGATTCTTC	160798	160935	AGCCGGTACAATGTCTCTCGACATCAGCTGACTCAAAATTAGCAAATGTTTGATGAATCGTTCAAAATCCCCAACCCTTAATTTCCTCCTAAACTTTCTCCTCCTCTGAAGAAGAAGAAGAAGAAGAAGAAGAAGAAA	TGACGCACTCCTTCACCGATTCTTCCTTCAGCTTCCCGATATCCGACGGTAGTGTNNNNNNNNCAAACCAGACCAGAAAA	160799	160828	-	0	26035_0001
2:208231-208410/19,26/-	0.968814	2	208392	208410	1	TGTATATCAAAAGGGATAC	208231	208256	1	GTCTTTTCTGCATTGAAGATCGATGC	208257	208391	TGACAAAGCTAAACTCCTCACTACTGAGAGAGAGAGAGAGAGAGAGAGAGAGAGAGAGAGAGAGAGAGAGAGAGAGAGAGAGAGAGAGAGAGAGAGAGAGAGAGAGAAAACCAGCTAAAAGATATGTTTACTAAA	GTCTTTTCTGCATTGAAGATCGATGCCTTCAGCTTCCCGATATCCGACGGTAGTGTNNNNNNNNTGTATATCAAAAGGGATAC	208285	208366	-	0	26078_0002
2:214239-214418/16,25/-	0.97038	2	214403	214418	1	AGAGACGAATCAACCG	214239	214263	1	GCTGCATCGTTTTGTCCGGCGGAGG	214264	214402	TCGAATATGCAGACTTACGGTGTACCGATTTACGCCGCCGACTGGATTCCGGAGGTAGATGTCAGATCCAAAATCATAATGGATCCGGAGAAATCTGAAGATGATGATGAGTCGTCTTCTTCTTCTTCTTCTTCCCGGA	GCTGCATCGTTTTGTCCGGCGGAGGCTTCAGCTTCCCGATATCCGACGGTAGTGTNNNNNNNNAGAGACGAATCAACCG	214269	214288	-	0	26079_0003
2:273229-273408/22,21/-	0.80637	2	273387	273408	1	GAACTAGAAGTCTAGAAGTGAG	273229	273249	1	GTAGCTAGAATGCCTTTTGGC	273250	273386	AATTATATTGTGTAGATTGTTTCTTCTATATTTGTATGCTCGTCTAACATTTATTATTATTATTATTATTATTATGCCAAACTGTGTTATTATTAAAATATTTAAAAAGTTATTAATTTATTGAAGTTATACTATAT	GTAGCTAGAATGCCTTTTGGCCTTCAGCTTCCCGATATCCGACGGTAGTGTNNNNNNNNGAACTAGAAGTCTAGAAGTGAG	273312	273336	-	0	26127_0004
2:278165-278344/16,29/+	0.978003	2	278165	278180	3	AAGAAAAACTAAAAGA	278316	278344	1	GCGTTTCGCGATCTCTCAGAGACGCGATC	278181	278315	GAGCAAATTCAGAAGCTGAGAATATGAAGACGGAGCTTGAAGAAGAAGAAGAAGAAGAATGGAGATCCGTTCACGAGGTTTTATTAATCGTTCTTCCTTATCTTCATTCTCTGTTCGAGCTTCTCTCTATGATTC	GCGTTTCGCGATCTCTCAGAGACGCGATCCTTCAGCTTCCCGATATCCGACGGTAGTGTNNNNNNNNAAGAAAAACTAAAAGA	278219	278239	+	0	26133_0005
2:309209-309388/20,25/-	0.97774	2	309369	309388	1	GATTTACCGGTTTTTTCCCT	309209	309233	1	CCACCTTCTTCGACATCATCATCAG	309234	309368	TAGCAATTGGAGTGTTAAGAGATATGGATAGTCTCATTGTGCTTTAATTTGATGTATTAGGAGGTGAGGAGATCTGAAGAACAACAACAGCAGCAGCAGCAACAACAACAGCAACAACAACAACAACAACGACCA	CCACCTTCTTCGACATCATCATCAGCTTCAGCTTCCCGATATCCGACGGTAGTGTNNNNNNNNGATTTACCGGTTTTTTCCCT	309239	309289	-	0	26155_0006
2:336390-336569/16,29/-	0.914618	2	336554	336569	1	TGTTTCCCCTCGTTCT	336390	336418	1	CGGAGGAAGATAAGATTACAAGAATCTCT	336419	336553	TTACGTATATATATATATATATATATATATATATATATATATATATATATATATCATGTTCCCACACACACACTTCACAACTTTGAGAAAGAAAAAAAACGAGAGAGAAAGAGAATCGATCATCAACAATGTCGT	CGGAGGAAGATAAGATTACAAGAATCTCTCTTCAGCTTCCCGATATCCGACGGTAGTGTNNNNNNNNTGTTTCCCCTCGTTCT	336500	336548	-	0	26172_0007
2:346306-346505/17,28/-	0.828514	2	346489	346505	1	CAAGATAACTAGGTAAG	346306	346333	1	GGATTTTGAGTCATTTTAACCGCGGGGG	346334	346488	TAAAACTTTTAAAGATTAAAGTAAAATATATATATATATATATATATATTATCACTTTTGATATGTAATTAAATTAAATAAATAAAAAAATCTAAGCAAAACATAATCAAAATTTAAGCAAATGATAATGAAATACGTGTAAAAGTACAAATTGT	GGATTTTGAGTCATTTTAACCGCGGGGGCTTCAGCTTCCCGATATCCGACGGTAGTGTNNNNNNNNCAAGATAACTAGGTAAG	346437	346463	-	0	26181_0046
2:388002-388181/25,20/-	0.916917	2	388157	388181	1	GAAATCAAACACAAAGCTTATAAAA	388002	388021	1	TCAATTATCCGACCCGGTAA	388022	388156	AGGATTAAACTTTAGGTCTAGAAACAAAAACCCTTGAAGAATACGAAAGAACTATCTTAGTCTAAAGAGGAAATTTGATGAGAATCTTAGCGAGCTTGAGATAGAGAGAAGAAGAAGAAGAAGAAGAAGAAGAAA	TCAATTATCCGACCCGGTAACTTCAGCTTCCCGATATCCGACGGTAGTGTNNNNNNNNGAAATCAAACACAAAGCTTATAAAA	388023	388058	-	10	26216_0009_SNP_a
2:457021-457200/16,26/+	0.985244	2	457021	457036	20	ATTCTTCTTCTTCCTC	457175	457200	1	GCCGTTCTCTTCGTCGGAATGTCTCT	457037	457174	TGTGTTGTTGCTTCTTAGATATATTCAAATAAAATGACGACTGTAATCGACGCGACGATGGCGTATAGATTTCTGGAGGAAGCGACCGATTCGTCTTCTTCTTCTTCTTCTTCCAAACTAGAATCTAGCCCTGTCGAC	GCCGTTCTCTTCGTCGGAATGTCTCTCTTCAGCTTCCCGATATCCGACGGTAGTGTNNNNNNNNATTCTTCTTCTTCCTC	457126	457149	+	0	26278_0010
2:465918-466097/26,19/+	0.798104	2	465918	465943	1	GAGTTCTTAAATGACTAATATCAATT	466079	466097	1	CACGTCTCCGTTCGGAGCT	465944	466078	AAACTTAGGTTTCGAATGATAACCAAATCTCATAGTGCGGTGCGTTTTAAATAGTAACGAAATTTTTTGCATATATATATATATATATATATATATTTGTTACTATTTGAACTGCACTGTATCCGCAGTTGAACG	CACGTCTCCGTTCGGAGCTCTTCAGCTTCCCGATATCCGACGGTAGTGTNNNNNNNNGAGTTCTTAAATGACTAATATCAATT	466014	466039	+	10	26285_0011_SNP_a
2:654329-654508/17,28/+	0.973449	2	654329	654345	1	ACAAACAGTCTCGCCAA	654481	654508	1	GGTACAGATGAGTTCTGGATTTGCTGCG	654346	654480	TCCGAATCTCTCTCAAAGGTTGCAAAGATGTCATCTCCACCGCCAAAAGAAGAAGAAGAAGAAGAAGATGAGAGTGAAGATGAGAGTGAAGACGATGAACAAGGTGCGGTTTGTGGTGCTTGTGGAGACAACTAC	GGTACAGATGAGTTCTGGATTTGCTGCGCTTCAGCTTCCCGATATCCGACGGTAGTGTNNNNNNNNACAAACAGTCTCGCCAA	654392	654413	+	0	26541_0012
2:712588-712767/16,27/-	0.985134	2	712752	712767	1	CAAAAGCACACGAAAA	712588	712614	1	GGGTTTCCCCTACTTCAAGTGTTTACT	712615	712751	ACGTTGACAAAAAAAACAAACAATATATATATATATACAACAACAACAACAAAAACAACAACAACATATTAGAAAAAGCGTTGCAGAAAAAATTTAAAAGAAAACAGATAACTCAATGGTTGTCGACATGTATTGTA	GGGTTTCCCCTACTTCAAGTGTTTACTCTTCAGCTTCCCGATATCCGACGGTAGTGTNNNNNNNNCAAAAGCACACGAAAA	712686	712715	-	0	26614_0015
2:799305-799484/21,24/+	0.983632	2	799305	799325	1	TTTTTTGTTTACTCTGCGGCG	799461	799484	1	CCATACATACAAAAAGTCGTGGTG	799326	799460	CAAAAGCTGATTGTAATAATTATAATCACTAAATTATCCAACTAAAGAAAAGAAAAAGAAGATTTTTGAAACCAGAATTAGAGAAGAAGAAGAAGAAGAAGGAAGGAAGAAGGAACACAGAGAATCACAGCACAA	CCATACATACAAAAAGTCGTGGTGCTTCAGCTTCCCGATATCCGACGGTAGTGTNNNNNNNNTTTTTTGTTTACTCTGCGGCG	799407	799437	+	0	26713_0016
2:889534-889713/17,28/+	0.79359	2	889534	889550	1	AAGGAGACTGTTCTCCC	889686	889713	2	GTTGCAAATAAGACACTTTTTGGTGTTT	889551	889685	CTTCTCTACCAAAAAAAGTATATATATATATATATATATATATATATATATATATATATATATTTATTTTCGTGTTTTGTCTCCAGATTCCAAGATGATGGATTCGTACTATAGTGTTTTTAATGCAGACGTCAT	GTTGCAAATAAGACACTTTTTGGTGTTTCTTCAGCTTCCCGATATCCGACGGTAGTGTNNNNNNNNAAGGAGACTGTTCTCCC	889569	889617	+	0	26803_0017
2:967733-967912/20,24/+	0.980708	2	967733	967752	1	ATCCACATGTCGAAGACTCA	967889	967912	1	CATGGTTTGTGTGTGTGTGAGTGG	967753	967888	ATCGAAAACCGGATCTCGGAAGGTTTTTCGGAAGAGTACGGTCGATTAATGATCTTCTTGACGATGAAACCGAGATTAAACATGAAAAAAGAATAAGAAAGAAAGGAAATAATAAAGAAGAAGAAGAAGAAGAAGC	CATGGTTTGTGTGTGTGTGAGTGGCTTCAGCTTCCCGATATCCGACGGTAGTGTNNNNNNNNATCCACATGTCGAAGACTCA	967867	967887	+	0	26891_0018
2:973307-973486/16,28/+	0.961242	2	973307	973322	1	GAACAAGGGGAGGAGG	973459	973486	1	GGTTTTTAAGTCATTGCTTTGTTGATGC	973323	973458	CAGCCGCTGCGGCGAAGAAGAAGGAAGAAGAAGAAGAAACCAAGGGAAAGTGAGCGATTATTAGAATTTATTTGGTTAAGTTATTCTGATACTTTGAATGTTTCTGATTATTACTTTTGTTATTGTGGGAGAATTT	GGTTTTTAAGTCATTGCTTTGTTGATGCCTTCAGCTTCCCGATATCCGACGGTAGTGTNNNNNNNNGAACAAGGGGAGGAGG	973336	973360	+	0	26895_0019
2:1015795-1015974/17,27/+	0.966131	2	1015795	1015811	1	GAGGCTCGAATCTGAGA	1015948	1015974	1	GCAGTGACTTGTGCTAAAGCTTGTTGA	1015812	1015947	CCTAGGTGCAGAAGAAAATGATGGAATCTCAGTCAATGAAGCTTGTTGTTGTTGTTGTTGTTGTTGTTGTGTAGAAGAAGGATATTCAGATTGTTGTGATTGCTGCATATGAACATTATTGCCTTGAACTGCTTGT	GCAGTGACTTGTGCTAAAGCTTGTTGACTTCAGCTTCCCGATATCCGACGGTAGTGTNNNNNNNNGAGGCTCGAATCTGAGA	1015854	1015881	+	0	26942_0020
2:1064108-1064287/17,27/-	0.981817	2	1064271	1064287	1	AACACAATCCAAGAAGA	1064108	1064134	1	TCCGAGGTTTAACCACAGACAAGAATC	1064135	1064270	TAGCTTCAAAGACAGAGGAGAAGAAGAAGAAGAAGAAGAAGAAGAAGAAGAAGAAGAAGAGATGAGATTTTAGATGAGAGAGATATGAGTTTATTAATAAAAGAGAGTGATAAAGACCATACCATCTCTCTCTGGT	TCCGAGGTTTAACCACAGACAAGAATCCTTCAGCTTCCCGATATCCGACGGTAGTGTNNNNNNNNAACACAATCCAAGAAGA	1064211	1064262	-	0	26993_0022
2:1164270-1164449/16,29/-	0.967146	2	1164434	1164449	1	CACCCAAAAGAGAGAA	1164270	1164298	1	GGAGGAGAGACATCAAGAGAATCTACAGC	1164299	1164433	AAAAATATTTACCTTCAGTAATAAAAAAAAAAAGCACTCTCATTTTAAGAAAATATTATAAAATTTCATAAATCTTTCCTCTTCTTCTTCTTCTTCTTCTGTGCTTCAAAGTGAATAGCTTTAGGACTAAATTGT	GGAGGAGAGACATCAAGAGAATCTACAGCCTTCAGCTTCCCGATATCCGACGGTAGTGTNNNNNNNNCACCCAAAAGAGAGAA	1164334	1164358	-	0	27077_0025
2:1187704-1187883/16,29/-	0.97372	2	1187868	1187883	2	GAAGTGGAAAGCTTTG	1187704	1187732	1	GCTTCCCGAGCGAAGAACGTCCATTTGAA	1187733	1187867	AAAGAGATGGAGCCTTGTCATGAAAAGCAGCTGAACTAAAAAAACTGTCTTTCATAATGATCATAGGGACAGTATTTTCAGTTTTGTCCTCTTCTTCTTCTTCATCTTCTTCTTCTTCCTTGATGCTTTCTTCAA	GCTTCCCGAGCGAAGAACGTCCATTTGAACTTCAGCTTCCCGATATCCGACGGTAGTGTNNNNNNNNGAAGTGGAAAGCTTTG	1187750	1187778	-	0	27095_0026
2:1241007-1241206/16,29/+	0.740613	2	1241007	1241022	1	TAGAAATCGGTCAAGA	1241178	1241206	1	CACACATCGGCTAAATGTTGAGACAATGA	1241023	1241177	TTTAAAATTATGAATCTCTTATCATCTTTGTTTGATTTTTTACCGGTTTTAAATCATCATATAATATATAAAGTTAAAAAGTCACAATTTTAGAAACAGATATATATATATATATATATATTACCCAATTGATAAAAAATGTGTGAGTTTAACGT	CACACATCGGCTAAATGTTGAGACAATGACTTCAGCTTCCCGATATCCGACGGTAGTGTNNNNNNNNTAGAAATCGGTCAAGA	1241122	1241143	+	0	27175_0052
2:1249206-1249385/17,28/-	0.840365	2	1249369	1249385	1	CTTTGGAGTCTAATAAG	1249206	1249233	1	GTCCAATTGATGAGGTTATTTAGAAGTC	1249234	1249368	ACACTAAAATCTAGCGATGAAGAACCAAAAAAACAAATGAGCGGTCTTTAGTTTAGCATAAGACTAAGAGGTTCTGTTTCGGCGACTCAAATTTAGGTTAAAGTGAATGGATACATATATATATATATATATATA	GTCCAATTGATGAGGTTATTTAGAAGTCCTTCAGCTTCCCGATATCCGACGGTAGTGTNNNNNNNNCTTTGGAGTCTAATAAG	1249234	1249258	-	0	27203_0072
2:1407607-1407786/19,26/+	0.972071	2	1407607	1407625	1	GTACATCTTTAGAAGCAAG	1407761	1407786	1	GCGTTGCTCCTTTATAATGGGATTGC	1407626	1407760	AATGTGTTTCGAGCTCATGTGAACAAGAAGAAGAAGAAGAAGAAACGAGAAGTTATGTGTTAGCTTCATTCTTCTTCTTCTTCTCTCTTCTTCTTTGTATCTTTGTTGGACTTTCACTTTTTACTTGTGGCTTGT	GCGTTGCTCCTTTATAATGGGATTGCCTTCAGCTTCCCGATATCCGACGGTAGTGTNNNNNNNNGTACATCTTTAGAAGCAAG	1407646	1407669	+	0	27434_0028
2:1533991-1534170/22,21/-	0.981574	2	1534149	1534170	1	GGATATAATAAAAATGGGGAAG	1533991	1534011	1	GTGGAGAGGTGTTTGCCTTGG	1534012	1534148	TTCTTGAGAAACCCGCCGTGAGTCGCAGCATCTCTTCTTCTTCTTCTTCCTCTTCTTTTAATCATATTATGGATGTCTTATACTGTTTCTTGCATGATTTGCAGAAAAAATGGTTTTGCTGTATACGCGCAGAATAA	GTGGAGAGGTGTTTGCCTTGGCTTCAGCTTCCCGATATCCGACGGTAGTGTNNNNNNNNGGATATAATAAAAATGGGGAAG	1534092	1534116	-	0	27604_0029
2:1612776-1612955/19,21/+	0.981813	2	1612776	1612794	1	GGGTTTTGGAAGGGGTTGG	1612935	1612955	1	CCGATGAGTCGCCGGAGGAAA	1612795	1612934	AGTTGGAGTGTAAGGGAATGATGGGTATGTTCTTCCGATTGTTGGTTGTGGTACTGAAAGACGATTAGGTCGATGTTGATGATGATGATGATGATGATGATCCACCATTGTTGTTGATGCGGAAGCTTTTGAGATTTTTC	CCGATGAGTCGCCGGAGGAAACTTCAGCTTCCCGATATCCGACGGTAGTGTNNNNNNNNGGGTTTTGGAAGGGGTTGG	1612866	1612895	+	0	27699_0030
2:1644542-1644721/16,29/-	0.976751	2	1644706	1644721	1	GAACCCGAGCAGAAGA	1644542	1644570	1	TTAAGTCAATTCGTCGTCATACCCACACC	1644571	1644705	GGATTGTTGTAGAATTGTCAAGAAGACGAAGAAGAAGAAGAAGAAGATTGGACGAAGAACAAGGACTTGAAGTTCCATACTTTTTGTGTCAAAAATGATTGAAACGAAATTGACAAAAGATGACTAACGAAAATT	TTAAGTCAATTCGTCGTCATACCCACACCCTTCAGCTTCCCGATATCCGACGGTAGTGTNNNNNNNNGAACCCGAGCAGAAGA	1644659	1644686	-	0	27749_0031
2:1676718-1676897/16,29/+	0.965824	2	1676718	1676733	15	AAAGAAACAAAATCAA	1676869	1676897	1	ACACCGCATAAGTTACATTACAACACACC	1676734	1676868	GAAGAGTGTTTATGGTTAAACAAAGCAAAAATGATCAAATAAAAACAAGATTATGATGTTGTTGTTGTAAAACGGCATAGTCAAGTCACAAGCGCACCACCAGACGGTGCCGCAACAACAACAACAACAACACCT	ACACCGCATAAGTTACATTACAACACACCCTTCAGCTTCCCGATATCCGACGGTAGTGTNNNNNNNNAAAGAAACAAAATCAA	1676846	1676865	+	0	27790_0032
2:1826375-1826554/20,25/-	0.888835	2	1826535	1826554	1	GGTGTATTGATGCTTGTTTG	1826375	1826399	1	CACTATTCATTATTTACATGCATGG	1826400	1826534	TTTTCCAATCAAAAATATACTTTTTGAACAGTTTTCAGTTTTCACACACACACACACACACATAAAAAGACATTTTAAGTGATGATTTATTGTTTACATTGCTAATTGTATTGATAAGATAAGTTATGGTCAATT	CACTATTCATTATTTACATGCATGGCTTCAGCTTCCCGATATCCGACGGTAGTGTNNNNNNNNGGTGTATTGATGCTTGTTTG	1826473	1826492	-	0	28043_0075
2:1832492-1832671/17,25/-	0.938723	2	1832655	1832671	1	CCAATTTGGTGATGAGG	1832492	1832516	1	AGGGTCCAGACTATAATCCAGAGGC	1832517	1832654	CGTGCGTATTAAAGTTTCGTTATGAGAAACTCAGGAATTTCTGTTCAGTATGTGGGATGATAGGTCACGAAGCATCAAAGTGCCCAACAACTAACAATATTCCACCGCCGCCACCAGCAGATGATGATGATGATGATG	AGGGTCCAGACTATAATCCAGAGGCCTTCAGCTTCCCGATATCCGACGGTAGTGTNNNNNNNNCCAATTTGGTGATGAGG	1832516	1832535	-	10	28047_0033
2:1865997-1866176/16,29/+	0.740409	2	1865997	1866012	1	CAGAATTGGTACTAAA	1866148	1866176	1	CAATATACGGTACCAAAGAAGTGGTGGCT	1866013	1866147	AAAATATGACATTGTTTGAAATAAATAAAAATGAAGAATATATATATATATATATATATATATATTTTTACAACTAAGAACTTTAGTTTTAGCTGTACAAGGGTAATTGGCAGAAAACTTTGAAAACTTTAAAAT	CAATATACGGTACCAAAGAAGTGGTGGCTCTTCAGCTTCCCGATATCCGACGGTAGTGTNNNNNNNNCAGAATTGGTACTAAA	1866050	1866077	+	0	28090_0076
2:2268723-2268902/20,25/+	0.838757	2	2268723	2268742	1	GTGCAAACAATTACATATTT	2268878	2268902	1	GGGTTTGGTTTGGACTGGTTTGAGT	2268743	2268877	AGTAATATACAATATTATTAATTAATTAATTAATTAATTAAGCAAAAAGTTTAATAATTCATATTGGTTAAACCAAACCGAACCGAACCATTTGGGTTGAGAAGAAACATAACCGAAAGGTTTGAGTCTAAGCTT	GGGTTTGGTTTGGACTGGTTTGAGTCTTCAGCTTCCCGATATCCGACGGTAGTGTNNNNNNNNGTGCAAACAATTACATATTT	2268756	2268783	+	10	28686_0034_SNP_a
2:2272166-2272345/17,28/+	0.959899	2	2272166	2272182	1	GATGATTGTGATGGAGG	2272318	2272345	1	AATAAAAAAAAGTGGTGGACACGTAAGG	2272183	2272317	AAGAAGAAGAAGAAGAAGAAGCCATGAGTGTGTGTGAATGATGGTGAAGTAGAGAAGAAGAGAGTGTGGGGAATAAGAAGAAGAAGAAGAAGAAGATAGGGAGAGAGAGAGAAAGAGTGATGGGATTAAAATAAT	AATAAAAAAAAGTGGTGGACACGTAAGGCTTCAGCTTCCCGATATCCGACGGTAGTGTNNNNNNNNGATGATTGTGATGGAGG	2272182	2272278	+	10	28691_0035_SNP_a
2:2355367-2355546/16,29/+	0.970241	2	2355367	2355382	1	GGGAGTGGCTTGGGTG	2355518	2355546	1	CGGTTGGATAAATTAGGGTTTGTTGCCGA	2355383	2355517	AGACAGATGGGATTTCGCGAGATCGAAGAATCGTCATGGAAATTGTAATCTGGAGAGAAAGGGAGAGAGGAGGGTTTATGAGGGTTTAGGTAGGAGAAGAAGAGGAAGAGGAAGAGGAAGAGGAAGAGGAAGGGT	CGGTTGGATAAATTAGGGTTTGTTGCCGACTTCAGCTTCCCGATATCCGACGGTAGTGTNNNNNNNNGGGAGTGGCTTGGGTG	2355474	2355514	+	0	28815_0037
2:2427868-2428047/18,26/+	0.980639	2	2427868	2427885	1	TATACTTGTGTGTGCGTG	2428022	2428047	1	CAGAAGAAACTGCAGAAACAGTACCA	2427886	2428021	TAATTTTGTTGCTTATAAACTATAATTGCAGTCAATATGTTCTGAAAAGTTGAAAGAGATCCTACAGAGAGAGAGAGAGAGAGAGAGAGCAACATGAAACCTAAAAACCCAAAAGAAAAATTAAAGTAAAAGGGAA	CAGAAGAAACTGCAGAAACAGTACCACTTCAGCTTCCCGATATCCGACGGTAGTGTNNNNNNNNTATACTTGTGTGTGCGTG	2427951	2427974	+	0	28894_0038
2:2460966-2461145/21,24/-	0.915463	2	2461125	2461145	1	GATTGTAAATCAAAACAAATA	2460966	2460989	1	GTGACGATAACTCGATGTATTGCT	2460990	2461124	TTTGTAAATGAAATACTAAAAAGAAATTAGGGAAAAAGAGAGAGAGAGAGAGAGAGAGAGAGAGAGAGAGAGAGAGAGAGAGAGAGAGAGAGAGAGAGAGAGAGAGAGAGAGAGAGAGAGAGAGAGAGAGAGAGA	GTGACGATAACTCGATGTATTGCTCTTCAGCTTCCCGATATCCGACGGTAGTGTNNNNNNNNGATTGTAAATCAAAACAAATA	2460989	2461088	-	10	28957_0040
2:2542182-2542361/18,23/-	0.980103	2	2542344	2542361	1	ACACCCAAAAAAAAGAAG	2542182	2542204	1	GTCCCGATGTCGAGCTTTTTGCT	2542205	2542343	GGTGATATTCTTTTGTGCAATATTCTTAATTTTTTTGTGTGTGTGAGTTACACGCTCTTCCCTATAACACACTCTCTCTCTCTCTCTCTCTCTCTCTCTCTCTCTCTCTCTCTCTCTCTCTCTCTCTCCGCCGAGTGAA	GTCCCGATGTCGAGCTTTTTGCTCTTCAGCTTCCCGATATCCGACGGTAGTGTNNNNNNNNACACCCAAAAAAAAGAAG	2542216	2542272	-	0	29052_0041
2:2574400-2574579/16,29/-	0.96947	2	2574564	2574579	19	ATTCTCTTCTCTGTTT	2574400	2574428	1	GTCAACCGGAGTCCAAGTCTTCCAGGGTA	2574429	2574563	CAATCCAACCCCTTCGCTTTCTAATTTCACCATTTCTAGATCTAGGGGTTCTTCATTCGTTATGGCTGCTGGTGGTAAGGGAAAATCAAGTAGAGGTAGAGGTAGAGGTAGAGGTAGAGGTCGAGTTCGCGAATC	GTCAACCGGAGTCCAAGTCTTCCAGGGTACTTCAGCTTCCCGATATCCGACGGTAGTGTNNNNNNNNATTCTCTTCTCTGTTT	2574439	2574474	-	10	29162_0042_SNP_a
2:2704171-2704350/19,26/+	0.950397	2	2704171	2704189	1	AGCTGAAACAAATACTGAA	2704325	2704350	1	GTAAGACGGGTTGTTCCTCCCTAGGC	2704190	2704324	ATGATCAAAAGCAAAAGCAAAAGCAAAAGCAAAAGCAAAATCAAATCCTAAGGAAAAAGTAACCCAGTGGGTTGCCTCCCACTTAGCGCGCTTGTTTAACGTCGTTGGCTCGACGTTTGGGTCTTACTAGGCGTA	GTAAGACGGGTTGTTCCTCCCTAGGCCTTCAGCTTCCCGATATCCGACGGTAGTGTNNNNNNNNAGCTGAAACAAATACTGAA	2704195	2704234	+	10	29415_0043_SNP_a
2:2758510-2758709/26,19/+	0.982311	2	2758510	2758535	1	GGTTTTATTACCTTTTCTGTTTTGGA	2758691	2758709	1	GCTCTATGTGATGTTTTGG	2758536	2758690	AAAATATCACTCTATGTTCTATGCTCTATGTTCTATGTTCTATGTTCTATGTTCTATGTTCTATGTTCTATGTTCTATGTTCTATGTTCTATGTTCTATGTTCTATGTTCTATGTTCTATGTTCTATGTTCTATGTTCTATGTTCTATGTTCTAT	GCTCTATGTGATGTTTTGGCTTCAGCTTCCCGATATCCGACGGTAGTGTNNNNNNNNGGTTTTATTACCTTTTCTGTTTTGGA	2758546	2758699	+	0	29488_0017
2:2763532-2763711/18,22/-	0.981275	2	2763694	2763711	1	AATGGCCTTGCGTGGAGG	2763532	2763553	1	GCTAAAGGGGTGTGGTTGGCTT	2763554	2763693	AATAGCCATTACCATTGTTGAAGAAACCATTAGAAAGAGAGCCATGAGAGCCCATGGAGATGAAGAAACAGTCATGGTTGTGTTTTAGAAAGAGATAGAGAGAAATGATGATGATGATGATGATGATGATGGTGAGAGAA	GCTAAAGGGGTGTGGTTGGCTTCTTCAGCTTCCCGATATCCGACGGTAGTGTNNNNNNNNAATGGCCTTGCGTGGAGG	2763559	2763589	-	0	29496_0046
2:2799692-2799871/18,27/-	0.961075	2	2799854	2799871	1	CAAAAGAGAAAAACGAGA	2799692	2799718	4	CACAGAAGCTTGCGGAAGGGCTTCAAG	2799719	2799853	TTAGCCTCTCCAAGCTTAGGTCTAAACAATAACCTAAAAACTATATATATATATATATATATATATATATATATATATATATATATATGTCTTAAAAACGTGATGATGGATAGATTTGAATGAATCGATGGATAT	CACAGAAGCTTGCGGAAGGGCTTCAAGCTTCAGCTTCCCGATATCCGACGGTAGTGTNNNNNNNNCAAAAGAGAAAAACGAGA	2799766	2799812	-	0	29538_0047
2:2849491-2849670/17,28/-	0.977671	2	2849654	2849670	7	TCGGTTTTGGGTTAGTC	2849491	2849518	1	ATTGTAACCGAGTAACAATCTTTGTGGC	2849519	2849653	AAAGCTTAGCACGTGAGACCCACACGTGAGTACGAATAAAACTGATTCTCAGCTTTATAACCCGAGCTCTGTTTTCTTCTGGGATTGATTCTATTGTGATAGAAAGTAGAGAGAGAGAGAGAGAAGAGAGAGATT	ATTGTAACCGAGTAACAATCTTTGTGGCCTTCAGCTTCCCGATATCCGACGGTAGTGTNNNNNNNNTCGGTTTTGGGTTAGTC	2849521	2849546	-	10	29598_0048_SNP_a
2:3092758-3092957/19,25/+	0.816122	2	3092758	3092776	16	AAACTCTCTCTCTCTCTCT	3092933	3092957	1	CTCTCTCCCCGTGCGTTCTCTTCTC	3092777	3092932	CTCTCTCTCTCTCTCTCTCTCTCTCTCTCTCTCTCTCTCTCTCTCTCTCTCTCTCTCTCTCTCTCTCTCTCTCTCTCTCTCTCTCTCTCTCTCTCTCTCTCTCTCTCTCTCTCTCTCTCTCTCTCTCTCTCTCTCTCTCTCTCTCTCTCTCTCTCT	CTCTCTCCCCGTGCGTTCTCTTCTCCTTCAGCTTCCCGATATCCGACGGTAGTGTNNNNNNNNAAACTCTCTCTCTCTCTCT	3092761	3092939	+	10	29911
2:3183121-3183300/16,26/+	0.983786	2	3183121	3183136	4	AGAGGAATGAGAAGAA	3183275	3183300	2	GAATCTGATGAGGACGAGGAGGATGT	3183137	3183274	GAAGAAAAACGTAAAGGATAAAGCTACGGCTAAGACCTGAATCTCCCGCAAAAAAAGCAGAAAGTCTATCACAATGAGGGTGTTCAATCTGGTGGAGGAGATGCACAAAAGAAGAAGAAGAAGAAGAAAGTAGCTGGT	GAATCTGATGAGGACGAGGAGGATGTCTTCAGCTTCCCGATATCCGACGGTAGTGTNNNNNNNNAGAGGAATGAGAAGAA	3183245	3183264	+	0	30041_0049
2:3209879-3210058/17,28/+	0.778448	2	3209879	3209895	1	CAAAACAAAAGGATCCA	3210031	3210058	2	GCTTGGCAAATCTGACCAAACATATGAT	3209896	3210030	TTTCATTAAATCCGTAAACAAATATATATATATATATATATATATATATATATATATATAAACTTTCACGATATAGTCAATTTAGCCAACATATACATTCTATATAACTTCCTATATAACCTTTGTAAGTCTTGA	GCTTGGCAAATCTGACCAAACATATGATCTTCAGCTTCCCGATATCCGACGGTAGTGTNNNNNNNNCAAAACAAAAGGATCCA	3209917	3209955	+	0	30141_0050
2:3560269-3560448/19,21/+	0.918428	2	3560269	3560287	2	GGCGGAAAAAATAAATCAA	3560428	3560448	1	CCCCCTCCATGGCGGTGTGTA	3560288	3560427	AAATAAAAGAAAAGAAAAGAAAAGAAAAGAATAATCAAACCAGTGGGTTACCTCCCACTAAGTGCTTGTTTTGAGTCAATAGCTTGACTTGGCAGAGTTCAGGATGTGGGTAGATTGGTGGAGGATTGTTGTTGCCTCCG	CCCCCTCCATGGCGGTGTGTACTTCAGCTTCCCGATATCCGACGGTAGTGTNNNNNNNNGGCGGAAAAAATAAATCAA	3560287	3560318	+	10	30313_0051
2:3702793-3702972/16,29/+	0.8932	2	3702793	3702808	3	TTAGAAATCCGAGTCT	3702944	3702972	2	GTCCTAAGTCACGAGCACCCTCTACAAGG	3702809	3702943	TATATATATATATATATATATATATCATACGAGAAATGGTTAGCAAAACGTATATAGTTTTCAGATCCTCTTTGAAAACCATATATAATATACTTAGTAAGAATTTACAAAAAGCCGTAAAACCTACATTGGTTC	GTCCTAAGTCACGAGCACCCTCTACAAGGCTTCAGCTTCCCGATATCCGACGGTAGTGTNNNNNNNNTTAGAAATCCGAGTCT	3702809	3702837	+	0	30490_0078
2:4103443-4103622/16,27/+	0.981597	2	4103443	4103458	2	GACGGCTCTCGAAGAA	4103596	4103622	1	CCGATCAGAGGCATCCTGAATAGACGG	4103459	4103595	CACTATACTAATCCTTACTTCTCAAATAAAGCTGAGGAAAACAATGAAATTGAAAGAAAAGAGAGAGAGAGAGAGAGAGAGAGAGAGAGAGAGAGAGAGAGAGAGAGAGAGAGAGAGAGAGAGAGAGAGAGAGGAAC	CCGATCAGAGGCATCCTGAATAGACGGCTTCAGCTTCCCGATATCCGACGGTAGTGTNNNNNNNNGACGGCTCTCGAAGAA	4103518	4103591	+	0	30940_0054
2:4165861-4166040/16,28/-	0.98132	2	4166025	4166040	11	AAGGTGAGAGATCGAA	4165861	4165888	6	GCTCGAAGAGAAATGACTCGATTTAGGG	4165889	4166024	GAAGATCGATCGATCTTAGCAGAAGAAGAAGAAGATCGATCTAGAAGGAGAAAGGATCGATCTTAGAAAGAGAATTGGGGATTAGGGTTTTCGAGACGAAGAAGAAGAAGAAGAAGAAGAAATGGGTAAGTGTTTG	GCTCGAAGAGAAATGACTCGATTTAGGGCTTCAGCTTCCCGATATCCGACGGTAGTGTNNNNNNNNAAGGTGAGAGATCGAA	4165904	4165931	-	0	31023_0055
2:4170467-4170646/18,26/-	0.980735	2	4170629	4170646	4	CAGCATCAATCCTCCACC	4170467	4170492	12	GCTTTCTCTGGATTTGAATGCCACTG	4170493	4170628	ACCACTCCACCCACATCCTGAACTCCGCCAAGTCAAGCTATTGACTCAAAACAAGCGCTTAGTGGGAGGCAACCCGTTGGTTAGATTTTTCTTTTCCTTTTCTTTTCTTTTCTTTTATTTTTGATTTTATTTTCCT	GCTTTCTCTGGATTTGAATGCCACTGCTTCAGCTTCCCGATATCCGACGGTAGTGTNNNNNNNNCAGCATCAATCCTCCACC	4170508	4170542	-	10	31036_0056_SNP_a
2:4316468-4316647/16,29/+	0.979244	2	4316468	4316483	1	CAGGAAGTGTTTCGAC	4316619	4316647	1	CCCAAGAAGAGACTGCAGACCCCGTCAAG	4316484	4316618	AACATTTTCAAGCAAACCAAGCCTATATACAAAAGGTTGTACAGGATGACGATATGCTTCGCAATAAAATAAATAAAAAGATTTAAGTGGCATATGGATTGAACTATATATATATATATATATATATATATATAT	CCCAAGAAGAGACTGCAGACCCCGTCAAGCTTCAGCTTCCCGATATCCGACGGTAGTGTNNNNNNNNCAGGAAGTGTTTCGAC	4316588	4316618	+	10	31230_0057_SNP_a
2:4564599-4564778/23,22/-	0.978031	2	4564756	4564778	16	TTCGTTTGTTTTAGTTTCTTAGC	4564599	4564620	1	GCAGAGTGTGGGTTCGCAACCT	4564621	4564755	CATTTGTTCTTGAGTAGCCTAGATGGTTAGAGGAGCTGGAGTTCGTGGTCGTGGTCGTGGTCGTGGTCGTGGTCGCGGTAGGCGACGAGTCCTCGAGGGTACCGGCGAGAATAATGGCCACAGTGCCACAGTTGA	GCAGAGTGTGGGTTCGCAACCTCTTCAGCTTCCCGATATCCGACGGTAGTGTNNNNNNNNTTCGTTTGTTTTAGTTTCTTAGC	4564677	4564713	-	0	31615_0058
2:4648472-4648651/16,29/-	0.969471	2	4648636	4648651	1	TTGAAGGGTGACTTTG	4648472	4648500	1	GAAGATGAAGTGTTGAAAATTTTGTCGAC	4648501	4648635	CAAATCAGAAAATTTGAAAATCAAATAGAATTGAGAGAGAGAAAGAGAGAGAGAGAGAGAGAGAGAGAGAGAGAGAGAGAGAGAGAGAGAGAGAGAGAGAGAGAGAGAGAGAGAGAGAGAGAGAGAGAGAGAGGA	GAAGATGAAGTGTTGAAAATTTTGTCGACCTTCAGCTTCCCGATATCCGACGGTAGTGTNNNNNNNNTTGAAGGGTGACTTTG	4648496	4648603	-	10	31714_0060_SNP_a
2:4928863-4929042/17,28/+	0.981171	2	4928863	4928879	10	TTGGGGATTAGGGTTTT	4929015	4929042	5	GCCTCGAAATTTTGAAGCCCAACTAATC	4928880	4929014	CGAGACGAAGAAGAAGAAGAAGAAGAAGAAATGGCTAAGTGTTTGGCTCAAAGAGAAATGACTCGATTTAGGGTTTTCAACACAATAGAAGTCGCATAATAGTCGCATAATTATCGCATATTCATTTGGATTTGG	GCCTCGAAATTTTGAAGCCCAACTAATCCTTCAGCTTCCCGATATCCGACGGTAGTGTNNNNNNNNTTGGGGATTAGGGTTTT	4928882	4928909	+	0	32108_0061
2:4996844-4997023/17,25/+	0.980938	2	4996844	4996860	1	TGGCGAAGTGGTGTATG	4996999	4997023	1	GACCATGACTTTTTCGGTTATGGGC	4996861	4996998	TTAATTAGTCCTTTTGAAACATTAGATGCAAAAGAATTAGTCTTGAACCCAACAAGAGAGAGAGAGAGAGAGAGAGAGAGAGAGAGAGAGAGAGAGAGAGAGAGAGAGAGAGAGAGAGAGAGATGTGTCATCATCTCC	GACCATGACTTTTTCGGTTATGGGCCTTCAGCTTCCCGATATCCGACGGTAGTGTNNNNNNNNTGGCGAAGTGGTGTATG	4996915	4996983	+	0	32189_0079
2:5022349-5022548/24,21/+	0.872801	2	5022349	5022372	9	CTGAGAGAGAGAGAGAGAGAGAGA	5022528	5022548	1	GAGTGCACAAAACTCACTATT	5022373	5022527	GAGAGAGAGAGAGAGAGAGAGAGAGAGAGAGAGAGAGAGAGAGAGAGAGAGAGAGAGAGAGAGAGAGAGAGAGAGAGAGAGAGAGAGAGAGAGAGAGAGAGAGAGAGAGAGAGAGAGAGAGAGAGAGAGAGAGAGAGAGAGAGAGAATCCTATCA	GAGTGCACAAAACTCACTATTCTTCAGCTTCCCGATATCCGACGGTAGTGTNNNNNNNNCTGAGAGAGAGAGAGAGAGAGAGA	5022351	5022518	+	10	32220
2:5051497-5051676/16,29/+	0.974888	2	5051497	5051512	2	TGGAGCTTCTTTTGGG	5051648	5051676	1	GTGTGTTTGCGCAATTTATGGGTTATCTT	5051513	5051647	CGAATATGAGTCCGTACTCGTAGCTTAGGGTCGGATCAAGGTCGGTTTTAGACAGCCATGAGAACCAATCCATCGTGTGTGTGTGTGTGTGTGTATCTGATGTTCTGTGAGTTTGGAGGACATTTGTATATATAT	GTGTGTTTGCGCAATTTATGGGTTATCTTCTTCAGCTTCCCGATATCCGACGGTAGTGTNNNNNNNNTGGAGCTTCTTTTGGG	5051587	5051606	+	0	32243_0064
2:5225636-5225815/26,19/-	0.96603	2	5225790	5225815	19	TTTTAGTTTCTTAGCCATTTGTTCTT	5225636	5225654	2	GCCACAATGCCACTATTGA	5225655	5225789	GAGTAGCGCAGATGGTTAAAGGAACTGGAGTTCGTGGTCGTGGTCGTGGTCGTGGTCGTGGTCGTGGTCGTGGTCGTGGTCGTGGTCGTGGTCGCGGTAGAGGACGAGTCCTCGAGGGTACCGGCGAGAGTGATG	GCCACAATGCCACTATTGACTTCAGCTTCCCGATATCCGACGGTAGTGTNNNNNNNNTTTTAGTTTCTTAGCCATTTGTTCTT	5225692	5225758	-	0	32502_0065
2:5230874-5231053/19,23/-	0.903462	2	5231035	5231053	20	GTTTGTGATATATTCGTTT	5230874	5230896	2	GCGAGAGTGATGGCCACAATGCC	5230897	5231034	ATTTTAGTTTCTTAGCCATTTGTTCTTGAGTAGCGCAGATGGTTAAAGGAACTGGAGTTCGTGGTCGTGGTCGTGGTCGTGGTCGTGGTCGTGGTCGTGGTCGTGGTCGCGGTAGAGGACGAGTCCTCGAGGGTACCG	GCGAGAGTGATGGCCACAATGCCCTTCAGCTTCCCGATATCCGACGGTAGTGTNNNNNNNNGTTTGTGATATATTCGTTT	5230922	5230976	-	0	32506_0066
2:5290816-5290995/16,29/+	0.986586	2	5290816	5290831	3	GAAACGAGAAAACAAG	5290967	5290995	1	CTTCGTTGTTGAGAACGGAGGGCAAGTTT	5290832	5290966	AAATCGAGAGATTGAGAGAAGGAGAAGAAGGAGAAGAAGGAGAAGAAGGAGAAGAAGGAGAAGAAGGAGAAGAATAAGAAAAGGAGATTAGGGTTGCAGTTACACTTAGAAGAAGGTGAAGAATAGATTAGGGTT	CTTCGTTGTTGAGAACGGAGGGCAAGTTTCTTCAGCTTCCCGATATCCGACGGTAGTGTNNNNNNNNGAAACGAGAAAACAAG	5290845	5290918	+	10	32577_0067_SNP_a
2:5456655-5456834/16,29/+	0.977965	2	5456655	5456670	14	AAAGAGAGAGATGAAG	5456806	5456834	1	GAATTAGGGTTCTTCATCAGTCGCTAATC	5456671	5456805	ATTCATTAGGGTGAATCGAAGAAACGAGAGAGAGAGAGAGAGAGAGAGAGAGAGAGAGAGAGAGAGAGAGAGAGAGAGAGAGAGAGAGAGAGAGAGAGAGAGAGAGAGAGAGAGAGAGAGAGGCGGAAGACAAAT	GAATTAGGGTTCTTCATCAGTCGCTAATCCTTCAGCTTCCCGATATCCGACGGTAGTGTNNNNNNNNAAAGAGAGAGATGAAG	5456696	5456792	+	0	32802_0068
2:5490616-5490795/18,26/+	0.980089	2	5490616	5490633	1	GGCTAAGGAGGTGCTTGG	5490770	5490795	1	GTGAGTTAAGAAGAGATCTCATGAGA	5490634	5490769	TCCTGTTATATATATGGCCTTTATGAAGAAGAAGAAGAAGAAGAAGAAGAAGAAGAAGGGCAGCTCGAATAAAGAGAGAGCTCATAAGAAGAAGCTGAAGGCAGGTCAAACACACATAAGAGAGAAAGCTCAAGAT	GTGAGTTAAGAAGAGATCTCATGAGACTTCAGCTTCCCGATATCCGACGGTAGTGTNNNNNNNNGGCTAAGGAGGTGCTTGG	5490658	5490691	+	0	32842_0069
2:5656364-5656543/18,23/-	0.94146	2	5656526	5656543	1	GATTGATCACATGTGGTT	5656364	5656386	1	AAGAACAAGACCGGTTTCTTCCC	5656387	5656525	AACATCAATCACAAAAAAAAACAAAGAGATAGAGATATGACTGAGGAGAGCCCAGAAGAAGATCATGGGTCTCCTGGAGTAGCTGAAACAAATCCAGGAAGCCCTTCTTCAAAGACCAACAACAACAACAACAACAACA	AAGAACAAGACCGGTTTCTTCCCCTTCAGCTTCCCGATATCCGACGGTAGTGTNNNNNNNNGATTGATCACATGTGGTT	5656386	5656409	-	10	33039_0070_SNP_a
2:5694395-5694574/19,26/+	0.980447	2	5694395	5694413	5	TTTGATCTCTCTCTCTCTC	5694549	5694574	1	CGTCTCGAAATTACACTCACTTTTGG	5694414	5694548	CCTTCTTCTTCTTCTTCTTCTTCCTCTCGTCGCCATTTTTTTTTCCTCTGTATCTGTTCATGCCCGACGCCTAACTGAGTCACCTCGTCTCTGCTTCAGGTGAATCTTCGTCGCTACTTCTCCGTTTTTGTAAAT	CGTCTCGAAATTACACTCACTTTTGGCTTCAGCTTCCCGATATCCGACGGTAGTGTNNNNNNNNTTTGATCTCTCTCTCTCTC	5694415	5694440	+	10	33085_0071
2:5736614-5736793/18,27/+	0.930298	2	5736614	5736631	1	CTACGGTAGTTTATCTTA	5736767	5736793	1	GCATGGTGGATCTATTCATGGTCATGT	5736632	5736766	TATTCCGTCTTCTTTTTCTTCTTCTTCTTCTTCAGATAATAATTATTACGATGATATAGAAAAGCAAGTGGTATCTCAAATTACTACTAACAATAATTTTCTTTGCTCTCAACACCTATATAACTCAGAAGGTTC	GCATGGTGGATCTATTCATGGTCATGTCTTCAGCTTCCCGATATCCGACGGTAGTGTNNNNNNNNCTACGGTAGTTTATCTTA	5736639	5736664	+	10	33137_0073_SNP_a
2:5799769-5799948/16,28/+	0.904859	2	5799769	5799784	1	CAAATCATGGAAGGGG	5799921	5799948	1	GAGGGTAAAAAAGTCCAAATAAAAAGGA	5799785	5799920	AGAGAGAGAGAGAGAGAGAGAGAGAGAGAGAGAGAGAGAGAGAGAGAGAGAGAGAGAGAGAGAGAGAGAGAGAGAGAGAGAGAGAGAGAGAGAGAGAGAGAGATTTCCTTTATTTCTAATTACGTTTCCTTGAATT	GAGGGTAAAAAAGTCCAAATAAAAAGGACTTCAGCTTCCCGATATCCGACGGTAGTGTNNNNNNNNCAAATCATGGAAGGGG	5799784	5799887	+	10	33254_0080
2:5833409-5833588/16,29/-	0.971199	2	5833573	5833588	1	ACGTGAGACAGACATA	5833409	5833437	1	GCTGCTGTCGGAATGAAGCAAATCATGGA	5833438	5833572	ATAGTTTGTGCCAATCTTTGATCGTTCACATGCACCACAATTAAATTGATCATAATCAAGTTCTTTACTATTGCACCAATAGATAGGGACAACTGGGAGCTTACAGATTACATCATCATCATCATCATCATCATG	GCTGCTGTCGGAATGAAGCAAATCATGGACTTCAGCTTCCCGATATCCGACGGTAGTGTNNNNNNNNACGTGAGACAGACATA	5833439	5833462	-	0	33326_0074
2:5864404-5864603/16,29/+	0.919409	2	5864404	5864419	1	CAACAGTCCCAAAGAG	5864575	5864603	1	GGAGGGTCACAGAGAGGAGGATTAGAAGG	5864420	5864574	CACCATCTGCACCATCTGAACCACCTGCACCACCTGCACCATCTGCACCATCTGCACCATCTCAACGAGTTTCACCAAGAGGAGTAGCACAGAGAAGAGGGTCACAGAGAGGAGTGTCAAGTAGAGGAGGATCGCAGAGAAGAGGATCACAGAGA	GGAGGGTCACAGAGAGGAGGATTAGAAGGCTTCAGCTTCCCGATATCCGACGGTAGTGTNNNNNNNNCAACAGTCCCAAAGAG	5864419	5864481	+	10	33358_0057
2:5892412-5892591/16,29/+	0.76306	2	5892412	5892427	3	GAACTCCGGGATATTG	5892563	5892591	1	CTCAGGTTATGAACTTATTCATAAACTGC	5892428	5892562	TAGAATTGAAGGCAGTCGTGCCTAGTTTGGTATGATATATATATATATATATATATATATATATATATATGGCAGATTTAAATAAACAGCTATTTATTTTCATCTATGAAGAATCCTTAACTCCATTTACTCTTT	CTCAGGTTATGAACTTATTCATAAACTGCCTTCAGCTTCCCGATATCCGACGGTAGTGTNNNNNNNNGAACTCCGGGATATTG	5892458	5892497	+	10	33403_0078_SNP_a
2:5922830-5923009/17,27/-	0.980821	2	5922993	5923009	1	CACATACAAAGGAAGAG	5922830	5922856	1	GTGGACGAGAAGTGACAGCGATGGCAC	5922857	5922992	ATCTAGAATCGAACAGTGGTTGGGCCAAAGCAGCTAAGACACATAACTCTTTCCATGGAAGCTTCAGATTTAGGCATAGGATGATTCTCCTTGACTAAATCAGCCGAAGAAGAAGAAGAAGAAGAAGCGGAGGAAG	GTGGACGAGAAGTGACAGCGATGGCACCTTCAGCTTCCCGATATCCGACGGTAGTGTNNNNNNNNCACATACAAAGGAAGAG	5922866	5922887	-	0	33424_0079
2:5981632-5981811/22,23/+	0.978203	2	5981632	5981653	1	ATTCGAGTACAAGAGAATCGAG	5981789	5981811	1	GCTGACTCGATGTTGATCGGGTG	5981654	5981788	ATTTTTACCAGAAATTCGAAGCAGCATCGTTGTTGTTGTTGTTGTTGTTGATGATGATGATCGGAGTTTGGTGTTGTCGTCTGCTTCTTTGTATAAGCGTCTCCTTTTGGTTTTGGATTTGAGTGATGAGTGAAT	GCTGACTCGATGTTGATCGGGTGCTTCAGCTTCCCGATATCCGACGGTAGTGTNNNNNNNNATTCGAGTACAAGAGAATCGAG	5981682	5981703	+	0	33544_0080
2:6044203-6044382/17,23/+	0.945581	2	6044203	6044219	7	CCCAAAATAAATAAAAT	6044360	6044382	7	CATAAGGTCTTGGAGGTGGAGGT	6044220	6044359	CTCTCTCTCTCTCCCTCTCTCTCTCTCTCTCTTCATGATTTGTAGCGCCTCTCTTTCTCCACGTCTCCATAACTTTTGAGAGAAGTTTCTTAAACAATTCGATCTCGATTATCTCAGGAATTTGGTAAAAGTTTTATGTC	CATAAGGTCTTGGAGGTGGAGGTCTTCAGCTTCCCGATATCCGACGGTAGTGTNNNNNNNNCCCAAAATAAATAAAAT	6044219	6044251	+	10	33633_0081_SNP_a
2:6056599-6056778/16,27/-	0.965509	2	6056763	6056778	1	ATGTGTTGGGAGGCTG	6056599	6056625	1	GACAGTGTGGTGATAGAGGACAAGGTT	6056626	6056762	CAAGGACAAGAATTCCTCCGACTAGGGAGAGGCGTTTGACCCAAAGACGCAACTTGGGCTGCCCTGCCAGTCATGGAGGAGGAGGAGGAGGAGGAGGATCAATGAAAACACCACGGCCTACAATGAGTTTGATACAT	GACAGTGTGGTGATAGAGGACAAGGTTCTTCAGCTTCCCGATATCCGACGGTAGTGTNNNNNNNNATGTGTTGGGAGGCTG	6056665	6056688	-	10	33659_0082
2:6296513-6296692/16,29/+	0.750122	2	6296513	6296528	2	GGGCTTAAACTAGGTT	6296664	6296692	2	ACCTAAATTCTGACACAACTGTAACACAC	6296529	6296663	TAGCTTTATGAGATTAGGATTAATGTACCCTAAATCCTATATATATATATATATATATATATATATATATATATATATATATATATGTAGCCACAAAGATGAATAACACAATAACACAAAATTTCTAGTATCTAA	ACCTAAATTCTGACACAACTGTAACACACCTTCAGCTTCCCGATATCCGACGGTAGTGTNNNNNNNNGGGCTTAAACTAGGTT	6296566	6296614	+	10	33993_0082_SNP_a
2:6495659-6495838/21,24/+	0.873295	2	6495659	6495679	1	GGGATAGAAGTTGGATTGAGG	6495815	6495838	1	AAATATGCCTAATTCTGCAAAAGC	6495680	6495814	AAAGAAGAAGAAGAAGAAGAAGATATCATACAAGGGAAAAATCGTTAATCTATGAGATGAAAAATGCTCATCCTTATAAGCCTAATCCGAAAATGTTTTTATATATATATATATATATATATAATTTTTGGGACA	AAATATGCCTAATTCTGCAAAAGCCTTCAGCTTCCCGATATCCGACGGTAGTGTNNNNNNNNGGGATAGAAGTTGGATTGAGG	6495681	6495702	+	10	34271_0083_SNP_a
2:6618809-6618988/16,27/+	0.980909	2	6618809	6618824	1	ATTAGCTCGGGATGAA	6618962	6618988	1	GCGTTTTTCCTTTTGGTTATTTTCGGG	6618825	6618961	GAAGATGAAGAACGAGATCTGGAAGTTGTGGGCAACATCTTCTCCTCCCTTGTTTCTGATCCAGATTTTGATTCTTCTTCTTCTTCTTCTTCTTCAGATCGTTTTGATTCGAAAGATCTCTCTGGTTCGAATTCTCT	GCGTTTTTCCTTTTGGTTATTTTCGGGCTTCAGCTTCCCGATATCCGACGGTAGTGTNNNNNNNNATTAGCTCGGGATGAA	6618896	6618919	+	0	34558_0084
2:6738398-6738577/16,28/-	0.930937	2	6738562	6738577	1	TGGCGAGTTTAGAGGC	6738398	6738425	1	TCATATAACGTAGAAGTACCTAAATTTG	6738426	6738561	AGTAGATTCTATGCCGAGAGAGAGAGAGAGAGAGAGAGAGAGAGAGAGAGAGAGAGAGAGAGAGAGAGAGAGAGAGAGAGAGAGAGAGGTACTACAAGGAGATGAAACTCAATTAAATTGAAGGGTAAAACAATCA	TCATATAACGTAGAAGTACCTAAATTTGCTTCAGCTTCCCGATATCCGACGGTAGTGTNNNNNNNNTGGCGAGTTTAGAGGC	6738474	6738546	-	0	34829_0086
2:6793152-6793331/16,28/+	0.883456	2	6793152	6793167	1	ATCTTACCCACATAAC	6793304	6793331	1	GGAGCTCGAGTTTTGAGACGTTGTCTTG	6793168	6793303	CATATATATTGGTTAATGGTTATTATATATATATATATATATATGGTTATGTGGGTGAGCCGGACAAAAACAAAAACTCACTTTAAAATTTAGATAATTTTGAAGTTTTTGGTGATTTAGCATTCATATTATGGTT	GGAGCTCGAGTTTTGAGACGTTGTCTTGCTTCAGCTTCCCGATATCCGACGGTAGTGTNNNNNNNNATCTTACCCACATAAC	6793188	6793211	+	0	34890_0090
2:6880744-6880923/24,19/+	0.994484	2	6880744	6880767	16	CTTCTTCTTCTTCTTCTTCCTCTT	6880905	6880923	1	TGGTGTGAATCTCTGTCTC	6880768	6880904	GCTTTCTTGAAACCGAAACAAAGACGAGACAGAGAGAGAGAGAGAGAGAGAGAGAGAGAGAGAGAGAGAGAGAGAGAGAGAGAGAGAGAGAGAGAGAGAGAGAGAGAGAAAGAATCAGAGGAAGAGACAAAGAACAA	TGGTGTGAATCTCTGTCTCCTTCAGCTTCCCGATATCCGACGGTAGTGTNNNNNNNNCTTCTTCTTCTTCTTCTTCCTCTT	6880789	6880880	+	0	35001_0091
2:6947248-6947427/27,18/-	0.951062	2	6947401	6947427	1	CAATGGATTTCTAGTGTTTATCTTCTC	6947248	6947265	1	GGGCCTTTTGGTCTTTTG	6947266	6947400	ACTCATCTTCTTCATCTCTCCCACCCAAAGCTCCATAGCTTTTGCCATTCTTTCCTTTTGTTGATCTTAATATCTCATTATGAACGAGAGAGAGAGAGAGAGAGATGCATGTGAGCTTTATGTAGACAAAGAATA	GGGCCTTTTGGTCTTTTGCTTCAGCTTCCCGATATCCGACGGTAGTGTNNNNNNNNCAATGGATTTCTAGTGTTTATCTTCTC	6947296	6947315	-	0	35091_0092
2:7039730-7039909/19,26/-	0.944324	2	7039891	7039909	1	GGGAGCTGGAGGCAGAGTG	7039730	7039755	1	CGTCGAGAAGACGGCAATCTAGTGAG	7039756	7039890	CGTCGGATGTAACAGCTGTTCAAGCGGGAGCAACAACAAGCGGTGGTGGTGGTGGTGGTGGTGGTAATGGTTTGAGAAACTCGGGGTCGCAAGGAAGTAGCGGAAGGAACAATAACAACAACGGGAATTCATCGT	CGTCGAGAAGACGGCAATCTAGTGAGCTTCAGCTTCCCGATATCCGACGGTAGTGTNNNNNNNNGGGAGCTGGAGGCAGAGTG	7039826	7039849	-	0	35201_0093
2:7075045-7075224/16,29/+	0.972264	2	7075045	7075060	2	GGTAGTGAAGTGAAGT	7075196	7075224	1	CGTCTTTCCATGAAGATGTTGGTTCAAGC	7075061	7075195	TTCATGATGGTGAGACCAATTGCTCTAAGCAGTTGATAAGACCTGAAGATGAGAATCATGGAGTCGAGGTCTTGCCGTTTCCTATGTTCAAGGTTTCTCAAAAGAGAGAGACTACTACTACTACTACTACTAAAC	CGTCTTTCCATGAAGATGTTGGTTCAAGCCTTCAGCTTCCCGATATCCGACGGTAGTGTNNNNNNNNGGTAGTGAAGTGAAGT	7075171	7075192	+	0	35243_0094
2:7186948-7187127/17,28/+	0.771396	2	7186948	7186964	2	GAGAGAATCTTCTGGTT	7187100	7187127	1	GGCAAAAGTCATTAGAAGTTATAACCAT	7186965	7187099	GTTGGAGAGAGAGAGAGAGAGAGAGTTGGGTGGATATTGAAGGAGGAGGTGTAAATATTTATAAAGGCATGCATGTGTTGTGTAATGTCTATGTGTCTAAGTGAAAAAGTGAGATATATGTGTGGAAGCCACAAT	GGCAAAAGTCATTAGAAGTTATAACCATCTTCAGCTTCCCGATATCCGACGGTAGTGTNNNNNNNNGAGAGAATCTTCTGGTT	7186969	7186989	+	10	35379_0095_SNP_a
2:7228741-7228920/16,29/+	0.927866	2	7228741	7228756	5	TTCTTCTCACCTCCAC	7228892	7228920	2	CTCTGATCTTTATTATGAACGATTACATG	7228757	7228891	TGTCGGGTTCGGGATCGGGTTCGTGTTCGTGTTCGTGTTCACGTTCGCAGGAGCTCCAACCATTGTCACTCTTCGTTTCAAAAGAAAATCAAAATTGATTTCTCAAGCTCTGATACCATGAAATAAACAGAGTTT	CTCTGATCTTTATTATGAACGATTACATGCTTCAGCTTCCCGATATCCGACGGTAGTGTNNNNNNNNTTCTTCTCACCTCCAC	7228759	7228796	+	0	35425_0096
2:7324418-7324597/20,25/-	0.975997	2	7324578	7324597	1	GTTGTTCAGGCTGATCGTGG	7324418	7324442	1	CAATGGTTACGAGGAGGGAGTGGAG	7324443	7324577	GAAACCCTTATCACCACGACCTCAAGGGCATGAACACAGTGGCAAGAATGACACAGCCAGTGAGATTAGTTTGTTTAATGTTGTAAGCCCTCCAAGATCATGCGCCAATGATGATGATGATGATGATGATGAAAA	CAATGGTTACGAGGAGGGAGTGGAGCTTCAGCTTCCCGATATCCGACGGTAGTGTNNNNNNNNGTTGTTCAGGCTGATCGTGG	7324446	7324470	-	10	35544_0097_SNP_a
2:7338783-7338962/27,18/+	0.982174	2	7338783	7338809	1	CCCTACATTTGTTGATGTACCAGGGTC	7338945	7338962	1	TCCTCCAAGCTAACACAG	7338810	7338944	ATCTTGCTCATGCTCCATCTAGAAAAAAAAATGCCAAAGCAAAAGTTTTGATGAGAGAGTAGTGCAAAAATAATGAAAATAACCTACAAGAGAGTAAGGATCTAAAACTATGATGCAACAACAACAACAACAACA	TCCTCCAAGCTAACACAGCTTCAGCTTCCCGATATCCGACGGTAGTGTNNNNNNNNCCCTACATTTGTTGATGTACCAGGGTC	7338925	7338944	+	0	35556_0098
2:7340897-7341096/21,24/+	0.707577	2	7340897	7340917	18	TAAAAAATAAATTGTTTCCGC	7341073	7341096	1	GTTCGGTTCGGCTCTCTTTTCTCC	7340918	7341072	GGTATACCGCGGGTTAAAATCTAGTATATTTACATTATTTACAATATTATTAATATAATTAATTAATTAATTAATTAAATATATTGGGTTATCGAAAACCGAACCGAACCTACCTATTTGGGTTGAGAAAAAATACAACCGAATGGTTTGGTTTG	GTTCGGTTCGGCTCTCTTTTCTCCCTTCAGCTTCCCGATATCCGACGGTAGTGTNNNNNNNNTAAAAAATAAATTGTTTCCGC	7340963	7340995	+	0	35559_0061
2:7445165-7445344/21,23/-	0.953007	2	7445324	7445344	1	TGGGTGTTCCGGATTTAGAGG	7445165	7445187	1	GACTAGGCCAAGTGTGTCAGTTG	7445188	7445323	AAGATGATGTAGTTGTTAAGGAAGTACATGGGAAACAGAAATTTGTAGCTGCAGTTTCTGTGGAAGAGCCGTTAGGTAACTCCGGTGCTAGCACTAGCGGAGGAGGAGGAGGAGGAGGTAAGGCTTCTTTGTATCA	GACTAGGCCAAGTGTGTCAGTTGCTTCAGCTTCCCGATATCCGACGGTAGTGTNNNNNNNNTGGGTGTTCCGGATTTAGAGG	7445206	7445225	-	0	35655_0100
2:7450655-7450834/21,23/-	0.961335	2	7450814	7450834	1	GATGCATTTGTTCGTGACTTG	7450655	7450677	1	GGCAGACTAGGGCTCCTAGTTAT	7450678	7450813	ATTGAAAGTGAAAAAGGAAATGTTGCATCATCATCATCATCATCATTACCTCAGAGGGAGACTAGGTTGCCTAATGAGAATGTTCCTGTTATTTCGAATATTAAATCTGTGTCTTTACCTGTTGAAAGGACTAAGA	GGCAGACTAGGGCTCCTAGTTATCTTCAGCTTCCCGATATCCGACGGTAGTGTNNNNNNNNGATGCATTTGTTCGTGACTTG	7450768	7450788	-	0	35661_0101
2:7568129-7568308/20,25/-	0.98002	2	7568289	7568308	1	CCATAGCCACTGAGAAGAAA	7568129	7568153	1	TGCAGACGACGGCGACTGCCCAAGT	7568154	7568288	CAAATTCATATGTTTCAGACAATGAATGTTTGAACAAGAACACTCGTAAGAAAAGAAGAAGAAGAAGAAGAAAGCAGACGTTGGCGAGTCTTTGAAGACCCTTTTCAAGGAGATGGGAAATGAGGATGAGAAAGG	TGCAGACGACGGCGACTGCCCAAGTCTTCAGCTTCCCGATATCCGACGGTAGTGTNNNNNNNNCCATAGCCACTGAGAAGAAA	7568217	7568241	-	0	35760_0102
2:7648331-7648510/21,24/+	0.941819	2	7648331	7648351	1	ACCCATTTGCTTAATCTTCAA	7648487	7648510	1	GCAAGGAGCATTTTCAGTGAACCC	7648352	7648486	CTCTCTCTCTCTCTCTCTCTTTCTTTTTAACACTTTAAACTTGGATGAATTTGAATTTCAGGCAGCTTACCTGGATCAAGCTAGTAAAACATCTCTATCAAGTTCCTTGATGCTAGTGGTACGTGATATCTTCTT	GCAAGGAGCATTTTCAGTGAACCCCTTCAGCTTCCCGATATCCGACGGTAGTGTNNNNNNNNACCCATTTGCTTAATCTTCAA	7648352	7648375	+	10	35831_0103
2:7653119-7653298/18,27/-	0.85293	2	7653281	7653298	1	GCTAGTTAATTTTTGTTG	7653119	7653145	1	GCCAAGAAGAGACGATATCTTATGGCG	7653146	7653280	ACACATATATATATATATATATATATATATATATATATATATATAGACACTCGTATTTGATCTTGATCATAACAATAAAAAGAAGACAATACTAGAGAAAGAAAAAGAGATCTAAAGAGTAAAAAATGTCTTATG	GCCAAGAAGAGACGATATCTTATGGCGCTTCAGCTTCCCGATATCCGACGGTAGTGTNNNNNNNNGCTAGTTAATTTTTGTTG	7653236	7653276	-	0	35839_0104
2:7723126-7723305/16,29/-	0.957936	2	7723290	7723305	1	AGAGAGCCATAGAGAG	7723126	7723154	1	GCCGATGGTAGTGAAGTGAACCAAGGTTG	7723155	7723289	CAGTGACAATGGTGGAAGAGGAAGGTGGTGGTGGTGGTGGTGGTGGTTGATTCAGAGGCATGTTGAGGAAATCTTGAAAGATGGAGTTATTAGGGTTTTGGTTCTTTAACATTGGTTCATGACCAATGTTTAGTT	GCCGATGGTAGTGAAGTGAACCAAGGTTGCTTCAGCTTCCCGATATCCGACGGTAGTGTNNNNNNNNAGAGAGCCATAGAGAG	7723243	7723266	-	0	35885_0105
2:7732808-7732987/18,26/-	0.979994	2	7732970	7732987	2	ACAAAGAATCACACATAA	7732808	7732833	1	GCAATGCGTGTACTTCGGCTTCAGGA	7732834	7732969	TTCTGAGTTTCTTAAGTTTCAAGGCTACTCTAAAATACTTGGGAAAACTATATGTTGGTCATGTTAACCACTCTCTCTCTCTCTCTCTCACTCTCTCTCGACCAACTTTGTTGAAATCAGAACGGGACAGTGAATG	GCAATGCGTGTACTTCGGCTTCAGGACTTCAGCTTCCCGATATCCGACGGTAGTGTNNNNNNNNACAAAGAATCACACATAA	7732871	7732899	-	0	35896_0106
2:7804662-7804841/16,29/+	0.957072	2	7804662	7804677	2	CACAAGTAAGTAACTC	7804813	7804841	1	GTGGGCAATTTGGTCAAGATATAGATGTG	7804678	7804812	GTTAAGACACATCACTACATATGTCAGTGATCTAGACCATATGATAGGAACATATATACGTTCAAATACTTTATTCAAACAATTGGTAACTTGATTCATTCTCTCTCTCTCTCTCTCTCTGGGTTCAAAATGAAG	GTGGGCAATTTGGTCAAGATATAGATGTGCTTCAGCTTCCCGATATCCGACGGTAGTGTNNNNNNNNCACAAGTAAGTAACTC	7804777	7804797	+	0	35938_0107
2:7860376-7860555/17,23/+	0.96184	2	7860376	7860392	1	GGGGCGGAGAACAAACG	7860533	7860555	1	GAGTGGGTTCTTGTCAATCCATG	7860393	7860532	TCTAAATATTTAAGGTTACAATGATAAATACTCATTCTTGTGCCTATATATATATATATATATATATATATATATATATATATTACTTCGTAATTTCGTATAATAGTTGATGATAAAATAAATTACTTCGTATAGTCATA	GAGTGGGTTCTTGTCAATCCATGCTTCAGCTTCCCGATATCCGACGGTAGTGTNNNNNNNNGGGGCGGAGAACAAACG	7860437	7860475	+	0	35997_0108
2:7879477-7879656/18,27/-	0.876888	2	7879639	7879656	1	TGCTCCGATTTACATTAC	7879477	7879503	1	TTCATGCAGTTTCACCGATCCCCAACC	7879504	7879638	CATTGGAGATGGAGGCAACATAGAAGGAATCGCTAACAGGTAAACAAAATCTTTATATATATATATATATATATATATATAGTGATTTTGATTAAAGCTTTTGTTTGTAAATTGTTTAACTAAGATTATTTATTT	TTCATGCAGTTTCACCGATCCCCAACCCTTCAGCTTCCCGATATCCGACGGTAGTGTNNNNNNNNTGCTCCGATTTACATTAC	7879558	7879585	-	0	36021_0109
2:7897820-7897999/17,28/-	0.727771	2	7897983	7897999	1	GGTTTGTTTATGCTTCG	7897820	7897847	1	GAACTTCTAGATAACATGTCAAATCTAC	7897848	7897982	AGAAAAGCAACTTTTTGGATTGGTAATTTTTAAGAATGAAAAAAATCACATTTTGGATTGATGATTATATATATATATATATATAAGCTGCATTTACAATTAAGTTTTGGTTTTTCTGCAAATAACAATAAAAAG	GAACTTCTAGATAACATGTCAAATCTACCTTCAGCTTCCCGATATCCGACGGTAGTGTNNNNNNNNGGTTTGTTTATGCTTCG	7897898	7897917	-	0	36040_0110
2:7909796-7909975/18,27/+	0.920353	2	7909796	7909813	1	GGATCTGAATTGAGATTG	7909949	7909975	1	GAAGCTTTGGTTACTTCTTTTCGTTTT	7909814	7909948	CTTCTTCATAGCTAAAACAAGAAGAGATAAGAGAGAGAAGAGTTAGGAAGTGGTGAGACCCATACGGGGAATGGAATGTTAGGGGAAGAGGAAGAAGAAGAAGAAGAAAGGAAGCAAAATACGTTGGTTGATGAA	GAAGCTTTGGTTACTTCTTTTCGTTTTCTTCAGCTTCCCGATATCCGACGGTAGTGTNNNNNNNNGGATCTGAATTGAGATTG	7909898	7909921	+	0	36053_0111
2:7914311-7914490/24,21/+	0.975455	2	7914311	7914334	1	TCCTTTCGCTTTTCCTTTTCCACC	7914470	7914490	1	GCTAACTACTCCACGAAGGAC	7914335	7914469	TTTCTTCTTCTTCTTCGTCTTCTTCAAATCATTGGTAGAAGAAACATTGTGTTTATCGTCACCATCAAGTTTTCTACAAGTAGAACCTTCCAGCTCCTTGGTTTTGCTTATCTCGACCTTTCTATTCTCAACAAA	GCTAACTACTCCACGAAGGACCTTCAGCTTCCCGATATCCGACGGTAGTGTNNNNNNNNTCCTTTCGCTTTTCCTTTTCCACC	7914336	7914359	+	10	36055_0112_SNP_a
2:8158308-8158487/16,28/-	0.95999	2	8158472	8158487	1	AGCGGTGGAAGATTCG	8158308	8158335	1	GTCTGATTGAGACGATGGATGAAGCGGT	8158336	8158471	ATTGCATAAACGGAGAAGAAGAAGAAGAAGAAGATACTGGAATCGAAGGTCTGGTTGGGCTCGGTGGACGAGCGGCGAGAACGGTTCCGGGACCTGATTGGACGCTTTCGTTAATCAGATTCTCGATCTCGTCAAT	GTCTGATTGAGACGATGGATGAAGCGGTCTTCAGCTTCCCGATATCCGACGGTAGTGTNNNNNNNNAGCGGTGGAAGATTCG	8158438	8158458	-	0	36267_0114
2:8220837-8221016/17,28/-	0.752459	2	8221000	8221016	1	GTTACTCATTTTGAAGG	8220837	8220864	1	GTGTGTAGATACTAACTTTATAATTCCC	8220865	8220999	AAAAAAAAAACAAACAAAATTTAAAATACATACATGGATTTGTGAATATACATATATATATATATATATATATATAGAGAGAGAGAGAGAGAGAGAGAGAGAGTAATATAGATATAACATGTATATTTGATATAT	GTGTGTAGATACTAACTTTATAATTCCCCTTCAGCTTCCCGATATCCGACGGTAGTGTNNNNNNNNGTTACTCATTTTGAAGG	8220897	8220924	-	0	36330_0115
2:8222849-8223028/17,28/-	0.951159	2	8223012	8223028	1	GATGAAGAGTGGCGTTG	8222849	8222876	1	CTCCATGAAAGGTGGCTACTTTCCGGCG	8222877	8223011	ACTCAAGTTGTGACAATGAAAGGTGAAAAGAATCTGGCAGTGGAGGATAGAGGGACCACCACCACCACCACCACTACTACTACTACTTCAATGCACGTGTTATGGAACGTGTAACACACGCGCCTGCGGGATTCC	CTCCATGAAAGGTGGCTACTTTCCGGCGCTTCAGCTTCCCGATATCCGACGGTAGTGTNNNNNNNNGATGAAGAGTGGCGTTG	8222938	8222957	-	0	36333_0116
2:8259159-8259338/16,29/-	0.810198	2	8259323	8259338	1	TCCTATTAGCTCAATA	8259159	8259187	1	CAGAGATGAGATCTTTAAGTTTCTTGTTG	8259188	8259322	ATGCAGTGAGTTTAATATATATATATATATATATAGCGTACTTACCTAAAATGAAATACTCAATAGGATTTTGGCTGCTGAAAAGATCAACAAAGGTGAACTTAGCATGATCAACAACACTGATTCTGTTGAATT	CAGAGATGAGATCTTTAAGTTTCTTGTTGCTTCAGCTTCCCGATATCCGACGGTAGTGTNNNNNNNNTCCTATTAGCTCAATA	8259288	8259308	-	0	36362_0117
2:8296099-8296278/16,29/-	0.97146	2	8296263	8296278	1	TAACTAAGCAGAAGAG	8296099	8296127	1	GATCTTGGAAAAGGCGGTGGATTCACTTC	8296128	8296262	TTATCGTTGGTCATTTTCTTGGAAGAAGAAGAAGAAGAAGAATGCTTGTGATTCTGTGAAGAATTATGGCTTGACGAAGATGACGACTCAGTAAAGAAGACCACGTCTTCATCGGAAACGACTAAAGCTTGAATT	GATCTTGGAAAAGGCGGTGGATTCACTTCCTTCAGCTTCCCGATATCCGACGGTAGTGTNNNNNNNNTAACTAAGCAGAAGAG	8296221	8296241	-	0	36390_0118
2:8361799-8361978/16,29/+	0.970699	2	8361799	8361814	1	ATAGAGACGAAGCGGA	8361950	8361978	1	GCCGTCGCCGAGATATGTCGGAGTATTTG	8361815	8361949	AGGTTCTGAGGATTTTACAGTGAAAGCTTCTCGACGTGGTTGAAGATCTTCTTCTTCGTCCGACGAAGCGTAGCTCGCTACCAGAGAGTCCATTGCAGAGAGAGAGAGAGAGAGAGAGAGAGAGAGGAAGACTTA	GCCGTCGCCGAGATATGTCGGAGTATTTGCTTCAGCTTCCCGATATCCGACGGTAGTGTNNNNNNNNATAGAGACGAAGCGGA	8361911	8361940	+	0	36439_0119
2:8527250-8527429/16,29/+	0.955394	2	8527250	8527265	1	AAAAAACGAATCGGAA	8527401	8527429	1	GGCGAAATCGTCCGTAAATGCCTCGCTCG	8527266	8527400	GAGAGAGAGAGAGAGAGAGATTGGAGCTAGTTGGAGATGGGAATAAGGTTCATATTGATGGTGAACAAGCAAGGCCAGACTCGTCTTGCTCAGTACTACGAATGGCTCACTCTCGAGGAACGTCGCGCTCTCGAA	GGCGAAATCGTCCGTAAATGCCTCGCTCGCTTCAGCTTCCCGATATCCGACGGTAGTGTNNNNNNNNAAAAAACGAATCGGAA	8527265	8527285	+	10	36573_0121
2:8570963-8571142/16,29/-	0.983256	2	8571127	8571142	3	ATCCAAAATCACAAAA	8570963	8570991	1	CACTTGTCTCAATTTGGCAATTGGCGTTG	8570992	8571126	TTAATAAGGAAGAAGAAGAAGAAGAAGAGAAAAATACCCAGAAGGAAGATTATCAACGTAGCTAATAAGCATCTTAAGCTTGCTGCCACCTTCAGAAGCAAGACCAGCATGCATCTCAACAGTCATAGCATCAGC	CACTTGTCTCAATTTGGCAATTGGCGTTGCTTCAGCTTCCCGATATCCGACGGTAGTGTNNNNNNNNATCCAAAATCACAAAA	8571096	8571118	-	0	36627_0122
2:8591233-8591412/16,29/-	0.952241	2	8591397	8591412	2	ATTGTGTGTCGTCGGG	8591233	8591261	1	CAATAGACAAGCTTTCAATCTTCAATTGC	8591262	8591396	AATCTTCAATCCGACCAAAATCACCAGAAAACTTGATCTATCAACATGTCTCAAACTTCGCCCAAAGAAATCATGGCGAGATTCCAATTTTAGCTTTGATGAGAATCTTTGAATTTTCTTCTTCTTCTTCTTCTT	CAATAGACAAGCTTTCAATCTTCAATTGCCTTCAGCTTCCCGATATCCGACGGTAGTGTNNNNNNNNATTGTGTGTCGTCGGG	8591261	8591281	-	10	36642_0123
2:8678430-8678609/16,29/-	0.987222	2	8678594	8678609	3	TACAAAACAAATCCAA	8678430	8678458	1	GCTGATCAAGAGGCAGATCACTCATTTCA	8678459	8678593	GAACTCAAAACCGTTTATACATAGAAAACATCCGAACGATAGATAGAGAGAGAGAGAGAGAGAGAGAGAGAGAGAGAGAGAGAGAGAGAGAGAGAGAGAAAGGGAGTTACAAGAGGAGTTGACTAAGGCTCCATG	GCTGATCAAGAGGCAGATCACTCATTTCACTTCAGCTTCCCGATATCCGACGGTAGTGTNNNNNNNNTACAAAACAAATCCAA	8678495	8678553	-	10	36706_0124_SNP_a
2:8718829-8719008/16,27/-	0.982229	2	8718993	8719008	2	ACACACAGAACACAAC	8718829	8718855	1	GTCAGATCGGAATCGTCCGTCGGTGGT	8718856	8718992	ACACTCTCTCTCTCTCTCTCTCTCTACGATTCTCGCTCACTGTTCATCGAATCCGTCATTGGATCGATTCGAATTTGGTGTGTGTTTTCTTTCCAATACCTCTGATTAGAGATTTCAGCAGATCTGAACGGAGGAGC	GTCAGATCGGAATCGTCCGTCGGTGGTCTTCAGCTTCCCGATATCCGACGGTAGTGTNNNNNNNNACACACAGAACACAAC	8718968	8718989	-	0	36738_0125
2:8740209-8740388/18,25/-	0.980282	2	8740371	8740388	1	CAGGAAGAGACTGAACAA	8740209	8740233	1	GCAGGGACAAGCAAGAGTAGTGGTG	8740234	8740370	AAGGTGAGCTCTCTCTCTCTCTCTCTCTCTCTCTCTCTCTCTCTCTCTCTCTCACTCACTCATCATTTAAAACAACCAAGTCATGTTAATGGAATCTTGAGTTTTTTGCTTTTCAGGCAAAGAACAAAGAAGCAGAG	GCAGGGACAAGCAAGAGTAGTGGTGCTTCAGCTTCCCGATATCCGACGGTAGTGTNNNNNNNNCAGGAAGAGACTGAACAA	8740310	8740362	-	0	36745_0126
2:8831231-8831410/16,28/+	0.982268	2	8831231	8831246	1	CAGACCTAAACATAAG	8831383	8831410	1	CCTTACAGGGTCCTGAAGAACAGGTTTG	8831247	8831382	AAAATTGACAAAATGGAGATACATCGATTCATATGACATGGAAAACGAAATTAGTGATCTTTAGCTCAAATGACATCGTTAAGGACATCGAAACACACACAATGTACGGAAAATAGAGAGAGAGAGAGAGAGAGAT	CCTTACAGGGTCCTGAAGAACAGGTTTGCTTCAGCTTCCCGATATCCGACGGTAGTGTNNNNNNNNCAGACCTAAACATAAG	8831361	8831381	+	0	36806_0127
2:8858148-8858327/16,29/-	0.946313	2	8858312	8858327	1	GCCTATAAATACGTAC	8858148	8858176	1	GTGGTCACAATTGGAGAAAGAAGAGGTCG	8858177	8858311	TTATAAAAAGCATATGTGTACAAGTGTGAGTGGAAAATGAGATGCTAGTAATAGTATCCGCATGTATATGAATTATCAATTATGAAGAGAGAGGGACCATTCAAATTTGAAGGAGACGAGAGAGAGAGAGAGAGA	GTGGTCACAATTGGAGAAAGAAGAGGTCGCTTCAGCTTCCCGATATCCGACGGTAGTGTNNNNNNNNGCCTATAAATACGTAC	8858176	8858199	-	10	36829_0128_SNP_a
2:8900253-8900432/18,27/-	0.966667	2	8900415	8900432	1	GCGTCTCTGTAACCGATT	8900253	8900279	1	GGGCCTATTTTGTTAATTATGTGGCCC	8900280	8900414	GTCATTTTCGCAGCCGTAGGAAGAGAGAGAGAGAGAGAGAGAGTGGGAAGTGAAGCTTTTCAAAAAAAATTAACTTTCGAAATTCAAAATTTGTTGGACCAGAGCAAATATTCTATATAACCCAAAAGTGTAAAT	GGGCCTATTTTGTTAATTATGTGGCCCCTTCAGCTTCCCGATATCCGACGGTAGTGTNNNNNNNNGCGTCTCTGTAACCGATT	8900372	8900393	-	0	36885_0129
2:8920454-8920633/17,23/-	0.980887	2	8920617	8920633	1	CAAGAAGGCTCAGGATC	8920454	8920476	1	GCACTTTGATGTGTGTGTGTGTG	8920477	8920616	TATCATTCACAATTTACAACTAGATAGATATTGTGATCCCCAGTAAAAGAAGAGAGATATGAGAATGATGAATGATGAATGATGAATGATGAATGATGAAGAAGGAAGAAGAAAGGTAGCAAGTAAGAATCAGGATACAC	GCACTTTGATGTGTGTGTGTGTGCTTCAGCTTCCCGATATCCGACGGTAGTGTNNNNNNNNCAAGAAGGCTCAGGATC	8920517	8920558	-	0	36897_0130
2:8952066-8952245/16,29/+	0.972484	2	8952066	8952081	1	CAACCAAAGGCAAGAC	8952217	8952245	1	CGATCCTTTGGTGGATTGAGCAACACGTA	8952082	8952216	GAGGATAGAGTAAAGCGCTTTGGTATGCAGAGCAATAGGCCAGAGAATGTTCCTTTCATCATCATCATCATCATCTTCTTCGGTTAAGCAAAGGCTGATAATATGACGAGTGATGGGATCATCAACCCAAGAATC	CGATCCTTTGGTGGATTGAGCAACACGTACTTCAGCTTCCCGATATCCGACGGTAGTGTNNNNNNNNCAACCAAAGGCAAGAC	8952137	8952156	+	0	36918_0131
2:8955432-8955611/17,28/+	0.981054	2	8955432	8955448	1	GAGTGGTCAAAAACATC	8955584	8955611	1	GAGATCTAAAGGAGAATAAGGAGAGACC	8955449	8955583	ACAAGACTAAAAATACTAAGAAAACAGTCAAAGCATCTATAAAGAGAATTGGAAACAAAAGAGTTATATAGATTCTACAGCTAAAAGAAGAATAAGAAGAAGAAGAAGAAGAAGAAGAAGTGTAGAATGGTGAAG	GAGATCTAAAGGAGAATAAGGAGAGACCCTTCAGCTTCCCGATATCCGACGGTAGTGTNNNNNNNNGAGTGGTCAAAAACATC	8955533	8955568	+	0	36920_0132
2:8974232-8974411/17,28/+	0.978993	2	8974232	8974248	1	ACACGTTACAACAGGAA	8974384	8974411	1	GACTGGTAGCGAGACATTGCACCGTTAC	8974249	8974383	TGTGAGAAATCAGATCAGAAACAATGCGATTCAACAAAATCGAATAAAAAGTAGATCCCCAGATGATGATGATGATGATGAGATTGAATCAAGCTTACCGCAAAAGGATTAATTTCTCCGTCATCAAAGGAATGA	GACTGGTAGCGAGACATTGCACCGTTACCTTCAGCTTCCCGATATCCGACGGTAGTGTNNNNNNNNACACGTTACAACAGGAA	8974310	8974332	+	10	36928_0133_SNP_a
2:8974367-8974546/16,29/+	0.96575	2	8974367	8974382	1	CGTCATCAAAGGAATG	8974518	8974546	1	GGAAGTGTTTGGCGCGTCTGGGTTATACC	8974383	8974517	AGACTGGTAGCGAGACATTGCACCGTTACTCAGCAAATCCAATCTCTCTACACGGATCACACCGAGCGAGAGAGAGAGAGAGAGAGAGAGAGCGATTGGAGATGAAGCAATTGGGTGCGCGTTTTAGAGTAATAA	GGAAGTGTTTGGCGCGTCTGGGTTATACCCTTCAGCTTCCCGATATCCGACGGTAGTGTNNNNNNNNCGTCATCAAAGGAATG	8974446	8974474	+	0	36929_0134
2:9008603-9008782/23,22/-	0.972563	2	9008760	9008782	1	TGTTCTTTCTGTTTGTTAGGTGT	9008603	9008624	1	GGGTGGCCTTTCTTGAGGTGAC	9008625	9008759	TTCATATCCTCGGTGATTAAGCTGAGGTAAGAGGCAAAAACTGTCATTAGCATGTGTAGAAATATATATATATATATATATATATATGAAGATGTGAAAGTAGAGAGTAGAGAGCAGTACCGTAATAAGTCTAGA	GGGTGGCCTTTCTTGAGGTGACCTTCAGCTTCCCGATATCCGACGGTAGTGTNNNNNNNNTGTTCTTTCTGTTTGTTAGGTGT	9008673	9008698	-	0	36944_0135
2:9048194-9048373/16,29/+	0.977831	2	9048194	9048209	2	CAAAGATTGATGAACC	9048345	9048373	1	GTTTTCTGGTGTTTCGGCCGGAATTGAAG	9048210	9048344	CTAAAAGTTAAAAAGATGTTGAAAGAAGAAGAAGAAGAAGAATTGCACTTAGTGGAGTCAAATTCTCATCCAAGCTACAATTAGAATTTTGCCATTAATCCTTTGGGCGACGAGTGAGCTATGCCAATTGAACAA	GTTTTCTGGTGTTTCGGCCGGAATTGAAGCTTCAGCTTCCCGATATCCGACGGTAGTGTNNNNNNNNCAAAGATTGATGAACC	9048232	9048251	+	0	36971_0136
2:9126228-9126407/17,24/-	0.980509	2	9126391	9126407	2	GGGTTTAGGATTAATGG	9126228	9126251	1	GACGCTGCGAGTAGCTTGTATATG	9126252	9126390	ATAATACGAGATAAAGTAAGAAGAGGAAGGAGATTTTTTGAATCAAACTAAGAAGAAGAAGAAGAAGAAGAAGAAGAAGAAGAAGAAGAAGAAGAAAGCAGAGAGCAGCAGAGAAATATGATGGATAGATGAATTTGCA	GACGCTGCGAGTAGCTTGTATATGCTTCAGCTTCCCGATATCCGACGGTAGTGTNNNNNNNNGGGTTTAGGATTAATGG	9126295	9126341	-	0	37023_0137
2:9152031-9152210/18,27/-	0.968195	2	9152193	9152210	1	CCTCAGATCAGATCAGTT	9152031	9152057	1	TTCGTCGTATAGATCTGAATCCCTCCG	9152058	9152192	CACAAGGGGAAGCGATCAAGCTCAGCTTCACGGTGACGATCAGTAGCATTACCAGAGAAGCGTGGATGCGAGAGCAAGAGAAACACAAGGATCGTCTAGAAGAAGAAGAAGAAGAAGAAGACGGTGAGATTCAGT	TTCGTCGTATAGATCTGAATCCCTCCGCTTCAGCTTCCCGATATCCGACGGTAGTGTNNNNNNNNCCTCAGATCAGATCAGTT	9152072	9152095	-	0	37035_0138
2:9185499-9185678/17,28/-	0.967385	2	9185662	9185678	1	ACAAACACATTCCAAAC	9185499	9185526	1	GTTTGCTGCAAATGCAGATCTGATTTTG	9185527	9185661	AAAACTAAGAAAAATTTCTGAATCTTCTGCTTGATTCAATGGATGCTAATCAACAAAATCCACAAAAGAAAGGTATGGATCATTGTTATCCAATGTTATATGAATTCATACACAACACACACACACACACACATT	GTTTGCTGCAAATGCAGATCTGATTTTGCTTCAGCTTCCCGATATCCGACGGTAGTGTNNNNNNNNACAAACACATTCCAAAC	9185529	9185552	-	10	37052_0139
2:9218801-9218980/27,18/-	0.981898	2	9218954	9218980	1	CTGGTGCTGGTTTTTCTTGGCTTTGCT	9218801	9218818	1	CTCTGCTTCAAGTGCGTC	9218819	9218953	TCAGAAGCAAAAGAGATGTTTCTTCTTCTTCTTCTTCATCTTCTGGAACTGAGCTTCTTCTTGACGATCAATGTAAGCAAGTAACTCTTCCTGTCTCATCAAAGCTTCGTAAAGGGCCTTTTTAGTAGCTATGAG	CTCTGCTTCAAGTGCGTCCTTCAGCTTCCCGATATCCGACGGTAGTGTNNNNNNNNCTGGTGCTGGTTTTTCTTGGCTTTGCT	9218910	9218934	-	0	37078_0140
2:9219306-9219485/16,29/+	0.833109	2	9219306	9219321	6	GTTTTTGCATTTTTCT	9219457	9219485	1	ACAGTAATAGAAACAACCTAAATGGAGCT	9219322	9219456	TTACTTCATATTTTGTTTTTGTAAGATCAATCAGTTTTTATGAAGAGAAAATGGAGATAACAATATCCCAATTGTGCTCTCGAGTTAAGTTTTCATCATCATCATCATCATCATCACTTTTCTGTTTCTATGGAA	ACAGTAATAGAAACAACCTAAATGGAGCTCTTCAGCTTCCCGATATCCGACGGTAGTGTNNNNNNNNGTTTTTGCATTTTTCT	9219414	9219437	+	0	37079_0141
2:9277732-9277911/19,25/-	0.802315	2	9277893	9277911	1	GGTACGAACTTGCTTGTCC	9277732	9277756	1	GAACCAAGTAATGACTTACGTGCAA	9277757	9277892	TGTAATTGATATATATATATATATATATATATATATATATATATATATATATATATATATAAAACAAAAACATAACCAATACATTCAAAGATCACCCACTATCACAAAAAGATCAGTTTTTGTATTTGAATTTTAT	GAACCAAGTAATGACTTACGTGCAACTTCAGCTTCCCGATATCCGACGGTAGTGTNNNNNNNNGGTACGAACTTGCTTGTCC	9277832	9277884	-	0	37126_0142
2:9284280-9284459/17,28/-	0.977132	2	9284443	9284459	1	GAAATTTGAAGAGTGAC	9284280	9284307	1	AGCTCACTGAGATGAAAAGATCTCTGTA	9284308	9284442	ACAGAAGCAATGTGAAATTCTAGGGTTTAGAGAAAGACACACGGAACACAGAGAGAAAGAGAAAATAACAACAACAACAACAACAAAAACTATACGGGAGACAAAAATCTGAAGTTGAGGATGAAAGAAAGTGAA	AGCTCACTGAGATGAAAAGATCTCTGTACTTCAGCTTCCCGATATCCGACGGTAGTGTNNNNNNNNGAAATTTGAAGAGTGAC	9284353	9284376	-	10	37130_0143_SNP_a
2:9363906-9364085/16,29/-	0.979321	2	9364070	9364085	1	GATCATGTTATGGCTG	9363906	9363934	1	GTTGCGGTTACAGGTTGTTGATGTAGTAG	9363935	9364069	CATAACTAGACATCTTCTCAACTGTCAGAGATGTTTTTTCTGCAATGCTACGGTGATAGATGTTATAAGAGATAAAGAAGAAGAAGAAGAAGAAGACGATGATGGTCACAAAAGAAGCACATGAAGCTCGGGTTA	GTTGCGGTTACAGGTTGTTGATGTAGTAGCTTCAGCTTCCCGATATCCGACGGTAGTGTNNNNNNNNGATCATGTTATGGCTG	9363974	9363995	-	0	37195_0144
2:9478820-9478999/20,25/-	0.913691	2	9478980	9478999	1	TCCTTTTAAAATAGTCAAAC	9478820	9478844	1	GTTACGGAGGCTAGGGCTGATGGGC	9478845	9478979	ACAAGTTCCATTAATTTATTATTATTCGCGAGGAACAGAAATTTCAGTATCGATCTTCTTCTTCTTCTTCTTCGCCAATTTCAACACTTTCGAAATCTGAGAATCTTCTGTGTGAATCGGAACGAAATTAACGGT	GTTACGGAGGCTAGGGCTGATGGGCCTTCAGCTTCCCGATATCCGACGGTAGTGTNNNNNNNNTCCTTTTAAAATAGTCAAAC	9478907	9478926	-	0	37301_0145
2:9554087-9554266/17,28/-	0.980694	2	9554250	9554266	1	GCTATAGGAGTGAAGAG	9554087	9554114	1	CCACAAGTACTCATGACATTTGAGGTTC	9554115	9554249	AGAACAGTTGAGTCATGTACAAATTCCTCACAGAGTAGTCCAGACAACAACAACAACAACAACAACAGCAACAAGAGGAGGAGAAAACAATGAGAGAGAATAAAAGAGTCATACATTGCTTTTTACAACCCAAAA	CCACAAGTACTCATGACATTTGAGGTTCCTTCAGCTTCCCGATATCCGACGGTAGTGTNNNNNNNNGCTATAGGAGTGAAGAG	9554176	9554206	-	0	37359_0147
2:9785553-9785732/20,25/+	0.963952	2	9785553	9785572	1	GGCCTTTTGCCAAGTGTATC	9785708	9785732	1	TTTTCCTTTGATCTTGAGACCATGC	9785573	9785707	AAGAATGGTATAAACTACAAGTTGACAATATATTTTAGGCGAATGATTTCAATGGTGGTAGTACTGGGACGATACACTTGTAACATTTCAAACAATGCAGTGACAACACAACAGAACACAACACAACACAACATA	TTTTCCTTTGATCTTGAGACCATGCCTTCAGCTTCCCGATATCCGACGGTAGTGTNNNNNNNNGGCCTTTTGCCAAGTGTATC	9785675	9785705	+	0	37609_0148
2:9795033-9795212/16,29/-	0.779712	2	9795197	9795212	2	TAGAAACTTAAACCGG	9795033	9795061	1	GTACATCCTTCTAAACGAGGGACCAAGAC	9795062	9795196	ATAAAATAATATATGGTGTTTGGTTTGTTTGATTCAAATTTGATTTAGTTTAGTTGTAGTTAGAAAAGTAGAATTTATGATATATATATATATATATATTTTTTTAAATTACTAAGAGATTTTGGGCATAGGCCC	GTACATCCTTCTAAACGAGGGACCAAGACCTTCAGCTTCCCGATATCCGACGGTAGTGTNNNNNNNNTAGAAACTTAAACCGG	9795098	9795121	-	0	37627_0149
2:9806677-9806856/18,27/-	0.907214	2	9806839	9806856	1	GTTTGCTACGTGTAAACT	9806677	9806703	1	GTCTCTACAGATATTTTGGACGAGAAG	9806704	9806838	AAATCACTTTTTTTTTTTTTTTGTGTGTGTGTGAGAGAGATTTAATAACTTTTATTAAGAGACAAACTAAACAACATCCTTCTTAGTCACTACTCTCTCTCTCTCTCTATATATATATATATATATATATATCTA	GTCTCTACAGATATTTTGGACGAGAAGCTTCAGCTTCCCGATATCCGACGGTAGTGTNNNNNNNNGTTTGCTACGTGTAAACT	9806707	9806731	-	0	37649_0150
2:9845642-9845821/26,19/-	0.92238	2	9845796	9845821	1	GCCACACTCATGACTTTGATTGTTTT	9845642	9845660	1	GCACAGATTCTGGTCTCTC	9845661	9845795	GAAGAGTTCTTTATTTGGAGAAAATCTTGTAACTTGTCAGGCACAGGCGTTGCTCAGTTACTTCAGAAACCAACGGCATGGAAACGCTGGGCGTGGCTGATGATGGATGATGATGATGATGATGATGTTGATGAT	GCACAGATTCTGGTCTCTCCTTCAGCTTCCCGATATCCGACGGTAGTGTNNNNNNNNGCCACACTCATGACTTTGATTGTTTT	9845660	9845698	-	10	37682_0086
2:9869572-9869751/16,29/+	0.859785	2	9869572	9869587	1	ATACCATTTCATACCC	9869723	9869751	1	GCCTGCTAGTTTGGAGGAGAGTATTATAC	9869588	9869722	AAGTTAACCGAATGTTTAACCCAAAAATTGTTTTCTAGATAAACAATAATTCTATAGCTGTATATTATTATTATTATTATTATTTATTTTTTCTCAACCATGCGATTAAATAACATTAAGAAATCTTGACTAAGT	GCCTGCTAGTTTGGAGGAGAGTATTATACCTTCAGCTTCCCGATATCCGACGGTAGTGTNNNNNNNNATACCATTTCATACCC	9869650	9869675	+	0	37703_0087
2:10112854-10113033/16,29/+	0.981744	2	10112854	10112869	8	AGAGAGAGAGAGGAGT	10113005	10113033	1	GCAGAGAATTAAAGAAATGATTGATGATG	10112870	10113004	CAACTAGGTATTATACAGTTTTTCTCCAATCTCTTTCTTGTAACTCTTTTAAGGTTCTCACTTTCAGCTTCGGTCATCATCTACATATATGGTATAGAGAGAGAGAGAGAGAGAGAGAGGAAGTACCTTGGAGTT	GCAGAGAATTAAAGAAATGATTGATGATGCTTCAGCTTCCCGATATCCGACGGTAGTGTNNNNNNNNAGAGAGAGAGAGGAGT	10112965	10112988	+	0	37932_0152
2:10121207-10121386/16,28/-	0.944224	2	10121371	10121386	2	CTTTGGTGAATCCTCC	10121207	10121234	1	GCATTGGTTTTGAGTGTGATCGGTGCAG	10121235	10121370	TGCAAATACTAACTCTCTCATTCCTCCTCCTCCTCCTCCTCCTCCACAATCGGTTTCTCCTCCTCCATTGTCGCCGGATGGTAGGAAATCGAAGAAGAAAACATGGGTCTATGCTCTTGCCGGAGTACTAGGAGGA	GCATTGGTTTTGAGTGTGATCGGTGCAGCTTCAGCTTCCCGATATCCGACGGTAGTGTNNNNNNNNCTTTGGTGAATCCTCC	10121326	10121349	-	0	37943_0153
2:10199645-10199824/16,28/+	0.980333	2	10199645	10199660	2	TAAAACACACAAAACC	10199797	10199824	1	ACTTTTGGTGAAGATGGTGAGCAATGGG	10199661	10199796	TTTTCATGTAAAAACAACAACAACAACAACAACAAAAATGGTTAATGAGCAAAAGAGATTTGCTTTGTTTCTTGCTACGAGCGATTCAACGTTCGTGAAGAAAGCGTATGGAGGCTATTTCAACGTGTTTGTTTCG	ACTTTTGGTGAAGATGGTGAGCAATGGGCTTCAGCTTCCCGATATCCGACGGTAGTGTNNNNNNNNTAAAACACACAAAACC	10199673	10199695	+	0	38028_0154
2:10205910-10206089/16,29/+	0.93143	2	10205910	10205925	1	GTAGGTTGGTGCCACT	10206061	10206089	1	GTGATAAGTTACATAAGTAATAGTCGGTT	10205926	10206060	GCTTTATATATATATATATATATATCCTTGTGTATATGTCTATGTGTTTCTTTAGTTTAAATGATTCTGCTGCATGGTGTAGTCTTTACAGTTGCTATTGTTGTTTTCTCTATTCATTTGAAAAGAGATAAAGAT	GTGATAAGTTACATAAGTAATAGTCGGTTCTTCAGCTTCCCGATATCCGACGGTAGTGTNNNNNNNNGTAGGTTGGTGCCACT	10205930	10205950	+	0	38030_0155
2:10227724-10227903/22,21/+	0.980424	2	10227724	10227745	1	TGCCAGTCACGGTTATCAGTCT	10227883	10227903	1	TTCCCCCAACTCTGCTCTTCG	10227746	10227882	CGGTATGACGATGCTGAGTATGATTTGTTATCTAATAAGACCAAAACCAAGAATGAAAGTTTAAAAGACAGATTCCAAAACAGGAGGATTACACACACACACACAGACACACACTTACTTTACTCTCGGCTGCATGA	TTCCCCCAACTCTGCTCTTCGCTTCAGCTTCCCGATATCCGACGGTAGTGTNNNNNNNNTGCCAGTCACGGTTATCAGTCT	10227836	10227859	+	0	38044_0156
2:10231215-10231394/17,25/-	0.968699	2	10231378	10231394	2	AAACTCAAGAATCGATC	10231215	10231239	1	GTGGGTGGTTCTTGTGGTTTCCGAA	10231240	10231377	TGTAGAGGCTCTGGCTCAGGCTCAGGCTCAGGCTCAGGCTCAGGTTCAGGCTCAGGCTCAGGCTCAGGCTCAGGCTCAGCTGTTATTTCTGCAGCTGAAGCTGAAGCTTCGTTTTCCGCTGTTTTTTTCTTCTTTCTT	GTGGGTGGTTCTTGTGGTTTCCGAACTTCAGCTTCCCGATATCCGACGGTAGTGTNNNNNNNNAAACTCAAGAATCGATC	10231299	10231372	-	0	38045_0157
2:10258188-10258367/16,29/+	0.979261	2	10258188	10258203	1	CTGTTATGACCGTTCT	10258339	10258367	1	GCTCGTTGATGTTTGTAATTGGTCTGGTG	10258204	10258338	TGCTTCTAAAGAGAACGATCATGAGCTAATAAAAAGTGATCAAATCTCTTTGCTTTCTTTCAAATCATCCATTGTTTCAGATCCTCAAAACTCTCTAAGCAGTTGGATTTCTTCTTCTTCTTCTTCGTCTTCTAT	GCTCGTTGATGTTTGTAATTGGTCTGGTGCTTCAGCTTCCCGATATCCGACGGTAGTGTNNNNNNNNCTGTTATGACCGTTCT	10258312	10258336	+	0	38065_0158
2:10329636-10329815/16,26/+	0.982712	2	10329636	10329651	7	TGTGTGTGTTGTGTTG	10329790	10329815	1	GATAGATTTTTATGGAAGGAGTGGTG	10329652	10329789	ATTTGTGTTCTGTTCACACAATGTTTGAATATATATAGCCAAAGAGACAAAAACAGAGAAGAAGACTAACTCTCTCCTCTGTGTCTCGCTTCTTGAGTGTTGTATAAGAGAGAGAGAGAGAGAGAGGAAGTGATTATT	GATAGATTTTTATGGAAGGAGTGGTGCTTCAGCTTCCCGATATCCGACGGTAGTGTNNNNNNNNTGTGTGTGTTGTGTTG	10329758	10329777	+	0	38115_0159
2:10333418-10333597/16,25/-	0.929745	2	10333582	10333597	1	GGCTGCTAACAAAAAA	10333418	10333442	1	GAGCAGACAAAAACAGGGGAAAATG	10333443	10333581	AGGTAGCAAAGAAGAGAAGACCTCTCTTCAATGTGTACAAATTTTGTAGCCCCGCCAAAAAACAGAGCGACATCAACTTCTGTTCAGTTGACTTCGAATGTATCATCAAATAGCCTCAAAGAAGAAGAAGAAGAAGAAG	GAGCAGACAAAAACAGGGGAAAATGCTTCAGCTTCCCGATATCCGACGGTAGTGTNNNNNNNNGGCTGCTAACAAAAAA	10333443	10333463	-	10	38119_0160
2:10385472-10385651/16,29/+	0.794434	2	10385472	10385487	2	CACAGAAACTTAAACT	10385623	10385651	1	GAGTTTTGTAGATTGTGGATGTGATATCT	10385488	10385622	ATTACATAGACTTTTTTTTTCTTGGATTGATATATATATATATATATATATATATTCCAAAGATTAACATTTAGTATACATCTAGCCTCCGTTCGATAAGCTCATGTCTATAAGCTTATATTTAGTACAAGAAAA	GAGTTTTGTAGATTGTGGATGTGATATCTCTTCAGCTTCCCGATATCCGACGGTAGTGTNNNNNNNNCACAGAAACTTAAACT	10385517	10385542	+	0	38155_0161
2:10433515-10433694/17,28/-	0.976949	2	10433678	10433694	1	CCGTTGAGTCTCGGTGT	10433515	10433542	1	GGGAACCGGTCTTGCATCGTTTTGGTAC	10433543	10433677	TCTATTTGGTGGTGAGTCGATACATACAATCGATGATTTTTTTTATTATCATTATTATTATTATTATGACTTTAACGATCTATAATTGTTTAACAAGATCATATATTACGATTTGTACATTAACTTTTTCATTAT	GGGAACCGGTCTTGCATCGTTTTGGTACCTTCAGCTTCCCGATATCCGACGGTAGTGTNNNNNNNNCCGTTGAGTCTCGGTGT	10433611	10433635	-	0	38191_0162
2:10456672-10456851/20,23/-	0.980854	2	10456832	10456851	13	GTTGTTGTTGTTGTTGTTTT	10456672	10456694	1	GTCTCATACTATCTCCCGTGTGT	10456695	10456831	TATTTTAATGTTCTCTTGGAAATTGTAAAGAAAGAGAGACAGAGAAGAGAACGTGGGTTCCATTAAAGCCAAATTTGTATATAAAATTTTTGTTTTGAAGGAGATGATGATGATGATGATGACTCTTTCTCTCTCGA	GTCTCATACTATCTCCCGTGTGTCTTCAGCTTCCCGATATCCGACGGTAGTGTNNNNNNNNGTTGTTGTTGTTGTTGTTTT	10456710	10456729	-	0	38220_0163
2:10456771-10456950/18,26/-	0.980189	2	10456933	10456950	1	CAAAAGATGAAGAGAGAG	10456771	10456796	1	GAGACAGAGAAGAGAACGTGGGTTCC	10456797	10456932	AGAGAATAAGTAGAAACAGCTAATGTAATGCAGCTAAGAGAGGGTAAAAACGAGTGAAAGAGTAATACTAACAAAACTTTTGTTGTTGTTGTTGTTGTTTTTATTTTAATGTTCTCTTGGAAATTGTAAAGAAAGA	GAGACAGAGAAGAGAACGTGGGTTCCCTTCAGCTTCCCGATATCCGACGGTAGTGTNNNNNNNNCAAAAGATGAAGAGAGAG	10456834	10456853	-	0	38221_0164
2:10532191-10532390/16,29/+	0.716634	2	10532191	10532206	1	GAAACATTAGTCAAGC	10532362	10532390	1	GAAGAGAAAATTGGAAGCAAGAAAGAAAG	10532207	10532361	AATTTACGCAAAAATAAATAAATAACATATATATATATATATATACACATATATATACCTCAACACGAACGATACATAAAGCAATAACATATTGAAACAACGAATCAAGCATATACCTTAAAACTGAAATTCAATAAAGAAGACGGATCGAAGGA	GAAGAGAAAATTGGAAGCAAGAAAGAAAGCTTCAGCTTCCCGATATCCGACGGTAGTGTNNNNNNNNGAAACATTAGTCAAGC	10532233	10532263	+	0	38299_0063
2:10588111-10588290/19,26/+	0.981051	2	10588111	10588129	1	TGACGGTAGTAGTAGCTGG	10588265	10588290	1	GCCGAGAAGGTTGAAATCGGAGGTTT	10588130	10588264	AAAACGGCGAACGACTGGTACGAAACCTAGCTTCGTTATCCTAGGAGAATTCCATGGATTTAGAATCGATTTCGCTACGAGATGTGAATCGCAACACATGCAAATCGTCATTTTCTCTTCTTCTTCTTCTTCTTC	GCCGAGAAGGTTGAAATCGGAGGTTTCTTCAGCTTCCCGATATCCGACGGTAGTGTNNNNNNNNTGACGGTAGTAGTAGCTGG	10588242	10588264	+	0	38349_0168
2:10726680-10726859/16,29/+	0.981709	2	10726680	10726695	1	TGTGTATACAAGAAGT	10726831	10726859	1	GAACCATGGTATTGGCAGTGACGAAGGAG	10726696	10726830	TAGGTAGATAGATATCAAAAGATTCCACCATATGTGGATCAAATCACAGATCAAAGAGACATAAAATCTAAAAACTTGATGAAAAACAGATCCAAGAAAACAGAGAGAGAGAGAGAGAGAGAGAGAGAGAGAGAG	GAACCATGGTATTGGCAGTGACGAAGGAGCTTCAGCTTCCCGATATCCGACGGTAGTGTNNNNNNNNTGTGTATACAAGAAGT	10726797	10726830	+	0	38510_0169
2:10735226-10735405/18,26/-	0.972764	2	10735388	10735405	1	TGGCGACTTCTGGTCTTG	10735226	10735251	1	GGATCTGATCGTGATCGGTTTCTTAG	10735252	10735387	AGCTTTAGGTCTTCGATTTTTCTTAGAACCCGAAGACGAAGAAGAAGAAGAAGAAGGATGATTACCACTTGATTTTGCTCGAATGTGTGAACGATGATTATCAGGTGTCGATGAAGACGGAGAAGAAGACAGTAAA	GGATCTGATCGTGATCGGTTTCTTAGCTTCAGCTTCCCGATATCCGACGGTAGTGTNNNNNNNNTGGCGACTTCTGGTCTTG	10735332	10735356	-	0	38522_0170
2:10745532-10745711/16,29/+	0.904491	2	10745532	10745547	1	GAAGATCATCAAAAGA	10745683	10745711	1	GAAGAGTGAACGAACTATCACTTTCTCTC	10745548	10745682	ATTAGAGACTGAAAATGAAGAAGAAGAAGAAGAAGAAGCTCTCTCATTTTTTTGTTTTTTTTGCTAAGAAAAGAAAAGTTTTTGATGAAATTCAATCTAAAGACTTTTTTGGTGTTTTGAAATTCTTGAGAAAGC	GAAGAGTGAACGAACTATCACTTTCTCTCCTTCAGCTTCCCGATATCCGACGGTAGTGTNNNNNNNNGAAGATCATCAAAAGA	10745564	10745585	+	0	38530_0171
2:10770983-10771162/16,25/+	0.980106	2	10770983	10770998	1	GGGGTGCTGGTCTTGA	10771138	10771162	1	GTATGGCCAAGTTGAAGATGCACAA	10770999	10771137	ACCACTTGGCGGTGTTCTTATTTCCACTGTTGGATAAATCGACGTTAATTAGTCCTACAAAAAGAAAAAAAAAAATATATATATATATATATATATATATATATATATATTGTTTCTACTTACAAAGTTTGCGGATTTG	GTATGGCCAAGTTGAAGATGCACAACTTCAGCTTCCCGATATCCGACGGTAGTGTNNNNNNNNGGGGTGCTGGTCTTGA	10771073	10771108	+	0	38549_0172
2:10823351-10823530/16,29/+	0.930331	2	10823351	10823366	1	TGGTGGTGTACCGAAG	10823502	10823530	1	CGGTTACTTGATAGGTTTTTGTCATTGAG	10823367	10823501	AGATCTCGGTCTTACGGAGATATGACTGAGATGGGAGGAGGAGGAGGAGGAGGAGGGAGAGATGAGAAGAAAGTTGTTACGCCTTTAAGGGAAATGACGCCCGAAAGGATTTTCGGAAAGATGGGTCATCTTCAA	CGGTTACTTGATAGGTTTTTGTCATTGAGCTTCAGCTTCCCGATATCCGACGGTAGTGTNNNNNNNNTGGTGGTGTACCGAAG	10823400	10823422	+	0	38584_0173
2:10849986-10850165/19,26/-	0.946524	2	10850147	10850165	1	CGTTTCCGTGTTTGAGGTG	10849986	10850011	1	GCTATAGATCTTATCTGCAATTTCTC	10850012	10850146	ATTTACGTACGAGGAATAAGATTTGGCTTATAGGATAGTGTTCACCGATGACTTGATTCTTCCTAGATCTATAGATATATATATATATATATATATATATATATAGATCTGAGTTTTAGTTTTGGCCGTTGACGA	GCTATAGATCTTATCTGCAATTTCTCCTTCAGCTTCCCGATATCCGACGGTAGTGTNNNNNNNNCGTTTCCGTGTTTGAGGTG	10850042	10850077	-	0	38601_0174
2:10914788-10914967/23,22/+	0.979263	2	10914788	10914810	1	TTTCTCTTCCTGTGGTGGTGGTG	10914946	10914967	1	GTCCGCCGTTGATCGTCCGGAT	10914811	10914945	ATAACTCCGACGATACCCTCTCCCATCGAGAATCTCCACGGAATCCTTCCTCAAAGCGTGCTGCTGCTTCCTTCGCAGCAGAAGCAGGCGAAGAGACTATGAAGAAGAAAAAGAAGAAGAAGAAGAAGAATTTGG	GTCCGCCGTTGATCGTCCGGATCTTCAGCTTCCCGATATCCGACGGTAGTGTNNNNNNNNTTTCTCTTCCTGTGGTGGTGGTG	10914911	10914940	+	0	38641_0175
2:11062625-11062804/17,25/-	0.98066	2	11062788	11062804	1	GTTGTTGTTGTTGGGTG	11062625	11062649	1	GGGAATCCCATGCCGGGGTGATATT	11062650	11062787	TTCTGAAGATTTCCAGGATGTCCAAACTGGTTCATTTGCTCATTGGGTTGTTGTTGTTGTTGTTGTTGGCTTGAACAATATGGGTTCATTATGGTGGGCATCATTCCATATGGAGGGAAGTAGCCATTACCAGGAGGT	GGGAATCCCATGCCGGGGTGATATTCTTCAGCTTCCCGATATCCGACGGTAGTGTNNNNNNNNGTTGTTGTTGTTGGGTG	11062720	11062741	-	0	38753_0176
2:11112008-11112187/16,26/+	0.98219	2	11112008	11112023	1	GGTGGTTGTTTCATCG	11112162	11112187	1	CGCAAATTGATCTCCTTCTTGGCTGC	11112024	11112161	AAAGCAACAGTAATCTTAAAGAACAAGAAAAAAAACCCATCAATGTTAATAATCATATCCAGATATTGAAGAAATATATATATATATATATATATATATATATATATGAAGAAACTCACAGTGTTGGAGTCCACAAGA	CGCAAATTGATCTCCTTCTTGGCTGCCTTCAGCTTCCCGATATCCGACGGTAGTGTNNNNNNNNGGTGGTTGTTTCATCG	11112097	11112130	+	0	38797_0177
2:11164670-11164849/16,28/+	0.911044	2	11164670	11164685	1	ACAAGGCGAAATCGAT	11164822	11164849	1	GATGATATTGTGTTAAAGAACTCGAAGA	11164686	11164821	CTTCTTCTTCTTCTTCTTCATCCCCTTGCGTTTTCCATCTCCATCGTCTGCTGAAACCATTTGATCGATCTCTCAGGTGATCCCTGTTTTTCTTTTTGTCTTTCTCTCTGCTAGCAATTCCTGGGCTAAATTGGAT	GATGATATTGTGTTAAAGAACTCGAAGACTTCAGCTTCCCGATATCCGACGGTAGTGTNNNNNNNNACAAGGCGAAATCGAT	11164685	11164704	+	10	38860_0178_SNP_a
2:11293039-11293218/16,28/-	0.977198	2	11293203	11293218	1	CAGGAGAAAACATTGG	11293039	11293066	1	GTAAAGGAAGAGACTTGGAAGCCTAGCA	11293067	11293202	TATAACTGAGGAAATGAGATTCGTCGCCATGAGATTACGCAATGTTAATGGTAAAAAATTAGATCTTTCTGAAGATAAAACTGACACCGAGAAGGAAGAAGAAGAAGAAGAAGAAGACGATGATGATGATGATGAA	GTAAAGGAAGAGACTTGGAAGCCTAGCACTTCAGCTTCCCGATATCCGACGGTAGTGTNNNNNNNNCAGGAGAAAACATTGG	11293086	11293113	-	0	38962_0179
2:11316618-11316797/17,28/-	0.981089	2	11316781	11316797	1	GTACCAAGCGAAGTCAG	11316618	11316645	1	CGACAGCGACATCGAAGCAATCAGATAC	11316646	11316780	ATTGAAGAAGAAGAAGAAGAAGAACTTGAGAAGAAGTAACTTAGAACTTCTCATCTGAGAAGAGTTATCAGAAAACTGTGGAAAAAAAGTGGAAGAAGAAGCAAAGGGTCATCGAGAGTAAACGGGAATCTGATT	CGACAGCGACATCGAAGCAATCAGATACCTTCAGCTTCCCGATATCCGACGGTAGTGTNNNNNNNNGTACCAAGCGAAGTCAG	11316757	11316777	-	0	38990_0180
2:11337998-11338177/20,25/-	0.823639	2	11338158	11338177	1	GTGTGTTATATAGTGAAAAG	11337998	11338022	1	CAGGACTTAGGGAACCCCTCCAGTT	11338023	11338157	TTAAAACTTGAAAAAACAAAGAAACATAATCCATTTTAGAACAACTAAACATAAATTAAATCAATTAAGTTTTTAGAATATTATATATATATATATATATATATATATATATATACTAGTTGTATTTGTCACAAT	CAGGACTTAGGGAACCCCTCCAGTTCTTCAGCTTCCCGATATCCGACGGTAGTGTNNNNNNNNGTGTGTTATATAGTGAAAAG	11338043	11338080	-	0	39003_0181
2:11350628-11350807/16,28/+	0.980398	2	11350628	11350643	14	GCACACACAAAAAAAA	11350780	11350807	1	GTCCTTTGTAGTCTACGGCATCAGCCAC	11350644	11350779	TGGCATATCTATTATGTACATGAGGACCAAATGTATATATATATATATATATATATGTCAAGTAGAAAAGAAGAAGACGAACCAAGAATGAGAGCGGCAGTGATCCAACCACCGGTTTTGGATTTGTCGGCAGGTC	GTCCTTTGTAGTCTACGGCATCAGCCACCTTCAGCTTCCCGATATCCGACGGTAGTGTNNNNNNNNGCACACACAAAAAAAA	11350677	11350699	+	0	39007_0182
2:11413820-11413999/16,24/+	0.984649	2	11413820	11413835	1	TCTGGCGGTAAGTGTG	11413976	11413999	1	GCTCGCTTTTGTGCTTTACGATGG	11413836	11413975	TATATATATATATATATATATATTTTTTTTTTTCTCTCTCTCTTTTTGTGTATTATTTCAAGATGATTTTGTTACCAAAGTATCAGGGGTTTATAAAGTCTAGTATCTTTATTGCTTCTATTGACCAGGAACAAAATGAA	GCTCGCTTTTGTGCTTTACGATGGCTTCAGCTTCCCGATATCCGACGGTAGTGTNNNNNNNNTCTGGCGGTAAGTGTG	11413836	11413858	+	10	39105_0183
2:11518280-11518459/18,26/+	0.836018	2	11518280	11518297	1	GATTGGAAACAAGAAAAG	11518434	11518459	1	GATCTGATAGCTACAGAGAGATTGAG	11518298	11518433	GGTAAAGAAGAAGCAAGACAGAGAATATCTCAATCTTATATATATATATATATATATATATATATATATATATATATTACTTATTTAAAAAGCAAAAAAGAACCTTAATTTTTTGTTGGGGATCAACATAAGAGAA	GATCTGATAGCTACAGAGAGATTGAGCTTCAGCTTCCCGATATCCGACGGTAGTGTNNNNNNNNGATTGGAAACAAGAAAAG	11518334	11518374	+	0	39189_0186
2:11531998-11532177/17,26/-	0.974184	2	11532161	11532177	1	ATACAAAAGAGGAAAGA	11531998	11532023	1	TCAACGTTGGTGTGTGTAATGAGAGG	11532024	11532160	TCTGAGAGAGAAGAACCATCTCCGTCTTTGTCGAAAAGGCTAAAAGCTTCCTTGAACTCAGAGATCTGATCATCGGTGAGCTGATCTGCCATTTTTTGGTTTAGATGAGAAAGAGAGAAGAAGAAGAAGAAGAAGAA	TCAACGTTGGTGTGTGTAATGAGAGGCTTCAGCTTCCCGATATCCGACGGTAGTGTNNNNNNNNATACAAAAGAGGAAAGA	11532024	11532050	-	10	39206_0187_SNP_a
2:11545722-11545901/16,29/-	0.97164	2	11545886	11545901	1	AACTTCAGAGATGGAG	11545722	11545750	1	GATGCTTTGGTGGGGGGATTTAAAAGATT	11545751	11545885	AATAAGAAGAAAAGTCTGTTAAAGATCACATGGGAAGAAAGAAAGAGACATTAATTACTGTGTGGTGGTTTCTGGGTTTGTAGAGTTTGAAGATGAAAGAGAGAGAGAGAGAGAGAGAGACAAGAGGAAGAAGCA	GATGCTTTGGTGGGGGGATTTAAAAGATTCTTCAGCTTCCCGATATCCGACGGTAGTGTNNNNNNNNAACTTCAGAGATGGAG	11545766	11545788	-	0	39220_0188
2:11547986-11548165/17,28/-	0.964782	2	11548149	11548165	1	GATGAGTGTTTGGTGCC	11547986	11548013	1	ATTCCTTCCATTGCTCCGGTTTGCCAAT	11548014	11548148	AATAGAATACATACCCAAGTCAGGTAAGTAGGTAACAGAGTTATTATGAAAGAATGAATGTTACAGAGATTGTGTAATATTCAGAACCATATTGATACATCTTGCTGCTGCTGCTGCTGCTGCTGCTGCTTCCCC	ATTCCTTCCATTGCTCCGGTTTGCCAATCTTCAGCTTCCCGATATCCGACGGTAGTGTNNNNNNNNGATGAGTGTTTGGTGCC	11548019	11548046	-	0	39221_0189
2:11550998-11551177/18,27/+	0.933516	2	11550998	11551015	1	CATACATTCTCTAGTTCC	11551151	11551177	1	ACTCAATTTCGAAGCTTTGTGTCTGTT	11551016	11551150	TTCTCTCTTCTTCTTCTTCTTCTACCCCGCACGAACGTTTCTGGAGTATCTCTTTTCTCTTATCTTTCACTCCATTACAGAGCAAAGCTTGACTCTTTAAGTTCACATGGTGTGTTTTAAAGTTCCTTCTTTTTT	ACTCAATTTCGAAGCTTTGTGTCTGTTCTTCAGCTTCCCGATATCCGACGGTAGTGTNNNNNNNNCATACATTCTCTAGTTCC	11551015	11551038	+	10	39224_0190_SNP_a
2:11799900-11800079/18,27/-	0.93628	2	11800062	11800079	1	CCTAATGGACCAAATGAA	11799900	11799926	1	GAAGGTGATGTGTATGTTGAAGAGGCT	11799927	11800061	CTTACTGGTCAAGGATCAATGGATGGGAGTGGTTACAATGGTAGTGCAAGTGCAACGAATAAAGAGTTTGATGTTGATGTCGATGTTGATGTTGATGTTGATGTTGATGTCGATGTCGATGTCGAGGTTGAATAT	GAAGGTGATGTGTATGTTGAAGAGGCTCTTCAGCTTCCCGATATCCGACGGTAGTGTNNNNNNNNCCTAATGGACCAAATGAA	11799931	11799994	-	0	39427_0192
2:11824815-11824994/16,29/+	0.955718	2	11824815	11824830	1	TAAATCGGTGCGGCGA	11824966	11824994	1	TTGCCGTTGATTTGGCGTCTCACTTTCCG	11824831	11824965	AGAGAGAGAGAGAGAGAGAGACGAAGGCGATGATGATGTTAAACCCTAGCAATGGCGGAATCGAGGGAGAGAAGATGAAGAAGAAGGCGAAGGTGGTTGTGATAATGGGTCCAACAGGTTCTGGGAAATCAAAGC	TTGCCGTTGATTTGGCGTCTCACTTTCCGCTTCAGCTTCCCGATATCCGACGGTAGTGTNNNNNNNNTAAATCGGTGCGGCGA	11824831	11824851	+	10	39446_0193
2:11922929-11923108/25,20/+	0.969841	2	11922929	11922953	1	GCTTTCTTTAGTCTATTCTTGGGTT	11923089	11923108	1	CCGGCTCCAAGAACCTCGAA	11922954	11923088	CTAATGGCTCAGAAGAACTACTAAACCCTGACAAGTTATCATCATCATCATCATCATCCTCCATGGAAGTAGATTCACTTCTACTAATAATCTTTGAAGCATAAGAGATACAAAACTCTTCTAACATTTTCTGAG	CCGGCTCCAAGAACCTCGAACTTCAGCTTCCCGATATCCGACGGTAGTGTNNNNNNNNGCTTTCTTTAGTCTATTCTTGGGTT	11922991	11923011	+	0	39513_0194
2:11943005-11943184/20,25/-	0.974907	2	11943165	11943184	1	GAAGGTTAAGTACCATATAG	11943005	11943029	1	CGGTCGTTGTTGGCTGCTGTGGCAT	11943030	11943164	ATGATATTTGTTAAGTAGTAAGTCACTCAAAGTTTGAGTTTGGGTTTGAGTTTGAGTTTGAGTTTGAGTTTGAGAGACAAAAGATTACTACAAGAAGATTGTTAAACAAAAATGGAAGACTAATTTCCGGAGCCA	CGGTCGTTGTTGGCTGCTGTGGCATCTTCAGCTTCCCGATATCCGACGGTAGTGTNNNNNNNNGAAGGTTAAGTACCATATAG	11943091	11943134	-	0	39533_0196
2:11943508-11943687/16,29/+	0.852413	2	11943508	11943523	1	GAAAAAAGCTTAAGTA	11943659	11943687	1	GATGTGACTGTGTAATAATATATATGTTG	11943524	11943658	TGACGTATTTATAACATATTACCAGATCTTGGAAGCCATATATTAACCAGAGAAAGACCTGGTGAGATCTAGAACACAGATGAGAGAGAGAGAGAGAGAGAGATGTGTTTGTCTAAATATATATGCACAGTAAGA	GATGTGACTGTGTAATAATATATATGTTGCTTCAGCTTCCCGATATCCGACGGTAGTGTNNNNNNNNGAAAAAAGCTTAAGTA	11943601	11943626	+	0	39534_0197
2:11944416-11944595/17,26/-	0.764123	2	11944579	11944595	1	GGATCTCAATATGTGTC	11944416	11944441	1	ATTGCAATGCATCGACGACACCGGAG	11944442	11944578	AACAATCAATTTTTTGTATATATTAAAAACAACATTCAGATAATTCCTTGAATCTATATATTTTACTATCCCATCTATTTTTGGATATATATATATATATATACATATATATATATATATATATATATATATATCTA	ATTGCAATGCATCGACGACACCGGAGCTTCAGCTTCCCGATATCCGACGGTAGTGTNNNNNNNNGGATCTCAATATGTGTC	11944445	11944494	-	0	39535_0198
2:12075280-12075459/16,27/+	0.982724	2	12075280	12075295	1	GGTGGCATCGTAGTGG	12075433	12075459	1	CAGACAAAAGAGCAAAGACAGAGATGG	12075296	12075432	GATTCCCACCAATTTCACAAAATTTTGGTTTAAATTAATAGAAAAATCTAGAGACTTATCTTGATGATGAAGTGTTGTGTCATTGTGTGTGTGTGTGTGTGTGTGTGCAACTAATTTAACGATGAGTGATTTGACTT	CAGACAAAAGAGCAAAGACAGAGATGGCTTCAGCTTCCCGATATCCGACGGTAGTGTNNNNNNNNGGTGGCATCGTAGTGG	12075379	12075402	+	0	39656_0088
2:12084541-12084720/16,29/-	0.965542	2	12084705	12084720	2	CTTTGGTTTTAGTGGT	12084541	12084569	1	AAATTGAGTTGTTTGTTGGGGGACATATT	12084570	12084704	ATAAAATGGGTTCAAGAGACTTGTAACTTCAATCTGAATTGATCAAAACTCAATTTACTATAATCACAACAAAAAGGAACTCTAGAGAACAAGAATTCAACAAAGAAAGAAAGAAAGAAAGAAAGAAAAACTATA	AAATTGAGTTGTTTGTTGGGGGACATATTCTTCAGCTTCCCGATATCCGACGGTAGTGTNNNNNNNNCTTTGGTTTTAGTGGT	12084577	12084603	-	0	39663_0199
2:12485736-12485915/16,28/+	0.980017	2	12485736	12485751	1	AAGAACATAGGAGAGA	12485888	12485915	1	GCCTCTCGGTGACGCGGGGCAAAGACTA	12485752	12485887	AAGGGAAGAAGAAGAAGAAGAAGAAGAGTCAAGTGGTTGATTTTCGTACACTTCTCACTCATTGTGCACAAGCCATTTCCACAGGAGATAAAACCACGGCTCTTGAGTTTCTGTTACAGATAAGGCAACAGTCTTC	GCCTCTCGGTGACGCGGGGCAAAGACTACTTCAGCTTCCCGATATCCGACGGTAGTGTNNNNNNNNAAGAACATAGGAGAGA	12485756	12485778	+	0	40016_0201
2:12600266-12600445/16,27/+	0.980575	2	12600266	12600281	1	TACCTAAAAGTAGAGC	12600419	12600445	1	TCGTCTACCAGAGATGGTGTTCCGGAT	12600282	12600418	AATCTTAGAAAAAAAAAAAAAAAAAAAAAAAAAAGAAAAAGAAAAAGAAACAAGATTACAATGCATTTAAAAAGAGATGGAAAGAATCCGAGCTATCGAATCCAAAGAAGCATCAGCTTCCTCCATCTGTTCTTGTA	TCGTCTACCAGAGATGGTGTTCCGGATCTTCAGCTTCCCGATATCCGACGGTAGTGTNNNNNNNNTACCTAAAAGTAGAGC	12600288	12600336	+	0	40100_0202
2:12820998-12821177/16,29/+	0.980921	2	12820998	12821013	1	CGTAGATTACAACCGA	12821149	12821177	1	TTAGTTTACCGTTCCCACGACTCGTCGGG	12821014	12821148	ATATTCCATGTCTCTGATTTCCTATAACACGAGTCAACAAAGAAAAAGAAAAACTAAAACGCGCAACAACAACAACAACAACAACAAAAGTCAACCGACCAAACAAAGGGTCCGAAAATCAATCGACACGTTTTG	TTAGTTTACCGTTCCCACGACTCGTCGGGCTTCAGCTTCCCGATATCCGACGGTAGTGTNNNNNNNNCGTAGATTACAACCGA	12821077	12821100	+	0	40257_0203
2:12835005-12835184/18,26/-	0.939263	2	12835167	12835184	1	GGATTTGGTTACTATGAG	12835005	12835030	1	GGATTGGATTGGAAGAAACAGAGAGA	12835031	12835166	AAACACAGAAGAAAAAAAAACTGACCTGTTGAGAAATACCCTGTTCGATAAGAGATGGTGATTGGTTCATGGCCGTGTATTCAAAACTCTGCAATATTTCAGTTTAGTTTCTGAGAGAGAGAGAGAGAGAGAGATT	GGATTGGATTGGAAGAAACAGAGAGACTTCAGCTTCCCGATATCCGACGGTAGTGTNNNNNNNNGGATTTGGTTACTATGAG	12835033	12835054	-	0	40272_0204
2:12934663-12934842/16,29/-	0.979396	2	12934827	12934842	1	GTTTGTGCTATGGAGG	12934663	12934691	1	GCTCATCGGATGACCGGCATTTTGAAAAA	12934692	12934826	ATCTTCAGTATTTCACAAAGGTAGATGACAGTTCTCAACCCGAAGATGAAGAGAGTCCCGAGGTTAATGAAGAGGATGATGATGATGATGATGATGATAGTAGCAACCTAAGCCAGCCTGGGAATTCAAATACAA	GCTCATCGGATGACCGGCATTTTGAAAAACTTCAGCTTCCCGATATCCGACGGTAGTGTNNNNNNNNGTTTGTGCTATGGAGG	12934729	12934760	-	0	40343_0090
2:12967215-12967394/16,29/+	0.943471	2	12967215	12967230	1	GCTTGCCCTGTGACAA	12967366	12967394	1	GCATGTTCGAATAAATACATGGCTTGTTG	12967231	12967365	AGACATACCTTATATCTATAAGACAATAACGTATCTACGAGATATATATATATATATATATATATATATACGAGTGATGCCAAATTTAAAAGCCAGATCAATAAGTATCAACTAGAAAAACAAACAAAAAGACAT	GCATGTTCGAATAAATACATGGCTTGTTGCTTCAGCTTCCCGATATCCGACGGTAGTGTNNNNNNNNGCTTGCCCTGTGACAA	12967272	12967300	+	0	40365_0205
2:13001937-13002116/16,29/+	0.977618	2	13001937	13001952	16	TTCTCCTTCTTCCTCT	13002088	13002116	1	GGAGCTCTGTTTTGGATTTCATGAAAATC	13001953	13002087	ATAACTTTTTCGAGACCGCATTGTTTGGCAGCAAACTCAGGGAATACCAATGCAGGATCTCCAAATCCTGAATCCCTCCTAGGAGGAGGAGGAGGAGGAGGAGGAGGAGGAGGAGGAGGAAGCAGCTCCGACATT	GGAGCTCTGTTTTGGATTTCATGAAAATCCTTCAGCTTCCCGATATCCGACGGTAGTGTNNNNNNNNTTCTCCTTCTTCCTCT	13002033	13002072	+	0	40391_0206
2:13011615-13011794/16,27/+	0.979381	2	13011615	13011630	10	AAGAAGAAACAAAATC	13011768	13011794	1	GCTCAGTGTTGCCTGAGACTTGAGTTT	13011631	13011767	TTCCTTCTCTTGTGGATTGAAAGAGATTTAGAACTGAAAACGCCTGAGATTAAACCTCGCTTTTGGGGTTCCTGTTTGAAGAAAAGAGGGTTTTGTGTGTGTGTGTGTGTGTGTGTGTGTGTGTACTACAGTATTAA	GCTCAGTGTTGCCTGAGACTTGAGTTTCTTCAGCTTCCCGATATCCGACGGTAGTGTNNNNNNNNAAGAAGAAACAAAATC	13011724	13011754	+	0	40396_0207
2:13034244-13034423/17,28/-	0.981849	2	13034407	13034423	13	TGTTGCTGTTGCTGCTG	13034244	13034271	1	GTTTAAACTAAAAGAGCGAGTCCCTAAA	13034272	13034406	CTGCTGCTGCTGCTGCTCCTGCTGTTGTTGTTGTTGTTGTTGTTGTTGTTGTTGTTGTACTGGAAACAAAGTAGGATAATTCGAAGGAGGCATTGTCTGCTGATTAAGCTGAAGGAGAGGAGCTTTAGCATTTGA	GTTTAAACTAAAAGAGCGAGTCCCTAAACTTCAGCTTCCCGATATCCGACGGTAGTGTNNNNNNNNTGTTGCTGTTGCTGCTG	13034349	13034384	-	0	40416_0208
2:13085272-13085451/16,29/-	0.916284	2	13085436	13085451	2	GAAAAATATCGACAGA	13085272	13085300	1	GAGAGAAAGGTAAAGTAACAAGTCTCTCG	13085301	13085435	TTATAATGAATATGATGATGATGATGATGATGATGATGAGTCATCACTTTTTTTAAGCCCATGCCTAATTACGGTAAAATGAAAAAGGTGTTTTAAGGAAATAAGAAAAAAAAAACACAGTGAAGGAAGGGTTAA	GAGAGAAAGGTAAAGTAACAAGTCTCTCGCTTCAGCTTCCCGATATCCGACGGTAGTGTNNNNNNNNGAAAAATATCGACAGA	13085397	13085424	-	0	40457_0209
2:13094650-13094829/19,25/-	0.935786	2	13094811	13094829	1	ACCTAATCATGCACAAGAC	13094650	13094674	1	GAATTGCGGTATTGAGCCTGTCGCT	13094675	13094810	TTAGTAGTTTTAATATATATATATATATATATATATATTCCAAATCAAAGTAAAATGTCTCTTTTGTATGAATGAAGATTCTAACTCTGTTGTCCAAAAACAATATAAGATAGTATTTTAAAAGCGCACGAATTTA	GAATTGCGGTATTGAGCCTGTCGCTCTTCAGCTTCCCGATATCCGACGGTAGTGTNNNNNNNNACCTAATCATGCACAAGAC	13094773	13094798	-	0	40459_0210
2:13145739-13145918/23,22/+	0.969149	2	13145739	13145761	1	TCGGAAAGCTCTTGATCGATTAG	13145897	13145918	1	GCTGTTAGGTTTGGTTTCGCGG	13145762	13145896	AAGTGAATTGTTGCTGATCGATGGATCGAGAGAAGAAGGGTTTTAAGAGGTTTTCTTTGGTATAGCTATGAGTATAAGCTGAAGAAGACGAGGTTACAGAAGAAGAAGAAGAAGAAGAAGGAATTGGAGAAAAAT	GCTGTTAGGTTTGGTTTCGCGGCTTCAGCTTCCCGATATCCGACGGTAGTGTNNNNNNNNTCGGAAAGCTCTTGATCGATTAG	13145859	13145881	+	0	40497_0211
2:13166626-13166805/17,28/+	0.951705	2	13166626	13166642	1	GGGAAGCTTTGTGTTTG	13166778	13166805	1	GCTTCCAGTGAGTGATGTTAGTAATGAT	13166643	13166777	GAACTTGAGTTTATGGAGTTGAAAAAGGAGGCAAGATTGCTGGAGAAACCAAGAGAGAAAGAGAGAGAGAGAGAGAGTAGTAATGATTTGTTTGGAATTTAGGTTTTATGGGCAATGTATAGTGTAATGCGGGCT	GCTTCCAGTGAGTGATGTTAGTAATGATCTTCAGCTTCCCGATATCCGACGGTAGTGTNNNNNNNNGGGAAGCTTTGTGTTTG	13166694	13166719	+	0	40507_0213
2:13177817-13177996/22,18/-	0.981695	2	13177975	13177996	1	GGTGGAGGTGAAGATGCGGCGG	13177817	13177834	1	GAGTCCGTCGTGACGGAG	13177835	13177974	ATGGATTACCGAAGAAGAAGAAGAAGAAGAATAAGGGAGCTTGGAGGAAACGATATAATAGCAAGACGAATAAAAATCAAGATGGAGCTGTGGTTGAGGATGTCATCGATTGCGGTTGTGTATCATCAATCGTGCCGCCT	GAGTCCGTCGTGACGGAGCTTCAGCTTCCCGATATCCGACGGTAGTGTNNNNNNNNGGTGGAGGTGAAGATGCGGCGG	13177940	13177964	-	0	40518_0214
2:13185574-13185753/26,19/-	0.981816	2	13185728	13185753	1	TTTTTCTTCTCTTATAACTTGAAACG	13185574	13185592	1	GCTTGTTTCGATGTGTTAG	13185593	13185727	TTTGTGTGTATCTCTCTCTCTCTCTCTCTCTCTCTCTCTCTCTCTCTCTCTCTCTCTCTCTCTCTGATTGATTCTTTCGTGAACAATGTATTTCAATTTTCGTTTTGTGGGTTTTCTAGATCTAGCTCGGATTTT	GCTTGTTTCGATGTGTTAGCTTCAGCTTCCCGATATCCGACGGTAGTGTNNNNNNNNTTTTTCTTCTCTTATAACTTGAAACG	13185663	13185717	-	0	40524_0215
2:13194124-13194303/16,29/-	0.982084	2	13194288	13194303	1	GGAGATAACAATGAGG	13194124	13194152	1	GGAGAGAGGTCACGTGACTTTTAGGGGAA	13194153	13194287	ACACAGAGCATAATCGGAGAAGGCTCTATCGAGGAAGGAGGAGGAAGAAGAAGAAGAAGAAGAAGAAGAAGAAGGACGAGGGACAGAGAGAGAGGAAGGTCACGTGGGAAGGAAGGAGATAGTGAAGAAAGATGG	GGAGAGAGGTCACGTGACTTTTAGGGGAACTTCAGCTTCCCGATATCCGACGGTAGTGTNNNNNNNNGGAGATAACAATGAGG	13194214	13194244	-	0	40529_0216
2:13291114-13291293/16,26/+	0.953948	2	13291114	13291129	1	GAGCCCGTACACAAGA	13291268	13291293	1	CGAGGACAAGAACCGTACCTTCAAAC	13291130	13291267	TTTGACCAAGAGAACTATTTTAACTTTAAATAAATATATATATATATATATATCCATAAAAAGCATTAATCAGATTCCATTTTGATTGATATATATGATAAAATATGTAAACTTACAATGGCAAAACAAAAGTACAAA	CGAGGACAAGAACCGTACCTTCAAACCTTCAGCTTCCCGATATCCGACGGTAGTGTNNNNNNNNGAGCCCGTACACAAGA	13291159	13291182	+	0	40629_0217
2:13417283-13417462/16,29/-	0.972178	2	13417447	13417462	2	TCTATCCTGTTGTGTG	13417283	13417311	1	CCTGTGGTAGTTTTCTGAAGTAGCTAAGC	13417312	13417446	ACAGAGAAGAAGAAGAAGAAGAAGAAGAAAGTGCTTAAGGCTTTCAGATAGATGTAGGAATATAATTTGTGCGAAACCCTATGTAAGTGACTAAGTCTGCTATATTTAAACCACAAGGCATACATAATGTTAGGT	CCTGTGGTAGTTTTCTGAAGTAGCTAAGCCTTCAGCTTCCCGATATCCGACGGTAGTGTNNNNNNNNTCTATCCTGTTGTGTG	13417418	13417442	-	0	40720_0218
2:13430933-13431112/17,28/+	0.954544	2	13430933	13430949	1	CAATTCCACACACACGA	13431085	13431112	2	GCGTAAAGGAATTTGCTTCCTGGAAGAG	13430950	13431084	ATCATATATATATATATATATATATATATATATATATATACAAATAAGAGAACTTGTGGAACAAGAAAGATCTTTATGTACATACCGTATTTGCTAGGGTTTTGGATCATCTCCATCATAGGATTATAGACATCG	GCGTAAAGGAATTTGCTTCCTGGAAGAGCTTCAGCTTCCCGATATCCGACGGTAGTGTNNNNNNNNCAATTCCACACACACGA	13430953	13430989	+	0	40727_0219
2:13615291-13615470/16,29/+	0.961391	2	13615291	13615306	1	GCTCATTGGTGCCTTG	13615442	13615470	1	GGTGGAGTTGACAAAGATCGGGTTTTACG	13615307	13615441	TTAGTTAAAATTGATTACACATAATTTTTTGTTGGCCCAAAATATATATATATATATATATATATATTCAAAACAAGTAGCTATATGTTTTTTACTTTCATAGTGAGAATCACAAATCTAAGAGGCTTAAAAAGA	GGTGGAGTTGACAAAGATCGGGTTTTACGCTTCAGCTTCCCGATATCCGACGGTAGTGTNNNNNNNNGCTCATTGGTGCCTTG	13615348	13615373	+	0	40877_0220
2:13643839-13644018/20,22/-	0.971892	2	13643999	13644018	1	GGAGGAGGAGGAGCTGAAGG	13643839	13643860	1	GGAGAAGACGTCGGCGACGAGG	13643861	13643998	CGGAAGAGCGGTAACCGGAGGAGGAGGAGGAGGAGGAGGGAGCGATGTGGAATTGGTGAGCAAGACGTTGCAAGTGGAGCATAAGCTATTCTATTTTGATCTTAAGGAGAATCCTCGTGGAAGGTATCTAAAGATATC	GGAGAAGACGTCGGCGACGAGGCTTCAGCTTCCCGATATCCGACGGTAGTGTNNNNNNNNGGAGGAGGAGGAGCTGAAGG	13643960	13643982	-	0	40905_0221
2:13656968-13657147/16,29/+	0.982344	2	13656968	13656983	2	TTGAGGTCCCGTTGGG	13657119	13657147	1	GGAACTTGTTCTGGGACAGCAAAATCTGT	13656984	13657118	ATCACTGATACATTAGAAGAAGAAGAAGGAGAAGAAGAAGCTATTGCCATCCGATCTCGAGTTCTTTCTTAGAAACAAAAGGAGTTTGATCGATTCTTGTTTGAAAGAAAAGAAGAATCTGGAAGACGCAATGAA	GGAACTTGTTCTGGGACAGCAAAATCTGTCTTCAGCTTCCCGATATCCGACGGTAGTGTNNNNNNNNTTGAGGTCCCGTTGGG	13656998	13657023	+	0	40912_0222
2:13664076-13664255/16,24/+	0.982827	2	13664076	13664091	1	TGTTAGAGGTGAGAGG	13664232	13664255	1	GGAATATAGTTCGAGACTGGGGAG	13664092	13664231	TGACACGCACACCAGTACAATTGTATATATATATATATATATATATGTTGGATGTTGTGTGTATTGCTCACCAATCTATTACTTAGAAATGTGCATGCATGGTTTTTGTTGTATTCTAACACAGGTTCGTTGGGTAATAA	GGAATATAGTTCGAGACTGGGGAGCTTCAGCTTCCCGATATCCGACGGTAGTGTNNNNNNNNTGTTAGAGGTGAGAGG	13664115	13664137	+	0	40919_0223
2:13675928-13676107/17,27/+	0.912128	2	13675928	13675944	1	CTTTTTTTTGGGCGCGA	13676081	13676107	1	CATTATTCTTTGCATCATCCAGGGGCG	13675945	13676080	TATATATATATATATATATATATATATATATATATATATATATATATATATATATGCGACTGAGTCACGAGAAGTCGTATTTATAATTGGTCTATAAAGAAACGTCAAATATTATACCTAAAATATTAAAAATTAA	CATTATTCTTTGCATCATCCAGGGGCGCTTCAGCTTCCCGATATCCGACGGTAGTGTNNNNNNNNCTTTTTTTTGGGCGCGA	13675944	13675999	+	10	40924_0224
2:13725801-13725980/17,28/+	0.92111	2	13725801	13725817	1	GCAATAAAGCTTACAGA	13725953	13725980	1	ATCAATACCGAGAGGAAGCAAAACAGAG	13725818	13725952	TTTGATATATTAATCACACTTGTCATTAGGTATCATCATCATCATCATCATCATCATCATCATCAGAAAACCAACAAGATCATCATGAACAAGTTGTACCACCAAATGAACTTGATCCATTGACCATCCAGAGAA	ATCAATACCGAGAGGAAGCAAAACAGAGCTTCAGCTTCCCGATATCCGACGGTAGTGTNNNNNNNNGCAATAAAGCTTACAGA	13725849	13725882	+	0	40951_0225
2:13824542-13824721/17,28/+	0.971555	2	13824542	13824558	4	AACACACTCTCTCTCTC	13824694	13824721	1	ATTTTATTGTGTCCATGAGTTGGTTAGG	13824559	13824693	TTGATTTTAACAACTTGGCAACTTCATTCAATTTCAAGTTCCAAAACAAGAGAGAGAGAGAGAGAGAGAGAGAGAGAGAGAGAGAGAGAGAGAGAGAGAGAGAGAGAGAGAGAGAGAGAGAGAGAGATAAAGAAT	ATTTTATTGTGTCCATGAGTTGGTTAGGCTTCAGCTTCCCGATATCCGACGGTAGTGTNNNNNNNNAACACACTCTCTCTCTC	13824607	13824685	+	0	41013_0226
2:13860013-13860192/17,28/-	0.982746	2	13860176	13860192	6	TTTGTGGTCTTCCTCTC	13860013	13860040	1	GGATTATTGCTTGGATTGGCAATAGCAC	13860041	13860175	AAGGAAAGTTGCTTCGGCACTGGTGCACCTCCGATGTATCACCAAAAGCAAGAAGACAAAGAAGAAGAAGAAGAAGAAGAAGAAGAAGAAGAAGAAGTGTTGAACGGGAGAGCAGTGGCAATAGGGTATGGATCT	GGATTATTGCTTGGATTGGCAATAGCACCTTCAGCTTCCCGATATCCGACGGTAGTGTNNNNNNNNTTTGTGGTCTTCCTCTC	13860079	13860130	-	0	41026_0227
2:13873275-13873454/16,29/+	0.981699	2	13873275	13873290	2	AAACTAAAGTGAAAAA	13873426	13873454	1	ACCCTAACTCCGATTTTTCTCACACCTCC	13873291	13873425	ATAGCAAAGTACATTACTCACAGTAGTGAAGAAGCAGCCACCTGAAAAAAAAAATAACACACACAAAAAAAGAGAGAGAGAGAGAGAGAGAGAGAGAGAGAGAGAGAGACCCCACAAAGAGCACTAATCTTCACA	ACCCTAACTCCGATTTTTCTCACACCTCCCTTCAGCTTCCCGATATCCGACGGTAGTGTNNNNNNNNAAACTAAAGTGAAAAA	13873361	13873399	+	0	41039_0228
2:13876076-13876255/19,26/+	0.988135	2	13876076	13876094	13	TTCTCTTTCTCTTTCTCTT	13876230	13876255	1	CATCGAAACTTCGTCGCGTCTTTGCT	13876095	13876229	GCTCTTGTGTGAGTCCATTGTACTTTCCACTCTGTGAGATTTGTGCCCACTATATTATCTTAAATATGTAATTCGTACCCACTCACTACATATCATCATCATCATCATCATTATGGTGATCGTCTTTTGATCAAT	CATCGAAACTTCGTCGCGTCTTTGCTCTTCAGCTTCCCGATATCCGACGGTAGTGTNNNNNNNNTTCTCTTTCTCTTTCTCTT	13876183	13876205	+	0	41047_0229
2:13906204-13906383/18,27/-	0.911348	2	13906366	13906383	1	AGTAAATAAAAGAAATAC	13906204	13906230	1	GTCGAGGAACTCCGGTAAAGTATCTCC	13906231	13906365	TCAAGAAAAATATAAATATGAGCTTAACTATAATCTAAGAAAAGCATAGTCTCTCTCTCTCTCTCTCTCATAATACATAGAGGAGAATAAAAAAATGATGTGTTTCCAAAACTTCAAAGTTCGTAAATTCTTTAC	GTCGAGGAACTCCGGTAAAGTATCTCCCTTCAGCTTCCCGATATCCGACGGTAGTGTNNNNNNNNAGTAAATAAAAGAAATAC	13906297	13906316	-	0	41068_0230
2:13925731-13925910/18,27/+	0.968931	2	13925731	13925748	1	AACCCTAACGATCAACAC	13925884	13925910	1	GAACGTTGCTTTGATGTTCTTCGATAC	13925749	13925883	TTGAAGAAGAAGAAGAAGAAGAAGAAGAAGAAGAAGATGGTGATGAAGATTGCGATAGCAACAGAGAGAACAGATCTTCCTCGTTTGGTATCTACTGCAATTAGAGCTTCTAATTCGCAGAATGCTTCTGATGTT	GAACGTTGCTTTGATGTTCTTCGATACCTTCAGCTTCCCGATATCCGACGGTAGTGTNNNNNNNNAACCCTAACGATCAACAC	13925751	13925785	+	0	41076_0231
2:13997543-13997722/22,23/-	0.980114	2	13997701	13997722	1	GTCAAGCTTCGACGATTTAGCT	13997543	13997565	1	GTTGCTTTTGTCTTTGCTTGAGC	13997566	13997700	GTTCATAAAACAAGGAGACAAAACAATGATCAAAATGAAGAAGAAGAAGAAGAAGAAGAAGAAGAAGATGGTAATAACAATGGGAACCGGAGACTATCTTGGCCTCCTTCTGTAAAAAAGAGTAGCGTTTAAACA	GTTGCTTTTGTCTTTGCTTGAGCCTTCAGCTTCCCGATATCCGACGGTAGTGTNNNNNNNNGTCAAGCTTCGACGATTTAGCT	13997633	13997664	-	0	41105_0232
2:14123951-14124130/16,29/+	0.970873	2	14123951	14123966	13	AACAAATAAAAAGAAA	14124102	14124130	1	CCAGATATTGAGCTTCCACATTCGACTTG	14123967	14124101	TAGAAATTTTCACCTGAAGAAGATGAAGAAGAAGAAGAACCCGAAGAGCCAGAGCTAGGATAAGGAGAAGATCTCTTGGGAACACCATTTGGGTAGAAACTATAACCGACAAAACACTTATGAAGATATATCTGA	CCAGATATTGAGCTTCCACATTCGACTTGCTTCAGCTTCCCGATATCCGACGGTAGTGTNNNNNNNNAACAAATAAAAAGAAA	14123982	14124005	+	0	41172_0233
2:14142196-14142375/20,23/+	0.968402	2	14142196	14142215	1	GAGAGAACAGTTTCCAGTGG	14142353	14142375	1	GGGATTCACGGAGGGCCGAGAAA	14142216	14142352	AAGAAGAAGAAGAAGAAGAAGTCGAAAAAGTTGGAGGCTGGGGCATGAAGTTTCTCAAGAAAATTCCCTTAGCTCGAACCAAGGATGCTTCTAAATGTTCTAAGCATTCCACAAGCATAGATGTTGTGATTCCTTTA	GGGATTCACGGAGGGCCGAGAAACTTCAGCTTCCCGATATCCGACGGTAGTGTNNNNNNNNGAGAGAACAGTTTCCAGTGG	14142215	14142236	+	10	41183_0234
2:14195195-14195374/17,25/+	0.980501	2	14195195	14195211	1	GACAGTGGAGACTCATA	14195350	14195374	1	GCTAGTGGTTGCTGGTTGCAAAGCT	14195212	14195349	TGGAACCGTGTGTTCAGAAGAAGATAGCTCATATTACGACAGCGAAGAGTCTTCATCAGAGTCATCTCCATCATCAAGAGAGAATCATAAAGAAGAAGAAGAAGAAGAAGAAGAGGAGGAAGAAGAAGAAGAAGATGT	GCTAGTGGTTGCTGGTTGCAAAGCTCTTCAGCTTCCCGATATCCGACGGTAGTGTNNNNNNNNGACAGTGGAGACTCATA	14195301	14195346	+	0	41222_0235
2:14217471-14217650/16,28/-	0.922007	2	14217635	14217650	1	GGATCTGAGGGAGTTG	14217471	14217498	1	GATGAGGTTGTGGTAGTAAGGAGGAAGG	14217499	14217634	AATCGTACTTCTGAGAAGCTGCTGCAGTTGTCGTTGAGAGAGAGGTGGTGAAATTCTCCGCCGAAGTGAAGTTCGATGAGGAGAGTAAGGTGGTGGTGGTGGTGGTGGTGACGGCGGAGCAGGGACGAGCGGTGGA	GATGAGGTTGTGGTAGTAAGGAGGAAGGCTTCAGCTTCCCGATATCCGACGGTAGTGTNNNNNNNNGGATCTGAGGGAGTTG	14217525	14217546	-	0	41230_0236
2:14331218-14331397/17,27/+	0.983607	2	14331218	14331234	1	TTTGATGAACACGCGAG	14331371	14331397	1	TTGGTTAATGCCCCGACATCTGTTTCC	14331235	14331370	ACAGTGTAGATGTAGATAGATACAGCTATAGAAGAGAGAGGCACAACAACAACAACAACAACAACAACAACAACAAAAGTGGTTTAGAGATTGGGGCAGGACCCGGACAAAACGGGTTACAAATCCAAATACCCAA	TTGGTTAATGCCCCGACATCTGTTTCCCTTCAGCTTCCCGATATCCGACGGTAGTGTNNNNNNNNTTTGATGAACACGCGAG	14331277	14331310	+	0	41308_0237
2:14342631-14342810/21,21/+	0.981458	2	14342631	14342651	1	GGCAGTAGAAGTAGTGGGAGG	14342790	14342810	1	GTGTTGTTGATGATGAGTTCC	14342652	14342789	AATATGAAGCATGATGTTATTGTTGTTGTTGTTGTTGTTGTAAGAAGCTATTTGATGATTAGTGGTAGCGTAACAAATCTGAGTCTGTGGCTGTTGCAACATCTTCATCCTCATTTCTTCAACTTCTTTCTCACTCAA	GTGTTGTTGATGATGAGTTCCCTTCAGCTTCCCGATATCCGACGGTAGTGTNNNNNNNNGGCAGTAGAAGTAGTGGGAGG	14342666	14342692	+	0	41320_0238
2:14373765-14373944/25,20/+	0.944145	2	14373765	14373789	1	GGGTTTTGTTAAGTGATTGAGGTTG	14373925	14373944	1	ACTTACCCCAATTAGGTACT	14373790	14373924	AAGAGGAGAGAAGAGAAGAGAAGAGAAGAGAAGAGAAGAGAAGAGCGAGATTGCTTTTAGATATTGCAACTATTCTTACTAAAGTTTCCCTGCTCATATAACTGAGATCTACAAGCACCATGTTAATATTTTAAT	ACTTACCCCAATTAGGTACTCTTCAGCTTCCCGATATCCGACGGTAGTGTNNNNNNNNGGGTTTTGTTAAGTGATTGAGGTTG	14373789	14373834	+	10	41339_0239_SNP_a
2:14401408-14401587/18,27/+	0.968673	2	14401408	14401425	1	CGTAGCATATACTTTGCG	14401561	14401587	1	CTTACCTTCTGTATCGATTCGTCAACC	14401426	14401560	TTGATGATGATGATGATGATGATGATAAAAGAACATAGGTTTAGTCTTTTAGCCACACAACATAGACAGAACCATAAACTCTTGAATTTTAGGGCATAAACATCAAATAAAGATCAAACCAGAAGAACAAGAGTA	CTTACCTTCTGTATCGATTCGTCAACCCTTCAGCTTCCCGATATCCGACGGTAGTGTNNNNNNNNCGTAGCATATACTTTGCG	14401427	14401451	+	0	41355_0240
2:14482755-14482934/16,29/+	0.945494	2	14482755	14482770	1	CATATAAGAAACATGC	14482906	14482934	1	GGTGAGTATACGGATGCCCACTATTTTGG	14482771	14482905	TACTTTGTTTGTTTGTTTGTTTGTTTGTTTATTTGTTGTAATCAAATCGATCGGTCGTGAGAATGACGGCTATCGCACCGATGTTATCTAAAGGCAAAGCTCATATATACGAGATATCACTTCATATTATGACCT	GGTGAGTATACGGATGCCCACTATTTTGGCTTCAGCTTCCCGATATCCGACGGTAGTGTNNNNNNNNCATATAAGAAACATGC	14482774	14482807	+	10	41426_0241_SNP_a
2:14518432-14518611/16,29/+	0.985438	2	14518432	14518447	1	CCAAACCAACCAACAA	14518583	14518611	1	GCTATTGTATTTCTAGGGTTTCGGATCCT	14518448	14518582	CCGTTTGGGTGAGCTTGACGAGAACGACGTCGCACCCGCCATTTTCTCCATCCTTGAAGCAACACCTTCTTCACTTCAGATCTCTTCTTCTTCTTCTTCTTCTTCTTCTTCTTCTTCTTTGCTCGCACCTTCCGT	GCTATTGTATTTCTAGGGTTTCGGATCCTCTTCAGCTTCCCGATATCCGACGGTAGTGTNNNNNNNNCCAAACCAACCAACAA	14518530	14518566	+	0	41446_0242
2:14541158-14541337/17,26/+	0.980616	2	14541158	14541174	1	GTATGGTGCAAGAGAGG	14541312	14541337	1	GTCTTTCTTGGTGTTCTTTGTTTGGT	14541175	14541311	CAAATATAGAAACAGAGAAAACCATGTTTCTTTGTTTCTAGCTTGTCTTAATGGTTTTTGCGTATATATGGAAATGATTTGAGTAACGAGAAGAAGAAGAAGAAGAAGGTTTTGCTTTGTAGTCTTGCCTGCCTTTT	GTCTTTCTTGGTGTTCTTTGTTTGGTCTTCAGCTTCCCGATATCCGACGGTAGTGTNNNNNNNNGTATGGTGCAAGAGAGG	14541263	14541282	+	0	41460_0243
2:14548089-14548268/16,29/-	0.945745	2	14548253	14548268	1	GGATTAGCATCTAAAG	14548089	14548117	1	GGTTTGTTTCAGGGAAGAAGCTGATTCTG	14548118	14548252	GTGCTTTGATGGGGATAACGAAATCGTCTTGGTAGCTGCATTATGTGACTGATCTATGTAAGTGTTTTTGATTCTCCTTATTTTTCTGTGTTTGCTTAGTTACTTAGATGATGATGATGATGATGAATGAATGAT	GGTTTGTTTCAGGGAAGAAGCTGATTCTGCTTCAGCTTCCCGATATCCGACGGTAGTGTNNNNNNNNGGATTAGCATCTAAAG	14548117	14548146	-	10	41464_0244_SNP_a
2:14622951-14623130/18,27/-	0.980252	2	14623113	14623130	1	CTGTTGTGAACTAGCGTC	14622951	14622977	1	GCCTGTTTGGATTTTTTTGCTGGACTG	14622978	14623112	TACTAGTTCTCGTTATTGGGCATGGCATGTTTTTTTTTTTTTTTGTTTTTTTCTTTTTTTTTTAATATATATATATATATATATCTTGGTGATAACGCTTAGCATTTGATTTGACGTATTTTATCCATTAGAACT	GCCTGTTTGGATTTTTTTGCTGGACTGCTTCAGCTTCCCGATATCCGACGGTAGTGTNNNNNNNNCTGTTGTGAACTAGCGTC	14623029	14623048	-	0	41521_0245
2:14702473-14702652/17,28/+	0.984258	2	14702473	14702489	1	GTTTACTTTCGTTTGGA	14702625	14702652	1	CAGATCACCTCTTCAACCTCAGAAACAA	14702490	14702624	TTTTGGAATTAGACGCGAAGCTGTGAAATCTAGAAGAAGAAGAAGAAGAAGAAGAAGAAGAAGAAGAAGAAGAAGAAGAAGAAGAAGAAGAAGAAGAAGAAGAAGAAGAAGCAATGTCAGCCATGGGAGCAGGAC	CAGATCACCTCTTCAACCTCAGAAACAACTTCAGCTTCCCGATATCCGACGGTAGTGTNNNNNNNNGTTTACTTTCGTTTGGA	14702521	14702600	+	0	41598_0246
2:14792833-14793012/16,27/+	0.97432	2	14792833	14792848	1	CGGAAATCAGAAGAAC	14792986	14793012	1	GTGGCAGCAGTTGGATCTAGCATGTTG	14792849	14792985	TAATAATATATATATATATATATATATATATATATATATATATGTTTTGTGTATTTCAGGGTTTTAATGAGTTGAAAGCTGAGTTCGAAACAACAAAATATGAGGCCGTGAAGTATGCTGCATATACACTCGTCGCT	GTGGCAGCAGTTGGATCTAGCATGTTGCTTCAGCTTCCCGATATCCGACGGTAGTGTNNNNNNNNCGGAAATCAGAAGAAC	14792851	14792891	+	0	41653_0247
2:14843474-14843653/19,26/-	0.945568	2	14843635	14843653	1	GGGTGGTGGTAGATACTGG	14843474	14843499	1	GGGATATATGGCCGCTGCTCATTACC	14843500	14843634	TTAGGTTGAAGAGGGCCCTGCATGTTCATTCGAGGTTGCGGTCCAGGCATCATATGTTGCTGAGGTTGAGGTTGAGGTTGAGGTTGAGACTGAGACTGAGATTGAGCTGGCATATATGACCGCTGCTCATGACCT	GGGATATATGGCCGCTGCTCATTACCCTTCAGCTTCCCGATATCCGACGGTAGTGTNNNNNNNNGGGTGGTGGTAGATACTGG	14843529	14843574	-	0	41680_0248
2:14871616-14871795/19,26/-	0.980094	2	14871777	14871795	1	GACAATAGGAAGTAGAGAG	14871616	14871641	1	GCTGAACCGGAGCTCTGCAACAAGGA	14871642	14871776	ACGGAGCCATAAACAAACAAACAAACAAACAAAAAAGTATTACACCTGACAAAAGAAGTTGTGCTGTGATTAATCTTTGGACCCCAGATAATTATCTTTGTTACTAAGAACTCGCTCCAAAGACACGGATTCTCT	GCTGAACCGGAGCTCTGCAACAAGGACTTCAGCTTCCCGATATCCGACGGTAGTGTNNNNNNNNGACAATAGGAAGTAGAGAG	14871741	14871766	-	0	41695_0249
2:14890187-14890366/16,29/+	0.95872	2	14890187	14890202	1	GCTGACGGTGGGAGTT	14890338	14890366	1	GGTATTACAGCAACAATAAAGGAATCTAC	14890203	14890337	TAAACTTCTGCAATGCCAAAAGAGATTTTATAAGGACAGAAACTAAAAAACCATTCTTTACCAGTTAAGAAACCATTCTTTACCAAATCATCATCATCATCATCATCAAATGACTCAACTCCAGCTGGTGGATTT	GGTATTACAGCAACAATAAAGGAATCTACCTTCAGCTTCCCGATATCCGACGGTAGTGTNNNNNNNNGCTGACGGTGGGAGTT	14890289	14890310	+	0	41706_0250
2:14922253-14922432/20,20/-	0.982231	2	14922413	14922432	1	ACTTGAATCCGGAGGCAGAC	14922253	14922272	1	AACCGCTGTCCCGATACACG	14922273	14922412	TATACAGAAAAGAAAAGAAAAGAAAAGAAAAGAAAAACACAGAATGTCATATCCGTATCCAGGACATTCCCAAGCTAATCTTTTAACAACAAACAGATACAAGGGAAACTTGTAAACACATTAATAAACTAACCAGCAAG	AACCGCTGTCCCGATACACGCTTCAGCTTCCCGATATCCGACGGTAGTGTNNNNNNNNACTTGAATCCGGAGGCAGAC	14922377	14922407	-	0	41720_0251
2:14926189-14926368/19,24/-	0.974683	2	14926350	14926368	1	GGGCTTTTCGAGGGTTTCT	14926189	14926212	1	GCTGTATTGGTCAACGATCAATAG	14926213	14926349	ATATATACTTCTCGGTTTTGTGTTATTGTGTTTCTCCGGTCCGACATTGTTATTTACCTGTTTCTGCATCTTGAGAAAAAGACTAGACCTTTAAGCTGTTGTTGGATTATCAATATATATATATATATATATATATA	GCTGTATTGGTCAACGATCAATAGCTTCAGCTTCCCGATATCCGACGGTAGTGTNNNNNNNNGGGCTTTTCGAGGGTTTCT	14926213	14926237	-	0	41721_0252
2:14980907-14981086/24,21/-	0.979114	2	14981063	14981086	1	GGGTTATAGTTTTGCCGGTGAGGG	14980907	14980927	1	GTCGGCGTTTAGACTACGCCA	14980928	14981062	TTTTGACGAAGATCTGCATTATCTCTTCTTCTCTCTCGGATTCTTAGGGGGGTCTGTGCGATGGGGAATAGTAATTAGTCTGTTTATATATATATATATATATAGGCACTGGTAAAGGTATGAGAGGGCCTCTGG	GTCGGCGTTTAGACTACGCCACTTCAGCTTCCCGATATCCGACGGTAGTGTNNNNNNNNGGGTTATAGTTTTGCCGGTGAGGG	14980959	14980978	-	0	41748_0253
2:14985410-14985589/16,29/+	0.982005	2	14985410	14985425	1	TAAATGACAACAAAGA	14985561	14985589	1	CAGAGATTATCGAACACGAAGCAGAAGAC	14985426	14985560	ATTTGAAAAATAATAAAATAAAATAGAAATGACAACAAAGAAATAAGCCCCACTTGGCCGATTGAAAGAAAATATCCAGTTGACTCCAAATAGACTAGAAAGAGAAAGAAAGAGAGAGAGAGAGAGAGAGAGAAC	CAGAGATTATCGAACACGAAGCAGAAGACCTTCAGCTTCCCGATATCCGACGGTAGTGTNNNNNNNNTAAATGACAACAAAGA	14985522	14985558	+	0	41752_0254
2:14992740-14992919/16,28/+	0.981965	2	14992740	14992755	1	GGGGGAAGGAAGTGGT	14992892	14992919	1	GATGATGATGTTGATGTTGATGAAAACA	14992756	14992891	AATGGTTTCTGATGATGATGATGATGATGATGATGATGTTGATGATGATAAAAATATCATCAAATGTGTCAAACCTCTTACAGTATACAAGAATCTTGAAACTCCAACGGATTCTGATGATAATGATGATGATGAT	GATGATGATGTTGATGTTGATGAAAACACTTCAGCTTCCCGATATCCGACGGTAGTGTNNNNNNNNGGGGGAAGGAAGTGGT	14992765	14992804	+	0	41756_0255
2:15218423-15218602/19,26/-	0.948183	2	15218584	15218602	1	CTGTTATATAATAAAGGAG	15218423	15218448	1	CTCTCTTCATCAAGCTCTGCTTCTGG	15218449	15218583	AACGAGAGGTTGAGGAAGAAAGCTCAGATTCTGAACCAAGAGAATCAACAACTTCTCTTCGAACTCAAACAAAAGCTCTCGAAAACCAAGAACTCTAGTGGATCAAATCAAGGAAACAACAACAACAACAACAAC	CTCTCTTCATCAAGCTCTGCTTCTGGCTTCAGCTTCCCGATATCCGACGGTAGTGTNNNNNNNNCTGTTATATAATAAAGGAG	15218449	15218469	-	0	41898_0256
2:15229050-15229229/16,29/+	0.717233	2	15229050	15229065	2	TTTTATTTGTTTGTCC	15229201	15229229	1	ATTTTTGTGTCCCAATCTCTTCTTCATTT	15229066	15229200	ATCATCATCTTCATCATCATCATTTCGCCGTTAAGTTTCTCTCTCTCTCTGTTTCCACCCATTATAGAATTCAGTGAATCAACAACAACAAGGTAACACATCTCTCTCTCTCTCTCTCTCTTTCTCTCTTTTTAT	ATTTTTGTGTCCCAATCTCTTCTTCATTTCTTCAGCTTCCCGATATCCGACGGTAGTGTNNNNNNNNTTTTATTTGTTTGTCC	15229065	15229194	+	0	41904_0257
2:15266887-15267066/16,29/+	0.938917	2	15266887	15266902	3	TTGTTTTGGTGTTTTC	15267038	15267066	1	GCTGAAGGCCTAAAAAGTACTCCATTGTT	15266903	15267037	TAGAGATAATCGAAACTCTTTCAGGATGTAGACATCCAATAAAAACATAATATGTAGTATTTAAGTCATAACTGGTATCCAGCATTATCTATGGGTATATGTGGTTTCATATATATATATATATATATATCCCTC	GCTGAAGGCCTAAAAAGTACTCCATTGTTCTTCAGCTTCCCGATATCCGACGGTAGTGTNNNNNNNNTTGTTTTGGTGTTTTC	15267011	15267032	+	0	41915_0258
2:15269840-15270019/16,28/-	0.98042	2	15270004	15270019	5	AGGAGAAGAAGATCAA	15269840	15269867	1	GCGTAAACTACAGCGGTTCTGCACGGTG	15269868	15270003	CGAGTAAATTTTTGTAGTACAAAGAAGCTTACAGTAGGTAAACTCGGACAACTGTCTTTGCTCCTAAACATCTTCGGGTAACAGGCCTATGGGGACAAGAGAAGAACGTTCATCATCATCATCATCATCTACTGCA	GCGTAAACTACAGCGGTTCTGCACGGTGCTTCAGCTTCCCGATATCCGACGGTAGTGTNNNNNNNNAGGAGAAGAAGATCAA	15269875	15269894	-	0	41916_0259
2:15299703-15299882/16,27/-	0.935627	2	15299867	15299882	1	TGGCTCACGACGAAAG	15299703	15299729	1	GTGTTTTCGGTGAAGAAGCTTAAGTGG	15299730	15299866	CTCAATTCTCCGACGTCGGAAGGAAACACGAGATACAGATTCAATGCGGCGGAGGAGGAGGAGGAGGAGGAGAGGAAGGGTATTTATGGAAAGTGAAAAGTCCTGAAACGATGTCGGTTTATGTTGATAAGAGGAAA	GTGTTTTCGGTGAAGAAGCTTAAGTGGCTTCAGCTTCCCGATATCCGACGGTAGTGTNNNNNNNNTGGCTCACGACGAAAG	15299791	15299816	-	0	41937_0260
2:15328165-15328344/16,28/+	0.982767	2	15328165	15328180	9	TGTGTGTGTGTGAGTG	15328317	15328344	1	GATCTCTCTAAAGTGTTTCAGTGCTTCA	15328181	15328316	TGTGTTTGTTTGTCTATATATATATATATATATATGTATAAACTTTCGTGTTCTTTTTTCTTGTTAGGATCAAGAAAAGTGTACGGACAGTGGATATAAAACGCTTGAGAACAGTGACAAGCCTCTGTTCTTTAAG	GATCTCTCTAAAGTGTTTCAGTGCTTCACTTCAGCTTCCCGATATCCGACGGTAGTGTNNNNNNNNTGTGTGTGTGTGAGTG	15328195	15328220	+	0	41951_0261
2:15414499-15414678/27,18/-	0.972884	2	15414652	15414678	1	CTTCCAAGTTTTTTATTCTTTTTCATG	15414499	15414516	1	CCCGCCAATTTCTTCCTC	15414517	15414651	AATCAACAAATATAAGATTAAAGTATGCACTGACATTTAGACAAACACACACACACACACACACACACACACACACACAATCGGAATCAAAGCAAAAAAGAACTTAGAGATAGGTCCTCATGGCTTTCGAGAAGA	CCCGCCAATTTCTTCCTCCTTCAGCTTCCCGATATCCGACGGTAGTGTNNNNNNNNCTTCCAAGTTTTTTATTCTTTTTCATG	15414573	15414611	-	0	42022_0262
2:15471755-15471934/16,25/+	0.919714	2	15471755	15471770	1	CAAGCAAGTTAGGAGT	15471910	15471934	1	GCTTTGTGGGCTAGTTTTCTAGACG	15471771	15471909	AAAAAGTTTTTTATTAATGATATATATATATATATATATATATATATATATATATATTTGTTTATTAGTATAAATAATTGAATGTGAAAACATTATCATAAAACACCAAAGGAGGAAAAGAGAAGAATGGGTCACTAAA	GCTTTGTGGGCTAGTTTTCTAGACGCTTCAGCTTCCCGATATCCGACGGTAGTGTNNNNNNNNCAAGCAAGTTAGGAGT	15471790	15471827	+	0	42044_0091
2:15485053-15485232/16,27/-	0.924479	2	15485217	15485232	1	CCGGTTTTTGGTCTGT	15485053	15485079	1	CGTAAAAATGGTGCATGCAGAGTCAAA	15485080	15485216	ATTCGATTAAACCAAATCGAACCAACCAAAAGTCAGAACCAACATAATATGTTTAGTTACATGGTATACGAAACTATACTATGACAAACATAAATTATATATATATATATATATATATATATATATATATATATAAA	CGTAAAAATGGTGCATGCAGAGTCAAACTTCAGCTTCCCGATATCCGACGGTAGTGTNNNNNNNNCCGGTTTTTGGTCTGT	15485082	15485121	-	0	42056_0092
2:15508590-15508769/24,19/+	0.983828	2	15508590	15508613	1	TTCTTGGTGGATGCCTTAGCGGCG	15508751	15508769	1	GCGGTCTCATTAGTCCCTC	15508614	15508750	GGGTTTTCTCAAAATGTTATCACTCTTTTATTTGAATCCTTGCCAACATTTTGGATTAGCCTTTGCGAATAATATATATATATATATATATATATATATATATATATATATATATATATATATATATATCATCACTT	GCGGTCTCATTAGTCCCTCCTTCAGCTTCCCGATATCCGACGGTAGTGTNNNNNNNNTTCTTGGTGGATGCCTTAGCGGCG	15508682	15508742	+	0	42071_0093
2:15596521-15596700/16,29/-	0.958387	2	15596685	15596700	2	GTGTTGATAATCCGGG	15596521	15596549	2	GCTAATCATATCGGATTTGGTTTGATTGT	15596550	15596684	CAGACCTTTTTTTCGTTGTGAAACGAAAAGAGATCCAAAGACGTGGACAAACAAAAAAGATGTAAGTTTGAGTTTGAGTTTGAGTTTGAGTTTGAGTTTGAGTTTGAGTTTGTGTTTATGTTATGTAACTTAGCA	GCTAATCATATCGGATTTGGTTTGATTGTCTTCAGCTTCCCGATATCCGACGGTAGTGTNNNNNNNNGTGTTGATAATCCGGG	15596568	15596620	-	0	42136_0263
2:15698138-15698317/19,26/-	0.980726	2	15698299	15698317	1	GATGGGGCAGATGCAGAGT	15698138	15698163	1	GAGAGTTTTGATGCTCCTCCGGTGCC	15698164	15698298	CAAGCACAGATAAGGTCAGAGAGTCAAAACCAGAATACAGCTTCATCATCATCATCATCATCATGGTTTGGAGGGCTTTTTGATAAGAAAAAGGAGGAGGTGCAACCAGGCAGTGAAAGTAAAACAGAGGTGTTG	GAGAGTTTTGATGCTCCTCCGGTGCCCTTCAGCTTCCCGATATCCGACGGTAGTGTNNNNNNNNGATGGGGCAGATGCAGAGT	15698235	15698256	-	0	42180_0264
2:15802676-15802855/17,28/-	0.970349	2	15802839	15802855	1	TAGCGCGTCGTACACTT	15802676	15802703	1	GCGATCTATGCCTGAAGTGGAAGTGGAT	15802704	15802838	GATGCTTAATTTATGTATTTTAAGTTACGCAGTTTCCAGATTTTCAGACCCTCTGAAAGTGGAAAGAGCATTTTTTAAAAGAGTAATAAGAAAAACAATTATCTTTGAACTCTCTCTATCTCTCTCTCTCTCTCT	GCGATCTATGCCTGAAGTGGAAGTGGATCTTCAGCTTCCCGATATCCGACGGTAGTGTNNNNNNNNTAGCGCGTCGTACACTT	15802704	15802729	-	10	42252_0265
2:15816895-15817074/18,27/+	0.975901	2	15816895	15816912	1	GAGAAGAAGATTGAAAGA	15817048	15817074	1	GTGTGAAGAGAGTGGAAAAGTCGTCAC	15816913	15817047	TGAGGTTGAAGAAGAAGAAGAAGAAGATGGTTAAAAGCTTCAAGAACATGGCTACCTCTTTTTTTTCTCTGCTCTGTGTTGTTCTTTCTTTTGCTTTGTTTTTAGTTGTGAAGAGAGAAAGAGAGACGATTTATG	GTGTGAAGAGAGTGGAAAAGTCGTCACCTTCAGCTTCCCGATATCCGACGGTAGTGTNNNNNNNNGAGAAGAAGATTGAAAGA	15816920	15816939	+	10	42257_0266_SNP_a
2:15828806-15828985/16,29/+	0.858227	2	15828806	15828821	1	AAAACCAAAACGAGTG	15828957	15828985	1	GCGGACTGATCTAAATCTTTTATGTTTGC	15828822	15828956	GAGGTTTTTTAACGATCAAAGGAATTATAGTTTATTTAATTAATTAATTGGGAAATAATAATAATAATAATAATTGGACCGTAGGGATTTTATGAAGAAAAAGATGACACGAACTTTGGATTTTAGTAAAAGTTA	GCGGACTGATCTAAATCTTTTATGTTTGCCTTCAGCTTCCCGATATCCGACGGTAGTGTNNNNNNNNAAAACCAAAACGAGTG	15828875	15828895	+	0	42272_0267
2:15889155-15889334/16,29/+	0.961894	2	15889155	15889170	1	GTCTTGGATCTGTTTG	15889306	15889334	1	CGGTTTATTTCGATTTTCCCGGGAGATTT	15889171	15889305	ATCTCGCCATTTCTCCGAAAACACTAATGATCGGAATGTGAAGAAGCGGAGGAGAGGGAGAGAGAAGTTGATTAGAAGAAGAAGAAGAAGAAGGTAAAGGACTAGCGGGAGATTTTAGAAGCTTTGGAATTGGAA	CGGTTTATTTCGATTTTCCCGGGAGATTTCTTCAGCTTCCCGATATCCGACGGTAGTGTNNNNNNNNGTCTTGGATCTGTTTG	15889244	15889263	+	0	42326_0268
2:15906842-15907021/20,25/-	0.975325	2	15907002	15907021	1	CGATTTGATCTGAGTTTGCG	15906842	15906866	1	GCCATGGTTGATTGAAGTGAGCTTG	15906867	15907001	TAGCCCATCATGTTGACATCAGCGGCAGGACCAGTGATGTCATAGCTTCCGACTCCGATTAAGTATGCATAAACCGTTCTTGAAAGAAGAAGAAGAAGAAGAAAGAGTATAAATTGAAACAATGGTAGTGAAACA	GCCATGGTTGATTGAAGTGAGCTTGCTTCAGCTTCCCGATATCCGACGGTAGTGTNNNNNNNNCGATTTGATCTGAGTTTGCG	15906899	15906918	-	0	42339_0269
2:15945047-15945226/16,29/-	0.978577	2	15945211	15945226	1	TCGATAATGGTGGAGC	15945047	15945075	1	GGAGATCAAAAGAGAGCTGCTTTTTCCAG	15945076	15945210	TCAAACAGAGAGAGAGAGAGAGAGAGAGAGAGAGAGAAAAGTGGGAGATATTTGATCTGTCAAAATGGCATTTATTCAAATGGAATCTGAGAGAGAAAGAGAGATAAGCATCTAAAGCTTTGAAGAATCTAAAGA	GGAGATCAAAAGAGAGCTGCTTTTTCCAGCTTCAGCTTCCCGATATCCGACGGTAGTGTNNNNNNNNTCGATAATGGTGGAGC	15945174	15945204	-	0	42356_0270
2:15976288-15976467/16,29/+	0.979936	2	15976288	15976303	1	GAGGAAAATAGGGGAG	15976439	15976467	1	GGGTCAACAAAGCTTTGGATTTTGTCCAT	15976304	15976438	AGGAATAGGTAAGAGTCATAATCAGAAATGAAAAGGAGCTGTACAATAGGGACTCTATGCCTAACATTAATCTAAAGTGAGAGTCTGAGTATGACAAATCACAATCATATCTCTCTCTCTCTCTCTCTATCTCAT	GGGTCAACAAAGCTTTGGATTTTGTCCATCTTCAGCTTCCCGATATCCGACGGTAGTGTNNNNNNNNGAGGAAAATAGGGGAG	15976413	15976436	+	0	42382_0271
2:15980647-15980826/17,28/+	0.944882	2	15980647	15980663	3	GAGCTTTGTGAAATTCG	15980799	15980826	1	ATTTGGGCTTTAAAATAAGCCCAATTGA	15980664	15980798	AAGATCAAAAGTTACGATCTGGGTGATATCTGAAGAAAAAAGCTCCGAAGAGAAGACGAAGAAGAACAAGAACAAGAACAAGAACAAGAACAAGGTCGATTACACACGTGACAAGCATGTGTAGGGTTTAGATAT	ATTTGGGCTTTAAAATAAGCCCAATTGACTTCAGCTTCCCGATATCCGACGGTAGTGTNNNNNNNNGAGCTTTGTGAAATTCG	15980721	15980757	+	0	42385_0272
2:16122727-16122906/16,29/-	0.844742	2	16122891	16122906	1	GTCCATGAAAGTGAGG	16122727	16122755	1	GAAAGATAGATGAAGCATTATTCATGCTA	16122756	16122890	ATTTATCATACTAGTAGTAAGTAGTAACGCTTTAGGCATAAATATGAACATATATACACATATATATATATATATATATATACAGAGAAAACTTATATATAAATGAATTTTCAACATTGTATTTCTCAAGTACGT	GAAAGATAGATGAAGCATTATTCATGCTACTTCAGCTTCCCGATATCCGACGGTAGTGTNNNNNNNNGTCCATGAAAGTGAGG	16122809	16122841	-	0	42508_0094
2:16241996-16242175/16,29/+	0.982811	2	16241996	16242011	2	CAAGAGGACTAAAGGA	16242147	16242175	1	GCAAGTGAACTCGGTGAGGACATGATTGA	16242012	16242146	TACAAACAGAAAGTTCAACCTTTGAGTCTCATTCCTCAACCAAAAGTGTCTTCTTCTTCTTCTTCTTCTTTTTCTTTATCATCCATCTCCAAATCTTTGACTCCTAGTCAAGCTATACGCGAGAAGAAATGTGTT	GCAAGTGAACTCGGTGAGGACATGATTGACTTCAGCTTCCCGATATCCGACGGTAGTGTNNNNNNNNCAAGAGGACTAAAGGA	16242060	16242087	+	0	42583_0273
2:16291791-16291970/17,28/-	0.978692	2	16291954	16291970	1	GAATGATGAAGCATGTG	16291791	16291818	1	GGCCCAAGAGATGCCTAGGAGGCCGACA	16291819	16291953	CATTTTGCTATGCAAATCAGATAATGCAAAAAATGGTTAAGGAAAGAGAGAGAGAGAGAGAGAGAGAGAGAGAGAGAGAGAGAGACCAGAGATGCCGGCAGTGCAGTAGACGAGGATGAATATCATGCCACCAAA	GGCCCAAGAGATGCCTAGGAGGCCGACACTTCAGCTTCCCGATATCCGACGGTAGTGTNNNNNNNNGAATGATGAAGCATGTG	16291869	16291909	-	0	42619_0274
2:16296108-16296287/18,27/-	0.959712	2	16296270	16296287	1	CAACAAAAGGGTTCTTTT	16296108	16296134	1	TTCGATAACTCTCAGCAACACAGCATC	16296135	16296269	TTCTCATTCAGTATCCAACAAGTAAGCATAGAGAATTCATCATCATCATCATCATCAATGCCAACACTTGCATAAAGTAACAACAAGAAGAAGGAAAAAAAACACAAACTTTAAAAGCAAGAGGAAGTGATCTGA	TTCGATAACTCTCAGCAACACAGCATCCTTCAGCTTCCCGATATCCGACGGTAGTGTNNNNNNNNCAACAAAAGGGTTCTTTT	16296213	16296233	-	0	42622_0275
2:16390705-16390884/19,25/+	0.904141	2	16390705	16390723	1	TTTCCGGGGCCGGAGAGTT	16390860	16390884	1	GATGGAAGTTGGTACTTTGCAATCT	16390724	16390859	CATTTTCCGAAGGAGGAGGAGGAGGAGGAGGAGGAGGGGGAGGAGGAAGGATTTCGACGTTTCGTTTAAGGATTCCAAATGTAATCAAAGACAAGTTGTCGTTTGAGGGATTAATGGAATCTTCTTCTTGAATGAA	GATGGAAGTTGGTACTTTGCAATCTCTTCAGCTTCCCGATATCCGACGGTAGTGTNNNNNNNNTTTCCGGGGCCGGAGAGTT	16390734	16390774	+	0	42711_0095
2:16391940-16392119/20,25/-	0.975055	2	16392100	16392119	1	TCTGTGTGTGACCCTTTTTG	16391940	16391964	1	GTCTTACCATATACGGAAAGGCCAG	16391965	16392099	TCCAGCTTGGTTAAATCTTGCATTTAATGATTATTTAGCATCATTCTCATGTGAAAAAAAAAAAGAAGAAGAAGAAGAAGAAATTACTAAGTAAGGAAAGAGAATGATGACGAGAAGAAAACTTTTTAAGATTTG	GTCTTACCATATACGGAAAGGCCAGCTTCAGCTTCCCGATATCCGACGGTAGTGTNNNNNNNNTCTGTGTGTGACCCTTTTTG	16392018	16392037	-	0	42712_0276
2:16432354-16432533/17,28/-	0.980552	2	16432517	16432533	1	AAACTAAACAATAAACA	16432354	16432381	1	GCAGCTAATGATGATGATTCCATGGAGC	16432382	16432516	CTGCTGTCTCTTCTTCTTCTTCTTCTTCTTCTTCTTCTTCTTCTAGAACAGTACGTTATGAGAGTGTTTTAAGGCCGTTAATTTGTTAAATCACTCTTTAAAAGTTTTTCTATTGTATCTATGGCTCGTATTGTA	GCAGCTAATGATGATGATTCCATGGAGCCTTCAGCTTCCCGATATCCGACGGTAGTGTNNNNNNNNAAACTAAACAATAAACA	16432473	16432508	-	0	42729_0277
2:16597512-16597691/16,29/+	0.974604	2	16597512	16597527	1	GGGGAACATATTAAAG	16597663	16597691	1	GCTGTATGGCTTTTCCTGATGAGATTGCT	16597528	16597662	TTGTTGTAAGCATGCCTAGTCTTGTTTCAGATGAAAATGATGATGATGATGATGATGATGAAGGTCCTAGTAATGAATCGAGTATTCCACTAGTTGTGACTGTTACTAAGAAGAGTGGACTCACTCTAGAGTTTA	GCTGTATGGCTTTTCCTGATGAGATTGCTCTTCAGCTTCCCGATATCCGACGGTAGTGTNNNNNNNNGGGGAACATATTAAAG	16597564	16597588	+	0	42819_0279
2:16645057-16645236/17,28/+	0.969931	2	16645057	16645073	1	GTTTGCGTTCTGGTTAG	16645209	16645236	1	GGGAGGGTTTTTAAGGAGTGGAGTGGGG	16645074	16645208	TAATAAGGATTTGAATTATAAGAATAAATTTAGGGGGATATTCAAGTTTGTATTAATAAATATATATATATATATATATATTTATGTATTTTTAGTTACTAAGACCAAGCTCTCTGTAATTTTTTTGTTGACCTT	GGGAGGGTTTTTAAGGAGTGGAGTGGGGCTTCAGCTTCCCGATATCCGACGGTAGTGTNNNNNNNNGTTTGCGTTCTGGTTAG	16645129	16645162	+	0	42850_0280
2:16652573-16652752/18,23/-	0.888432	2	16652735	16652752	1	CTTGGGATTTGGGATTTC	16652573	16652595	1	GTTTTCGGAAATAGCCATGGATG	16652596	16652734	AAACTACCAAGTAAGCATGAAGTACATAGTCTCGAATGAACGTAATTTTAAGTTATACTACCATATATTTGGGGAAATAATTGATATGACATATATATATATATATATATATATATATACATATATTGAAAGAACAAAA	GTTTTCGGAAATAGCCATGGATGCTTCAGCTTCCCGATATCCGACGGTAGTGTNNNNNNNNCTTGGGATTTGGGATTTC	16652609	16652644	-	0	42857_0096
2:16824264-16824443/27,18/-	0.982698	2	16824417	16824443	1	CTCTGATCTCTTATCTCTAATTCTAAT	16824264	16824281	1	GCTGGTTCGGTTCGTGTT	16824282	16824416	CCATAGTAAACTCGATTTCATCATCTTCTGCTCACAACACTTACTGTTGTTGTTGTTGTTGTTATTGTTCTTCTCGATTCACTCGATCGATGTTGTTCAAAATGCGTTCTTTTGTGGCTTTTGTGCTCCTTCTGA	GCTGGTTCGGTTCGTGTTCTTCAGCTTCCCGATATCCGACGGTAGTGTNNNNNNNNCTCTGATCTCTTATCTCTAATTCTAAT	16824348	16824372	-	0	42965_0281
2:16925644-16925823/16,28/-	0.982822	2	16925808	16925823	1	TCCAATACACCACCAA	16925644	16925671	1	GGATTCTTTTTGGACTCTTGAGTCTCAG	16925672	16925807	TAGAAGAAGAAGAAGAAGAAGAAGAAGAAGAAAAAGAAAAACTCTTTGTCATTGTTTAATGTTGGTAAGAATGCGAGACGATAAACCCTAAGGTTATTAGGCAAAAGGTTTTAGCCTAAGAGACCAACCAATTCAA	GGATTCTTTTTGGACTCTTGAGTCTCAGCTTCAGCTTCCCGATATCCGACGGTAGTGTNNNNNNNNTCCAATACACCACCAA	16925770	16925806	-	0	43048_0282
2:16940840-16941019/19,26/-	0.961022	2	16941001	16941019	1	GGACGATTCTAACTCGGAG	16940840	16940865	1	GAGGAGGGCTACGAGAGAGAGAGAGA	16940866	16941000	ATTTTTCTTCGTTTGATTTTTTTGAATTTGGGTTTTAAGAGAGAAGGTTTATAAAGAAATAAATAAAAACAGAATTGAAGAAGAAGAAGAAGAAGAAAGAGCAGAGGGAGATCGGCGGAGCAAGAAGATGGAACA	GAGGAGGGCTACGAGAGAGAGAGAGACTTCAGCTTCCCGATATCCGACGGTAGTGTNNNNNNNNGGACGATTCTAACTCGGAG	16940904	16940924	-	0	43055_0283
2:16956914-16957093/19,26/-	0.968252	2	16957075	16957093	1	GGATAGACGAAAACAAGGG	16956914	16956939	1	CGATTCCGACAGATAGACAGAGGGCG	16956940	16957074	TTAAAAAGATAAAAGATCTCACAAACGACGCTGTTTTGGAGCCTGTTCCGTGTTTTTTTGTGGCCATCATCATCACCTTCGGACACAACGTGATATCTGAATCTCTCCCTCTCTCTCTCTCTCTCTTTCGCTGTC	CGATTCCGACAGATAGACAGAGGGCGCTTCAGCTTCCCGATATCCGACGGTAGTGTNNNNNNNNGGATAGACGAAAACAAGGG	16956949	16956973	-	0	43058_0284
2:17030274-17030453/17,27/+	0.916039	2	17030274	17030290	1	TTACGATGGTCTCTCTT	17030427	17030453	1	CATAGGGGTCGATTGTGTTCTTGCCTT	17030291	17030426	AAATAATAATAATAATTATTATAATAATAATACGTAATGTTGTGTTTGGGCAGTGTAGTAAGTAGTAACATGTATAAAGTACACATTTTCCTCCCTGATTTATTTGATGGGTTGAGAGATATTATTAATTAGTATA	CATAGGGGTCGATTGTGTTCTTGCCTTCTTCAGCTTCCCGATATCCGACGGTAGTGTNNNNNNNNTTACGATGGTCTCTCTT	17030292	17030322	+	0	43108_0285
2:17036542-17036721/17,27/-	0.985861	2	17036705	17036721	2	GTGTTTGTGTGTGGTTG	17036542	17036568	1	GTTTGATTTGTTTGGACCATTATTGGC	17036569	17036704	AAAGAAGAAGAAGAAGAAGAAACACAAGTGTTGCTGCATAGTTTTAGACAGAAAACACATTTTGTGTTTTTTTTTGGCATGATCACTGGTTTGAGGTGGTTGGCATTTTTTCTGATTTGATTTTATTTGTTTGTTT	GTTTGATTTGTTTGGACCATTATTGGCCTTCAGCTTCCCGATATCCGACGGTAGTGTNNNNNNNNGTGTTTGTGTGTGGTTG	17036684	17036703	-	0	43114_0286
2:17044296-17044475/16,27/-	0.982269	2	17044460	17044475	2	GAAGGAAGAGAAAGGA	17044296	17044322	1	GCAAGAGTTGTGCTGAACCAGCCACGG	17044323	17044459	TTCCTTCTTTCATTCCCGTTCTCACGACTGTTACTACTACTACTACTACTACTGCTTCTGTAGTTTCTGGTAGGGGTGGTTCTGTTTTGACTGCTTGAAGGTCCGCTAGCTGATGGTAGCTCTTGGCGACAGACCGG	GCAAGAGTTGTGCTGAACCAGCCACGGCTTCAGCTTCCCGATATCCGACGGTAGTGTNNNNNNNNGAAGGAAGAGAAAGGA	17044407	17044428	-	0	43118_0287
2:17074057-17074236/19,23/+	0.981788	2	17074057	17074075	1	AACCAAAAGAGCAAAGGGG	17074214	17074236	1	GGTTGGGCCACGATGGGCCTTCT	17074076	17074213	TCTCTTATTCTTGTGTGCTTTTGGATTTTGAATACGGAAATCGACGATATTAGGGGTTTCGAATTTGTGCAGTTGGAAGAGCAACGCATTACAGTTTGTTGATAAGAATATATATATATATATATATATATATATTAC	GGTTGGGCCACGATGGGCCTTCTCTTCAGCTTCCCGATATCCGACGGTAGTGTNNNNNNNNAACCAAAAGAGCAAAGGGG	17074183	17074210	+	0	43135_0288
2:17106925-17107104/18,27/-	0.949487	2	17107087	17107104	1	AACAAACCTTAATTAGCA	17106925	17106951	1	GAGGATAGAGATTTTGCGACGAGGAGG	17106952	17107086	AGACAGAGAGAGAGAGAGAGAGAGAGAGAGAGAGAGAGAGAGAGAGAGAGAGAGAGAGAGAGAGAGAGAGAGAGAGAGAGAGAGAGAGAGAGAGAGAGAGAGAGAGAGAGAGAGAGAGGGAAGAGTGGAGCCAAA	GAGGATAGAGATTTTGCGACGAGGAGGCTTCAGCTTCCCGATATCCGACGGTAGTGTNNNNNNNNAACAAACCTTAATTAGCA	17106962	17107086	-	0	43144_0289
2:17108424-17108603/17,28/+	0.973331	2	17108424	17108440	2	GGGATTTGTCGTGATAC	17108576	17108603	1	TCTCAAATCAAACCGAAATTACTTTGAT	17108441	17108575	ACATATCCCAGTAGCCTTCACACTATATAATCAGTCTAAACAAAGAAGAAGAAGAAGAAGAAGAAGAAGAAGAAGAAGAAGAAGAAGAAGAAGAAGAAATGAACAAAATCTCAAATCATTAATTAATGAACAAAA	TCTCAAATCAAACCGAAATTACTTTGATCTTCAGCTTCCCGATATCCGACGGTAGTGTNNNNNNNNGGGATTTGTCGTGATAC	17108483	17108538	+	0	43147_0290
2:17160337-17160516/16,28/-	0.970714	2	17160501	17160516	1	GATGGGTGATGCAGCG	17160337	17160364	1	ACCATGGTTGTGAAAACAGAGGATCATC	17160365	17160500	ATTCAAGAGTGGAAATCTCACGTTGCTACGATAATGAGATGTCTCACAAGTAGTAGTAGTAGTAGTAGAAAGAGTAAACCAAACTGGAGTTCGAGGTTTGTTGCGAATTTGAAACCCTTTGCATGGTTAAGTTCAA	ACCATGGTTGTGAAAACAGAGGATCATCCTTCAGCTTCCCGATATCCGACGGTAGTGTNNNNNNNNGATGGGTGATGCAGCG	17160433	17160452	-	0	43174_0291
2:17160848-17161027/16,26/+	0.983657	2	17160848	17160863	1	AAAGCAAGAAACGAGG	17161002	17161027	1	GTAGTCACGCTTTGTGTATGTGTCTG	17160864	17161001	GAGAGAAAACAGAGTGAGATTAGTGGCTAAAGAGAGAGAGAGAGAGAGAGAGATTGATTGATTTACGGCTCAAGAAAAGAAAATTTGTTTTTGCCTTTTTAGTCATTTACACACGCAATTCAAGAGGAGCTGTCTCAT	GTAGTCACGCTTTGTGTATGTGTCTGCTTCAGCTTCCCGATATCCGACGGTAGTGTNNNNNNNNAAAGCAAGAAACGAGG	17160894	17160916	+	0	43175_0292
2:17472533-17472712/16,29/+	0.904855	2	17472533	17472548	1	GGGTTTAGGAATTGTG	17472684	17472712	1	GGAAAAAATATACACTACATGACAAAAAG	17472549	17472683	ATCGTCTAAAAAGAAGAAGAAGAAGAAGAAGAAGAAGAAGAAGATCATGGTCTGATCAAAGTAGTTTGATCTCTTCTGATATATCGCGAAGCTAATTGGGTCAAAGGATTTTGTTTTGATTTTAATTAGGTTAGA	GGAAAAAATATACACTACATGACAAAAAGCTTCAGCTTCCCGATATCCGACGGTAGTGTNNNNNNNNGGGTTTAGGAATTGTG	17472559	17472592	+	10	43371_0293
2:17479620-17479799/21,19/-	0.984631	2	17479779	17479799	1	TGGAGGATTCGGGGAGGTTAG	17479620	17479638	1	GTTTGGTCTGTTTTTGGGG	17479639	17479778	AGCTGAGATGGGAGAGTAACATTACTTTTTGGTCAAGCGGAAACGAAGTTGTGAAGAAGAAGAAGAAGAAGAAGAATATTGGGGCTGTTCTTACTTCCGAAGGAGCTCTGTTTCTTGAGGATCAAGATCTGATGAGACCT	GTTTGGTCTGTTTTTGGGGCTTCAGCTTCCCGATATCCGACGGTAGTGTNNNNNNNNTGGAGGATTCGGGGAGGTTAG	17479703	17479726	-	0	43377_0294
2:17566133-17566312/19,21/-	0.981628	2	17566294	17566312	1	GGTGACGCTGAGGTTGAAA	17566133	17566153	1	GGTGGGAGTGTCTGGTTCAAC	17566154	17566293	AAACCAATCGAACCGCAGACGTACCAGGAACCGAACCATGTATCAACGCCATTGAAGAAGAAGAAGAAGAAGAAGGTGAAAAACGAAAGATTGAGAATTTGTTTGCTTTGAGCAACCAAACCTCAGGAAAAAAGAGTTAA	GGTGGGAGTGTCTGGTTCAACCTTCAGCTTCCCGATATCCGACGGTAGTGTNNNNNNNNGGTGACGCTGAGGTTGAAA	17566219	17566240	-	0	43453_0295
2:17584602-17584781/17,28/+	0.931993	2	17584602	17584618	1	CAGATCCAAAACCCAAA	17584754	17584781	1	GACGTAGTTGTAAAACTAGTCAGGGGTT	17584619	17584753	TTTGCCACCATTTATATATATATATATATATATACATATAACTAATAATAAGAAATTTAGCAAGTATTTGATAGTATTTGCATCAGCATAAATCAAAATTTTCTCAAAATGTCTGTCTAGCTATTTCAGAACCTA	GACGTAGTTGTAAAACTAGTCAGGGGTTCTTCAGCTTCCCGATATCCGACGGTAGTGTNNNNNNNNCAGATCCAAAACCCAAA	17584631	17584658	+	0	43469_0097
2:17589067-17589246/18,27/+	0.973841	2	17589067	17589084	9	TGCTCTCTCTCTTCTGTC	17589220	17589246	1	GCATCAGTATCTGAACCCGCCTTGGGT	17589085	17589219	AAATCCACATCAACCACATGACAACAACAACAACAACAACAACAACAACAACAACAACAACAATACATGGCGAGCTTCTTCAGGTTTTGGCCCGATGACGGTTACAATGGCTCAACCACCACCTGCACCTAGCCA	GCATCAGTATCTGAACCCGCCTTGGGTCTTCAGCTTCCCGATATCCGACGGTAGTGTNNNNNNNNTGCTCTCTCTCTTCTGTC	17589105	17589147	+	0	43472_0296
2:17636905-17637084/17,28/+	0.981863	2	17636905	17636921	9	GTTTCTTCATCTTCTTC	17637057	17637084	1	GTCAGCTTAGACACCACTTCTTCCAGAC	17636922	17637056	CTCGTTGATTTACTACTTACATCTGCAGCACTCGGTGGTGGTGGTGGTGGTGGAACTTGTTGAGCTTCTTCTTCTGCCTTAATCAATGACTTCCAAATACTCGCAATCTGAGACTCGGTCAGATTCAGATTCTCT	GTCAGCTTAGACACCACTTCTTCCAGACCTTCAGCTTCCCGATATCCGACGGTAGTGTNNNNNNNNGTTTCTTCATCTTCTTC	17636955	17636974	+	0	43494_0297
2:17688497-17688676/16,27/-	0.98025	2	17688661	17688676	1	GATGGACTGGGTGAAG	17688497	17688523	1	GAATCTTGAGGGGATGGAATTTGACTC	17688524	17688660	TCAAAGATTGAAGAAGTTTCCTTGGAGATAAAGAAACGAAATGATGAGGTTAGTGAAGTTCCCTTGGATAATAAGATAGCAGATGATGATGATGATGATTATGATGAATGGGAGCAAGACATCGAGGAACGCCTCAA	GAATCTTGAGGGGATGGAATTTGACTCCTTCAGCTTCCCGATATCCGACGGTAGTGTNNNNNNNNGATGGACTGGGTGAAG	17688554	17688579	-	0	43528_0298
2:17695622-17695801/16,27/-	0.979075	2	17695786	17695801	1	ATACGATCACGGAGAA	17695622	17695648	1	GCTTCTAGAAGTGGAGAGAAGGGGGAA	17695649	17695785	CTCAAGATCCGGTGACGAATCCAACTTCTTGTGACGGAGCTCAAGTCGAGAGAGAGAAGACTGTACTAGTAGTAGTAGCTGTGGATTTTTGTGTCATCATCGGAGATCGGAATCTTCTTCTTCTTCTTCTTCTTGGA	GCTTCTAGAAGTGGAGAGAAGGGGGAACTTCAGCTTCCCGATATCCGACGGTAGTGTNNNNNNNNATACGATCACGGAGAA	17695652	17695673	-	0	43532_0299
2:17701249-17701428/17,28/-	0.980135	2	17701412	17701428	1	CACTGCACACAAAGCGA	17701249	17701276	1	CCTGTTTCCTGATCTGTTTTCCGGATCG	17701277	17701411	AGAGACAAAGAAGAGAGAGAGAGAGAGAGAGAGAGAGAGAGAGAGAGAGAGAGAGAAAGTGGGGGAAAAAAGGCGAAGAATACGCAGATTCCATCCAATTTAGGGTTAGGACTTCCCCTAATTTGGAAACCTAGT	CCTGTTTCCTGATCTGTTTTCCGGATCGCTTCAGCTTCCCGATATCCGACGGTAGTGTNNNNNNNNCACTGCACACAAAGCGA	17701356	17701411	-	0	43538_0300
2:17748320-17748499/16,25/+	0.963888	2	17748320	17748335	1	GGACGGCTGAGAGCGG	17748475	17748499	1	GCCGGAGATGGGAGGTGGGAGAGAG	17748336	17748474	CTTACGAGGAGAACGGTGGACCTCCGGAGACTAACCCTTTCGCTAGCGGAGCGATAAGGGTTTATCTGAGGGAGGTTAGGGAGTGTCAGGCTAAGGCTAGAGGGATTCCTTACAAGAAGAAGAAGAAGAAGAAGCCAAC	GCCGGAGATGGGAGGTGGGAGAGAGCTTCAGCTTCCCGATATCCGACGGTAGTGTNNNNNNNNGGACGGCTGAGAGCGG	17748449	17748469	+	0	43566_0301
2:17782413-17782592/18,27/-	0.875615	2	17782575	17782592	1	TTTTCGGTTCAGATTTCT	17782413	17782439	1	GTCTTGGGATTTGTTGAAATGGAGACG	17782440	17782574	GATCCTTGGGTTTGGCCGCGTACGATACTGGCTCGATTGTAACAGCCTTTTTGCGAGATTCGTTTGAATCGGGAGATGGATTCGAATCGGATGATGAAGATGAAGATGAAGATGAAGATGAAGATGAAGAGAAGA	GTCTTGGGATTTGTTGAAATGGAGACGCTTCAGCTTCCCGATATCCGACGGTAGTGTNNNNNNNNTTTTCGGTTCAGATTTCT	17782440	17782482	-	0	43582_0302
2:17796452-17796631/21,19/-	0.981343	2	17796611	17796631	1	GGTGAAGAAAGATGATGGAGT	17796452	17796470	1	TTCCGGCGCCGGCGGCGGC	17796471	17796610	AACAAAAGAAGAAGAAGAAGAAGAAGAAGAAGACAAAATCGGTGGAAACAGAGCAGCGAGACCGTATTTGTCGGAAGCGTGGGATCATTGTGGAGGAAGAAAAGGAAAAAAACAAATCACGCCGGAGATTAAGTGGAGAG	TTCCGGCGCCGGCGGCGGCCTTCAGCTTCCCGATATCCGACGGTAGTGTNNNNNNNNGGTGAAGAAAGATGATGGAGT	17796578	17796605	-	0	43587_0303
2:17822428-17822607/18,27/+	0.972169	2	17822428	17822445	1	GGGTCTTCTCGAACTTTG	17822581	17822607	1	GTCGGTTGAATTTAAGGTTTTGGGCGG	17822446	17822580	ATTATACATATATATATATATATATAACTTTGTGAGATGTCACTGTTAATAGATAATAGGCAATAACAATAATATCCCAAAAAAAGAAGGGCAAACAAATCATATACTATATGGTACTGGTCCATTCACTATTTT	GTCGGTTGAATTTAAGGTTTTGGGCGGCTTCAGCTTCCCGATATCCGACGGTAGTGTNNNNNNNNGGGTCTTCTCGAACTTTG	17822448	17822471	+	10	43602_0304_SNP_a
2:17837001-17837180/18,26/+	0.922281	2	17837001	17837018	2	TCTTTTCCTTGACCTCAT	17837155	17837180	1	CGTGGCGTCGGGAGTGGCTAGAGTTT	17837019	17837154	CTTCTTCTTCTTCTGCTTCTTCTCGGTCTTCACGTACGCTTGCGTTAGTCTCTGACAATCTCCGTTTGGTTCTGCGCTCGAAACCAGCGGCGCGTGATTTCACGGTGGCTGAGCATGACGGTGACAGAGAGCGTCT	CGTGGCGTCGGGAGTGGCTAGAGTTTCTTCAGCTTCCCGATATCCGACGGTAGTGTNNNNNNNNTCTTTTCCTTGACCTCAT	17837018	17837041	+	0	43618_0305
2:17914699-17914878/16,27/+	0.980197	2	17914699	17914714	1	CGCTACCGAAAAACCA	17914852	17914878	1	CTTTCTGGGATATATCGGACGGTCGAT	17914715	17914851	AGCAGGAGAAGAATAAGTACTAAGGCTGAATATCGGTGATTCGGCGGATCAAACGACGACATGACGCAATCGACTGAGCAAATCGGAGAGAAGAAGAAGAAGAAGAAGAAGAAGAGACAAAGAGTTGCTGTTAAAAT	CTTTCTGGGATATATCGGACGGTCGATCTTCAGCTTCCCGATATCCGACGGTAGTGTNNNNNNNNCGCTACCGAAAAACCA	17914803	17914829	+	0	43670_0306
2:18145562-18145741/17,25/-	0.977148	2	18145725	18145741	1	GCAGAAGGGTATTGTAG	18145562	18145586	1	GTGAAGAAGCGTTTGGTCTGGTCGA	18145587	18145724	TCATTTGCAACGTTTTTCCCCCAATCACACACAACTAGTTTTAGGGCTCGTTGTTGTTGTGGCATTCAAAATCTGACATTGAAGAGAAAAGAGAGAGAGAGAGAGAGAGAGAGAGAGAGAGAGAGAGAGAGAGAGAGA	GTGAAGAAGCGTTTGGTCTGGTCGACTTCAGCTTCCCGATATCCGACGGTAGTGTNNNNNNNNGCAGAAGGGTATTGTAG	18145586	18145642	-	10	43791_0307_SNP_a
2:18199954-18200133/16,29/-	0.981881	2	18200118	18200133	1	ACCAAATACACATCCG	18199954	18199982	1	TCGTCTCTACCTCTGAGGCTACTTCTTCC	18199983	18200117	ACGGGGAAAAAGAGTTCCGACAAGAATCGAGAACTGAAAGATTTGTCATTTGTCTCTCAAATATCTGTGGAGAGAAGAGAAATTGGAATAAAGAAGACAGTGTTGTGAGAGAGAGAGAGAGAGAGAGAGATGAGT	TCGTCTCTACCTCTGAGGCTACTTCTTCCCTTCAGCTTCCCGATATCCGACGGTAGTGTNNNNNNNNACCAAATACACATCCG	18199984	18200011	-	0	43826_0308
2:18205575-18205754/16,28/+	0.983224	2	18205575	18205590	1	GAGAATCCTCTGGTCC	18205727	18205754	1	GTGGTTTTGGTTATGGCTGTGGTTGTTG	18205591	18205726	CATCAGGCATTCGTGGTCCAGGTGGTTGCTGTTTCCCCATGCCTGGTTGCTCCATGTTGTTCATTGGATTGTTCGAAGGTTGTGTTCCCACTTGATGATGATGATGATGATGATGATTTCCTCGCCCATTGTGGTT	GTGGTTTTGGTTATGGCTGTGGTTGTTGCTTCAGCTTCCCGATATCCGACGGTAGTGTNNNNNNNNGAGAATCCTCTGGTCC	18205683	18205707	+	0	43830_0309
2:18314737-18314916/16,29/+	0.931166	2	18314737	18314752	1	ACAAGTCGAAGGTTTC	18314888	18314916	1	CTGCAAATCGCATTTGGTGAGATGAGATC	18314753	18314887	ATCTTCAACAACAACAACAACAACAACAACAACAACAACAACAACAACAACAACAACACCAACTTCGATACAAAGGCTCATAATTCGTCTTAATTAATAACAGATTAATTTCTAGGGTTTTCAATCTTATTGATT	CTGCAAATCGCATTTGGTGAGATGAGATCCTTCAGCTTCCCGATATCCGACGGTAGTGTNNNNNNNNACAAGTCGAAGGTTTC	18314758	18314815	+	0	43880_0310
2:18329647-18329826/17,27/+	0.945465	2	18329647	18329663	2	AATGGAGGAGACAATGG	18329800	18329826	1	GCTTTTGATGTTGATAGTTTTGTTGAC	18329664	18329799	TGGACAACAACAACAACAACAACATCATCATCATCATCATCCGCCTTTTGGACCTTTGAGGTTATTGCCACCATATGCTACTTTCCCAGGTCTTCTAGTTGATACCTCAGACATACCAGCACCCTTTGATGATGAT	GCTTTTGATGTTGATAGTTTTGTTGACCTTCAGCTTCCCGATATCCGACGGTAGTGTNNNNNNNNAATGGAGGAGACAATGG	18329667	18329687	+	10	43894_0311_SNP_a
2:18333859-18334038/23,22/+	0.977447	2	18333859	18333881	1	TCCTCGCTTCCGCTAATGATTGT	18334017	18334038	1	CTTCGTGTAGCTGAGCTCCGTC	18333882	18334016	AGGCACAAGTATCGAGATCTCAAGCGTCGATTTCACGAACAAGAAAAAACAGATGTGACGGCGACGGTGGAAGAAGAAGAAGAAGAAGAAGAGAGAGTTGGTAATAATATCCCGTGGCTTGAACAGCTACGTAAC	CTTCGTGTAGCTGAGCTCCGTCCTTCAGCTTCCCGATATCCGACGGTAGTGTNNNNNNNNTCCTCGCTTCCGCTAATGATTGT	18333951	18333977	+	0	43898_0312
2:18338558-18338737/16,28/-	0.962522	2	18338722	18338737	2	GAATGTAATGTGTGGT	18338558	18338585	1	GCGTGGCTGGTAATGGAAGACCTTTGAA	18338586	18338721	AATGATTGATTCACAAAGGTTTGATTATTGAGAATGCAACATTGATTGATTTTACCGGTGGTGTATTCAGGAACTGATGATGATCTGCCACCGTCGCATAGAGTTCCACGAGGAGGAGGAGGAGGAAGAGGAGGAC	GCGTGGCTGGTAATGGAAGACCTTTGAACTTCAGCTTCCCGATATCCGACGGTAGTGTNNNNNNNNGAATGTAATGTGTGGT	18338587	18338612	-	0	43900_0313
2:18452460-18452639/16,29/-	0.976638	2	18452624	18452639	3	ATCAACCCACCAAATC	18452460	18452488	1	GCAGATGGAGTTCCAATGGGTATAAGTCC	18452489	18452623	TCATCTCAGTGTTGCCTGTAAGACGATTATAAAAAAAAACCAGAATAATTAGATCGATCTGATAATGATGATGATGATGATGATGGAAGATGTTACTTACTGAGATCCCATTTAAGCCCTGAGGTAGTGGTATTG	GCAGATGGAGTTCCAATGGGTATAAGTCCCTTCAGCTTCCCGATATCCGACGGTAGTGTNNNNNNNNATCAACCCACCAAATC	18452539	18452564	-	0	43954_0314
2:18490087-18490266/16,28/-	0.980474	2	18490251	18490266	1	CGGGACCATATTTAGA	18490087	18490114	1	GGTTTGTGTTTGTCTCTATGTGTGTGTC	18490115	18490250	AATCTTGTCGGCAAATATATATATATATATAAACACAACAACAACAACAACAACAGTAACACGTGATTTGGGAATAAGCCACAGGACTAATTCTTACTTATGGTTTTCAAGACAAAGAATAAGAACACGAGTGTGT	GGTTTGTGTTTGTCTCTATGTGTGTGTCCTTCAGCTTCCCGATATCCGACGGTAGTGTNNNNNNNNCGGGACCATATTTAGA	18490196	18490219	-	0	43969_0315
2:18494532-18494711/16,29/-	0.972057	2	18494696	18494711	2	TGTAAACTTTGTCAAG	18494532	18494560	1	GATTCGTTTAGTCGTTAACGACGAGTCTA	18494561	18494695	ATTCATCAAAGTGAACAACAACAACAACAAAAAAGAGAGAGAGAGAGAGAGAGAGAAGAGCAAATATAAGTTATTGAAAACACTTGAAACGCGCAATACAACAGTGGAAGTCAAGAAAGCTATGGAAAATTACAA	GATTCGTTTAGTCGTTAACGACGAGTCTACTTCAGCTTCCCGATATCCGACGGTAGTGTNNNNNNNNTGTAAACTTTGTCAAG	18494636	18494662	-	0	43970_0316
2:18583500-18583679/19,26/+	0.960594	2	18583500	18583518	1	AAAGAAAGAACAATCCGGC	18583654	18583679	1	CTATGTAACGCTTGTGGAGTCCGGTT	18583519	18583653	GGAGGAGGAGGAGGAGGAGGAAGACATCAGTCATCGTCATCGGAGACTACGGAAGGAGGAGGAATGAGGAGATGTACTCACTGTGCATCGGAGAAAACGCCACAGTGGAGGACAGGACCACTTGGACCTAAAACA	CTATGTAACGCTTGTGGAGTCCGGTTCTTCAGCTTCCCGATATCCGACGGTAGTGTNNNNNNNNAAAGAAAGAACAATCCGGC	18583519	18583539	+	0	44023_0317
2:18599682-18599861/18,22/+	0.981118	2	18599682	18599699	1	CGGAGTTACTTGGTACGG	18599840	18599861	1	GTAGGAGGAGCTTGTGGGTACG	18599700	18599839	TGAACCATTCGGCGCCGGTAGCACCGGTACGTAATAATATTACATATTTCTAACAATATATATACATAAATTCTTAGAATAGTAAATTCATTTATATGATGCTTAAATGTGTGTATATATATATATATATATATGTGTGT	GTAGGAGGAGCTTGTGGGTACGCTTCAGCTTCCCGATATCCGACGGTAGTGTNNNNNNNNCGGAGTTACTTGGTACGG	18599813	18599833	+	0	44039_0318
2:18600526-18600705/16,29/-	0.804275	2	18600690	18600705	1	CAATATCCAACACAAT	18600526	18600554	1	CCGTTTGTAGTTGACACGTATAACACCAG	18600555	18600689	TTTTCTCAAATACATGGAAACATAACCTCATGGTTTCTCTTCAATTTCTATATTAAGTAAATAAATAACTTAATTAAGAAAAAAAACTCAAAACCGGGAATTTTTAAAGTATATATATATATATATATATAGTTA	CCGTTTGTAGTTGACACGTATAACACCAGCTTCAGCTTCCCGATATCCGACGGTAGTGTNNNNNNNNCAATATCCAACACAAT	18600559	18600580	-	0	44040_0319
2:18619987-18620166/21,19/-	0.982568	2	18620146	18620166	1	GAGACATAACCTCTCTCTCTC	18619987	18620005	1	GGGGAGGGGGTGTTTGGTT	18620006	18620145	TTCTTTTGTTGTCTTTCTGTTCTGTTCTTGAGATCTCTCTCTCTCTCTCTCTCTAGGGTTATTTTTTTCTGGGTTTTTTGTTTTTACAGTTACTCTGTGTTGTTGAGGAGGCGATGCCCTTATCCTTTGAAAGGTTTCAA	GGGGAGGGGGTGTTTGGTTCTTCAGCTTCCCGATATCCGACGGTAGTGTNNNNNNNNGAGACATAACCTCTCTCTCTC	18620092	18620112	-	0	44046_0320
2:18623717-18623896/16,29/+	0.944041	2	18623717	18623732	1	TTGTCGGTTCTAGCCC	18623868	18623896	1	CACGTGAGAACTACGAATGGGAATTTCGC	18623733	18623867	ATTAAAGTTCAGCAACCCTTATTATTCATTTTTTAGTCTTTCTATTTCTAATTATTCAATTTTATCCAAATAATGAATGAATAAAGTTAAACACCGACACTGTTATATATATATATATATATAACAATACACCGC	CACGTGAGAACTACGAATGGGAATTTCGCCTTCAGCTTCCCGATATCCGACGGTAGTGTNNNNNNNNTTGTCGGTTCTAGCCC	18623836	18623855	+	0	44048_0321
2:18682241-18682420/16,28/-	0.980624	2	18682405	18682420	1	AGAACATGGGGATTGA	18682241	18682268	1	GTCGAGTCTTGAAATTTGATTGGTGAGA	18682269	18682404	AGATTTTAGAGATCCAAATCATAGGGAAAATATGAAGAAGAAGAAGAAGAAGAAGAAGAAGAAGAAGAAGAAGAAGAAGAAGAAGAGAGTCAAAAAAATTACTGTAAAAATTTGTTGACTCTTCTAAAGATTTGTT	GTCGAGTCTTGAAATTTGATTGGTGAGACTTCAGCTTCCCGATATCCGACGGTAGTGTNNNNNNNNAGAACATGGGGATTGA	18682319	18682371	-	0	44076_0323
2:18706088-18706267/20,20/-	0.980006	2	18706248	18706267	1	CACCAGAAGAGAGAGAAAGA	18706088	18706107	1	GGGAGGTTCTGGTTTCGTTG	18706108	18706247	GACAGAGAGAAAATGGTGAGAGAAGAACAAGAAGAAGATGACAACAACAACAACAACAACGGAGGAGGAGAGAGAAAGCTGCTTGTGGCTGATGAAACGGTGCCGTCTTTGTTGGACGAAACGGGGTTGGTTTGTGTAAC	GGGAGGTTCTGGTTTCGTTGCTTCAGCTTCCCGATATCCGACGGTAGTGTNNNNNNNNCACCAGAAGAGAGAGAAAGA	18706188	18706207	-	0	44082_0324
2:18756572-18756751/17,28/+	0.967356	2	18756572	18756588	1	GTGGAAATCGGAGAGGG	18756724	18756751	1	GTTGTCTGCAATGGAGATTCTAGTCGGG	18756589	18756723	GAATACAGATTTGAGATGCAAAGTAGCTCCAGCTCCGGTGGTGACGACCTTGAAAAGCAGCAGCAGCAGCAGCAGAAGGACAAGTCTCCCCAGAAGCAGAGCGAGTCAGCCAATGAATCGAACCACCTCACAATC	GTTGTCTGCAATGGAGATTCTAGTCGGGCTTCAGCTTCCCGATATCCGACGGTAGTGTNNNNNNNNGTGGAAATCGGAGAGGG	18756644	18756663	+	0	44117_0325
2:18779458-18779637/19,25/-	0.983376	2	18779619	18779637	1	TAGAGAGAGAGAGAGTGAC	18779458	18779482	1	TGAGGAGGTGGCTTTTGCGTTTCCG	18779483	18779618	AGAATAAAAAATATCGATTAGGTTAGAGACGAACTACATGTTGCCGGAATTTCAGGCCTCGGAGTCATGATGTTGGAGCTTCTCTCCGATAAGGACCAGCAATCAATTGGCGATAGAGAGAGAGAGAGAGAGAGAT	TGAGGAGGTGGCTTTTGCGTTTCCGCTTCAGCTTCCCGATATCCGACGGTAGTGTNNNNNNNNTAGAGAGAGAGAGAGTGAC	18779484	18779504	-	10	44124_0326
2:18785118-18785297/17,28/-	0.966859	2	18785281	18785297	1	CCAAAAATAAAATGGAG	18785118	18785145	1	TATAGCCAACACTTGTCGGGACCCGTGA	18785146	18785280	ATTGGAGAAGAAGAAGAAGAAGAAGAAGCGACGACTACTACTCAAATTGCTCATGTGACTTCCACTACTTAACCTCCTTTAGAAAACTACAAAAAATAGTTATCATTAAATAATACTGTTTGCTAGCCGGAACGT	TATAGCCAACACTTGTCGGGACCCGTGACTTCAGCTTCCCGATATCCGACGGTAGTGTNNNNNNNNCCAAAAATAAAATGGAG	18785253	18785275	-	0	44128_0327
2:18793577-18793756/16,27/+	0.977965	2	18793577	18793592	1	ATGAACAGAGGGGAGG	18793730	18793756	1	GAGGGATGGGTAGGAATCATGATCAAG	18793593	18793729	TCACAGCGGAAGAGGAAACTGGGGTCATATTGGGAATAACGGCAGGGGTTTAAAGTCTACTCCTCCTCCTCCTCCTCCTGGATTTTCGAGTAACCAAAGAGGATGGGATATGAGTTTAGGAAGTAAGGATGACGATA	GAGGGATGGGTAGGAATCATGATCAAGCTTCAGCTTCCCGATATCCGACGGTAGTGTNNNNNNNNATGAACAGAGGGGAGG	18793652	18793671	+	0	44135_0328
2:18878655-18878834/20,25/-	0.980157	2	18878815	18878834	1	TGTCGAATTTGAGCGGTTTG	18878655	18878679	1	GTTTAGAGTTTTGTTTTGTCCCTGG	18878680	18878814	TCAAGAAGTTGCATGGTAATTCTATCGGAATCTTTGTTTTCTCTGTTTGAAGAAGTCTCTGAAGTTTCTGATCTTTCTTCTTTGGTCGTTACAGGGGAAGCTGTAATGAATCATCATCATCATCATCATCAACAG	GTTTAGAGTTTTGTTTTGTCCCTGGCTTCAGCTTCCCGATATCCGACGGTAGTGTNNNNNNNNTGTCGAATTTGAGCGGTTTG	18878684	18878705	-	0	44199_0329
2:18898377-18898556/19,26/-	0.910223	2	18898538	18898556	1	GGAAGAACAAAATAGTGGC	18898377	18898402	1	GATATGGAGGACTTACACTATGCTTG	18898403	18898537	AGTTCTTCTCACACAAACCGAATAAGCATATAACTTTTTTTTTCATACAGAACATATATATATATATATATATATATATATATATATACATATCCACATACAAATCTCACCAGCTTCTTCTTTTCATATATGACT	GATATGGAGGACTTACACTATGCTTGCTTCAGCTTCCCGATATCCGACGGTAGTGTNNNNNNNNGGAAGAACAAAATAGTGGC	18898445	18898484	-	0	44208_0330
2:18922979-18923158/16,28/-	0.981062	2	18923143	18923158	1	GAGGCAAAGGAAAAAA	18922979	18923006	1	GGGGGATGCAACGGTATAAACTCAGATC	18923007	18923142	CCTCAAATAGCAACAGAGAGAGAGAGAGAGAGAGAGAGAGAGAGACACTGAGTCGGTTGAAGCGCACACACCTTTCTATTTCTCTCTCTTCTTAGATTTGCATCGAATTTGGGGGAAATCGGAAAACGAAAGTCGC	GGGGGATGCAACGGTATAAACTCAGATCCTTCAGCTTCCCGATATCCGACGGTAGTGTNNNNNNNNGAGGCAAAGGAAAAAA	18923098	18923128	-	0	44218_0331
2:18923389-18923568/18,26/+	0.982703	2	18923389	18923406	15	CTTCTCCTTCTTCTTCCT	18923543	18923568	1	GTGGCTAATGTTTGTCTGTTAAACTT	18923407	18923542	CTTCATCTGTGCAGCAGCAGCAACAGCAACAGCAACAGCAGCAACAGCAACAGCAGCTGGCGTCTAGGCAGGTAAAGGATTCTCAAGTCTCTGTTTGGTTCGTTATGACTTAGGAGGGATAAAATGCTTGTTTGTA	GTGGCTAATGTTTGTCTGTTAAACTTCTTCAGCTTCCCGATATCCGACGGTAGTGTNNNNNNNNCTTCTCCTTCTTCTTCCT	18923417	18923463	+	0	44219_0332
2:18923876-18924055/19,26/-	0.975159	2	18924037	18924055	1	GCTTGCTGCTGTGCTTTTT	18923876	18923901	1	GCTGAGGCATTTGCATAGAGCCCGGA	18923902	18924036	GATGCTGAGCCTGCATAGCAAACTGAATATACGCTTGCTGCATTGGATTAAAATTTTGCTGGCCCTCTTGGGTAGAAGAACCCTGTTGTTGTTGTTGTTGTTGTTGCTGAGGAGACTCAAAAAAATTTCTAGACT	GCTGAGGCATTTGCATAGAGCCCGGACTTCAGCTTCCCGATATCCGACGGTAGTGTNNNNNNNNGCTTGCTGCTGTGCTTTTT	18923931	18923953	-	0	44222_0333
2:18933224-18933403/21,24/+	0.980914	2	18933224	18933244	1	TCCACCTTGTAATCACTCATC	18933380	18933403	1	TTTCATCATATCCATCTCTCGACG	18933245	18933379	ATCCTATTTAATCCAAATTCATCATTAAGAAGAAGAAGAAGAAGAAGAAATTTCATCAACAGATCAAAAAAGAAGAAAAACCCCAGAGAATAAATCTAGAGATATAATTCAATCAATTGGAAAATGAACCCACAG	TTTCATCATATCCATCTCTCGACGCTTCAGCTTCCCGATATCCGACGGTAGTGTNNNNNNNNTCCACCTTGTAATCACTCATC	18933271	18933293	+	0	44224_0334
2:18933391-18933570/17,28/-	0.979372	2	18933554	18933570	1	AATGAAAGTAAGGCAAA	18933391	18933418	1	GCGTCGCCGAGCAAACGTCGAGAGATGG	18933419	18933553	TGTCCATTTCATTGATCTTTTCTTATAATATCATATTTTTTCTTTCATTTTGGAATCTTTCTCTCTCTCTCTCTCTAAAACCAGATTCTTAATAGAAGAAGAAGAAGAAGAAGAGGAAAGGAGAAATCTGCCATG	GCGTCGCCGAGCAAACGTCGAGAGATGGCTTCAGCTTCCCGATATCCGACGGTAGTGTNNNNNNNNAATGAAAGTAAGGCAAA	18933436	18933460	-	0	44225_0335
2:18970942-18971121/17,28/+	0.982376	2	18970942	18970958	4	GAAGCTTGTTGATCTCT	18971094	18971121	1	GCCATTGGAGACCTCGAATACCTAAAGC	18970959	18971093	GCTTTATATCTCTCAATCTACAAAATTTGAGCATAAATAATTATCCAGTGAATCCAGTAACTGGAAGAAGAAGAAGAAGAAGAAGAAGAAGAAGAGAAATAGACCTCAGGATTAACAGGCGATTCGAAACCATTG	GCCATTGGAGACCTCGAATACCTAAAGCCTTCAGCTTCCCGATATCCGACGGTAGTGTNNNNNNNNGAAGCTTGTTGATCTCT	18971022	18971056	+	0	44238_0336
2:18972590-18972769/16,29/-	0.871264	2	18972754	18972769	1	ATACCACGTACTTTCG	18972590	18972618	1	CAAGATTAATTATAACATTTCTGCTGTGC	18972619	18972753	CGTGCCTGTCGTCATGTACTTGTACAAGGCAAATTTTGGGCTATAATCAAATATCATACGCAAATAACTGTGTCTGTAATCCACGTTTCTGCAAAAGGCCATGAAAGAAAGAAAGAAAGAAAGAAAGAAAGAAAA	CAAGATTAATTATAACATTTCTGCTGTGCCTTCAGCTTCCCGATATCCGACGGTAGTGTNNNNNNNNATACCACGTACTTTCG	18972620	18972651	-	0	44240_0337
2:18979762-18979941/17,27/+	0.976662	2	18979762	18979778	1	GGTTTCGGCGATTGACG	18979915	18979941	1	TATGGGTCACGCCGTTCGTAGTATCAG	18979779	18979914	CCAGAGATTTGCCTGGTGTTAAGAATCCGAAATCGAGATTGTACTGGCAATTCTCAGCTCCGGTGAAAGAAGACTACAAGATTAGCAGAGAGGAGGAAGAAGAAGAAGAAGAAGATAAGCAGAGTTACTACGTGAA	TATGGGTCACGCCGTTCGTAGTATCAGCTTCAGCTTCCCGATATCCGACGGTAGTGTNNNNNNNNGGTTTCGGCGATTGACG	18979874	18979893	+	0	44242_0338
2:19026865-19027044/17,27/+	0.982172	2	19026865	19026881	1	CTACAGCCTCCATACCT	19027018	19027044	1	TCACTAATCCCGAAACGTATCATTAGC	19026882	19027017	TAAATCATATACAATACAAAAACAAATCAGAATCAAACCAACAAAATGAAGAAGAAGAAGAAGAAGAAGAAGAAAGAAGCCCTACCTAGTAAATTCATGCATGTAGAGATTCTAAAACTAGTTAAACATACAATAA	TCACTAATCCCGAAACGTATCATTAGCCTTCAGCTTCCCGATATCCGACGGTAGTGTNNNNNNNNCTACAGCCTCCATACCT	19026929	19026960	+	0	44267_0339
2:19027182-19027361/17,28/+	0.963633	2	19027182	19027198	1	AGAGAGATCACAATCAG	19027334	19027361	1	CTCTTTTGTATTCTGTGTATAGTCGAAG	19027199	19027333	ATCATACACCGAAGCGGTGTGGAGAAGAAACCTCTTGAAGAAAGCAAATTCAAAAACACACAGAAGAAGAAGAAGAAGAAGAAGAAAGGTGAGGCTATAAATTTGTCATATACTATTGATAATTACATATAATAT	CTCTTTTGTATTCTGTGTATAGTCGAAGCTTCAGCTTCCCGATATCCGACGGTAGTGTNNNNNNNNAGAGAGATCACAATCAG	19027260	19027284	+	0	44268_0340
2:19100411-19100590/16,28/+	0.982684	2	19100411	19100426	1	GTTGAGAAGTGGAGTG	19100563	19100590	1	GGAGGTGATTGTTGGTGCTAATCATATG	19100427	19100562	TACTGTCGATACAAAATTGTGAAAGAGAGAGAGAGAGAGAGAGAGAGAGAGAGAGAGAGAGAGAGAGAGAGAGAGAGAGAGAGAGAGAGAGAGAGAGAGAGAGAGAGAGAGAGAAGAAATGGGGAACAAGAGGTTA	GGAGGTGATTGTTGGTGCTAATCATATGCTTCAGCTTCCCGATATCCGACGGTAGTGTNNNNNNNNGTTGAGAAGTGGAGTG	19100450	19100543	+	0	44309_0341
2:19134723-19134902/19,26/+	0.980959	2	19134723	19134741	1	GTTTTGTTTCCATTTGGGG	19134877	19134902	1	GTACTACAGGAGGAGGATCTTCATGG	19134742	19134876	ATCAAATGAAGGAGCTTTCATCAAGCATAACACAAGAAGTTGATCATGATGATAATCAACAACAGAAGAGTCATGGAAATAATAATAATAATAATAACTCAAGCCCTAATAATGGATATTGGAGTGGGATGTTCA	GTACTACAGGAGGAGGATCTTCATGGCTTCAGCTTCCCGATATCCGACGGTAGTGTNNNNNNNNGTTTTGTTTCCATTTGGGG	19134819	19134838	+	0	44327_0342
2:19245678-19245857/16,29/-	0.967595	2	19245842	19245857	2	TCAATGAAAGAAACAA	19245678	19245706	1	GCTACGGAAATGGAGAAATCTCAGCCACT	19245707	19245841	AATCAGCTTGGATTCGATAAAGATTCCATTTTTAATTCCAGATTTCGTTGGATAAGAAAACAGTAAGAAATCGAGAAGAAGAAGAAGAAGAAGTGATTTGCTTTTGATCAATGAAACAAAGAAAAGAGACCAGAA	GCTACGGAAATGGAGAAATCTCAGCCACTCTTCAGCTTCCCGATATCCGACGGTAGTGTNNNNNNNNTCAATGAAAGAAACAA	19245749	19245768	-	0	44414_0343
2:19330860-19331039/17,28/-	0.981101	2	19331023	19331039	1	GTTCCGAGGGGCGAGGG	19330860	19330887	1	CGGTGCATACGTGAAGACAAAGTATATA	19330888	19331022	ATACGAAAATGTAAATATAATGTTTCTCGTTAATTAATCAAACTGCTATATATATATATATATATATATATATATATATAGCTACGTTTATATACATAGCATGTTGCAATAAATCAAATACGTACGGGATTGTTG	CGGTGCATACGTGAAGACAAAGTATATACTTCAGCTTCCCGATATCCGACGGTAGTGTNNNNNNNNGTTCCGAGGGGCGAGGG	19330943	19330976	-	0	44468_0100
2:19340660-19340839/20,25/+	0.966038	2	19340660	19340679	1	GAGACATGTTGGAGAAGAAG	19340815	19340839	1	GGAGTTGTTCTTGTACTAGCCTTCT	19340680	19340814	ATTGTTGTTATTATTGTTGTTGTTGTTGTTGTGTAAAAGCCTCTCCTATCTCTCTCGAACCTAAGGATTCTCTCTCTGATTAGTATATTTTTTGTTTGACAGAATAATTTGTTACTTATATTGTAATTTAACAAT	GGAGTTGTTCTTGTACTAGCCTTCTCTTCAGCTTCCCGATATCCGACGGTAGTGTNNNNNNNNGAGACATGTTGGAGAAGAAG	19340681	19340711	+	0	44476_0344
2:19353326-19353505/19,26/+	0.94535	2	19353326	19353344	1	GGCCTGCGTGCTGTGCTGG	19353480	19353505	1	GAGACTGAAAGAGAGAAATTAAGCAA	19353345	19353479	ACCGTTTGGTCTTGTAACGTTTTTCGGATTATTGGAATTTTATGAATGAAAAATAATAATAATAATAATAATTTATATATTAAAAAAAAAACAACAACTTGTAAACGAATTAATAAAAATGTTAAATGTGTGTGA	GAGACTGAAAGAGAGAAATTAAGCAACTTCAGCTTCCCGATATCCGACGGTAGTGTNNNNNNNNGGCCTGCGTGCTGTGCTGG	19353396	19353416	+	0	44488_0345
2:19462554-19462733/17,28/+	0.963318	2	19462554	19462570	1	CAAACAACAATGGTGCG	19462706	19462733	1	CTCTGTAAAACCAGTGTCGTTGTTGGTG	19462571	19462705	ATCTGAAGAACAATAATAACAACAACAACAACAACATAAAATTATAGTTAATGTTATATAACTCAAACTAATCCTAAGATAATAACTAAGAATAATTGAATTTATGTAATTAGTTTTAACAACCTGTGTTTGAAT	CTCTGTAAAACCAGTGTCGTTGTTGGTGCTTCAGCTTCCCGATATCCGACGGTAGTGTNNNNNNNNCAAACAACAATGGTGCG	19462579	19462606	+	10	44546_0346_SNP_a
2:19472729-19472908/16,26/-	0.983106	2	19472893	19472908	1	GGTAAGGATTCAGGGG	19472729	19472754	1	AGAGAGTTAACGGGACTCACTGGATT	19472755	19472892	AGAAAGCAGAAGAAGAAGAAGAAGAAGATTTGGGAGGAGAAAGTTTGATGCGAGACAGAGACTGATGGATTACTAGAGCACAAGTATCCATGGCCAAGAAGACCTTTTGCATAATAGAAGACAAGACTAGAGAAGAGA	AGAGAGTTAACGGGACTCACTGGATTCTTCAGCTTCCCGATATCCGACGGTAGTGTNNNNNNNNGGTAAGGATTCAGGGG	19472865	19472889	-	0	44556_0347
2:19521839-19522018/16,29/+	0.976952	2	19521839	19521854	15	TCTTCTTCACTCTCTT	19521990	19522018	1	CTTTCTCTGACCTTGTTCCCATCCTCGAC	19521855	19521989	CTCTCTACACACACACACACACACACACACAAAATGGATTCTTCGAATGTTGAAGAAAACCTAAACCCAGAAACAAAATCCGCAGAAGAACAAAACCCACTTGCCATTTTCCATTCTTCTCTACCAATCGCATCT	CTTTCTCTGACCTTGTTCCCATCCTCGACCTTCAGCTTCCCGATATCCGACGGTAGTGTNNNNNNNNTCTTCTTCACTCTCTT	19521861	19521885	+	0	44583_0348
2:19542878-19543057/16,29/+	0.963795	2	19542878	19542893	1	TGTTGTGTGCTTGACA	19543029	19543057	1	AGCGACACTGATTCATATATTGCCACGTG	19542894	19543028	TTATGTGAACACAACTTAATTTACTAAACCCAAATTAGAATGAAAATTGAAAAAAAAAATGACGAAGATGAAAACGATAGAGGAGGAGGAGGAGGAGGAGGAGGCTCGCACGTCGGAGAAGGGACTTGGTCGTGA	AGCGACACTGATTCATATATTGCCACGTGCTTCAGCTTCCCGATATCCGACGGTAGTGTNNNNNNNNTGTTGTGTGCTTGACA	19542973	19542997	+	0	44597_0349
2:19558223-19558402/19,24/-	0.979674	2	19558384	19558402	1	TTGTGGCGGTGGACATGGG	19558223	19558246	1	GGAACAAGGGAAGACGAGCTTGAA	19558247	19558383	AACTCCGTGAACCTTGATACTGGCCATGATGATCGAAGAAGAAGAAGAAGAAGAAGATTTGTTGGATCTGATTTTGAAATTGGAATTGGATGAAGAAGAATGAAGGAAGGTATGGTGTTTTATAGAAGGGGGAGAAA	GGAACAAGGGAAGACGAGCTTGAACTTCAGCTTCCCGATATCCGACGGTAGTGTNNNNNNNNTTGTGGCGGTGGACATGGG	19558327	19558349	-	0	44604_0350
2:19562905-19563084/16,29/-	0.966608	2	19563069	19563084	1	AATATGGCTAAACCCA	19562905	19562933	1	GCTTGAGAGGATCACCTCGAAAGCTGCTG	19562934	19563068	CTATAAATATACCCCCTTACTTTGAGTCCTGAGGCAGTCATTACCTCTCTTCTTCTTCTTCTTCTTCTTCTTCTTTCTTTGGGTTAGCTGAGAAATGGATGTAATGAAGCTTGATCACGACAGTGTATTAAAAGA	GCTTGAGAGGATCACCTCGAAAGCTGCTGCTTCAGCTTCCCGATATCCGACGGTAGTGTNNNNNNNNAATATGGCTAAACCCA	19562990	19563021	-	0	44606_0351
2:19593783-19593962/17,28/+	0.981359	2	19593783	19593799	1	TGGTGATGATCAGGGTG	19593935	19593962	1	CCTCGTCGGATTCAGGATTTGAAATCTG	19593800	19593934	ACCAAAATGCCACCTTCTGGAGAAATCGAAACTAGGTTTTTGCGATGAAGAAGAAGATACTCGGAGTGGTGATGATGATGATGATGATGATGGCAGATAACGGCAAGACATATAATATATAGTAGACCTACAAAT	CCTCGTCGGATTCAGGATTTGAAATCTGCTTCAGCTTCCCGATATCCGACGGTAGTGTNNNNNNNNTGGTGATGATCAGGGTG	19593869	19593891	+	0	44631_0352
2:19599448-19599627/16,28/+	0.970277	2	19599448	19599463	1	AGAAAAGTACAGAACA	19599600	19599627	1	GTGGGCTGAGATCATGTACTCATACAAG	19599464	19599599	TTTAGCAAACTACCTCTGTATATATATTGATATCCTGTAAGAAAAATCTAAATATTATTAATATCACCTTTGAAACAAACCAAAAAAAGAAAGAAAGAAAGAAAGACATTTGTATCACCTGACGTGTGTGTGGACT	GTGGGCTGAGATCATGTACTCATACAAGCTTCAGCTTCCCGATATCCGACGGTAGTGTNNNNNNNNAGAAAAGTACAGAACA	19599545	19599569	+	0	44636_0353
2:19625839-19626018/18,27/-	0.980192	2	19626001	19626018	1	AATCAGAATCAGACAGCA	19625839	19625865	1	GGTTGAGGAGGAATCTATTTCGGTAGC	19625866	19626000	ATATATATATATATATATATATATATATATATATATAGTACAAAAATCTGCAGGAGAAACGAAAGAGAGAGAGAGAGAACCCGAAGGACTGAGGAAGAAGCAGAAGACCAGAGAGACCGATTGGATCGGTAGGAT	GGTTGAGGAGGAATCTATTTCGGTAGCCTTCAGCTTCCCGATATCCGACGGTAGTGTNNNNNNNNAATCAGAATCAGACAGCA	19625964	19626000	-	0	44650_0354
2:19666424-19666603/16,29/+	0.97439	2	19666424	19666439	1	ATCGGGACGACGAGAT	19666575	19666603	1	GTCTGCAGCTTTGGTAAAGAGGATGATGA	19666440	19666574	TACACACTAAGGAATGAGTAATGATGATTGATAGGATCTAATAAGCCTTTAAATATATATATATATATATATATGTTGTTTCAGTAGTACGTAGTTACTAAACAATCAAACCTCAGATGTGTTTTTTAAAAGCAA	GTCTGCAGCTTTGGTAAAGAGGATGATGACTTCAGCTTCCCGATATCCGACGGTAGTGTNNNNNNNNATCGGGACGACGAGAT	19666492	19666513	+	0	44660_0355
2:19689208-19689387/16,29/-	0.956021	2	19689372	19689387	1	ATGGAATGATAGGGAC	19689208	19689236	1	ACTAGAAAAACAAGGAGGAAGTCTTTCCC	19689237	19689371	TTTTCTCTTGAATATAGTACAGACTAGAGAGAGAGAGAGAGAGAGATTGTTGAGAATACTTTCAATTTTTTTTTCTATAATAAGGCAATAATGCAATTTCACATTTATGTAAGAATGAAGTAAAAAGGAGAGAAG	ACTAGAAAAACAAGGAGGAAGTCTTTCCCCTTCAGCTTCCCGATATCCGACGGTAGTGTNNNNNNNNATGGAATGATAGGGAC	19689326	19689346	-	0	44672_0356
2:19690173-19690352/23,22/-	0.973814	2	19690330	19690352	1	GGCCTTTTACAGTCATGCGTGTG	19690173	19690194	1	GGTGTCCGGTGGGATAATCCTC	19690195	19690329	TTAATTATATATATATATATATATATGCTTTCTAATGTAATGATGCGGGAATGGGAAGTCTGATATGATCGTCTCCTCGCAGGTTCGAGATATCAAGATGAACACAAAGCTCCTTATCCATCCAGTTCATACAAT	GGTGTCCGGTGGGATAATCCTCCTTCAGCTTCCCGATATCCGACGGTAGTGTNNNNNNNNGGCCTTTTACAGTCATGCGTGTG	19690304	19690324	-	0	44673_0357
3:81430-81609/17,28/-	0.957087	3	81593	81609	1	TTTACAAACCGGGGTGC	81430	81457	1	GGACATTGTTCTGGGATATGACAGCGTC	81458	81592	TTCTATCATGTCTCTCCTTTTCCCCAATATAAATGGTTAGTGGACCATATCATATATATATATATATATATATCGTTTTGTACGTATTCATATATATTATTTAGTGAAATTCGAGTAATTTCCAGGAAAATTAGA	GGACATTGTTCTGGGATATGACAGCGTCCTTCAGCTTCCCGATATCCGACGGTAGTGTNNNNNNNNTTTACAAACCGGGGTGC	81520	81546	-	0	44726_0358
3:190331-190510/18,26/+	0.981366	3	190331	190348	2	TTGGGACAATGGCAATGG	190485	190510	1	GCTGCTAAAAGAGAGTGAGCTGACAC	190349	190484	CAAGAGAAGTGAGTCCTTTCTTCTTCTTCTTCTTCTTTTTCATAGTTTATATTATTATGTCTTATGAAACATATACTTATTGAGTAACATATAAACAGGAGTTTGAGAATGACTCAGGATCAAGCCAAGTGTTTTG	GCTGCTAAAAGAGAGTGAGCTGACACCTTCAGCTTCCCGATATCCGACGGTAGTGTNNNNNNNNTTGGGACAATGGCAATGG	190366	190389	+	0	44771_0359
3:205490-205669/16,29/+	0.964126	3	205490	205505	1	AGATCAGATCACATCT	205641	205669	1	GGGTTTTTGTTGTTGTTCTCTCCATGCAG	205506	205640	TTCTTCTTCTTCTTCTTCTTCTTCTTTCTTGATCTTTTTGGTTGTTACGAGCTTCTTCTTCTCTTTCTCTTCTCAAGCTCATTAGAACATCAATTTAAAACAGAAACTTTTACTATAGACCACGATAACAAATCT	GGGTTTTTGTTGTTGTTCTCTCCATGCAGCTTCAGCTTCCCGATATCCGACGGTAGTGTNNNNNNNNAGATCAGATCACATCT	205506	205535	+	0	44789_0360
3:225963-226142/16,26/-	0.982384	3	226127	226142	1	ACAAGGATAAAGAGAG	225963	225988	1	GGGCTTGTGCGTACTATTTGTAGCTG	225989	226126	AAATTGAGATCGAGAGAGTAGAAGAAAATGCTGACCTTGGTGTTCTCTTGAATAAGGCTCTGATTCTCAGAAATTTGGGTTATGAGTCAGAAAGAAGAGCTTGTTGAGGACGACGACGAAGAAGAAGAAGAAGAAGAA	GGGCTTGTGCGTACTATTTGTAGCTGCTTCAGCTTCCCGATATCCGACGGTAGTGTNNNNNNNNACAAGGATAAAGAGAG	225988	226009	-	10	44804_0361
3:229295-229474/16,29/-	0.98192	3	229459	229474	1	ACGAAATGGAAGAGGA	229295	229323	1	GCGTTGTTGAGCTTGTTCACTAGGCTAAG	229324	229458	ATCGCGTTACGAAAACCGATTCAGGATTTGTGTGAAAAAATCAACGAAAGTCTGGGGCTTTATATCAATTAGGGTTCAAAGCTTACCTCGCCATGATTCCCAAAACAGAGAGAGGGGGAGAGAGAGAGAGAGAGA	GCGTTGTTGAGCTTGTTCACTAGGCTAAGCTTCAGCTTCCCGATATCCGACGGTAGTGTNNNNNNNNACGAAATGGAAGAGGA	229323	229352	-	10	44807_0362_SNP_a
3:285890-286069/16,29/+	0.980792	3	285890	285905	1	TTCGAGGTCGAGGGTT	286041	286069	1	CGAGCTCTATCTAGTCGTAACGCGATTGG	285906	286040	TTAGCTCTATACACGGAATCAATCAAAAGGTACTTGTTTTTCTTGCGTGTCTTCCTCCTTAAACCTCAGAAAAGAAGAAGAAGAAGAAGAAGAAGAAAGTTGAAGTCTTTAGGGATGATGGCTATGTTCGTGAGA	CGAGCTCTATCTAGTCGTAACGCGATTGGCTTCAGCTTCCCGATATCCGACGGTAGTGTNNNNNNNNTTCGAGGTCGAGGGTT	285973	286002	+	0	44826_0363
3:301585-301764/17,28/+	0.972021	3	301585	301601	1	GTAAGAGCAGATACAAG	301737	301764	1	CCCGCAAGACCAAAATAACGAGCCTTGT	301602	301736	TTTCTTTGCCATCATGAAAAGATGAAATTGAATAACATGTTAGTAAATTGTAACGTAATATACACAAGACTCGATAGTAAAACAACAACAACAACAACAAGTGTAGTTTCCATTTTGTTAAAAGAAATCATGATT	CCCGCAAGACCAAAATAACGAGCCTTGTCTTCAGCTTCCCGATATCCGACGGTAGTGTNNNNNNNNGTAAGAGCAGATACAAG	301682	301701	+	0	44831_0364
3:317075-317254/17,27/+	0.979176	3	317075	317091	1	GGGGAGGCTCGGCGTTG	317228	317254	1	CGAGGTGGTTCCTGCGAGTATTCCGAA	317092	317227	AAAGGTTCCTGCGGATCACCCAAATTTAGATGCCATGAAGAAAAAGGCTATATCAGACTAGTGACTGATTCGATTGGAAAGAGAGAAGAAGAAGAAGAAGAAGCTTACCTTGGCGTTGACCTTGAGAGAAGGGTGA	CGAGGTGGTTCCTGCGAGTATTCCGAACTTCAGCTTCCCGATATCCGACGGTAGTGTNNNNNNNNGGGGAGGCTCGGCGTTG	317170	317194	+	0	44841_0365
3:364146-364325/17,28/-	0.980913	3	364309	364325	1	GACACCAAAGGGTAACA	364146	364173	1	GACCAGGTTGCTGGCCGTATTGCAGTTG	364174	364308	TTACTACTACTACTACTACTACTACTACTACGTTAGAGGTGTTTCTCTTTAAAAATGTTTTTATGCTAATACTAGTATCACTTTTGTTCTTCTTTCAGAGGAAGAAGGATCACTTCCAGTGGCCAAAGGGATTTG	GACCAGGTTGCTGGCCGTATTGCAGTTGCTTCAGCTTCCCGATATCCGACGGTAGTGTNNNNNNNNGACACCAAAGGGTAACA	364278	364307	-	0	44858_0366
3:373671-373850/21,24/-	0.859265	3	373830	373850	1	CATAGTTTCAGTTTGTTTATC	373671	373694	1	CCAATCTCAAAAAGTCTCCGACAC	373695	373829	ATAATTTGTTTTTTTTTTTGAATTTATATCATAAAATATTTCAATGTCATTTAAATATTATCCTGATTTCGTCTATCTCTCTCTCTCTCTCTCTCTCTCTCTATTTAAGACAAGCTAAAGGTAGAACTGTAGAGG	CCAATCTCAAAAAGTCTCCGACACCTTCAGCTTCCCGATATCCGACGGTAGTGTNNNNNNNNCATAGTTTCAGTTTGTTTATC	373728	373758	-	0	44860_0367
3:465491-465670/17,28/-	0.971274	3	465654	465670	1	GAGAGTACTTGAAGCTG	465491	465518	1	GCAGAAATCTTCTTGGAGAGGATCTTGG	465519	465653	AAAGGTAGATATGAAAATCTGCAACGTCAGCAGAGGTATATACATTAATGTGGATGATGATCATTTATAAACAGCATATATATATATATATATATATATATATATAGTTTGTATTGATCATGAAAGTGTGTTGCT	GCAGAAATCTTCTTGGAGAGGATCTTGGCTTCAGCTTCCCGATATCCGACGGTAGTGTNNNNNNNNGAGAGTACTTGAAGCTG	465548	465578	-	0	44892_0368
3:469998-470177/18,27/+	0.969415	3	469998	470015	1	TGTGATTCCTCGTCGAGT	470151	470177	1	CTCATGCACAAGAAGAATCAAGTCTTC	470016	470150	TACATAAATCAATAGCGGAAGTAATTGGATTTGTGAGTAGAGAGACTTAAGAAGAAGAAGAAGAAGAAGAATACCAAAGCAATGGAAACGGATCTGAATGATTATACTGTTATCAAGGAAGGAGAAGCTGAGATT	CTCATGCACAAGAAGAATCAAGTCTTCCTTCAGCTTCCCGATATCCGACGGTAGTGTNNNNNNNNTGTGATTCCTCGTCGAGT	470064	470086	+	0	44898_0369
3:489560-489739/17,28/+	0.961384	3	489560	489576	1	AGTCAATCATGCATAAA	489712	489739	1	GGGCTTGAAAGGGTTTCTTTGTTTCAGG	489577	489711	TCATCATTTTACAACAACAACAACAACAACAAAAAAAAAACTTGGATGGGCTGTACTCTGTAGTAACAAGAAGATATTTTGGTAACTTATGGACTGGACTGTATATTCATAGTTTGTACAATGCAAAAGCCCATT	GGGCTTGAAAGGGTTTCTTTGTTTCAGGCTTCAGCTTCCCGATATCCGACGGTAGTGTNNNNNNNNAGTCAATCATGCATAAA	489587	489608	+	0	44903_0370
3:559730-559909/17,28/-	0.864309	3	559893	559909	2	CTTGCCGTTTGCATTGC	559730	559757	1	GTTAGGTTTCTATATTCTTAACGGATCG	559758	559892	CATTTAAATATTGTATTTTTATATACAGTCGATCATAAATTTGTTATAATTTTATATATATATATATATATATAATTCATATGGATACACAATTATTCGGTTTTACACTAAACAAAACATCGCATTGATGGTATG	GTTAGGTTTCTATATTCTTAACGGATCGCTTCAGCTTCCCGATATCCGACGGTAGTGTNNNNNNNNCTTGCCGTTTGCATTGC	559819	559840	-	0	44948_0371
3:613787-613966/20,25/-	0.981808	3	613947	613966	1	CAAGAAAATGAAGTGTAGAG	613787	613811	1	CTCACCTCCACACAAATCAAACAAG	613812	613946	AGGTAGATGACAATGGAGGAAGAAGACATCTAAAGAAGAAGAAGAAGAAGAAGAAGAATCGTGTAAACAGAGAGGTGAGAGGTAGTGAAGAAAGAAAGAGAGAGAGAAAGACGAAAAGCAAAAAAGCGTTCTCGT	CTCACCTCCACACAAATCAAACAAGCTTCAGCTTCCCGATATCCGACGGTAGTGTNNNNNNNNCAAGAAAATGAAGTGTAGAG	613889	613914	-	0	44983_0372
3:640227-640406/18,26/+	0.9817	3	640227	640244	1	TGGGCTCTGTGTTTTGAG	640381	640406	1	GGGTTTTGTTTCTTCTCGATTGGCTC	640245	640380	GAAAAGCGATTTATCGAGAAACGAACTTAGGGCCACGCCAGAGAGAGAGAGAGAGAGAGAGAGGGAAATCGAATCTGGATTTTAGAGGAACTAGGGTTTGTATTTGTACTGCGAAAATCAATTAATGGTAAGTTTA	GGGTTTTGTTTCTTCTCGATTGGCTCCTTCAGCTTCCCGATATCCGACGGTAGTGTNNNNNNNNTGGGCTCTGTGTTTTGAG	640284	640307	+	0	45004_0373
3:824078-824257/16,29/+	0.981833	3	824078	824093	1	AGGATGACAAACACGC	824229	824257	1	GCTTGTTGAATCAAATTAGGGTTAGGGTT	824094	824228	CAAGCGTCTTGGTAAGCGAATTGTATCTCCAATTGATTCGATGGACGCATCAATTTCTGCTGTTGTTGTTGTTGTAGTTGTTGTTGTTGCATCATCATCATCATCTGTTGCTGCTGCTGTTGCTGAAATTTATTG	GCTTGTTGAATCAAATTAGGGTTAGGGTTCTTCAGCTTCCCGATATCCGACGGTAGTGTNNNNNNNNAGGATGACAAACACGC	824154	824182	+	10	45105_0374_SNP_a
3:843744-843923/16,29/-	0.897323	3	843908	843923	1	AAAGGATAATCATACA	843744	843772	1	CCAACTACGTCGTGGTCGAACAACGTTGG	843773	843907	AAATATATATATATATATATATATATAATTGTATTAATAGTTTACTTTTTAGGAATTTGAGAAAGCTGAAATATTTGACACATTTCCACCAATACGGAATACAATTCAAGAAAGATTGCAAAGAAGGAAAGCTAC	CCAACTACGTCGTGGTCGAACAACGTTGGCTTCAGCTTCCCGATATCCGACGGTAGTGTNNNNNNNNAAAGGATAATCATACA	843881	843905	-	0	45122_0376
3:895903-896082/16,29/+	0.908531	3	895903	895918	1	GGTAAAAATGAGGAGA	896054	896082	1	AAATGGACACTGAACTGAAGACAAGCAAC	895919	896053	TTAATTTATTTTAAAATATTAGCATGTATATATATATATATATGTATATATAGAATAGCTCTGGAAGTGAGATATGTGTGTAGATAATAGATCTGTCAGGAAGTCATACGTGAAATACAAAATTAAATAGTTTTA	AAATGGACACTGAACTGAAGACAAGCAACCTTCAGCTTCCCGATATCCGACGGTAGTGTNNNNNNNNGGTAAAAATGAGGAGA	895945	895970	+	0	45156_0377
3:942594-942773/20,22/+	0.890976	3	942594	942613	1	GACGCAATGTACGCATTTCC	942752	942773	1	CACTCTCTTTGCACGTGTGCCT	942614	942751	ATAAGTTTGTTATACTAGTTCTAACCATAACTAATATATTTACATTTAATAAGACCTAAGATAATAAATATATATATATATATATATATATATATATATATAGCGAAATACTAATTATAAACTTATTACTTTATTAAA	CACTCTCTTTGCACGTGTGCCTCTTCAGCTTCCCGATATCCGACGGTAGTGTNNNNNNNNGACGCAATGTACGCATTTCC	942674	942715	+	0	45181_0103
3:1063458-1063637/16,28/+	0.947966	3	1063458	1063473	1	GGTCGTTTTGTGCACG	1063610	1063637	1	GCTAATTACGAACGAGTTCGTAGTATCT	1063474	1063609	TAGTCTATATATTCTCCTAATATTAAATGCATTATTTATGTCTAATTAGACTTTTTATGTAAAGGCTTCATTGTTTATACATTCAAAACAAAGATTGCTAAGTGGAAAAATATATATATATATATATATATATATT	GCTAATTACGAACGAGTTCGTAGTATCTCTTCAGCTTCCCGATATCCGACGGTAGTGTNNNNNNNNGGTCGTTTTGTGCACG	1063583	1063608	+	0	45245_0378
3:1181596-1181775/16,29/-	0.96713	3	1181760	1181775	12	AGCATCTTCTTCTTCT	1181596	1181624	3	GAACCGGGTTTTAATTTCCCAATTGATAT	1181625	1181759	TTGAGAGAGAGAGAGAGAGAGAGAGTGTGTGTGAGAAAGAGAGAGACTTTATCCGTTCCTTGCAGACGCGGGAGCTTCTCCTGTGACTCTGTGTGAGTTTCCAGGCGTAGCTAGTCTTGTTTCCGGTTTCAAATT	GAACCGGGTTTTAATTTCCCAATTGATATCTTCAGCTTCCCGATATCCGACGGTAGTGTNNNNNNNNAGCATCTTCTTCTTCT	1181714	1181757	-	0	45319_0379
3:1192370-1192549/16,29/-	0.981524	3	1192534	1192549	8	CCCAAAAGAAAAGAAA	1192370	1192398	1	GCATTAATAATGGCGTAAGTGGAAGAAAG	1192399	1192533	AAATGAAAAATGGTAAAACCGTAATTAAGTGTAAAGTCAAGGGTAGTTCCATATTTCTCCCTTGTTGGTCGAGCGAGACCAGAAAATTCGCAGAGAGAGAGAGAGAGAGAGATAGATCTGAGAGTAGTGGTGGTG	GCATTAATAATGGCGTAAGTGGAAGAAAGCTTCAGCTTCCCGATATCCGACGGTAGTGTNNNNNNNNCCCAAAAGAAAAGAAA	1192418	1192442	-	0	45324_0380
3:1197291-1197470/20,24/-	0.966329	3	1197451	1197470	1	GTCATGCTAGATTCCTAAAC	1197291	1197314	1	GTCGTGGCTTTAGTGAGTGGAGGC	1197315	1197450	TTTTATAAAATTCTTTTTATTTTATTTTTTAAGTCGTCCTTCAAAGTTTTGTATTGACTTGACTTTCTCAGAGTTTCTTCGACGACATAAGAACCTCACTCCAACTCGAGAGAGAGAGAGAGAGAGAAAGATGAAG	GTCGTGGCTTTAGTGAGTGGAGGCCTTCAGCTTCCCGATATCCGACGGTAGTGTNNNNNNNNGTCATGCTAGATTCCTAAAC	1197320	1197343	-	0	45327_0381
3:1247943-1248122/16,28/+	0.976988	3	1247943	1247958	1	ATCAGGATGGAGAGGA	1248095	1248122	1	CATCAGTTGGTTGTTGGGGAAAACCATG	1247959	1248094	TCATCATCATCATCATCATCACGATTATATGAACGAGAATGAAATCTCGGTTGATCAGAAGCCTGGACACGACGATGTTGATCCTGATCTGGTTCTTTCATCGCAAAACCATGAGTTCTCATTGTCAGATAATAAT	CATCAGTTGGTTGTTGGGGAAAACCATGCTTCAGCTTCCCGATATCCGACGGTAGTGTNNNNNNNNATCAGGATGGAGAGGA	1247958	1247979	+	10	45360_0382_SNP_a
3:1256696-1256875/27,18/-	0.98699	3	1256849	1256875	1	GGTTTTCTAATTCCCCGAGAGTAACCA	1256696	1256713	1	TCCGGCACCAATCCCATC	1256714	1256848	ACAACCCAAAGCGATCAAAGAACTTTTCCCGCTAGAGAGAGAGAGAGAAGAAGAAGAAGAAGAAAAGTTACGCAGAGAGACTGAAAGAAGAGTGATCGATCGGAGAAAGATGGCGATGGAAGTAGCAACACCGGC	TCCGGCACCAATCCCATCCTTCAGCTTCCCGATATCCGACGGTAGTGTNNNNNNNNGGTTTTCTAATTCCCCGAGAGTAACCA	1256782	1256815	-	0	45367_0383
3:1306471-1306650/17,28/-	0.980421	3	1306634	1306650	1	GGTCATGCTGGTAGTTT	1306471	1306498	1	GATCGCTCCGAGATTTCTTATTGGTCTT	1306499	1306633	CACCTGCTAATGATTGTAGCATGAAGGAGAAGAAGAAGAAGAAGAAGACATACAGTAAATACTCCTATAATCCTTTACATTCAGAAAGAGGATCTCATGAAAACAGCAGAGATTAATTATATTAAGCAGGTATGT	GATCGCTCCGAGATTTCTTATTGGTCTTCTTCAGCTTCCCGATATCCGACGGTAGTGTNNNNNNNNGGTCATGCTGGTAGTTT	1306586	1306611	-	0	45388_0384
3:1335873-1336052/16,28/+	0.980187	3	1335873	1335888	1	CTGGGTCGTTCTACTC	1336025	1336052	1	TGTGAAAAGCCGTGTGCTTGCTTTCCTC	1335889	1336024	CAACTTCGCCTCCCGGAAAACAAAAACGAAGCACTAAAAGAAGAAGAAGAAGAAGACGAAGAGAGTGGATCGGTTACTGAAGAAGAAGAAGGTGGAGATTTCAATGGAGGAGGAGCGGGAAAGCGGGAAACAGTAA	TGTGAAAAGCCGTGTGCTTGCTTTCCTCCTTCAGCTTCCCGATATCCGACGGTAGTGTNNNNNNNNCTGGGTCGTTCTACTC	1335926	1335950	+	0	45398_0385
3:1364099-1364278/16,29/+	0.943429	3	1364099	1364114	1	AGAGATGATGAATGGG	1364250	1364278	1	GAGGGAGGAGGAAACAAGGCGGTTGCAGA	1364115	1364249	ACAACAAGTATGATGATGGCTGCAATGGGAGGAGGGTTTCCGGGTCTTGGTGGTGGTGGTGGTGGTGGTGGTGGTCATGGTTTTGGCTCGCTAAGCCCCATGTTTACACGGCCGTTCAATTTCGGTTTTGGTGTA	GAGGGAGGAGGAAACAAGGCGGTTGCAGACTTCAGCTTCCCGATATCCGACGGTAGTGTNNNNNNNNAGAGATGATGAATGGG	1364162	1364189	+	0	45420_0386
3:1365141-1365320/18,22/+	0.982803	3	1365141	1365158	1	GTGGTGGATGATGGTGTG	1365299	1365320	1	GTCTCTGGTTTTGTATCTTTCG	1365159	1365298	TGTGTATATGCAAATAATTCACTTTATAAAAGCTTATCGCTAATTTGACAGAACACTAGAACAGTTCTCTCTTTTTGTCGACAGTCTTCTTCTTCTTCTTCTTCTTCGATTGGATCTGGAACTGGTAAGCTCTTCTATAA	GTCTCTGGTTTTGTATCTTTCGCTTCAGCTTCCCGATATCCGACGGTAGTGTNNNNNNNNGTGGTGGATGATGGTGTG	1365243	1365265	+	0	45421_0387
3:1423482-1423661/16,29/+	0.983688	3	1423482	1423497	1	TAAGAGTCAAGAAGGA	1423633	1423661	1	GGCTCTCGAGCGAGACTTGGTAAAATCAG	1423498	1423632	CAAACAAAAAAGAGCAGCCTTTTTCCAAAGGCGTGATGGCGTTTGGAGAATTGGAAGAAGAAGACGAAGAAGAAGAAGAAACAAAAAAAAAAAAGTGTTTTTTTTTCCTTAAGAAACACAAACTCTTCTCTCAAA	GGCTCTCGAGCGAGACTTGGTAAAATCAGCTTCAGCTTCCCGATATCCGACGGTAGTGTNNNNNNNNTAAGAGTCAAGAAGGA	1423551	1423577	+	0	45454_0388
3:1448769-1448948/16,29/+	0.96305	3	1448769	1448784	1	TGGCGTTGCCGTACGT	1448920	1448948	1	GATGATAATCAGTTAGGACATACTGCTGG	1448785	1448919	TTCCACCTCTCTCTCTCTCTCTCTCTAGATACACACACATATGATACGAGATTCGAAATTTAGAACTGGGTTTTGAGTAGAAATATTCCAGTGTTCAAGTTATTTAGATATTCAGGCATGTATCTCAATTATTTT	GATGATAATCAGTTAGGACATACTGCTGGCTTCAGCTTCCCGATATCCGACGGTAGTGTNNNNNNNNTGGCGTTGCCGTACGT	1448791	1448810	+	10	45473_0389_SNP_a
3:1488448-1488627/16,25/-	0.982228	3	1488612	1488627	2	GGCGGTTGCTGTGTTT	1488448	1488472	1	CAGCTTGCAAGGAAATCTCCCAACT	1488473	1488611	AACAAGGACAGAGAGAGAAGAGAGAGACTTGAAAAAACACACTCAAAACTTGTGTTTTGTTTTATCTCTGTTTCAGGGTTTCTTATTTCTATGTCTGTAAAAAAAACTAAGAGAGAGAGAGAGAGAGAGGGCGGTGGCA	CAGCTTGCAAGGAAATCTCCCAACTCTTCAGCTTCCCGATATCCGACGGTAGTGTNNNNNNNNGGCGGTTGCTGTGTTT	1488483	1488502	-	0	45503_0390
3:1490876-1491055/16,27/+	0.982098	3	1490876	1490891	1	TGAGTGGAGGTGGAGG	1491029	1491055	1	GCGACATGTACCATCCGATGATGTACG	1490892	1491028	ATATTATCCAGGGCCGCCTCAGGCAAGTCAGCAAATGAACCAACAACAATATATGCAAATGATGATGAACCAACAGCAGCAACAACAACAACAACAACAAGCTGTAGCTCATGGTGGCTATGGCGGTGGTCACGGTG	GCGACATGTACCATCCGATGATGTACGCTTCAGCTTCCCGATATCCGACGGTAGTGTNNNNNNNNTGAGTGGAGGTGGAGG	1490962	1490991	+	0	45513_0391
3:1492041-1492220/17,25/-	0.980349	3	1492204	1492220	1	TTTGTCTGTGTGGGAGG	1492041	1492065	1	GGTACTATGTAAACCGGTATTTCGG	1492066	1492203	AAGAAGTAATATAAGAAGAAGAAGAAGAAGAAGACGAGCGTTTTTTTTTCTTTTTTTCTTTTCAAGTATCCATTAATTTCTCTCTTTAGTTATAGTCTCTGTAATGTGATTGGTCAAGACACGTATAATCACCCACCC	GGTACTATGTAAACCGGTATTTCGGCTTCAGCTTCCCGATATCCGACGGTAGTGTNNNNNNNNTTTGTCTGTGTGGGAGG	1492170	1492191	-	0	45515_0392
3:1514790-1514969/17,27/+	0.980871	3	1514790	1514806	1	GTAACAGAGCTCTGTAG	1514943	1514969	1	TTGTCGCTATATCGCTTCAGATTTCAC	1514807	1514942	AACAGAGCAATACCAACAAGAACAAGACATTTGCAAGCAACAGACTTTGAAAAGATTCTCAGATTCTTAGAACTTAACGGAGAATTCATCCGAGAGAGAGAGAGAGAGAGAGAGAGAGAGAGAGAGAGAGAGAAAA	TTGTCGCTATATCGCTTCAGATTTCACCTTCAGCTTCCCGATATCCGACGGTAGTGTNNNNNNNNGTAACAGAGCTCTGTAG	1514898	1514939	+	0	45525_0393
3:1552994-1553173/19,24/+	0.783401	3	1552994	1553012	1	AAACCAAATTAGACAGCCA	1553150	1553173	1	CAGTCGTTTACGATGATGTTCGCA	1553013	1553149	TTTTTTTTAGGCAATCATACTTGATCAAAAATAATATGAAAGTCAAAACTCACAATATATATATATATATATATATATATATTGATTATTGTTAAATTTTCAAAATTTTGACTAGCTATAACAATTTATCATTCAAA	CAGTCGTTTACGATGATGTTCGCACTTCAGCTTCCCGATATCCGACGGTAGTGTNNNNNNNNAAACCAAATTAGACAGCCA	1553067	1553094	+	0	45540_0394
3:1604827-1605006/17,28/-	0.968887	3	1604990	1605006	1	GCCAGAACACTAAAATC	1604827	1604854	1	GCTGCGCAGGCACGAGCCATTAAAGTTT	1604855	1604989	TTATATCCAGACAGGGTAAAGAGTTCTAAGAGATGAGAATTGAATCTGATACTCATATATATATATATATATATATATATATATACCTGGACCAATTGAGGGCCTGCCAATTTAAGGAAGGTGGCATTGGTCTGT	GCTGCGCAGGCACGAGCCATTAAAGTTTCTTCAGCTTCCCGATATCCGACGGTAGTGTNNNNNNNNGCCAGAACACTAAAATC	1604905	1604935	-	0	45564_0395
3:1628260-1628439/16,27/-	0.980612	3	1628424	1628439	1	GATTAATCCGGTGGAG	1628260	1628286	1	TCTCACTAGCCGGATTTCCCGCCAAGC	1628287	1628423	AAAAGAACAAACAAACAAACAAACAAACATTTATTGAATCCCTAAAATAAGATTAATTATTTTCCCTAATTAGAAACTCATAAGGAAACAGAGAAGACCATAAAACCACAAGCCTATTTTTTGTCTTTTCAACAGTT	TCTCACTAGCCGGATTTCCCGCCAAGCCTTCAGCTTCCCGATATCCGACGGTAGTGTNNNNNNNNGATTAATCCGGTGGAG	1628395	1628418	-	0	45577_0396
3:1704061-1704240/17,24/-	0.984001	3	1704224	1704240	1	GGAATTGGGGGACGATG	1704061	1704084	1	GTGTGTGTGTGAATTGATGATGTG	1704085	1704223	AAAACAGATTTGATTTAGCATTTGCAGTTTTGTGGATTTGGGTTAAGAGTAGAGAAACCTAAAGAACTAAAGAAGAAGAAGAAGAAGAAGAAGAAGAAGCGGAGCGGAGAGGGAGCTTGTGAAAACGAAGAGATGCATA	GTGTGTGTGTGAATTGATGATGTGCTTCAGCTTCCCGATATCCGACGGTAGTGTNNNNNNNNGGAATTGGGGGACGATG	1704125	1704154	-	0	45602_0397
3:1756073-1756252/19,26/+	0.965281	3	1756073	1756091	1	CTTTCCCAATGAAAAAGCT	1756227	1756252	1	TCCCAGGAATATACCCAAGTAGCGTC	1756092	1756226	TCATACAAGAAAACTATATCAAAAATGACTCTGAGAGTGAGCCAAAGGGTAAAGAGAGAGAGAGAGAGAGAGAGCTTACAAGGAGATGATGATAGATGGTAAATCATTTGGTGAGGACATAAATGGCGTATATGA	TCCCAGGAATATACCCAAGTAGCGTCCTTCAGCTTCCCGATATCCGACGGTAGTGTNNNNNNNNCTTTCCCAATGAAAAAGCT	1756144	1756165	+	0	45622_0398
3:1791867-1792066/16,29/-	0.794382	3	1792051	1792066	1	GTGCTCTTGATCGCTG	1791867	1791895	1	CAAATAATTTGGAGAAGACTTGAAAACAC	1791896	1792050	TTCTTTAATCAACTCCATTTTTGTGAGTTCTTGAAATTAAATGTATTCCTTTGAATTTGAAATAATGAATTTGATTCAAAAATCTGAATTATTTTATTTTTACCTCCATTTGAAAAAAGGAAAAATAGTGTATTATTATTATTATTATTTTATGA	CAAATAATTTGGAGAAGACTTGAAAACACCTTCAGCTTCCCGATATCCGACGGTAGTGTNNNNNNNNGTGCTCTTGATCGCTG	1791898	1791920	-	0	45639_0073
3:1813935-1814114/25,19/-	0.980221	3	1814090	1814114	1	TCTCCTTCAATACATCTTCTTGATC	1813935	1813953	1	GGTCTCTGTCTCTATGTGG	1813954	1814089	TTTGAACTTTCTCAACACCCTTTACTTTGATTTCTTCTTCTTTTTCTTCTTCTTCTTCCTTGTATTCTGGAATCTCTTCTTCGTTATCTCTCACGGTCTCGATTGTTTCTTCCTCTTCTTCTTCTTTTTCTTCTTT	GGTCTCTGTCTCTATGTGGCTTCAGCTTCCCGATATCCGACGGTAGTGTNNNNNNNNTCTCCTTCAATACATCTTCTTGATC	1814032	1814058	-	0	45654_0400
3:1855875-1856054/21,23/-	0.98349	3	1856034	1856054	1	GATGGTAACACGACAAAAAGC	1855875	1855897	1	TCATATGCAGAGACACTCATGTG	1855898	1856033	TTGAGGAATTAATGTCATTTTGTGAAGAAGAAGAAGAAGAAGAAGAAGAAGAAGAAGAAGAAGAAGAAGAAGAAGAAGAAGAAGAAGAAGAAGAAGAAGAAGAAGAAGAAGAAGAAGAAGAAGAAGGAGAGCCATG	TCATATGCAGAGACACTCATGTGCTTCAGCTTCCCGATATCCGACGGTAGTGTNNNNNNNNGATGGTAACACGACAAAAAGC	1855904	1856010	-	0	45678_0402
3:1986399-1986578/16,26/-	0.984872	3	1986563	1986578	1	AAAGTCCTGGAAGGAG	1986399	1986424	1	GTGGTGGGTTTGGTGGGCGTGGTGGT	1986425	1986562	CGAACCAGCAAGTACCGCCTCAAGTAAGAGATATTGCAATGCGTGGTGGTGGTGGTGGTGGTCCCGGTTATAGCCAGGATCGAAGAGGTATGGTTAACCGGTTTGACTCTGGCGGTGGTGGTACCCGTTGGGATTCTG	GTGGTGGGTTTGGTGGGCGTGGTGGTCTTCAGCTTCCCGATATCCGACGGTAGTGTNNNNNNNNAAAGTCCTGGAAGGAG	1986501	1986520	-	0	45781_0403
3:2005793-2005972/18,27/-	0.978104	3	2005955	2005972	13	TGTTGTTGTTGTTGTAGT	2005793	2005819	1	GCATCCACAAGTACTTCATTGTGTCTT	2005820	2005954	CGTAATTCATGAATTGATTGTTAGAGGTTGTGATGCAAGATGACGTGCCGGCTGATCCTGTGGTGGTGGTGGTTGTGGTGGTGGCTGCTGCTGCGGATGAGGCCGAGGCTGACTGAATCCTCTCGACTAGTCGAG	GCATCCACAAGTACTTCATTGTGTCTTCTTCAGCTTCCCGATATCCGACGGTAGTGTNNNNNNNNTGTTGTTGTTGTTGTAGT	2005871	2005895	-	0	45797_0404
3:2102414-2102593/21,23/-	0.980474	3	2102573	2102593	1	GGAGAGAGAAAGAGAAGTGCG	2102414	2102436	1	TGTGGAAGAGATGTCCCAAAATC	2102437	2102572	AAGAAGAAGGAGAGAAAAACCCTAGAATTAGATAATGGAGTTGAGAAGAAGAAGAAGAAGAAGAAGAAGAAGAAGAAGAAGAAGAAGAAGAAGAAGAAGTCTCTCGAGAGAGGATTGGCTTTAAGTGAAGGGTAAA	TGTGGAAGAGATGTCCCAAAATCCTTCAGCTTCCCGATATCCGACGGTAGTGTNNNNNNNNGGAGAGAGAAAGAGAAGTGCG	2102474	2102529	-	0	45854_0405
3:2132739-2132918/16,27/-	0.983217	3	2132903	2132918	1	CAAAGAAACCCTAGAA	2132739	2132765	1	TTGTTTCTACCTGTTATACCCTCGAGT	2132766	2132902	GGACGGTAGAGAGAGAGAGAGAGAGAGAGAGAGAGAGAGAGAGAGAGAGAGAGAGAGAAAAGGTGGGAAGAAGAAATGGAAGCGAAAGACTTGTTACCGAACTACAACTTCGGACAAGGACACAAGAAGACAACGTT	TTGTTTCTACCTGTTATACCCTCGAGTCTTCAGCTTCCCGATATCCGACGGTAGTGTNNNNNNNNCAAAGAAACCCTAGAA	2132845	2132895	-	0	45871_0406
3:2192718-2192897/17,24/+	0.980988	3	2192718	2192734	1	AATGGTCCGGTCTGACC	2192874	2192897	1	TTGCGTTACACCAGCACTTCCTCC	2192735	2192873	AATTTACCGCTCCCTAACTAACCGTATACGCACCGTTTTAAAGTCTTTCCCTAATCAGAATCTTGAGATTACACAGAGAGACAGGGCAGCAAACAAAGAAGAAGAAGAAGAAGAAGAAGAAGAAGAAGAAGAGGATGAG	TTGCGTTACACCAGCACTTCCTCCCTTCAGCTTCCCGATATCCGACGGTAGTGTNNNNNNNNAATGGTCCGGTCTGACC	2192830	2192866	+	0	45897_0407
3:2304124-2304303/18,27/-	0.980184	3	2304286	2304303	1	CAATACAATCAAAACAGA	2304124	2304150	1	GGTGGGTAACAATGGTATCAACTCTGT	2304151	2304285	TATACAAGCGAGGAAGTGAGAGGAACAGAAGGAGTTGGTCTGGAGGAAGAAGAAGAAGAAGAAGAGAACCAAAACTGGGAGGAACAGAGGAAGATTCAGGAGGAAGAAGGAACAGAATCTCACGAAGGTAATAAT	GGTGGGTAACAATGGTATCAACTCTGTCTTCAGCTTCCCGATATCCGACGGTAGTGTNNNNNNNNCAATACAATCAAAACAGA	2304218	2304240	-	0	45963_0408
3:2321309-2321488/21,19/-	0.983485	3	2321468	2321488	1	GTTTCAGTTTCATTGGCTGGG	2321309	2321327	1	ACGCACCCATATGCCAACA	2321328	2321467	GTTTTGAGAGAGAGAGAGAGAGAGATTCTTCTTCGTCTCGTAAAAGAGTAATAGTTGTAATAAAAAAAAGAAAAGAAAAAGACACAGAAGAAACATTACAGTTATATACAGAAAGAGAAGGTATATATATATATATAAAC	ACGCACCCATATGCCAACACTTCAGCTTCCCGATATCCGACGGTAGTGTNNNNNNNNGTTTCAGTTTCATTGGCTGGG	2321443	2321462	-	0	45985_0409
3:2365002-2365181/16,29/+	0.804667	3	2365002	2365017	1	CAAGAAACAGGTTGAC	2365153	2365181	1	CATACGATTTCTTACCTAGCGATGCAGTG	2365018	2365152	ATATATGATGAGTATATGACTTCTATCTATATATATATATATATATATTTAACACATGTAAATATATTTCTATAATTCTTAATAAATTGAAAAAAATATTTTCTTCTAAATAAAACTATTAATAAAATAAAAAAA	CATACGATTTCTTACCTAGCGATGCAGTGCTTCAGCTTCCCGATATCCGACGGTAGTGTNNNNNNNNCAAGAAACAGGTTGAC	2365041	2365065	+	0	46010_0410
3:2420210-2420389/16,29/+	0.910468	3	2420210	2420225	7	TTGTTCTCTTTCTCTC	2420361	2420389	1	GTGTGTGAAGAAGCAGTTGAGAATTCAAC	2420226	2420360	TCTCTGGATCTGAAAGATGAAAGAGAGAGGAAAGTAAATGACTAATGAAGAAGGATCATGATGATGACGACGACAATGAATTGTATATATATATATATATATATATATATATATATATCTTGTTTATGAGATAGT	GTGTGTGAAGAAGCAGTTGAGAATTCAACCTTCAGCTTCCCGATATCCGACGGTAGTGTNNNNNNNNTTGTTCTCTTTCTCTC	2420309	2420343	+	0	46042_0411
3:2422564-2422743/21,24/-	0.966469	3	2422723	2422743	1	TGTTGACAGATCTCCTCCGGT	2422564	2422587	1	GTGGTCTTTGATCTGCTGATTTCG	2422588	2422722	AGAGAGAGAGAGAGAGAGAGAGAGAGTTCTCTGAAAAAACTGCGTAAATCCTAACTCGTCAATGGCGGATTCGAGCTCCAATCAGAATCGATACACTCCTCCTAATCAAAGGTAACTTCTTCTTCTTCTTCTTCA	GTGGTCTTTGATCTGCTGATTTCGCTTCAGCTTCCCGATATCCGACGGTAGTGTNNNNNNNNTGTTGACAGATCTCCTCCGGT	2422697	2422722	-	0	46044_0412
3:2441589-2441768/16,27/-	0.982001	3	2441753	2441768	5	AAACAAAGCCTAGAAA	2441589	2441615	1	GCAAAGGGACATGTAGGCGCTTCTGAC	2441616	2441752	CAGAGAAGATGATGACTATTCCAGAACTTCTTCTTCTTCTTCTTCTTCTTCTTCTTCTTGTTGTGGCTTCTCTCTCTCTCTCTGGAGGAAGAAATGAAAAAAAAAAATGAATGGATAGACAATGGGTGGGTGTGTCC	GCAAAGGGACATGTAGGCGCTTCTGACCTTCAGCTTCCCGATATCCGACGGTAGTGTNNNNNNNNAAACAAAGCCTAGAAA	2441694	2441726	-	0	46060_0413
3:2510745-2510924/17,28/-	0.954857	3	2510908	2510924	1	TCCGTCTACATCATCGG	2510745	2510772	1	GGGAGGGTACGTTGAATAGGCATCACAT	2510773	2510907	TGATCTTTCTCTTCTTGAAACTCTTCTCTGAAGCCATGAATGAAGAGAATCAGAAGCAAGAGTTTTTGATATCGAGATGGAGAGAGAGAGAGGAGAAGAAGAAGAAGAAGAAGAAGAAGATGATGGAGGAAAAAA	GGGAGGGTACGTTGAATAGGCATCACATCTTCAGCTTCCCGATATCCGACGGTAGTGTNNNNNNNNTCCGTCTACATCATCGG	2510788	2510825	-	10	46105_0414_SNP_a
3:2514134-2514313/16,29/+	0.981288	3	2514134	2514149	3	GACAAAGACACCAAAA	2514285	2514313	1	CGATGCTCTTAGTCGACAGATGAGCGAAT	2514150	2514284	TTCTTGAGGGCGAGAGAGCTGATTGATGTCTTTGGTATCTGGAGCCAGGGACATGGGGTTCGACGACAACAACAACAACAAGAACAACAAGGATGGAGATGATGAGAACTCCTCCTCCAGAACAAGAGCCGACGA	CGATGCTCTTAGTCGACAGATGAGCGAATCTTCAGCTTCCCGATATCCGACGGTAGTGTNNNNNNNNGACAAAGACACCAAAA	2514215	2514239	+	0	46108_0415
3:2538200-2538379/16,29/-	0.921538	3	2538364	2538379	1	GAAGATTGGATGAAAG	2538200	2538228	1	AATTTTTCTCTACTTTGGTGAACTGGTTA	2538229	2538363	TAGTGAATAATAAATACAAGTCACCGTATCTGTACACATACTTTCTTTCACGTTTGAAGAAACGAAGTACAAAGAATAACAACAACAACAACAACAAAAAGGTGCAGAGTATTGAACTTTAGTTACAAAAGAATC	AATTTTTCTCTACTTTGGTGAACTGGTTACTTCAGCTTCCCGATATCCGACGGTAGTGTNNNNNNNNGAAGATTGGATGAAAG	2538267	2538286	-	0	46118_0416
3:2583797-2583976/16,29/-	0.970207	3	2583961	2583976	1	CTGTTCTGTTGCTGTT	2583797	2583825	1	GCTGGGAAACCAAAAGGCGGAATTACTGA	2583826	2583960	CATGGACAAACATGTTAGTTTTCTTTCTTGTTGCAGGATGACTTAGATGGAAATGATGATGATGACGATGATGATGATGAAGACAAGTCTAAGATTAATGCACCACCCCAGTATAAACATTTGATTGCAATCCAT	GCTGGGAAACCAAAAGGCGGAATTACTGACTTCAGCTTCCCGATATCCGACGGTAGTGTNNNNNNNNCTGTTCTGTTGCTGTT	2583881	2583908	-	0	46146_0417
3:2596381-2596560/16,29/-	0.975488	3	2596545	2596560	2	GGAAGAAGCAGATATT	2596381	2596409	1	CGTGTTTTGGTCGTCTGAGATCTCATCGG	2596410	2596544	AGTGGAGCTCTGTGATGGTGAGTCGATTTCATGGTTAGCTCCACCACTTTGAAAAACAAAAAAAAGTTTCGGAGGAAGAAGACGAAGAAGAAGAAGAAAGACGCGATTCTGAGATCTTTCTTTTTATTTTATTTT	CGTGTTTTGGTCGTCTGAGATCTCATCGGCTTCAGCTTCCCGATATCCGACGGTAGTGTNNNNNNNNGGAAGAAGCAGATATT	2596447	2596470	-	0	46151_0418
3:2612409-2612588/17,27/-	0.964613	3	2612572	2612588	1	AAAGGTGGGAGACACAG	2612409	2612435	1	GAATGAATGGTCGCCGGTGGAAAAGAG	2612436	2612571	GAATAAAAAGTCGCCGTCACGTCTGAGTAGAAAAAGGGTAAAAAGGGGAAATGGTGAAGAGAAGAACAAATCGAGGAATGAGGGTTAAGGAGCAATGGAGGAAGCTGAGGAGGAGGAGGAGGAGGAGGAGGAGAGA	GAATGAATGGTCGCCGGTGGAAAAGAGCTTCAGCTTCCCGATATCCGACGGTAGTGTNNNNNNNNAAAGGTGGGAGACACAG	2612435	2612465	-	0	46163_0419
3:2670616-2670795/16,25/-	0.977006	3	2670780	2670795	2	GTGGTGGCTGAGCTTG	2670616	2670640	1	GCATGAGGAGAGCCGCCTTGAGGGT	2670641	2670779	TCCTCCATAGCCTCCGTACATGTTGGGATTATAATTGTTGTTTGTGACGTGTCCGTTGTGGCCAAAGGGTGGCGGCATGTGGCCTCCTGTCATTGGAGGGAGGAACATCCCGAACATGTTGTTGTTGTTGTTGTTGGTA	GCATGAGGAGAGCCGCCTTGAGGGTCTTCAGCTTCCCGATATCCGACGGTAGTGTNNNNNNNNGTGGTGGCTGAGCTTG	2670644	2670663	-	10	46206_0420_SNP_a
3:2681250-2681429/16,29/+	0.958718	3	2681250	2681265	1	CATTTGGGAAGGTCTC	2681401	2681429	1	CGGCTTGAAGAGTATATCGATTGGTTTCC	2681266	2681400	ATGCATTATATCCTCTGTTCTCTTCACATCTTTGCTTATGGTATGAATTCCAAACTCTGAAAGCTATTGATTACAAGAAACACACAACAACAACAACAACAAAAATTGTTACAATAATACTCACGGTTTCCAAAT	CGGCTTGAAGAGTATATCGATTGGTTTCCCTTCAGCTTCCCGATATCCGACGGTAGTGTNNNNNNNNCATTTGGGAAGGTCTC	2681344	2681367	+	0	46211_0421
3:2769079-2769258/20,24/-	0.942541	3	2769239	2769258	1	AGAGGAGGAGGAGGAAGAGG	2769079	2769102	1	CGGAGGTGGATCAGCGAGGAAAGT	2769103	2769238	ATAGGTATAGGAGATTAAACGGTGGAATGGTGGAGAGATCGTTATCGGAGTCATGGCCGGAGCTGAGGAATGGAGGAGGAGGAGGAGGAGGGCCGAGGATGGTGAGGAGTAATAGCAATGTGAGCTGGAGGAGTTC	CGGAGGTGGATCAGCGAGGAAAGTCTTCAGCTTCCCGATATCCGACGGTAGTGTNNNNNNNNAGAGGAGGAGGAGGAAGAGG	2769148	2769167	-	0	46233_0422
3:2994716-2994895/17,28/+	0.976755	3	2994716	2994732	1	AGGACACAAAGCCCAAA	2994868	2994895	1	GCACCACGTTGTCCGACTCTAGGGCTGG	2994733	2994867	TCCGCGGCTTTCTCGATATCCACATTATCGTTATTGCTGTTCCGGTTCTTAAAGCTTAACTTGGGGATTAGATTCTTCAGGCTATTAGGTTTGTTTCTTGAAGAAGAAGAAGTAGAAGAAGAAGGACTCAAGGAT	GCACCACGTTGTCCGACTCTAGGGCTGGCTTCAGCTTCCCGATATCCGACGGTAGTGTNNNNNNNNAGGACACAAAGCCCAAA	2994832	2994856	+	0	46340_0423
3:3024792-3024971/19,22/-	0.982389	3	3024953	3024971	1	GAAGAGAGTGATGGAGAAG	3024792	3024813	1	GGAAGGTATTGGTGGCAGTGAG	3024814	3024952	AAGAGATGAATGATGATGATGATGATGAATCTGGAGATGAAGGAAGCAGTGGATCTTCTGAATTATCTGAGAGTGACAGCTCGGAAGATATGTTTGGAAGTTATTCCGAGATTGATGATGATGTTGCCAAGGATTACTT	GGAAGGTATTGGTGGCAGTGAGCTTCAGCTTCCCGATATCCGACGGTAGTGTNNNNNNNNGAAGAGAGTGATGGAGAAG	3024925	3024948	-	0	46357_0424
3:3069237-3069416/16,28/+	0.974574	3	3069237	3069252	1	CAAAAAGAAAGCTCAG	3069389	3069416	1	AGCCGACGACGGTGGCTCCGGCGGTGCA	3069253	3069388	TTAGCTATTTTCTCTACCACAGAAGAATCTAGACCCAGAGAGAGAGAGAGAGAGAGAGAGAGAGATCAGTAACGAGAGAGTCAAAGAGAGGAGATTTCAGTGAAGATGAAGGAGATGCAGGCAATAGAGACGTCGC	AGCCGACGACGGTGGCTCCGGCGGTGCACTTCAGCTTCCCGATATCCGACGGTAGTGTNNNNNNNNCAAAAAGAAAGCTCAG	3069289	3069317	+	0	46381_0104
3:3098786-3098965/16,29/+	0.958933	3	3098786	3098801	1	AGAGCAATATCAAGAG	3098937	3098965	1	GCCTCAAATTGCTTGGAGAAACCAAAAGG	3098802	3098936	CATCTCTCTCTCTCTCTCTCTCTCTCTCTCTCTCTCTCTCTCTCTCTCTCTCTCTCTCTCTCTCTTTATCTTTCTCTATACCACGAAAGTAGCGTTTTTTCAAATACTAGAAATACTATTTTTTATTGGAGGCTA	GCCTCAAATTGCTTGGAGAAACCAAAAGGCTTCAGCTTCCCGATATCCGACGGTAGTGTNNNNNNNNAGAGCAATATCAAGAG	3098804	3098878	+	0	46402_0425
3:3259933-3260112/17,28/+	0.984084	3	3259933	3259949	3	AACAGAACCAATCCAAA	3260085	3260112	1	GTGTATTGTGATGAGTTTGCCAAGTTGG	3259950	3260084	AATAAGTTGTTATACAGAGTAAATTAAAGGGATAATGAAGAGACAAAACATACATCACTCAAGTAATTGTCTAAATTTACACATCTTTTGTTATGTTTTTTTTGTCTCTCTCTCTCTCTCCTCTCTCTAGCTCTT	GTGTATTGTGATGAGTTTGCCAAGTTGGCTTCAGCTTCCCGATATCCGACGGTAGTGTNNNNNNNNAACAGAACCAATCCAAA	3260054	3260077	+	0	46501_0426
3:3289602-3289781/22,22/-	0.937565	3	3289760	3289781	1	AATTTCAAAAGGATGAAAAGGG	3289602	3289623	1	GGAGATTTTGAGTAGGCCTTGG	3289624	3289759	AAGGAGAGAAATTCGAAGAAGGGGAGGTGAAGAAGAAGAATCGGAGGAATGAATGTGACACTTTCTTCATCATTTCTTCTTCTTCGTTAATTAAAAATAAAATTAGCTGTAAGAAAATAATAATAATAATAATAAT	GGAGATTTTGAGTAGGCCTTGGCTTCAGCTTCCCGATATCCGACGGTAGTGTNNNNNNNNAATTTCAAAAGGATGAAAAGGG	3289624	3289644	-	0	46518_0427
3:3321011-3321190/22,18/+	0.980744	3	3321011	3321032	1	TGCTGAGATTCTCGCTGAGGTG	3321173	3321190	1	GCTTAAGGTCCGATGGGG	3321033	3321172	TCTTTAGCTTCTTCTTCTTCTTCGTCTTCTTAAACATTCAACAATTTAAGAATTCGTCTAAAGAACTCTTTTTTGTTGTTGTTGTTACTGTAGGCACCTCACTGGATAACCTATGACTTCCCTCCTGATGTTAGGGAGAA	GCTTAAGGTCCGATGGGGCTTCAGCTTCCCGATATCCGACGGTAGTGTNNNNNNNNTGCTGAGATTCTCGCTGAGGTG	3321040	3321063	+	0	46535_0428
3:3356465-3356644/16,28/-	0.897278	3	3356629	3356644	1	GAAATGGTTGGCATAG	3356465	3356492	1	GGTCACCACTCACCACAATTCAAACATG	3356493	3356628	AGATATAAGAATAGGAATTTGGGGAAATACCAAAAACATTATATATATATATATATATATATGCCTTCTTATCATAAATCCTTAGAAAAAATCAAAACAGAGTTTTTAAATCGATGATTTATAATAATTTTTGTAT	GGTCACCACTCACCACAATTCAAACATGCTTCAGCTTCCCGATATCCGACGGTAGTGTNNNNNNNNGAAATGGTTGGCATAG	3356567	3356589	-	0	46549_0429
3:3393662-3393841/17,28/+	0.963126	3	3393662	3393678	2	CACACATAATATCAACA	3393814	3393841	1	GTTGTTATGAAACCAGATTGGTTGGTGG	3393679	3393813	TGACTGGTTCATACACCTTTTACAGGATCACTTAACACAACACACACACACACACACACACTTGATCCCAGACTTGAATTGAATCTTGCTTGGTTGTGGAAAAAAGCCCAGGACTAGCCCAAACCAGATTATTTT	GTTGTTATGAAACCAGATTGGTTGGTGGCTTCAGCTTCCCGATATCCGACGGTAGTGTNNNNNNNNCACACATAATATCAACA	3393713	3393739	+	0	46580_0430
3:3403286-3403465/17,28/+	0.910611	3	3403286	3403302	1	GGAAATAAAGGTGAAGG	3403438	3403465	1	GGGTAGTCAATGGGTAATAATTGTGTGT	3403303	3403437	AATTTTAGAGAGAAATATATATATATATATATATATATATATATATATATATATATATATAAAAATCAATTTATCGTTTTGGTTGTGGATCCGACTTTTGCATATGGTCACTGATTTATTGCATATTCATAGTTG	GGGTAGTCAATGGGTAATAATTGTGTGTCTTCAGCTTCCCGATATCCGACGGTAGTGTNNNNNNNNGGAAATAAAGGTGAAGG	3403317	3403363	+	10	46584_0105_SNP_a
3:3405244-3405423/24,21/-	0.951316	3	3405400	3405423	1	GTGCACGTATTAGCGTTTTATGCT	3405244	3405264	1	TCTCCACTAGCCCAATATGCA	3405265	3405399	ACATATATAAAACAACTATTGAATGCTAATAGAGAATCCACAATGATTGAACGGTTATAAACGAATATATATATATATATATATATAAGCTTAACTCACGAAGAACTTTTCAGACTGAATGAAATGGTTTTAATT	TCTCCACTAGCCCAATATGCACTTCAGCTTCCCGATATCCGACGGTAGTGTNNNNNNNNGTGCACGTATTAGCGTTTTATGCT	3405313	3405335	-	0	46585_0431
3:3447543-3447722/20,25/-	0.951823	3	3447703	3447722	1	CAAATTCCTGCGAATAACAG	3447543	3447567	1	GACTGGAAATCGCAGAAAACACTGC	3447568	3447702	TCGAGAAACGCATTAGGATGAAGAAATTTTCACAGAGAAATGGAATTTGAAGAGAAAAATCTTAGAGTTTCTTCGATTTGATAATGGCTAGTATGAGAGAGAGAGAGAGAGAGAGAGTTAAAACAAAAAGGTATA	GACTGGAAATCGCAGAAAACACTGCCTTCAGCTTCCCGATATCCGACGGTAGTGTNNNNNNNNCAAATTCCTGCGAATAACAG	3447586	3447608	-	0	46606_0432
3:3476835-3477014/21,24/-	0.981686	3	3476994	3477014	1	TTCTTAATCGGTCCGGTTATG	3476835	3476858	1	GCGGGTGATTGGGGATTTGTGGTG	3476859	3476993	AAGAAATCGTCCGGTGCTGTTGTTAAATCGGCGTTGATGAACCCTAATTTGAATCCTACTGGATCTAAATCAACTGGTAGCTCTCTCGATGACGATGATGATGATGATGATGACGACGAAGAAGATGATGATGAT	GCGGGTGATTGGGGATTTGTGGTGCTTCAGCTTCCCGATATCCGACGGTAGTGTNNNNNNNNTTCTTAATCGGTCCGGTTATG	3476858	3476906	-	10	46632_0106_SNP_a
3:3508241-3508420/16,29/+	0.982725	3	3508241	3508256	1	GAGAGAGTTTTGTATG	3508392	3508420	1	GTCTTCCTTTCTTTGCACAGCAAGGCGGG	3508257	3508391	CTTTAAAATTAAGAAGGTTAAAGAAAAAAAGAGAAGAAAAGAAAAAAAGTTGATTAACATATTGATTAAAACATGAGAACCAGAGTCTCTCTGAGAGATCATCATCATCATCATCATCAATTGATCAGCATCACT	GTCTTCCTTTCTTTGCACAGCAAGGCGGGCTTCAGCTTCCCGATATCCGACGGTAGTGTNNNNNNNNGAGAGAGTTTTGTATG	3508354	3508375	+	0	46656_0433
3:3578418-3578597/18,27/+	0.967234	3	3578418	3578435	1	GGAGCACACACAGATAAG	3578571	3578597	1	CAGATGGGGGGAAATGGACGAAGACGA	3578436	3578570	ATAGGAAACCCTAAAAGTGCTTCTTCTTCTTCGTCTTCTTCTTCAGTTTTAGGTTACGATCGAAGCAAAAGCGGCGCATCTGAATCCCAAACGAGTGACGATGACGATCGATTCGCAGCAAAAAACGAGCAAATT	CAGATGGGGGGAAATGGACGAAGACGACTTCAGCTTCCCGATATCCGACGGTAGTGTNNNNNNNNGGAGCACACACAGATAAG	3578455	3578479	+	0	46708_0434
3:3706457-3706636/16,29/-	0.981462	3	3706621	3706636	2	GGAAAAAGAGAATGAG	3706457	3706485	1	GAGGATGAAGACAAGAATGGCAAAACACG	3706486	3706620	ACTCGAGACTGCGAGAATGAATCTGTACCTTGCAAAAGAGATGTTCCTGAGATCGAGGAAGAAGAATGTGTTGATGATTTAAAGGAAGAAAACAAAAGTTCTCCTTCTTCTTCTTCTTCTTCTTCTTCTTCTTCT	GAGGATGAAGACAAGAATGGCAAAACACGCTTCAGCTTCCCGATATCCGACGGTAGTGTNNNNNNNNGGAAAAAGAGAATGAG	3706486	3706522	-	0	46800_0435
3:3728767-3728946/18,27/+	0.979156	3	3728767	3728784	1	TGGGAGATAGCCGAAGAG	3728920	3728946	1	GTTGTTATGTTTTAAGGTAGTGTTTGG	3728785	3728919	TTTGCTAGAGAATATGTTAGCTTGCCTTTTGATGATGGTAAAGTTCCTCACTTGGTCTCTGTAGCTTACAACAACATCTGATGAAATGATGATGATGATGATGATGATGATGATGATGATGATCTTGTTTGTTTT	GTTGTTATGTTTTAAGGTAGTGTTTGGCTTCAGCTTCCCGATATCCGACGGTAGTGTNNNNNNNNTGGGAGATAGCCGAAGAG	3728863	3728907	+	0	46815_0436
3:3852458-3852637/20,25/+	0.931714	3	3852458	3852477	1	GATCATGCATTTGGTAAGTG	3852613	3852637	1	AAGGCGCAGCAACCAGCGGCGTAGA	3852478	3852612	ATATATATATATATATATAGAGAGAGAGAGAGAGAGAGATAAGGTTACCAGTAATAGTCCCAACGAGGACGGACTCTGGTCATGCGGTTATCATCAGATGGATGGTAAGGATGAGCTGCGTGGCGAGTGTTGTGG	AAGGCGCAGCAACCAGCGGCGTAGACTTCAGCTTCCCGATATCCGACGGTAGTGTNNNNNNNNGATCATGCATTTGGTAAGTG	3852496	3852516	+	10	46884_0437_SNP_a
3:3862849-3863028/17,27/+	0.982854	3	3862849	3862865	1	ATGAGAAGAAATGGAAG	3863002	3863028	1	GTGAGTGTGTGGCTCTTCTTCTGGTGG	3862866	3863001	AGAAGCGACGGACCTGGAGATGGAGCTGACGTAGGGGCGATAACGTTAATAACGATGAACACCCTACGAAGAAGAAGCTCCTCCGCAGAATCTCTCTCTCTCTCTGTCTCTCTCTCTCTCTCTCTCTTTTTAATTT	GTGAGTGTGTGGCTCTTCTTCTGGTGGCTTCAGCTTCCCGATATCCGACGGTAGTGTNNNNNNNNATGAGAAGAAATGGAAG	3862956	3862992	+	0	46888_0107
3:3910719-3910898/17,28/+	0.972265	3	3910719	3910735	1	TTGGGGAGACTGGAAAG	3910871	3910898	1	GCCACGGATTCGACTTTCATGGAGTTAG	3910736	3910870	CTGATGATAATGGTATAGAAGGAGGAGAGGAGGAGGAGGAGGATGATGGTGACGACTCGGAATCTGATTTTCTGTGTTTGTTTTGTGATTCTCACTTCGTTTCCTGTGATTTACTCTTCGAACACTGTCGTCTAA	GCCACGGATTCGACTTTCATGGAGTTAGCTTCAGCTTCCCGATATCCGACGGTAGTGTNNNNNNNNTTGGGGAGACTGGAAAG	3910755	3910778	+	0	46915_0438
3:3963231-3963410/17,27/-	0.895651	3	3963394	3963410	1	GTTTTGGATCCAAGTGC	3963231	3963257	1	GTTTTGGTCTTAGATGTTTGCGTTTAC	3963258	3963393	TCATATATACAAAGAACTACTATACTATATATATATATATATATATATATATATGTTTTATTGAAAAAATTATAGCTTCTCATATTTAGAAACGAAAGAAAAAAATCAAACAAAAACGCCAAACGCAAAGAAAAAT	GTTTTGGTCTTAGATGTTTGCGTTTACCTTCAGCTTCCCGATATCCGACGGTAGTGTNNNNNNNNGTTTTGGATCCAAGTGC	3963340	3963373	-	0	46941_0439
3:3986809-3986988/16,29/+	0.967456	3	3986809	3986824	1	GGCCAAATTTAGAAGA	3986960	3986988	1	GGGGTCTACGGAAATTCAACATGGAGTAT	3986825	3986959	AAAAGAAAAGAAAAGAGAATTAGAAGGCAAGATATATATATATATATATATATCTTGCGCGGTTGCATGGTTAAGCATCAAGGCACAAAGGGACAACAACGACATTCTATAAAGAAAAAAGACGAAGCATCAAAA	GGGGTCTACGGAAATTCAACATGGAGTATCTTCAGCTTCCCGATATCCGACGGTAGTGTNNNNNNNNGGCCAAATTTAGAAGA	3986856	3986877	+	0	46956_0108
3:4105282-4105461/16,29/+	0.954813	3	4105282	4105297	1	AACACTGGCCTCAACC	4105433	4105461	1	GTGTGACAGGGAGGTGGCACTTGAGTTCC	4105298	4105432	ATGCAGGTATATATATATATATATATATGGACTAAATTTCTTATTGATATAAATACATCATATTTAAAAAAATAAAATAAAAATACATCATATTTTGTTTCAATATATATACTCATAAAACGTAACATATAATAT	GTGTGACAGGGAGGTGGCACTTGAGTTCCCTTCAGCTTCCCGATATCCGACGGTAGTGTNNNNNNNNAACACTGGCCTCAACC	4105305	4105325	+	10	47018_0440_SNP_a
3:4136041-4136220/18,27/-	0.981718	3	4136203	4136220	1	AAGAATTGAGAGACGTAG	4136041	4136067	1	GATGAGGTTGATGATGATGCTCAGGAG	4136068	4136202	CACCTACCTTCTCGCTCTTTATATAACTCCCTTTCTATCTTTCTGAGTGTGTTTCAAGTATCTTCTTGAGACAGCAAAATAAAAGAGAGAGATAGAGAGAGAGAGAGAGAGAGAGAGAGCTTCAATGATAAAGAA	GATGAGGTTGATGATGATGCTCAGGAGCTTCAGCTTCCCGATATCCGACGGTAGTGTNNNNNNNNAAGAATTGAGAGACGTAG	4136084	4136119	-	0	47029_0441
3:4215921-4216100/18,26/+	0.963655	3	4215921	4215938	1	GTGCGGCAGGTGTCGATG	4216075	4216100	1	GGGACATTGTGAAGTGGCGGCGACTT	4215939	4216074	CACGCAGCCATAGGAGGAGGAGGAGGAGGAGAAGGAGGAGGAGATAAAGTATGGTGTTTGAATTTGGAGGAAACAAAAGAAGGAAGAAGGAAAGAGTGATGATTGATGTGTGGAGAAGATGAACGGAGCATATATA	GGGACATTGTGAAGTGGCGGCGACTTCTTCAGCTTCCCGATATCCGACGGTAGTGTNNNNNNNNGTGCGGCAGGTGTCGATG	4215950	4215981	+	0	47059_0442
3:4295585-4295764/19,26/+	0.951483	3	4295585	4295603	1	ACCCAAAGTCAGTAAATCC	4295739	4295764	1	CATGGTAGAACCGTTTCCCTTGTTGC	4295604	4295738	AAATTCAATTGTTATTATATATATATATATATATATATATATATATATATTTAGAAATGAGAGATGTTAAGGTTGACTATTCACCATGGTAACAGACGTAAAACAGGGGTTTCCCTCCTCTGGTCGAATCTTCAC	CATGGTAGAACCGTTTCCCTTGTTGCCTTCAGCTTCCCGATATCCGACGGTAGTGTNNNNNNNNACCCAAAGTCAGTAAATCC	4295616	4295653	+	0	47105_0443
3:4498016-4498195/18,27/+	0.857966	3	4498016	4498033	1	CATACACCTTTGTACTTC	4498169	4498195	1	TTTTTGTCTCCAAACTCCATCATGTTC	4498034	4498168	AAAAAAAAAATATATATATATATATATATATACGGTCAACAAAAAGGTTTTGTGATTCTGTCCTTATTTGCCTTGTGAAGGAATACGACAAAATAGTTGGCATGTGTGCTATCGTCTTCCACACGTGTGAATCAT	TTTTTGTCTCCAAACTCCATCATGTTCCTTCAGCTTCCCGATATCCGACGGTAGTGTNNNNNNNNCATACACCTTTGTACTTC	4498043	4498065	+	0	47205_0444
3:4553886-4554065/17,26/+	0.981113	3	4553886	4553902	1	GAACCCAAAACAAAAAA	4554040	4554065	1	GATCAACGTGCAAAAGATGGGAGGCT	4553903	4554039	CACCTAATCACAGTCCTTGGTTTTTCTGAAGTTTAGAGAAATGACGACGACGACGACGACGACGATGTCAACTCTTCCAATGGTTTTGGTAGACGAGATTCTCTCTAGGGTTCCCATTACATCTCTTAGATCACTAA	GATCAACGTGCAAAAGATGGGAGGCTCTTCAGCTTCCCGATATCCGACGGTAGTGTNNNNNNNNGAACCCAAAACAAAAAA	4553945	4553967	+	0	47236_0445
3:4608243-4608422/16,29/+	0.979294	3	4608243	4608258	1	TGGCCTCGTGTAGAGA	4608394	4608422	1	TCTTTGTCTGTCTCTGTCCGAAACTCAGG	4608259	4608393	AAGAACCTAGCTAGTGTTCATGCAATTTGCATCTGAGGAATATATGCTTAGAAAGAGAGAGAGAGAGAGAGAGAGAGAGAGAGAGAGAGAGAGAGATATCAAACCAGAGGAAAAGAGTGACAGAGAAAGTGGTCA	TCTTTGTCTGTCTCTGTCCGAAACTCAGGCTTCAGCTTCCCGATATCCGACGGTAGTGTNNNNNNNNTGGCCTCGTGTAGAGA	4608308	4608354	+	0	47261_0446
3:4615565-4615744/16,29/-	0.793445	3	4615729	4615744	1	TGCGTGATTTGTTGGT	4615565	4615593	1	CAAGTTTTGTATAAAAAGGAAAGGATACA	4615594	4615728	TGTGAACTTGTGATTTTGTTAGGAGACAAATTAATATATAGCACAACTGTTGGGATCACCAAAATAAAAAAATAAAAAAATACACATTAATATTTGATTATCTTTTTCCAACTGCTATATATATATATATATATA	CAAGTTTTGTATAAAAAGGAAAGGATACACTTCAGCTTCCCGATATCCGACGGTAGTGTNNNNNNNNTGCGTGATTTGTTGGT	4615594	4615613	-	0	47276_0447
3:4995549-4995728/16,27/+	0.982466	3	4995549	4995564	1	AGATGCGTGGGTGTAT	4995702	4995728	1	GCAGCAGAAGGATGTGACATGTTCACG	4995565	4995701	AAAAACCAGCTGCGTATTTGAATATCTCTCTCTCTCTTGTCTGTGTTGAAATGGGTTCAAAGGATAACGCCATTTCTAATGACTCTGCATTAGTTTTATCGCTTCTTCTTCTTCTTCTTCTTCCCCTGCTTCACGAA	GCAGCAGAAGGATGTGACATGTTCACGCTTCAGCTTCCCGATATCCGACGGTAGTGTNNNNNNNNAGATGCGTGGGTGTAT	4995666	4995687	+	0	47550_0449
3:5050692-5050871/17,28/-	0.971549	3	5050855	5050871	1	CCAAAACGAGATATATC	5050692	5050719	1	GGGGATTTACCTGCCAACAATCTGAGCT	5050720	5050854	ATGTTACAGCTCCAAAAATGATCTAAGTAAACACACAGATCCGTCATACACAGTAGTGGATTTCTCACTTATTTAACCTAAAATCCCTAGAAGAACATACACAGAGAGAGAGAGAGAGAGAGAGAGTTTTGAATT	GGGGATTTACCTGCCAACAATCTGAGCTCTTCAGCTTCCCGATATCCGACGGTAGTGTNNNNNNNNCCAAAACGAGATATATC	5050729	5050752	-	0	47571_0450
3:5081909-5082088/20,25/-	0.935516	3	5082069	5082088	1	GAAACAAATGAATAGATCGG	5081909	5081933	1	GTAGTAACCATAGCCATTGGAGAGA	5081934	5082068	TTGATGAACCACTGTTGTTGTTGCTACTACTGTTAATACTTGAAGACCGGTGGGGTCTCTCAGTTTCCGCCATTTTTTTTTCTTTTTTACAGTGAGAAGAAGGAGAAGAAGAAGAAGAAGAAGAAGAAGAGTGTA	GTAGTAACCATAGCCATTGGAGAGACTTCAGCTTCCCGATATCCGACGGTAGTGTNNNNNNNNGAAACAAATGAATAGATCGG	5081939	5081974	-	0	47587_0451
3:5083092-5083271/17,28/+	0.971509	3	5083092	5083108	1	AGACTACTGTGGAAACA	5083244	5083271	1	GCTTCGAAAATTCTGGATTCGTTTGAGG	5083109	5083243	GAAGAAGTTTCAGTAGCAGTTGCAGAAGCAGAAGCAGAAGCAGAAGCAGAAGCTCCTTTGCCTTCAAATCCAGCTACAGAGGAAGAAGAAAGAGTCAAAGTTGTGGAAGATTCGATTGTTGAAGAAGAACAAGAA	GCTTCGAAAATTCTGGATTCGTTTGAGGCTTCAGCTTCCCGATATCCGACGGTAGTGTNNNNNNNNAGACTACTGTGGAAACA	5083119	5083161	+	0	47589_0452
3:5086700-5086879/20,25/+	0.979423	3	5086700	5086719	1	GGAATGTTCTGTTTCGTTGG	5086855	5086879	1	CTGAGTTCTCTGCAAACTCCCTCCC	5086720	5086854	AGTAAATCCAGAAGAAGAAGAAGAAGAAGAGTTAGCGATGGCTTCACGGATCAAAAATCCCATTCTTGAATCATCAATCTCTTGATCTTGAAACTCATTTACATCGTCTTCTCTTCCTAAGTAACTAGGCAAAGT	CTGAGTTCTCTGCAAACTCCCTCCCCTTCAGCTTCCCGATATCCGACGGTAGTGTNNNNNNNNGGAATGTTCTGTTTCGTTGG	5086729	5086749	+	0	47591_0453
3:5220116-5220295/18,27/-	0.978876	3	5220278	5220295	1	CTTTGGTTTTCAGCGCCT	5220116	5220142	1	CCCCCAAACTCATCTCTCTCTCTTTGC	5220143	5220277	TACAAAGTGCAAAGGTCCACAAACCAAAAATTAAAACAGAGAGCTGAACCCAAAAGAAAAAAAAACCGAAACAAAAAAAAGTTCTCTCTCTCTCTCTCTCTCCATTGATTTCTTCTACACAGACATCTCTACGAA	CCCCCAAACTCATCTCTCTCTCTTTGCCTTCAGCTTCCCGATATCCGACGGTAGTGTNNNNNNNNCTTTGGTTTTCAGCGCCT	5220176	5220195	-	0	47664_0455
3:5247751-5247930/17,28/+	0.896336	3	5247751	5247767	1	CCCTAAAACTTTCCTCA	5247903	5247930	1	GAGCAGCAATCTATTAGTACTTGAATTG	5247768	5247902	AAAAATATCTTTACTTCAAGAATTCAATATCTATTTGAGAAAATACAACTCAGGTTTACTTCACAACCATGTTAACATTAACAACAACAACAACAACAACAACAACAACAACAACAACAAAAAGTGAAAACAAAA	GAGCAGCAATCTATTAGTACTTGAATTGCTTCAGCTTCCCGATATCCGACGGTAGTGTNNNNNNNNCCCTAAAACTTTCCTCA	5247847	5247887	+	0	47689_0109
3:5512983-5513162/16,29/+	0.974064	3	5512983	5512998	1	ACATGTGCTTCCAAAG	5513134	5513162	1	GTTCTGTTTTGTCCCCTGTTTTTGACTGT	5512999	5513133	ATTTTACCTTACTTCAAAACTCTATTCAGAAACCAAGTGGTTGAAGAAGAAGAAGAAGAAGAAGAGACTGATGATGATAGCTTAATACGTGACAAAGTCCCAAGCTTTTTCATCAATTAGTATATAGATTAGAAT	GTTCTGTTTTGTCCCCTGTTTTTGACTGTCTTCAGCTTCCCGATATCCGACGGTAGTGTNNNNNNNNACATGTGCTTCCAAAG	5513041	5513063	+	0	47847_0457
3:5572891-5573070/16,28/+	0.977273	3	5572891	5572906	4	GTGGTTGTTGGAGATG	5573043	5573070	2	GTTTGAGATTGATGCGGATGACTACATC	5572907	5573042	AACATGGAAAGAAGACAGAGCTAGGAGTTGAAGAGGTACAAAAATAGATAATTCTATGTTGTGATTCGTCAAAAGGATATATATATATATATATTTATATGGGTAACCTCACTCAAAATTATTTGGTTTCTTTGCA	GTTTGAGATTGATGCGGATGACTACATCCTTCAGCTTCCCGATATCCGACGGTAGTGTNNNNNNNNGTGGTTGTTGGAGATG	5572983	5573006	+	0	47875_0459
3:5587467-5587646/16,29/-	0.978215	3	5587631	5587646	6	AACAGAACAAGAAAAA	5587467	5587495	1	GCACTTACTTTTCCATGAAACCCGACGAT	5587496	5587630	TTAGAAAACTTAAAACTTAATGAAGATATCACACGTGACAAACTTGGTGGTATAGAAGAGACATATATATATATATATATATGTGATGATCAGTTGGTGACAGGAAGGATATGGACTCCAAACTGATGAAGCACC	GCACTTACTTTTCCATGAAACCCGACGATCTTCAGCTTCCCGATATCCGACGGTAGTGTNNNNNNNNAACAGAACAAGAAAAA	5587549	5587568	-	0	47883_0460
3:5600116-5600295/18,26/+	0.957342	3	5600116	5600133	1	CATGCTTTTTGCAGGTTT	5600270	5600295	1	GCAAGTTCTAGTGCTGTTGCAACGAG	5600134	5600269	ATGAAATGTCTCTGTTTCGAAAGTTCTTATTTTTACAATGTTAATTGAATCAAGAGATTAATGATGCTTAGGATGTGTGTGTGTGTGTGTGTGTTTATAGGGCATTCTAAACCACAATTTTCGAGCTTCTCGTTAT	GCAAGTTCTAGTGCTGTTGCAACGAGCTTCAGCTTCCCGATATCCGACGGTAGTGTNNNNNNNNCATGCTTTTTGCAGGTTT	5600207	5600227	+	0	47902_0461
3:5756259-5756438/19,26/+	0.981018	3	5756259	5756277	2	CATGATCTTAGAGAGGATG	5756413	5756438	1	GCTCCAATGATGGGTTTATTTGTGGT	5756278	5756412	CTTAGGACTTGTCTTTACGAAGGTTCGTATCCAAAAACCAAGATCTTCTCTTTTCATTTTTTTTTTTTTTTTTTTGTTCGTTTAATCTCACGAGAGAGAGAGAGAGAGAGAGAGAAAGAGAGTTCATGGTCTCTT	GCTCCAATGATGGGTTTATTTGTGGTCTTCAGCTTCCCGATATCCGACGGTAGTGTNNNNNNNNCATGATCTTAGAGAGGATG	5756369	5756399	+	0	47995_0462
3:5778696-5778875/18,27/-	0.957485	3	5778858	5778875	1	GTCCGTTGGTCTTTCCTG	5778696	5778722	1	GAACCATTGGTAAACTATCGGTTCCGT	5778723	5778857	TATCATTTATTTACAAAAGAAAAATAAATTAAACATTTATTAAGTTCCCCCCGTAAAAAAAAAATATATATATATATATATATATAACACATGCATCATAATTGGTATGTCCGTAGGTGTTTCCTTATCATAACT	GAACCATTGGTAAACTATCGGTTCCGTCTTCAGCTTCCCGATATCCGACGGTAGTGTNNNNNNNNGTCCGTTGGTCTTTCCTG	5778772	5778794	-	0	48004_0463
3:5803735-5803914/17,28/+	0.980208	3	5803735	5803751	1	AGGTATGCAAGATCAGA	5803887	5803914	1	AACGGTCTCCCAGAGCTGCATCTCGCCT	5803752	5803886	CAAAACCGGAAAATCATAAGTTAAATCATCAGCGATCACACCCAATTTCTATATCACGTTTCCAGGAAAACAATATAAAGGTGAAAAGGAATTTGAGAGAGAGAGAGAGAGAGAGATTAAGAAGGTACGTGATCC	AACGGTCTCCCAGAGCTGCATCTCGCCTCTTCAGCTTCCCGATATCCGACGGTAGTGTNNNNNNNNAGGTATGCAAGATCAGA	5803846	5803867	+	0	48025_0464
3:5852273-5852452/16,28/+	0.970003	3	5852273	5852288	1	GACAGTGAAGTGAAGG	5852425	5852452	1	CGAGGACGATGAAGAAGGGGTATGAATC	5852289	5852424	AAGCCAAAGACGGAGGAGGTGAAGAAGTTACCGGCGGCGACGGTGAAGGAGAGGCTAATGTAGAAGAGGAAGACGACGAAGCAGAAAATGAAGACGATGATGATGATGATGATGATGATGATGACGACGACGAGGA	CGAGGACGATGAAGAAGGGGTATGAATCCTTCAGCTTCCCGATATCCGACGGTAGTGTNNNNNNNNGACAGTGAAGTGAAGG	5852376	5852412	+	0	48087_0466
3:5876157-5876336/16,28/+	0.962143	3	5876157	5876172	1	GAGTTTAGTGTTTGGC	5876309	5876336	1	GCTGAAGATCCACAAGTTTCTGCTTTTG	5876173	5876308	TACAGGTGATAGTGCCATATATATATATATATAGATATATATTAACTTGTGGAGTAGTGTTACTGACAGAATTGATCTATTTTACCTTTGCTGCTATACAATCGCTTTATGATTGGAAGTGTTTTCTTCCTTTATT	GCTGAAGATCCACAAGTTTCTGCTTTTGCTTCAGCTTCCCGATATCCGACGGTAGTGTNNNNNNNNGAGTTTAGTGTTTGGC	5876189	5876214	+	0	48115_0467
3:5900108-5900287/18,26/+	0.979272	3	5900108	5900125	1	GGGGATCTGAGAAAATAG	5900262	5900287	1	CGAGTCTAGTCTTGTCCTTGGTAGCG	5900126	5900261	TCATAAGTCAAAATTTTGTAGTTATCGCAAGATTTGTTGTTGTTGTTGTTGTTTCCATATCCTAAAACATAACTGTTCTTGAACACATTCTTGATTTGGATCCACCTGGTTTGACCAGTACAAGGGTTCCAAACCA	CGAGTCTAGTCTTGTCCTTGGTAGCGCTTCAGCTTCCCGATATCCGACGGTAGTGTNNNNNNNNGGGGATCTGAGAAAATAG	5900159	5900178	+	0	48125_0468
3:5992683-5992862/16,29/-	0.848754	3	5992847	5992862	20	CTTTCTTCTCTTCTTC	5992683	5992711	1	ATCTAATCGGAAGATTCAAGCGAGAAATC	5992712	5992846	TTCTTCTTCCCAATCTTCCTCGTCTCTTTACCTACACCTATATATATATATATATATATATCTCCTTCCCTCACACACATACCTGCACAGCTACAATAATCTACTTCCCCTCTTTCAATAACGGAATTAATAGTA	ATCTAATCGGAAGATTCAAGCGAGAAATCCTTCAGCTTCCCGATATCCGACGGTAGTGTNNNNNNNNCTTTCTTCTCTTCTTC	5992786	5992860	-	0	48178_0469
3:6055319-6055498/16,29/-	0.885551	3	6055483	6055498	1	TGTTTGGTCAAACTGT	6055319	6055347	1	CTTCTATCGACCACAAAATGAGTATAAAC	6055348	6055482	TTTTACTTTTTACAATTTAGCTGCTAAATTATATTGAAGAAAGATAAACTTGAGACAAGTTGCCGACGAAAAAAAAAGAAAAAAAAGAAGAAGAAGAAGAAGAAGGATAAATGGGCATTTAAAATTGACAAAACT	CTTCTATCGACCACAAAATGAGTATAAACCTTCAGCTTCCCGATATCCGACGGTAGTGTNNNNNNNNTGTTTGGTCAAACTGT	6055378	6055407	-	0	48214_0471
3:6123975-6124154/16,29/+	0.97606	3	6123975	6123990	1	AGATAAGGCTGAGACA	6124126	6124154	1	GGATATTATGTGGTGCTTGTGTCTCTATG	6123991	6124125	AAACCCAGTTTCTCTCCTAAACATGATGATGATGATGATGATATTATGGAGTCTGATGTTGAACTCGACAACTCTGATGTAGTTGAACCAGACAATGAGCCTCCTCAGCCGGTAGGTGTTGAAGTTATCATCTTT	GGATATTATGTGGTGCTTGTGTCTCTATGCTTCAGCTTCCCGATATCCGACGGTAGTGTNNNNNNNNAGATAAGGCTGAGACA	6124013	6124032	+	0	48247_0472
3:6148425-6148604/21,22/+	0.980922	3	6148425	6148445	1	TGGTTGATTGATTTTGAGCCG	6148583	6148604	1	GCTAGGTGTTTGTATGTTTTAG	6148446	6148582	TTTCACTGAAAATTGTGTTTGTTGTAGATTCAAATGTGTGTGTGTGTGTGTGTGTGTCTGCTAGTTTTGTCAAACTCATTTCAAATCGATACTTGTTGAATCTGTTCATTGGAAGGCTCTACTGTTTGATCTCTGTT	GCTAGGTGTTTGTATGTTTTAGCTTCAGCTTCCCGATATCCGACGGTAGTGTNNNNNNNNTGGTTGATTGATTTTGAGCCG	6148480	6148502	+	0	48253_0473
3:6220224-6220403/18,26/-	0.920894	3	6220386	6220403	1	CCGAACCGTATTGTGTAG	6220224	6220249	1	GAATGTCCAACAAACAAACCGGTTCC	6220250	6220385	ATTTTGTATCCATTAGCTCAAGAAATACTTTCAGTTATATATATGTATATATATATATATATGCTTATTTAGGTACAAAATTAAATCCAACATTTAATAAAATGGACTAACATTACCAGTCAATTTTGTATATAAT	GAATGTCCAACAAACAAACCGGTTCCCTTCAGCTTCCCGATATCCGACGGTAGTGTNNNNNNNNCCGAACCGTATTGTGTAG	6220324	6220350	-	0	48295_0474
3:6260621-6260800/19,26/+	0.97001	3	6260621	6260639	1	TGTCCCGATGATGGATACG	6260775	6260800	1	GAGGATCTCTTCCACAAGCAACGTCA	6260640	6260774	ATATAAAGCGAGATCGTTGTCTGGAAATATAGTAACCAATTTAAGCAAAATAATAATGAATCCAAAGTTATATATATATATATATATAAGTGGAAAATTATTATTCTATATAATATCTTACGAGAAAAAAGAGAG	GAGGATCTCTTCCACAAGCAACGTCACTTCAGCTTCCCGATATCCGACGGTAGTGTNNNNNNNNTGTCCCGATGATGGATACG	6260708	6260727	+	0	48310_0475
3:6412977-6413156/16,25/+	0.98121	3	6412977	6412992	2	AGGGTTTTAGGTGTCG	6413132	6413156	1	CGGTGGTATAGGCCGGTTAAGGAAT	6412993	6413131	ACGAAGCCATCTCCGTTTCAGAAGTGAATCAGTCACTATGAAGAAGAAGAAGAAGAAGAAGAGATCCCAATTTTTTATTCTCAATTTTTTTTTATGTTTCCCAGAAAAGTTTCAGAGAAGAGTTAAATGGCGGGAATAA	CGGTGGTATAGGCCGGTTAAGGAATCTTCAGCTTCCCGATATCCGACGGTAGTGTNNNNNNNNAGGGTTTTAGGTGTCG	6413032	6413054	+	0	48412_0478
3:6427337-6427536/16,29/+	0.732402	3	6427337	6427352	1	TGGGGATATAATTCAA	6427508	6427536	1	AATCTCTTCTTAGATCTCTCCGGCAATGG	6427353	6427507	ATATATATATATATATATATATATATATATACACATTAAATATCACAACAATTCATTTGATTAATTAGTAAATTACATTGAAACCAGACCTTATCTTCTCAGACTTAAAACCCGTCTTTGCCGGCGACACTTCTCTACTGAATATTTCAGTAAAT	AATCTCTTCTTAGATCTCTCCGGCAATGGCTTCAGCTTCCCGATATCCGACGGTAGTGTNNNNNNNNTGGGGATATAATTCAA	6427353	6427383	+	0	48418_0079
3:6640010-6640189/18,26/+	0.981137	3	6640010	6640027	1	GCTCGATATTCAGCTTCG	6640164	6640189	1	GCAAGTATGTTAGTGTTTGGCTCTGG	6640028	6640163	TGATGGCACTATTCAGCTCTCCGATCTTGCTATCAACGTTGACTATTTGAATGACAAGGTTCTTCCTTCCCTTCCTGATTCTTCTTCTTCTTCTTCTTTTTATTTCAAATGATGCTATGGAATCCTGGAATTTTGG	GCAAGTATGTTAGTGTTTGGCTCTGGCTTCAGCTTCCCGATATCCGACGGTAGTGTNNNNNNNNGCTCGATATTCAGCTTCG	6640106	6640125	+	0	48568_0480
3:6651139-6651318/16,29/-	0.947825	3	6651303	6651318	3	CGTTTTTGTGTTCTTT	6651139	6651167	1	GCGGATAGTTAGGCGAAATTTTATGTTAT	6651168	6651302	TAGTTCTTCACTGGCTCTTACATTTAGAATTATAAATTTGATAGAATTATTTTAGAGAGAGAGAGAGAGAGAGAGAGGAATTAGAAAAATATGTTCACACTTGCGAGTGCACAATATTGCCGAGATCGTGAAGTA	GCGGATAGTTAGGCGAAATTTTATGTTATCTTCAGCTTCCCGATATCCGACGGTAGTGTNNNNNNNNCGTTTTTGTGTTCTTT	6651226	6651249	-	0	48573_0481
3:6749915-6750094/17,28/+	0.972127	3	6749915	6749931	1	ACTAGCAGACGCAAAGG	6750067	6750094	1	GCTTAGGCGATGAAGAAGCTGATATATC	6749932	6750066	AGTTTATGGTGGTCTTGATGATGAATTTTAGGGTTTATTTGATGAGAGTCAATCTTCAAAACAACGTTGTTGAATCATCATCATCATCATCATCATCATCATCATCATGTATAAAACGTGAAGCTAAACTTATTA	GCTTAGGCGATGAAGAAGCTGATATATCCTTCAGCTTCCCGATATCCGACGGTAGTGTNNNNNNNNACTAGCAGACGCAAAGG	6750005	6750039	+	0	48654_0483
3:6774711-6774890/21,24/+	0.955973	3	6774711	6774731	1	GTTTGTTGTTTTGTTTCTCCT	6774867	6774890	1	CTTGCTTCCTCGCTAGAAATCTCT	6774732	6774866	ACATGAAAAGAATATACAATCCATCTTCTTTATGACTATATATATATATATATATATATGTCTTTACTTAACTCCTCCAAAGTAAAACAGAGACACAAACTGCTTCTATCATGAAAAGCAGGGGAACAAATTTAT	CTTGCTTCCTCGCTAGAAATCTCTCTTCAGCTTCCCGATATCCGACGGTAGTGTNNNNNNNNGTTTGTTGTTTTGTTTCTCCT	6774768	6774790	+	0	48673_0484
3:6980184-6980363/16,27/+	0.980336	3	6980184	6980199	1	AAAGCCAGTGTGAGCG	6980337	6980363	1	GACTTGTGATTTGGGAAGTGATGGGTC	6980200	6980336	TGAAGACTCTCTCTTTCTTTCTTCTTGGATTTTGGGTTTTGATGTCAGACTAAGTTTTTGGTGTCTTGCTTCTCTCTGAAAGATGAGATTTTTTTGAGATTTATTTATTGAGAGAGAGAGAGAGAGAGACCACTTGA	GACTTGTGATTTGGGAAGTGATGGGTCCTTCAGCTTCCCGATATCCGACGGTAGTGTNNNNNNNNAAAGCCAGTGTGAGCG	6980309	6980328	+	0	48779_0485
3:7065379-7065558/17,26/-	0.981885	3	7065542	7065558	1	GGCTCAAGGAGTTGAGG	7065379	7065404	1	GTGGGGAGGTTTTGATGCTGTCTATG	7065405	7065541	AGAAACAGTTTCATGGTGTTGATACCTGAGGAAGAAGAAGAAGAAGAAGAGGAATCGTATCTAGATGAAGATGATGATGACGGAGAAGACAAGTGTTCAAGTGAGTGGAGAGATGTGGTTGCTGAAGGACTTCAATG	GTGGGGAGGTTTTGATGCTGTCTATGCTTCAGCTTCCCGATATCCGACGGTAGTGTNNNNNNNNGGCTCAAGGAGTTGAGG	7065488	7065511	-	0	48813_0486
3:7292965-7293144/21,23/+	0.973	3	7292965	7292985	1	GTAGATAAATACAAGCTTTAA	7293122	7293144	1	TTAGTCTTATATTCCCCATGTGC	7292986	7293121	AAAACAAAAACAAAAACAACAACAAAAACAAAAACAAAAACAAAAACAAAAGCAAAAGCAAAAGCAAATGCTTGTATGAGTCATAACAAACTGAAGACACACAAAAAAGAAAAAAAGAAAAAAAACAAACAAAAAA	TTAGTCTTATATTCCCCATGTGCCTTCAGCTTCCCGATATCCGACGGTAGTGTNNNNNNNNGTAGATAAATACAAGCTTTAA	7292985	7293053	+	0	48964_0487
3:7300419-7300598/16,28/-	0.953392	3	7300583	7300598	2	CAAAGATTGGAGAATA	7300419	7300446	1	GTGAGAGATGAATCTTGAGGAAGACCAG	7300447	7300582	TGTATTTATATAGGTAGATGTATTCTTCAGATTTATATATCTATCTCTCTTTCTCTTTCTCTTTCTCTTTCTCGTTCTCGTTCTCTCAAAAGCTATAAACTCTAGCTTTAGGGTTTTAACAAAGGAGAAGATATTT	GTGAGAGATGAATCTTGAGGAAGACCAGCTTCAGCTTCCCGATATCCGACGGTAGTGTNNNNNNNNCAAAGATTGGAGAATA	7300497	7300537	-	0	48969_0488
3:7325458-7325637/20,25/+	0.816248	3	7325458	7325477	1	GCGGCTTTTCTTATCATTTT	7325613	7325637	1	GCAATCAAAAGTGTACATGAAGAAG	7325478	7325612	CTCTCTCTCTCTCTCTCTCTTTTTTTCACAAAAATTAAAAACACATATTAATCACATCATCGATAATACAGAATTGATTATTCTTTTTTCAACAGAATAAAGAAATGATTCTTAACTATCTATACAAGGGTCAAA	GCAATCAAAAGTGTACATGAAGAAGCTTCAGCTTCCCGATATCCGACGGTAGTGTNNNNNNNNGCGGCTTTTCTTATCATTTT	7325477	7325497	+	10	48996_0489_SNP_a
3:7447551-7447730/16,29/-	0.974988	3	7447715	7447730	1	GAAGAACCTAGAATCT	7447551	7447579	1	GCTGATGTTTACATGCATGATGCATGCTC	7447580	7447714	GACCTGGACAGTTGAGAGTTACATTCCTAATCACACTAAAACATCAAGGCAATTTGACGGATACTGAACACAAAACCATTGGGAGAGAGAGAGAGAGAGAGAGAGAGAGAACGAGAAGCAGAAACAAGGTGAATA	GCTGATGTTTACATGCATGATGCATGCTCCTTCAGCTTCCCGATATCCGACGGTAGTGTNNNNNNNNGAAGAACCTAGAATCT	7447605	7447632	-	0	49050_0490
3:7464878-7465057/22,21/+	0.987146	3	7464878	7464899	1	AAACAAAACAACAACAACAAAA	7465037	7465057	1	GTATCGATGGGTCTACGTGTC	7464900	7465036	ATCAATAAAAATAATAGGTCAATAATTGTTGATAATTAATAAGAAAAATGAGTGTGGAGGAAAAAAACGAGGTCCATTCATTCGAGAGAGAGAGAGAGAGAGAGTATAACAAAAATGACCATGAAAGCAACGTAAAG	GTATCGATGGGTCTACGTGTCCTTCAGCTTCCCGATATCCGACGGTAGTGTNNNNNNNNAAACAAAACAACAACAACAAAA	7464983	7465003	+	10	49057_0491_SNP_a
3:7542849-7543028/16,27/+	0.936078	3	7542849	7542864	1	GGTGATACCATTGAGG	7543002	7543028	1	GCATAGGGCAGTAACAAACAGGGAAAA	7542865	7543001	TATTAATTTTACCATATCAATTTCCTATAATTATTATATCACAATTTAAATGAAGTATTTTAATTTGTGTAAATTATATATATATATATATATATATATATGTAGGTGCTAAGTAATGGGAAATACAAGAGTGTAGA	GCATAGGGCAGTAACAAACAGGGAAAACTTCAGCTTCCCGATATCCGACGGTAGTGTNNNNNNNNGGTGATACCATTGAGG	7542939	7542965	+	0	49114_0492
3:7567534-7567713/17,28/-	0.980648	3	7567697	7567713	1	ACAAACTCCGACAACGA	7567534	7567561	1	CGTTAGGGTTCGCGGGGAGCGTGAACTA	7567562	7567696	TAGTCCAATTCGCCGGGTTTGATTTCTCTAGAGGCGATTTCAATGTAGATCCAAAAGTGAAGAAGAAGAAGAAGAAGAAGAAGAAGAAAGCCGACACGGGGAATTTTAGGCGCGCAAAAGACAGTAAAGTGGTCT	CGTTAGGGTTCGCGGGGAGCGTGAACTACTTCAGCTTCCCGATATCCGACGGTAGTGTNNNNNNNNACAAACTCCGACAACGA	7567609	7567638	-	0	49123_0493
3:7644722-7644901/22,23/+	0.960853	3	7644722	7644743	1	CTCTTGCTTTCTCGCGCTCTTC	7644879	7644901	1	CGGATTCTGATTTGGTTTCTTTG	7644744	7644878	CGTCTCCGACTGTTTCTCGTCCTTCTCCTTCTCCGATCCCCGCCGTCGATGTCGTCGTCGGTGGTGGTGGTGGTGGTGGTGAGTTTGTTCGTCGTTCGTCGGTTGTTTACGATAATGATAACAGTCATCGGAGAT	CGGATTCTGATTTGGTTTCTTTGCTTCAGCTTCCCGATATCCGACGGTAGTGTNNNNNNNNCTCTTGCTTTCTCGCGCTCTTC	7644803	7644824	+	0	49152_0494
3:7649331-7649510/17,28/+	0.982773	3	7649331	7649347	1	GAAACGGTTTACGATAG	7649483	7649510	1	TTATGCGTCGTCCCTATCTCCATGTTGG	7649348	7649482	GGAAATATTAGAGGCATGGGGGATCATCAAATCCAAATACAAGAAGGTGGTGAACAAAAAGTGACGCTGATGAGAAATCTCATTGACGGAAACAACAACAACAACAACAACAATATGGATTTGAGGAGTAGAGGA	TTATGCGTCGTCCCTATCTCCATGTTGGCTTCAGCTTCCCGATATCCGACGGTAGTGTNNNNNNNNGAAACGGTTTACGATAG	7649438	7649460	+	0	49157_0495
[truncated: 1,039 more rows]
