# Supplementary material for: Massive variation of short tandem repeats with functional consequences across strains of Arabidopsis thaliana
Source: HighWire-hosted journal article supplement (doi:10.1101/gr.231753.117), 2018-07-03
Supplement: Supplemental_File_S4.zip [file 113736_homo_021417.xlsx]

## Sheet: 113736_homo_021417.csv
seedling_number	genotype_label	tray_number	tray_row	tray_col	treatment	RLN	DTF	notes
1	1	1	1	1		19	45
2	2	1	1	2		11	36
3	1	1	1	3		14	36
4	2	1	1	4		11	30
5	1	1	1	5		15	39
6	2	1	1	6		10	30
7	1	1	1	7		11	34
8	2	1	1	8		14	33
9	1	1	1	9		14	32
10	2	1	2	1		13	40	small
11	1	1	2	2		17	49	sick
12	2	1	2	3		11	37	sick
13	1	1	2	4		14	33
14	2	1	2	5		NA	NA
15	1	1	2	6		NA	NA
16	2	1	2	7		NA	NA
17	1	1	2	8		NA	NA
18	2	1	2	9		13	32	small
19	1	1	3	1		11	38	sick
20	2	1	3	2		14	50	small
21	1	1	3	3		13	43
22	2	1	3	4		NA	NA
23	1	1	3	5		13	35
24	2	1	3	6		13	32
25	1	1	3	7		NA	NA
26	2	1	3	8		9	34	very very sick
27	1	1	3	9		12	42
28	2	1	4	1		14	33
29	1	1	4	2		14	33
30	2	1	4	3		14	45
31	1	1	4	4		12	40
32	2	1	4	5		14	39
33	1	1	4	6		15	47
34	2	1	4	7		NA	NA
35	1	1	4	8		15	37
36	2	1	4	9		14	31

## Sheet: mapping
mapping of randomized keys to genotypes:
1	Col
2	salk_113736_homo
