# Supplementary material for: Massive variation of short tandem repeats with functional consequences across strains of Arabidopsis thaliana
Source: HighWire-hosted journal article supplement (doi:10.1101/gr.231753.117), 2018-07-03
Supplement: Supplemental_File_S4.zip [file bur0_comparison_122916.pdf › Ath_STRs/validations/bur0_comparison_122916.pdf]

|                 | MIPSTR call | MIPSTR no call |
|-----------------|-------------|----------------|
| de novo call    | 2           | 4              |
| de novo no call | 828         | 1212           |
