# Supplementary material for: Massive variation of short tandem repeats with functional consequences across strains of Arabidopsis thaliana
Source: HighWire-hosted journal article supplement (doi:10.1101/gr.231753.117), 2018-07-03
Supplement: Supplemental_File_S4.zip [file bur0_comparison_122916.xlsx]

## Sheet: Sheet1
	MIPSTR call	MIPSTR no call
de novo call	2	4
de novo no call	828	1212
