# Supplementary material for: Massive variation of short tandem repeats with functional consequences across strains of Arabidopsis thaliana
Source: HighWire-hosted journal article supplement (doi:10.1101/gr.231753.117), 2018-07-03
Supplement: Supplemental_File_S4.zip [file cmt2_stops.xlsx]

## Sheet: Sheet1
Accession	stop_allele
Ag-0	0
An-1	0
Bay-0	0
Bil-5	0
Bil-7	0
Bor-1	0
Bor-4	0
Br-0	0
Bur-0	0
CIBC-17	0
CIBC-5	0
Col-0	0
Ct-1	1
Cvi-0	0
Eden-1	0
Eden-2	0
Edi-0	0
Ei-2	0
Est-1	1
Fab-2	0
Fab-4	0
Fei-0	0
Ga-0	0
Got-22	0
Got-7	0
Gu-0	0
Kz-9	1
Ler-1	0
LL-0	0
Lp2-2	0
Lp2-6	0
Ms-0	1
Mt-0	1
Mz-0	0
N13	1
NFA-10	0
NFA-8	1
Nd-1	1
Nok-3	0
Oy-0	0
PNA-10	0
PNA-17	0
Pro-0	0
Pu2-7	0
Ra-0	0
Ren-1	0
Ren-11	0
Rmx-A02	0
Rmx-A180	0
RRs-10	0
RRS-7	0
Se-0	0
Sha	0
Sorbo	1
Spr1-2	1
Spr1-6	0
Sq-1	0
Sq-8	0
Tamm-27	0
Tamm-2	0
Ts-1	0
Ts-5	0
Tsu-1	0
Ull2-3	0
Ull2-5	0
Uod-1	0
Uod-7	0
Van-0	0
Var2-1	0
Var2-6	0
Wa-1	0
Wei-0	0
Ws-0	0
Ws-2	0
Wt-5	0
Yo-0	0
Zdr-1	0
