# Supplementary material for: Massive variation of short tandem repeats with functional consequences across strains of Arabidopsis thaliana
Source: HighWire-hosted journal article supplement (doi:10.1101/gr.231753.117), 2018-07-03
Supplement: Supplemental_File_S4.zip [file colxnd_f2s_hcdark_122316.xlsx]

## Sheet: Sheet1
seedling_number	genotype_label	plate_number	plate_position	hypocotyl_4d	root_4d	note		num_short:	13
1	1	1	1	14.357	9.754			num_long:	23
2	1	1	2	13.594	7.37
3	1	1	3	16.298	13.37	long
4	1	1	4	14.249	10.655
5	1	1	5	12.229	7.586
6	1	1	6	12.023	7.526
7	1	1	7	13.244	15.611
8	1	1	8	15.14	11.093
9	1	1	9	0.128	0.111	nogerm
10	1	1	10	0.128	0.111	nogerm
11	1	1	11	13.379	11.47
12	1	1	12	9.035	4.954	short
13	1	1	13	15.94	9.949
14	1	1	14	13.177	11.825
15	1	1	15	10.525	8.023	short
16	1	1	16	16.211	15.614	long
17	1	1	17	14.352	10.402
18	1	1	18	14.577	10.304
19	1	1	19	12.32	8.302
20	1	1	20	12.455	10.849
21	1	1	21	14.624	14.186
22	1	1	22	0.074	0.148	nogerm
23	1	1	23	14.528	11.847
24	1	1	24	15.527	7.909
25	1	1	25	12.302	13.116
26	1	1	26	13.947	10.547
27	1	1	27	15.663	13.318
28	1	1	28	11.281	7.769
29	1	1	29	12.811	14.199
30	1	1	30	12.271	11.046
31	1	2	1	8.91177	12.224	short
32	1	2	2	16.2102	9.719	long
33	1	2	3	13.382	9.186
34	1	2	4	17.59	14.22	long
35	1	2	5	14.483	10.985
36	1	2	6	15.1388	11.195
37	1	2	7	17.4178	10.131	long
38	1	2	8	15.8046	9.807
39	1	2	9	14.9039	9.544
40	1	2	10	15.0203	9.212
41	1	2	11	0.192	0.185	nogerm
42	1	2	12	15.07	9.983
43	1	2	13	15.969	12.885
44	1	2	14	15.055	11.966
45	1	2	15	15.411	12.166
46	1	2	16	13.542	10.057
47	1	2	17	15.016	6.81
48	1	2	18	9.617	10.141	short
49	1	2	19	15.661	12.037
50	1	2	20	13.479	9.006
51	1	2	21	9.861	5.991	short
52	1	2	22	15.582	15.534
53	1	2	23	15.614	13.033
54	1	2	24	15.456	12.65
55	1	2	25	13.054	4.536
56	1	2	26	16.528	14.763	long
57	1	2	27	11.215	9.733
58	1	2	28	11.852	7.074
59	1	2	29	15.257	13.199
60	1	2	30	4.305	2.663	short
