# Supplementary material for: Massive variation of short tandem repeats with functional consequences across strains of Arabidopsis thaliana
Source: HighWire-hosted journal article supplement (doi:10.1101/gr.231753.117), 2018-07-03
Supplement: Supplemental_File_S4.zip [file expansion_training_081616_mipstr_analysis.xlsx]

## Sheet: svr_analyis
trainsize	NC	COD	NC_cor	COD_cor
nc/4	2.256	2.386	0.686	0.642
nc/2	3.168	3.616	0.723557	0.640365
nc/3	2.46453	2.70516	0.702222	0.641333
nc/1.5	4.08869	4.82779	0.738893	0.634768
nc/5	2.11577	2.20608	0.674184	0.64405
whole/10	2.6986	2.53245	0.652582	0.681422

## Sheet: expanded_genos
STR	Mr-0	Omo2-1	Pu2-7	Ren-11	Rrs-7	Ts-5	Van-0	Ag-0	Br-0	Bil-5	Col	Bil-7	Bor-1	Bor-4	Sq-1	Ull2-3	C24	CIBC-5	N13	Ct-1	Est-1	Bur-0	Eden-2	Edi-0	Ei-2	Fab-2	Fab-4	Got-7	Got-22	Gu-0	Gy-0	HR-5	CIBC-17	Kas-2	Knox-18	Kz-1	Kz-9	Ler-1	LL-0	Lov-1	Lov-5	Sha	Lp2-2	Ga-0	Lz-0	Ms-0	Mt-0	Mz-0	NFA-8
93552	NA	10.7	10.7	NA	16.7	11.7	NA	NA	NA	14.7	10.7	14.7	NA	NA	11.7	10.7	10.7	20.7	21.7	15.7	10.7	NA	15.7	10.7	NA	NA	NA	NA	20.7	NA	20.7	10.7	18.7	NA	16.7	NA	16.7	14.7	14.7	14.7	14.7	10.7	10.7	16.7	10.7	15.7	10.7	10.7	14.7
26713	10.7	10.7	15.7	9.7	10.7	19.7	9.7	10.7	11.7	9.7	9.7	9.7	NA	13.7	11.7	10.7	11.7	11.7	10.7	9.7	9.7	9.7	9.7	9.7	11.7	9.7	9.7	9.7	9.7	12.7	9.7	10.7	9.7	9.7	9.7	9.7	9.7	10.7	10.7	12.7	12.7	9.7	9.7	11.7	9.7	9.7	12.7	9.7	11.7
94	9.7	9.7	9.7	9.7	10.7	9.7	9.7	9.7	9.7	9.7	9.7	9.7	9.7	9.7	9.7	9.7	9.7	9.7	9.7	9.7	9.7	9.7	9.7	6.7	9.7	6.7	6.7	9.7	9.7	9.7	9.7	9.7	9.7	6.7	9.7	9.7	19.7	9.7	9.7	6.7	6.7	6.7	9.7	9.7	9.7	9.7	9.7	9.7	9.7
81937	12.7	8.7	8.7	8.7	8.7	10.7	9.7	8.7	8.7	8.7	10.7	8.7	8.7	16.7	8.7	8.7	8.7	8.7	7.7	8.7	8.7	8.7	8.7	8.7	14.7	8.7	8.7	9.7	9.7	8.7	8.7	8.7	9.7	9.7	8.7	9.7	7.7	8.7	8.7	8.7	8.7	7.7	8.7	8.7	8.7	7.7	15.7	8.7	8.7
18846	6.7	7.7	7.7	7.7	9.7	9.7	10.7	7.7	13.7	8.7	9.7	8.7	7.7	7.7	7.7	12.7	7.7	7.7	8.7	8.7	8.7	7.7	8.7	9.7	7.7	8.7	8.7	9.7	9.7	8.7	7.7	7.7	7.7	7.7	7.7	7.7	7.7	8.7	8.7	7.7	7.7	7.7	7.7	9.7	13.7	7.7	7.7	15.7	8.7
84729	11.5	12.5	13.5	12.5	13.5	13.5	25.5	13.5	17.5	15.5	10.5	15.5	13.5	13.5	13.5	12.5	12.5	13.5	13.5	12.5	12.5	14.5	15.5	12.5	12.5	14.5	14.5	8.5	8.5	12.5	13.5	13.5	12.5	12.5	12.5	12.5	13.5	25.5	25.5	15.5	15.5	12.5	13.5	12.5	12.5	13.5	12.5	10.5	12.5
81421	8.5	11.5	12.5	17.5	11.5	11.5	18.5	10.5	20.5	9.5	15.5	9.5	10.5	17.5	18.5	12.5	10.5	11.5	10.5	12.5	21.5	13.5	9.5	NA	11.5	9.5	9.5	13.5	13.5	18.5	11.5	11.5	11.5	10.5	10.5	12.5	12.5	18.5	18.5	9.5	9.5	10.5	21.5	13.5	10.5	10.5	NA	18.5	18.5
44082	8.7	6.7	6.7	8.7	6.7	6.7	6.7	6.7	6.7	9.7	6.7	9.7	6.7	6.7	6.7	6.7	6.7	6.7	6.7	6.7	8.7	6.7	6.7	8.7	6.7	6.7	6.7	6.7	6.7	6.7	8.7	6.7	6.7	8.7	6.7	8.7	8.7	6.7	6.7	6.7	6.7	5.7	6.7	8.7	8.7	6.7	6.7	6.7	8.7
5573	9.5	8.5	8.5	14.5	10.5	9.5	8.5	8.5	15.5	8.5	16.5	8.5	8.5	9.5	9.5	NA	21.5	11.5	18.5	8.5	13.5	13.5	NA	11.5	NA	12.5	12.5	15.5	15.5	8.5	8.5	12.5	NA	10.5	13.5	16.5	18.5	9.5	9.5	10.5	10.5	8.5	16.5	8.5	13.5	20.5	9.5	12.5	9.5
96	14.5	10.5	10.5	17.5	10.5	10.5	21.5	16.5	16.5	10.5	11.5	10.5	16.5	10.5	21.5	10.5	12.5	10.5	13.5	10.5	11.5	9.5	10.5	3.5	10.5	13.5	13.5	10.5	10.5	10.5	10.5	16.5	10.5	12.5	10.5	12.5	12.5	10.5	10.5	13.5	13.5	12.5	10.5	10.5	18.5	10.5	10.5	20.5	21.5
22913	14.5	12.5	9.5	12.5	12.5	8.5	8.5	8.5	9.5	8.5	12.5	8.5	8.5	9.5	11.5	8.5	11.5	12.5	9.5	8.5	12.5	12.5	12.5	8.5	12.5	16.5	16.5	8.5	8.5	8.5	11.5	14.5	12.5	16.5	8.5	15.5	9.5	9.5	9.5	8.5	8.5	16.5	8.5	8.5	8.5	15.5	12.5	8.5	8.5
49282	11.3	11.3	12.3	10.3	11.3	15.3	5.3	10.3	10.3	20.3	11.3	20.3	11.3	11.3	10.3	13.3	15.3	10.3	11.3	11.3	12.3	11.3	11.3	10.3	5.3	20.3	12.3	5.3	5.3	5.3	10.3	11.3	13.3	12.3	10.3	12.3	12.3	10.3	10.3	20.3	20.3	12.3	12.3	11.3	10.3	11.3	23.3	12.3	10.3
45105	4.7	4.7	6.7	4.7	9.7	9.7	9.7	9.7	9.7	4.7	9.7	4.7	9.7	4.7	4.7	4.7	9.7	4.7	6.7	9.7	4.7	4.7	4.7	9.7	4.7	4.7	4.7	9.7	9.7	4.7	9.7	4.7	4.7	4.7	4.7	4.7	4.7	9.7	9.7	4.7	4.7	4.7	4.7	9.7	9.7	9.7	9.7	9.7	9.7
2479	NA	5.5	11.5	5.5	9.5	5.5	NA	5.5	11.5	7.5	11.5	7.5	NA	8.5	5.5	NA	NA	5.5	NA	11.5	NA	5.5	5.5	5.5	9.5	7.5	7.5	5.5	5.5	NA	5.5	5.5	5.5	9.5	7.5	14.5	NA	9.5	9.5	7.5	7.5	NA	12.5	11.5	9.5	NA	5.5	10.5	5.5
82078	7.5	8.5	7.5	NA	NA	7.5	7.5	7.5	7.5	7.5	NA	7.5	7.5	15.5	8.5	7.5	7.5	8.5	7.5	7.5	10.5	7.5	7.5	15.5	15.5	13.5	13.5	12.5	12.5	7.5	8.5	7.5	12.5	7.5	7.5	NA	7.5	7.5	7.5	7.5	7.5	7.5	7.5	7.5	7.5	7.5	7.5	7.5	8.5
87126	12	14	15	20	17	NA	12	17	17	14	15	14	NA	14	NA	14	14	NA	9	15	15	14	18	20	14	15	15	14	14	15	24	NA	14	12	22	10	10	NA	NA	16	16	14	14	5	14	15	15	15	NA
42965	17.3	9.3	8.3	8.3	8.3	17.3	10.3	9.3	9.3	8.3	8.3	8.3	9.3	9.3	9.3	17.3	9.3	9.3	9.3	7.3	7.3	8.3	8.3	13.3	10.3	8.3	8.3	18.3	18.3	8.3	18.3	18.3	9.3	14.3	13.3	14.3	7.3	10.3	10.3	9.3	9.3	8.3	7.3	7.3	9.3	9.3	9.3	8.3	19.3
97656	NA	13	15	13	14	13	9	15	13	8	13	8	9	19	16	13	14	14	14	14	13	12	20	16	12	8	8	17	17	8	14	16	15	12	17	13	12	13	13	8	8	8	8	16	13	14	9	14	16
176	9.3	8.3	8.3	9.3	8.3	8.3	17.3	8.3	8.3	15.3	8.3	15.3	8.3	8.3	9.3	8.3	12.3	8.3	8.3	8.3	9.3	8.3	8.3	10.3	6.3	8.3	8.3	9.3	9.3	8.3	8.3	9.3	9.3	9.3	8.3	8.3	9.3	8.3	8.3	8.3	8.3	10.3	8.3	8.3	8.3	9.3	8.3	8.3	9.3
67950	11	NA	11	12	13	11	10	NA	11	11	18	11	NA	NA	20	11	NA	19	12	16	11	11	11	NA	NA	11	10	NA	NA	18	12	19	11	14	NA	11	11	NA	NA	11	11	12	11	NA	11	12	18	NA	20
21427	8.2	8.2	8.2	9.2	6.2	7.2	NA	6.2	8.2	8.2	8.2	8.2	NA	8.2	8.2	8.2	8.2	NA	9.2	9.2	8.2	NA	8.2	8.2	8.2	9.2	8.2	10.2	10.2	8.2	17.2	NA	8.2	8.2	NA	8.2	8.2	8.2	8.2	8.2	8.2	9.2	8.2	NA	NA	6.2	NA	9.2	NA
104257	9	11	13	8	NA	9	NA	10	NA	8	11	8	12	8	8	8	10	NA	12	10	6	8	9	8	9	12	12	8	8	15	7	8	11	10	8	10	10	12	12	8	8	10	8	8	11	10	6	11	8
45622	9	10	13	12	9	9	9	11	9	10	11	10	9	9	9	9	9	9	10	10	9	9	10	9	11	10	9	21	21	11	11	9	11	10	12	11	10	9	9	10	10	10	9	11	11	10	10	11	9
80140	21	9	10	10	10	10	11	10	10	9	10	9	9	9	10	9	11	10	9	11	10	9	9	10	9	9	9	9	9	10	10	10	10	9	10	9	9	10	10	9	9	9	10	10	10	10	9	10	10
39221	5.3	7.3	7.3	4.3	7.3	6.3	6.3	4.3	6.3	9.3	9.3	9.3	4.3	4.3	4.3	6.3	6.3	4.3	7.3	7.3	6.3	4.3	6.3	6.3	6.3	6.3	6.3	6.3	6.3	6.3	4.3	6.3	6.3	7.3	6.3	10.3	6.3	6.3	6.3	6.3	6.3	6.3	4.3	6.3	6.3	7.3	6.3	7.3	4.3
41076	17.7	11.7	10.7	9.7	6.7	12.7	11.7	13.7	13.7	11.7	11.7	11.7	11.7	12.7	13.7	10.7	15.7	9.7	13.7	6.7	11.7	12.7	11.7	6.7	11.7	11.7	11.7	11.7	11.7	10.7	6.7	12.7	11.7	11.7	10.7	12.7	6.7	12.7	12.7	11.7	11.7	11.7	13.7	6.7	6.7	6.7	11.7	11.7	6.7
52814	10.7	11.7	13.7	7.7	12.7	12.7	16.7	16.7	6.7	16.7	9.7	16.7	11.7	10.7	11.7	9.7	10.7	12.7	10.7	11.7	7.7	9.7	24.7	17.7	18.7	10.7	10.7	16.7	16.7	8.7	12.7	12.7	8.7	8.7	10.7	12.7	14.7	12.7	12.7	11.7	11.7	8.7	10.7	20.7	14.7	11.7	11.7	15.7	11.7
60513	NA	NA	13.5	NA	13.5	NA	NA	13.5	NA	NA	12.5	13.5	NA	13.5	NA	13.5	NA	NA	NA	14.5	NA	NA	13.5	12.5	12.5	13.5	NA	NA	NA	NA	NA	NA	13.5	16.5	NA	NA	18.5	NA	NA	NA	NA	12.5	28.5	14.5	13.5	12.5	NA	NA	NA
73612	12.7	11.7	10.7	11.7	10.7	10.7	NA	9.7	11.7	NA	12.7	NA	NA	24.7	11.7	10.7	12.7	11.7	NA	16.7	17.7	NA	NA	NA	12.7	10.7	10.7	NA	NA	10.7	10.7	NA	19.7	NA	NA	11.7	NA	11.7	NA	NA	NA	NA	10.7	7.7	11.7	NA	NA	12.7	12.7
37035	18	12	11	10	9	8	12	12	8	8	8	8	8	8	14	12	8	8	15	8	8	8	7	12	14	7	7	11	11	12	14	14	11	12	9	15	9	8	8	7	7	12	8	8	9	15	12	12	14
48964	21.5	12.5	26.5	11.5	11.5	11.5	11.5	11.5	26.5	26.5	11.5	26.5	7.5	7.5	26.5	21.5	11.5	11.5	NA	9.5	20.5	8.5	7.5	11.5	11.5	11.5	7.5	8.5	8.5	26.5	26.5	26.5	26.5	18.5	8.5	26.5	26.5	19.5	19.5	11.5	11.5	18.5	26.5	9.5	11.5	9.5	11.5	26.5	26.5
75717	9.5	14.5	15.5	15.5	12.5	12.5	12.5	11.5	16.5	NA	22.5	NA	12.5	NA	11.5	NA	18.5	12.5	12.5	17.5	NA	13.5	15.5	17.5	13.5	15.5	15.5	NA	9.5	12.5	9.5	12.5	9.5	NA	15.5	15.5	10.5	12.5	12.5	15.5	15.5	NA	16.5	20.5	12.5	10.5	9.5	18.5	14.5
5442	11.7	10.7	9.7	10.7	11.7	12.7	7.7	21.7	11.7	11.7	10.7	11.7	10.7	10.7	7.7	7.7	10.7	7.7	11.7	12.7	7.7	10.7	22.7	10.7	10.7	10.7	10.7	12.7	12.7	10.7	13.7	7.7	14.7	12.7	10.7	11.7	11.7	12.7	12.7	13.7	13.7	17.7	10.7	12.7	14.7	12.7	14.7	12.7	7.7
43135	7	NA	9	8	NA	NA	NA	14	NA	8	14	8	8	8	NA	NA	11	NA	NA	8	NA	8	8	NA	11	8	8	NA	13	8	17	NA	NA	NA	NA	12	12	11	11	4	4	NA	NA	10	NA	10	13	13	17
80397	14	16	16	20	7	14	22	16	16	17	21	17	23	16	13	8	22	7	25	15	25	29	16	15	14	29	16	NA	NA	28	13	25	24	12	21	19	25	14	14	13	13	29	26	16	16	22	24	23	13
6782	21.3	16.3	25.3	18.3	19.3	12.3	13.3	24.3	14.3	14.3	11.3	14.3	11.3	14.3	11.3	11.3	9.3	17.3	13.3	19.3	22.3	14.3	10.3	15.3	14.3	12.3	12.3	15.3	15.3	11.3	11.3	21.3	14.3	26.3	12.3	13.3	13.3	19.3	19.3	10.3	10.3	13.3	23.3	14.3	17.3	12.3	22.3	17.3	11.3
104231	NA	10.5	12.5	10.5	NA	NA	17.5	24.5	NA	NA	11.5	NA	12.5	13.5	NA	NA	NA	NA	10.5	NA	NA	NA	NA	NA	17.5	NA	NA	NA	NA	NA	NA	NA	10.5	20.5	10.5	12.5	NA	NA	NA	NA	NA	18.5	13.5	NA	NA	NA	NA	10.5	NA
37703	8.3	5.3	5.3	5.3	5.3	8.3	5.3	7.3	5.3	5.3	8.3	5.3	5.3	5.3	5.3	5.3	8.3	5.3	8.3	8.3	5.3	6.3	8.3	5.3	5.3	5.3	5.3	5.3	5.3	5.3	5.3	5.3	5.3	7.3	8.3	8.3	8.3	5.3	5.3	8.3	8.3	8.3	5.3	6.3	5.3	8.3	8.3	8.3	5.3
25811	9.7	11.7	9.7	9.7	9.7	9.7	9.7	9.7	10.7	11.7	16.7	11.7	9.7	10.7	9.7	9.7	9.7	9.7	10.7	10.7	9.7	10.7	10.7	11.7	9.7	20.7	11.7	9.7	9.7	11.7	11.7	9.7	9.7	10.7	9.7	10.7	15.7	10.7	10.7	17.7	17.7	11.7	9.7	9.7	9.7	10.7	10.7	9.7	9.7
102822	8	7	12	8	11	7	7	NA	7	8	NA	8	7	12	7	12	7	7	7	7	7	7	7	7	8	7	7	7	7	8	7	7	7	8	7	8	7	NA	NA	7	7	11	7	7	10	7	7	13	7
46044	15	14	15	NA	14	13	NA	NA	NA	24	13	25	13	23	14	13	14	14	26	NA	16	24	13	14	14	17	25	13	13	23	NA	14	NA	13	14	14	13	22	22	13	13	13	14	24	NA	22	24	13	NA
63650	7	7	7	7	7	14	7	7	9	9	7	9	7	7	7	7	7	7	7	7	14	7	7	7	7	7	7	7	7	7	14	7	7	13	7	7	7	14	14	7	7	7	7	7	9	7	7	7	7
98303	10	7	10	NA	7	13	NA	7	6	7	15	7	10	7	NA	NA	NA	8	10	NA	NA	7	10	7	10	6	6	7	7	7	10	15	NA	9	7	NA	7	7	7	7	7	14	14	NA	NA	13	7	14	10
85675	8.7	9.7	9.7	NA	8.7	13.7	8.7	12.7	18.7	8.7	6.7	8.7	4.7	4.7	17.7	8.7	11.7	17.7	6.7	4.7	6.7	12.7	4.7	NA	9.7	8.7	8.7	11.7	11.7	6.7	11.7	8.7	9.7	6.7	4.7	6.7	9.7	12.7	12.7	9.7	9.7	11.7	12.7	9.7	11.7	6.7	NA	9.7	8.7
38510	18	27	11	12	14	18	20	13	11	13	17	13	11	11	24	17	13	12	11	23	16	NA	10	14	13	10	10	21	21	16	12	12	14	18	28	11	11	17	17	10	10	10	11	13	24	17	16	16	24
86626	12	12	12	13	18	12	13	20	17	12	14	12	18	18	17	28	15	13	14	18	13	13	18	13	13	12	12	13	13	13	16	17	13	13	13	14	13	17	17	28	28	13	12	13	17	13	13	13	17
20602	6	6	7	6	6	7	6	6	6	6	7	6	6	8	6	6	6	7	6	13	10	7	6	6	7	6	6	6	6	7	6	6	6	7	7	6	6	7	7	6	6	6	6	6	6	6	6	6	6
25646	6	6	6	6	6	11	6	6	NA	12	NA	12	6	6	NA	10	7	NA	NA	6	6	11	NA	10	NA	6	NA	NA	NA	6	NA	12	13	NA	6	NA	6	NA	NA	6	6	NA	6	6	11	6	6	10	NA
49050	7	22	10	14	17	12	17	14	11	12	14	12	12	8	11	11	11	17	12	11	12	11	8	17	8	12	12	14	14	12	11	11	11	11	18	11	26	21	21	12	12	12	12	11	12	11	13	11	11
8067	12	22	17	26	22	10	18	11	14	12	11	12	16	17	20	11	12	11	11	15	9	18	15	12	16	12	12	11	11	12	9	16	16	11	20	11	12	24	25	11	11	10	12	16	11	12	20	13	9
102918	7.7	7.7	7.7	8.7	7.7	9.7	8.7	7.7	8.7	7.7	7.7	7.7	7.7	7.7	7.7	7.7	7.7	7.7	7.7	7.7	7.7	9.7	9.7	8.7	10.7	7.7	7.7	7.7	7.7	10.7	7.7	7.7	7.7	15.7	7.7	7.7	7.7	7.7	7.7	7.7	7.7	16.7	12.7	8.7	7.7	7.7	7.7	7.7	7.7
25087	7	12	17	10	14	9	NA	NA	12	18	20	18	11	11	10	10	19	10	18	12	19	9	13	12	10	18	13	10	10	10	10	10	9	16	11	19	NA	9	9	18	18	NA	10	17	NA	24	14	19	10
97464	NA	11	19	11	18	9	8	NA	10	NA	10	NA	10	13	11	18	12	11	10	10	10	NA	8	8	8	NA	NA	NA	NA	NA	NA	24	19	12	11	14	10	9	9	NA	NA	17	10	10	21	10	9	10	NA
102277	13.5	20.5	21.5	13.5	13.5	29.5	14.5	15.5	19.5	10.5	13.5	10.5	18.5	13.5	10.5	13.5	17.5	25.5	12.5	13.5	14.5	19.5	23.5	13.5	21.5	23.5	22.5	13.5	13.5	21.5	12.5	19.5	21.5	15.5	14.5	10.5	10.5	14.5	14.5	22.5	22.5	16.5	8.5	13.5	14.5	13.5	12.5	13.5	17.5
16815	NA	5.5	7.5	6.5	10.5	NA	NA	NA	NA	10.5	NA	10.5	5.5	5.5	NA	6.5	11.5	9.5	NA	NA	NA	4.5	10.5	NA	4.5	NA	NA	NA	10.5	4.5	NA	5.5	6.5	NA	NA	NA	NA	NA	NA	NA	NA	NA	5.5	10.5	NA	NA	NA	12.5	6.5
79318	5.5	6.5	10.5	6.5	10.5	10.5	NA	7.5	5.5	11.5	11.5	11.5	13.5	6.5	5.5	5.5	6.5	5.5	5.5	7.5	5.5	5.5	5.5	5.5	NA	5.5	5.5	NA	13.5	7.5	5.5	NA	7.5	6.5	6.5	5.5	5.5	9.5	9.5	5.5	5.5	5.5	7.5	7.5	6.5	16.5	10.5	10.5	5.5
82959	9.3	15.3	7.3	11.3	7.3	10.3	8.3	11.3	7.3	7.3	7.3	7.3	7.3	13.3	7.3	7.3	11.3	8.3	8.3	8.3	7.3	7.3	7.3	8.3	7.3	10.3	4.3	9.3	9.3	7.3	7.3	15.3	15.3	18.3	7.3	14.3	8.3	7.3	7.3	7.3	7.3	8.3	7.3	7.3	7.3	17.3	7.3	7.3	7.3
98763	8.3	8.3	8.3	8.3	8.3	8.3	8.3	8.3	8.3	8.3	8.3	8.3	8.3	8.3	8.3	8.3	8.3	8.3	6.3	18.3	8.3	8.3	8.3	8.3	8.3	6.3	6.3	8.3	8.3	8.3	8.3	8.3	8.3	6.3	8.3	6.3	6.3	8.3	8.3	8.3	8.3	8.3	8.3	8.3	8.3	5.3	8.3	9.3	6.3
42356	11.5	10.5	9.5	16.5	10.5	15.5	10.5	15.5	10.5	10.5	15.5	10.5	14.5	16.5	10.5	10.5	19.5	10.5	16.5	14.5	17.5	13.5	10.5	10.5	17.5	10.5	10.5	15.5	15.5	25.5	17.5	11.5	12.5	10.5	10.5	10.5	10.5	10.5	10.5	16.5	16.5	11.5	14.5	18.5	10.5	15.5	17.5	15.5	11.5
46884	NA	11.5	14.5	NA	12.5	11.5	8.5	11.5	11.5	NA	10.5	NA	11.5	10.5	NA	10.5	12.5	NA	NA	11.5	NA	11.5	9.5	11.5	NA	9.5	NA	NA	NA	15.5	16.5	NA	9.5	NA	9.5	NA	NA	11.5	11.5	NA	NA	NA	NA	NA	11.5	NA	11.5	NA	NA
81826	10.5	NA	11.5	11.5	11.5	16.5	11.5	NA	10.5	NA	23.5	NA	13.5	9.5	11.5	10.5	11.5	11.5	13.5	NA	NA	NA	NA	NA	NA	NA	NA	11.5	11.5	11.5	12.5	12.5	11.5	NA	11.5	NA	13.5	17.5	17.5	NA	NA	NA	10.5	NA	NA	13.5	13.5	10.5	11.5
19821	6.5	2.5	8.5	6.5	14.5	10.5	6.5	6.5	6.5	6.5	6.5	6.5	6.5	6.5	6.5	6.5	6.5	6.5	6.5	6.5	6.5	11.5	8.5	6.5	6.5	6.5	6.5	8.5	8.5	6.5	6.5	6.5	8.5	6.5	6.5	6.5	5.5	6.5	6.5	8.5	8.5	6.5	6.5	6.5	6.5	6.5	6.5	6.5	6.5
98378	NA	6.5	10.5	7.5	7.5	6.5	5.5	NA	6.5	5.5	NA	5.5	5.5	6.5	NA	5.5	10.5	10.5	7.5	5.5	14.5	6.5	NA	NA	NA	NA	NA	5.5	5.5	6.5	NA	NA	5.5	8.5	7.5	NA	6.5	5.5	5.5	5.5	5.5	8.5	NA	5.5	12.5	5.5	6.5	5.5	5.5
44124	NA	11.5	NA	NA	7.5	7.5	7.5	NA	NA	10.5	10.5	10.5	NA	NA	10.5	7.5	7.5	18.5	NA	22.5	NA	NA	21.5	7.5	7.5	20.5	21.5	7.5	7.5	NA	7.5	10.5	10.5	11.5	7.5	10.5	10.5	NA	10.5	20.5	21.5	21.5	NA	10.5	10.5	22.5	7.5	NA	7.5
76968	15	9	13	15	9	12	15	15	9	15	12	15	9	23	9	24	16	9	9	9	20	15	NA	20	9	22	28	17	17	9	15	9	20	9	20	22	9	NA	NA	9	9	24	9	9	17	21	20	13	9
63877	16.7	16.7	16.7	19.7	19.7	19.7	22.7	13.7	19.7	13.7	19.7	13.7	16.7	19.7	20.7	19.7	16.7	20.7	19.7	16.7	19.7	16.7	16.7	16.7	39.7	19.7	19.7	16.7	16.7	13.7	16.7	16.7	16.7	NA	19.7	19.7	NA	19.7	19.7	16.7	16.7	17.7	16.7	16.7	20.7	19.7	17.7	19.7	16.7
3347	9	10	8	10	8	7	7	8	11	10	10	10	8	8	9	10	8	9	9	18	5	10	10	8	8	10	10	10	10	15	7	9	7	8	7	8	8	8	8	10	10	8	8	10	7	9	5	7	8
36738	7	11	9	11	11	11	8	11	7	8	11	8	10	8	9	8	18	8	9	9	8	16	8	11	11	8	8	9	9	11	8	8	11	8	8	8	8	11	11	8	8	8	8	9	8	9	11	11	9
9042	12	12	8	13	18	12	12	12	12	12	12	12	12	12	NA	12	12	12	12	12	12	12	12	12	12	12	12	12	12	12	12	12	12	12	12	27	12	NA	NA	12	12	12	12	12	12	11	11	12	12
24791	15.5	9.5	9.5	9.5	9.5	9.5	9.5	9.5	10.5	9.5	9.5	9.5	9.5	9.5	9.5	9.5	9.5	9.5	10.5	9.5	10.5	9.5	9.5	10.5	10.5	9.5	9.5	9.5	9.5	9.5	9.5	9.5	9.5	9.5	9.5	9.5	9.5	9.5	9.5	9.5	9.5	9.5	9.5	18.5	9.5	9.5	9.5	9.5	9.5
24954	13.7	8.7	8.7	NA	5.7	7.7	NA	7.7	9.7	11.7	9.7	11.7	9.7	9.7	7.7	NA	12.7	18.7	12.7	16.7	9.7	NA	7.7	8.7	19.7	7.7	7.7	NA	NA	19.7	7.7	7.7	NA	11.7	5.7	5.7	12.7	7.7	7.7	11.7	11.7	5.7	9.7	8.7	8.7	8.7	9.7	7.7	7.7
92655	NA	15	NA	15	15	34	10	NA	15	9	16	9	NA	21	15	15	NA	10	NA	18	16	16	NA	9	31	NA	NA	9	9	29	10	17	10	15	NA	10	NA	NA	NA	9	9	NA	16	15	NA	18	15	20	17
17642	6.3	6.3	6.3	6.3	13.3	6.3	9.3	9.3	7.3	6.3	6.3	6.3	6.3	9.3	9.3	10.3	10.3	6.3	6.3	6.3	9.3	6.3	6.3	7.3	9.3	6.3	6.3	10.3	10.3	9.3	9.3	6.3	9.3	6.3	6.3	6.3	6.3	6.3	9.3	6.3	6.3	7.3	6.3	10.3	9.3	6.3	6.3	9.3	9.3
20262	12.5	15.5	12.5	12.5	12.5	12.5	12.5	12.5	14.5	12.5	15.5	12.5	12.5	12.5	12.5	13.5	12.5	12.5	15.5	13.5	12.5	13.5	12.5	12.5	12.5	12.5	12.5	11.5	11.5	12.5	14.5	12.5	12.5	11.5	13.5	13.5	13.5	15.5	15.5	12.5	12.5	12.5	12.5	14.5	13.5	13.5	11.5	15.5	27.5
2845	NA	14	NA	4	4	7	4	NA	16	NA	11	NA	11	8	NA	4	4	14	NA	9	NA	NA	4	10	4	NA	NA	13	13	4	4	NA	4	NA	4	13	7	NA	NA	NA	NA	NA	8	11	5	12	8	4	13
87626	14	11	12	8	5	7	8	5	8	5	9	5	11	11	7	13	5	5	9	11	11	5	5	13	10	5	5	6	6	5	5	5	16	5	5	5	5	8	8	5	5	5	11	11	5	5	11	11	7
4854	9.3	14.3	8.3	8.3	14.3	8.3	8.3	5.3	5.3	12.3	9.3	12.3	5.3	5.3	9.3	NA	9.3	9.3	11.3	5.3	12.3	8.3	15.3	14.3	5.3	8.3	8.3	8.3	8.3	10.3	10.3	9.3	5.3	11.3	10.3	9.3	11.3	9.3	9.3	14.3	14.3	8.3	12.3	10.3	7.3	11.3	5.3	9.3	9.3
46606	7.5	7.5	8.5	8.5	8.5	8.5	14.5	9.5	8.5	8.5	11.5	8.5	7.5	7.5	7.5	8.5	8.5	8.5	8.5	9.5	7.5	9.5	8.5	8.5	8.5	8.5	9.5	8.5	8.5	8.5	8.5	8.5	19.5	8.5	7.5	8.5	8.5	8.5	8.5	9.5	9.5	8.5	12.5	8.5	7.5	9.5	8.5	8.5	7.5
82430	8.5	10.5	8.5	8.5	10.5	8.5	8.5	10.5	10.5	8.5	16.5	8.5	8.5	8.5	8.5	10.5	10.5	8.5	11.5	9.5	19.5	8.5	8.5	8.5	11.5	12.5	8.5	12.5	12.5	10.5	8.5	8.5	10.5	10.5	8.5	11.5	13.5	8.5	8.5	8.5	8.5	10.5	8.5	9.5	8.5	11.5	8.5	8.5	8.5
8749	7	10	10	10	10	20	9	10	19	20	10	20	20	12	10	20	10	20	20	11	19	9	10	10	17	20	13	11	11	10	21	10	10	20	10	11	20	10	10	19	19	9	11	10	10	9	10	10	10
36897	4.1	5.1	5.1	5.1	7.1	10.1	7.1	4.1	4.1	6.1	6.1	6.1	4.1	6.1	5.1	6.1	13.1	9.1	4.1	6.1	5.1	11.1	4.1	8.1	6.1	4.1	4.1	4.1	4.1	7.1	4.1	5.1	5.1	4.1	10.1	4.1	12.1	8.1	8.1	4.1	4.1	4.1	5.1	6.1	10.1	3.1	10.1	5.1	5.1
95711	5.3	5.3	5.3	5.3	7.3	8.3	NA	11.3	5.3	NA	8.3	5.3	5.3	5.3	NA	NA	8.3	NA	NA	NA	5.3	8.3	NA	8.3	8.3	NA	5.3	NA	NA	NA	NA	12.3	5.3	11.3	5.3	11.3	NA	8.3	8.3	NA	NA	NA	5.3	5.3	5.3	8.3	8.3	8.3	5.3
101167	10	9	6	8	9	12	12	12	9	9	9	9	9	9	9	9	12	10	6	9	8	14	9	21	9	6	6	10	10	9	10	10	10	9	9	10	6	10	10	9	9	9	9	6	9	6	9	9	9
13585	9	9	9	20	9	9	9	9	10	10	16	10	9	9	21	18	9	7	17	10	9	10	9	10	9	9	9	9	9	9	20	20	9	9	10	9	9	18	18	10	10	9	9	19	16	9	9	9	10
33039	8	9	9	9	7	10	9	8	9	9	8	9	8	9	9	4	21	9	8	8	16	13	16	16	8	16	16	9	9	16	9	10	8	8	10	8	13	9	9	16	16	13	9	8	13	8	8	8	9
44040	6	6	9	6	11	7	6	10	11	5	11	5	9	9	6	6	11	6	11	5	7	6	6	5	14	6	6	6	6	11	9	9	7	5	6	5	5	11	11	6	6	6	9	7	6	5	6	6	9
76199	7	6	NA	6	NA	11	7	6	8	6	12	6	6	13	6	6	8	7	6	6	7	NA	6	6	8	6	6	6	6	6	6	8	6	6	6	6	7	12	12	6	6	6	6	7	11	7	10	11	6
81861	22.7	6.7	9.7	9.7	9.7	12.7	9.7	9.7	10.7	9.7	9.7	9.7	9.7	12.7	9.7	6.7	10.7	9.7	10.7	6.7	12.7	9.7	9.7	9.7	6.7	9.7	9.7	7.7	7.7	6.7	9.7	9.7	9.7	6.7	6.7	9.7	10.7	12.7	12.7	9.7	9.7	6.7	12.7	10.7	11.7	9.7	6.7	6.7	11.7
97365	8.3	7.3	17.3	16.3	9.3	13.3	11.3	14.3	10.3	14.3	10.3	14.3	15.3	17.3	14.3	11.3	14.3	7.3	11.3	16.3	10.3	11.3	13.3	11.3	21.3	15.3	15.3	14.3	14.3	21.3	13.3	13.3	11.3	15.3	24.3	12.3	12.3	13.3	13.3	14.3	14.3	31.3	14.3	16.3	12.3	16.3	18.3	10.3	13.3
96820	13.3	7.3	16.3	19.3	14.3	22.3	14.3	7.3	10.3	7.3	10.3	7.3	7.3	7.3	7.3	15.3	16.3	10.3	14.3	7.3	16.3	21.3	20.3	7.3	15.3	17.3	10.3	18.3	18.3	7.3	7.3	18.3	10.3	7.3	19.3	7.3	7.3	22.3	22.3	7.3	7.3	12.3	7.3	7.3	18.3	24.3	7.3	18.3	10.3
50053	11	17	16	12	11	10	10	11	11	12	17	12	17	13	NA	13	20	NA	13	20	12	7	11	10	8	11	11	12	12	11	11	NA	16	13	10	10	10	10	10	7	7	14	10	12	10	20	11	10	10
40257	7	10	8	8	11	8	8	8	9	9	8	9	9	11	7	11	8	8	8	9	11	9	8	7	11	10	10	11	11	11	8	8	11	9	18	8	14	8	8	9	9	14	19	10	8	8	8	11	8
55219	23	NA	11	11	NA	17	17	23	24	NA	15	NA	NA	38	NA	10	19	NA	15	12	NA	19	NA	NA	16	23	23	18	18	NA	12	16	NA	19	17	NA	21	15	15	NA	NA	15	12	15	NA	NA	12	16	NA
61812	9	10	NA	10	8	14	8	8	10	6	11	6	8	NA	NA	6	8	NA	9	8	8	11	12	10	8	12	11	13	13	8	8	8	8	19	8	8	9	6	6	12	12	13	8	9	8	8	8	8	NA
45854	15.7	12.7	9.7	10.7	9.7	12.7	8.7	8.7	8.7	8.7	18.7	8.7	9.7	NA	8.7	8.7	9.7	8.7	8.7	8.7	8.7	8.7	8.7	9.7	8.7	8.7	8.7	8.7	8.7	8.7	8.7	8.7	8.7	11.7	8.7	15.7	14.7	8.7	8.7	8.7	8.7	11.7	8.7	8.7	8.7	8.7	8.7	8.7	8.7
30490	11	15	8	9	9	9	10	11	10	10	9	10	10	11	10	10	9	14	9	10	8	22	9	10	22	NA	9	9	9	8	11	10	10	10	9	11	10	9	9	9	9	10	13	10	11	NA	10	9	10
83239	5	8	5	5	5	5	5	10	NA	8	10	8	5	5	5	5	5	5	5	5	5	7	8	8	NA	8	8	8	8	5	5	5	9	NA	5	11	11	8	8	8	8	5	5	NA	NA	5	8	5	5
86978	5	7	8	5	7	5	5	11	5	5	11	5	7	7	5	5	5	5	5	5	11	5	5	5	5	5	5	5	5	11	5	5	5	5	5	5	5	5	5	5	5	7	5	7	5	5	12	11	5
82777	12.5	9.5	14.5	13.5	17.5	14.5	17.5	13.5	NA	NA	13.5	NA	13.5	11.5	11.5	10.5	14.5	NA	10.5	12.5	10.5	12.5	26.5	14.5	18.5	25.5	NA	14.5	14.5	NA	15.5	31.5	12.5	21.5	27.5	10.5	10.5	12.5	12.5	NA	NA	23.5	11.5	12.5	32.5	13.5	13.5	21.5	12.5
40416	12	9	12	10	NA	13	NA	13	9	9	12	9	10	9	9	12	9	9	NA	9	12	19	9	12	9	8	8	13	13	12	9	10	NA	12	9	13	NA	9	9	9	9	NA	9	9	9	9	23	13	9
5270	NA	NA	23.5	10.5	8.5	NA	NA	NA	22.5	10.5	10.5	10.5	9.5	NA	9.5	9.5	8.5	NA	8.5	9.5	NA	NA	NA	8.5	23.5	NA	NA	NA	21.5	9.5	NA	9.5	20.5	NA	9.5	9.5	10.5	NA	NA	11.5	11.5	NA	21.5	11.5	NA	10.5	10.5	NA	8.5
71	22	20	11	16	12	11	14	16	16	16	12	16	12	12	16	16	14	20	13	20	12	16	16	25	16	17	17	16	16	12	20	17	20	11	12	12	34	11	11	14	14	11	12	23	13	12	12	12	16
74867	7.7	7.7	6.7	7.7	8.7	11.7	5.7	7.7	6.7	7.7	10.7	7.7	7.7	7.7	7.7	7.7	5.7	7.7	10.7	7.7	6.7	7.7	7.7	7.7	10.7	5.7	5.7	6.7	6.7	7.7	6.7	7.7	7.7	7.7	7.7	6.7	7.7	9.7	9.7	7.7	7.7	7.7	7.7	7.7	7.7	6.7	5.7	7.7	6.7
84092	9.5	19.5	8.5	11.5	14.5	9.5	21.5	8.5	10.5	18.5	10.5	18.5	11.5	9.5	9.5	10.5	8.5	9.5	10.5	10.5	10.5	9.5	22.5	10.5	21.5	19.5	20.5	10.5	10.5	9.5	21.5	9.5	14.5	10.5	9.5	10.5	12.5	22.5	22.5	18.5	18.5	10.5	12.5	10.5	25.5	10.5	9.5	10.5	9.5
97166	5.6	13.6	5.6	6.6	4.6	5.6	5.6	6.6	6.6	8.6	5.6	8.6	4.6	6.6	6.6	8.6	6.6	6.6	6.6	4.6	3.6	NA	NA	3.6	2.6	4.6	4.6	5.6	5.6	7.6	6.6	2.6	5.6	6.6	7.6	NA	NA	5.6	5.6	8.6	8.6	4.6	7.6	5.6	3.6	5.6	6.6	5.6	6.6
76362	11.5	11.5	12.5	14.5	11.5	13.5	14.5	23.5	13.5	13.5	12.5	13.5	14.5	14.5	12.5	11.5	13.5	14.5	11.5	12.5	11.5	11.5	12.5	23.5	14.5	13.5	12.5	NA	30.5	16.5	14.5	11.5	23.5	11.5	14.5	11.5	11.5	14.5	14.5	13.5	13.5	11.5	12.5	12.5	12.5	12.5	16.5	16.5	NA
25786	9.7	9.7	NA	9.7	9.7	9.7	9.7	NA	NA	NA	NA	NA	NA	NA	NA	9.7	9.7	9.7	9.7	NA	9.7	9.7	9.7	NA	9.7	NA	NA	NA	NA	9.7	NA	23.7	9.7	9.7	9.7	9.7	NA	NA	NA	9.7	NA	10.7	9.7	9.7	9.7	9.7	9.7	NA	NA
3146	NA	9	9	20	11	9	19	11	8	9	20	9	9	9	10	10	9	10	9	14	20	21	12	19	12	9	9	9	9	19	10	10	9	9	NA	9	11	10	10	9	9	9	9	10	18	9	19	18	10
52995	15	9	10	9	8	9	9	9	8	NA	10	9	11	11	12	8	8	15	10	13	10	9	16	8	9	9	11	15	15	9	9	15	9	16	13	8	10	11	11	NA	NA	15	15	9	9	13	13	9	12
88258	17	9	9	8	21	11	17	9	12	7	8	7	9	9	15	8	8	8	9	14	5	9	7	14	15	7	7	13	13	8	15	9	16	16	20	11	11	15	15	7	7	11	9	14	8	17	9	12	15
23932	5.5	11.5	4.5	5.5	8.5	5.5	NA	7.5	8.5	5.5	10.5	5.5	7.5	NA	5.5	10.5	8.5	7.5	NA	5.5	7.5	7.5	7.5	7.5	5.5	5.5	4.5	10.5	10.5	7.5	7.5	13.5	7.5	5.5	5.5	5.5	5.5	5.5	5.5	4.5	4.5	5.5	7.5	5.5	7.5	10.5	7.5	NA	5.5
38119	10	11	11	NA	8	8	NA	NA	11	27	7	27	13	13	NA	NA	11	15	NA	NA	7	NA	NA	NA	11	5	5	NA	NA	7	15	7	NA	7	11	NA	NA	8	8	NA	NA	NA	11	12	7	NA	11	11	NA
81794	13	16	12	12	15	25	15	9	19	26	19	26	16	12	14	15	12	12	26	15	24	NA	25	12	18	24	25	15	15	13	NA	NA	12	12	12	16	NA	15	15	25	25	12	12	16	32	26	16	15	12
21084	NA	15.3	NA	12.3	12.3	14.3	NA	12.3	NA	16.3	15.3	16.3	15.3	17.3	NA	15.3	NA	NA	9.3	16.3	15.3	12.3	16.3	12.3	NA	16.3	14.3	12.3	12.3	NA	12.3	15.3	NA	12.3	12.3	12.3	30.3	NA	NA	15.3	15.3	12.3	12.3	NA	15.3	12.3	17.3	NA	12.3
84219	23.7	12.7	19.7	12.7	9.7	15.7	9.7	21.7	12.7	NA	16.7	NA	24.7	25.7	9.7	16.7	NA	9.7	24.7	25.7	16.7	16.7	12.7	19.7	12.7	NA	NA	19.7	19.7	21.7	12.7	9.7	19.7	15.7	19.7	28.7	41.7	16.7	16.7	NA	NA	20.7	16.7	12.7	10.7	23.7	18.7	16.7	9.7
17871	NA	NA	NA	NA	NA	NA	NA	NA	NA	6	NA	6	NA	NA	NA	NA	NA	NA	NA	NA	NA	NA	NA	NA	NA	6	6	NA	NA	NA	NA	NA	NA	NA	NA	NA	NA	NA	NA	6	6	NA	NA	14	NA	NA	NA	NA	NA
17887	5	NA	NA	NA	NA	NA	NA	7	NA	NA	NA	5	5	NA	7	7	7	NA	NA	NA	8	8	11	8	7	NA	NA	11	11	NA	NA	7	5	12	NA	12	11	10	10	NA	NA	13	4	NA	6	NA	7	13	NA
1859	14	21	13	10	12	10	15	10	10	12	10	12	10	10	10	10	10	10	12	10	12	12	12	13	12	12	12	13	13	10	10	10	10	10	10	10	14	13	13	12	12	10	10	12	10	25	10	10	7
83683	11	10	10	12	15	13	13	11	15	NA	10	30	17	11	14	10	13	14	10	10	7	10	11	13	13	11	11	14	14	15	16	15	13	10	13	10	10	12	12	11	11	10	11	10	15	10	13	13	15
98814	NA	14	12	12	14	12	12	12	12	12	14	12	12	13	12	11	12	12	NA	12	11	NA	12	NA	12	12	12	14	14	12	13	12	12	13	14	26	30	14	14	12	12	13	13	12	15	12	12	14	12
582	4.3	10.3	11.3	13.3	12.3	11.3	12.3	8.3	12.3	12.3	11.3	12.3	12.3	7.3	11.3	14.3	11.3	11.3	28.3	12.3	14.3	12.3	11.3	11.3	10.3	11.3	11.3	12.3	12.3	11.3	11.3	28.3	11.3	11.3	11.3	11.3	11.3	11.3	11.3	11.3	11.3	11.3	11.3	12.3	12.3	13.3	11.3	11.3	11.3
48996	7.5	11.5	10.5	7.5	10.5	10.5	10.5	7.5	14.5	10.5	10.5	10.5	10.5	10.5	9.5	12.5	9.5	10.5	6.5	9.5	12.5	9.5	10.5	10.5	11.5	10.5	11.5	12.5	12.5	12.5	9.5	9.5	5.5	7.5	9.5	15.5	14.5	11.5	11.5	10.5	10.5	7.5	7.5	9.5	10.5	9.5	10.5	10.5	9.5
75908	10.5	11.5	16.5	9.5	10.5	13.5	16.5	10.5	10.5	10.5	10.5	10.5	9.5	13.5	18.5	17.5	10.5	18.5	9.5	9.5	11.5	9.5	15.5	16.5	9.5	15.5	10.5	10.5	10.5	9.5	9.5	11.5	18.5	26.5	9.5	14.5	10.5	10.5	10.5	16.5	16.5	12.5	11.5	10.5	9.5	10.5	10.5	10.5	9.5
83714	25.7	17.7	13.7	18.7	18.7	10.7	18.7	16.7	16.7	22.7	16.7	22.7	23.7	13.7	16.7	14.7	12.7	16.7	13.7	21.7	17.7	10.7	43.7	18.7	16.7	44.7	40.7	18.7	18.7	18.7	14.7	16.7	44.7	17.7	18.7	13.7	13.7	17.7	17.7	40.7	43.7	13.7	18.7	16.7	19.7	13.7	19.7	17.7	18.7
73595	17.3	NA	32.3	NA	26.3	NA	20.3	12.3	45.3	NA	22.3	NA	NA	23.3	NA	NA	18.3	NA	12.3	NA	12.3	NA	NA	NA	21.3	13.3	13.3	NA	NA	NA	NA	16.3	NA	15.3	20.3	27.3	NA	NA	NA	NA	NA	NA	20.3	NA	13.3	NA	16.3	26.3	12.3
17213	11	NA	NA	10	NA	12	NA	9	NA	NA	13	NA	NA	9	12	NA	10	11	12	10	NA	NA	9	11	NA	9	9	9	9	9	9	10	9	13	9	12	12	NA	NA	14	14	11	12	NA	15	NA	NA	NA	NA
681	28	13	13	10	8	8	8	14	8	10	16	10	11	11	21	12	12	21	12	8	12	10	12	11	14	10	10	11	11	11	12	8	11	8	13	8	8	12	12	11	11	8	11	8	8	8	11	11	8
44826	12.3	11.3	10.3	10.3	11.3	16.3	10.3	11.3	23.3	10.3	10.3	10.3	11.3	10.3	10.3	10.3	13.3	16.3	10.3	10.3	13.3	13.3	10.3	12.3	10.3	10.3	11.3	21.3	21.3	10.3	10.3	10.3	9.3	10.3	16.3	10.3	10.3	10.3	10.3	11.3	11.3	10.3	10.3	11.3	10.3	10.3	10.3	10.3	16.3
8893	11.3	9.3	25.3	8.3	11.3	10.3	18.3	13.3	15.3	26.3	12.3	26.3	10.3	6.3	16.3	12.3	8.3	8.3	12.3	7.3	13.3	8.3	9.3	9.3	10.3	26.3	15.3	10.3	10.3	8.3	8.3	10.3	8.3	11.3	11.3	6.3	11.3	16.3	16.3	10.3	10.3	11.3	12.3	12.3	6.3	10.3	10.3	8.3	10.3
62930	9	9	9	10	9	10	9	9	9	10	18	10	9	9	10	17	9	10	9	9	10	15	18	10	9	10	10	10	10	14	10	23	10	9	9	9	8	11	11	10	10	17	9	9	10	9	9	10	23
83936	NA	4.5	4.5	4.5	0	0	4.5	4.5	4.5	NA	11.5	NA	4.5	4.5	NA	NA	4.5	NA	8.5	NA	NA	4.5	10.5	10.5	4.5	11.5	NA	0	0	NA	0	0	0	NA	NA	NA	NA	NA	NA	NA	10.5	NA	NA	4.5	4.5	NA	4.5	11.5	0
8469	9.5	4.5	NA	4.5	10.5	4.5	4.5	NA	4.5	10.5	10.5	10.5	9.5	11.5	4.5	10.5	4.5	4.5	10.5	11.5	4.5	4.5	4.5	4.5	4.5	4.5	4.5	4.5	4.5	4.5	4.5	4.5	4.5	11.5	4.5	4.5	10.5	4.5	4.5	4.5	4.5	10.5	4.5	10.5	4.5	10.5	4.5	4.5	4.5
64270	7.7	8.7	7.7	7.7	7.7	11.7	7.7	7.7	7.7	7.7	7.7	7.7	6.7	7.7	7.7	7.7	7.7	7.7	19.7	7.7	7.7	7.7	7.7	8.7	7.7	7.7	7.7	7.7	7.7	11.7	7.7	7.7	7.7	7.7	11.7	7.7	7.7	11.7	11.7	7.7	7.7	7.7	6.7	11.7	7.7	7.7	7.7	7.7	11.7
74597	7	8	7	6	7	8	6	8	7	7	13	7	8	11	7	7	8	7	7	6	6	13	6	7	6	6	6	12	11	6	7	7	6	12	11	NA	7	11	11	6	6	7	7	12	11	6	7	7	13
88448	8.7	17.7	13.7	8.7	13.7	13.7	15.7	NA	15.7	10.7	15.7	10.7	21.7	13.7	8.7	30.7	14.7	14.7	8.7	14.7	13.7	17.7	9.7	17.7	28.7	9.7	9.7	24.7	24.7	15.7	31.7	8.7	25.7	10.7	33.7	11.7	11.7	24.7	24.7	10.7	10.7	10.7	13.7	15.7	19.7	15.7	35.7	23.7	8.7
20170	5	NA	5	7	NA	5	3	5	12	NA	11	NA	NA	NA	5	5	5	NA	5	5	5	11	4	NA	11	5	5	5	5	5	3	7	NA	NA	5	7	5	NA	NA	NA	NA	5	11	5	5	NA	5	11	5
24931	13	11	11	12	10	6	10	NA	14	12	14	12	15	15	NA	10	11	10	11	10	15	10	NA	11	10	NA	NA	10	10	10	10	NA	10	20	9	NA	11	5	5	12	12	NA	15	10	NA	11	15	10	NA
3058	11	14	NA	NA	9	10	7	10	10	21	11	21	12	10	9	9	9	9	17	11	10	NA	10	9	9	26	26	21	21	10	9	9	11	10	10	10	10	10	10	21	21	10	16	10	9	26	11	NA	9
89672	7.5	7.5	7.5	7.5	NA	7.5	7.5	NA	9.5	9.5	13.5	9.5	9.5	7.5	7.5	7.5	7.5	7.5	7.5	7.5	7.5	7.5	12.5	7.5	NA	12.5	12.5	7.5	7.5	NA	NA	19.5	7.5	7.5	NA	10.5	10.5	7.5	7.5	9.5	9.5	9.5	7.5	8.5	7.5	7.5	7.5	10.5	NA
78534	10.3	7.3	10.3	15.3	11.3	9.3	8.3	8.3	23.3	22.3	11.3	22.3	12.3	10.3	16.3	11.3	10.3	15.3	9.3	10.3	23.3	18.3	13.3	18.3	8.3	13.3	9.3	11.3	11.3	10.3	15.3	15.3	9.3	10.3	8.3	9.3	9.3	11.3	11.3	10.3	10.3	9.3	8.3	10.3	11.3	10.3	27.3	28.3	16.3
100158	5.5	5.5	5.5	6.5	5.5	NA	NA	13.5	5.5	9.5	12.5	9.5	11.5	6.5	NA	NA	5.5	14.5	NA	10.5	7.5	11.5	9.5	5.5	5.5	11.5	11.5	10.5	10.5	5.5	NA	13.5	5.5	NA	5.5	NA	NA	5.5	5.5	9.5	9.5	5.5	5.5	5.5	13.5	5.5	5.5	5.5	5.5
17293	16	21	NA	15	11	15	11	10	12	11	11	11	12	14	10	NA	10	15	12	15	27	16	12	NA	13	12	12	29	28	14	NA	11	14	15	11	12	12	NA	NA	NA	11	14	NA	28	11	14	12	23	NA
58651	13	6	6	6	6	7	7	9	6	6	10	6	6	6	6	16	NA	6	12	NA	6	6	6	6	NA	NA	6	10	10	7	6	6	6	NA	NA	NA	6	6	6	6	6	8	6	6	6	6	6	6	6
80386	10	6	17	7	7	6	19	13	13	12	7	12	14	6	8	11	5	7	5	6	17	7	12	6	5	5	12	7	7	5	8	13	5	5	19	5	5	6	6	9	9	5	17	13	15	5	17	15	8
74917	9.5	10.5	10.5	7.5	8.5	9.5	9.5	10.5	9.5	11.5	11.5	11.5	8.5	9.5	10.5	11.5	9.5	7.5	9.5	10.5	10.5	9.5	10.5	10.5	11.5	10.5	10.5	9.5	9.5	10.5	7.5	13.5	10.5	8.5	7.5	9.5	9.5	11.5	11.5	11.5	11.5	8.5	8.5	8.5	11.5	11.5	9.5	10.5	7.5
15383	NA	NA	23.3	20.3	50.3	22.3	NA	NA	NA	NA	14.3	NA	NA	NA	NA	NA	NA	32.3	15.3	NA	16.3	NA	NA	NA	17.3	NA	NA	NA	NA	NA	28.3	NA	17.3	20.3	NA	19.3	19.3	NA	NA	NA	53.3	NA	NA	19.3	NA	20.3	49.3	17.3	NA
26127	10.3	NA	21.3	7.3	NA	NA	NA	7.3	NA	NA	8.3	24.3	NA	8.3	20.3	8.3	NA	8.3	9.3	NA	8.3	7.3	20.3	9.3	8.3	NA	NA	9.3	9.3	8.3	8.3	20.3	16.3	25.3	8.3	NA	22.3	NA	NA	17.3	NA	NA	9.3	12.3	NA	22.3	8.3	9.3	20.3
82390	9.3	6.3	6.3	6.3	6.3	6.3	9.3	9.3	6.3	9.3	9.3	9.3	6.3	6.3	6.3	6.3	6.3	6.3	15.3	6.3	8.3	8.3	9.3	9.3	6.3	6.3	9.3	15.3	15.3	6.3	11.3	6.3	6.3	5.3	6.3	6.3	5.3	9.3	9.3	17.3	17.3	5.3	6.3	8.3	9.3	5.3	6.3	9.3	6.3
7966	19	22	11	8	10	8	8	11	11	6	8	6	9	9	8	8	11	11	NA	6	NA	8	8	11	12	6	8	8	8	11	8	8	8	12	8	11	12	NA	NA	8	8	13	9	12	8	11	NA	12	8
64287	11	8	9	6	13	9	25	8	9	9	12	9	7	7	12	5	9	12	NA	9	8	8	17	10	9	13	13	13	13	9	9	7	11	7	9	22	4	9	9	10	10	8	7	9	NA	7	9	12	10
76533	32.5	12.5	33.5	11.5	NA	32.5	12.5	12.5	19.5	13.5	14.5	13.5	12.5	13.5	NA	NA	NA	12.5	13.5	12.5	13.5	19.5	12.5	12.5	NA	12.5	19.5	17.5	17.5	NA	13.5	12.5	20.5	13.5	NA	13.5	12.5	12.5	12.5	13.5	13.5	13.5	30.5	34.5	12.5	13.5	NA	9.5	13.5
40529	7.3	7.3	16.3	12.3	15.3	10.3	16.3	25.3	25.3	9.3	10.3	9.3	12.3	16.3	22.3	7.3	18.3	22.3	7.3	13.3	8.3	7.3	7.3	23.3	22.3	8.3	8.3	7.3	7.3	7.3	22.3	12.3	10.3	7.3	27.3	11.3	7.3	10.3	10.3	9.3	9.3	7.3	8.3	13.3	19.3	7.3	15.3	7.3	22.3
77206	8.3	8.3	8.3	8.3	8.3	7.3	7.3	7.3	8.3	7.3	11.3	7.3	6.3	9.3	7.3	9.3	10.3	9.3	8.3	8.3	8.3	10.3	9.3	8.3	11.3	11.3	8.3	8.3	8.3	11.3	7.3	8.3	8.3	22.3	9.3	10.3	9.3	9.3	9.3	10.3	10.3	23.3	8.3	8.3	9.3	8.3	8.3	8.3	7.3
62492	7.7	NA	NA	7.7	NA	7.7	7.7	7.7	11.7	NA	17.7	7.7	NA	NA	NA	7.7	7.7	7.7	NA	8.7	7.7	7.7	7.7	7.7	NA	8.7	8.7	7.7	7.7	7.7	7.7	7.7	7.7	7.7	7.7	8.7	8.7	NA	NA	NA	7.7	7.7	NA	7.7	7.7	8.7	7.7	7.7	7.7
84715	11.5	13.5	14.5	31.5	14.5	13.5	11.5	14.5	13.5	11.5	13.5	11.5	10.5	14.5	11.5	11.5	13.5	11.5	14.5	11.5	11.5	11.5	11.5	13.5	14.5	11.5	11.5	11.5	11.5	NA	14.5	11.5	33.5	11.5	NA	11.5	14.5	11.5	11.5	11.5	11.5	11.5	14.5	14.5	10.5	14.5	11.5	13.5	13.5
87329	3.7	3.7	10.7	6.7	3.7	6.7	3.7	3.7	17.7	3.7	6.7	3.7	6.7	6.7	3.7	3.7	10.7	3.7	19.7	6.7	6.7	3.7	3.7	3.7	3.7	3.7	3.7	3.7	3.7	6.7	14.7	3.7	3.7	14.7	3.7	6.7	14.7	6.7	6.7	6.7	6.7	14.7	10.7	6.7	3.7	6.7	6.7	6.7	3.7
39427	17.7	13.7	14.7	10.7	12.7	10.7	12.7	13.7	13.7	10.7	10.7	10.7	10.7	10.7	18.7	10.7	18.7	10.7	10.7	10.7	10.7	10.7	10.7	10.7	13.7	10.7	10.7	13.7	13.7	10.7	10.7	10.7	10.7	10.7	17.7	10.7	10.7	10.7	10.7	10.7	10.7	10.7	14.7	18.7	13.7	10.7	10.7	14.7	18.7
43147	8.7	11.7	28.7	9.7	10.7	10.7	10.7	9.7	9.7	NA	18.7	8.7	23.7	22.7	10.7	NA	NA	10.7	8.7	31.7	10.7	9.7	NA	11.7	NA	NA	NA	10.7	10.7	9.7	11.7	11.7	8.7	9.7	11.7	NA	NA	10.7	NA	NA	NA	9.7	10.7	NA	10.7	NA	18.7	10.7	11.7
47029	NA	10	10	NA	NA	NA	NA	NA	NA	10	NA	10	NA	NA	NA	NA	10	NA	10	NA	NA	10	10	NA	NA	10	10	NA	NA	NA	NA	10	NA	10	NA	NA	NA	NA	10	10	10	10	NA	NA	NA	NA	NA	NA	NA
96928	10	7	9	16	7	16	9	9	15	7	9	7	9	9	14	7	9	14	9	NA	14	15	9	16	9	17	18	7	7	NA	14	7	9	7	14	9	9	16	16	7	7	16	7	NA	14	7	9	14	9
43048	29.3	11.3	12.3	11.3	12.3	7.3	7.3	12.3	12.3	29.3	12.3	29.3	9.3	12.3	7.3	7.3	8.3	7.3	13.3	9.3	7.3	11.3	28.3	8.3	7.3	27.3	27.3	7.3	7.3	11.3	7.3	7.3	10.3	11.3	8.3	12.3	11.3	7.3	7.3	NA	8.3	11.3	8.3	12.3	8.3	12.3	12.3	13.3	7.3
81607	6	6	6	NA	7	18	7	19	NA	6	7	6	6	6	7	18	6	7	6	7	7	5	NA	NA	NA	NA	NA	5	5	7	6	7	7	6	7	6	6	7	7	NA	NA	6	6	6	7	6	6	NA	7
103981	7.3	NA	NA	21.3	8.3	8.3	7.3	17.3	16.3	10.3	8.3	10.3	10.3	8.3	7.3	9.3	8.3	16.3	9.3	7.3	8.3	7.3	10.3	7.3	8.3	7.3	7.3	9.3	9.3	10.3	8.3	26.3	5.3	9.3	7.3	8.3	9.3	8.3	8.3	10.3	10.3	9.3	9.3	7.3	17.3	8.3	8.3	8.3	26.3
74375	5	5	7	5	8	6	5	5	6	NA	6	NA	10	6	14	9	16	14	4	9	5	6	8	NA	NA	7	7	NA	NA	NA	5	5	NA	4	5	5	4	5	5	NA	5	4	15	6	7	6	6	NA	NA
97752	9.3	9.3	8.3	9.3	6.3	6.3	NA	6.3	6.3	NA	8.3	9.3	NA	6.3	9.3	6.3	9.3	9.3	6.3	6.3	8.3	9.3	9.3	6.3	9.3	9.3	9.3	6.3	6.3	9.3	9.3	6.3	6.3	8.3	9.3	9.3	9.3	6.3	6.3	9.3	9.3	6.3	6.3	6.3	9.3	6.3	9.3	8.3	9.3
33137	28.7	5.7	NA	8.7	11.7	8.7	8.7	5.7	8.7	7.7	8.7	7.7	8.7	8.7	9.7	9.7	NA	NA	NA	NA	NA	NA	7.7	7.7	5.7	7.7	7.7	NA	NA	7.7	8.7	8.7	9.7	8.7	NA	8.7	8.7	8.7	8.7	7.7	7.7	8.7	8.7	9.7	8.7	7.7	8.7	NA	9.7
5792	11.5	8.5	11.5	8.5	8.5	8.5	13.5	8.5	8.5	15.5	14.5	15.5	8.5	8.5	8.5	8.5	14.5	8.5	9.5	8.5	8.5	8.5	13.5	8.5	8.5	16.5	16.5	8.5	8.5	8.5	8.5	14.5	8.5	8.5	8.5	16.5	8.5	13.5	13.5	8.5	8.5	8.5	8.5	8.5	8.5	14.5	8.5	8.5	8.5
35201	8	6	6	8	6	8	8	8	8	NA	8	NA	NA	NA	8	8	8	8	NA	8	NA	8	NA	8	NA	NA	8	8	8	6	8	NA	8	NA	7	NA	NA	NA	NA	NA	NA	26	6	6	8	NA	27	NA	8
100082	3.7	4.7	5.7	4.7	6.7	5.7	6.7	5.7	6.7	5.7	6.7	5.7	8.7	5.7	NA	7.7	5.7	5.7	5.7	7.7	NA	5.7	5.7	5.7	NA	6.7	6.7	6.7	6.7	8.7	5.7	NA	6.7	19.7	6.7	15.7	14.7	5.7	5.7	5.7	5.7	8.7	5.7	5.7	6.7	NA	8.7	NA	5.7
7150	NA	10.5	12.5	NA	NA	18.5	NA	NA	22.5	11.5	12.5	11.5	NA	12.5	13.5	12.5	15.5	18.5	NA	35.5	10.5	10.5	14.5	NA	NA	14.5	14.5	10.5	10.5	10.5	13.5	NA	NA	19.5	13.5	11.5	12.5	18.5	18.5	16.5	16.5	12.5	NA	12.5	16.5	13.5	10.5	NA	13.5
32842	NA	NA	NA	NA	NA	NA	NA	NA	NA	NA	11.3	NA	NA	NA	NA	NA	NA	NA	NA	NA	NA	NA	11.3	11.3	NA	11.3	11.3	NA	NA	11.3	NA	NA	NA	40.3	NA	NA	NA	NA	NA	11.3	11.3	NA	NA	NA	NA	28.3	NA	NA	NA
77933	8	16	22	24	4	9	4	12	4	4	8	4	11	4	11	29	25	11	21	4	4	8	4	4	4	4	4	8	8	15	8	8	8	21	4	8	8	9	9	4	4	17	17	4	25	20	12	4	11
45985	NA	9	9	10	11	27	9	9	33	9	10	9	9	9	9	10	9	9	12	9	9	9	9	11	9	9	9	10	10	9	9	9	9	10	9	13	10	9	9	11	11	10	9	10	9	9	10	10	9
84110	6.7	6.7	6.7	6.7	6.7	6.7	6.7	6.7	6.7	24.7	6.7	24.7	6.7	6.7	6.7	6.7	3.7	6.7	6.7	6.7	6.7	6.7	6.7	6.7	6.7	24.7	24.7	6.7	6.7	7.7	6.7	6.7	6.7	6.7	6.7	6.7	6.7	6.7	6.7	6.7	6.7	6.7	6.7	6.7	6.7	6.7	6.7	6.7	6.7
41915	NA	12	10	9	9	8	9	NA	8	10	11	10	11	14	9	NA	8	11	11	11	11	NA	NA	9	10	NA	NA	12	11	13	10	12	9	13	8	10	10	12	12	10	10	NA	10	10	12	11	11	11	5
95706	9	9	10	7	3	7	8	8	8	7	7	7	10	10	8	9	7	8	7	9	7	7	9	7	7	9	7	9	9	9	8	8	9	12	9	12	30	7	7	7	7	9	10	10	9	7	7	7	7
414	10	8	NA	10	7	8	8	8	8	9	13	9	15	NA	8	27	8	8	10	8	NA	13	9	13	NA	9	9	23	23	13	8	8	8	8	34	17	14	8	8	9	9	8	13	8	8	14	13	16	8
7358	8.7	34.7	18.7	8.7	8.7	12.7	12.7	8.7	8.7	8.7	8.7	8.7	8.7	18.7	8.7	NA	8.7	9.7	14.7	11.7	8.7	11.7	8.7	25.7	18.7	8.7	24.7	8.7	8.7	8.7	8.7	8.7	8.7	8.7	8.7	8.7	14.7	12.7	12.7	8.7	8.7	14.7	18.7	11.7	8.7	13.7	11.7	9.7	8.7
25619	8	18	13	24	13	9	9	11	9	8	9	8	13	13	8	10	13	9	NA	21	8	8	8	10	9	8	8	9	9	11	8	8	9	NA	NA	NA	10	9	9	8	8	24	13	9	9	18	9	8	8
15746	NA	7.3	NA	NA	NA	7.3	7.3	10.3	NA	NA	7.3	NA	NA	NA	7.3	NA	NA	10.3	NA	NA	NA	NA	NA	NA	NA	NA	NA	10.3	10.3	NA	7.3	8.3	NA	7.3	NA	8.3	NA	NA	NA	NA	NA	NA	7.3	NA	8.3	8.3	NA	NA	NA
19084	7.3	7.3	26.3	7.3	7.3	30.3	7.3	6.3	7.3	NA	7.3	7.3	7.3	7.3	7.3	NA	8.3	7.3	NA	8.3	7.3	7.3	NA	NA	7.3	NA	NA	NA	29.3	7.3	7.3	7.3	7.3	10.3	8.3	10.3	NA	7.3	7.3	NA	NA	7.3	7.3	9.3	8.3	32.3	7.3	NA	7.3
5427	NA	NA	6.5	NA	NA	NA	NA	NA	8.5	6.5	NA	6.5	NA	NA	NA	NA	NA	NA	NA	NA	NA	NA	2.5	NA	2.5	NA	NA	2.5	2.5	NA	NA	NA	NA	2.5	NA	2.5	NA	NA	NA	NA	NA	NA	NA	NA	NA	NA	NA	NA	NA
2539	NA	5.7	NA	5.7	5.7	5.7	6.7	26.7	6.7	14.7	6.7	14.7	16.7	NA	NA	NA	6.7	16.7	18.7	NA	NA	5.7	5.7	5.7	6.7	NA	26.7	NA	NA	NA	14.7	NA	5.7	NA	5.7	31.7	NA	NA	NA	NA	NA	NA	NA	6.7	NA	NA	6.7	NA	6.7
89068	9	3	NA	10	NA	NA	3	9	3	NA	9	NA	16	NA	3	6	3	3	NA	NA	NA	9	NA	3	NA	NA	NA	6	6	NA	9	3	6	2	10	2	2	NA	NA	NA	3	2	14	3	10	NA	NA	9	3
47883	2	2	2	2	2	2	2	2	2	2	10	2	2	2	2	2	2	2	2	2	2	2	2	2	2	2	2	2	2	2	2	2	2	2	6	2	2	2	2	2	2	2	2	2	2	2	2	2	2
65400	18.7	NA	2.7	4.7	2.7	4.7	2.7	2.7	4.7	2.7	6.7	2.7	2.7	6.7	NA	6.7	6.7	2.7	NA	2.7	6.7	NA	2.7	10.7	6.7	2.7	NA	NA	NA	6.7	4.7	2.7	6.7	7.7	2.7	6.7	7.7	NA	NA	2.7	2.7	7.7	2.7	6.7	2.7	NA	6.7	6.7	NA
[truncated: 49 more columns]

## Sheet: expanded_strs_010917
ID	Unit.Size	X..of.Units	Purity	TRF.score	VARscore	Consensus	Size.of.Locus	annotation	chr	start	stop	transposon	gene	DHS	Expansion score
65400	3	6.7	100	40	0.303382	CAA	20.1	intron	Chr4	672378	672397	0	AT4G01540	0	5.92593
47883	2	10	100	40	0.855577	AT	20	UTR	Chr3	5587549	5587568	0	AT3G16440	0	4.5
89068	2	10	100	40	0.855577	TA	20	Intergenic	Chr5	9760426	9760445	1	AT5TE35475	0	4.33333
2539	3	6.7	100	40	0.303382	AGA	20.1	coding	Chr1	4261712	4261731	0	AT1G12490	0	3.73134
5427	4	8.5	90	54	0.511214	TATA	34	intron	Chr1	8541165	8541198	0	AT1G24145	0	3.6
19084	3	7.3	100	44	0.435838	CTT	21.9	UTR	Chr1	21181668	21181689	0	AT1G56540	0	3.42466
15746	3	7.3	100	44	0.435838	AGA	21.9	coding	Chr1	17436847	17436868	0	AT1G47510	0	3.15068
25619	3	9	91	47	0.581349	TCT	27	UTR	Chr1	30082339	30082365	0	AT1G79970	0	3
7358	3	8.7	91	45	0.530293	TTC	26.1	intron	Chr1	11087597	11087622	0	AT1G31070	0	2.98851
414	3	13	94	71	1.04088	GAA	39	UTR	Chr1	641971	642008	0	AT1G08815	0	2.77778
95706	3	7	100	42	0.37134	TCA	21	UTR	Chr5	15004737	15004757	0	AT5G37780	0	2.75
41915	2	11	100	44	0.954678	AT	22	intron	Chr2	15267011	15267032	0	AT2G36390	0	2.7
84110	3	6.7	100	40	0.303382	AGG	20.1	UTR	Chr5	3433738	3433757	0	AT5G10880	0	2.68657
45985	2	10	100	40	0.855577	TC	20	Intergenic	Chr3	2321443	2321462	0	NA	1	2.66667
77933	3	8	100	48	0.573207	TGA	24	UTR	Chr4	12336368	12336391	0	AT4G23680	0	2.625
32842	3	11.3	100	68	0.996479	GAA	33.9	Intergenic	Chr2	5490658	5490691	0	NA	0	2.56637
43048	3	12.3	94	67	0.999768	TTC	36.9	UTR	Chr2	16925770	16925806	0	AT2G40520	0	2.53012
7150	2	12.5	100	50	1.05197	AG	25	intron	Chr1	10817051	10817075	0	AT1G30540	0	2.51852
100082	6	6.7	94	73	0.236766	CTCCGG	40.2	coding	Chr5	19584200	19584239	0	AT5G48320	0	2.45614
35201	3	8	100	48	0.573207	ACC	24	coding	Chr2	7039826	7039849	0	AT2G16250	0	2.375
5792	2	14.5	92	51	1.05688	AG	29	intron	Chr1	9023890	9023918	0	AT1G26100	1	2.35294
33137	3	8.7	91	45	0.530293	TCT	26.1	coding	Chr2	5736639	5736664	0	AT2G13770	0	2.29885
97752	3	8.3	95	45	0.526017	CAC	24.9	coding	Chr5	16915919	16915944	0	AT5G42310	0	2.28916
74375	6	6	100	72	0.163536	CAAGAA	36	UTR	Chr4	7654240	7654275	0	AT4G13160	0	2.2
103981	3	8.3	100	50	0.6266	ATG	24.9	Intergenic	Chr5	25146813	25146837	0	NA	0	2.16867
81607	3	7	100	42	0.37134	AGA	21	UTR	Chr4	18243655	18243675	0	AT4G39170	0	2.16667
96928	3	9	91	47	0.581349	CAT	27	Intergenic	Chr5	16009433	16009459	0	NA	0	2.11111
47029	2	18	94	65	1.06283	CT	36	UTR	Chr3	4136084	4136119	0	AT3G12955	0	2

## Sheet: expansions
str	expansion in strain(s)	ref_allele	expanded_allele	annotation	unit size	gene(ifany)	checkedbam?	gene_function	notes	f primer (rt_1)	r primer (rt_1)	f primer to check intron retention (rt_3)	rt_1_tm	f primer (rt_2)	r primer (rt_2)		f primer (seq)	r primer (seq)	ZT
15746	Nd-1	7.3	30.3	intron	3	AT1G47510.1	y	inositol poly-P phosphatase	last intron	CCTACATTGTACTTGTAGGTTGGT	CATCCTGTTCGATCTCTTATCCAA		54	GATTGAAGATGGTTTTGGATAAGAGA	CATACATTAGTAAAAGAATTAAAGGCAGAG				12
65400	Mr-0	6.7	18.7	intron	3	AT4G01540.1	y	NTM1 TF, cell div,membrane-bound	leaf serration phenotype in mr-0, also seen in ntm1-D, pub http://www.plantcell.org/content/18/11/3132/F2.expansion.html	CCTCTTTTATCCCTAATTTCCCGATC	GAGTCACAAACCCAGCAAGGATTT	CAA CAT ATT TCC TCT TAT GAT GAG GCA AG	55	CTTGTTTCACCTCTTGTGTTAATTCC	GTTACCAAGGAACATCAAGTCC		rt1	rt1	12
47883	Zdr-1,Wt-5,Col-0	2 (not col)	10,11	plusminus1kb	2	AT3G16440.1	y	MATERNAL EFFECT EMBRYO ARREST 36	described pmid 15634699, 3' UTR?	GGAATCGAAACGTTTGAGGTTGATGCAGA	GTC CAT GGA ACC CAA CAA GTT T		55						12
5427	Ws-0	2.5 (not col)	11.5	intron	4	AT1G24145.1	y	unknown,endomembrane		CTTTCACAATATGTAGATGGAAACGGTT	new:GAT GAC CAT AAA TTG TTT TTG ACG GC;old:GACGGCTCTTTTTCAATGTTTTTTTGT		55	CAA ACT CGG TGG ACC GAA AA	GATTTGATCAGGACGTAATTGATGAC				12
89068	Bor-1	2.5 (not col)	16		2		y												12
100082	Kas-2	6.7	19.7	exon	6	AT5G48320.1	y	unknown, Cysteine/Histidine-rich C1 domain family protein	[PE]n										12
103981	NFA-8	8.3 (not col)	26.3	plusminus1kb	3	AT5G62630.1	y	HIPL2											12
19084	Ms-0	7.3	32.3	exon	3	AT1G56540.1	y	Disease resistance protein (TIR-NBS-LRR class)	str overlaps toll-IL receptor?, CTT str in expansion has [CAT]_5 sub-str!!										12
2539	Kz-1	6.7	31.7	exon	3	AT1G12490.1	ambig,approx right	F-box associated ubiquitination effector family	str overlaps f-box domain										12
25619	PNA-10	9	36	intron	3	AT1G79970.2	ambig,approx right	unknown	was misannotated as intron										4
32842	Kas-2	11.3	40.3	nc	3														12
33137	Mr-0	8.7	28.7	exon	3	AT2G13770.1		Putative harbinger transposase-derived nuclease											12
35201	cvi/yo/pna-17/10/mt-0	8	27	exon	3	AT2G16250.1		Leucine-rich repeat protein kinase family											12
414	Knox-18	13	34	nc	3														12
41915	Tamm-2	11	37	intron	2	AT2G36390.1		BE3, BRANCHING ENZYME 3,	many phenotypes, see tair	CGCATGGATACCCCATCT	CGTACTACTCATTCCAACATGTGAT		55	CTCTCGTTCTTCTGGGAAGGTT	CTGAGTATCGTCAGAGACAGTATCC				12
43048	mr-0/bil-5/7	12.3	29.3	plusminus1kb	3	AT2G40520.1		Nucleotidyltransferase family protein											12
45985	br-0/uod-1	10	33	dhs	2	AT3G07290.1		Pentatricopeptide repeat (PPR) superfamily											12
5792	sq-8	14.5 (not col), 8.5 (TAMM)	28.5	intron/dhs	2	AT1G26100.1		Cytochrome b561/ferric reductase transmembrane protein family	multiple strs in intron?	CAA ACA CTG CAG AGG CCA	GCT GAT GGT GAT TGG CTT CA	new:CAC TGG GCA GCG AAG AGA GAA AC	55	CAC TGG GCA GCG AAG AGA	GCT GTT CAT TTA TGG CTA CAA GGA ATG				12
7150	tsu-1	12.5	47.5	intron	2	AT1G30540.1		Actin-like ATPase superfamily		CTTGATAAGAAGTTCATGGCCAACA	GTT GTA ATG GTA GGC GGA GTC	GTT TAT GTG GCA AAG ATG GGA CA	55	CTG CAG TTT CTC CAA CGC T	CAC GGA GGA GAA CGG TTT				12
7358	omo2-1	8.7	34.7	intron	3	AT1G31070.2		GLCNAC1PUT1		GTT GAC AGT AGT TGA GTA TAG TGA GCT T	CGG TCG CTA CTT GAT TAA GGA AA		55	CGG TGA CTT CTC CTC CTC	CTTGGAAGATCCAAATTCTCAATATCTCTAA				12
74375	c24	6	16	exon	6	AT4G13160.1		DUF593											12
77933	ull2-3	8	29	plusminus1kb	3	AT4G23680.1		Polyketide cyclase/dehydrase and lipid transport superfamily											12
81607	wt-5,ts-1,an-0,ag-0	7	19	plusminus1kb	3	AT4G39180.1		ATSEC14	little described, seems important										12
84110	fab-2/4,bil-5/7	6.7	24.7	exon	3	AT5G10880.1		tRNA synthetase-related / tRNA ligase-related											12
95706	kz-9	7	30	plusminus1kb	3	AT5G37780.1		CALMODULIN 1	defense/lesion formation- wei-0 str is contracted(n=3), has defense response crossed against REN-11 (n=7, bomblies 2007), but not others (po-1, be-1, another paper miller 2014 ncomms shows col ler c24 with no apparent immune response...)	GAAGCTTTTAGCCTCTTCGACAAA	GGA AGT CGA TAG TGC CGT TT								12
96928	oy-0	9	28		3														12
97752	wa-1	8.3	27.3	exon	3	AT5G42310.1		Pentatricopeptide repeat (PPR-like) superfamily											12
																			12

## Sheet: pheno_test
str	phenotocheck	gene	crosses	primer_f	primer_r	none	status
2539	?	AT1G12490	kz-9xcol,colxkz-9	have?	have?		f1s growing
65400	leaf shape, kinetin	ntm1	mr-0xra-0,ra-0xmr-0,Mr-0xcol,colxmr-0	have	have		f1s growing
87329	?, stress?	AT5G24190.1	kz-9xsq-8
35201	?	AT2G16250.1	kz-9xsq-8,kz-9xnd-1
15746	hc length in dark,http://link.springer.com/article/10.1007%2Fs11103-008-9327-3	AT1G47510	nd-1xcol,nd-1xwei-0	have?	have?		analyzing f2 phenos
77933	?	AT4G23680.1	nd-1xwei,nd-1xsq-8	CGA TCC ACA AGA CCC CAT TTA TT	GCTGACATGGGAAACCACGTT	140bp prod	plated f2s*
87626	?	AT5G24870	kz-9xsq-8	have?	have?
73178	flowering	AT4G10600	col xs kz-9				f1s growing
4806	seedling dormancy (strwa)	AT1G21970.1	nd-1xwei	have?	have?	gwas	plated f2s*

## Sheet: pos_select
str	acc	gene	link_gene
7564	an-0	agl92	AT1G31640
39221	ra-0	eil3	AT2G27050
2539	kz-1	??	AT1G12490
19084	ms-0
35201	cvi-0
