# Supplementary material for: Massive variation of short tandem repeats with functional consequences across strains of Arabidopsis thaliana
Source: HighWire-hosted journal article supplement (doi:10.1101/gr.231753.117), 2018-07-03
Supplement: Supplemental_File_S4.zip [file final_picked_STRs_021816.xlsx]

## Sheet: Sheet1
ID	Chromosome	Genomic Start	Genomic End	TAIR10start	TAIR10end	Unit Size	# of Units	Purity	TRF score	VARscore	Consensus	Size of Locus			genes at	genes	introns at	introns	genes+introns	annotation	1kb at	1kb		HS
18	1	8669	8699	8669	8699	2	15.5	100	62	1.10049	CT	31			.		.		0	DHS	AT1G01020.1	1	1	DHS
61	1	62347	62372	62347	62372	3	8.7	100	52	0.692832	AAG	26.1		intron, AT1G01130	AT1G01130.1	1	AT1G01130.1	1	2	intron	AT1G01130.1	1	3	.
67	1	64873	64895	64873	64895	3	7.7	100	46	0.516554	AAG	23.1		intron, AT1G01140, CIPK9, CBL-interacting protein kinase 9	AT1G01140.2	1	AT1G01140.2	1	2	intron	AT1G01140.2	1	3	.
71	1	72350	72373	72350	72373	2	12	90	41	0.895204	AG	24			.		.		0	DHS	AT1G01160.1	1	1	DHS
94	1	97189	97217	97189	97217	3	9.7	92	51	0.705979	GAA	29.1		exon, AT1G01225	AT1G01225.1	1	.		1	exon	AT1G01225.1	1	2	.
96	1	101839	101861	101839	101861	2	11.5	100	46	0.993576	TC	23			.		.		0	DHS	AT1G01240.1	1	1	DHS
116	1	151051	151078	151051	151078	5	5.6	100	56	0.0430605	AAAGC	28			AT1G01400.1	1	.		1	exon	AT1G01400.1	1	2	.	unknown
127	1	182328	182354	182328	182354	4	7	95	49	0.277542	AATG	28			.		.		0	DHS	AT1G01490.1	1	1	DHS
158	1	246694	246714	246694	246714	2	10.5	100	42	0.908802	AT	21			AT1G01680.1	1	AT1G01680.1	1	2	intron	AT1G01680.1	1	3	.
175	1	270496	270614	270496	270614	2	59.5	100	238	3.3927	AG	119			AT1G01725.1	1	AT1G01725.1	1	2	intron/DHS	AT1G01730.1	1	3	DHS
176	1	271639	271663	271639	271663	3	8.3	100	50	0.6266	ACT	24.9		exon, AT1G01730,	AT1G01730.1	1	.		1	exon	AT1G01740.1	1	2	.
188	1	295470	295490	295470	295490	3	7	100	42	0.37134	AAG	21		exon, AT1G01810	AT1G01810.1	1	.		1	exon	AT1G01820.1	1	2	.
189	1	298235	298255	298235	298255	2	10.5	100	42	0.908802	TG	21			.		.		0	DHS	AT1G01820.1	1	1	DHS
211	1	354678	354717	354678	354717	3	13.7	94	75	1.07122	AGA	41.1		exon, AT1G02020, oxidoreductase	AT1G02020.1	1	.		1	exon	AT1G02030.1	1	2	.
212	1	355579	355598	355579	355598	3	6.7	100	40	0.303382	TCT	20.1		exon, AT1G02030, TF	AT1G02030.1	1	.		1	exon	AT1G02030.1	1	2	.
222	1	366878	366903	366878	366903	2	12.5	92	45	0.963768	TA	25			AT1G02065.1	1	AT1G02065.2	1	2	intron	AT1G02065.2	1	3	.
232	1	420894	420918	420894	420918	3	8.3	100	50	0.6266	TCA	24.9			AT1G02205.1	1	AT1G02205.1	1	2	intron	AT1G02205.1	1	3	.
248	1	427425	427463	427425	427463	2	20	94	73	1.01031	AT	40			.		.		0	plus/minus 1kb	AT1G02210.1	1	1	.
264	1	446287	446312	446287	446312	3	9	91	47	0.581349	ATT	27			.		.		0	DHS	AT1G02270.1	1	1	DHS
299	1	505763	505800	505763	505800	2	19	94	69	1.03897	AT	38			AT1G02460.1	1	AT1G02460.1	1	2	intron/DHS	AT1G02460.1	1	3	DHS
414	1	641971	642008	641971	642008	3	13	94	71	1.04088	GAA	39			.		.		0		.			.
416	1	644493	644516	644493	644516	3	8	100	48	0.573207	AAG	24			.		AT1G02880.2	1	1	exon/DHS	AT1G02890.1	1	2	DHS
417	1	645314	645339	645314	645339	2	13	100	52	1.07224	TA	26			.		.		0	plus/minus 1kb	AT1G02890.1	1	1	.
418	1	647325	647350	647325	647350	4	6.5	90	45	0.0792673	AAGA	26			AT1G02890.1	1	AT1G02890.1	1	2	intron	AT1G02890.1	1	3	.
441	1	693416	693460	693416	693460	3	15	95	83	1.1058	TCT	45			.		.		0	plus/minus 1kb	AT1G03010.1	1	1	.
538	1	808604	808625	808604	808625	3	7.3	100	44	0.435838	CTT	21.9			AT1G03290.1	1	.		1	exon	AT1G03290.1	1	2	.
571	1	864036	864074	864036	864074	3	12.7	91	57	0.99459	CTT	38.1			.		.		0	DHS	AT1G03457.1	1	1	DHS
576	1	867676	867706	867676	867706	3	10.3	100	62	0.904241	TTC	30.9			.		.		0	DHS	AT1G03470.1	1	1	DHS
582	1	872746	872779	872745	872778	3	11.3	100	68	0.996479	CAA	33.9			AT1G03490.1	1	.		1	exon	AT1G03490.1	1	2	.
613	1	921463	921483	921463	921483	2	10.5	100	42	0.908802	AT	21			AT1G03700.1	1	AT1G03700.1	1	2	intron	AT1G03700.1	1	3	.
616	1	923979	924013	923979	924013	3	11.7	93	63	0.944133	CTA	35.1			AT1G03710.1	1	AT1G03710.1	1	2	intron	AT1G03710.1	1	3	.
655	1	976991	977020	976992	977021	2	15	92	53	1.06851	AT	30			AT1G03850.1	1	AT1G03850.1	1	2	intron	AT1G03850.1	1	3	.
660	1	977570	977596	977571	977597	3	9	91	47	0.581349	ATG	27			AT1G03850.1	1	.		1	exon/DHS	AT1G03850.1	1	2	DHS
667	1	987455	987474	987456	987475	2	10	100	40	0.855577	AT	20			AT1G03880.1	1	AT1G03880.1	1	2	intron	AT1G03880.1	1	3	.
681	1	1021946	1021977	1021947	1021978	2	16	100	64	1.09435	CT	32			.		.		0	plus/minus 1kb	AT1G03980.1	1	1	.
733	1	1155405	1155429	1155406	1155430	3	8.3	90	43	0.438104	TAC	24.9			AT1G04310.1	1	.		1	exon	AT1G04310.1	1	2	.
734	1	1157598	1157617	1157599	1157618	3	6.7	100	40	0.303382	AGA	20.1			.		.		0	plus/minus 1kb	AT1G04310.1	1	1	.
735	1	1157765	1157797	1157766	1157798	2	16.5	93	59	1.08306	GA	33			.		.		0	DHS	AT1G04310.1	1	1	DHS
740	1	1166696	1166715	1166697	1166716	2	10	100	40	0.855577	GT	20			.		.		0	plus/minus 1kb	AT1G04360.1	1	1	.
846	1	1300118	1300149	1300119	1300150	2	16	100	64	1.09435	AT	32			.		.		0	plus/minus 1kb	AT1G04660.1	1	1	.
867	1	1316584	1316604	1316585	1316605	3	7	100	42	0.37134	GTT	21			.		AT1G04700.1	1	1	intron	AT1G04700.1	1	2	.
875	1	1339379	1339414	1339380	1339415	2	18	100	72	1.04375	AT	36			.		.		0	DHS	AT1G04778.1	1	1	DHS
895	1	1365535	1365557	1365536	1365558	3	7.7	100	46	0.516554	CAT	23.1			AT1G04850.1	1	AT1G04850.1	1	2	intron	AT1G04840.1	1	3	.
966	1	1505770	1505791	1505771	1505792	3	7.3	100	44	0.435838	TCT	21.9			AT1G05200.1	1	.		1	exon	AT1G05200.1	1	2	.
1071	1	1643282	1643306	1643283	1643307	2	12.5	100	50	1.05197	TA	25			AT1G05550.1	1	AT1G05550.1	1	2	intron	AT1G05550.1	1	3	.
1088	1	1682215	1682237	1682216	1682238	3	7.7	100	46	0.516554	TTG	23.1			.		.		0	DHS	AT1G05620.1	1	1	DHS
1111	1	1720803	1720831	1720804	1720832	2	14.5	100	58	1.1022	TA	29			AT1G05740.1	1	AT1G05740.1	1	2	intron	AT1G05750.1	1	3	.
1153	1	1807621	1807643	1807622	1807644	2	11.5	100	46	0.993576	CT	23			.		.		0	DHS	AT1G05960.1	1	1	DHS
1175	1	1837560	1837595	1837561	1837596	3	12	93	65	0.968154	GAA	36			.		.		0	DHS	AT1G06070.1	1	1	DHS
1184	1	1862143	1862169	1862144	1862170	2	13.5	100	54	1.08711	AT	27			.		.		0	DHS	AT1G06135.1	1	1	DHS
1206	1	1891876	1891906	1891877	1891907	5	6.2	100	62	0.202968	AACTA	31			.		.		0	plus/minus 1kb	AT1G06190.1	1	1	.
1243	1	1959012	1959031	1959013	1959032	3	6.7	100	40	0.303382	GAA	20.1			AT1G06420.1	1	.		1	exon	AT1G06410.1	1	2	.
1251	1	1974280	1974299	1974281	1974300	2	10	100	40	0.855577	CT	20			.		.		0	DHS	AT1G06475.1	1	1	DHS
1298	1	2052087	2052108	2052088	2052109	3	7.3	100	44	0.435838	AAG	21.9			.		.		0	DHS	AT1G06700.1	1	1	DHS
1302	1	2055214	2055233	2055215	2055234	2	10	100	40	0.855577	AG	20			.		.		0	DHS	AT1G06700.1	1	1	DHS
1320	1	2105085	2105118	2105086	2105119	2	17	93	61	1.07967	AG	34			.		.		0	DHS	AT1G06850.1	1	1	DHS
1354	1	2156679	2156703	2156680	2156704	3	8.3	100	50	0.6266	AAG	24.9			.		.		0	plus/minus 1kb	AT1G07025.1	1	1	.
1360	1	2165086	2165112	2165087	2165113	3	8.7	92	47	0.548103	TCT	26.1			AT1G07050.1	1	.		1	exon	AT1G07050.1	1	2	.
1400	1	2248301	2248322	2248302	2248323	3	7.3	100	44	0.435838	GAG	21.9			AT1G07310.1	1	.		1	exon	AT1G07320.1	1	2	.
1415	1	2277940	2277973	2277943	2277976	2	17	93	61	1.07967	CT	34			AT1G07420.1	1	AT1G07420.1	1	2	intron	AT1G07420.2	1	3	.
1418	1	2286821	2286849	2286824	2286852	2	14.5	100	58	1.1022	AC	29			AT1G07440.1	1	AT1G07440.1	1	2	intron	AT1G07440.1	1	3	.
1424	1	2300939	2300958	2300942	2300961	3	6.7	100	40	0.303382	ATC	20.1			.		.		0	DHS	AT1G07490.1	1	1	DHS
1436	1	2315938	2315966	2315941	2315969	3	9.7	92	51	0.705979	TTG	29.1			AT1G07530.1	1	.		1	exon	AT1G07530.1	1	2	.
1453	1	2345612	2345632	2345615	2345635	3	7	100	42	0.37134	CTT	21			AT1G07620.1	1	.		1	exon	AT1G07620.1	1	2	.
1481	1	2392756	2392785	2392759	2392788	2	15	100	60	1.10325	CA	30			.		.		0	DHS	AT1G07720.1	1	1	DHS
1510	1	2482572	2482591	2482575	2482594	3	6.7	100	40	0.303382	GAT	20.1			AT1G07990.1	1	.		1	exon	AT1G07990.1	1	2	.
1591	1	2625560	2625595	2625563	2625598	3	12	100	72	1.04471	TGA	36			AT1G08320.1	1	AT1G08320.1	1	2	intron/DHS	AT1G08320.1	1	3	DHS
1606	1	2660240	2660273	2660243	2660276	2	17	93	61	1.07967	AT	34			AT1G08430.1	1	AT1G08430.1	1	2	intron	AT1G08430.1	1	3	.
1612	1	2668168	2668196	2668171	2668199	5	5.8	100	58	0.0979872	CAAAA	29			AT1G08450.1	1	AT1G08450.1	1	2	intron	AT1G08450.1	1	3	.
1617	1	2677547	2677570	2677550	2677573	2	12	90	41	0.895204	TC	24			AT1G08465.1	1	AT1G08465.1	1	2	intron	AT1G08465.1	1	3	.
1625	1	2691448	2691469	2691445	2691466	3	7.3	100	44	0.435838	TGG	21.9			.		.		0	plus/minus 1kb	AT1G08510.1	1	1	.
1661	1	2770966	2771004	2770963	2771001	3	13	100	78	1.09264	AAG	39			AT1G08700.1	1	AT1G08700.1	1	2	intron	AT1G08710.1	1	3	.
1665	1	2774055	2774078	2774052	2774075	3	8	100	48	0.573207	GAA	24			.		.		0	DHS	AT1G08720.1	1	1	DHS
1756	1	2989398	2989423	2989396	2989421	2	13	91	45	0.982079	GA	26			.		.		0	DHS	AT1G09250.1	1	1	DHS
1799	1	3059038	3059073	3059036	3059071	2	18.5	94	67	1.05165	TA	37			AT1G09480.1	1	AT1G09480.1	1	2	intron/DHS	AT1G09480.1	1	3	DHS
1830	1	3108175	3108202	3108173	3108200	2	14	100	56	1.09696	TC	28			.		.		0	plus/minus 1kb	AT1G09590.1	1	1	.
1840	1	3126273	3126293	3126271	3126291	3	7	100	42	0.37134	GGA	21			AT1G09650.1	1	.		1	exon	AT1G09650.1	1	2	.
1848	1	3140063	3140087	3140061	3140085	3	8.3	100	50	0.6266	GAA	24.9			AT1G09700.1	1	AT1G09700.1	1	2	intron	AT1G09700.1	1	3	.
1855	1	3146870	3146897	3146868	3146895	3	9.3	92	49	0.646654	ATC	27.9			AT1G09720.1	1	.		1	exon	AT1G09720.1	1	2	.
1859	1	3173632	3173661	3173630	3173659	3	10	92	53	0.747237	TCT	30			AT1G09795.1	1	.		1	exon	AT1G09795.1	1	2	.
1870	1	3212251	3212282	3212249	3212280	4	8	96	57	0.50558	AAGA	32			.		.		0	DHS	AT1G09880.1	1	1	DHS
1873	1	3218003	3218028	3218001	3218026	3	8.3	91	45	0.457624	TTC	24.9			.		.		0	DHS	AT1G09900.1	1	1	DHS
1888	1	3252283	3252336	3252281	3252334	2	28	92	98	0.864232	CT	56			.		.		0	DHS	AT1G09970.1	1	1	DHS
1914	1	3299757	3299777	3299755	3299775	2	10.5	100	42	0.908802	AC	21			AT1G10095.1	1	AT1G10095.1	1	2	intron	AT1G10095.1	1	3	.
1937	1	3347450	3347475	3347448	3347473	3	8.7	100	52	0.692832	AAG	26.1			AT1G10200.1	1	AT1G10200.1	1	2	intron	AT1G10200.1	1	3	.
1984	1	3405680	3405707	3405679	3405706	3	9	92	49	0.598838	TGA	27			AT1G10385.1	1	AT1G10385.1	1	2	intron	AT1G10385.1	1	3	.
1999	1	3419628	3419652	3419627	3419651	3	8.3	90	43	0.438104	GAA	24.9			.		.		0	DHS	AT1G10410.1	1	1	DHS
2054	1	3527237	3527273	3527236	3527272	2	18.5	100	74	1.02652	AT	37			.		.		0	DHS	AT1G10652.1	1	1	DHS
2082	1	3551749	3551772	3551748	3551771	2	12	100	48	1.02588	AT	24			.		.		0		.			.
2092	1	3564262	3564288	3564261	3564287	3	9	91	40	0.581349	GAT	27			AT1G10720.1	1	.		1	exon	AT1G10720.1	1	2	.
2114	1	3612233	3612257	3612232	3612256	3	8.3	90	43	0.438104	CTT	24.9			AT1G10850.1	1	.		1	exon	AT1G10850.1	1	2	.
2169	1	3723002	3723029	3723002	3723029	3	9.3	100	56	0.78188	CTT	27.9			.		.		0	plus/minus 1kb	AT1G11130.1	1	1	.
2211	1	3776995	3777031	3776995	3777031	2	18.5	100	74	1.02652	TA	37			.		.		0	plus/minus 1kb	AT1G11260.1	1	1	.
2296	1	3878559	3878586	3878559	3878586	4	7	91	42	0.217201	TAAA	28			.		.		0	plus/minus 1kb	AT1G11545.1	1	1	.
2352	1	3960486	3960517	3960486	3960517	2	16	100	64	1.09435	AT	32			.		.		0	DHS	AT1G11730.1	1	1	DHS
2362	1	3988807	3988833	3988808	3988834	3	9	100	54	0.738874	AAC	27			.		.		0	plus/minus 1kb	AT1G11810.1	1	1	.
2374	1	4015265	4015321	4015266	4015322	2	29	96	109	0.848089	TC	58			AT1G11905.1	1	AT1G11905.1	1	2	intron	AT1G11900.1	1	3	.
2383	1	4049208	4049231	4049210	4049233	2	12	100	48	1.02588	GA	24			.		.		0	DHS	AT1G12000.1	1	1	DHS
2403	1	4079623	4079652	4079625	4079654	2	15	100	60	1.10325	AT	30			AT1G12070.1	1	AT1G12070.1	1	2	intron	AT1G12070.1	1	3	.
2407	1	4081647	4081724	4081649	4081726	3	26	97	149	0.846337	TTA	78	NC_551_TTA		.		.		0		.			.
2479	1	4139879	4139901	4139881	4139903	2	11.5	100	46	0.993576	TA	23			.		.		0	DHS	AT1G12200.1	1	1	DHS
2496	1	4173442	4173467	4173444	4173469	2	13	100	52	1.07224	TG	26			AT1G12270.1	1	AT1G12270.1	1	2	intron	AT1G12270.1	1	3	.
2503	1	4196768	4196787	4196770	4196789	3	6.7	100	40	0.303382	GTT	20.1	HS_261_GTT_unk		.		.		0	DHS	AT1G12340.1	1	1	DHS
2538	1	4261054	4261093	4261056	4261095	6	6.7	94	73	0.236766	GGAGAA	40.2			AT1G12490.1	1	.		1	exon	AT1G12490.1	1	2	.
2539	1	4261710	4261729	4261712	4261731	3	6.7	100	40	0.303382	AGA	20.1			AT1G12490.1	1	.		1	exon	AT1G12490.1	1	2	.
2583	1	4329218	4329276	4329220	4329278	2	29.5	92	104	0.871698	TA	59			.		.		0	DHS	AT1G12710.1	1	1	DHS
2629	1	4385022	4385051	4385024	4385053	3	10	92	53	0.747237	ACA	30			AT1G12860.1	1	.		1	exon	AT1G12860.1	1	2	.
2654	1	4413187	4413226	4413189	4413228	2	20	92	66	1.02385	AT	40			.		.		0	DHS	AT1G12938.1	1	1	DHS
2677	1	4446402	4446422	4446404	4446424	3	7	100	42	0.37134	TTC	21			AT1G13030.1	1	.		1	exon	AT1G13030.1	1	2	.
2738	1	4546301	4546377	4546304	4546380	3	26	97	149	0.846337	TTC	78	IN_431_TTC_map1b		AT1G13270.2	1	AT1G13270.2	1	2	intron	AT1G13270.2	1	3	.
2751	1	4556804	4556871	4556807	4556874	2	34	100	136	1.15025	TA	68			.		.		0	DHS	AT1G13300.1	1	1	DHS
2759	1	4568414	4568448	4568417	4568451	2	17.5	100	70	1.05953	TA	35			AT1G13330.1	1	AT1G13330.1	1	2	intron	AT1G13330.1	1	3	.
2788	1	4604897	4604924	4604900	4604927	3	9	96	49	0.662041	GAA	27			AT1G13420.1	1	.		1	exon	AT1G13420.1	1	2	.
2789	1	4606560	4606583	4606563	4606586	3	8	100	48	0.573207	GAA	24			AT1G13430.1	1	.		1	exon	AT1G13430.1	1	2	.
2790	1	4606937	4606960	4606940	4606963	3	8	100	48	0.573207	ATC	24			AT1G13430.1	1	.		1	exon	AT1G13430.1	1	2	.
2810	1	4653362	4653388	4653365	4653391	3	8.7	92	47	0.548103	ATA	26.1			.		.		0		.			.
2844	1	4691719	4691747	4691722	4691750	2	14.5	92	51	1.05688	GT	29			AT1G13680.1	1	AT1G13680.1	1	2	intron/DHS	AT1G13680.1	1	3	DHS
2845	1	4692766	4692787	4692769	4692790	2	11	100	44	0.954678	AT	22			.		.		0	plus/minus 1kb	AT1G13680.1	1	1	.
2896	1	4776839	4776863	4776842	4776866	3	8.3	90	43	0.438104	CTG	24.9			AT1G13960.1	1	.		1	exon	AT1G13960.1	1	2	.
2912	1	4807855	4807909	4807858	4807912	3	18.3	100	110	1.06011	ACA	54.9			.		.		0	plus/minus 1kb	AT1G14030.1	1	1	.
2950	1	4892053	4892077	4892058	4892082	3	8.3	100	50	0.6266	ATA	24.9			.		.		0	DHS	AT1G14330.1	1	1	DHS
3007	1	4989579	4989599	4989584	4989604	2	10.5	100	42	0.908802	AG	21			.		.		0	DHS	AT1G14580.1	1	1	DHS
3035	1	5043537	5043558	5043542	5043563	3	7.3	100	44	0.435838	AAC	21.9			AT1G14685.3	1	.		1	exon	AT1G14685.3	1	2	.
3058	1	5068576	5068597	5068581	5068602	2	11	100	44	0.954678	AG	22			.		.		0	DHS	AT1G14720.1	1	1	DHS
3077	1	5087960	5087986	5087965	5087991	3	9	91	47	0.581349	CTA	27			AT1G14770.1	1	AT1G14770.1	1	2	intron	AT1G14770.1	1	3	.
3118	1	5149419	5149440	5149424	5149445	3	7.3	100	44	0.435838	ATC	21.9			AT1G14920.1	1	.		1	exon	AT1G14920.1	1	2	.
3122	1	5160661	5160691	5160666	5160696	2	16	93	57	1.08355	AT	32			.		.		0	DHS	AT1G14960.1	1	1	DHS
3140	1	5194168	5194214	5194173	5194219	3	15.3	97	87	1.11332	TTC	45.9			.		.		0	DHS	AT1G15100.1	1	1	DHS
3146	1	5199095	5199134	5199100	5199139	2	20	100	80	0.969646	CT	40			.		.		0	DHS	AT1G15110.1	1	1	DHS
3176	1	5268809	5268843	5268814	5268848	4	9.2	90	46	0.630275	TATA	36.8			.		.		0	DHS	AT1G15310.1	1	1	DHS
3198	1	5283904	5283926	5283909	5283931	2	11.5	100	46	0.993576	TA	23			AT1G15360.1	1	AT1G15360.1	1	2	intron	AT1G15360.1	1	3	.
3265	1	5405540	5405572	5405545	5405577	3	11	100	66	0.971797	ATC	33			AT1G15710.1	1	.		1	exon	AT1G15710.1	1	2	.
3270	1	5420968	5421000	5420973	5421005	4	8.8	93	49	0.608619	TCTC	35.2			.		.		0	DHS	AT1G15750.1	1	1	DHS
3281	1	5431280	5431307	5431285	5431312	2	14	92	49	1.04094	GT	28			AT1G15780.1	1	AT1G15780.1	1	2	intron	AT1G15780.1	1	3	.
3327	1	5481842	5481861	5481848	5481867	3	6.7	100	40	0.303382	CTC	20.1			AT1G15950.1	1	AT1G15950.2	1	2	intron	AT1G15960.1	1	3	.
3332	1	5508529	5508554	5508535	5508560	3	8.7	91	45	0.530293	TTC	26.1			.		.		0	DHS	AT1G16060.2	1	1	DHS
3336	1	5534708	5534748	5534714	5534754	3	13.7	94	75	1.07122	ATG	41.1			AT1G16150.1	1	.		1	exon	AT1G16150.1	1	2	.
3345	1	5562075	5562098	5562081	5562104	2	12	90	41	0.895204	CT	24			.		.		0	DHS	AT1G16260.1	1	1	DHS
3347	1	5563853	5563882	5563859	5563888	3	10	100	60	0.870827	TGT	30			.		.		0	plus/minus 1kb	AT1G16270.1	1	1	.
3362	1	5609864	5609886	5609870	5609892	2	11.5	100	46	0.993576	AT	23			AT1G16410.2	1	AT1G16410.2	1	2	intron	AT1G16410.2	1	3	.
3377	1	5637061	5637084	5637068	5637091	3	8.3	90	43	0.438104	TAA	24.9			.		.		0		.			.
3384	1	5639482	5639513	5639489	5639520	3	11	90	52	0.835069	TCA	33			AT1G16500.1	1	.		1	exon	AT1G16500.1	1	2	.
3554	1	5894755	5894780	5894762	5894787	2	13	91	45	0.982079	AC	26			AT1G17230.1	1	AT1G17230.1	1	2	intron	AT1G17230.1	1	3	.
3619	1	5987675	5987705	5987682	5987712	3	10.3	100	62	0.904241	GAA	30.9			.		.		0	DHS	AT1G17440.1	1	1	DHS
3636	1	6032446	6032466	6032453	6032473	3	7	100	42	0.37134	ATG	21			AT1G17540.1	1	AT1G17540.1	1	2	intron	AT1G17545.1	1	3	.
3664	1	6098269	6098300	6098276	6098307	2	16	100	64	1.09435	CT	32			.		.		0	DHS	AT1G17730.1	1	1	DHS
3692	1	6163660	6163679	6163667	6163686	2	10	100	40	0.855577	CA	20			AT1G17920.1	1	AT1G17920.1	1	2	intron	AT1G17920.1	1	3	.
3781	1	6247493	6247520	6247500	6247527	3	9.3	100	56	0.78188	GAA	27.9			AT1G18150.2	1	.		1	exon	AT1G18150.2	1	2	.
3806	1	6282878	6282910	6282885	6282917	3	11	100	66	0.971797	TTG	33			AT1G18265.1	1	.		1	exon	AT1G18260.1	1	2	.
3809	1	6287151	6287172	6287158	6287179	2	11	100	44	0.954678	AC	22			AT1G18270.1	1	AT1G18270.1	1	2	intron	AT1G18270.1	1	3	.
3884	1	6414040	6414062	6414048	6414070	3	7.7	100	46	0.516554	GAA	23.1			AT1G18620.1	1	.		1	exon	AT1G18620.1	1	2	.
3950	1	6469516	6469546	6469525	6469555	3	10.3	92	48	0.785797	ATC	30.9			AT1G18750.1	1	.		1	exon	AT1G18750.1	1	2	.
3968	1	6486568	6486619	6486577	6486628	6	8.7	93	76	0.637696	GGATTA	52.2			AT1G18810.1	1	.		1	exon	AT1G18810.1	1	2	.
4021	1	6550983	6551011	6550992	6551020	3	9.7	92	51	0.705979	GAA	29.1			AT1G18950.1	1	.		1	exon	AT1G18950.1	1	2	.
4060	1	6606707	6606730	6606716	6606739	3	7.7	95	41	0.409266	AAG	23.1			AT1G19115.1	1	.		1	exon	AT1G19115.1	1	2	.
4165	1	6753405	6753428	6753414	6753437	3	8	90	41	0.379879	CTT	24			AT1G19490.1	1	.		1	exon	AT1G19490.1	1	2	.
4175	1	6764188	6764212	6764197	6764221	3	8	91	43	0.399598	GAA	24			AT1G19530.1	1	.		1	exon	AT1G19530.1	1	2	.
4208	1	6834113	6834132	6834122	6834141	3	6.7	100	40	0.303382	TTC	20.1			AT1G19780.1	1	.		1	exon/DHS	AT1G19780.1	1	2	DHS
4232	1	6898544	6898574	6898553	6898583	3	10.3	100	62	0.904241	AAG	30.9			.		.		0	DHS	AT1G19870.1	1	1	DHS
4266	1	6947350	6947395	6947359	6947404	4	11.5	92	71	0.941077	ATAT	46			.		.		0	plus/minus 1kb	AT1G20030.2	1	1	.
4269	1	6951443	6951505	6951452	6951514	2	31.5	100	126	0.96373	GA	63			AT1G20060.1	1	AT1G20060.1	1	2	intron	AT1G20060.1	1	3	.
4362	1	7080795	7080816	7080805	7080826	2	11	100	44	0.954678	AT	22			AT1G20410.1	1	AT1G20410.1	1	2	intron	AT1G20410.1	1	3	.
4514	1	7301343	7301365	7301354	7301376	3	7.7	100	46	0.516554	AGA	23.1			.		.		0	DHS	AT1G20950.1	1	1	DHS
4522	1	7313995	7314028	7314006	7314039	3	10.3	90	40	0.752856	TTC	30.9			.		.		0	DHS	AT1G20970.1	1	1	DHS
4560	1	7374749	7374774	7374760	7374785	4	6.5	90	45	0.0792673	GTTT	26			AT1G21065.1	1	AT1G21065.1	1	2	intron	AT1G21065.1	1	3	.
4565	1	7382361	7382382	7382372	7382393	3	7.3	100	44	0.435838	GAG	21.9			.		.		0	DHS	AT1G21080.1	1	1	DHS
4630	1	7469231	7469258	7469243	7469270	3	9.3	92	49	0.646654	TGA	27.9			AT1G21326.1	1	.		1	exon	AT1G21326.1	1	2	.
4641	1	7490049	7490072	7490060	7490083	3	8	90	41	0.379879	CTT	24			AT1G21390.1	1	.		1	exon	AT1G21390.1	1	2	.
4684	1	7555379	7555405	7555390	7555416	3	9	91	47	0.581349	TGA	27			.		.		0	plus/minus 1kb	AT1G21560.1	1	1	.
4702	1	7599732	7599770	7599743	7599781	2	19.5	94	71	1.02508	AC	39			AT1G21650.1	1	AT1G21650.1	1	2	intron/DHS	AT1G21650.1	1	3	DHS
4709	1	7620352	7620394	7620363	7620405	3	14.3	95	79	1.0943	TTG	42.9	CD_11		AT1G21700.1	1	.		1	exon	AT1G21700.1	1	2	.
4736	1	7661669	7661692	7661680	7661703	3	8.3	90	43	0.438104	TTG	24.9			AT1G21830.1	1	.		1	exon/DHS	AT1G21830.1	1	2	DHS	1
4770	1	7705993	7706017	7706004	7706028	2	12.5	91	43	0.949864	AG	25			.		.		0	DHS	AT1G21920.1	1	1	DHS
4806	1	7728947	7728967	7728958	7728978	2	10.5	100	42	0.908802	AT	21			AT1G21970.1	1	AT1G21970.1	1	2	intron	AT1G21970.1	1	3	.
4809	1	7735053	7735078	7735064	7735089	3	8.7	91	45	0.530293	AGA	26.1			AT1G21980.1	1	.		1	exon	AT1G21980.1	1	2	.
4821	1	7753183	7753203	7753194	7753214	3	7	100	42	0.37134	CAA	21			AT1G22015.1	1	AT1G22015.1	1	2	intron	AT1G22015.1	1	3	.
4854	1	7803763	7803790	7803774	7803801	3	9.3	100	56	0.78188	ATC	27.9	NC_561_ATC		.		.		0	DHS/non gene	.			DHS
4874	1	7822625	7822682	7822636	7822693	8	7	92	102	0.334563	TTTATTTT	56			.		.		0	plus/minus 1kb	AT1G22160.1	1	1	.
4906	1	7858473	7858498	7858484	7858509	3	8.3	91	45	0.457624	CAT	24.9			.		.		0	plus/minus 1kb	AT1G22250.1	1	1	.
4913	1	7873910	7873930	7873921	7873941	2	10.5	100	42	0.908802	AT	21			.		.		0	DHS	AT1G22280.2	1	1	DHS
4987	1	7964657	7964715	7964668	7964726	2	29.5	100	118	0.865772	CT	59			AT1G22540.1	1	AT1G22540.1	1	2	intron	AT1G22540.1	1	3	.
5016	1	7987634	7987675	7987645	7987686	2	21	95	77	0.970406	AT	42			AT1G22600.1	1	AT1G22600.1	1	2	intron	AT1G22600.1	1	3	.
5069	1	8074986	8075008	8074997	8075019	3	7.7	100	46	0.516554	GAA	23.1			.		.		0	DHS	AT1G22800.1	1	1	DHS
5102	1	8147289	8147316	8147300	8147327	2	14	100	56	1.09696	AC	28			.		.		0	DHS	AT1G23010.1	1	1	DHS
5122	1	8166984	8167010	8166995	8167021	3	9	100	54	0.738874	ATT	27	NC_571_ATT		.		.		0	DHS/non gene	.			DHS
5160	1	8201000	8201026	8201011	8201037	4	6.8	91	47	0.169767	TATC	27.2			.		.		0	plus/minus 1kb	AT1G23130.1	1	1	.
5175	1	8232910	8232935	8232921	8232946	2	13	91	45	0.982079	TA	26			.		.		0		.			.
5262	1	8321676	8321698	8321687	8321709	3	7.7	100	46	0.516554	ACA	23.1			.		.		0	DHS	AT1G23440.2	1	1	DHS
5263	1	8322333	8322379	8322344	8322390	2	23.5	100	94	0.847814	AT	47			AT1G23440.1	1	AT1G23440.1	1	2	intron	AT1G23440.2	1	3	.
5345	1	8460886	8460915	8460897	8460926	3	10	100	60	0.870827	ATC	30			.		.		0		.			.
5371	1	8484927	8484946	8484938	8484957	3	6.7	100	40	0.303382	AAG	20.1			AT1G23980.1	1	.		1	exon	AT1G23980.1	1	2	.
5427	1	8541154	8541187	8541165	8541198	4	8.5	90	54	0.511214	TATA	34			AT1G24145.1	1	AT1G24145.1	1	2	intron	AT1G24145.1	1	3	.
5442	1	8558770	8558801	8558781	8558812	3	10.7	93	57	0.846978	AAG	32.1			.		.		0	DHS	AT1G24170.1	1	1	DHS
5472	1	8595937	8595973	8595948	8595984	4	9.2	90	60	0.630275	TCTT	36.8			.		.		0	DHS	AT1G24260.1	1	1	DHS
5520	1	8655320	8655351	8655331	8655362	3	10.3	93	57	0.800316	AAG	30.9			AT1G24405.1	1	.		1	exon	AT1G24405.1	1	2	.
5535	1	8674461	8674485	8674473	8674497	2	12.5	100	50	1.05197	TG	25			AT1G24470.1	1	AT1G24470.1	1	2	intron	AT1G24470.1	1	3	.
5572	1	8726894	8726918	8726908	8726932	2	12.5	91	43	0.949864	AG	25			.		AT1G24625.1	1	1	intron	AT1G24625.1	1	2	.
5573	1	8727138	8727170	8727152	8727184	2	16.5	100	66	1.08521	GA	33			.		.		0	DHS	AT1G24625.1	1	1	DHS
5578	1	8738769	8738790	8738783	8738804	3	7.3	100	44	0.435838	AAG	21.9	NC_581_AAG		.		.		0		.			.
5590	1	8757938	8757960	8757952	8757974	2	11.5	100	46	0.993576	GA	23			.		.		0	plus/minus 1kb	AT1G24735.1	1	1	.
5601	1	8775921	8775940	8775934	8775953	2	10	100	40	0.855577	TC	20			AT1G24822.1	1	AT1G24822.1	1	2	intron	AT1G24822.1	1	3	.
5624	1	8798449	8798468	8798462	8798481	2	10	100	40	0.855577	TC	20			.		.		0		.			.
5673	1	8845191	8845211	8845204	8845224	3	7	100	42	0.37134	AGG	21			.		.		0	plus/minus 1kb	AT1G25240.1	1	1	.
5675	1	8853334	8853360	8853347	8853373	2	13.5	100	54	1.08711	TA	27			.		.		0	plus/minus 1kb	AT1G25260.1	1	1	.
5709	1	8882532	8882563	8882545	8882576	3	10.7	100	64	0.944588	TTA	32.1			.		.		0	plus/minus 1kb	AT1G25330.1	1	1	.
5717	1	8897903	8897925	8897916	8897938	3	7.7	100	46	0.516554	TCA	23.1			.		.		0	plus/minus 1kb	AT1G25370.1	1	1	.
5747	1	8957983	8958006	8957996	8958019	3	8	90	41	0.379879	TTC	24			.		.		0	DHS	AT1G25500.1	1	1	DHS
5787	1	9015857	9015881	9015870	9015894	3	8.3	90	43	0.438104	CAT	24.9			.		.		0	plus/minus 1kb	AT1G25988.1	1	1	.
5791	1	9023708	9023761	9023721	9023774	2	27	96	101	0.831406	AG	54			AT1G26100.1	1	AT1G26100.1	1	2	intron	AT1G26100.1	1	3	.
5792	1	9023877	9023905	9023890	9023918	2	14.5	92	51	1.05688	AG	29			AT1G26100.1	1	AT1G26100.1	1	2	intron/DHS	AT1G26100.1	1	3	DHS
5794	1	9027673	9027698	9027686	9027711	2	13	100	52	1.07224	GA	26			.		.		0	DHS	AT1G26120.1	1	1	DHS
5857	1	9129572	9129624	9129585	9129637	2	27	96	101	0.831406	AT	54			.		.		0	plus/minus 1kb	AT1G26390.1	1	1	.
5863	1	9144881	9144907	9144894	9144920	3	9	91	47	0.581349	TCT	27			AT1G26440.3	1	AT1G26440.1	1	2	intron	AT1G26440.3	1	3	.
6008	1	9316563	9316583	9316576	9316596	3	7	100	42	0.37134	GAA	21			AT1G26880.1	1	AT1G26880.1	1	2	intron	AT1G26880.1	1	3	.
6016	1	9321626	9321664	9321639	9321677	3	13	100	78	1.09264	TTC	39	HS_271_TTC_rpl10b		.		.		0	DHS	AT1G26900.1	1	1	DHS
6034	1	9341462	9341498	9341475	9341511	2	18.5	100	74	1.02652	AT	37			.		.		0		.			.
6095	1	9408620	9408640	9408633	9408653	3	7	100	42	0.37134	AAG	21			AT1G27100.1	1	AT1G27100.1	1	2	intron/DHS	AT1G27100.1	1	3	DHS
6123	1	9440784	9440812	9440797	9440825	2	14.5	92	51	1.05688	AT	29			AT1G27180.1	1	AT1G27180.1	1	2	intron/DHS	AT1G27180.1	1	3	DHS
6144	1	9483764	9483788	9483777	9483801	3	8.3	90	43	0.438104	AGA	24.9			AT1G27300.1	1	.		1	exon	AT1G27300.1	1	2	.
6145	1	9487169	9487202	9487182	9487215	3	11.3	93	47	0.908504	TTC	33.9			.		.		0	plus/minus 1kb	AT1G27320.1	1	1	.
6180	1	9556468	9556491	9556481	9556504	3	8	90	41	0.379879	TTC	24			AT1G27510.1	1	.		1	exon	AT1G27510.1	1	2	.
6204	1	9578123	9578170	9578136	9578183	2	24	95	89	0.881171	TA	48			AT1G27570.1	1	AT1G27570.1	1	2	intron	AT1G27570.1	1	3	.
6236	1	9622245	9622271	9622258	9622284	3	9.3	92	49	0.646654	ACA	27.9			AT1G27660.1	1	.		1	exon	AT1G27660.1	1	2	.
6238	1	9623092	9623119	9623105	9623132	2	14	100	56	1.09696	TA	28			AT1G27660.1	1	AT1G27660.1	1	2	intron	AT1G27660.1	1	3	.
6330	1	9756744	9756790	9756757	9756803	6	7.8	97	80	0.514264	CATCAA	46.8			AT1G28000.1	1	.		1	exon	AT1G28000.1	1	2	.
6339	1	9774365	9774389	9774378	9774402	3	8.3	100	50	0.6266	GAA	24.9			AT1G28040.1	1	AT1G28040.1	1	2	intron	AT1G28040.1	1	3	.
6396	1	9851846	9851867	9851859	9851880	3	7.3	100	44	0.435838	GAA	21.9			AT1G28200.1	1	AT1G28200.1	1	2	intron	AT1G28200.1	1	3	.
6431	1	9887403	9887451	9887416	9887464	2	24.5	100	98	0.825576	AG	49			.		.		0	DHS	AT1G28280.1	1	1	DHS
6456	1	9899834	9899861	9899847	9899874	2	14	92	49	1.04094	GA	28			.		.		0	plus/minus 1kb	AT1G28300.1	1	1	.
6506	1	9969232	9969255	9969246	9969269	3	8	90	41	0.379879	TTC	24			.		.		0	DHS	AT1G28395.2	1	1	DHS
6518	1	9979666	9979685	9979680	9979699	3	6.7	100	40	0.303382	TAC	20.1			.		.		0	DHS	AT1G28420.1	1	1	DHS
6545	1	10019179	10019260	10019193	10019274	2	41.5	97	159	1.74341	TC	83			AT1G28500.1	1	AT1G28500.1	1	2	intron	AT1G28500.1	1	3	.
6582	1	10074567	10074594	10074581	10074608	3	9.7	92	51	0.705979	ATC	29.1			.		.		0	DHS	AT1G28670.1	1	1	DHS
6610	1	10114421	10114445	10114435	10114459	3	8.3	100	50	0.6266	ATG	24.9			.		.		0	plus/minus 1kb	AT1G29000.1	1	1	.
6686	1	10206592	10206617	10206606	10206631	3	8.3	91	45	0.457624	GAA	24.9			.		.		0		.			.
6770	1	10283031	10283051	10283045	10283065	2	10.5	100	42	0.908802	CT	21			.		.		0	plus/minus 1kb	AT1G29370.1	1	1	.
6782	1	10307918	10307951	10307932	10307965	3	11.3	100	68	0.996479	TAG	33.9			AT1G29460.1	1	.		1	exon	AT1G29460.1	1	2	.
6801	1	10327557	10327576	10327571	10327590	3	6.7	100	40	0.303382	TCA	20.1			AT1G29540.1	1	.		1	exon	AT1G29540.1	1	2	.
6815	1	10343677	10343700	10343691	10343714	3	8	100	48	0.573207	ATT	24			.		.		0	DHS	AT1G29600.1	1	1	DHS
6864	1	10468120	10468142	10468136	10468158	3	7.7	100	46	0.516554	AGA	23.1	HS_281_AGA_carb		.		.		0	DHS	AT1G29890.1	1	1	DHS
6882	1	10493959	10493981	10493975	10493997	3	7.7	100	46	0.516554	ACA	23.1			AT1G29950.1	1	.		1	exon	AT1G29960.1	1	2	.
6934	1	10543518	10543544	10543534	10543560	3	9.3	92	49	0.646654	CAA	27.9			AT1G30050.1	1	.		1	exon	AT1G30050.1	1	2	.
7044	1	10654318	10654349	10654334	10654365	2	16	100	64	1.09435	AT	32			.		.		0	DHS	AT1G30270.1	1	1	DHS
7048	1	10655833	10655927	10655849	10655943	3	32	97	185	0.973647	TTC	96	IN_441_TTC_cipk23		AT1G30270.1	1	AT1G30270.1	1	2	intron	AT1G30270.1	1	3	.
7071	1	10679215	10679234	10679233	10679252	3	6.7	100	40	0.303382	AAC	20.1	NC_591_AAC		.		.		0	DHS/non gene	.			DHS
7090	1	10701756	10701777	10701774	10701795	3	7.3	100	44	0.435838	AAT	21.9			.		.		0		.			.
7150	1	10817033	10817057	10817051	10817075	2	12.5	100	50	1.05197	AG	25			AT1G30540.1	1	AT1G30540.1	1	2	intron	AT1G30540.1	1	3	.
7168	1	10850124	10850147	10850142	10850165	2	12	100	48	1.02588	TG	24			AT1G30610.1	1	AT1G30610.1	1	2	intron	AT1G30610.1	1	3	.
7172	1	10860164	10860186	10860182	10860204	3	7.7	100	46	0.516554	CTT	23.1			.		.		0	DHS	AT1G30630.1	1	1	DHS
7346	1	11067181	11067249	11067200	11067268	2	34.5	100	138	1.19526	AT	69			.		.		0		.			.
7358	1	11087578	11087603	11087597	11087622	3	8.7	91	45	0.530293	TTC	26.1			AT1G31070.2	1	AT1G31070.1	1	2	intron	AT1G31070.2	1	3	.
7492	1	11221459	11221483	11221478	11221502	3	8.3	100	50	0.6266	AAT	24.9	HS_291_AAT_kuf-1		.		.		0	DHS	AT1G31350.1	1	1	DHS
7555	1	11316414	11316434	11316433	11316453	2	10.5	100	42	0.908802	GA	21			.		.		0	DHS	AT1G31620.1	1	1	DHS
7556	1	11318518	11318546	11318537	11318565	3	9.7	92	51	0.705979	GGT	29.1			AT1G31630.1	1	.		1	exon	AT1G31620.1	1	2	.
7564	1	11322699	11322719	11322718	11322738	3	7	100	42	0.37134	TGG	21			AT1G31640.1	1	.		1	exon	AT1G31640.1	1	2	.
7618	1	11403484	11403511	11403503	11403530	3	9.3	92	49	0.646654	AGG	27.9			AT1G31810.1	1	.		1	exon	AT1G31810.1	1	2	.
7653	1	11437310	11437341	11437330	11437361	3	10.7	93	57	0.846978	AGA	32.1			AT1G31870.1	1	.		1	exon	AT1G31870.1	1	2	.
7959	1	11673045	11673067	11673065	11673087	3	7.7	100	46	0.516554	TCA	23.1			.		.		0	plus/minus 1kb	AT1G32360.1	1	1	.
7966	1	11675254	11675278	11675274	11675298	3	8	91	43	0.399598	TGT	24			.		.		0	plus/minus 1kb	AT1G32360.1	1	1	.
8067	1	11762588	11762609	11762608	11762629	2	11	100	44	0.954678	GA	22			.		.		0	DHS	AT1G32530.1	1	1	DHS
8109	1	11784663	11784687	11784683	11784707	3	8.3	100	50	0.6266	TTG	24.9			AT1G32580.1	1	AT1G32580.1	1	2	intron	AT1G32580.1	1	3	.
8114	1	11798097	11798118	11798117	11798138	3	7.3	100	44	0.435838	AAG	21.9			AT1G32630.1	1	.		1	exon	AT1G32630.1	1	2	.
8208	1	11877292	11877324	11877312	11877344	3	10	93	45	0.762233	GAA	30			.		.		0	DHS	AT1G32790.1	1	1	DHS
8217	1	11885731	11885753	11885751	11885773	3	7.7	100	46	0.516554	GAA	23.1			AT1G32810.2	1	.		1	exon	AT1G32810.2	1	2	.
8366	1	11996644	11996665	11996664	11996685	3	7.3	100	44	0.435838	TTG	21.9			.		.		0	plus/minus 1kb	AT1G33100.1	1	1	.
8420	1	12030131	12030153	12030151	12030173	3	7.7	100	46	0.516554	TGT	23.1			AT1G33170.1	1	AT1G33170.1	1	2	intron	AT1G33170.1	1	3	.
8469	1	12081691	12081711	12081711	12081731	2	10.5	100	42	0.908802	TG	21			AT1G33320.1	1	AT1G33320.1	1	2	intron	AT1G33320.1	1	3	.
8475	1	12091692	12091801	12091712	12091821	2	55.5	98	215	2.90557	AG	111			.		.		0	plus/minus 1kb	AT1G33360.1	1	1	.
8489	1	12128602	12128624	12128622	12128644	4	5.8	100	46	0.0870131	AGTT	23.2			AT1G33440.1	1	AT1G33440.1	1	2	intron	AT1G33440.1	1	3	.
8745	1	12355741	12355764	12355761	12355784	2	12	100	48	1.02588	CT	24			.		.		0	plus/minus 1kb	AT1G33990.1	1	1	.
8749	1	12361130	12361149	12361150	12361169	2	10	100	40	0.855577	GA	20			.		.		0	plus/minus 1kb	AT1G34010.1	1	1	.
8820	1	12412367	12412391	12412389	12412413	3	8.3	90	43	0.438104	TTC	24.9			AT1G34095.1	1	AT1G34095.1	1	2	intron	AT1G34095.1	1	3	.
8893	1	12485493	12485529	12485515	12485551	3	12.3	100	74	1.06157	TCT	36.9			.		.		0	plus/minus 1kb	AT1G34260.1	1	1	.
8921	1	12503384	12503411	12503406	12503433	3	8.7	92	42	0.548103	AGA	26.1			.		.		0	DHS	AT1G34300.1	1	1	DHS
9041	1	12589660	12589679	12589682	12589701	3	6.7	100	40	0.303382	CAC	20.1			AT1G34430.1	1	.		1	exon	AT1G34430.1	1	2	.
9042	1	12590089	12590112	12590111	12590134	2	12	90	41	0.895204	GA	24			.		.		0	DHS	AT1G34430.1	1	1	DHS
9046	1	12593333	12593363	12593355	12593385	2	15.5	100	62	1.10049	AG	31			.		.		0	plus/minus 1kb	AT1G34440.1	1	1	.
9230	1	12733325	12733385	12733347	12733407	2	30.5	100	122	0.908784	TC	61			.		.		0		.			.
9267	1	12764520	12764570	12764542	12764592	2	25.5	91	88	0.897993	AT	51			AT1G34790.1	1	AT1G34790.1	1	2	intron	AT1G34790.1	1	3	.
9709	1	13102810	13102923	13102832	13102945	2	57	100	228	3.34746	GA	114			.		.		0		.			.
9885	1	13231139	13231160	13229927	13229948	2	11	100	44	0.954678	GA	22			.		.		0	plus/minus 1kb	AT1G35730.1	1	1	.
10138	1	13451464	13451493	13450252	13450281	3	10	100	60	0.870827	GAA	30			.		.		0	DHS	AT1G36050.1	1	1	DHS
10170	1	13467623	13467662	13466411	13466450	2	20	100	80	0.969646	TA	40			.		.		0	plus/minus 1kb	AT1G36070.1	1	1	.
10200	1	13484952	13484975	13483740	13483763	3	8	100	48	0.573207	GAT	24			.		.		0		.			.
10360	1	13580027	13580053	13578815	13578841	4	6.8	91	40	0.169767	TATA	27.2			.		.		0		.			.
10688	1	13852250	13852311	13851038	13851099	2	31	100	124	0.934784	TC	62			.		.		0		.			.
10873	1	13962882	13962924	13961670	13961712	3	14.3	95	79	1.0943	TTC	42.9			.		.		0		.			.
10969	1	14030162	14030181	14027721	14027740	2	10	100	40	0.855577	GA	20			AT1G36990.1	1	AT1G36990.1	1	2	intron	AT1G36990.1	1	3	.
11277	1	14269026	14269052	14266585	14266611	2	14	92	49	1.04094	CA	28			.		.		0		.			.
12600	1	15307692	15307738	15305251	15305297	3	15.7	100	94	1.12235	TTC	47.1			.		.		0		.			.
12922	1	15405774	15405820	15403333	15403379	3	15.7	100	94	1.12235	TTC	47.1			.		.		0		.			.
13246	1	15643926	15643970	15641485	15641529	3	15	100	90	1.12635	AAT	45		intergenic	.		.		0		.			.
13257	1	15648306	15648371	15645865	15645930	2	33	100	132	1.06762	AG	66			.		.		0		.			.
13435	1	15795911	15795938	15793470	15793497	3	9.3	92	49	0.646654	AAT	27.9			.		.		0		.			.
13440	1	15797517	15797565	15795076	15795124	3	16.7	95	93	1.10318	TAA	50.1			.		.		0		.			.
13585	1	15896197	15896244	15893756	15893803	3	16	100	96	1.11862	CTT	48	IN_451_CTT_unk		AT1G42430.1	1	AT1G42430.1	1	2	intron	AT1G42430.1	1	3	.
13692	1	15967889	15967912	15965449	15965472	3	8	90	41	0.379879	ATT	24			.		.		0		.			.
13704	1	15976242	15976271	15973802	15973831	4	7.5	100	60	0.488377	TTTG	30			AT1G42540.1	1	AT1G42540.1	1	2	intron	AT1G42540.1	1	3	.
13705	1	15979549	15979568	15977109	15977128	3	6.7	100	40	0.303382	CTT	20.1			.		.		0	DHS	AT1G42540.1	1	1	DHS
13716	1	15985377	15985416	15982937	15982976	2	20	100	80	0.969646	AT	40			AT1G42560.1	1	AT1G42560.1	1	2	intron	AT1G42560.1	1	3	.
13972	1	16164055	16164121	16161615	16161681	2	33	96	127	0.994741	AT	66			.		.		0		.			.
14102	1	16265548	16265594	16263108	16263154	2	23.5	100	94	0.847814	TA	47			.		.		0	DHS	AT1G43160.1	1	1	DHS
14368	1	16417831	16417850	16415391	16415410	3	6.7	100	40	0.303382	AGA	20.1			AT1G43600.1	1	.		1	exon	AT1G43600.1	1	2	.
14721	1	16623169	16623240	16620729	16620800	3	24	91	67	0.929864	GCA	72			AT1G43850.1	1	.		1	exon	AT1G43850.1	1	2	.
14795	1	16675997	16676141	16673557	16673701	2	73.5	97	280	2.6538	AG	147			AT1G43950.1	1	AT1G43950.1	1	2	intron	AT1G43950.1	1	3	.
14840	1	16720575	16720596	16718135	16718156	3	7.3	100	44	0.435838	CTC	21.9			AT1G44020.1	1	AT1G44020.1	1	2	intron	AT1G44020.1	1	3	.
15071	1	16870852	16870948	16868412	16868508	2	48.5	100	194	2.81059	CT	97			.		.		0		.			.
15249	1	16993503	16993523	16991063	16991083	3	7	100	42	0.37134	AGA	21			.		.		0		.			.
15353	1	17104334	17104413	17101894	17101973	3	26.3	92	141	0.873327	ATT	78.9			.		.		0	plus/minus 1kb	AT1G45180.1	1	1	.
15383	1	17121027	17121069	17118587	17118629	3	14.3	100	86	1.12285	TTG	42.9		intro, AT1G4519, BGLU1, beta glucosidase 1	AT1G45191.2	1	AT1G45191.2	1	2	intron	AT1G45191.2	1	3	.
15531	1	17248605	17248711	17246165	17246271	4	26.8	97	179	0.852771	ATAT	107.2			.		.		0		.			.
15746	1	17439287	17439308	17436847	17436868	3	7.3	100	44	0.435838	AGA	21.9			AT1G47510.1	1	AT1G47510.1	1	2	intron	AT1G47510.1	1	3	.
15994	1	17650538	17650557	17646869	17646888	3	6.7	100	40	0.303382	AAG	20.1			AT1G47890.1	1	.		1	exon	AT1G47900.1	1	2	.
16109	1	17770709	17770737	17767040	17767068	3	9.7	92	51	0.705979	TCC	29.1			AT1G48100.1	1	.		1	exon	AT1G48100.1	1	2	.
16130	1	17820976	17820997	17817308	17817329	2	11	100	44	0.954678	TA	22			.		.		0	DHS	AT1G48260.1	1	1	DHS
16194	1	17886543	17886672	17882875	17883004	3	43.3	98	253	2.06203	ATC	129.9	CD_21_ATC_Fbox	exon, AT1G48400	AT1G48400.1	1	.		1	3/UTR	AT1G48400.1	1	2	.
16201	1	17902215	17902234	17898547	17898566	3	6.7	100	40	0.303382	GAA	20.1			AT1G48420.1	1	AT1G48420.1	1	2	intron	AT1G48420.1	1	3	.
16238	1	17964486	17964507	17960818	17960839	3	7.3	100	44	0.435838	GAC	21.9			.		.		0	plus/minus 1kb	AT1G48580.1	1	1	.
16243	1	17969466	17969496	17965798	17965828	2	15.5	100	62	1.10049	CT	31			.		.		0	DHS	AT1G48598.1	1	1	DHS
16245	1	17979435	17979454	17975767	17975786	3	6.7	100	40	0.303382	AGG	20.1			AT1G48620.1	1	.		1	exon	AT1G48620.1	1	2	.
16305	1	18040410	18040441	18036742	18036773	3	10.7	93	57	0.846978	CTT	32.1			AT1G48760.1	1	.		1	exon	AT1G48760.1	1	2	.
16307	1	18043926	18043945	18040258	18040277	3	6.7	100	40	0.303382	GAA	20.1	HS_301_GAA_sh1		.		.		0	DHS	AT1G48760.1	1	1	DHS
16640	1	18377209	18377231	18373541	18373563	2	11.5	100	46	0.993576	AC	23			AT1G49630.1	1	AT1G49630.1	1	2	intron	AT1G49630.1	1	3	.
16646	1	18385179	18385198	18381511	18381530	3	6.7	100	40	0.303382	AAG	20.1			.		.		0	plus/minus 1kb	AT1G49670.1	1	1	.
16666	1	18411335	18411359	18407667	18407691	3	8	95	43	0.469246	CTT	24			.		.		0	plus/minus 1kb	AT1G49740.1	1	1	.
16741	1	18478541	18478608	18474873	18474940	3	22.7	90	115	0.975021	ATC	68.1			AT1G49900.1	1	.		1	exon	AT1G49900.1	1	2	.
16743	1	18479412	18479456	18475744	18475788	2	22.5	95	83	0.922389	AT	45			AT1G49900.1	1	AT1G49900.1	1	2	intron/DHS	AT1G49900.1	1	3	DHS
16760	1	18492753	18492796	18489085	18489128	2	22	100	88	0.894085	AT	44			AT1G49940.1	1	AT1G49940.1	1	2	intron	AT1G49940.1	1	3	.
16782	1	18540869	18540891	18537201	18537223	4	5.8	100	46	0.0870131	AAAT	23.2			AT1G50030.1	1	AT1G50030.1	1	2	intron	AT1G50030.1	1	3	.
16815	1	18580972	18580994	18577304	18577326	2	11.5	100	46	0.993576	AT	23			AT1G50140.1	1	AT1G50140.1	1	2	intron	AT1G50140.1	1	3	.
16893	1	18675671	18675692	18672003	18672024	2	11	100	44	0.954678	AT	22			.		.		0	DHS	AT1G50410.1	1	1	DHS
16894	1	18680302	18680331	18676634	18676663	3	10	100	60	0.870827	ATG	30			AT1G50410.1	1	.		1	exon	AT1G50410.1	1	2	.
16984	1	18783498	18783518	18779830	18779850	3	7	100	42	0.37134	GGA	21			AT1G50690.1	1	.		1	exon	AT1G50690.1	1	2	.
17029	1	18826269	18826298	18822601	18822630	3	10	100	60	0.870827	TCT	30			AT1G50780.1	1	.		1	exon	AT1G50780.1	1	2	.
17063	1	18853623	18853646	18849955	18849978	3	8	90	41	0.379879	GAA	24			.		.		0		.			.
17128	1	18937176	18937213	18933508	18933545	6	6.3	93	62	0.127423	GCCCCA	37.8			AT1G51090.1	1	.		1	exon/DHS	AT1G51090.1	1	2	DHS
17213	1	19033221	19033246	19029553	19029578	2	13	100	52	1.07224	AT	26			AT1G51330.1	1	AT1G51330.1	1	2	intron	AT1G51330.1	1	3	.
17270	1	19084283	19084307	19080615	19080639	2	12.5	100	50	1.05197	TA	25			AT1G51460.1	1	AT1G51460.1	1	2	intron	AT1G51460.1	1	3	.
17285	1	19104683	19104706	19101015	19101038	2	12	90	41	0.895204	AG	24			.		.		0	DHS	AT1G51500.1	1	1	DHS
17293	1	19125799	19125820	19122131	19122152	2	11	100	44	0.954678	AG	22			.		.		0	DHS	AT1G51570.1	1	1	DHS
17425	1	19295549	19295569	19291880	19291900	3	7	100	42	0.37134	ATT	21			.		.		0		.			.
17595	1	19443452	19443475	19439783	19439806	2	12	100	48	1.02588	AT	24			AT1G52191.1	1	AT1G52191.1	1	2	intron	AT1G52191.1	1	3	.
17597	1	19444746	19444787	19441077	19441118	2	21	100	84	0.930793	AT	42			AT1G52191.1	1	AT1G52191.1	1	2	intron	AT1G52191.1	1	3	.
17603	1	19456521	19456565	19452852	19452896	3	15	100	90	1.12635	CTT	45		intergenic	.		.		0	plus/minus 1kb	AT1G52220.1	1	1	.
17631	1	19488567	19488595	19484898	19484926	3	9.7	92	51	0.705979	GAT	29.1			AT1G52320.2	1	.		1	exon	AT1G52320.1	1	2	.
17642	1	19496125	19496156	19492456	19492487	3	10.3	93	57	0.800316	GAA	30.9			AT1G52342.1	1	.		1	exon	AT1G52340.1	1	2	.
17757	1	19639878	19639919	19636210	19636251	4	10.5	97	63	0.894736	ATAT	42			.		.		0		.			.
17835	1	19719199	19719223	19715531	19715555	4	6.5	90	45	0.0792673	GTTT	26			.		.		0	plus/minus 1kb	AT1G52940.1	1	1	.
17871	1	19748291	19748322	19744623	19744654	2	16	93	57	1.08355	AT	32			.		.		0	DHS	AT1G53000.1	1	1	DHS
17886	1	19756972	19757003	19753304	19753335	2	16	100	64	1.09435	AT	32			AT1G53020.1	1	AT1G53020.1	1	2	intron	AT1G53020.1	1	3	.
17887	1	19757067	19757102	19753399	19753434	2	18	100	72	1.04375	AT	36			AT1G53020.1	1	AT1G53020.1	1	2	intron	AT1G53020.1	1	3	.
17965	1	19855276	19855303	19851608	19851635	3	9.3	92	49	0.646654	AAG	27.9			.		.		0	plus/minus 1kb	AT1G53230.1	1	1	.
17970	1	19860991	19861024	19857323	19857356	2	17	100	68	1.07348	CT	34			.		.		0	DHS	AT1G53240.1	1	1	DHS
18083	1	20008344	20008368	20004676	20004700	2	12.5	100	50	1.05197	AG	25			AT1G53600.1	1	AT1G53600.1	1	2	intron	AT1G53600.1	1	3	.
18207	1	20152114	20152144	20148446	20148476	3	10.3	100	62	0.904241	ACA	30.9			.		.		0	plus/minus 1kb	AT1G53970.1	1	1	.
18293	1	20222831	20222854	20219164	20219187	2	12.5	91	43	0.949864	AG	25			.		AT1G54160.1	1	1	intron	AT1G54160.1	1	2	.
18327	1	20254902	20254924	20251235	20251257	3	7.7	100	46	0.516554	GAT	23.1			AT1G54230.1	1	AT1G54230.1	1	2	intron	AT1G54230.1	1	3	.
18331	1	20265684	20265710	20262017	20262043	3	9	100	54	0.738874	GAA	27			AT1G54270.1	1	.		1	exon	AT1G54270.1	1	2	.
18332	1	20271342	20271365	20267675	20267698	2	12	90	41	0.895204	GA	24			.		.		0	plus/minus 1kb	AT1G54280.1	1	1	.
18380	1	20331344	20331372	20327677	20327705	3	9.7	100	58	0.834623	GAT	29.1			AT1G54440.1	1	.		1	exon	AT1G54440.1	1	2	.
18406	1	20366518	20366539	20362851	20362872	2	11	100	44	0.954678	AT	22			.		.		0	DHS	AT1G54520.1	1	1	DHS
18420	1	20397984	20398010	20394317	20394343	2	13.5	92	47	1.02035	TG	27			AT1G54610.1	1	AT1G54610.1	1	2	intron	AT1G54610.1	1	3	.
18577	1	20542462	20542490	20538795	20538823	3	9.7	92	51	0.705979	GAG	29.1			AT1G55040.1	1	.		1	exon	AT1G55040.1	1	2	.
18626	1	20610147	20610175	20606480	20606508	2	14.5	100	58	1.1022	TA	29			.		.		0	DHS	AT1G55240.1	1	1	DHS
18639	1	20633322	20633354	20629655	20629687	2	16.5	100	66	1.08521	AG	33			.		.		0	DHS	AT1G55300.1	1	1	DHS
18699	1	20733253	20733277	20729587	20729611	3	8.3	100	50	0.6266	TCT	24.9			AT1G55530.1	1	.		1	exon/DHS	AT1G55530.1	1	2	DHS
18774	1	20852647	20852697	20848981	20849031	8	6.6	91	92	0.2371	GAGGGAGA	52.8			.		.		0	DHS	AT1G55760.1	1	1	DHS
18846	1	20966369	20966397	20962704	20962732	3	9.7	100	58	0.834623	TCT	29.1			AT1G56045.1	1	AT1G56045.1	1	2	intron/DHS	AT1G56040.1	1	3	DHS
18955	1	21065904	21065947	21062239	21062282	2	22	95	81	0.937937	AT	44			AT1G56250.1	1	AT1G56250.1	1	2	intron	AT1G56250.1	1	3	.
19084	1	21185333	21185354	21181668	21181689	3	7.3	100	44	0.435838	CTT	21.9			AT1G56540.1	1	.		1	exon	AT1G56530.1	1	2	.
19092	1	21195454	21195496	21191789	21191831	2	21.5	100	86	0.912027	AT	43			AT1G56555.1	1	AT1G56555.1	1	2	intron	AT1G56555.1	1	3
19115	1	21213584	21213611	21209919	21209946	2	14	92	49	1.04094	TA	28			.		.		0	plus/minus 1kb	AT1G56600.1	1	1	.
19349	1	21481492	21481517	21477827	21477852	3	8.7	100	52	0.692832	AAT	26.1			.		.		0	plus/minus 1kb	AT1G58050.1	1	1	.
19390	1	21541884	21541908	21538219	21538243	2	12.5	100	50	1.05197	AC	25			AT1G58180.1	1	AT1G58180.1	1	2	intron	AT1G58180.1	1	3	.
19403	1	21557748	21557776	21554083	21554111	3	10	92	53	0.747237	GAA	30			AT1G58210.1	1	.		1	exon	AT1G58210.1	1	2	.
19405	1	21557936	21557969	21554271	21554304	3	11.3	93	61	0.908504	TGA	33.9			AT1G58210.1	1	.		1	exon	AT1G58210.1	1	2	.
19821	1	22055726	22055751	22052061	22052086	4	6.5	100	52	0.266031	TTCT	26			AT1G59900.1	1	AT1G59900.1	1	2	intron	AT1G59900.1	1	3	.
19827	1	22060205	22060231	22056540	22056566	3	9	100	54	0.738874	TCC	27			AT1G59910.1	1	.		1	exon	AT1G59910.1	1	2	.
19832	1	22071006	22071028	22067341	22067363	3	7.7	100	46	0.516554	TTG	23.1	HS_311_TTG_unk		.		.		0	plus/minus 1kb	AT1G59950.1	1	1		1	2	HS/5'3'	id-1103732
19969	1	22209014	22209034	22205349	22205369	2	10.5	100	42	0.908802	TG	21			.		.		0	DHS	AT1G60200.1	1	1	DHS
19977	1	22213279	22213315	22209614	22209650	3	12	97	67	1.00818	TGA	36	CD_31_TGA_ots1		AT1G60220.1	1	.		1	exon	AT1G60220.1	1	2	.
19995	1	22249314	22249337	22245649	22245672	3	8	90	41	0.379879	TGA	24			AT1G60370.1	1	.		1	exon	AT1G60370.1	1	2	.
20153	1	22445774	22445797	22442109	22442132	3	8	100	48	0.573207	ATG	24			.		.		0	DHS	AT1G60940.1	1	1	DHS
20170	1	22472779	22472800	22469114	22469135	2	11	100	44	0.954678	AT	22			AT1G60995.1	1	AT1G60995.1	1	2	intron	AT1G60995.1	1	3	.
20181	1	22495043	22495068	22491378	22491403	3	8.7	91	45	0.530293	TCT	26.1			.		.		0	DHS	AT1G61065.1	1	1	DHS
20188	1	22498685	22498704	22495020	22495039	3	6.7	100	40	0.303382	GGA	20.1			AT1G61080.1	1	.		1	exon	AT1G61080.1	1	2	.
20205	1	22517606	22517650	22513941	22513985	2	22.5	90	76	0.974416	AT	45			AT1G61105.1	1	AT1G61105.1	1	2	intron	AT1G61105.1	1	3	.
20216	1	22526901	22526928	22523236	22523263	3	10	92	46	0.747237	ATA	30			.		.		0	plus/minus 1kb	AT1G61120.1	1	1	.
20218	1	22527952	22527977	22524287	22524312	2	13	100	52	1.07224	AT	26			AT1G61120.1	1	AT1G61120.1	1	2	intron/DHS	AT1G61120.1	1	3	DHS
20262	1	22592393	22592424	22588728	22588759	2	15.5	93	57	1.08081	TC	31			.		.		0	plus/minus 1kb	AT1G61250.1	1	1	.
20280	1	22601606	22601644	22597941	22597979	3	13	100	78	1.09264	ATT	39	NC_601_ATT		.		.		0		.			.
20293	1	22622980	22623009	22619315	22619344	2	15	92	53	1.06851	TC	30			AT1G61320.1	1	AT1G61320.1	1	2	intron	AT1G61320.1	1	3	.
20386	1	22771348	22771368	22767683	22767703	3	7	100	42	0.37134	CTT	21			AT1G61667.1	1	.		1	exon/DHS	AT1G61667.1	1	2	DHS
20411	1	22790532	22790556	22786867	22786891	3	8.3	90	43	0.438104	AGA	24.9			.		.		0	DHS	AT1G61700.1	1	1	DHS
20572	1	22998803	22998839	22995138	22995174	6	6.2	90	60	0.0731008	AGTGGA	37.2			AT1G62240.1	1	.		1	exon		1	2	.	unknown
20602	1	23040385	23040405	23036720	23036740	3	7	100	42	0.37134	TTC	21			AT1G62310.1	1	.		1	exon	AT1G62310.1	1	2	.
20668	1	23115878	23115901	23112213	23112236	2	12	100	48	1.02588	AT	24			AT1G62440.1	1	AT1G62440.1	1	2	intron	AT1G62440.1	1	3	.
20695	1	23136083	23136102	23132418	23132437	3	6.7	100	40	0.303382	GGA	20.1			AT1G62500.1	1	.		1	exon	AT1G62500.1	1	2	.
20755	1	23211635	23211674	23207970	23208009	3	13.3	94	73	1.05514	GAT	39.9			.		.		0	plus/minus 1kb	AT1G62680.1	1	1	.
20800	1	23289713	23289746	23286048	23286081	3	11.3	93	61	0.908504	TGA	33.9			AT1G62870.1	1	.		1	exon	AT1G62870.1	1	2	.
20877	1	23385990	23386014	23382325	23382349	3	8.3	100	50	0.6266	TCA	24.9			AT1G63057.1	1	.		1	exon	AT1G63057.1	1	2	.
20885	1	23404812	23404836	23401147	23401171	3	8.3	90	43	0.438104	TTG	24.9			AT1G63100.1	1	.		1	exon/DHS	AT1G63100.1	1	2	DHS
20896	1	23412694	23412719	23409029	23409054	3	8.7	91	45	0.530293	ATG	26.1			.		.		0	plus/minus 1kb	AT1G63120.1	1	1	.
20904	1	23429668	23429694	23426003	23426029	3	9	100	54	0.738874	TCT	27			AT1G63170.1	1	.		1	exon	AT1G63170.1	1	2	.
20926	1	23447288	23447307	23443623	23443642	3	6.7	100	40	0.303382	ATG	20.1			.		.		0	plus/minus 1kb	AT1G63210.1	1	1	.
20973	1	23521401	23521432	23517736	23517767	2	16	100	64	1.09435	AT	32			AT1G63420.1	1	AT1G63420.1	1	2	intron	AT1G63420.1	1	3	.
20988	1	23545820	23545905	23542155	23542240	2	44	93	148	1.58339	GA	88			.		.		0	plus/minus 1kb	AT1G63480.1	1	1	.
21002	1	23564143	23564162	23560480	23560499	3	6.7	100	40	0.303382	ACA	20.1			AT1G63520.1	1	.		1	exon	AT1G63520.1	1	2	.
21084	1	23672789	23672829	23669126	23669166	3	14.3	90	72	1.06134	GAT	42.9			.		.		0	DHS	AT1G63800.1	1	1	DHS
21085	1	23673446	23673473	23669783	23669810	3	9.3	92	49	0.646654	TTC	27.9			AT1G63810.1	1	.		1	exon	AT1G63800.1	1	2	.
21097	1	23694188	23694215	23690525	23690552	2	14	92	49	1.04094	AG	28			.		.		0	DHS	AT1G63840.1	1	1	DHS
21123	1	23725490	23725518	23721827	23721855	5	5.8	100	58	0.0979872	GGTCG	29			.		.		0	plus/minus 1kb	AT1G63910.1	1	1		1	2	HS/5'3'	id-1186460
21221	1	23881957	23881980	23878294	23878317	3	8	100	48	0.573207	CAT	24			AT1G64340.1	1	.		1	exon	AT1G64340.1	1	2	.
21294	1	23957110	23957141	23953447	23953478	3	10.7	93	57	0.846978	GAT	32.1			AT1G64500.1	1	.		1	exon	AT1G64500.1	1	2	.
21337	1	24023524	24023547	24019861	24019884	3	8	90	41	0.379879	TTC	24			.		.		0	plus/minus 1kb	AT1G64625.1	1	1	.
21348	1	24036582	24036601	24032919	24032938	2	10	100	40	0.855577	AT	20			AT1G64670.1	1	AT1G64670.1	1	2	intron	AT1G64670.1	1	3	.
21350	1	24038857	24038876	24035194	24035213	3	6.7	100	40	0.303382	AAT	20.1			.		.		0	plus/minus 1kb	AT1G64680.1	1	1	.
21427	1	24146747	24146779	24143084	24143116	4	8.2	93	59	0.501021	TAAA	32.8			AT1G64990.1	1	AT1G64990.1	1	2	intron	AT1G64990.1	1	3	.
21447	1	24172844	24172864	24169181	24169201	2	10.5	100	42	0.908802	TG	21			AT1G65060.1	1	AT1G65060.1	1	2	intron/DHS	AT1G65060.1	1	3	DHS
21531	1	24309301	24309330	24305638	24305667	2	15	100	60	1.10325	CA	30			AT1G65430.1	1	AT1G65430.1	1	2	intron/DHS	AT1G65430.1	1	3	DHS
21585	1	24370108	24370133	24366445	24366470	3	8.7	100	52	0.692832	GAA	26.1			.		.		0	DHS	AT1G65540.1	1	1	DHS
21638	1	24441931	24441951	24438268	24438288	3	7	100	42	0.37134	CTT	21			AT1G65710.1	1	.		1	exon	AT1G65710.1	1	2	.
21649	1	24452839	24452858	24449176	24449195	3	6.7	100	40	0.303382	TTA	20.1			.		.		0		.			.
21711	1	24532879	24532899	24529216	24529236	3	7	100	42	0.37134	AGA	21			.		.		0	plus/minus 1kb	AT1G65920.1	1	1	.
21923	1	24760393	24760415	24756730	24756752	3	8	90	41	0.379879	ATT	24			.		.		0	plus/minus 1kb	AT1G66380.1	1	1	.
21937	1	24768083	24768121	24764420	24764458	2	19.5	100	78	0.989118	AT	39			AT1G66390.1	1	AT1G66390.1	1	2	intron	AT1G66390.1	1	3	.
21956	1	24776854	24776904	24773191	24773241	3	17	92	90	1.10043	ATG	51			.		.		0		.			.
22010	1	24853392	24853418	24849729	24849755	3	9	100	54	0.738874	TCT	27			AT1G66610.1	1	.		1	exon	AT1G66600.1	1	2	.
22145	1	25034129	25034149	25030466	25030486	2	10.5	100	42	0.908802	AT	21			.		.		0	DHS	AT1G67050.1	1	1	DHS
22161	1	25046489	25046515	25042826	25042852	2	13.5	92	47	1.02035	TA	27			AT1G67070.1	1	AT1G67070.1	1	2	intron	AT1G67070.1	1	3
22200	1	25100168	25100187	25096505	25096524	3	6.7	100	40	0.303382	GAA	20.1			.		.		0	plus/minus 1kb	AT1G67120.1	1	1	.
22212	1	25105289	25105311	25101626	25101648	3	7.7	100	46	0.516554	TCT	23.1			AT1G67140.1	1	.		1	exon	AT1G67140.1	1	2	.
22421	1	25390281	25390304	25386618	25386641	2	12	90	41	0.895204	TG	24			AT1G67720.1	1	AT1G67720.1	1	2	intron	AT1G67720.1	1	3	.
22458	1	25438658	25438686	25434995	25435023	3	9.7	92	51	0.705979	GAG	29.1			AT1G67840.2	1	.		1	exon	AT1G67840.2	1	2		1
22486	1	25501376	25501399	25497713	25497736	3	8	90	41	0.379879	GTA	24			AT1G68020.1	1	.		1	exon	AT1G68020.1	1	2	.
22488	1	25504883	25504903	25501220	25501240	3	7	100	42	0.37134	GTA	21			AT1G68030.1	1	.		1	exon	AT1G68030.1	1	2		1
22524	1	25555899	25555928	25552236	25552265	2	15	100	60	1.10325	CA	30			AT1G68170.1	1	AT1G68170.1	1	2	intron/DHS	AT1G68170.1	1	3	DHS
22582	1	25625868	25625891	25622205	25622228	3	8	90	41	0.379879	CTC	24			AT1G68360.1	1	.		1	exon	AT1G68360.1	1	2	.
22593	1	25641811	25641830	25638148	25638167	2	10	100	40	0.855577	TA	20			.		.		0	DHS	AT1G68380.1	1	1	DHS
22629	1	25688153	25688185	25684490	25684522	5	7	90	44	0.23602	AAAAG	35			.		.		0	plus/minus 1kb	AT1G68480.1	1	1	.
22693	1	25747979	25748002	25744316	25744339	3	7.7	95	41	0.409266	ATT	23.1			.		.		0		.			.
22708	1	25775453	25775474	25771790	25771811	3	7.3	100	44	0.435838	CCA	21.9			AT1G68640.1	1	.		1	exon	AT1G68640.1	1	2	.
22713	1	25785832	25785861	25782169	25782198	2	15	92	53	1.06851	CT	30			.		.		0	DHS	AT1G68670.1	1	1	DHS
22751	1	25827497	25827539	25823834	25823876	2	21.5	100	86	0.912027	TA	43			AT1G68750.1	1	AT1G68750.1	1	2	intron	AT1G68750.1	1	3	.
22786	1	25864961	25864992	25861298	25861329	3	10.3	96	57	0.840458	AAG	30.9			AT1G68810.1	1	.		1	exon	AT1G68810.1	1	2	.
22829	1	25952443	25952465	25948780	25948802	3	8	90	41	0.379879	CAA	24			AT1G69030.1	1	AT1G69030.1	1	2	intron	AT1G69030.1	1	3	.
22912	1	26024296	26024321	26020633	26020658	2	13	91	45	0.982079	AG	26			AT1G69220.1	1	AT1G69220.1	1	2	intron	AT1G69210.1	1	3	.
22913	1	26033086	26033110	26029423	26029447	2	12.5	100	50	1.05197	AC	25			AT1G69240.1	1	AT1G69240.1	1	2	intron	AT1G69240.1	1	3	.
22943	1	26061667	26061695	26058004	26058032	4	7	96	51	0.293694	GAAA	28			.		.		0	DHS	AT1G69310.1	1	1	DHS
22972	1	26100270	26100289	26096607	26096626	3	6.7	100	40	0.303382	ACA	20.1			AT1G69420.2	1	.		1	exon	AT1G69420.2	1	2	.
22993	1	26128544	26128570	26124881	26124907	3	9	100	54	0.738874	CAA	27	CD_41_CAA_CYP		AT1G69500.1	1	.		1	exon	AT1G69500.1	1	2	.
23052	1	26208293	26208317	26204630	26204654	3	8	91	43	0.399598	GAT	24			.		.		0	DHS	AT1G69670.1	1	1	DHS
23063	1	26220091	26220113	26216428	26216450	3	7.7	100	46	0.516554	ATC	23.1			AT1G69690.1	1	.		1	exon	AT1G69690.1	1	2	.
23163	1	26361320	26361344	26357657	26357681	3	9	91	40	0.581349	TTC	27			.		.		0	DHS	AT1G69980.1	1	1	DHS
23169	1	26368313	26368339	26364650	26364676	2	13.5	92	47	1.02035	AG	27			.		.		0	DHS	AT1G70000.1	1	1	DHS
23191	1	26398758	26398804	26395095	26395141	2	23.5	95	87	0.893802	AT	47			AT1G70080.1	1	AT1G70080.1	1	2	intron	AT1G70080.1	1	3	.
23231	1	26452036	26452075	26448373	26448412	5	7.6	91	66	0.382314	TTTAT	38			.		.		0	DHS	AT1G70220.1	1	1	DHS
23266	1	26495000	26495023	26491337	26491360	4	6	100	48	0.140172	AAAG	24			AT1G70320.1	1	AT1G70320.1	1	2	intron	AT1G70320.1	1	3	.
23312	1	26542054	26542075	26538391	26538412	3	7.3	100	44	0.435838	CTT	21.9			.		.		0	DHS	AT1G70410.2	1	1	DHS
23348	1	26574113	26574136	26570450	26570473	2	12	100	48	1.02588	TC	24			.		.		0	DHS	AT1G70505.1	1	1	DHS
23383	1	26634937	26634965	26631274	26631302	3	9.7	100	58	0.834623	TCT	29.1			.		.		0	plus/minus 1kb	AT1G70630.1	1	1	.
23384	1	26635478	26635513	26631815	26631850	3	12.3	94	67	0.999768	CAA	36.9			.		.		0	plus/minus 1kb	AT1G70630.1	1	1	.
23387	1	26648795	26648816	26645132	26645153	2	11	100	44	0.954678	TG	22			AT1G70670.1	1	AT1G70670.1	1	2	intron	AT1G70670.1	1	3	.
23433	1	26720926	26720966	26717264	26717304	2	20	90	68	1.03466	AT	40			.		.		0	DHS	AT1G70850.1	1	1	DHS
23434	1	26721932	26721955	26718270	26718293	2	12	100	48	1.02588	CA	24			.		.		0		.			.
23451	1	26740481	26740510	26736819	26736848	2	15	92	53	1.06851	TA	30			AT1G70920.1	1	AT1G70920.1	1	2	intron	AT1G70920.1	1	3	.
23529	1	26867263	26867309	26863601	26863647	3	15.7	100	94	1.12235	GAA	47.1			.		.		0	DHS	AT1G71260.1	1	1	DHS
23610	1	27026062	27026086	27022400	27022424	3	8	95	43	0.469246	AGA	24			.		.		0	DHS	AT1G71840.1	1	1	DHS
23654	1	27088942	27088983	27085280	27085321	2	21	95	77	0.970406	TA	42			AT1G71960.1	1	AT1G71960.1	1	2	intron/DHS	AT1G71960.1	1	3	DHS
23682	1	27132531	27132556	27128869	27128894	3	8.7	91	45	0.530293	TTG	26.1			.		.		0	plus/minus 1kb	AT1G72110.1	1	1	.
23742	1	27230235	27230273	27226573	27226611	6	6.5	90	57	0.149379	CAACAG	39			AT1G72310.1	1	.		1	exon	AT1G72310.1	1	2	.
23762	1	27260640	27260662	27256978	27257000	2	11.5	100	46	0.993576	CT	23			.		.		0	DHS	AT1G72410.1	1	1	DHS
23764	1	27262107	27262130	27258445	27258468	2	12	100	48	1.02588	AT	24			.		.		0	DHS	AT1G72416.1	1	1	DHS
23787	1	27285655	27285675	27281993	27282013	3	7	100	42	0.37134	ATT	21			.		.		0	DHS	AT1G72460.1	1	1	DHS
23825	1	27356945	27356978	27353283	27353316	2	17	93	61	1.07967	CT	34			AT1G72650.1	1	AT1G72650.1	1	2	intron	AT1G72650.1	1	3	.
23901	1	27500438	27500457	27496777	27496796	3	6.7	100	40	0.303382	GAA	20.1			AT1G73110.1	1	.		1	exon	AT1G73110.1	1	2		1
23932	1	27558036	27558056	27554375	27554395	2	10.5	100	42	0.908802	AT	21			AT1G73280.1	1	AT1G73280.1	1	2	intron	AT1G73280.1	1	3	.
23936	1	27560859	27560885	27557198	27557224	2	13.5	92	47	1.02035	TA	27			AT1G73290.1	1	AT1G73290.1	1	2	intron	AT1G73290.1	1	3	.
23937	1	27565228	27565270	27561567	27561609	2	21.5	100	86	0.912027	AT	43			AT1G73300.1	1	AT1G73300.1	1	2	intron	AT1G73300.1	1	3	.
23961	1	27601657	27601682	27597996	27598021	2	13.5	92	47	1.02035	TC	27			.		.		0	DHS	AT1G73400.1	1	1	DHS
24006	1	27678261	27678291	27674600	27674630	2	15	93	55	1.07447	AT	30			AT1G73603.1	1	AT1G73603.1	1	2	intron	AT1G73603.1	1	3	.
24039	1	27712061	27712082	27708400	27708421	2	11	100	44	0.954678	TA	22			.		.		0	DHS	AT1G73680.1	1	1	DHS
24046	1	27724899	27724932	27721238	27721271	3	11.3	100	68	0.996479	CAT	33.9			AT1G73710.1	1	.		1	exon/DHS	AT1G73710.1	1	2	DHS
24058	1	27752274	27752296	27748613	27748635	2	11.5	100	46	0.993576	TA	23			AT1G73805.1	1	AT1G73805.1	1	2	intron	AT1G73805.1	1	3	.
24252	1	28136484	28136503	28132823	28132842	2	10	100	40	0.855577	AG	20			.		.		0	plus/minus 1kb	AT1G74890.1	1	1	.
24271	1	28183708	28183738	28180047	28180077	3	10.3	100	62	0.904241	TCA	30.9			.		.		0	plus/minus 1kb	AT1G75050.1	1	1	.
24344	1	28282880	28282908	28279219	28279247	3	9.7	92	51	0.705979	ATC	29.1			AT1G75370.1	1	AT1G75370.1	1	2	intron	AT1G75370.1	1	3	.
24367	1	28305462	28305489	28301801	28301828	3	9	92	49	0.598838	TTG	27			AT1G75410.1	1	.		1	exon	AT1G75410.1	1	2	.
24405	1	28343792	28343816	28340131	28340155	2	12.5	91	43	0.949864	TG	25			.		.		0	DHS	AT1G75500.1	1	1	DHS
24406	1	28343961	28343984	28340300	28340323	2	12	100	48	1.02588	AT	24			.		.		0	DHS	AT1G75500.1	1	1	DHS
24669	1	28713351	28713370	28708457	28708476	2	10	100	40	0.855577	AT	20			.		.		0	DHS	AT1G76510.1	1	1	DHS
24696	1	28771767	28771795	28766873	28766901	3	9.7	100	58	0.834623	AAC	29.1			.		.		0	plus/minus 1kb	AT1G76650.1	1	1		1	2	HS/5'3'	id-1438834
24755	1	28821718	28821750	28816824	28816856	3	11	100	66	0.971797	GAA	33			AT1G76780.1	1	.		1	exon	AT1G76780.1	1	2	.
24791	1	28846892	28846912	28841998	28842018	2	10.5	100	42	0.908802	AG	21			AT1G76825.1	1	AT1G76825.1	1	2	intron	AT1G76825.1	1	3	.
24848	1	28908542	28908568	28903648	28903674	3	9	100	54	0.738874	CCT	27			AT1G76940.1	1	.		1	exon	AT1G76940.1	1	2	.
24859	1	28923524	28923550	28918630	28918656	2	13.5	92	40	1.02035	TA	27			.		.		0	plus/minus 1kb	AT1G76955.1	1	1	.
24871	1	28937149	28937187	28932255	28932293	6	6.7	91	49	0.208708	CTCTGT	40.2			.		.		0		.			.
24906	1	28983297	28983325	28978403	28978431	3	9.7	100	58	0.834623	TCT	29.1			AT1G77122.1	1	.		1	exon	AT1G77130.1	1	2	.
24931	1	29016967	29016994	29012073	29012100	2	14	100	56	1.09696	AG	28			.		.		0		.			.
24954	1	29084747	29084775	29079853	29079881	3	9.7	100	58	0.834623	TAA	29.1	NC_611_TAA		.		.		0		.			.
24958	1	29098425	29098447	29093531	29093553	3	7.7	100	46	0.516554	GTC	23.1			.		.		0	DHS	AT1G77410.1	1	1	DHS
24959	1	29102818	29102849	29097924	29097955	3	11	90	52	0.835069	TCT	33			AT1G77440.1	1	AT1G77440.1	1	2	intron	AT1G77440.1	1	3	.
24982	1	29140677	29140699	29135783	29135805	3	8	90	41	0.379879	CAA	24			.		.		0	DHS	AT1G77530.1	1	1	DHS
25004	1	29183746	29183769	29178852	29178875	3	8	90	41	0.379879	TTC	24			AT1G77640.1	1	.		1	exon/DHS	AT1G77640.1	1	2	DHS	1
25016	1	29192661	29192684	29187767	29187790	3	8	90	41	0.379879	AAG	24			.		.		0	DHS	AT1G77660.1	1	1	DHS
25087	1	29311754	29311793	29306860	29306899	2	20	100	80	0.969646	CT	40			.		.		0	plus/minus 1kb	AT1G77950.1	1	1	.
25089	1	29317286	29317308	29312392	29312414	3	7.7	100	46	0.516554	GTT	23.1			AT1G77960.1	1	.		1	exon	AT1G77960.1	1	2		1
25224	1	29453753	29453772	29448860	29448879	3	6.7	100	40	0.303382	ATG	20.1			AT1G78260.1	1	AT1G78260.1	1	2	intron/DHS	AT1G78260.1	1	3	DHS
25228	1	29464114	29464137	29459221	29459244	3	8	90	41	0.379879	TAA	24			.		AT1G78290.3	1	1	intron/DHS	AT1G78290.2	1	2	DHS
25271	1	29509445	29509480	29504552	29504587	2	18.5	94	67	1.05165	TC	37			.		.		0	DHS	AT1G78420.1	1	1	DHS
25362	1	29670743	29670770	29665850	29665877	3	9.3	92	49	0.646654	TTG	27.9			AT1G78910.1	1	AT1G78910.1	1	2	intron	AT1G78910.1	1	3	.
25370	1	29698626	29698650	29693733	29693757	2	12.5	100	50	1.05197	TA	25			AT1G78955.1	1	AT1G78955.1	1	2	intron	AT1G78955.1	1	3	.
25471	1	29865679	29865699	29860786	29860806	3	7	100	42	0.37134	GAA	21			.		.		0	plus/minus 1kb	AT1G79370.1	1	1	.
25485	1	29878292	29878316	29873399	29873423	4	6.2	100	50	0.191715	TCTT	24.8			AT1G79420.1	1	AT1G79420.1	1	2	intron	AT1G79420.1	1	3	.
25488	1	29882283	29882313	29877390	29877420	5	6.2	92	48	0.0639212	TTTTG	31			AT1G79430.1	1	.		1	exon	AT1G79430.1	1	2	.	APL/WDY phloem development
25572	1	30021040	30021067	30016147	30016174	3	9.3	92	49	0.646654	TCT	27.9			AT1G79780.1	1	AT1G79780.1	1	2	intron	AT1G79780.1	1	3	.
25576	1	30023441	30023463	30018548	30018570	3	8	90	41	0.379879	GAT	24			AT1G79800.1	1	.		1	exon	AT1G79800.1	1	2	.
25585	1	30041602	30041622	30036709	30036729	2	10.5	100	42	0.908802	TC	21			.		.		0	DHS	AT1G79840.1	1	1	DHS
25591	1	30052278	30052318	30047385	30047425	2	20.5	100	82	0.9501	TA	41			AT1G79880.2	1	AT1G79880.2	1	2	intron	AT1G79880.2	1	3	.
25595	1	30053750	30053774	30048857	30048881	2	12.5	91	43	0.949864	TC	25			AT1G79890.1	1	AT1G79890.1	1	2	intron	AT1G79880.2	1	3	.
25619	1	30087232	30087258	30082339	30082365	3	9	91	47	0.581349	TCT	27			.		AT1G79970.2	1	1	intron	AT1G79970.2	1	2	.
25638	1	30109347	30109374	30104454	30104481	2	14	100	56	1.09696	AG	28			.		.		0	DHS	AT1G80030.1	1	1	DJS
25639	1	30119108	30119131	30114215	30114238	3	8	90	41	0.379879	ACT	24			.		.		0	plus/minus 1kb	AT1G80050.1	1	1	.
25646	1	30139184	30139217	30134291	30134324	2	17	100	68	1.07348	TA	34			AT1G80100.1	1	AT1G80100.1	1	2	intron	AT1G80100.1	1	3	.
25706	1	30227964	30227983	30223072	30223091	3	6.7	100	40	0.303382	AAG	20.1			.		.		0	plus/minus 1kb	AT1G80390.1	1	1	.
25736	1	30271950	30271972	30267058	30267080	2	11.5	100	46	0.993576	TC	23			.		.		0	DHS	AT1G80490.1	1	1	DHS
25739	1	30277852	30277880	30272960	30272988	2	14.5	100	58	1.1022	TC	29			.		.		0	DHS	AT1G80510.1	1	1	DHS
25746	1	30292505	30292538	30287613	30287646	2	17	100	68	1.07348	AT	34			.		.		0	DHS	AT1G80550.1	1	1	DHS
25749	1	30299024	30299048	30294132	30294156	3	8.3	90	43	0.438104	AGA	24.9			AT1G80580.1	1	.		1	exon	AT1G80580.1	1	2	.
25752	1	30306835	30306859	30301943	30301967	3	8.3	90	43	0.438104	GTT	24.9			AT1G80610.1	1	.		1	exon/DHS	AT1G80610.1	1	2	DHS	1
25786	1	30373638	30373657	30368746	30368765	3	6.7	100	40	0.303382	GAA	20.1			AT1G80810.1	1	.		1	exon	AT1G80810.1	1	2	.
25797	1	30389179	30389207	30384287	30384315	2	14.5	100	58	1.1022	AT	29			AT1G80840.1	1	AT1G80840.1	1	2	intron	AT1G80840.1	1	3	.
25806	1	30395791	30395823	30390899	30390931	3	11.3	93	61	0.908504	GTT	33.9			.		.		0	plus/minus 1kb	AT1G80865.1	1	1		1	2	HS/5'3'	id-1520033
25811	1	30402033	30402082	30397141	30397190	3	16.7	100	100	1.10582	AGA	50.1			.		.		0	DHS	AT1G80880.1	1	1	DHS
25820	1	30417113	30417132	30412221	30412240	2	10	100	40	0.855577	GT	20			.		.		0	plus/minus 1kb	AT1G80940.2	1	1	.
25822	1	30420965	30420990	30416073	30416098	3	8.7	91	45	0.530293	ATC	26.1			AT1G80960.2	1	.		1	exon	AT1G80960.2	1	2	.
25833	1	30432523	30432563	30427631	30427671	7	5.9	100	82	0.149786	TTAGGGT	41.3			.		.		0		.			.
26035	2	160798	160827	160799	160828	3	10	100	60	0.870827	TTC	30			.		.		0	DHS	AT2G01330.1	1	1	DHS
26078	2	208284	208365	208285	208366	2	41	100	164	1.93432	TC	82			AT2G01460.1	1	AT2G01460.1	1	2	intron	AT2G01460.1	1	3	.
26079	2	214268	214287	214269	214288	3	6.7	100	40	0.303382	GAA	20.1			AT2G01470.1	1	.		1	exon/DHS	AT2G01470.1	1	2	DHS
26127	2	273311	273335	273312	273336	3	8.3	100	50	0.6266	ATA	24.9			.		.		0	plus/minus 1kb	AT2G01600.1	1	1	.
26133	2	278218	278238	278219	278239	3	7	100	42	0.37134	GAA	21			AT2G01620.1	1	.		1	exon	AT2G01620.1	1	2	.
26155	2	309238	309288	309239	309289	3	17	91	67	1.09954	GTT	51			AT2G01690.1	1	.		1	exon	AT2G01680.1	1	2	.
26172	2	336499	336547	336500	336548	2	24.5	100	98	0.825576	AT	49			.		.		0	plus/minus 1kb	AT2G01770.1	1	1	.
26181	2	346436	346462	346437	346463	2	14	92	49	1.04094	AT	28			.		.		0		.			.
26216	2	388022	388057	388023	388058	3	11.3	93	58	0.908504	TTC	33.9			.		.		0	DHS	AT2G01860.1	1	1	DHS
26278	2	457125	457148	457126	457149	3	8	90	41	0.379879	TTC	24			AT2G01980.1	1	.		1	exon	AT2G01980.1	1	2	.
26285	2	466013	466038	466014	466039	2	13	100	52	1.07224	AT	26			AT2G01990.1	1	AT2G01990.1	1	2	intron	AT2G01990.1	1	3	.
26541	2	654391	654412	654392	654413	3	7.3	100	44	0.435838	AAG	21.9			AT2G02470.1	1	.		1	exon	AT2G02470.1	1	2	.
26550	2	658781	658817	658782	658818	4	10.2	91	47	0.788307	TATA	40.8			.		.		0		.			.
26568	2	676324	676351	676325	676352	2	14.5	92	51	1.05688	TA	29			.		.		0	DHS	AT2G02520.1	1	1	DHS
26614	2	712685	712714	712686	712715	3	10	92	53	0.747237	TGT	30			.		.		0	plus/minus 1kb	AT2G02610.1	1	1	.
26713	2	799406	799436	799407	799437	3	9.7	93	48	0.721427	AGA	29.1			.		.		0	DHS	AT2G02800.1	1	1	DHS
26803	2	889568	889616	889569	889617	2	24.5	95	91	0.869893	TA	49			.		.		0	plus/minus 1kb	AT2G03030.1	1	1	.
26891	2	967864	967884	967867	967887	3	7	100	42	0.37134	AAG	21			AT2G03200.1	1	.		1	exon	AT2G03210.1	1	2	.
26895	2	973333	973357	973336	973360	3	8	91	43	0.399598	GAA	24			AT2G03230.1	1	.		1	exon	AT2G03240.1	1	2	.
26942	2	1015851	1015878	1015854	1015881	3	9.3	100	56	0.78188	TTG	27.9			AT2G03340.1	1	.		1	exon	AT2G03340.1	1	2	.
26953	2	1026503	1026523	1026506	1026526	3	7	100	42	0.37134	AAT	21			AT2G03370.1	1	AT2G03370.1	1	2	intron	AT2G03370.1	1	3	.
26993	2	1064208	1064259	1064211	1064262	3	17.3	90	85	1.09594	TCT	51.9			.		.		0	DHS	AT2G03505.1	1	1	DHS
26996	2	1066279	1066302	1066282	1066305	2	12	90	41	0.895204	AT	24			.		.		0	DHS	AT2G03510.1	1	1	DHS
27077	2	1164331	1164355	1164334	1164358	3	8.3	90	43	0.438104	AGA	24.9			.		.		0	plus/minus 1kb	AT2G03820.1	1	1	.
27095	2	1187747	1187775	1187750	1187778	3	9.7	92	51	0.705979	GAA	29.1			AT2G03890.1	1	.		1	exon	AT2G03890.1	1	2	.
27175	2	1241119	1241140	1241122	1241143	2	11	100	44	0.954678	AT	22			.		.		0		.			.
27434	2	1407643	1407666	1407646	1407669	3	8	90	41	0.379879	GAA	24			AT2G04160.1	1	.		1	exon	AT2G04160.1	1	2	.
27604	2	1534089	1534113	1534092	1534116	3	8.3	90	43	0.438104	AAG	24.9			AT2G04410.1	1	AT2G04410.1	1	2	intron	AT2G04400.1	1	3	.
27699	2	1612863	1612892	1612866	1612895	3	10	92	53	0.747237	GAT	30			AT2G04620.1	1	.		1	exon	AT2G04620.1	1	2	.
27749	2	1644656	1644683	1644659	1644686	3	9.3	92	49	0.646654	TCT	27.9			AT2G04690.1	1	.		1	exon/DHS	AT2G04690.1	1	2	DHS
27790	2	1676843	1676862	1676846	1676865	3	6.7	100	40	0.303382	CAA	20.1	HS_322_CAA_fla7		.		.		0	DHS	AT2G04780.1	1	1	DHS
28047	2	1832513	1832532	1832516	1832535	3	6.7	100	40	0.303382	TCA	20.1	NC_622_TCA		.		.		0		.			.
28686	2	2268753	2268780	2268756	2268783	4	7.2	96	51	0.339062	ATTA	28.8			.		.		0		.			.
28690	2	2272179	2272200	2272182	2272203	3	7.3	100	44	0.435838	GAA	21.9			AT2G05920.1	1	.		1	exon/DHS	AT2G05920.1	1	2	DHS
28691	2	2272250	2272275	2272253	2272278	3	8.7	91	45	0.530293	GAA	26.1			.		.		0	DHS	AT2G05920.1	1	1	DHS
28706	2	2287333	2287360	2287336	2287363	5	5.6	100	56	0.0430605	AAACA	28			.		.		0	DHS	AT2G05940.1	1	1	DHS
28815	2	2355471	2355511	2355474	2355514	6	7	91	70	0.279514	AGGAAG	42			.		.		0	DHS	AT2G06040.1	1	1	DHS
28894	2	2427948	2427971	2427951	2427974	2	12	100	48	1.02588	AG	24			.		.		0	DHS	AT2G06200.1	1	1	DHS
28957	2	2460986	2461085	2460989	2461088	2	50	100	200	2.949	CT	100			.		.		0		.			.
29052	2	2542213	2542269	2542216	2542272	2	28.5	100	114	0.834841	GA	57			.		.		0		.			.
29162	2	2574436	2574471	2574439	2574474	6	6	96	65	0.0805604	CTCTAC	36	NC_632_CTCTAC		.		.		0		.			.
29415	2	2704192	2704231	2704195	2704234	6	6.7	97	73	0.273269	CAAAAG	40.2	NC_642_CAAAAG		.		.		0		.			.
29488	2	2758543	2758696	2758546	2758699	7	22	97	294	0.957629	TCTATGT	154			.		.		0		.			.
29496	2	2763556	2763586	2763559	2763589	3	10.3	92	55	0.785797	TCA	30.9			.		.		0	DHS	AT2G06850.1	1	1	DHS
29538	2	2799763	2799809	2799766	2799812	2	23.5	100	94	0.847814	AT	47			.		.		0		.			.
29598	2	2849518	2849543	2849521	2849546	2	13.5	92	47	1.02035	TC	27			.		.		0		.			.
29911	2	3092758	3092936	3092761	3092939	2	89.5	100	358	2.36418	CT	179			.		.		0	plus/minus 1kb	AT2G07440.1	1	1	.
30041	2	3183242	3183261	3183245	3183264	3	6.7	100	40	0.303382	AAG	20.1	NC_652_AAG		.		.		0		.			.
30141	2	3209914	3209952	3209917	3209955	2	19.5	100	78	0.989118	AT	39			.		AT2G07630.1	1	1	intron	.			.
30313	2	3560284	3560315	3560287	3560318	5	6.4	96	57	0.166821	AAAAG	32			.		.		0		.			.
30887	2	4084748	4084767	4077666	4077685	3	6.7	100	40	0.303382	TTA	20.1	NC_662_TTA		.		.		0		.			.
30940	2	4110600	4110673	4103518	4103591	2	37	100	148	1.45195	AG	74			.		.		0		.			.
31023	2	4172986	4173013	4165904	4165931	3	9.3	92	49	0.646654	TTC	27.9			.		.		0		.			.
31036	2	4177590	4177624	4170508	4170542	5	6.8	90	56	0.188856	AAAAG	34			.		.		0		.			.
31230	2	4323670	4323700	4316588	4316618	2	15.5	100	62	1.10049	TA	31			AT2G10950.1	1	AT2G10950.1	1	2	intron	AT2G10950.1	1	3	.
31615	2	4571759	4571795	4564677	4564713	6	6.2	96	67	0.133529	ACCACG	37.2			.		.		0		.			.
31714	2	4655578	4655685	4648496	4648603	2	55	94	199	2.13308	TC	110			.		.		0		.			.
32108	2	4935964	4935991	4928882	4928909	3	9.3	92	49	0.646654	AGA	27.9			.		.		0		.			.
32220	2	5029433	5029600	5022351	5022518	2	84	100	336	2.66685	GA	168			.		.		0		.			.
32243	2	5058669	5058688	5051587	5051606	2	10	100	40	0.855577	GT	20			.		.		0	DHS	AT2G12462.1	1	1	DHS
32502	2	5232774	5232840	5225692	5225758	6	11.2	98	127	1.00304	ACCACG	67.2			.		.		0		.			.
32506	2	5238004	5238058	5230922	5230976	6	9.2	97	103	0.757072	ACCACG	55.2			.		.		0		.			.
32577	2	5297927	5298000	5290845	5290918	9	8.4	91	124	0.623397	GAGAAGAAG	75.6			AT2G12875.1	1	AT2G12875.1	1	2	intron	AT2G12875.1	1	3	.
32802	2	5463778	5463874	5456696	5456792	2	48.5	100	194	2.81059	GA	97			.		.		0		.			.
32842	2	5497740	5497773	5490658	5490691	3	11.3	100	68	0.996479	GAA	33.9	NC_672_GAA		.		.		0		.			.
33039	2	5663468	5663491	5656386	5656409	3	8	100	48	0.573207	TTG	24			AT2G13570.1	1	.		1	exon	AT2G13570.1	1	2	.
33085	2	5701497	5701522	5694415	5694440	3	8.7	91	45	0.530293	CTT	26.1			.		.		0	plus/minus 1kb	AT2G13680.1	1	1	.
33128	2	5740323	5740347	5733241	5733265	4	6.5	90	45	0.0792673	TTTA	26			.		.		0		.			.
33137	2	5743721	5743746	5736639	5736664	3	8.7	91	45	0.530293	TCT	26.1			AT2G13770.1	1	.		1	exon	AT2G13770.1	1	2	.
33326	2	5840521	5840544	5833439	5833462	3	8	100	48	0.573207	ATG	24			AT2G13900.1	1	.		1	exon	AT2G13900.1	1	2	.
33358	2	5871501	5871563	5864419	5864481	9	7	92	105	0.35168	GCACCATCT	63			.		.		0		.			.
33403	2	5899540	5899579	5892458	5892497	2	19.5	94	73	1.02508	TA	39			.		AT2G14010.1	1	1	intron	.			.
33424	2	5929948	5929969	5922866	5922887	3	7.3	100	44	0.435838	CTT	21.9			AT2G14070.1	1	.		1	exon	AT2G14070.1	1	2	.
33544	2	5988764	5988785	5981682	5981703	3	7.3	100	44	0.435838	GTT	21.9			AT2G14170.1	1	.		1	exon/DHS	AT2G14170.1	1	2	DHS
33633	2	6051301	6051333	6044219	6044251	2	16.5	93	59	1.08306	TC	33			.		.		0	plus/minus 1kb	AT2G14260.1	1	1	.
33659	2	6063747	6063770	6056665	6056688	3	8	100	48	0.573207	TCC	24			AT2G14288.1	1	.		1	exon	AT2G14290.1	1	2	.
34271	2	6502763	6502784	6495681	6495702	3	7.3	100	44	0.435838	AAG	21.9			.		.		0		.			.
34558	2	6625978	6626001	6618896	6618919	3	8	100	48	0.573207	TTC	24			.		.		0	plus/minus 1kb	AT2G15240.1	1	1	.
34572	2	6637019	6637042	6629937	6629960	2	11.5	91	41	0.868092	AT	23			.		.		0	plus/minus 1kb	AT2G15260.1	1	1		1	2	HS/5'3'	id-332201
34829	2	6745556	6745628	6738474	6738546	2	36.5	100	146	1.39688	CT	73			.		.		0		.			.
34881	2	6797425	6797464	6790343	6790382	4	10	97	59	0.836397	ATAT	40			.		.		0	plus/minus 1kb	AT2G15560.1	1	1	.
34890	2	6800270	6800293	6793188	6793211	2	12.5	91	43	0.949864	TA	25			.		.		0	DHS	AT2G15570.1	1	1	DHS
35001	2	6887871	6887962	6880789	6880880	6	15.2	95	163	1.14588	AGAGAG	91.2			.		.		0	plus/minus 1kb	AT2G15790.1	1	1	.
35091	2	6954378	6954397	6947296	6947315	2	10	100	40	0.855577	TC	20			.		.		0	DHS	AT2G15960.1	1	1	DHS
35201	2	7046908	7046931	7039826	7039849	3	8	100	48	0.573207	ACC	24			AT2G16250.1	1	.		1	exon	AT2G16250.1	1	2	.
35243	2	7082253	7082274	7075171	7075192	3	7.3	100	44	0.435838	ACT	21.9			AT2G16365.1	1	.		1	exon	AT2G16365.1	1	2	.
35379	2	7194051	7194071	7186969	7186989	2	10.5	100	42	0.908802	GA	21			.		.		0	plus/minus 1kb	AT2G16580.1	1	1	.
35425	2	7235841	7235878	7228759	7228796	6	6.3	90	48	0.0989042	TCGGGT	37.8			.		.		0		.			.
35544	2	7331528	7331552	7324446	7324470	3	8.3	100	50	0.6266	TCA	24.9			AT2G16900.1	1	.		1	exon	AT2G16900.1	1	2	.
35556	2	7346007	7346026	7338925	7338944	3	6.7	100	40	0.303382	CAA	20.1			.		AT2G16920.1	1	1	intron	AT2G16920.1	1	2	.
35559	2	7348045	7348077	7340963	7340995	4	8.2	90	54	0.455267	ATTA	32.8			.		.		0	plus/minus 1kb	AT2G16930.2	1	1	.
35655	2	7452288	7452307	7445206	7445225	3	6.7	100	40	0.303382	CCT	20.1			AT2G17110.1	1	.		1	exon	AT2G17110.1	1	2	.
35661	2	7457850	7457870	7450768	7450788	3	7	100	42	0.37134	ATG	21	NC_682_ATG		.		.		0		.			.
35760	2	7575299	7575323	7568217	7568241	3	8.7	91	45	0.530293	TTC	26.1			AT2G17430.1	1	AT2G17430.1	1	2	intron	AT2G17430.1	1	3	.
35831	2	7655434	7655457	7648352	7648375	2	12	90	41	0.895204	CT	24			AT2G17580.1	1	AT2G17580.1	1	2	intron	AT2G17580.1	1	3	.
35839	2	7660318	7660358	7653236	7653276	2	20.5	100	82	0.9501	TA	41			.		.		0	plus/minus 1kb	AT2G17590.1	1	1	.
35885	2	7730325	7730348	7723243	7723266	3	8	100	48	0.573207	ACC	24			AT2G17770.1	1	.		1	exon	AT2G17770.1	1	2	.
35896	2	7739953	7739981	7732871	7732899	2	14.5	92	51	1.05688	GA	29			.		.		0	plus/minus 1kb	AT2G17790.1	1	1	.
35938	2	7811859	7811879	7804777	7804797	2	10.5	100	42	0.908802	TC	21			.		.		0	DHS	AT2G17940.1	1	1	DHS
35997	2	7867519	7867557	7860437	7860475	2	19.5	100	78	0.989118	TA	39			.		.		0	DHS	AT2G18080.1	1	1	DHS
36021	2	7886640	7886667	7879558	7879585	2	14	100	56	1.09696	TA	28			AT2G18130.1	1	AT2G18130.1	1	2	intron	AT2G18130.1	1	3	.
36040	2	7904980	7904999	7897898	7897917	2	10	100	40	0.855577	TA	20			.		.		0	DHS	AT2G18160.1	1	1	DHS
36053	2	7916980	7917003	7909898	7909921	3	8	90	41	0.379879	GAA	24			.		.		0	DHS	AT2G18170.1	1	1	DJS
36055	2	7921418	7921441	7914336	7914359	3	8	90	41	0.379879	TTC	24			AT2G18190.1	1	.		1	exon	AT2G18180.1	1	2	.
36169	2	8028638	8028745	8021556	8021663	2	54	100	216	3.22784	TC	108			.		.		0	DHS	AT2G18490.1	1	1	DHS
36267	2	8165520	8165540	8158438	8158458	3	7	100	42	0.37134	TCT	21			AT2G18840.1	1	.		1	exon	AT2G18840.1	1	2	.
36330	2	8227979	8228006	8220897	8220924	2	14	100	56	1.09696	CT	28			.		.		0	plus/minus 1kb	AT2G18960.1	1	1	.
36333	2	8230020	8230039	8222938	8222957	3	6.7	100	40	0.303382	GTG	20.1			AT2G18960.1	1	AT2G18960.1	1	2	intron/DHS	AT2G18960.1	1	3	DHS
36362	2	8266370	8266390	8259288	8259308	2	10.5	100	42	0.908802	TA	21			AT2G19060.1	1	AT2G19060.1	1	2	intron	AT2G19070.1	1	3	.
36390	2	8303303	8303323	8296221	8296241	3	7	100	42	0.37134	TTC	21			AT2G19130.1	1	.		1	exon	AT2G19130.1	1	2	.
36439	2	8368993	8369022	8361911	8361940	2	15	100	60	1.10325	AG	30			.		.		0	DHS	AT2G19270.1	1	1	DHS
36453	2	8385622	8385667	8378540	8378585	2	23	95	85	0.907607	AT	46			.		.		0	plus/minus 1kb	AT2G19360.1	1	1	.
36573	2	8534347	8534367	8527265	8527285	2	10.5	100	42	0.908802	AG	21			.		.		0	DHS	AT2G19790.1	1	1	DHS
36627	2	8578178	8578200	8571096	8571118	3	8	90	41	0.379879	TTC	24			AT2G19860.1	1	AT2G19860.1	1	2	intron	AT2G19860.1	1	3	.
36642	2	8598343	8598363	8591261	8591281	3	7	100	42	0.37134	GAA	21			.		.		0	plus/minus 1kb	AT2G19893.1	1	1	.
36706	2	8685576	8685634	8678495	8678553	2	29.5	96	111	0.858196	TC	59			AT2G20100.1	1	AT2G20100.1	1	2	intron/DHS	AT2G20100.1	1	3	DHS
36738	2	8726049	8726070	8718968	8718989	2	11	100	44	0.954678	AG	22			.		.		0	DHS	AT2G20190.1	1	1	DHS
36745	2	8747391	8747443	8740310	8740362	2	26.5	92	92	0.872266	GA	53			AT2G20280.1	1	AT2G20280.1	1	2	intron	AT2G20270.1	1	3	.
36806	2	8838442	8838462	8831361	8831381	2	10.5	100	42	0.908802	AG	21			AT2G20480.1	1	AT2G20480.1	1	2	intron	AT2G20490.1	1	3	.
36829	2	8865257	8865280	8858176	8858199	2	11.5	91	41	0.868092	CT	23			.		.		0	DHS	AT2G20570.1	1	1	DHS
36885	2	8907453	8907474	8900372	8900393	2	11	100	44	0.954678	CT	22			.		.		0	DHS	AT2G20635.1	1	1	DHS
36897	2	8927598	8927639	8920517	8920558	7	6.1	97	79	0.137799	TTCATCA	42.7			.		.		0	DHS	AT2G20680.1	1	1	DHS
36918	2	8959218	8959237	8952137	8952156	3	6.7	100	40	0.303382	TCA	20.1			AT2G20790.1	1	.		1	exon	AT2G20790.2	1	2	.
36920	2	8962614	8962649	8955533	8955568	3	12	93	65	0.968154	AAG	36			AT2G20800.1	1	AT2G20800.1	1	2	intron	AT2G20805.1	1	3	.
36928	2	8981391	8981413	8974310	8974332	3	8	90	41	0.379879	GAT	24			AT2G20840.1	1	AT2G20840.1	1	2	intron	AT2G20840.1	1	3	.
36929	2	8981527	8981555	8974446	8974474	2	14.5	92	51	1.05688	GA	29			.		.		0	DHS	AT2G20840.1	1	1	DHS
36944	2	9015754	9015779	9008673	9008698	2	13	100	52	1.07224	AT	26			AT2G20960.1	1	AT2G20960.1	1	2	intron	AT2G20960.1	1	3	.
36971	2	9055313	9055332	9048232	9048251	3	6.7	100	40	0.303382	AAG	20.1			.		AT2G21100.1	1	1	intron	AT2G21100.1	1	2	.
37023	2	9133376	9133422	9126295	9126341	3	15.7	100	94	1.12235	TTC	47.1		3' UTR, AT2G21320	.		.		0	DHS	AT2G21320.1	1	1	DHS
37035	2	9159152	9159175	9152072	9152095	3	8	100	48	0.573207	TCT	24			.		.		0	plus/minus 1kb	AT2G21390.1	1	1	.
37052	2	9192609	9192632	9185529	9185552	2	12.5	91	43	0.949864	TG	25			.		.		0		.			.
37078	2	9225990	9226014	9218910	9218934	3	8.3	90	43	0.438104	AGA	24.9			AT2G21520.1	1	.		1	exon	AT2G21530.1	1	2	.
37079	2	9226494	9226517	9219414	9219437	3	8	100	48	0.573207	TCA	24			AT2G21530.1	1	.		1	exon	AT2G21530.1	1	2	.
37126	2	9284912	9284964	9277832	9277884	2	26.5	100	106	0.808509	TA	53			AT2G21725.1	1	AT2G21725.1	1	2	intron	AT2G21725.1	1	3	.
37130	2	9291433	9291456	9284353	9284376	3	8	90	41	0.379879	GTT	24			.		.		0	plus/minus 1kb	AT2G21770.1	1	1	.
37195	2	9371054	9371075	9363974	9363995	3	7.3	100	44	0.435838	TCT	21.9			AT2G22010.1	1	.		1	exon	AT2G22000.1	1	2	.
37301	2	9485987	9486006	9478907	9478926	3	6.7	100	40	0.303382	GAA	20.1			.		.		0	DHS	AT2G22310.1	1	1	DHS
37320	2	9502642	9502674	9495562	9495594	2	16.5	100	66	1.08521	AT	33			AT2G22345.1	1	AT2G22345.1	1	2	intron	AT2G22345.1	1	3	.
37359	2	9561256	9561286	9554176	9554206	3	10.3	92	55	0.785797	TTG	30.9			AT2G22490.1	1	.		1	exon	AT2G22490.1	1	2	.
37609	2	9792755	9792785	9785675	9785705	5	6.2	92	55	0.0639212	ACAAC	31			.		.		0	DHS	AT2G22990.1	1	1	DHS
37627	2	9802178	9802201	9795098	9795121	2	11.5	91	41	0.868092	AT	23			AT2G23000.1	1	AT2G23000.1	1	2	intron	AT2G23000.1	1	3	.
37649	2	9813787	9813811	9806707	9806731	2	12.5	100	50	1.05197	AT	25			.		.		0	DHS	AT2G23030.1	1	1	DHS
37836	2	10040165	10040188	10033085	10033108	2	12	100	48	1.02588	AT	24			.		.		0	DHS	AT2G23570.1	1	1	DHS
37901	2	10093584	10093607	10086504	10086527	3	8	100	48	0.573207	GAT	24			.		.		0		.			.
37932	2	10120045	10120068	10112965	10112988	2	12	100	48	1.02588	AG	24			.		AT2G23760.2	1	1	intron/DHS	AT2G23760.1	1	2	DHS
37943	2	10128406	10128429	10121326	10121349	3	8	100	48	0.573207	GGA	24			AT2G23770.1	1	.		1	exon	AT2G23770.1	1	2	.
38028	2	10206753	10206775	10199673	10199695	3	7.7	100	46	0.516554	AAC	23.1			.		.		0	plus/minus 1kb	AT2G23970.1	1	1	.
38030	2	10213010	10213030	10205930	10205950	2	10.5	100	42	0.908802	TA	21			AT2G23985.1	1	AT2G23985.1	1	2	intron	AT2G23990.2	1	3	.
38044	2	10234916	10234939	10227836	10227859	2	12	90	41	0.895204	AC	24			AT2G24050.1	1	AT2G24050.1	1	2	intron	AT2G24050.1	1	3	.
38045	2	10238379	10238452	10231299	10231372	6	12.3	94	134	1.05275	CTGAGC	73.8			AT2G24060.1	1	.		1	exon	AT2G24060.1	1	2	.
38065	2	10265392	10265416	10258312	10258336	3	8.3	90	43	0.438104	TTC	24.9			AT2G24130.1	1	.		1	exon	AT2G24130.1	1	2		1
38115	2	10336838	10336857	10329758	10329777	2	10	100	40	0.855577	AG	20			.		.		0	DHS	AT2G24270.2	1	1	DHS
38119	2	10340523	10340543	10333443	10333463	3	7	100	42	0.37134	CTT	21	NC_692_CTT		.		.		0		.			.
38155	2	10392597	10392622	10385517	10385542	2	13	100	52	1.07224	AT	26			AT2G24430.1	1	AT2G24430.1	1	2	intron	AT2G24430.1	1	3	.
38191	2	10440690	10440714	10433611	10433635	3	8.3	90	43	0.438104	ATA	24.9			.		.		0	plus/minus 1kb	AT2G24560.1	1	1	.
38220	2	10463789	10463808	10456710	10456729	3	6.7	100	40	0.303382	TCA	20.1			.		.		0	DHS	AT2G24610.1	1	1	DHS
38221	2	10463913	10463932	10456834	10456853	3	6.7	100	40	0.303382	AAC	20.1			.		.		0	plus/minus 1kb	AT2G24610.1	1	1	.
38299	2	10539312	10539342	10532233	10532263	2	15.5	93	48	1.08081	AT	31			.		.		0	DHS	AT2G24740.1	1	1	DHS
38334	2	10563037	10563082	10555958	10556003	4	11.5	92	78	0.941077	ATAT	46			.		.		0		.			.
38349	2	10595321	10595343	10588242	10588264	3	8	90	41	0.379879	TTC	24			.		.		0	DHS	AT2G24860.1	1	1	DHS
38510	2	10733876	10733909	10726797	10726830	2	17	100	68	1.07348	AG	34			AT2G25180.1	1	AT2G25180.1	1	2	intron/DHS	AT2G25180.1	1	3	DHS
38522	2	10742411	10742435	10735332	10735356	3	8.3	90	43	0.438104	CTT	24.9			AT2G25190.1	1	.		1	exon	AT2G25190.1	1	2	.
38530	2	10752643	10752664	10745564	10745585	3	7.3	100	44	0.435838	GAA	21.9			.		.		0	DHS	AT2G25220.1	1	1	DHS
38549	2	10778152	10778187	10771073	10771108	2	18	100	72	1.04375	AT	36			.		.		0	plus/minus 1kb	AT2G25295.1	1	1	.
38584	2	10830479	10830501	10823400	10823422	3	7.7	100	46	0.516554	GGA	23.1			AT2G25430.1	1	.		1	exon	AT2G25430.1	1	2	.
38601	2	10857120	10857155	10850042	10850077	2	18	94	65	1.06283	TA	36			AT2G25490.1	1	AT2G25490.1	1	2	intron	AT2G25490.1	1	3	.
38641	2	10921989	10922018	10914911	10914940	3	10	92	53	0.747237	GAA	30			AT2G25650.1	1	.		1	exon	AT2G25650.1	1	2	.
38753	2	11069798	11069819	11062720	11062741	3	7.3	100	44	0.435838	CAA	21.9	CD_62_CAA_elf3		AT2G25930.1	1	.		1	exon	AT2G25930.1	1	2	.
38797	2	11119175	11119208	11112097	11112130	2	17	100	68	1.07348	AT	34			AT2G26080.1	1	AT2G26080.1	1	2	intron	AT2G26080.1	1	3	.
38860	2	11171763	11171782	11164685	11164704	3	6.7	100	40	0.303382	TCT	20.1			.		.		0	DHS	AT2G26230.1	1	1	DHS
38962	2	11300164	11300191	11293086	11293113	3	9	92	49	0.598838	TCT	27			AT2G26550.1	1	.		1	exon	AT2G26560.1	1	2	.
38990	2	11323835	11323855	11316757	11316777	3	7	100	42	0.37134	TTC	21			AT2G26600.1	1	AT2G26600.2	1	2	intron	AT2G26600.1	1	3	.
39003	2	11345121	11345158	11338043	11338080	2	19.5	94	71	1.02508	TA	39			.		.		0	DHS	AT2G26660.1	1	1	DHS
39007	2	11357755	11357777	11350677	11350699	2	11.5	100	46	0.993576	TA	23			AT2G26690.1	1	AT2G26690.1	1	2	intron/DHS	AT2G26690.1	1	3	DHS
39105	2	11420914	11420936	11413836	11413858	2	11.5	100	46	0.993576	TA	23			AT2G26780.1	1	AT2G26780.1	1	2	intron	AT2G26780.1	1	3	.
39126	2	11446220	11446247	11439142	11439169	4	7	91	42	0.217201	ATAT	28			AT2G26820.1	1	AT2G26820.1	1	2	intron	AT2G26820.1	1	3	.
39138	2	11461057	11461109	11453979	11454031	2	26.5	100	106	0.808509	AT	53			.		.		0	DHS	AT2G26860.1	1	1	DHS
39189	2	11525412	11525452	11518334	11518374	2	20.5	100	82	0.9501	TA	41			AT2G26980.4	1	AT2G26980.4	1	2	intron/DHS	AT2G26980.3	1	3	DHS
39206	2	11539102	11539128	11532024	11532050	3	8.7	92	47	0.548103	TTC	26.1			.		.		0	DHS	AT2G27030.1	1	1	DHS
39220	2	11552844	11552866	11545766	11545788	2	11.5	100	46	0.993576	TC	23			.		.		0	DHS	AT2G27050.1	1	1	DHS
39221	2	11555097	11555124	11548019	11548046	3	9.3	100	56	0.78188	AGC	27.9			AT2G27050.1	1	.		1	exon	AT2G27050.1	1	2	.
39224	2	11558093	11558116	11551015	11551038	3	7.7	90	41	0.31861	CTT	23.1			.		.		0	plus/minus 1kb	AT2G27060.1	1	1	.
39393	2	11759112	11759137	11752034	11752059	2	13	100	52	1.07224	AT	26			.		.		0	DHS	AT2G27500.1	1	1	DHS
39427	2	11807008	11807071	11799931	11799994	6	10.7	91	93	0.896381	TCAACA	64.2			AT2G27660.1	1	.		1	exon/DHS	AT2G27660.1	1	2	DHS
39446	2	11831908	11831928	11824831	11824851	2	10.5	100	42	0.908802	AG	21			.		.		0	DHS	AT2G27750.1	1	1	DHS
39513	2	11930068	11930088	11922991	11923011	3	7	100	42	0.37134	ATC	21			AT2G27990.1	1	.		1	exon	AT2G27990.1	1	2	.
39528	2	11947342	11947396	11940265	11940319	2	28	92	91	0.864232	AT	56			.		.		0	plus/minus 1kb	AT2G28050.1	1	1	.
39533	2	11950168	11950211	11943091	11943134	6	7.3	94	81	0.375149	CTCAAA	43.8			.		.		0		.			.
39534	2	11950678	11950703	11943601	11943626	2	12.5	92	45	0.963768	AG	25			.		.		0		.			.
39535	2	11951522	11951571	11944445	11944494	2	25	95	93	0.86013	AT	50			.		.		0		.			.
39663	2	12091654	12091680	12084577	12084603	4	6.8	100	54	0.336792	TTTC	27.2			.		.		0	plus/minus 1kb	AT2G28305.1	1	1	.
39875	2	12311446	12311486	12304369	12304409	2	20.5	100	82	0.9501	AT	41			AT2G28680.1	1	AT2G28680.1	1	2	intron	AT2G28680.1	1	3	.
40016	2	12492833	12492855	12485756	12485778	3	7.7	100	46	0.516554	GAA	23.1			AT2G29060.1	1	.		1	exon	AT2G29060.1	1	2	.
40100	2	12607365	12607413	12600288	12600336	6	8.5	90	69	0.574121	AGAAAA	51			.		.		0	plus/minus 1kb	AT2G29350.2	1	1	.
40257	2	12828154	12828177	12821077	12821100	3	8	100	48	0.573207	CAA	24			.		.		0	DHS	AT2G30040.1	1	1	DHS
40272	2	12842110	12842131	12835033	12835054	2	11	100	44	0.954678	TC	22			.		.		0	plus/minus 1kb	AT2G30070.1	1	1	.
40365	2	12974349	12974377	12967272	12967300	2	14.5	100	58	1.1022	AT	29			.		.		0	DHS	AT2G30430.1	1	1	DHS
40391	2	13009110	13009149	13002033	13002072	3	13.3	100	80	1.10262	AGG	39.9			AT2G30505.1	1	.		1	exon	AT2G30520.1	1	2	.
40396	2	13018801	13018831	13011724	13011754	2	15.5	100	62	1.10049	TG	31			.		.		0	DHS	AT2G30530.1	1	1	DHS
40416	2	13041426	13041461	13034349	13034384	3	12	100	72	1.04471	ACA	36	CD_72_ACA_wrky21		AT2G30590.1	1	.		1	exon	AT2G30590.1	1	2	.
40457	2	13092474	13092501	13085397	13085424	3	9.3	100	56	0.78188	TCA	27.9			.		.		0	DHS	AT2G30710.1	1	1	DHS
40459	2	13101850	13101875	13094773	13094798	2	13	100	52	1.07224	AT	26			.		.		0	DHS	AT2G30730.1	1	1	DHS
40497	2	13152936	13152958	13145859	13145881	3	7.7	100	46	0.516554	AGA	23.1			.		.		0	DHS	AT2G30880.1	1	1	DHS
40505	2	13173327	13173350	13166250	13166273	2	12	100	48	1.02588	AT	24			AT2G30933.1	1	AT2G30933.1	1	2	intron	AT2G30933.1	1	3	.
40507	2	13173771	13173796	13166694	13166719	2	13	91	45	0.982079	AG	26			.		.		0	plus/minus 1kb	AT2G30933.1	1	1	.
40518	2	13185017	13185041	13177940	13177964	3	8.3	90	43	0.438104	CTT	24.9			AT2G30960.1	1	.		1	exon	AT2G30960.1	1	2	.
40524	2	13192740	13192794	13185663	13185717	2	27.5	100	110	0.815881	AG	55			AT2G30980.1	1	AT2G30980.1	1	2	intron/DHS	AT2G30980.1	1	3	DHS
40529	2	13201291	13201321	13194214	13194244	3	10.3	100	62	0.904241	CTT	30.9			.		.		0	DHS	AT2G31005.1	1	1	DHS
40629	2	13298236	13298259	13291159	13291182	2	12	90	41	0.895204	AT	24			.		.		0	DHS	AT2G31190.1	1	1	DHS
40720	2	13424495	13424519	13417418	13417442	3	8.3	100	50	0.6266	TTC	24.9	IN_462_TTC_ari7		AT2G31510.1	1	AT2G31510.1	1	2	intron	AT2G31510.1	1	3	.
40727	2	13438030	13438066	13430953	13430989	2	18.5	100	74	1.02652	AT	37			AT2G31540.1	1	AT2G31540.1	1	2	intron	AT2G31540.1	1	3	.
40877	2	13622425	13622450	13615348	13615373	2	13	100	52	1.07224	AT	26			AT2G31985.1	1	AT2G31985.1	1	2	intron	AT2G31985.1	1	3	.
40905	2	13651037	13651059	13643960	13643982	3	7.7	100	46	0.516554	CCT	23.1			AT2G32080.1	1	.		1	exon	AT2G32090.1	1	2	.
40912	2	13664075	13664100	13656998	13657023	3	8.7	91	45	0.530293	AGA	26.1			AT2G32140.1	1	.		1	exon	AT2G32140.1	1	2	.
40919	2	13671192	13671214	13664115	13664137	2	11.5	100	46	0.993576	TA	23			AT2G32160.1	1	AT2G32160.1	1	2	intron	AT2G32160.1	1	3	.
40924	2	13683021	13683076	13675944	13675999	2	28	100	112	0.823882	AT	56			.		.		0	plus/minus 1kb	AT2G32190.1	1	1	.
40951	2	13732926	13732959	13725849	13725882	3	11.3	100	68	0.996479	ATC	33.9			AT2G32310.1	1	AT2G32310.2	1	2	intron	AT2G32310.1	1	3	.
41013	2	13831684	13831762	13824607	13824685	2	39.5	100	158	1.7473	AG	79			.		.		0	DHS	AT2G32560.1	1	1	DHS
41026	2	13867156	13867207	13860079	13860130	3	17	90	85	1.09763	CTT	51			AT2G32680.1	1	.		1	exon	AT2G32670.1	1	2	.
41039	2	13880438	13880476	13873361	13873399	2	19.5	100	78	0.989118	AG	39			.		.		0	DHS	AT2G32710.2	1	1	DHS
41047	2	13883260	13883282	13876183	13876205	3	8	90	41	0.379879	CAT	24			.		.		0	DHS	AT2G32720.1	1	1	DHS
41068	2	13913374	13913393	13906297	13906316	2	10	100	40	0.855577	GA	20			.		.		0	DHS	AT2G32790.1	1	1	DHS
41076	2	13932828	13932862	13925751	13925785	3	11.7	100	70	1.0256	GAA	35.1			.		.		0	plus/minus 1kb	AT2G32820.1	1	1	.
41105	2	14004710	14004741	13997633	13997664	3	10.7	100	64	0.944588	TCT	32.1			AT2G32980.1	1	.		1	exon	AT2G32980.1	1	2	.
41172	2	14131059	14131082	14123982	14124005	3	8	90	41	0.379879	GAA	24			AT2G33330.1	1	.		1	exon	AT2G33330.1	1	2	.
41183	2	14149291	14149312	14142215	14142236	3	7.3	100	44	0.435838	GAA	21.9			AT2G33360.1	1	.		1	exon	AT2G33360.1	1	2	.
41222	2	14202377	14202422	14195301	14195346	3	15.3	95	78	1.10827	AAG	45.9	CD_82_AAG_unk		AT2G33510.1	1	.		1	exon	AT2G33510.1	1	2	.
41230	2	14224601	14224622	14217525	14217546	3	7.3	100	44	0.435838	CAC	21.9			AT2G33570.1	1	.		1	exon	AT2G33570.1	1	2	.
41308	2	14338353	14338386	14331277	14331310	3	11.3	100	68	0.996479	ACA	33.9	NC_702_ACA		.		.		0	DHS/non gene	.			DHS
41320	2	14349745	14349771	14342666	14342692	3	9	91	47	0.581349	TGT	27			AT2G33880.1	1	.		1	exon	AT2G33880.1	1	2	.
41339	2	14380868	14380913	14373789	14373834	5	9.2	95	85	0.71877	GAAGA	46			.		.		0	plus/minus 1kb	AT2G34020.1	1	1	.
41355	2	14408506	14408530	14401427	14401451	3	8.3	100	50	0.6266	TGA	24.9			AT2G34100.1	1	AT2G34100.1	1	2	intron	AT2G34100.1	1	3	.
41426	2	14489853	14489886	14482774	14482807	4	8.5	93	61	0.55636	TTTG	34			AT2G34315.1	1	AT2G34315.1	1	2	intron	AT2G34315.1	1	3	.
41446	2	14525609	14525645	14518530	14518566	3	12.3	100	74	1.06157	TCT	36.9	HS_332_TCT_lhb1b1		.		.		0	plus/minus 1kb	AT2G34400.1	1	1		1	2	HS/5'3'	id-726629
41460	2	14548342	14548361	14541263	14541282	3	6.7	100	40	0.303382	AGA	20.1			.		.		0	DHS	AT2G34500.1	1	1	DHS
41464	2	14555196	14555225	14548117	14548146	3	9.3	92	46	0.646654	CAT	27.9			.		AT2G34520.1	1	1	intron	AT2G34530.1	1	2	.
41521	2	14630108	14630127	14623029	14623048	2	10	100	40	0.855577	AT	20			AT2G34680.1	1	AT2G34680.1	1	2	intron	AT2G34680.1	1	3	.
41598	2	14709600	14709679	14702521	14702600	3	26.7	100	160	0.84183	AGA	80.1			.		.		0	DHS	AT2G34840.1	1	1	DHS
41653	2	14799930	14799970	14792851	14792891	2	21	95	77	0.970406	AT	42			AT2G35090.1	1	AT2G35090.1	1	2	intron	AT2G35090.1	1	3	.
41680	2	14850608	14850653	14843529	14843574	6	7.7	92	57	0.441507	CTCAAC	46.2			AT2G35230.1	1	.		1	exon	AT2G35230.1	1	2	.
41695	2	14878820	14878845	14871741	14871766	4	6.8	95	47	0.230429	TTTG	27.2			.		.		0	plus/minus 1kb	AT2G35340.1	1	1	.
41706	2	14897368	14897389	14890289	14890310	3	7.3	100	44	0.435838	ATC	21.9			AT2G35360.1	1	.		1	exon	AT2G35370.1	1	2	.
41720	2	14929456	14929486	14922377	14922407	5	6.2	100	62	0.202968	TTTTC	31			AT2G35520.1	1	AT2G35520.1	1	2	intron	AT2G35530.1	1	3	.
41721	2	14933292	14933316	14926213	14926237	2	12.5	100	50	1.05197	TA	25			.		AT2G35530.1	1	1	intron	AT2G35530.1	1	2	.
41748	2	14988038	14988057	14980959	14980978	2	10	100	40	0.855577	TA	20			.		.		0	DHS	AT2G35635.1	1	1	DHS
41752	2	14992601	14992637	14985522	14985558	4	9.2	90	53	0.630275	AGAG	36.8			.		.		0	DHS	AT2G35650.1	1	1	DHS
41756	2	14999844	14999883	14992765	14992804	3	13.3	94	73	1.05514	TGA	39.9			AT2G35670.1	1	.		1	exon	AT2G35670.1	1	2	.
41898	2	15225528	15225548	15218449	15218469	3	7	100	42	0.37134	GTT	21	NC_712_GTT		.		.		0		.			.
41903	2	15236144	15236167	15229065	15229088	3	8	90	41	0.379879	CAT	24			.		.		0	DHS	AT2G36320.1	1	1	DHS
41904	2	15236245	15236273	15229166	15229194	2	14.5	92	51	1.05688	TC	29			.		AT2G36320.1	1	1	intron	AT2G36320.1	1	2	.
41915	2	15274090	15274111	15267011	15267032	2	11	100	44	0.954678	AT	22			AT2G36390.1	1	AT2G36390.1	1	2	intron	AT2G36390.1	1	3	.
41916	2	15276954	15276973	15269875	15269894	3	6.7	100	40	0.303382	GAT	20.1			AT2G36390.1	1	.		1	exon	AT2G36400.1	1	2	.
41937	2	15306870	15306895	15299791	15299816	3	9	91	47	0.581349	TCC	27			AT2G36470.1	1	.		1	exon	AT2G36470.1	1	2	.
41951	2	15335274	15335299	15328195	15328220	2	13	91	45	0.982079	TA	26			AT2G36550.1	1	AT2G36550.1	1	2	intron	AT2G36550.1	1	3	.
42022	2	15421652	15421690	15414573	15414611	2	19.5	94	71	1.02508	TG	39			.		.		0	DHS	AT2G36770.1	1	1	DHS
42136	2	15603647	15603699	15596568	15596620	6	8.8	97	99	0.694679	AAACTC	52.8	NC_722_AAACTC		.		.		0		.			.
42180	2	15705314	15705335	15698235	15698256	3	7.3	100	44	0.435838	ATG	21.9			AT2G37410.1	1	.		1	exon	AT2G37400.1	1	2	.
42252	2	15809782	15809807	15802704	15802729	2	13	91	45	0.982079	AG	26			.		.		0	DHS	AT2G37680.1	1	1	DHS
42257	2	15823998	15824017	15816920	15816939	3	6.7	100	40	0.303382	GAA	20.1			AT2G37710.1	1	.		1	exon/DHS	AT2G37710.1	1	2	DHS
42272	2	15835953	15835973	15828875	15828895	3	7	100	42	0.37134	AAT	21			.		.		0	DHS	AT2G37740.1	1	1	DHS
42326	2	15896322	15896341	15889244	15889263	3	6.7	100	40	0.303382	AGA	20.1			.		.		0	plus/minus 1kb	AT2G37960.1	1	1	.
42339	2	15913977	15913996	15906899	15906918	3	6.7	100	40	0.303382	TTC	20.1			AT2G38010.1	1	.		1	exon	AT2G38010.1	1	2	.
42356	2	15952252	15952282	15945174	15945204	2	15.5	100	62	1.10049	TC	31			.		.		0	DHS	AT2G38090.1	1	1	DHS
42382	2	15983491	15983514	15976413	15976436	2	12	90	41	0.895204	TC	24			AT2G38120.1	1	AT2G38120.1	1	2	intron/DHS	AT2G38120.1	1	3	DHS
42385	2	15987799	15987835	15980721	15980757	6	6.2	96	67	0.133529	GAACAA	37.2			.		.		0	DHS	AT2G38140.1	1	1	DHS
42583	2	16249138	16249165	16242060	16242087	3	9.3	92	49	0.646654	TCT	27.9			AT2G38890.1	1	.		1	exon	AT2G38890.1	1	2	.
42619	2	16298947	16298987	16291869	16291909	2	20.5	100	82	0.9501	TC	41			AT2G39010.1	1	AT2G39010.1	1	2	intron	AT2G39010.1	1	3	.
42622	2	16303291	16303311	16296213	16296233	3	7	100	42	0.37134	TGA	21			.		.		0	plus/minus 1kb	AT2G39020.1	1	1	.
42712	2	16399096	16399115	16392018	16392037	3	6.7	100	40	0.303382	TTC	20.1			.		.		0	DHS	AT2G39260.1	1	1	DHS
42729	2	16439551	16439586	16432473	16432508	3	12	100	72	1.04471	AGA	36			.		.		0	plus/minus 1kb	AT2G39350.1	1	1	.
42757	2	16502104	16502127	16495026	16495049	4	6.2	95	43	0.0798214	ATAA	24.8			.		.		0	plus/minus 1kb	AT2G39518.1	1	1	.
42819	2	16604642	16604666	16597564	16597588	3	8.3	100	50	0.6266	ATG	24.9			AT2G39795.1	1	.		1	exon	AT2G39800.2	1	2	.
42850	2	16652207	16652240	16645129	16645162	4	8.5	90	47	0.511214	ATAT	34			.		.		0	plus/minus 1kb	AT2G39870.1	1	1	.
42965	2	16831426	16831450	16824348	16824372	3	8.3	90	43	0.438104	AAC	24.9			.		.		0	DHS	AT2G40270.2	1	1	DHS
43048	2	16932848	16932884	16925770	16925806	3	12.3	94	67	0.999768	TTC	36.9			.		.		0	plus/minus 1kb	AT2G40520.1	1	1	.
43055	2	16947982	16948002	16940904	16940924	3	7	100	42	0.37134	TTC	21			.		.		0	DHS	AT2G40570.1	1	1	DHS
43058	2	16964027	16964051	16956949	16956973	2	12.5	91	43	0.949864	AG	25			.		.		0	DHS	AT2G40620.1	1	1	DHS
43108	2	17037370	17037400	17030292	17030322	3	10.3	92	48	0.785797	AAT	30.9			.		.		0		.			.
43114	2	17043762	17043781	17036684	17036703	3	6.7	100	40	0.303382	TTC	20.1			AT2G40820.1	1	AT2G40820.1	1	2	intron	AT2G40820.1	1	3	.
43118	2	17051485	17051506	17044407	17044428	3	7.3	100	44	0.435838	AGT	21.9			AT2G40830.2	1	.		1	exon	AT2G40830.2	1	2	.
43135	2	17081261	17081288	17074183	17074210	2	14	100	56	1.09696	AT	28			.		.		0	DHS	AT2G40920.1	1	1	DHS
43144	2	17114040	17114164	17106962	17107086	2	63	95	231	2.36142	CT	126			AT2G40990.1	1	AT2G40990.1	1	2	intron	AT2G40990.1	1	3	.
43147	2	17115561	17115616	17108483	17108538	3	18.7	100	112	1.04619	AAG	56.1			.		.		0	plus/minus 1kb	AT2G40995.1	1	1	.
43174	2	17167511	17167530	17160433	17160452	3	6.7	100	40	0.303382	CTA	20.1			AT2G41170.1	1	.		1	exon	AT2G41170.1	1	2	.
43175	2	17167972	17167994	17160894	17160916	2	11.5	100	46	0.993576	AG	23			.		.		0	DHS	AT2G41170.1	1	1	DHS
43371	2	17479637	17479670	17472559	17472592	3	11.3	100	68	0.996479	AAG	33.9			.		.		0	DHS	AT2G41870.1	1	1	DHS
43377	2	17486781	17486804	17479703	17479726	3	8	100	48	0.573207	TTC	24			AT2G41890.1	1	.		1	exon	AT2G41890.1	1	2	.
43453	2	17573297	17573318	17566219	17566240	3	7.3	100	44	0.435838	CTT	21.9			.		.		0	DHS	AT2G42130.1	1	1	DHS
43472	2	17596183	17596225	17589105	17589147	3	14.3	100	86	1.12285	ACA	42.9	CD_51_ACA_spi9	exon, AT2G42200, SPL9, squamosa promoter binding protein-like 9	AT2G42200.1	1	.		1	exon	AT2G42200.1	1	2	.
43494	2	17644033	17644052	17636955	17636974	3	6.7	100	40	0.303382	GGT	20.1			AT2G42340.1	1	.		1	exon	AT2G42340.1	1	2	.
43528	2	17695632	17695657	17688554	17688579	3	8.7	91	45	0.530293	TCA	26.1			AT2G42480.1	1	.		1	exon	AT2G42480.1	1	2	.
43532	2	17702730	17702751	17695652	17695673	3	7.3	100	44	0.435838	AAG	21.9			.		.		0	plus/minus 1kb	AT2G42490.1	1	1	.
43538	2	17708434	17708489	17701356	17701411	2	28.5	90	93	0.88579	TC	57			.		.		0	DHS	AT2G42500.1	1	1	DHS
43566	2	17755526	17755546	17748449	17748469	3	7	100	42	0.37134	AAG	21			AT2G42610.1	1	.		1	exon	AT2G42610.1	1	2	.
43582	2	17789517	17789559	17782440	17782482	6	7.3	97	81	0.410409	TCTTCA	43.8	CD_92_TCTTCA_rib		AT2G42710.1	1	.		1	exon	AT2G42700.1	1	2	.
43587	2	17803655	17803682	17796578	17796605	3	9.3	100	56	0.78188	TCT	27.9			AT2G42760.1	1	.		1	exon	AT2G42760.1	1	2	.
43602	2	17829525	17829548	17822448	17822471	2	12	90	41	0.895204	TA	24			AT2G42830.1	1	AT2G42830.1	1	2	intron	AT2G42830.1	1	3	.
43618	2	17844095	17844118	17837018	17837041	3	8	90	41	0.379879	TCT	24			AT2G42870.1	1	.		1	exon	AT2G42870.1	1	2	.
43670	2	17921880	17921906	17914803	17914829	3	9	100	54	0.738874	AGA	27			.		.		0	DHS	AT2G43070.1	1	1	DHS
43791	2	18152663	18152719	18145586	18145642	2	29	94	102	0.854679	CT	58			.		.		0	DHS	AT2G43800.1	1	1	DHS
43826	2	18207060	18207087	18199984	18200011	2	13.5	92	49	1.02035	CT	27			AT2G43945.1	1	.		1	exon	AT2G43945.1	1	2	.
43830	2	18212759	18212783	18205683	18205707	3	8.3	100	50	0.6266	TGA	24.9			AT2G43970.1	1	.		1	exon	AT2G43970.1	1	2	.
43880	2	18321834	18321891	18314758	18314815	3	19.3	96	109	1.0379	CAA	57.9	CD_102_CAA_unk		AT2G44340.1	1	.		1	exon/DHS	AT2G44340.1	1	2	DHS
43894	2	18336743	18336763	18329667	18329687	3	7	100	42	0.37134	ACA	21			AT2G44410.1	1	.		1	exon	AT2G44420.1	1	2	.
43898	2	18341027	18341053	18333951	18333977	3	8.7	95	47	0.596826	GAA	26.1			AT2G44430.1	1	.		1	exon	AT2G44430.1	1	2	.
43900	2	18345663	18345688	18338587	18338612	3	8.7	91	45	0.530293	TCC	26.1			AT2G44440.1	1	.		1	exon	AT2G44440.1	1	2		1
43954	2	18459614	18459639	18452539	18452564	3	8.7	91	45	0.530293	CAT	26.1			AT2G44750.1	1	AT2G44750.1	1	2	intron	AT2G44760.1	1	3	.
43969	2	18497271	18497294	18490196	18490219	3	8.3	90	43	0.438104	TGT	24.9			.		.		0	plus/minus 1kb	AT2G44830.1	1	1	.
43970	2	18501711	18501737	18494636	18494662	2	14	92	49	1.04094	CT	28			.		.		0	plus/minus 1kb	AT2G44840.1	1	1	.
44023	2	18590594	18590614	18583519	18583539	3	7	100	42	0.37134	GGA	21			AT2G45050.1	1	.		1	exon	AT2G45050.1	1	2	.
44039	2	18606888	18606908	18599813	18599833	2	10.5	100	42	0.908802	TA	21			AT2G45110.1	1	AT2G45110.1	1	2	intron	AT2G45110.1	1	3	.
44040	2	18607634	18607655	18600559	18600580	2	11	100	44	0.954678	TA	22			AT2G45110.1	1	AT2G45110.1	1	2	intron	AT2G45110.1	1	3	.
44046	2	18627167	18627187	18620092	18620112	2	10.5	100	42	0.908802	AG	21			.		.		0	DHS	AT2G45160.1	1	1	DHS
44048	2	18630911	18630930	18623836	18623855	2	10	100	40	0.855577	TA	20			.		.		0	DHS	AT2G45170.1	1	1	DHS
44064	2	18652140	18652169	18645066	18645095	2	15	100	60	1.10325	AT	30			AT2G45220.1	1	AT2G45220.1	1	2	intron	AT2G45220.1	1	3	.
44076	2	18689393	18689445	18682319	18682371	3	17.7	100	106	1.07941	TCT	53.1			.		.		0	plus/minus 1kb	AT2G45310.1	1	1	.
44082	2	18713262	18713281	18706188	18706207	3	6.7	100	40	0.303382	GTT	20.1	CD_112_GTT_ben1		AT2G45400.1	1	.		1	exon/DHS	AT2G45400.1	1	2	DHS
44117	2	18763718	18763737	18756644	18756663	3	6.7	100	40	0.303382	AGC	20.1			AT2G45530.1	1	.		1	exon/DHS	AT2G45530.1	1	2	DHS
44124	2	18786558	18786578	18779484	18779504	2	10.5	100	42	0.908802	TC	21			.		.		0	DHS	AT2G45570.1	1	1	DHS
44128	2	18792327	18792349	18785253	18785275	3	7.7	100	46	0.516554	CTT	23.1			.		.		0	DHS	AT2G45580.1	1	1	DHS
44135	2	18800726	18800745	18793652	18793671	3	6.7	100	40	0.303382	CTC	20.1			AT2G45620.1	1	.		1	exon	AT2G45620.1	1	2	.
44199	2	18885758	18885779	18878684	18878705	3	7.3	100	44	0.435838	TGA	21.9			AT2G45880.1	1	.		1	exon/DHS	AT2G45880.1	1	2	DHS
44208	2	18905518	18905557	18898445	18898484	2	20	94	73	1.01031	AT	40			.		.		0	DHS	AT2G45910.1	1	1	DHS
44218	2	18930171	18930201	18923098	18923128	2	15.5	100	62	1.10049	TC	31			.		.		0	plus/minus 1kb	AT2G46020.2	1	1	.
44219	2	18930490	18930536	18923417	18923463	6	7.8	90	59	0.441582	GCAGCA	46.8			AT2G46020.2	1	.		1	exon	AT2G46020.2	1	2	.
44222	2	18931004	18931026	18923931	18923953	3	7.7	100	46	0.516554	CAA	23.1			AT2G46020.2	1	.		1	exon	AT2G46020.2	1	2	.
44224	2	18940344	18940366	18933271	18933293	3	7.7	100	46	0.516554	AAG	23.1			AT2G46030.1	1	AT2G46030.1	1	2	intron	AT2G46030.1	1	3	.
44225	2	18940509	18940533	18933436	18933460	3	8.3	90	43	0.438104	TTC	24.9			.		.		0	DHS	AT2G46030.1	1	1	DHS
44238	2	18978095	18978129	18971022	18971056	3	12	93	65	0.968154	GAA	36			AT2G46180.1	1	AT2G46180.1	1	2	intron	AT2G46190.1	1	3	.
44240	2	18979693	18979724	18972620	18972651	4	8	100	64	0.585376	TTTC	32			AT2G46190.1	1	AT2G46190.1	1	2	intron/DHS	AT2G46190.1	1	3	DHS
44242	2	18986947	18986966	18979874	18979893	3	6.7	100	40	0.303382	GAA	20.1			AT2G46220.1	1	.		1	exon	AT2G46210.1	1	2	.
44267	2	19034002	19034033	19026929	19026960	3	10.3	93	57	0.800316	GAA	30.9			.		AT2G46340.1	1	1	intron	AT2G46340.1	1	2	.
44268	2	19034333	19034357	19027260	19027284	3	8.3	100	50	0.6266	AGA	24.9			.		.		0	plus/minus 1kb	AT2G46340.1	1	1	.
44309	2	19107522	19107615	19100450	19100543	2	47.5	97	183	2.28895	AG	95			.		.		0	DHS	AT2G46520.1	1	1	DHS
44327	2	19141890	19141909	19134819	19134838	3	6.7	100	40	0.303382	AAT	20.1			AT2G46590.1	1	.		1	exon	AT2G46590.1	1	2	.
44414	2	19252818	19252837	19245749	19245768	3	6.7	100	40	0.303382	CTT	20.1			.		.		0	DHS	AT2G46830.1	1	1	DHS
44476	2	19347751	19347781	19340681	19340711	3	10.3	92	48	0.785797	TTG	30.9			.		.		0	plus/minus 1kb	AT2G47070.1	1	1	.
44488	2	19360466	19360486	19353396	19353416	3	7	100	42	0.37134	AAT	21			.		.		0	plus/minus 1kb	AT2G47150.1	1	1	.
44546	2	19469649	19469676	19462579	19462606	3	9.3	92	42	0.646654	AAC	27.9			AT2G47430.1	1	AT2G47430.1	1	2	intron	AT2G47430.1	1	3	.
44556	2	19479935	19479959	19472865	19472889	3	8.3	90	43	0.438104	TCT	24.9			AT2G47450.1	1	.		1	exon	AT2G47450.1	1	2		1
44583	2	19528931	19528955	19521861	19521885	2	12.5	100	50	1.05197	AC	25			.		.		0	DHS	AT2G47590.1	1	1	DHS
44597	2	19550043	19550067	19542973	19542997	3	8.3	100	50	0.6266	GAG	24.9			AT2G47660.1	1	.		1	exon/DHS	AT2G47660.1	1	2	DHS
44604	2	19565397	19565419	19558327	19558349	3	7.7	100	46	0.516554	TCT	23.1			AT2G47730.1	1	.		1	exon	AT2G47730.1	1	2	.
44606	2	19570060	19570091	19562990	19563021	3	10.3	96	57	0.840458	AAG	30.9			.		.		0	plus/minus 1kb	AT2G47750.1	1	1	.
44631	2	19600939	19600961	19593869	19593891	3	7.7	100	46	0.516554	TGA	23.1			AT2G47830.1	1	.		1	exon	AT2G47840.1	1	2		1
44636	2	19606615	19606639	19599545	19599569	4	6.2	95	43	0.0798214	AAAG	24.8			.		.		0	DHS	AT2G47860.1	1	1	DHS
44650	2	19633034	19633070	19625964	19626000	2	18.5	100	74	1.02652	TA	37			AT2G47960.1	1	AT2G47960.1	1	2	intron	AT2G47960.1	1	3	.
44660	2	19673562	19673583	19666492	19666513	2	11	100	44	0.954678	AT	22			AT2G48080.1	1	AT2G48080.1	1	2	intron	AT2G48080.1	1	3	.
44672	2	19696396	19696416	19689326	19689346	2	10.5	100	42	0.908802	TC	21			.		.		0	plus/minus 1kb	AT2G48150.1	1	1	.
44673	2	19697374	19697394	19690304	19690324	2	10.5	100	42	0.908802	AT	21			AT2G48160.1	1	AT2G48160.1	1	2	intron	AT2G48160.1	1	3	.
44726	3	81527	81553	81520	81546	2	13	92	47	0.994741	AT	26			AT3G01260.1	1	AT3G01260.1	1	2	intron	AT3G01260.1	1	3	.
44771	3	190373	190396	190366	190389	3	8	90	41	0.379879	TTC	24			AT3G01480.1	1	AT3G01480.1	1	2	intron	AT3G01480.1	1	3	.
44789	3	205513	205542	205506	205535	3	9.7	92	53	0.705979	TTC	29.1			.		.		0		.			.
44804	3	225995	226016	225988	226009	3	7.3	100	44	0.435838	CTT	21.9			.		.		0	DHS	AT3G01590.2	1	1	DHS
44807	3	229330	229359	229323	229352	2	15	92	46	1.06851	CT	30			.		.		0	plus/minus 1kb	AT3G01590.2	1	1	.
44826	3	285980	286009	285973	286002	3	10.3	92	55	0.785797	AGA	30.9			.		.		0	DHS	AT3G01800.1	1	1	DHS
44831	3	301689	301708	301682	301701	3	6.7	100	40	0.303382	AAC	20.1			AT3G01850.1	1	AT3G01850.1	1	2	intron	AT3G01850.1	1	3	.
44841	3	317177	317201	317170	317194	3	8	91	43	0.399598	AAG	24			AT3G01910.1	1	AT3G01910.1	1	2	intron/DHS	AT3G01910.1	1	3	DHS
44858	3	364285	364314	364278	364307	3	10	100	60	0.870827	GTA	30			AT3G02080.1	1	AT3G02080.1	1	2	intron	AT3G02080.1	1	3	.
44860	3	373735	373765	373728	373758	2	15.5	93	55	1.08081	AG	31			.		.		0	plus/minus 1kb	AT3G02110.1	1	1	.
44892	3	465555	465585	465548	465578	2	15.5	100	62	1.10049	TA	31			AT3G02310.1	1	AT3G02310.1	1	2	intron	AT3G02310.1	1	3	.
44898	3	470071	470093	470064	470086	3	7.7	100	46	0.516554	AAG	23.1			.		.		0	plus/minus 1kb	AT3G02320.1	1	1	.
44903	3	489594	489615	489587	489608	3	7.3	100	44	0.435838	ACA	21.9	HS_343_ACA_unk		.		.		0	DHS	AT3G02380.1	1	1	DHS
44948	3	559826	559847	559819	559840	2	11	100	44	0.954678	TA	22			.		.		0	plus/minus 1kb	AT3G02620.1	1	1	.
44983	3	613896	613921	613889	613914	3	8.7	100	52	0.692832	TTC	26.1			.		.		0	DHS	AT3G02830.1	1	1	DHS
45004	3	640291	640314	640284	640307	2	12	100	48	1.02588	AG	24			.		.		0	DHS	AT3G02890.1	1	1	DHS
45105	3	824161	824189	824154	824182	3	9.7	92	51	0.705979	TGT	29.1			AT3G03460.1	1	.		1	exon	AT3G03470.1	1	2	.
45110	3	827161	827211	827154	827204	3	17	95	95	1.09903	ATT	51			.		.		0	plus/minus 1kb	AT3G03470.1	1	1	.
45122	3	843888	843912	843881	843905	2	12.5	100	50	1.05197	TA	25			AT3G03530.1	1	AT3G03530.1	1	2	intron	AT3G03530.1	1	3	.
45156	3	895952	895977	895945	895970	2	13	91	45	0.982079	TA	26			.		.		0		.			.
45245	3	1063590	1063615	1063583	1063608	2	13	100	52	1.07224	AT	26			.		.		0	DHS	AT3G04070.1	1	1	DHS
45319	3	1181720	1181763	1181714	1181757	2	22	90	53	0.986815	TC	44			.		.		0		.			.
45324	3	1192424	1192448	1192418	1192442	2	12.5	91	43	0.949864	TC	25			.		.		0	DHS	AT3G04470.1	1	1	DHS
45327	3	1197326	1197349	1197320	1197343	2	12	90	41	0.895204	TC	24			.		.		0	DHS	AT3G04480.1	1	1	DHS
45360	3	1247964	1247985	1247958	1247979	3	7.3	100	44	0.435838	ATC	21.9	NC_733_ATC		.		.		0		.			.
45367	3	1256788	1256821	1256782	1256815	3	10.7	90	42	0.801491	CTT	32.1			.		.		0	DHS	AT3G04620.1	1	1	DHS
45388	3	1306592	1306617	1306586	1306611	3	8.7	91	45	0.530293	TCT	26.1			.		.		0	DHS	AT3G04760.1	1	1	DHS
45398	3	1335932	1335956	1335926	1335950	3	8.3	90	43	0.438104	AAG	24.9			.		.		0	DHS	AT3G04850.1	1	1	DHS
45420	3	1364168	1364195	1364162	1364189	3	9.3	100	56	0.78188	TGG	27.9			AT3G04930.1	1	.		1	exon	AT3G04930.1	1	2	.
45421	3	1365249	1365271	1365243	1365265	3	7.7	100	46	0.516554	TCT	23.1			.		.		0	DHS	AT3G04930.1	1	1	DHS
45454	3	1423557	1423583	1423551	1423577	3	9	91	47	0.581349	GAA	27			.		.		0	DHS	AT3G05090.1	1	1	DHS
45473	3	1448797	1448816	1448791	1448810	2	10	100	40	0.855577	CT	20			AT3G05155.1	1	AT3G05155.1	1	2	intron	AT3G05155.1	1	3	.
45503	3	1488489	1488508	1488483	1488502	2	10	100	40	0.855577	CT	20			.		.		0	DHS	AT3G05220.1	1	1	DHS
45513	3	1490968	1490997	1490962	1490991	3	10	92	46	0.747237	CAA	30			AT3G05220.1	1	.		1	exon/DHS	AT3G05220.1	1	2	DHS
45515	3	1492176	1492197	1492170	1492191	3	7.3	100	44	0.435838	TCT	21.9			.		.		0	DHS	AT3G05230.1	1	1	DHS
45525	3	1514904	1514945	1514898	1514939	2	21	100	84	0.930793	GA	42			.		.		0	plus/minus 1kb	AT3G05320.1	1	1	.
45540	3	1553073	1553100	1553067	1553094	2	14	100	56	1.09696	AT	28			AT3G05400.1	1	AT3G05400.1	1	2	intron	AT3G05400.1	1	3	.
45564	3	1604911	1604941	1604905	1604935	2	15.5	100	62	1.10049	TA	31			AT3G05530.1	1	AT3G05530.1	1	2	intron	AT3G05530.1	1	3	.
45577	3	1628401	1628424	1628395	1628418	4	6	100	48	0.140172	TGTT	24			.		.		0	DHS	AT3G05610.1	1	1	DHS
45602	3	1704131	1704160	1704125	1704154	3	10	100	60	0.870827	CTT	30			.		.		0	DHS	AT3G05750.1	1	1	DHS
45622	3	1756150	1756171	1756144	1756165	2	11	100	44	0.954678	AG	22			.		AT3G05880.1	1	1	intron/DHS	AT3G05880.1	1	2	DHS
45639	3	1791904	1791926	1791898	1791920	3	8	90	41	0.379879	ATA	24			.		.		0	DHS	AT3G05975.1	1	1	DHS
45654	3	1814038	1814064	1814032	1814058	3	9	91	47	0.581349	GAA	27			AT3G06020.1	1	.		1	exon	AT3G06020.1	1	2	.
45657	3	1818689	1818771	1818683	1818765	3	27	96	152	0.844194	ATA	81			.		.		0	plus/minus 1kb	AT3G06030.1	1	1	.
45678	3	1855910	1856016	1855904	1856010	3	35.7	98	207	1.26762	TCT	107.1		intergenic	.		.		0	plus/minus 1kb	AT3G06140.1	1	1	.
45781	3	1986507	1986526	1986501	1986520	3	6.7	100	40	0.303382	ACC	20.1			AT3G06480.1	1	.		1	exon	AT3G06480.1	1	2	.
45797	3	2005877	2005901	2005871	2005895	3	8.3	90	43	0.438104	CCA	24.9			AT3G06490.1	1	.		1	exon	AT3G06490.1	1	2	.
45854	3	2102480	2102535	2102474	2102529	3	18.7	100	112	1.04619	CTT	56.1			.		.		0	DHS	AT3G06660.1	1	1	DHS
45871	3	2132851	2132901	2132845	2132895	2	25.5	100	102	0.812059	TC	51			.		.		0	DHS	AT3G06760.1	1	1	DHS
45897	3	2192836	2192872	2192830	2192866	3	12.3	100	74	1.06157	AAG	36.9			.		.		0	DHS	AT3G06950.1	1	1	DHS
45963	3	2304224	2304246	2304218	2304240	3	8	90	41	0.379879	TTC	24			AT3G07250.1	1	.		1	exon	AT3G07250.1	1	2	.
45985	3	2321449	2321468	2321443	2321462	2	10	100	40	0.855577	TC	20			.		.		0	DHS	AT3G07290.1	1	1	DHS
46010	3	2365047	2365071	2365041	2365065	2	12.5	91	43	0.949864	TA	25			.		.		0	DHS	AT3G07390.1	1	1	DHS
46042	3	2420315	2420349	2420309	2420343	2	17.5	100	70	1.05953	TA	35			.		.		0	DHS	AT3G07570.1	1	1	DHS
46044	3	2422703	2422728	2422697	2422722	2	13	100	52	1.07224	CT	26			.		.		0	DHS	AT3G07580.1	1	1	DHS
46060	3	2441700	2441732	2441694	2441726	3	11	100	66	0.971797	AAG	33			.		.		0	plus/minus 1kb	AT3G07650.1	1	1	.
46105	3	2510794	2510831	2510788	2510825	3	12	91	55	0.944139	TCT	36			.		.		0	DHS	AT3G07870.1	1	1	DHS
46108	3	2514221	2514245	2514215	2514239	3	8.3	90	43	0.438104	ACA	24.9			AT3G07880.1	1	.		1	exon	AT3G07880.1	1	2	.
46118	3	2538273	2538292	2538267	2538286	3	6.7	100	40	0.303382	TTG	20.1			.		.		0	plus/minus 1kb	AT3G07960.1	1	1	.
46146	3	2583887	2583914	2583881	2583908	3	9.3	92	49	0.646654	TCA	27.9			AT3G08510.1	1	.		1	exon	AT3G08510.1	1	2	.
46151	3	2596453	2596476	2596447	2596470	3	8	90	41	0.379879	TTC	24			.		.		0	plus/minus 1kb	AT3G08550.1	1	1	.
46163	3	2612441	2612471	2612435	2612465	3	10	96	55	0.804008	CTC	30			.		.		0	plus/minus 1kb	AT3G08600.1	1	1	.
46206	3	2670650	2670669	2670644	2670663	3	6.7	100	40	0.303382	CAA	20.1			AT3G08790.1	1	.		1	exon	AT3G08800.1	1	2	.
46211	3	2681350	2681373	2681344	2681367	3	7.7	90	41	0.31861	AAC	23.1			AT3G08840.2	1	AT3G08840.2	1	2	intron	AT3G08840.2	1	3	.
46233	3	2769153	2769172	2769148	2769167	3	6.7	100	40	0.303382	CCT	20.1			AT3G09070.1	1	.		1	exon	AT3G09070.1	1	2	.
46340	3	2994837	2994861	2994832	2994856	3	8.3	90	43	0.438104	GAA	24.9			AT3G09760.1	1	.		1	exon	AT3G09760.1	1	2	.
46357	3	3024930	3024953	3024925	3024948	3	7.7	90	41	0.31861	TCA	23.1			AT3G09850.1	1	.		1	exon	AT3G09850.1	1	2	.
46402	3	3098809	3098883	3098804	3098878	2	37.5	93	129	1.18402	TC	75			.		.		0	plus/minus 1kb	AT3G10050.1	1	1	.
46501	3	3260059	3260082	3260054	3260077	2	12.5	91	43	0.949864	TC	25			.		.		0	DHS	AT3G10470.1	1	1	DHS
46518	3	3289629	3289649	3289624	3289644	3	7	100	42	0.37134	ATT	21			.		.		0	DHS	AT3G10530.1	1	1	DHS
46535	3	3321045	3321068	3321040	3321063	3	8	90	41	0.379879	CTT	24			AT3G10620.1	1	AT3G10620.1	1	2	intron	AT3G10620.1	1	3	.
46549	3	3356572	3356594	3356567	3356589	2	11.5	100	46	0.993576	AT	23			AT3G10720.2	1	AT3G10720.2	1	2	intron	AT3G10720.1	1	3	.
46580	3	3393718	3393744	3393713	3393739	2	14	92	49	1.04094	AC	28			.		.		0	DHS	AT3G10845.1	1	1	DHS
46585	3	3405318	3405340	3405313	3405335	2	11.5	100	46	0.993576	TA	23			.		.		0	DHS	AT3G10880.1	1	1	DHS
46606	3	3447592	3447614	3447586	3447608	2	11.5	100	46	0.993576	CT	23			.		.		0	plus/minus 1kb	AT3G10990.1	1	1	.
46656	3	3508360	3508381	3508354	3508375	3	7.3	100	44	0.435838	ATC	21.9			.		.		0	plus/minus 1kb	AT3G11200.1	1	1	.
46708	3	3578461	3578485	3578455	3578479	3	8.3	90	43	0.438104	CTT	24.9			.		.		0	DHS	AT3G11397.1	1	1	DHS
46800	3	3706492	3706528	3706486	3706522	3	12.3	94	67	0.999768	AGA	36.9			AT3G11720.1	1	.		1	exon	AT3G11720.1	1	2	.
46815	3	3728869	3728913	3728863	3728907	3	15.3	90	78	1.08708	TGA	45.9			AT3G11810.1	1	.		1	exon	AT3G11810.1	1	2	.
46884	3	3852502	3852522	3852496	3852516	2	10.5	100	42	0.908802	AG	21			AT3G12090.1	1	AT3G12090.1	1	2	intron	AT3G12090.1	1	3	.
46915	3	3910762	3910785	3910755	3910778	3	8.3	90	43	0.438104	AGG	24.9			AT3G12270.1	1	.		1	exon	AT3G12270.1	1	2	.
46941	3	3963347	3963380	3963340	3963373	2	16.5	93	61	1.08306	AT	33			AT3G12500.1	1	AT3G12500.1	1	2	intron	AT3G12500.1	1	3	.
47018	3	4105312	4105332	4105305	4105325	2	10.5	100	42	0.908802	TA	21			AT3G12900.1	1	AT3G12900.1	1	2	intron	AT3G12900.1	1	3	.
47029	3	4136091	4136126	4136084	4136119	2	18	94	65	1.06283	CT	36			.		.		0	plus/minus 1kb	AT3G12955.1	1	1	.
47059	3	4215957	4215988	4215950	4215981	3	10.7	93	57	0.846978	AGG	32.1			AT3G13110.1	1	.		1	exon	AT3G13110.1	1	2	.
47105	3	4295623	4295660	4295616	4295653	2	19.5	94	71	1.02508	TA	39			AT3G13280.1	1	AT3G13280.1	1	2	intron	AT3G13280.1	1	3	.
47205	3	4498050	4498072	4498043	4498065	2	11.5	100	46	0.993576	AT	23			.		.		0	DHS	AT3G13730.1	1	1	DHS
47236	3	4553952	4553974	4553945	4553967	3	7.7	100	46	0.516554	GAC	23.1			AT3G13830.1	1	.		1	exon	AT3G13830.1	1	2	.
47261	3	4608315	4608361	4608308	4608354	2	23.5	95	87	0.893802	AG	47			.		.		0	plus/minus 1kb	AT3G13960.1	1	1	.
47276	3	4615601	4615620	4615594	4615613	2	10	100	40	0.855577	TA	20			.		.		0	DHS	AT3G13970.1	1	1	DHS
47544	3	4987607	4987638	4987600	4987631	2	16	100	64	1.09435	AT	32			.		.		0	DHS	AT3G14840.1	1	1	DHS
47550	3	4995673	4995694	4995666	4995687	3	7.3	100	44	0.435838	CTT	21.9			AT3G14850.2	1	.		1	exon	AT3G14850.2	1	2	.
47571	3	5050736	5050759	5050729	5050752	2	12	100	48	1.02588	CT	24			AT3G15000.1	1	AT3G15000.1	1	2	intron	AT3G15000.1	1	3	.
47587	3	5081946	5081981	5081939	5081974	3	12	93	65	0.968154	TCT	36			.		.		0	DHS	AT3G15095.1	1	1	DHS
47589	3	5083126	5083168	5083119	5083161	6	7.2	91	65	0.324865	CAGAAG	43.2			AT3G15095.1	1	.		1	exon	AT3G15095.1	1	2	.
47591	3	5086736	5086756	5086729	5086749	3	7	100	42	0.37134	AGA	21			AT3G15115.1	1	.		1	exon	AT3G15110.1	1	2	.
47648	3	5192414	5192447	5192407	5192440	3	11.7	93	63	0.944133	ATA	35.1			.		.		0	plus/minus 1kb	AT3G15370.1	1	1	.
47664	3	5220183	5220202	5220176	5220195	2	10	100	40	0.855577	GA	20			.		.		0	DHS	AT3G15470.1	1	1	DHS
47828	3	5454417	5454436	5454411	5454430	3	6.7	100	40	0.303382	ATA	20.1			.		.		0	DHS	AT3G16080.1	1	1	DHS
47847	3	5513047	5513069	5513041	5513063	3	7.7	100	46	0.516554	GAA	23.1	CD_123_GAA_trz4		AT3G16260.1	1	.		1	exon	AT3G16270.1	1	2	.
47872	3	5570140	5570182	5570134	5570176	2	22	95	81	0.937937	AT	44			.		.		0		.			.
47875	3	5572989	5573012	5572983	5573006	2	12	90	41	0.895204	AT	24			AT3G16410.1	1	AT3G16410.1	1	2	intron	AT3G16410.1	1	3	.
47883	3	5587555	5587574	5587549	5587568	2	10	100	40	0.855577	AT	20			.		.		0	plus/minus 1kb	AT3G16440.1	1	1	.
47902	3	5600213	5600233	5600207	5600227	2	10.5	100	42	0.908802	TG	21			AT3G16480.1	1	AT3G16480.1	1	2	intron	AT3G16480.1	1	3	.
47995	3	5756375	5756405	5756369	5756399	2	15.5	93	55	1.08081	GA	31			AT3G16857.1	1	AT3G16857.1	1	2	intron	AT3G16857.1	1	3	.
48004	3	5778778	5778800	5778772	5778794	2	11.5	100	46	0.993576	TA	23			.		.		0	DHS	AT3G16930.1	1	1	DHS
48025	3	5803852	5803873	5803846	5803867	2	11	100	44	0.954678	GA	22			AT3G17020.1	1	AT3G17020.1	1	2	intron	AT3G17020.1	1	3	.
48044	3	5820025	5820046	5820019	5820040	2	11	100	44	0.954678	AT	22			.		.		0		.			.
48087	3	5852382	5852418	5852376	5852412	3	12.3	91	60	0.967168	ATG	36.9			AT3G17160.1	1	.		1	exon	AT3G17170.1	1	2	.
48115	3	5876195	5876220	5876189	5876214	2	13	91	45	0.982079	AT	26			AT3G17205.1	1	AT3G17205.1	1	2	intron	AT3G17205.1	1	3	.
48125	3	5900165	5900184	5900159	5900178	3	6.7	100	40	0.303382	TTG	20.1			AT3G17265.1	1	AT3G17265.1	1	2	intron	AT3G17265.1	1	3	.
48177	3	5992792	5992814	5992786	5992808	2	11.5	100	46	0.993576	AT	23			.		.		0	DHS	AT3G17510.1	1	1	DHS
48178	3	5992844	5992866	5992838	5992860	3	8	90	41	0.379879	GAA	24			.		.		0	DHS	AT3G17510.1	1	1	DHS
48214	3	6055384	6055413	6055378	6055407	3	10	92	46	0.747237	CTT	30			.		.		0	DHS	AT3G17710.1	1	1	DHS
48247	3	6124019	6124038	6124013	6124032	3	6.7	100	40	0.303382	ATG	20.1			AT3G17880.1	1	.		1	exon	AT3G17880.1	1	2	.
48253	3	6148486	6148508	6148480	6148502	2	11.5	100	46	0.993576	TG	23			AT3G17970.1	1	AT3G17970.1	1	2	intron	AT3G17970.1	1	3	.
48295	3	6220330	6220356	6220324	6220350	2	13.5	92	47	1.02035	AT	27			.		.		0	DHS	AT3G18160.2	1	1	DHS
48310	3	6260714	6260733	6260708	6260727	2	10	100	40	0.855577	TA	20			AT3G18260.1	1	AT3G18260.1	1	2	intron	AT3G18260.1	1	3	.
48375	3	6375812	6375914	6375806	6375908	6	17.2	96	185	1.12634	GGGATG	103.2	CD_133_GGGATG_unk		AT3G18535.1	1	.		1	exon	AT3G18540.1	1	2	.
48412	3	6413038	6413060	6413032	6413054	3	7.7	100	46	0.516554	GAA	23.1			.		.		0	plus/minus 1kb	AT3G18640.1	1	1	.
48418	3	6427359	6427389	6427353	6427383	2	15.5	100	62	1.10049	AT	31			.		.		0	DHS	AT3G18670.1	1	1	DHS
48568	3	6640112	6640131	6640106	6640125	3	6.7	100	40	0.303382	TTC	20.1			AT3G19190.1	1	AT3G19190.1	1	2	intron	AT3G19190.1	1	3	.
48573	3	6651232	6651255	6651226	6651249	2	12	100	48	1.02588	CT	24			.		.		0		.			.
48590	3	6674316	6674357	6674310	6674351	2	21	100	84	0.930793	TA	42			AT3G19270.1	1	AT3G19270.1	1	2	intron	AT3G19270.1	1	3	.
48654	3	6750011	6750045	6750005	6750039	3	11.7	100	70	1.0256	ATC	35.1			AT3G19470.1	1	.		1	exon	AT3G19470.1	1	2	.
48673	3	6774774	6774796	6774768	6774790	2	11.5	100	46	0.993576	TA	23			.		AT3G19520.2	1	1	intron	AT3G19520.1	1	2	.
48779	3	6980315	6980334	6980309	6980328	2	10	100	40	0.855577	GA	20			.		.		0	DHS	AT3G20015.1	1	1	DHS
48813	3	7065494	7065517	7065488	7065511	3	8	90	41	0.379879	TTC	24			AT3G20260.1	1	.		1	exon	AT3G20260.1	1	2	.
48964	3	7292991	7293059	7292985	7293053	6	11.5	95	110	1.00136	AAAAAC	69	NC_743_AAAAAC		.		.		0	DHS/non gene	.			DHS
48969	3	7300503	7300543	7300497	7300537	6	6.8	94	68	0.260783	AGAGAA	40.8			.		.		0	plus/minus 1kb	AT3G20840.1	1	1	.
48996	3	7325483	7325503	7325477	7325497	2	10.5	100	42	0.908802	TC	21			.		.		0	DHS	AT3G20910.1	1	1	DHS
49050	3	7447611	7447638	7447605	7447632	2	14	100	56	1.09696	TC	28			.		.		0	plus/minus 1kb	AT3G21230.1	1	1	.
49057	3	7464989	7465009	7464983	7465003	2	10.5	100	42	0.908802	GA	21			AT3G21260.2	1	AT3G21260.2	1	2	intron/DHS	AT3G21260.1	1	3	DHS
49114	3	7542945	7542971	7542939	7542965	2	13.5	100	54	1.08711	TA	27			AT3G21420.1	1	AT3G21420.1	1	2	intron	AT3G21420.1	1	3	.
49123	3	7567615	7567644	7567609	7567638	3	10	100	60	0.870827	TTC	30			.		.		0	DHS	AT3G21480.1	1	1	DHS
49152	3	7644810	7644831	7644803	7644824	3	7.3	100	44	0.435838	GGT	21.9			AT3G21700.3	1	.		1	exon	AT3G21700.3	1	2	.
49157	3	7649445	7649467	7649438	7649460	3	7.7	100	46	0.516554	AAC	23.1			AT3G21710.2	1	.		1	exon	AT3G21710.1	1	2	.
49253	3	7778641	7778675	7778634	7778668	2	17.5	100	70	1.05953	AT	35			AT3G22080.1	1	AT3G22080.1	1	2	intron	AT3G22080.1	1	3	.
49282	3	7791948	7791981	7791941	7791974	3	11.3	100	68	0.996479	AAC	33.9			AT3G22104.1	1	.		1	exon	AT3G22104.1	1	2	.
49346	3	7839661	7839691	7839654	7839684	3	10.3	92	55	0.785797	AAG	30.9			.		.		0	DHS	AT3G22200.1	1	1	DHS
49350	3	7846247	7846267	7846240	7846260	2	10.5	100	42	0.908802	AT	21			AT3G22231.1	1	AT3G22231.1	1	2	intron	AT3G22231.1	1	3	.
49361	3	7854553	7854573	7854546	7854566	2	10.5	100	42	0.908802	AT	21			AT3G22235.1	1	.		1	exon	AT3G22235.1	1	2	.
49468	3	7953597	7953616	7953590	7953609	3	6.7	100	40	0.303382	AAC	20.1			AT3G22430.1	1	.		1	exon	AT3G22430.1	1	2	.
49484	3	7971865	7971889	7971858	7971882	4	6.5	95	45	0.156877	AACA	26			.		.		0	plus/minus 1kb	AT3G22500.1	1	1	.
49551	3	8048581	8048606	8048574	8048599	3	8.7	100	52	0.692832	ATG	26.1			AT3G22770.1	1	.		1	exon/DHS	AT3G22780.1	1	2	DHS
49561	3	8063272	8063349	8063265	8063342	6	13	94	128	1.09069	GGTGGA	78			AT3G22800.1	1	.		1	exon	AT3G22800.1	1	2
49612	3	8125761	8125830	8125754	8125823	3	23.3	97	133	0.897878	GTT	69.9	CD_143_GTT_cml11		AT3G22930.1	1	.		1	exon	AT3G22930.1	1	2	.
49619	3	8138407	8138456	8138400	8138449	2	25.5	95	95	0.85203	AT	51			.		.		0	plus/minus 1kb	AT3G22950.1	1	1	.
49662	3	8195260	8195299	8195253	8195292	2	20	100	80	0.969646	TA	40			AT3G23050.2	1	AT3G23050.2	1	2	intron	AT3G23050.2	1	3	.
49737	3	8260680	8260708	8260673	8260701	3	9.7	92	51	0.705979	CAT	29.1			AT3G23160.1	1	.		1	exon	AT3G23160.1	1	2	.
49738	3	8261898	8261920	8261891	8261913	3	7.7	100	46	0.516554	GAA	23.1			.		.		0	DHS	AT3G23160.1	1	1	DHS
49776	3	8312434	8312462	8312427	8312455	3	9.7	100	58	0.834623	ATG	29.1			AT3G23255.1	1	AT3G23255.1	1	2	intron	AT3G23260.1	1	3	.
49780	3	8320222	8320244	8320215	8320237	3	7.7	100	46	0.516554	TCA	23.1			AT3G23270.1	1	.		1	exon	AT3G23270.1	1	2	.
49798	3	8338980	8339020	8338973	8339013	5	8.2	91	68	0.502321	GTTGT	41			.		.		0	DHS	AT3G23310.1	1	1	DHS
49828	3	8378277	8378297	8378270	8378290	3	7	100	42	0.37134	AGA	21	HS_353_AGA_fib4		.		.		0	DHS	AT3G23400.1	1	1	DHS
49848	3	8404295	8404349	8404288	8404342	3	18.3	96	103	1.06825	ATG	54.9			.		.		0	DHS	AT3G23440.1	1	1	DHS
49881	3	8414105	8414155	8414098	8414148	2	25.5	100	102	0.812059	AC	51			AT3G23460.1	1	AT3G23460.1	1	2	intron/DHS	AT3G23460.1	1	3	DHS
49888	3	8423495	8423517	8423488	8423510	2	11.5	100	46	0.993576	AC	23			AT3G23490.1	1	AT3G23490.1	1	2	intron	AT3G23490.1	1	3	.
49890	3	8424651	8424681	8424644	8424674	4	7.8	92	55	0.407798	CAGA	31.2			.		.		0	DHS	AT3G23490.1	1	1	DHS
49976	3	8554754	8554777	8554747	8554770	2	12	100	48	1.02588	AG	24			.		.		0	DHS	AT3G23740.1	1	1	DHS
49999	3	8581853	8581872	8581846	8581865	2	10	100	40	0.855577	TA	20			AT3G23800.1	1	AT3G23800.1	1	2	intron	AT3G23800.1	1	3	.
50053	3	8624769	8624819	8624762	8624812	3	17	100	102	1.0988	TCT	51			.		.		0	plus/minus 1kb	AT3G23890.1	1	1	.
50058	3	8635630	8635649	8635623	8635642	3	6.7	100	40	0.303382	TCA	20.1			AT3G23900.1	1	.		1	exon	AT3G23910.1	1	2	.
50059	3	8636038	8636063	8636031	8636056	3	8.7	100	52	0.692832	AAG	26.1			.		.		0	DHS	AT3G23910.1	1	1	DHS
50060	3	8638391	8638414	8638384	8638407	2	12	100	48	1.02588	CA	24			AT3G23910.1	1	AT3G23910.1	1	2	intron	AT3G23910.1	1	3	.
50081	3	8667363	8667386	8667356	8667379	3	8	90	41	0.379879	GAT	24			AT3G23980.1	1	AT3G23980.1	1	2	intron	AT3G23980.1	1	3	.
50098	3	8695285	8695344	8695278	8695337	6	10	100	120	0.911753	AGCCTC	60	IN_473_AGCCTC_krr1		AT3G24080.1	1	AT3G24080.2	1	2	intron	AT3G24070.1	1	3	.
50113	3	8715630	8715650	8715623	8715643	2	10.5	100	42	0.908802	AT	21			AT3G24140.1	1	AT3G24140.1	1	2	intron	AT3G24140.1	1	3	.
50290	3	8941480	8941500	8941473	8941493	3	7	100	42	0.37134	AAC	21			AT3G24520.1	1	AT3G24518.1	1	2	intron/DHS	AT3G24520.1	1	3	DHS
50297	3	8952171	8952194	8952164	8952187	3	8.3	90	43	0.438104	CAT	24.9			AT3G24535.1	1	.		1	exon	AT3G24540.1	1	2	.
50332	3	8998847	8998866	8998840	8998859	3	6.7	100	40	0.303382	CAC	20.1			AT3G24650.1	1	.		1	exon	AT3G24650.1	1	2	.
50333	3	8999346	8999371	8999339	8999364	3	8.7	100	52	0.692832	AAC	26.1			AT3G24650.1	1	.		1	exon	AT3G24650.1	1	2	.
50391	3	9055585	9055649	9055578	9055642	2	32.5	100	130	1.03023	TC	65			.		.		0	plus/minus 1kb	AT3G24800.1	1	1	.
50551	3	9282391	9282410	9281154	9281173	3	6.7	100	40	0.303382	AAC	20.1			AT3G25560.1	1	AT3G25560.1	1	2	intron	AT3G25560.1	1	3	.
50566	3	9296642	9296670	9295405	9295433	2	15	92	53	1.06851	CT	30			.		.		0	DHS	AT3G25585.2	1	1	DHS
50630	3	9358944	9358968	9357707	9357731	3	8.3	100	50	0.6266	AAT	24.9			AT3G25690.1	1	.		1	exon	AT3G25690.1	1	2	.
50677	3	9392409	9392436	9391172	9391199	3	9.3	100	56	0.78188	CAT	27.9	NC_753_CAT		.		.		0		.			.
50715	3	9442078	9442097	9440841	9440860	2	10	100	40	0.855577	AT	20			AT3G25820.1	1	AT3G25820.1	1	2	intron	AT3G25820.1	1	3	.
50719	3	9450341	9450360	9449104	9449123	2	10	100	40	0.855577	AT	20			AT3G25830.1	1	AT3G25830.1	1	2	intron	AT3G25830.1	1	3	.
50744	3	9476750	9476777	9475513	9475540	3	9.3	92	49	0.646654	TCT	27.9			.		.		0	DHS	AT3G25890.1	1	1	DHS
50752	3	9481238	9481266	9480001	9480029	2	14.5	92	51	1.05688	AT	29			.		.		0	DHS	AT3G25900.2	1	1	DHS
50761	3	9491489	9491544	9490252	9490307	3	18.7	92	84	1.07217	AGA	56.1			AT3G25910.1	1	.		1	exon	AT3G25920.1	1	2		1
50787	3	9515831	9515854	9514594	9514617	3	8	100	48	0.573207	AAC	24			AT3G26020.1	1	.		1	exon	AT3G26020.1	1	2	.
50790	3	9518590	9518617	9517353	9517380	3	9.3	100	56	0.78188	CTT	27.9			.		.		0	DHS	AT3G26020.1	1	1	DHS
50810	3	9539583	9539609	9538346	9538372	3	8.7	95	47	0.596826	TTG	26.1			AT3G26100.2	1	AT3G26100.2	1	2	intron	AT3G26100.2	1	3	.
50858	3	9586329	9586358	9585092	9585121	3	10	92	46	0.747237	TTC	30			.		.		0	plus/minus 1kb	AT3G26190.1	1	1	.
50942	3	9668250	9668271	9667013	9667034	3	7.3	100	44	0.435838	GTG	21.9			AT3G26400.1	1	.		1	exon	AT3G26400.1	1	2	.
51021	3	9757626	9757648	9756389	9756411	3	8	90	41	0.379879	TTC	24			AT3G26570.1	1	AT3G26570.1	1	2	intron	AT3G26570.1	1	3	.
51026	3	9764527	9764563	9763290	9763326	2	18.5	94	67	1.05165	TA	37			AT3G26590.1	1	AT3G26590.1	1	2	intron	AT3G26590.1	1	3	.
51032	3	9770262	9770281	9769025	9769044	2	10	100	40	0.855577	AT	20			.		.		0	DHS	AT3G26600.1	1	1	DHS
51042	3	9780399	9780432	9779162	9779195	2	17	100	68	1.07348	TA	34			AT3G26610.1	1	AT3G26610.1	1	2	intron	AT3G26610.1	1	3	.
51238	3	10018731	10018753	10017494	10017516	3	8	90	41	0.379879	TTC	24			.		.		0	DHS	AT3G27160.1	1	1	DHS
51272	3	10040243	10040279	10039006	10039042	2	19	94	69	1.03897	AT	38			.		.		0	plus/minus 1kb	AT3G27190.1	1	1	.
51315	3	10082142	10082174	10080905	10080937	3	11	93	59	0.878982	CAT	33			AT3G27290.1	1	.		1	exon	AT3G27290.1	1	2	.
51316	3	10082582	10082607	10081345	10081370	4	6.5	100	52	0.266031	GAAT	26			.		.		0	plus/minus 1kb	AT3G27290.1	1	1	.
51369	3	10128074	10128095	10126837	10126858	3	7.3	100	44	0.435838	CCT	21.9			AT3G27350.1	1	.		1	exon	AT3G27350.1	1	2	.
51370	3	10129306	10129331	10128069	10128094	3	8.7	100	52	0.692832	TCT	26.1			.		.		0	DHS	AT3G27350.1	1	1	DHS
51373	3	10137710	10137730	10136473	10136493	3	7	100	42	0.37134	GAA	21			.		.		0	DHS	AT3G27390.1	1	1	DHS
51405	3	10174596	10174615	10173359	10173378	3	6.7	100	40	0.303382	ACA	20.1			.		.		0	plus/minus 1kb	AT3G27480.1	1	1	.
51432	3	10221058	10221082	10219821	10219845	3	8	95	43	0.469246	AGA	24			.		.		0	DHS	AT3G27580.1	1	1	DHS
52386	3	10879299	10879339	10878062	10878102	4	10.2	91	68	0.788307	ATAT	40.8			.		.		0	plus/minus 1kb	AT3G28860.1	1	1	.
52442	3	10925947	10925968	10924710	10924731	2	11	100	44	0.954678	AT	22			.		.		0	DHS	AT3G28917.1	1	1	DHS
52594	3	11007220	11007267	11005983	11006030	3	16	100	96	1.11862	GAT	48	CD_153_GAT*_unk		AT3G29000.1	1	.		1	exon/DHS	AT3G29000.1	1	2	DHS
52595	3	11008682	11008703	11007445	11007466	2	11	100	44	0.954678	GT	22			AT3G29010.1	1	AT3G29010.1	1	2	intron	AT3G29010.1	1	3	.
52602	3	11015197	11015222	11013960	11013985	3	8.7	91	45	0.530293	ATT	26.1			.		.		0	plus/minus 1kb	AT3G29030.1	1	1	.
52650	3	11049553	11049577	11048316	11048340	3	8.3	100	50	0.6266	AGG	24.9			AT3G29060.1	1	.		1	exon	AT3G29060.1	1	2	.
52814	3	11150000	11150028	11148763	11148791	3	9.7	100	58	0.834623	TTG	29.1			.		AT3G29180.1	1	1	intron/DHS	AT3G29180.1	1	2	DHS
52829	3	11161673	11161722	11160436	11160485	2	25	95	93	0.86013	AT	50			AT3G29190.1	1	AT3G29190.1	1	2	intron	AT3G29190.1	1	3	.
52833	3	11165938	11165958	11164701	11164721	3	7	100	42	0.37134	CTT	21			AT3G29200.1	1	.		1	exon	AT3G29200.1	1	2	.
52842	3	11176093	11176152	11174856	11174915	3	20	100	120	0.997593	TCA	60	NC_763_TCA		.		.		0		.			.
52977	3	11265677	11265696	11264440	11264459	3	6.7	100	40	0.303382	AAC	20.1			AT3G29350.1	1	AT3G29350.1	1	2	intron	AT3G29350.1	1	3	.
52995	3	11279854	11279873	11278617	11278636	2	10	100	40	0.855577	TC	20			.		.		0	DHS	AT3G29370.1	1	1	DHS
53030	3	11306460	11306483	11305223	11305246	3	8	100	48	0.573207	ATT	24			.		.		0	plus/minus 1kb	AT3G29410.1	1	1	.
53031	3	11306584	11306616	11305347	11305379	2	16.5	93	59	1.08306	TA	33			.		.		0	plus/minus 1kb	AT3G29410.1	1	1	.
53422	3	11488594	11488762	11486115	11486283	2	84	90	286	2.1294	TC	168			.		.		0		.			.
53960	3	11837073	11837111	11834594	11834632	2	20	94	73	1.01031	AT	40			.		.		0	plus/minus 1kb	AT3G30200.1	1	1	.
54070	3	11910891	11910963	11908412	11908484	2	37	95	134	1.22849	AT	74			.		.		0	plus/minus 1kb	AT3G30260.1	1	1	.
54101	3	11939581	11939634	11937102	11937155	2	27.5	96	103	0.832084	AG	55			.		.		0		.			.
54461	3	12132928	12132957	12130449	12130478	2	15.5	93	55	1.08081	TA	31			AT3G30520.1	1	AT3G30520.1	1	2	intron	AT3G30520.1	1	3	.
54519	3	12170657	12170731	12168178	12168252	2	37.5	97	143	1.35885	GA	75			.		.		0	plus/minus 1kb	AT3G30580.1	1	1	.
54974	3	12478308	12478331	12475829	12475852	3	8.3	90	43	0.438104	TTA	24.9			.		.		0		.			.
55603	3	12969484	12969520	12967005	12967041	6	6.2	90	60	0.0731008	ACCACG	37.2			.		.		0		.			.
55694	3	13070300	13070334	13066587	13066621	2	18	94	65	1.06283	CT	36			.		.		0		.			.
55730	3	13094249	13094269	13090536	13090556	3	7	100	42	0.37134	AAG	21	NC_773_AAG		.		.		0		.			.
56123	3	13406765	13406820	13403052	13403107	3	18.7	100	112	1.04619	AAG	56.1	NC_783_AAG		.		.		0		.			.
56739	3	14052706	14052784	14041720	14041798	6	13.2	94	144	1.09946	ACCACG	79.2			.		.		0		.			.
56991	3	14215691	14215763	14204705	14204777	6	12.8	94	72	1.08101	GAAAAA	76.8			.		.		0		.			.
57024	3	14265380	14265470	14254394	14254484	2	45.5	100	182	2.48776	AG	91			.		.		0	plus/minus 1kb	AT3G42060.1	1	1	.
57069	3	14313299	14313324	14302313	14302338	3	8.7	91	45	0.530293	TCA	26.1			AT3G42140.1	1	.		1	exon	AT3G42140.1	1	2	.
57260	3	14470833	14470877	14459847	14459891	3	15	95	83	1.1058	GGA	45			AT3G42310.1	1	.		1	exon	AT3G42310.1	1	2	.
57572	3	14769568	14769587	14758582	14758601	3	6.7	100	40	0.303382	TCT	20.1			AT3G42670.1	1	.		1	exon	AT3G42670.1	1	2	.
57579	3	14773195	14773265	14762209	14762279	2	35	97	135	1.14862	TC	70			.		.		0		.			.
57632	3	14818097	14818121	14807111	14807135	3	8.3	100	50	0.6266	TCT	24.9	NC_793_TCT		.		.		0		.			.
58050	3	15165146	15165166	15154158	15154178	3	7	100	42	0.37134	CAG	21			.		.		0		.			.
58112	3	15218822	15218857	15207834	15207869	3	12	93	65	0.968154	ATG	36			AT3G43230.1	1	.		1	exon	AT3G43230.1	1	2	.
58122	3	15228326	15228348	15217338	15217360	3	7.7	100	46	0.516554	AGA	23.1			AT3G43250.1	1	.		1	exon	AT3G43250.1	1	2	.
58128	3	15233255	15233275	15222267	15222287	3	7	100	42	0.37134	AAT	21			.		.		0	plus/minus 1kb	AT3G43260.1	1	1	.
58132	3	15235112	15235138	15224124	15224150	2	13.5	100	54	1.08711	TA	27			AT3G43270.1	1	AT3G43270.1	1	2	intron	AT3G43270.1	1	3	.
58167	3	15281446	15281474	15270458	15270486	3	10	92	53	0.747237	AAG	30			.		.		0		.			.
58463	3	15522824	15522843	15511836	15511855	3	6.7	100	40	0.303382	AAG	20.1			AT3G43590.1	1	.		1	exon	AT3G43590.1	1	2	.
58651	3	15677234	15677263	15666247	15666276	3	10	100	60	0.870827	AGA	30	IN_483_AGA_cam7		AT3G43810.1	1	AT3G43810.1	1	2	intron	AT3G43810.1	1	3	.
58749	3	15744076	15744175	15733089	15733188	2	50	100	200	2.949	TC	100			.		.		0		.			.
58757	3	15747989	15748013	15737002	15737026	3	8	95	43	0.469246	AAT	24			.		.		0		.			.
58777	3	15755843	15755870	15744856	15744883	2	14	100	56	1.09696	AT	28			.		.		0		.			.
58794	3	15774119	15774138	15763132	15763151	3	6.7	100	40	0.303382	GGT	20.1			AT3G43930.1	1	.		1	exon	AT3G43930.1	1	2	.
59145	3	16039048	16039077	16028061	16028090	3	9.7	96	53	0.764781	AAT	29.1	NC_803_AAT		.		.		0	DHS/non gene	.			DHS
59177	3	16056610	16056638	16045623	16045651	3	9.7	92	51	0.705979	AAC	29.1			.		AT3G44400.2	1	1	intron	AT3G44400.1	1	2	.
59631	3	16369409	16369483	16358422	16358496	3	25	94	122	0.87803	GAT	75			.		.		0	plus/minus 1kb	AT3G44810.1	1	1	.
59634	3	16375572	16375594	16364587	16364609	3	7.7	100	46	0.516554	AAG	23.1			.		.		0	DHS	AT3G44820.1	1	1	DHS
59635	3	16380804	16380833	16369819	16369848	2	15	100	60	1.10325	AT	30			AT3G44830.1	1	AT3G44830.1	1	2	intron	AT3G44830.1	1	3	.
59643	3	16394750	16394774	16383765	16383789	3	8	91	43	0.399598	TCT	24			.		.		0	DHS	AT3G44880.1	1	1	DHS
59747	3	16480186	16480209	16469201	16469224	3	8	90	41	0.379879	TCA	24			AT3G45020.1	1	.		1	exon	AT3G45020.1	1	2	.
59843	3	16559162	16559187	16548177	16548202	3	8.7	100	52	0.692832	GAA	26.1			.		.		0	plus/minus 1kb	AT3G45190.1	1	1	.
59950	3	16635698	16635720	16624713	16624735	2	12	90	41	0.895204	GA	24			AT3G45300.1	1	AT3G45300.1	1	2	intron	AT3G45300.1	1	3	.
60172	3	16833506	16833539	16822521	16822554	2	17	100	68	1.07348	AT	34			AT3G45780.1	1	AT3G45780.1	1	2	intron	AT3G45780.1	1	3	.
60243	3	16908755	16908779	16897770	16897794	3	8.3	90	43	0.438104	TCT	24.9			AT3G45980.1	1	.		1	exon	AT3G45970.1	1	2	.
60270	3	16924877	16924901	16913892	16913916	3	8.3	90	43	0.438104	TCT	24.9			AT3G46030.1	1	.		1	exon	AT3G46040.1	1	2	.
60303	3	16948319	16948345	16937334	16937360	2	13.5	100	54	1.08711	TA	27			AT3G46120.1	1	AT3G46120.1	1	2	intron	AT3G46120.1	1	3	.
60309	3	16950214	16950242	16939229	16939257	2	15	92	53	1.06851	AT	30			AT3G46120.1	1	AT3G46120.1	1	2	intron	AT3G46120.1	1	3	.
60374	3	17031717	17031740	17020732	17020755	2	12	100	48	1.02588	AT	24			.		.		0	plus/minus 1kb	AT3G46320.1	1	1	.
60513	3	17134492	17134516	17123507	17123531	2	12.5	91	43	0.949864	TC	25			.		.		0	plus/minus 1kb	AT3G46500.1	1	1	.
60565	3	17190936	17190963	17179951	17179978	3	9.3	92	42	0.646654	GTT	27.9			AT3G46620.1	1	.		1	exon/DHS	AT3G46620.1	1	2	DHS
60596	3	17231402	17231431	17220417	17220446	3	10	92	46	0.747237	AGA	30			AT3G46750.1	1	.		1	exon/DHS	AT3G46750.1	1	2	DHS
60604	3	17255284	17255325	17244299	17244340	2	21	100	84	0.930793	AT	42			.		.		0	DHS	AT3G46820.1	1	1	DHS
60664	3	17351370	17351390	17340385	17340405	3	7	100	42	0.37134	AGA	21			.		.		0	DHS	AT3G47080.1	1	1	DHS
60719	3	17400594	17400622	17389609	17389637	2	14.5	92	51	1.05688	TC	29			AT3G47220.1	1	AT3G47220.1	1	2	intron	AT3G47220.1	1	3	.
60847	3	17438848	17438893	17427863	17427908	3	13.7	95	57	1.07742	AAC	41.1			.		.		0	DHS	AT3G47295.1	1	1	DHS
60862	3	17447281	17447304	17436296	17436319	3	8	100	48	0.573207	ATC	24			.		.		0		.			.
60892	3	17508329	17508377	17497344	17497392	2	24.5	100	98	0.825576	TA	49			.		.		0	plus/minus 1kb	AT3G47480.1	1	1	.
60929	3	17550988	17551010	17540003	17540025	3	7.7	100	46	0.516554	GTG	23.1			AT3G47600.1	1	.		1	exon	AT3G47600.1	1	2	.
60930	3	17552270	17552347	17541285	17541362	2	39	100	156	1.68613	AG	78			.		.		0	DHS	AT3G47600.1	1	1	DHS
60946	3	17570646	17570667	17559661	17559682	3	7.3	100	44	0.435838	CAA	21.9			AT3G47620.1	1	.		1	exon	AT3G47620.1	1	2	.
61001	3	17647984	17648014	17636999	17637029	5	6.2	92	55	0.0639212	TCGGG	31			.		.		0	DHS	AT3G47810.2	1	1	DHS
61022	3	17689471	17689521	17678486	17678536	2	25.5	95	95	0.85203	GA	51			AT3G47910.1	1	AT3G47910.1	1	2	intron/DHS	AT3G47910.1	1	3	DHS
61028	3	17700104	17700125	17689119	17689140	3	7.3	100	44	0.435838	GAA	21.9			AT3G47940.1	1	.		1	exon	AT3G47940.1	1	2	.
61038	3	17715507	17715543	17704522	17704558	3	12	97	67	1.00818	ATG	36	NC_813_ATG		.		.		0	DHS/non gene	.			DHS
61073	3	17763156	17763175	17752171	17752190	3	6.7	100	40	0.303382	GTG	20.1			AT3G48070.2	1	AT3G48070.2	1	2	intron	AT3G48080.1	1	3	.
61173	3	17916694	17916716	17905709	17905731	4	5.8	100	46	0.0870131	AACC	23.2			.		.		0	DHS	AT3G48350.1	1	1	DHS
61190	3	17950540	17950559	17939555	17939574	3	6.7	100	40	0.303382	ATG	20.1			AT3G48430.1	1	.		1	exon	AT3G48430.1	1	2	.
61193	3	17952627	17952653	17941642	17941668	3	8.7	95	47	0.596826	GAA	26.1			AT3G48440.1	1	.		1	exon	AT3G48440.1	1	2	.
61225	3	18014498	18014517	18003513	18003532	3	6.7	100	40	0.303382	TGT	20.1			AT3G48560.1	1	.		1	exon/DHS	AT3G48560.1	1	2	DHS
61303	3	18087003	18087023	18076018	18076038	3	7	100	42	0.37134	CTT	21			AT3G48760.1	1	AT3G48760.1	1	2	intron	AT3G48760.1	1	3	.
61318	3	18112256	18112336	18101271	18101351	2	40.5	100	162	1.87157	AG	81			AT3G48820.1	1	AT3G48820.1	1	2	intron	AT3G48820.1	1	3	.
61522	3	18402249	18402271	18391264	18391286	3	8	90	41	0.379879	TCT	24			AT3G49610.1	1	.		1	exon	AT3G49610.1	1	2	.
61527	3	18406144	18406175	18395159	18395190	2	16	100	64	1.09435	AT	32			AT3G49620.1	1	AT3G49620.1	1	2	intron	AT3G49620.1	1	3	.
61535	3	18428741	18428765	18417756	18417780	3	8.3	90	43	0.438104	CTC	24.9			AT3G49670.1	1	AT3G49668.1	1	2	intron	AT3G49670.1	1	3	.
61545	3	18443110	18443164	18432125	18432179	2	28	96	105	0.83506	AT	56			.		.		0		.			.
61546	3	18445346	18445391	18434361	18434406	2	23.5	95	87	0.893802	TA	47			.		.		0	plus/minus 1kb	AT3G49700.1	1	1	.
61603	3	18509424	18509451	18498439	18498466	3	9.3	100	56	0.78188	CTT	27.9			.		.		0	plus/minus 1kb	AT3G49880.1	1	1	.
61604	3	18509488	18509536	18498503	18498551	3	16.3	100	98	1.1138	TTG	48.9			.		.		0	plus/minus 1kb	AT3G49880.1	1	1	.
61657	3	18570065	18570087	18559082	18559104	3	7.7	100	46	0.516554	AGA	23.1			.		.		0	DHS	AT3G50060.1	1	1	DHS
61673	3	18589434	18589458	18578451	18578475	4	6.2	100	50	0.191715	TCTT	24.8			AT3G50100.1	1	AT3G50100.1	1	2	intron	AT3G50100.1	1	3	.
61747	3	18664274	18664319	18653292	18653337	2	23	100	92	0.861734	AT	46			.		.		0	plus/minus 1kb	AT3G50320.1	1	1	.
61760	3	18714443	18714464	18703462	18703483	3	7.3	100	44	0.435838	TGG	21.9			AT3G50390.1	1	.		1	exon	AT3G50390.1	1	2	.
61812	3	18771002	18771023	18760021	18760042	2	11	100	44	0.954678	TA	22			AT3G50550.1	1	AT3G50550.1	1	2	intron	AT3G50550.1	1	3	.
61850	3	18813091	18813111	18802110	18802130	3	7	100	42	0.37134	AAG	21			.		.		0	DHS	AT3G50630.1	1	1	DHS
61914	3	18867833	18867857	18856852	18856876	3	8.3	90	43	0.438104	TTG	24.9			.		.		0	DHS	AT3G50740.1	1	1	DHS
61972	3	18930599	18930631	18919618	18919650	3	11	100	66	0.971797	TTC	33			.		.		0	plus/minus 1kb	AT3G50910.1	1	1	.
62040	3	19010524	19010546	18999545	18999567	2	11.5	100	46	0.993576	AG	23			.		.		0	DHS	AT3G51140.1	1	1	DHS
62068	3	19068391	19068429	19057412	19057450	2	19.5	100	78	0.989118	AT	39			AT3G51340.1	1	AT3G51340.1	1	2	intron	AT3G51340.1	1	3	.
62074	3	19086495	19086557	19075516	19075578	2	31.5	100	126	0.96373	CT	63			.		.		0	DHS	AT3G51390.1	1	1	DHS
62092	3	19131491	19131515	19120512	19120536	3	8	95	43	0.469246	AGA	24			AT3G51550.1	1	.		1	exon	AT3G51550.1	1	2	.
62097	3	19142705	19142743	19131726	19131764	2	19.5	100	78	0.989118	TA	39			AT3G51580.1	1	AT3G51580.1	1	2	intron	AT3G51580.1	1	3
62206	3	19313884	19313903	19302906	19302925	3	6.7	100	40	0.303382	TGT	20.1			AT3G52030.1	1	.		1	exon	AT3G52030.1	1	2	.
62212	3	19323040	19323065	19312062	19312087	3	8.7	100	52	0.692832	GAA	26.1			.		.		0	DHS	AT3G52070.1	1	1	DHS
62229	3	19364238	19364257	19353260	19353279	3	6.7	100	40	0.303382	AAG	20.1			AT3G52180.1	1	.		1	exon	AT3G52180.1	1	2	.
62492	3	19690153	19690205	19679175	19679227	3	17.7	100	106	1.07941	GAA	53.1			.		.		0	plus/minus 1kb	AT3G53080.1	1	1	.
62577	3	19847527	19847550	19836549	19836572	2	12	90	41	0.895204	AT	24			.		AT3G53500.1	1	1	intron	AT3G53510.1	1	2	.
62598	3	19889863	19889882	19878885	19878904	3	6.7	100	40	0.303382	AAT	20.1			.		.		0	DHS	AT3G53610.1	1	1	DHS
62651	3	19977344	19977370	19966366	19966392	4	6.5	95	47	0.156877	CTTT	26			.		.		0	plus/minus 1kb	AT3G53930.1	1	1	.
62656	3	19986452	19986471	19975474	19975493	3	6.7	100	40	0.303382	GTA	20.1			.		.		0	DHS	AT3G53950.1	1	1	DHS
62670	3	20007505	20007524	19996527	19996546	3	6.7	100	40	0.303382	CCA	20.1			.		.		0	DHS	AT3G54000.2	1	1	DHS
62671	3	20007536	20007559	19996558	19996581	3	7.7	90	41	0.31861	CTT	23.1			.		.		0	DHS	AT3G54000.2	1	1	DHS
62725	3	20081623	20081647	20070645	20070669	3	8.3	100	50	0.6266	TCC	24.9			AT3G54220.1	1	.		1	exon	AT3G54220.1	1	2	.
62813	3	20231358	20231382	20220380	20220404	2	12.5	91	43	0.949864	TC	25			.		.		0	DHS	AT3G54620.1	1	1	DHS
62875	3	20329441	20329479	20318463	20318501	3	12.7	94	71	1.02464	TCT	38.1			.		.		0	DHS	AT3G54840.1	1	1	DHS
62901	3	20363552	20363571	20352574	20352593	3	6.7	100	40	0.303382	TTG	20.1			AT3G54930.1	1	.		1	exon	AT3G54930.1	1	2	.
62916	3	20386273	20386318	20375296	20375341	2	23	100	92	0.861734	AT	46			AT3G54990.1	1	AT3G54990.1	1	2	intron/DHS	AT3G54990.1	1	3	DHS
62919	3	20387295	20387317	20376318	20376340	3	7.7	100	46	0.516554	GAG	23.1			AT3G54990.1	1	.		1	exon	AT3G54990.1	1	2	.
62930	3	20405888	20405923	20394911	20394946	2	18	100	72	1.04375	CT	36			.		.		0	DHS	AT3G55020.1	1	1	DHS
63028	3	20572066	20572085	20561089	20561108	3	6.7	100	40	0.303382	TCC	20.1			AT3G55460.1	1	.		1	exon	AT3G55460.1	1	2	.
63029	3	20572096	20572119	20561119	20561142	3	8	100	48	0.573207	TGG	24			AT3G55460.1	1	.		1	exon	AT3G55460.1	1	2	.
63034	3	20575229	20575287	20564251	20564309	3	19.7	92	104	1.04654	TTC	59.1			.		.		0	DHS	AT3G55460.1	1	1	DHS
63055	3	20604675	20604695	20593696	20593716	3	7	100	42	0.37134	AAG	21			.		.		0	DHS	AT3G55520.1	1	1	DHS
63079	3	20645238	20645277	20634259	20634298	3	13	94	73	1.04088	TTC	39			.		.		0	DHS	AT3G55620.1	1	1	DHS
63083	3	20656317	20656371	20645338	20645392	2	27.5	100	110	0.815881	AT	55			AT3G55646.1	1	AT3G55646.1	1	2	intron	AT3G55646.1	1	3	.
63088	3	20659947	20659967	20648968	20648988	3	7	100	42	0.37134	ACA	21	HS_363_ACA_unk		.		.		0	plus/minus 1kb	AT3G55660.1	1	1		1	2	HS/5'3'	id-1033548
63169	3	20725635	20725655	20714656	20714676	3	7	100	42	0.37134	AGA	21			.		.		0	DHS	AT3G55820.1	1	1	DHS
63210	3	20773932	20773952	20762953	20762973	3	7	100	42	0.37134	AGA	21			.		.		0	plus/minus 1kb	AT3G55960.1	1	1
63211	3	20774013	20774110	20763034	20763131	2	49	100	196	2.85862	AG	98			.		.		0	DHS	AT3G55960.1	1	1	DHS
63320	3	20945423	20945457	20934444	20934478	2	17.5	93	63	1.07374	CT	35			.		.		0	DHS	AT3G56470.1	1	1	DHS
63343	3	20971214	20971284	20960235	20960305	3	23.7	91	121	0.937616	AAG	71.1			AT3G56570.1	1	.		1	exon	AT3G56570.1	1	2	.
63374	3	21031205	21031239	21020226	21020260	3	11.7	100	70	1.0256	GAA	35.1			.		.		0	plus/minus 1kb	AT3G56760.1	1	1	.
63490	3	21249620	21249643	21238643	21238666	3	8	90	41	0.379879	TCT	24			AT3G57400.1	1	.		1	exon	AT3G57400.1	1	2	.
63563	3	21383274	21383316	21372297	21372339	3	13.7	90	60	1.03752	TTA	41.1			AT3G57670.1	1	AT3G57670.1	1	2	intron	AT3G57670.1	1	3	.
63623	3	21481347	21481385	21470370	21470408	3	13	100	78	1.09264	GTT	39	CD_163_GTT_unk		AT3G57990.1	1	.		1	exon	AT3G57990.1	1	2	.
63630	3	21491466	21491496	21480489	21480519	3	10.3	92	55	0.785797	AGA	30.9			AT3G58020.1	1	.		1	exon	AT3G58020.1	1	2	.
63634	3	21494028	21494074	21483051	21483097	3	15.7	95	87	1.10947	ATC	47.1	NC_823_ATC		.		.		0		.			.
63644	3	21503121	21503167	21492144	21492190	2	23.5	91	80	0.939052	TC	47			.		.		0	DHS	AT3G58050.1	1	1	DHS
63650	3	21510944	21510964	21499967	21499987	3	7	100	42	0.37134	GAT	21			.		.		0	DHS	AT3G58060.1	1	1	DHS
63764	3	21686144	21686166	21675167	21675189	2	11.5	100	46	0.993576	TG	23			.		.		0	DHS	AT3G58610.1	1	1	DHS
63827	3	21785828	21785895	21774851	21774918	3	22.7	100	136	0.900754	AAG	68.1			.		.		0	plus/minus 1kb	AT3G58900.1	1	1	.
63885	3	21922819	21922841	21911842	21911864	2	11.5	100	46	0.993576	TA	23			.		AT3G59290.1	1	1	intron	AT3G59290.1	1	2	.
63903	3	21953407	21953426	21942430	21942449	2	10	100	40	0.855577	AT	20			AT3G59370.1	1	AT3G59370.1	1	2	intron	AT3G59370.1	1	3	.
63915	3	21964091	21964201	21953114	21953224	2	55.5	100	222	3.29704	TC	111			AT3G59410.1	1	AT3G59410.1	1	2	intron	AT3G59410.1	1	3	.
63967	3	22034858	22034898	22023881	22023921	2	21	92	70	0.996353	AT	42			.		AT3G59620.1	1	1	intron	AT3G59620.1	1	2	.
64002	3	22086161	22086180	22075184	22075203	3	6.7	100	40	0.303382	AGA	20.1			AT3G59760.1	1	.		1	exon	AT3G59760.1	1	2	.
64041	3	22134635	22134672	22123658	22123695	3	12.7	100	76	1.0807	CTT	38.1			.		.		0	plus/minus 1kb	AT3G59890.2	1	1	.
64076	3	22182669	22182695	22171692	22171718	3	9	100	54	0.738874	TTC	27	NC_833_TTC		.		.		0		.			.
64153	3	22272889	22272908	22261914	22261933	3	6.7	100	40	0.303382	CAA	20.1			AT3G60240.2	1	.		1	exon	AT3G60240.2	1	2	.
64163	3	22289694	22289713	22278719	22278738	3	6.7	100	40	0.303382	AGG	20.1			AT3G60270.1	1	.		1	exon	AT3G60270.1	1	2	.
64204	3	22358878	22358899	22347903	22347924	2	11	100	44	0.954678	CA	22			AT3G60480.1	1	AT3G60480.1	1	2	intron	AT3G60480.1	1	3	.
64223	3	22391575	22391594	22380600	22380619	3	6.7	100	40	0.303382	CAT	20.1			AT3G60550.1	1	.		1	exon	AT3G60550.1	1	2	.
64230	3	22407840	22407862	22396865	22396887	2	11.5	100	46	0.993576	TA	23			.		.		0		.			.
64250	3	22441175	22441199	22430200	22430224	3	8.3	100	50	0.6266	TTC	24.9			.		.		0	plus/minus 1kb	AT3G60680.1	1	1	.
64265	3	22464933	22464956	22453958	22453981	3	7.7	95	41	0.409266	CTT	23.1			.		.		0	DHS	AT3G60750.1	1	1	DHS
64270	3	22475609	22475631	22464634	22464656	3	7.7	100	46	0.516554	ATC	23.1			AT3G60790.1	1	.		1	exon	AT3G60790.1	1	2	.
64283	3	22502109	22502134	22491134	22491159	3	8.7	91	45	0.530293	AAG	26.1			AT3G60860.1	1	.		1	exon	AT3G60860.1	1	2	.
64287	3	22506151	22506174	22495176	22495199	2	12	100	48	1.02588	CT	24			AT3G60880.1	1	AT3G60880.1	1	2	intron	AT3G60880.1	1	3	.
64366	3	22628089	22628108	22617114	22617133	2	10	100	40	0.855577	AT	20			.		AT3G61118.1	1	1	intron	AT3G61117.1	1	2	.
64368	3	22628853	22628886	22617878	22617911	3	11.3	93	47	0.908504	ACT	33.9			.		.		0	plus/minus 1kb	AT3G61120.1	1	1	.
64385	3	22653843	22653902	22642868	22642927	6	10	96	106	0.855486	TCATTA	60			.		.		0	plus/minus 1kb	AT3G61175.1	1	1	.
64426	3	22698083	22698112	22687108	22687137	2	15	100	60	1.10325	AT	30			.		.		0	plus/minus 1kb	AT3G61290.1	1	1	.
64479	3	22760830	22760858	22749855	22749883	3	9.7	92	51	0.705979	TCT	29.1			.		.		0	plus/minus 1kb	AT3G61480.1	1	1	.
64497	3	22797045	22797070	22786070	22786095	2	13	91	45	0.982079	GA	26			.		.		0	DHS	AT3G61580.1	1	1	DHS
64519	3	22846599	22846627	22835624	22835652	2	14.5	100	58	1.1022	TA	29			.		AT3G61700.1	1	1	intron	AT3G61700.1	1	2	.
64541	3	22877495	22877517	22866520	22866542	2	11.5	100	46	0.993576	AC	23			.		.		0	plus/minus 1kb	AT3G61770.1	1	1	.
64568	3	22933005	22933039	22922030	22922064	2	17.5	93	63	1.07374	TC	35			.		.		0	DHS	AT3G61898.1	1	1	DHS
64597	3	23001543	23001576	22990568	22990601	2	17	100	68	1.07348	AT	34			.		AT3G62090.1	1	1	intron	AT3G62090.1	1	2	.
64611	3	23042062	23042124	23031087	23031149	2	31.5	100	126	0.96373	GA	63			.		.		0	DHS	AT3G62220.1	1	1	DHS
64666	3	23148480	23148512	23137504	23137536	3	10.7	96	59	0.884864	AGA	32.1			.		.		0	DHS	AT3G62550.1	1	1	DHS
64669	3	23153512	23153540	23142536	23142564	2	14.5	100	58	1.1022	TC	29			.		.		0	DHS	AT3G62570.1	1	1	DHS
64671	3	23161178	23161210	23150202	23150234	3	11	93	59	0.878982	TTC	33			.		.		0	DHS	AT3G62590.1	1	1	DHS
64679	3	23175488	23175511	23164512	23164535	3	8	90	41	0.379879	CTT	24			AT3G62630.1	1	.		1	exon	AT3G62630.1	1	2
64682	3	23179429	23179463	23168453	23168487	2	17.5	100	70	1.05953	TC	35			.		AT3G62650.2	1	1	intron/DHS	AT3G62650.2	1	2	DHS
64686	3	23183961	23183982	23172985	23173006	3	7.3	100	44	0.435838	CTT	21.9			.		.		0	DHS	AT3G62660.1	1	1	DHS
64748	3	23300902	23300931	23289927	23289956	2	15	100	60	1.10325	CT	30			AT3G63010.1	1	AT3G63010.1	1	2	intron	AT3G63010.1	1	3	.
64802	3	23416636	23416663	23405661	23405688	2	14	92	49	1.04094	GA	28			AT3G63370.1	1	AT3G63370.1	1	2	intron	AT3G63370.1	1	3	.
64807	3	23427384	23427421	23416409	23416446	3	13	94	71	1.04088	AAG	39			AT3G63410.1	1	AT3G63410.1	1	2	intron	AT3G63400.1	1	3	.
64810	3	23431691	23431717	23420716	23420742	3	9	91	47	0.581349	TCT	27			AT3G63430.1	1	.		1	exon	AT3G63430.1	1	2	.
64889	4	59145	59167	59145	59167	3	7.7	100	46	0.516554	TCT	23.1			.		.		0	DHS	AT4G00150.1	1	1	DHS
64895	4	74707	74732	74707	74732	3	8.7	91	45	0.530293	GGA	26.1			AT4G00180.1	1	.		1	exon	AT4G00180.1	1	2	.
64896	4	75334	75354	75334	75354	2	10.5	100	42	0.908802	AG	21			.		.		0	plus/minus 1kb	AT4G00180.1	1	1	.
64903	4	82792	82817	82792	82817	3	8.7	91	45	0.530293	GGA	26.1			AT4G00200.1	1	.		1	exon	AT4G00190.1	1	2	.
64938	4	112932	112952	112932	112952	3	7	100	42	0.37134	CTT	21			AT4G00250.1	1	.		1	exon	AT4G00250.1	1	2	.
64958	4	130709	130732	130709	130732	2	12	100	48	1.02588	AT	24			.		.		0	DHS	AT4G00300.1	1	1	DHS
65043	4	227441	227470	227441	227470	5	6	100	60	0.151285	GTCGG	30			.		.		0	DHS	AT4G00500.1	1	1	DHS
65098	4	324973	325001	324973	325001	5	5.8	100	58	0.0979872	ATTCA	29			.		.		0	DHS	AT4G00755.1	1	1	DHS
65128	4	366519	366544	366519	366544	2	13	100	52	1.07224	AT	26			.		.		0	plus/minus 1kb	AT4G00880.1	1	1	.
65129	4	366546	366595	366546	366595	3	16.7	100	100	1.10582	AAC	50.1			.		.		0	plus/minus 1kb	AT4G00880.1	1	1	.
65156	4	388432	388459	388432	388459	3	9.3	92	49	0.646654	CTT	27.9			AT4G00905.1	1	.		1	exon	AT4G00910.1	1	2	.
65159	4	391968	391993	391968	391993	2	13	100	52	1.07224	AT	26			.		.		0	DHS	AT4G00910.1	1	1	DHS
65164	4	401388	401407	401388	401407	3	6.7	100	40	0.303382	GGA	20.1			.		.		0	plus/minus 1kb	AT4G00930.1	1	1	.
65200	4	457810	457846	457810	457846	6	6.2	90	53	0.0731008	GAGCCA	37.2			AT4G01050.1	1	.		1	exon	AT4G01050.1	1	2	.
65213	4	468168	468199	468168	468199	3	10.7	100	64	0.944588	AGA	32.1			AT4G01080.1	1	.		1	exon	AT4G01080.1	1	2	.
65285	4	559422	559475	559422	559475	2	27	100	108	0.810782	TA	54			.		.		0	DHS	AT4G01350.1	1	1	DHS
65291	4	571084	571112	571084	571112	2	14.5	92	51	1.05688	AG	29			AT4G01390.1	1	AT4G01390.1	1	2	intron	AT4G01390.1	1	3	.
65307	4	587025	587044	587025	587044	2	10	100	40	0.855577	TA	20			AT4G01430.1	1	AT4G01430.1	1	2	intron	AT4G01430.1	1	3	.
65351	4	627917	627938	627917	627938	3	7.3	100	44	0.435838	TTG	21.9			.		.		0	DHS	AT4G01480.1	1	1	DHS
65380	4	658644	658670	658644	658670	3	9	91	47	0.581349	CAA	27			AT4G01520.1	1	AT4G01520.1	1	2	intron	AT4G01520.1	1	3	.
65385	4	659451	659544	659451	659544	2	47	97	181	2.24915	TC	94			.		.		0	plus/minus 1kb	AT4G01520.1	1	1	.
65400	4	672378	672397	672378	672397	3	6.7	100	40	0.303382	CAA	20.1			AT4G01540.1	1	AT4G01540.1	1	2	intron	AT4G01540.1	1	3	.
65513	4	793461	793486	793461	793486	3	8.7	91	45	0.530293	CCT	26.1			AT4G01840.1	1	.		1	exon/DHS	AT4G01840.1	1	2	DHS
65543	4	834658	834682	834658	834682	3	8.3	100	50	0.6266	GAA	24.9			.		.		0	DHS	AT4G01925.1	1	1	DHS
65631	4	921486	921507	921486	921507	2	11	100	44	0.954678	TC	22			.		.		0	DHS	AT4G02080.1	1	1	DHS
65641	4	941710	941747	941710	941747	3	12.7	100	76	1.0807	TCC	38.1	IN_494_TCC_ctpsynfam		AT4G02120.1	1	AT4G02120.1	1	2	intron/DHS	AT4G02120.1	1	3	DHS
65677	4	985715	985749	985715	985749	2	17.5	100	70	1.05953	GA	35			AT4G02260.3	1	AT4G02260.3	1	2	intron	AT4G02260.3	1	3	.
65704	4	1012103	1012124	1012103	1012124	2	11	100	44	0.954678	TA	22			AT4G02300.1	1	AT4G02300.1	1	2	intron	AT4G02300.1	1	3	.
65791	4	1076326	1076346	1076326	1076346	3	7	100	42	0.37134	CAT	21			AT4G02460.1	1	.		1	exon	AT4G02450.1	1	2	.
65797	4	1090921	1090948	1090921	1090948	2	14	92	49	1.04094	TC	28			.		.		0		.			.
66010	4	1292698	1292717	1292698	1292717	3	6.7	100	40	0.303382	TTC	20.1			.		.		0	DHS	AT4G02920.1	1	1	DHS
66088	4	1359113	1359136	1359113	1359136	3	8	100	48	0.573207	TGA	24			AT4G03070.1	1	.		1	exon	AT4G03080.1	1	2	.
66130	4	1417495	1417520	1417495	1417520	3	8.3	91	45	0.457624	GAA	24.9			AT4G03220.1	1	.		1	exon	AT4G03220.1	1	2	.
66143	4	1438896	1438920	1438896	1438920	2	12.5	91	43	0.949864	GA	25			.		.		0		.			.
66190	4	1490260	1490285	1490261	1490286	2	13	100	52	1.07224	AT	26			.		.		0	DHS	AT4G03390.1	1	1	DHS
66368	4	1680521	1680547	1680523	1680549	4	6.8	100	54	0.336792	ATTT	27.2			.		.		0		.			.
66655	4	1875391	1875418	1875393	1875420	2	14	100	56	1.09696	AT	28			.		.		0	DHS	AT4G03940.1	1	1	DHS
66776	4	1934303	1934322	1934305	1934324	3	6.7	100	40	0.303382	CTT	20.1			AT4G04030.1	1	.		1	exon	AT4G04020.1	1	2	.
66806	4	1965120	1965146	1965122	1965148	3	9	91	47	0.581349	CTT	27			AT4G04090.1	1	AT4G04090.1	1	2	intron	AT4G04080.1	1	3	.
66949	4	2054090	2054113	2054092	2054115	3	8	100	48	0.573207	TTC	24			.		.		0	plus/minus 1kb	AT4G04260.1	1	1	.
66980	4	2068804	2068848	2068806	2068850	3	15	100	90	1.12635	GAA	45	NC_844_GAA	intergenic	.		.		0		.			.
67222	4	2269181	2269275	2269183	2269277	2	47.5	100	190	2.70921	TC	95			.		.		0		.			.
67240	4	2297447	2297559	2297449	2297561	2	56.5	100	226	3.33269	CT	113			.		.		0		.			.
67285	4	2327863	2327888	2327865	2327890	3	8.7	100	52	0.692832	TCA	26.1			AT4G04614.1	1	.		1	exon	AT4G04620.1	1	2	.
67333	4	2347924	2347955	2347926	2347957	3	10.7	93	57	0.846978	TGA	32.1			.		.		0		.			.
67373	4	2375485	2375509	2375487	2375511	2	12.5	100	50	1.05197	TA	25			.		.		0	DHS	AT4G04690.1	1	1	DHS
67426	4	2412906	2412930	2412908	2412932	3	8.3	90	43	0.438104	AGA	24.9			AT4G04745.1	1	.		1	exon	AT4G04745.1	1	2	.
67439	4	2424190	2424214	2424192	2424216	3	8.3	90	43	0.438104	CTT	24.9			AT4G04760.1	1	.		1	exon	AT4G04760.1	1	2	.
67478	4	2457585	2457605	2457587	2457607	3	7	100	42	0.37134	ATT	21			.		.		0	plus/minus 1kb	AT4G04850.1	1	1	.
67485	4	2460036	2460064	2460038	2460066	3	9.7	100	58	0.834623	AGA	29.1			.		.		0	plus/minus 1kb	AT4G04860.1	1	1	.
67525	4	2487426	2487448	2487428	2487450	2	11.5	100	46	0.993576	TA	23			AT4G04900.1	1	AT4G04900.1	1	2	intron	AT4G04900.1	1	3	.
67531	4	2503284	2503311	2503286	2503313	3	9.3	92	49	0.646654	CTA	27.9			AT4G04920.1	1	.		1	exon	AT4G04920.1	1	2	.
67613	4	2561406	2561441	2561408	2561443	2	18	100	72	1.04375	AT	36			.		.		0		.			.
67628	4	2575663	2575705	2575665	2575707	2	21.5	100	86	0.912027	TA	43			AT4G05020.1	1	AT4G05020.1	1	2	intron	AT4G05020.1	1	3	.
67684	4	2619258	2619280	2619260	2619282	3	7.7	100	46	0.516554	CAT	23.1			AT4G05100.1	1	.		1	exon	AT4G05100.1	1	2	.
67777	4	2687336	2687357	2687338	2687359	3	7.3	100	44	0.435838	CAA	21.9			AT4G05230.1	1	.		1	exon	AT4G05240.1	1	2
67950	4	2804401	2804436	2804404	2804439	2	18	94	65	1.06283	CT	36			.		.		0	DHS	AT4G05520.1	1	1	DHS
68836	4	3416313	3416336	3416316	3416339	4	6.2	95	43	0.0798214	TTGT	24.8			.		.		0		.			.
68959	4	3523326	3523360	3523329	3523363	4	8.8	90	49	0.564182	ATAT	35.2			.		.		0		.			.
69144	4	3684343	3684366	3684346	3684369	3	8	100	48	0.573207	AAG	24			.		.		0		.			.
69516	4	4031096	4031119	4031099	4031122	3	8	100	48	0.573207	CTG	24	NC_854_CTG		.		.		0		.			.
69626	4	4104645	4104688	4104648	4104691	2	22	95	81	0.937937	AT	44			.		.		0		.			.
69707	4	4196463	4196488	4196466	4196491	2	13	100	52	1.07224	TG	26			AT4G07390.1	1	AT4G07390.1	1	2	intron	AT4G07390.1	1	3	.
69780	4	4254513	4254537	4254516	4254540	3	8.3	100	50	0.6266	AAG	24.9	NC_864_AAG		.		.		0		.			.
70913	4	5019789	5019811	5019792	5019814	2	11.5	100	46	0.993576	AT	23			.		.		0		.			.
71200	4	5203788	5203892	5203791	5203895	2	52.5	100	210	3.13929	GA	105			.		.		0		.			.
71251	4	5253193	5253213	5253196	5253216	3	7	100	42	0.37134	ACC	21			AT4G08320.1	1	.		1	exon	AT4G08320.1	1	2	.
71253	4	5256428	5256453	5256431	5256456	3	9	91	47	0.581349	GAA	27			AT4G08330.1	1	.		1	exon	AT4G08330.1	1	2	.
71441	4	5360876	5361041	5360879	5361044	2	83	98	325	2.59328	AG	166			.		.		0		.			.
71592	4	5448831	5448867	5448834	5448870	2	18.5	100	74	1.02652	AT	37			.		.		0	plus/minus 1kb	AT4G08555.1	1	1	.
72017	4	5674103	5674133	5674106	5674136	2	15.5	100	62	1.10049	TA	31			AT4G08875.1	1	AT4G08875.1	1	2	intron	AT4G08874.1	1	3	.
72184	4	5781576	5781598	5781579	5781601	3	7.7	100	46	0.516554	CAT	23.1			AT4G09012.1	1	AT4G09012.1	1	2	intron	AT4G09012.1	1	3	.
72193	4	5797068	5797087	5797071	5797090	3	6.7	100	40	0.303382	GAA	20.1			AT4G09040.1	1	AT4G09040.2	1	2	intron	AT4G09040.1	1	3	.
72202	4	5803881	5803904	5803884	5803907	3	8	90	41	0.379879	TTC	24			.		.		0	plus/minus 1kb	AT4G09080.1	1	1	.
72211	4	5809157	5809185	5809160	5809188	2	14.5	100	58	1.1022	TA	29			.		.		0		.			.
72252	4	5842652	5842679	5842655	5842682	2	14	100	56	1.09696	AT	28			.		.		0	DHS	AT4G09170.1	1	1	DHS
72464	4	5944235	5944258	5944238	5944261	3	8	100	48	0.573207	GAT	24			.		.		0	plus/minus 1kb	AT4G09360.1	1	1	.
72569	4	6008309	6008348	6008312	6008351	4	10	91	59	0.762264	TCTC	40			.		.		0		.			.
72575	4	6017285	6017333	6017288	6017336	2	24.5	91	84	0.916532	AT	49			.		.		0	plus/minus 1kb	AT4G09490.1	1	1	.
72657	4	6089608	6089635	6089611	6089638	2	14	100	56	1.09696	AG	28			AT4G09640.1	1	AT4G09640.1	1	2	intron	AT4G09640.1	1	3	.
72668	4	6100146	6100180	6100149	6100183	2	18	94	65	1.06283	AT	36			.		.		0	DHS	AT4G09650.1	1	1	DHS
72726	4	6151968	6151995	6151971	6151998	3	9.3	92	49	0.646654	AAT	27.9			.		.		0	plus/minus 1kb	AT4G09760.3	1	1	.
72902	4	6283890	6283920	6283893	6283923	2	16	93	57	1.08355	TA	32			.		.		0	plus/minus 1kb	AT4G10050.1	1	1	.
72904	4	6287251	6287271	6287254	6287274	3	7	100	42	0.37134	TCT	21			.		.		0	DHS	AT4G10050.1	1	1	DHS
72972	4	6346440	6346463	6346444	6346467	2	12	90	41	0.895204	TC	24			.		.		0	DHS	AT4G10180.1	1	1	DHS
72982	4	6356405	6356425	6356409	6356429	3	7	100	42	0.37134	ATT	21			.		.		0	plus/minus 1kb	AT4G10200.1	1	1	.
72995	4	6362873	6362903	6362877	6362907	2	15.5	100	62	1.10049	TA	31			AT4G10220.1	1	AT4G10220.1	1	2	intron	AT4G10220.1	1	3	.
73024	4	6384856	6384880	6384860	6384884	3	8	95	43	0.469246	TTG	24			AT4G10300.1	1	AT4G10300.1	1	2	intron	AT4G10300.1	1	3	.
73026	4	6385226	6385249	6385230	6385253	3	8.3	90	43	0.438104	TTG	24.9			AT4G10300.1	1	AT4G10300.1	1	2	intron	AT4G10300.1	1	3	.
73034	4	6395345	6395378	6395349	6395382	2	17.5	93	63	1.07374	AT	35			AT4G10310.1	1	AT4G10310.1	1	2	intron	AT4G10310.1	1	3	.
73054	4	6416517	6416568	6416521	6416572	2	26	96	97	0.836664	AT	52			AT4G10350.1	1	AT4G10350.1	1	2	intron	AT4G10350.1	1	3	.
73099	4	6454739	6454758	6454743	6454762	3	6.7	100	40	0.303382	AAG	20.1			.		.		0	DHS	AT4G10420.1	1	1	DHS
73101	4	6459727	6459761	6459731	6459765	3	11.7	93	63	0.944133	GTT	35.1			AT4G10440.1	1	.		1	exon	AT4G10440.1	1	2	.
73178	4	6548890	6548949	6548894	6548953	10	6	98	113	0.163479	ATGGGCCGGG	60			.		.		0	plus/minus 1kb	AT4G10600.1	1	1	.
73208	4	6567473	6567497	6567477	6567501	3	8.3	90	43	0.438104	AGG	24.9			AT4G10630.1	1	.		1	exon	AT4G10630.1	1	2	.
73253	4	6614594	6614614	6614598	6614618	3	7	100	42	0.37134	CAC	21			AT4G10730.1	1	.		1	exon	AT4G10730.1	1	2	.
73370	4	6698620	6698645	6698624	6698649	3	8.3	95	45	0.526017	AAC	24.9			AT4G10920.1	1	AT4G10920.1	1	2	intron	AT4G10920.1	1	3	.
73378	4	6705786	6705829	6705790	6705833	6	7.3	100	88	0.471118	CCTTCT	43.8	CD_174_CCTTCT_unk		AT4G10930.1	1	.		1	exon/DHS	AT4G10930.1	1	2	DHS
73407	4	6746695	6746738	6746699	6746742	3	14.7	100	88	1.12583	ATT	44.1		intergenic	.		.		0	plus/minus 1kb	AT4G11040.1	1	1	.
73415	4	6759707	6759726	6759711	6759730	3	6.7	100	40	0.303382	TAA	20.1			AT4G11070.1	1	AT4G11070.1	1	2	intron	AT4G11070.1	1	3	.
73442	4	6789861	6789893	6789865	6789897	4	8.8	90	49	0.564182	AAAT	35.2			.		.		0		.			.
73517	4	6845449	6845468	6845453	6845472	3	6.7	100	40	0.303382	GGA	20.1			AT4G11230.1	1	.		1	exon	AT4G11230.1	1	2	.
73563	4	6898625	6898692	6898630	6898697	2	34.5	97	131	1.11136	TA	69			AT4G11340.1	1	AT4G11340.1	1	2	intron	AT4G11340.1	1	3	.
73595	4	6927134	6927200	6927139	6927205	3	22.3	100	134	0.913445	TTC	66.9	CD_184_TTC_unk		AT4G11385.1	1	.		1	exon	AT4G11385.1	1	2	.
73612	4	6947034	6947071	6947039	6947076	3	12.7	100	76	1.0807	GAA	38.1	IN_504_GAA_unk		AT4G11410.1	1	AT4G11410.1	1	2	intron	AT4G11420.1	1	3	.
73627	4	6961983	6962008	6961988	6962013	2	13	91	45	0.982079	TC	26			.		.		0	DHS	AT4G11450.1	1	1	DHS
73639	4	6976468	6976504	6976473	6976509	4	9.2	96	46	0.71245	TATT	36.8			.		.		0	plus/minus 1kb	AT4G11485.1	1	1	.
73666	4	7011235	7011262	7011241	7011268	3	9.3	100	56	0.78188	TGA	27.9			AT4G11600.1	1	.		1	exon/DHS	AT4G11600.1	1	2	DHS
73783	4	7143333	7143368	7143339	7143374	2	18	100	72	1.04375	TA	36			.		AT4G11880.1	1	1	intron	AT4G11880.1	1	2
73788	4	7146453	7146488	7146459	7146494	2	18	94	65	1.06283	AC	36			AT4G11880.1	1	AT4G11880.1	1	2	intron/DHS	AT4G11880.1	1	3	DHS
73821	4	7180365	7180398	7180371	7180404	3	10.3	90	40	0.752856	AGA	30.9			.		.		0	DHS	AT4G11970.1	1	1	DHS
73823	4	7183195	7183214	7183201	7183220	2	10	100	40	0.855577	CT	20			AT4G11970.2	1	AT4G11970.1	1	2	intron	AT4G11970.1	1	3	.
73871	4	7221025	7221074	7221031	7221080	3	16.7	91	86	1.10104	TGT	50.1			AT4G12050.1	1	.		1	exon	AT4G12050.1	1	2	.
73985	4	7352710	7352731	7352713	7352734	3	7.3	100	44	0.435838	AGA	21.9			AT4G12420.1	1	AT4G12420.1	1	2	intron/DHS	AT4G12420.1	1	3	DHS
74060	4	7402010	7402033	7402013	7402036	2	12	100	48	1.02588	TA	24			.		.		0	DHS	AT4G12470.1	1	1	DHS
74235	4	7549125	7549193	7549127	7549195	2	34.5	97	131	1.11136	TA	69			AT4G12900.1	1	AT4G12900.1	1	2	intron	AT4G12900.1	1	3	.
74356	4	7636977	7637020	7636980	7637023	4	11	90	74	0.867502	CTAA	44			AT4G13100.1	1	AT4G13100.1	1	2	intron	AT4G13100.1	1	3	.
74375	4	7654236	7654271	7654240	7654275	6	6	100	72	0.163536	CAAGAA	36	CD_194_CAAGAA_unk		AT4G13160.1	1	.		1	exon	AT4G13160.1	1	2	.
74377	4	7656538	7656557	7656542	7656561	3	6.7	100	40	0.303382	TCT	20.1			.		.		0	DHS	AT4G13170.1	1	1	DHS
74531	4	7800324	7800357	7800328	7800361	2	17	100	68	1.07348	TA	34			AT4G13420.1	1	AT4G13420.1	1	2	intron	AT4G13420.1	1	3	.
74535	4	7807192	7807261	7807196	7807265	3	23.3	100	140	0.883484	AGA	69.9	IN_514_AGA_iil1		AT4G13430.1	1	AT4G13430.1	1	2	intron	AT4G13430.1	1	3	.
74536	4	7807491	7807511	7807495	7807515	3	7	100	42	0.37134	AAG	21			AT4G13430.1	1	AT4G13430.1	1	2	intron	AT4G13430.1	1	3	.
74537	4	7807789	7807812	7807793	7807816	3	8	90	41	0.379879	TTC	24			.		.		0	DHS	AT4G13430.1	1	1	DHS
74596	4	7842738	7842768	7842742	7842772	3	10.3	100	62	0.904241	AAT	30.9	NC_874_AAT		.		.		0		.			.
74647	4	7892677	7892722	7892681	7892726	2	23	100	92	0.861734	AT	46			.		AT4G13575.1	1	1	intron	AT4G13575.1	1	2	.
74862	4	8179559	8179578	8179564	8179583	3	6.7	100	40	0.303382	TTG	20.1			AT4G14180.1	1	AT4G14180.1	1	2	intron	AT4G14180.1	1	3	.
74867	4	8195900	8195931	8195905	8195936	3	10.7	100	64	0.944588	TCT	32.1			.		.		0	DHS	AT4G14220.1	1	1	DHS
74900	4	8255426	8255473	8255430	8255477	3	16	100	96	1.11862	AGA	48			.		.		0	DHS	AT4G14342.1	1	1	DHS
74917	4	8271079	8271101	8271083	8271105	2	11.5	100	46	0.993576	AG	23			.		.		0	DHS	AT4G14360.1	1	1	DHS
75040	4	8453756	8453776	8453761	8453781	3	7	100	42	0.37134	TTC	21			AT4G14740.1	1	.		1	exon	AT4G14740.1	1	2	.
75045	4	8457524	8457544	8457529	8457549	3	7	100	42	0.37134	AAT	21			.		.		0		.			.
75077	4	8502471	8502499	8502476	8502504	3	9.7	92	51	0.705979	TGG	29.1			AT4G14805.1	1	.		1	exon	AT4G14800.1	1	2	.
75092	4	8531625	8531668	8531629	8531672	3	14.3	92	74	1.07766	GAA	42.9			AT4G14920.1	1	AT4G14920.1	1	2	intron	AT4G14920.1	1	3	.
75133	4	8593526	8593552	8593530	8593556	2	13.5	100	54	1.08711	AT	27			AT4G15053.1	1	AT4G15053.1	1	2	intron	AT4G15053.1	1	3	.
75137	4	8595498	8595524	8595502	8595528	3	9.3	92	49	0.646654	GAA	27.9			.		.		0	plus/minus 1kb	AT4G15056.1	1	1	.
75236	4	8735436	8735475	8735436	8735475	3	12.3	97	59	1.02738	TAT	36.9			.		.		0		.			.
75319	4	8800482	8800505	8800482	8800505	3	8	90	41	0.379879	ATT	24			.		.		0		.			.
75397	4	8864875	8864903	8864877	8864905	3	9.7	100	58	0.834623	CAA	29.1			AT4G15530.2	1	AT4G15530.2	1	2	intron	AT4G15530.2	1	3	.
75400	4	8875937	8875960	8875939	8875962	3	7.7	95	41	0.409266	AGA	23.1			AT4G15545.1	1	.		1	exon/DHS	AT4G15540.1	1	2	DHS
75423	4	8913428	8913449	8913430	8913451	3	7.3	100	44	0.435838	TAT	21.9			.		.		0	DHS	AT4G15620.1	1	1	DHS
75500	4	9012445	9012477	9012430	9012462	4	8.2	93	52	0.501021	TATT	32.8			.		.		0	DHS	AT4G15880.1	1	1	DHS
75517	4	9052964	9052983	9052952	9052971	3	6.7	100	40	0.303382	CTT	20.1			AT4G15975.1	1	.		1	exon	AT4G15975.1	1	2	.
75538	4	9086780	9086841	9086768	9086829	7	8.9	92	110	0.681905	GAGAGAC	62.3			.		.		0	plus/minus 1kb	AT4G16040.1	1	1	.
75658	4	9271960	9271979	9271938	9271957	3	6.7	100	40	0.303382	AAG	20.1			.		.		0	DHS	AT4G16440.1	1	1	DHS
75659	4	9273959	9273984	9273937	9273962	3	9	91	47	0.581349	AGA	27			.		.		0	DHS	AT4G16444.1	1	1	DHS
75675	4	9286374	9286427	9286352	9286405	2	27	100	108	0.810782	AT	54			AT4G16460.1	1	AT4G16460.1	1	2	intron	AT4G16460.1	1	3	.
75717	4	9362652	9362700	9362630	9362678	2	24.5	100	98	0.825576	GA	49			AT4G16630.1	1	AT4G16630.1	1	2	intron	AT4G16630.1	1	3	.
75722	4	9366104	9366135	9366082	9366113	3	10.7	93	57	0.846978	TCT	32.1			AT4G16630.1	1	.		1	exon	AT4G16630.1	1	2	.
75785	4	9452492	9452519	9452473	9452500	3	9.3	92	49	0.646654	TGA	27.9			AT4G16790.1	1	.		1	exon	AT4G16790.1	1	2	.
75863	4	9537641	9537664	9537622	9537645	3	8	100	48	0.573207	AGA	24			AT4G16940.1	1	AT4G16940.1	1	2	intron	AT4G16940.1	1	3	.
75878	4	9560654	9560675	9560635	9560656	2	11	100	44	0.954678	TA	22			AT4G16990.1	1	AT4G16990.1	1	2	intron	AT4G16990.1	1	3	.
75948	4	9720076	9720103	9720064	9720091	2	14	92	49	1.04094	TC	28			AT4G17410.1	1	AT4G17410.1	1	2	intron	AT4G17410.1	1	3	.
75999	4	9774465	9774484	9774452	9774471	2	10	100	40	0.855577	AT	20			AT4G17530.1	1	AT4G17530.1	1	2	intron	AT4G17530.1	1	3	.
76000	4	9775396	9775415	9775383	9775402	3	6.7	100	40	0.303382	AGA	20.1			AT4G17530.1	1	AT4G17530.1	1	2	intron	AT4G17540.1	1	3	.
76041	4	9827548	9827568	9827535	9827555	2	10.5	100	42	0.908802	TC	21			.		.		0	DHS	AT4G17640.1	1	1	DHS
76068	4	9849718	9849766	9849705	9849753	2	24.5	100	98	0.825576	TA	49			AT4G17695.1	1	AT4G17695.1	1	2	intron	AT4G17695.1	1	3	.
76075	4	9860955	9860988	9860942	9860975	2	17.5	93	63	1.07374	AT	35			.		.		0	plus/minus 1kb	AT4G17713.1	1	1	.
76081	4	9870047	9870110	9870034	9870097	3	21.7	96	123	0.955203	TTG	65.1	CD_204_TTG_hsfa1a		AT4G17750.1	1	.		1	exon	AT4G17740.1	1	2	.
76176	4	9966731	9966751	9966719	9966739	3	7	100	42	0.37134	GAA	21			AT4G17940.1	1	.		1	exon	AT4G17950.1	1	2	.
76178	4	9968567	9968591	9968555	9968579	3	8.3	100	50	0.6266	ACC	24.9			AT4G17950.1	1	.		1	exon	AT4G17950.1	1	2	.
76181	4	9969164	9969243	9969152	9969231	2	40	97	153	1.59598	CT	80			.		.		0	DHS	AT4G17950.1	1	1	DHS
76185	4	9975452	9975472	9975440	9975460	2	10.5	100	42	0.908802	GA	21			.		.		0	plus/minus 1kb	AT4G17970.1	1	1	.
76199	4	9985403	9985426	9985391	9985414	2	12	100	48	1.02588	AT	24			AT4G17990.1	1	AT4G17990.1	1	2	intron	AT4G17990.1	1	3	.
76218	4	10002780	10002830	10002768	10002818	2	25.5	100	102	0.812059	AT	51			.		.		0	DHS	AT4G18020.1	1	1	DHS
76237	4	10031676	10031708	10031664	10031696	3	11	93	45	0.878982	AGC	33			AT4G18070.1	1	.		1	exon	AT4G18070.1	1	2	.
76244	4	10045994	10046013	10045982	10046001	3	6.7	100	40	0.303382	AGA	20.1			.		.		0	plus/minus 1kb	AT4G18130.1	1	1	.
76248	4	10053655	10053677	10053644	10053666	3	7.7	100	46	0.516554	CAA	23.1			AT4G18150.1	1	.		1	exon	AT4G18150.1	1	2	.
76253	4	10055516	10055537	10055505	10055526	2	11	100	44	0.954678	GA	22			.		.		0	DHS	AT4G18160.1	1	1	DHS
76299	4	10149223	10149243	10149212	10149232	3	7	100	42	0.37134	AAG	21			.		.		0	DHS	AT4G18360.1	1	1	DHS
76362	4	10231302	10231326	10231291	10231315	2	12.5	91	43	0.949864	CT	25			.		.		0	DHS	AT4G18570.1	1	1	DHS
76363	4	10231534	10231559	10231523	10231548	3	8.7	91	45	0.530293	CCT	26.1			AT4G18570.1	1	.		1	exon	AT4G18570.1	1	2	.
76433	4	10290790	10290813	10290779	10290802	3	7.7	90	41	0.31861	AGA	23.1			.		.		0	plus/minus 1kb	AT4G18700.1	1	1	.
76474	4	10343475	10343508	10343464	10343497	3	11.3	93	47	0.908504	TTG	33.9			.		.		0		.			.
76495	4	10366295	10366314	10366284	10366303	3	6.7	100	40	0.303382	AAC	20.1			AT4G18910.1	1	.		1	exon	AT4G18910.1	1	2	.
76533	4	10417321	10417349	10417310	10417338	2	14.5	92	51	1.05688	TC	29			AT4G19020.1	1	AT4G19020.1	1	2	intron	AT4G19020.1	1	3	.
76560	4	10472643	10472667	10472632	10472656	3	8.3	90	43	0.438104	CTC	24.9			AT4G19150.1	1	.		1	exon	AT4G19150.1	1	2	.
76671	4	10584557	10584584	10584546	10584573	2	14	100	56	1.09696	AT	28			AT4G19410.1	1	AT4G19410.1	1	2	intron/DHS	AT4G19410.1	1	3	DHS
76688	4	10606894	10606915	10606883	10606904	2	11	100	44	0.954678	AT	22			AT4G19450.1	1	AT4G19450.1	1	2	intron	AT4G19450.1	1	3	.
76689	4	10609396	10609435	10609385	10609424	3	13.3	100	80	1.10262	CTT	39.9			.		.		0	plus/minus 1kb	AT4G19450.1	1	1	.
76726	4	10644410	10644437	10644400	10644427	2	14	100	56	1.09696	AT	28			AT4G19520.1	1	AT4G19520.1	1	2	intron	AT4G19520.1	1	3	.
76738	4	10659553	10659579	10659543	10659569	3	9	91	47	0.581349	TTC	27			AT4G19550.1	1	.		1	exon	AT4G19550.1	1	2	.
76768	4	10701989	10702010	10701979	10702000	3	7.3	100	44	0.435838	AGA	21.9			.		.		0	DHS	AT4G19670.1	1	1	DHS
76807	4	10745372	10745404	10745362	10745394	5	6.2	92	52	0.0639212	AAGAA	31			.		.		0	plus/minus 1kb	AT4G19750.1	1	1	.
76844	4	10773810	10773834	10773800	10773824	3	8.3	100	50	0.6266	GAT	24.9	HS_374_GAT_unk		AT4G19830.1	1	.		1	exon/DHS	AT4G19830.1	1	2	DHS	1
76845	4	10783909	10783932	10783899	10783922	3	8	90	41	0.379879	TCT	24			AT4G19870.1	1	.		1	exon	AT4G19870.1	1	2	.
76924	4	10893904	10893924	10893894	10893914	3	7	100	42	0.37134	GAA	21			AT4G20160.1	1	.		1	exon	AT4G20160.1	1	2	.
76968	4	10925285	10925320	10925275	10925310	3	12	100	72	1.04471	CAT	36			AT4G20230.1	1	AT4G20230.1	1	2	intron	AT4G20230.1	1	3	.
76992	4	10955473	10955498	10955463	10955488	3	8.3	95	45	0.526017	CTT	24.9			AT4G20290.1	1	.		1	exon/DHS	AT4G20280.1	1	2	DHS
77096	4	11135092	11135115	11135081	11135104	3	8.3	90	43	0.438104	AAC	24.9			AT4G20790.1	1	AT4G20790.1	1	2	intron	AT4G20790.1	1	3	.
77133	4	11176728	11176747	11176717	11176736	2	10	100	40	0.855577	CT	20			.		.		0	DHS	AT4G20870.1	1	1	DHS
77204	4	11288898	11288940	11288888	11288930	3	14.3	100	86	1.12285	CTT	42.9		3' UTR, AT4G21180	.		.		0	DHS	AT4G21180.1	1	1	DHS
77206	4	11293794	11293827	11293784	11293817	3	11.3	100	68	0.996479	AGA	33.9	IN_524_AGA_emb1417		.		AT4G21190.1	1	1	intron	AT4G21190.1	1	2	.
77241	4	11340470	11340489	11340460	11340479	3	6.7	100	40	0.303382	AGA	20.1			.		.		0	DHS	AT4G21310.1	1	1	DHS
77261	4	11368480	11368501	11368469	11368490	3	7.3	100	44	0.435838	AAG	21.9	NC_884_AAG		.		.		0		.			.
77352	4	11440543	11440599	11440531	11440587	2	29	92	102	0.86744	AT	58			.		.		0	plus/minus 1kb	AT4G21500.1	1	1	.
77364	4	11470200	11470222	11470188	11470210	2	12	90	41	0.895204	GA	24			.		.		0	DHS	AT4G21570.1	1	1	DHS
77386	4	11503265	11503289	11503253	11503277	2	13	91	45	0.982079	AT	26			AT4G21650.1	1	AT4G21650.1	1	2	intron	AT4G21650.1	1	3	.
77418	4	11577023	11577060	11577011	11577048	6	6.3	100	76	0.240418	TCACAA	37.8			.		.		0	plus/minus 1kb	AT4G21810.1	1	1	.
77437	4	11605067	11605091	11605055	11605079	3	8.3	90	43	0.438104	TTC	24.9			.		.		0	DHS	AT4G21870.1	1	1	DHS
77466	4	11654327	11654352	11654315	11654340	3	8.7	100	52	0.692832	TTG	26.1			.		.		0	DHS	AT4G21970.1	1	1	DHS
77555	4	11777624	11777656	11777612	11777644	5	6.6	100	66	0.301542	AAACA	33			.		AT4G22280.1	1	1	intron	AT4G22280.1	1	2	.
77672	4	11890641	11890666	11890630	11890655	3	8.7	100	52	0.692832	GAA	26.1			AT4G22580.1	1	.		1	exon/DHS	AT4G22580.1	1	2	DHS
77777	4	12028296	12028317	12028285	12028306	2	11	100	44	0.954678	AT	22			.		.		0	DHS	AT4G22950.1	1	1	DHS
77834	4	12122165	12122201	12122154	12122190	3	12.3	94	67	0.999768	CAC	36.9			AT4G23140.1	1	.		1	exon/DHS	AT4G23140.1	1	2	DHS
77842	4	12138956	12138975	12138945	12138964	3	6.7	100	40	0.303382	CCA	20.1			AT4G23180.1	1	.		1	exon	AT4G23180.1	1	2	.
77893	4	12273414	12273465	12273404	12273455	2	26	100	104	0.808972	AT	52			.		.		0	DHS	AT4G23515.1	1	1	DHS
77933	4	12336378	12336401	12336368	12336391	3	8	100	48	0.573207	TGA	24			.		.		0	plus/minus 1kb	AT4G23680.1	1	1	.
77937	4	12340015	12340035	12340005	12340025	2	10.5	100	42	0.908802	AT	21			.		.		0	DHS	AT4G23690.1	1	1	DHS
78024	4	12480395	12480420	12480385	12480410	4	6.5	95	45	0.156877	TTGA	26			AT4G24020.1	1	AT4G24020.1	1	2	intron	AT4G24020.1	1	3	.
78037	4	12486578	12486603	12486568	12486593	3	8.7	100	52	0.692832	GAC	26.1			AT4G24030.1	1	.		1	exon	AT4G24030.1	1	2	.
78045	4	12503761	12503785	12503751	12503775	2	12.5	100	50	1.05197	TC	25			.		.		0	DHS	AT4G24060.1	1	1	DHS
78123	4	12661641	12661661	12661631	12661651	2	10.5	100	42	0.908802	TG	21			AT4G24510.1	1	AT4G24510.1	1	2	intron	AT4G24510.1	1	3	.
78192	4	12777632	12777655	12777622	12777645	2	12	90	41	0.895204	CT	24			.		.		0	DHS	AT4G24790.1	1	1	DHS
78193	4	12777841	12777867	12777831	12777857	3	9	100	54	0.738874	CTT	27			.		.		0	plus/minus 1kb	AT4G24790.1	1	1	.
78280	4	12906630	12906654	12906620	12906644	3	8.3	90	43	0.438104	GGA	24.9			AT4G25160.1	1	.		1	exon	AT4G25160.1	1	2	.
78398	4	13095472	13095494	13095463	13095485	4	5.8	100	46	0.0870131	TTAG	23.2			AT4G25700.1	1	AT4G25700.1	1	2	intron	AT4G25700.1	1	3	.
78490	4	13236461	13236483	13236452	13236474	3	7.7	100	46	0.516554	CCA	23.1			AT4G26120.1	1	.		1	exon	AT4G26110.1	1	2	.
78506	4	13253314	13253340	13253305	13253331	3	9	100	54	0.738874	ACA	27			AT4G26150.1	1	.		1	exon	AT4G26150.1	1	2	.
78534	4	13307765	13307798	13307756	13307789	3	11.3	100	68	0.996479	CTT	33.9			AT4G26290.1	1	.		1	exon	AT4G26290.1	1	2	.
78569	4	13372308	13372332	13372300	13372324	3	8	91	43	0.399598	AGA	24			AT4G26470.1	1	.		1	exon	AT4G26470.1	1	2	.
78651	4	13528806	13528825	13528800	13528819	3	6.7	100	40	0.303382	ACA	20.1			AT4G26930.1	1	.		1	exon	AT4G26930.1	1	2	.
78652	4	13529783	13529817	13529777	13529811	4	8.8	96	63	0.649014	ATAC	35.2			.		.		0	plus/minus 1kb	AT4G26930.1	1	1	.
78748	4	13736304	13736387	13736298	13736381	2	42.5	92	149	1.42028	TC	85			AT4G27470.1	1	.		1	exon	AT4G27470.1	1	2	.
78815	4	13883202	13883229	13883196	13883223	2	14	100	56	1.09696	TC	28			.		.		0	DHS	AT4G27870.1	1	1	DHS
78861	4	13945917	13945940	13945911	13945934	3	8	100	48	0.573207	TTC	24			.		.		0	DHS	AT4G28070.1	1	1	DHS
78892	4	13999007	13999037	13999001	13999031	5	6.2	96	55	0.115266	TTTTA	31			.		.		0	DHS	AT4G28240.1	1	1	DHS
78919	4	14033746	14033769	14033740	14033763	2	12	90	41	0.895204	GT	24			.		.		0	DHS	AT4G28365.1	1	1	DHS
78922	4	14042820	14042848	14042814	14042842	5	5.8	100	58	0.0979872	AAAAC	29			.		AT4G28390.1	1	1	intron	AT4G28390.1	1	2	.
78939	4	14074261	14074286	14074255	14074280	3	8.7	91	45	0.530293	CAT	26.1			AT4G28480.1	1	AT4G28480.2	1	2	intron	AT4G28480.1	1	3	.
78955	4	14093628	14093651	14093622	14093645	2	12	90	41	0.895204	AT	24			AT4G28530.1	1	AT4G28530.1	1	2	intron	AT4G28530.1	1	3	.
78980	4	14142461	14142488	14142455	14142482	3	9.3	92	42	0.646654	TTC	27.9			AT4G28640.1	1	.		1	exon	AT4G28640.1	1	2	.
79017	4	14199132	14199152	14199126	14199146	3	7	100	42	0.37134	AAG	21			.		.		0	DHS	AT4G28730.1	1	1	DHS
79025	4	14207768	14207792	14207762	14207786	2	12.5	100	50	1.05197	TC	25			.		AT4G28760.1	1	1	intron	AT4G28760.1	1	2	.
79059	4	14269181	14269205	14269175	14269199	3	8.3	100	50	0.6266	ACA	24.9			AT4G28920.1	1	AT4G28920.1	1	2	intron	AT4G28920.1	1	3	.
79080	4	14281035	14281058	14281029	14281052	3	8	100	48	0.573207	GAT	24			.		.		0		.			.
79102	4	14293633	14293675	14293627	14293669	3	14.3	90	72	1.06134	CTT	42.9			.		.		0	DHS	AT4G28990.1	1	1	DHS
79125	4	14311387	14311406	14311381	14311400	3	6.7	100	40	0.303382	AAG	20.1			.		.		0	plus/minus 1kb	AT4G29040.1	1	1	.
79162	4	14341360	14341384	14341354	14341378	3	8.3	90	43	0.438104	CTT	24.9			AT4G29100.1	1	.		1	exon	AT4G29100.1	1	2	.
79202	4	14388263	14388286	14388257	14388280	3	8	90	41	0.379879	ATC	24			AT4G29180.1	1	.		1	exon	AT4G29180.1	1	2	.
79239	4	14417214	14417245	14417208	14417239	3	11.3	90	47	0.866239	AGA	33.9			.		.		0		.			.
79241	4	14418701	14418727	14418695	14418721	2	13.5	100	54	1.08711	CT	27			.		.		0	DHS	AT4G29240.1	1	1	DHS
79259	4	14446857	14446881	14446851	14446875	3	8.3	90	43	0.438104	GGA	24.9			AT4G29330.1	1	.		1	exon	AT4G29330.1	1	2	.
79266	4	14452193	14452213	14452187	14452207	3	7	100	42	0.37134	TCC	21			AT4G29360.2	1	.		1	exon	AT4G29360.2	1	2	.
79280	4	14471647	14471683	14471641	14471677	3	13	94	64	1.04088	ATC	39			AT4G29420.1	1	AT4G29420.1	1	2	intron	AT4G29420.1	1	3	.
79318	4	14555566	14555588	14555560	14555582	2	11.5	100	46	0.993576	TA	23			.		.		0	DHS	AT4G29720.1	1	1	DHS
79319	4	14558588	14558644	14558582	14558638	2	28.5	100	114	0.834841	AG	57			.		.		0	DHS	AT4G29730.1	1	1	DHS
79322	4	14565384	14565407	14565378	14565401	2	12	100	48	1.02588	AT	24			.		.		0	plus/minus 1kb	AT4G29740.2	1	1	.
79343	4	14619132	14619161	14619126	14619155	3	10	100	60	0.870827	GAA	30			.		.		0	plus/minus 1kb	AT4G29900.1	1	1	.
79427	4	14740949	14740996	14740943	14740990	2	24.5	95	91	0.869893	TA	49			.		.		0	DHS	AT4G30140.1	1	1	DHS
79445	4	14763496	14763541	14763490	14763535	2	23	100	92	0.861734	AT	46			AT4G30170.1	1	AT4G30170.1	1	2	intron/DHS	AT4G30170.1	1	3	DHS
79476	4	14793826	14793853	14793820	14793847	3	9.3	92	49	0.646654	TTG	27.9			.		.		0		.			.
79482	4	14798071	14798098	14798065	14798092	4	7	95	49	0.277542	TTTC	28			AT4G30210.1	1	AT4G30210.1	1	2	intron	AT4G30210.1	1	3
79485	4	14801602	14801621	14801596	14801615	3	6.7	100	40	0.303382	CAA	20.1	HS_384_CAA_ar2		.		.		0	DHS/non gene	.			DHS	1	1	HS
79502	4	14814957	14814978	14814951	14814972	3	7.3	100	44	0.435838	TAT	21.9	NC_894_TAT		.		.		0		.			.
79554	4	14917491	14917520	14917485	14917514	3	10	92	53	0.747237	GAA	30			.		.		0		.			.
79559	4	14924038	14924061	14924032	14924055	2	12	100	48	1.02588	AT	24			AT4G30540.1	1	AT4G30540.1	1	2	intron	AT4G30540.1	1	3	.
79567	4	14939539	14939567	14939533	14939561	2	14.5	100	58	1.1022	TA	29			AT4G30600.1	1	AT4G30600.1	1	2	intron	AT4G30600.1	1	3	.
79598	4	14984259	14984316	14984253	14984310	2	28.5	96	109	0.840383	AT	57			.		.		0	plus/minus 1kb	AT4G30760.1	1	1	.
79603	4	14992680	14992709	14992674	14992703	3	10	100	60	0.870827	ACA	30			AT4G30780.1	1	.		1	exon	AT4G30790.1	1	2	.
79636	4	15045328	15045356	15045322	15045350	2	14	92	51	1.04094	AT	28			.		.		0	DHS	AT4G30910.1	1	1	DHS
79657	4	15075055	15075077	15075049	15075071	2	11.5	100	46	0.993576	CT	23			.		.		0	plus/minus 1kb	AT4G30970.1	1	1	.
79660	4	15080440	15080459	15080434	15080453	2	10	100	40	0.855577	GA	20			AT4G30980.1	1	AT4G30980.1	1	2	intron/DHS	AT4G30980.1	1	3	DHS
79676	4	15129731	15129764	15129725	15129758	3	11.3	93	54	0.908504	GAA	33.9			AT4G31110.1	1	.		1	exon	AT4G31110.1	1	2	.
79724	4	15212534	15212563	15212528	15212557	2	15	100	60	1.10325	AG	30			AT4G31350.1	1	AT4G31350.1	1	2	intron/DHS	AT4G31350.1	1	3	DHS
79782	4	15297190	15297221	15297184	15297215	2	16.5	93	59	1.08306	GA	33			AT4G31570.1	1	AT4G31570.1	1	2	intron	AT4G31570.1	1	3	.
79803	4	15324552	15324578	15324546	15324572	2	13.5	92	47	1.02035	GA	27			AT4G31620.1	1	AT4G31620.1	1	2	intron	AT4G31630.1	1	3	.
79812	4	15336259	15336316	15336253	15336310	6	9.7	92	102	0.782355	TGATGG	58.2			AT4G31670.1	1	.		1	exon	AT4G31670.1	1	2	.
79815	4	15347920	15347944	15347914	15347938	2	12.5	91	43	0.949864	AT	25			.		.		0	DHS	AT4G31700.1	1	1	DHS
79829	4	15367562	15367589	15367556	15367583	3	9	92	49	0.598838	AGA	27			.		.		0	plus/minus 1kb	AT4G31750.1	1	1	.
79835	4	15394256	15394284	15394250	15394278	3	10	92	53	0.747237	TCT	30			.		.		0	plus/minus 1kb	AT4G31820.1	1	1
79841	4	15409272	15409301	15409266	15409295	2	15	100	60	1.10325	AT	30			.		.		0	DHS	AT4G31860.2	1	1	DHS
79884	4	15464873	15464911	15464867	15464905	2	19.5	100	78	0.989118	AG	39			.		.		0	plus/minus 1kb	AT4G31970.1	1	1	.
79887	4	15476626	15476651	15476620	15476645	3	8.7	91	45	0.530293	AAG	26.1			AT4G32000.1	1	.		1	exon	AT4G32000.1	1	2	.
79914	4	15527769	15527793	15527763	15527787	2	12.5	100	50	1.05197	AG	25			.		.		0	DHS	AT4G32150.1	1	1	DHS
79934	4	15574797	15574839	15574791	15574833	6	7.2	91	72	0.324865	CAAACG	43.2			.		.		0	plus/minus 1kb	AT4G32260.1	1	1		1	2	HS/5'3'	id-778736
79944	4	15592924	15592943	15592918	15592937	2	10	100	40	0.855577	TC	20			.		.		0	DHS	AT4G32295.1	1	1	DHS
79963	4	15617444	15617463	15617438	15617457	3	6.7	100	40	0.303382	CAC	20.1			.		.		0	DHS	AT4G32350.1	1	1	DHS
79973	4	15630915	15630935	15630909	15630929	2	10.5	100	42	0.908802	AT	21			AT4G32375.1	1	AT4G32375.1	1	2	intron	AT4G32375.1	1	3	.
79978	4	15633874	15633908	15633868	15633902	2	17.5	100	70	1.05953	AT	35			AT4G32380.1	1	AT4G32380.1	1	2	intron	AT4G32380.1	1	3	.
79999	4	15676460	15676479	15676454	15676473	2	10	100	40	0.855577	TC	20			.		.		0	DHS	AT4G32480.1	1	1	DHS
80005	4	15692450	15692491	15692444	15692485	2	21	100	84	0.930793	AT	42			.		AT4G32520.1	1	1	intron	AT4G32520.1	1	2	.
80006	4	15694966	15695015	15694960	15695009	2	25	91	79	0.906699	CT	50			.		.		0	plus/minus 1kb	AT4G32530.1	1	1	.
80032	4	15717978	15718011	15717972	15718005	2	17	93	61	1.07967	AG	34			AT4G32570.1	1	AT4G32570.1	1	2	intron/DHS	AT4G32570.1	1	3	DHS
80050	4	15765467	15765491	15765462	15765486	2	12.5	91	43	0.949864	AG	25			.		.		0	DHS	AT4G32680.1	1	1	DHS
80052	4	15769844	15769905	15769839	15769900	4	15.5	96	117	1.12863	ATAG	62			AT4G32700.2	1	AT4G32700.2	1	2	intron/DHS	AT4G32700.2	1	3	DHS
80064	4	15790346	15790369	15790341	15790364	2	12	100	48	1.02588	TC	24			.		.		0	DHS	AT4G32720.1	1	1	DHS
80065	4	15790413	15790479	15790408	15790474	2	33.5	94	122	0.989925	CT	67			.		.		0	DHS	AT4G32720.1	1	1	DHS
80075	4	15819542	15819569	15819538	15819565	2	14	100	56	1.09696	AG	28			.		.		0	DHS	AT4G32800.1	1	1	DHS
80117	4	15875882	15875901	15875878	15875897	3	6.7	100	40	0.303382	TTC	20.1			AT4G32890.1	1	AT4G32890.1	1	2	intron	AT4G32890.1	1	3	.
80128	4	15916852	15916872	15916849	15916869	3	7	100	42	0.37134	TGT	21			AT4G32980.1	1	.		1	exon	AT4G32980.1	1	2	.
80140	4	15925125	15925144	15925122	15925141	2	10	100	40	0.855577	CT	20			AT4G33000.1	1	AT4G33000.1	1	2	intron	AT4G33000.1	1	3	.
80152	4	15960104	15960149	15960101	15960146	2	23	100	92	0.861734	GA	46			.		.		0	DHS	AT4G33080.1	1	1	DHS
80162	4	15981829	15981849	15981826	15981846	3	7	100	42	0.37134	ACA	21			AT4G33140.1	1	.		1	exon	AT4G33140.1	1	2	.
80170	4	15994136	15994159	15994133	15994156	2	12.5	91	43	0.949864	TC	25			.		.		0	plus/minus 1kb	AT4G33160.1	1	1	.
80175	4	16000873	16000901	16000870	16000898	2	14.5	100	58	1.1022	TA	29			AT4G33180.1	1	AT4G33180.1	1	2	intron	AT4G33180.1	1	3	.
80226	4	16111147	16111167	16111144	16111164	3	7	100	42	0.37134	TCA	21			.		.		0	plus/minus 1kb	AT4G33490.1	1	1	.
80274	4	16206124	16206145	16206122	16206143	2	11	100	44	0.954678	TA	22			AT4G33790.1	1	AT4G33790.1	1	2	intron/DHS	AT4G33790.1	1	3	DHS
80312	4	16278151	16278173	16278146	16278168	2	11.5	100	46	0.993576	AT	23			.		.		0	DHS	AT4G33960.1	1	1	DHS
80325	4	16283237	16283261	16283232	16283256	3	8.7	91	45	0.530293	CTT	26.1			AT4G33980.1	1	.		1	exon	AT4G33980.1	1	2	.
80386	4	16422183	16422203	16422179	16422199	3	7	100	42	0.37134	TGT	21			.		.		0	plus/minus 1kb	AT4G34320.1	1	1	.
80396	4	16441952	16441972	16441948	16441968	3	7	100	42	0.37134	TCA	21			AT4G34390.1	1	.		1	exon	AT4G34390.1	1	2	.
80397	4	16444204	16444245	16444200	16444241	2	21	100	84	0.930793	CT	42			AT4G34390.1	1	AT4G34390.1	1	2	intron	AT4G34390.1	1	3	.
80424	4	16481286	16481321	16481282	16481317	3	12	100	72	1.04471	TCC	36			.		.		0	plus/minus 1kb	AT4G34470.1	1	1	.
80450	4	16522789	16522811	16522784	16522806	3	7.7	100	46	0.516554	CAA	23.1			AT4G34590.1	1	.		1	exon/DHS	AT4G34590.1	1	2	DHS
80467	4	16534321	16534347	16534316	16534342	2	13.5	92	47	1.02035	AG	27			.		.		0	DHS	AT4G34620.1	1	1	DHS
80580	4	16724142	16724165	16724137	16724160	3	8	90	41	0.379879	ATC	24			AT4G35140.1	1	AT4G35140.1	1	2	intron	AT4G35130.1	1	3	.
80659	4	16816694	16816722	16816689	16816717	2	14.5	100	58	1.1022	TA	29			AT4G35370.1	1	AT4G35370.1	1	2	intron	AT4G35370.1	1	3	.
80663	4	16826641	16826662	16826636	16826657	3	7.3	100	44	0.435838	TCT	21.9			.		.		0	plus/minus 1kb	AT4G35380.1	1	1	.
80770	4	16978573	16978597	16978569	16978593	2	12.5	100	50	1.05197	AT	25			.		.		0	DHS	AT4G35830.1	1	1	DHS
80842	4	17145853	17145899	17145850	17145896	3	15.7	90	52	1.093	GGA	47.1			.		.		0		.			.
80854	4	17148979	17149006	17148976	17149003	2	14	100	56	1.09696	AT	28			.		.		0	DHS	AT4G36240.1	1	1	DHS
80865	4	17164836	17164858	17164833	17164855	2	11.5	100	46	0.993576	TG	23			AT4G36270.1	1	AT4G36270.1	1	2	intron	AT4G36270.1	1	3	.
80877	4	17189042	17189071	17189039	17189068	2	15	100	60	1.10325	TA	30			AT4G36380.1	1	AT4G36380.1	1	2	intron/DHS	AT4G36380.1	1	3	DHS
80878	4	17190736	17190760	17190733	17190757	2	12.5	100	50	1.05197	TA	25			AT4G36380.1	1	AT4G36380.1	1	2	intron	AT4G36380.1	1	3	.
80884	4	17200771	17200790	17200768	17200787	3	6.7	100	40	0.303382	TTG	20.1			.		.		0	DHS	AT4G36400.1	1	1	DHS
80924	4	17261764	17261824	17261759	17261819	2	30.5	100	122	0.908784	AT	61			AT4G36590.1	1	AT4G36590.1	1	2	intron	AT4G36590.1	1	3	.
80940	4	17279089	17279114	17279084	17279109	4	6.5	100	52	0.266031	TCTT	26			.		.		0	DHS	AT4G36640.1	1	1	DHS
80985	4	17334185	17334208	17334180	17334203	3	8	100	48	0.573207	TCC	24			AT4G36780.1	1	.		1	exon/DHS	AT4G36780.1	1	2	DHS
80997	4	17345279	17345304	17345275	17345300	2	13	100	52	1.07224	AT	26			.		.		0	DHS	AT4G36810.1	1	1	DHS
81021	4	17369498	17369522	17369499	17369523	3	8.3	90	43	0.438104	ATC	24.9			AT4G36870.1	1	.		1	exon	AT4G36870.1	1	2	.
81081	4	17437242	17437262	17437248	17437268	2	10.5	100	42	0.908802	TG	21			.		.		0	DHS	AT4G36980.1	1	1	DHS
81155	4	17510902	17510921	17510908	17510927	3	6.7	100	40	0.303382	GAA	20.1			AT4G37200.1	1	.		1	exon	AT4G37200.1	1	2	.
81181	4	17549179	17549202	17549185	17549208	2	12	90	41	0.895204	AG	24			AT4G37280.1	1	AT4G37280.1	1	2	intron	AT4G37290.1	1	3	.
81206	4	17587546	17587577	17587552	17587583	3	10.7	100	64	0.944588	AAT	32.1	NC_904_AAT		.		.		0		.			.
81231	4	17611319	17611356	17611325	17611362	2	19	100	76	1.00819	AG	38			AT4G37460.1	1	AT4G37460.1	1	2	intron	AT4G37460.1	1	3	.
81277	4	17686382	17686404	17686388	17686410	4	5.8	100	46	0.0870131	AAAC	23.2			AT4G37640.1	1	AT4G37640.1	1	2	intron	AT4G37640.1	1	3	.
81412	4	17845697	17845724	17845703	17845730	2	14	100	56	1.09696	AT	28			AT4G37950.1	1	AT4G37950.1	1	2	intron	AT4G37950.1	1	3	.
81421	4	17857905	17857935	17857911	17857941	2	15.5	100	62	1.10049	TC	31			.		.		0	plus/minus 1kb	AT4G37990.1	1	1	.
81450	4	17933253	17933272	17933259	17933278	3	6.7	100	40	0.303382	AAG	20.1			AT4G38240.1	1	AT4G38240.1	1	2	intron	AT4G38240.1	1	3	.
81457	4	17956302	17956321	17956308	17956327	3	6.7	100	40	0.303382	TCT	20.1			AT4G38340.1	1	.		1	exon	AT4G38340.1	1	2	.
81458	4	17957040	17957063	17957046	17957069	3	8	90	41	0.379879	ATG	24			AT4G38340.1	1	AT4G38340.1	1	2	intron	AT4G38340.1	1	3	.
81499	4	18053320	18053341	18053326	18053347	2	11	100	44	0.954678	AT	22			.		.		0	DHS	AT4G38620.1	1	1	DHS
81521	4	18096190	18096245	18096196	18096251	2	28	100	112	0.823882	GA	56			.		.		0	plus/minus 1kb	AT4G38770.1	1	1	.
81532	4	18119184	18119203	18119190	18119209	2	10	100	40	0.855577	AT	20			.		.		0	DHS	AT4G38810.2	1	1	DHS
81537	4	18131503	18131529	18131509	18131535	2	14	92	49	1.04094	TA	28			.		.		0	DHS	AT4G38860.1	1	1	DHS
81538	4	18133454	18133474	18133460	18133480	3	7	100	42	0.37134	GAT	21			AT4G38870.1	1	.		1	exon	AT4G38870.1	1	2	.
81543	4	18149218	18149238	18149224	18149244	2	10.5	100	42	0.908802	TA	21			.		.		0	DHS	AT4G38930.1	1	1	DHS
81550	4	18158881	18158901	18158887	18158907	3	7	100	42	0.37134	GAA	21			.		AT4G38950.1	1	1	intron/DHS	AT4G38950.1	1	2	DHS
81559	4	18175256	18175291	18175262	18175297	2	18	94	65	1.06283	AT	36			.		.		0	DHS	AT4G39010.1	1	1	DHS
81565	4	18179040	18179065	18179046	18179071	3	8.7	91	45	0.530293	GAA	26.1			AT4G39010.1	1	.		1	exon	AT4G39010.1	1	2	.
81586	4	18202557	18202594	18202563	18202600	3	12.3	97	69	1.02738	AAG	36.9			.		.		0	plus/minus 1kb	AT4G39060.1	1	1	.
81607	4	18243649	18243669	18243655	18243675	3	7	100	42	0.37134	AGA	21			.		.		0	plus/minus 1kb	AT4G39180.1	1	1	.
81618	4	18248728	18248765	18248734	18248771	3	12.3	97	69	1.02738	AAG	36.9			.		.		0		.			.
81650	4	18280958	18280981	18280964	18280987	3	7.7	95	41	0.409266	ATT	23.1			.		.		0	plus/minus 1kb	AT4G39280.1	1	1	.
81686	4	18381496	18381528	18381502	18381534	3	11	100	66	0.971797	TCT	33			AT4G39550.1	1	.		1	exon	AT4G39550.1	1	2	.
81689	4	18385072	18385093	18385078	18385099	3	7.3	100	44	0.435838	TCT	21.9			AT4G39570.1	1	.		1	exon	AT4G39570.1	1	2	.
81728	4	18440471	18440490	18440477	18440496	3	6.7	100	40	0.303382	AGA	20.1			AT4G39753.1	1	.		1	exon	AT4G39753.1	1	2	.
81746	4	18464891	18464913	18464897	18464919	2	11.5	100	46	0.993576	GA	23			.		.		0	DHS	AT4G39790.1	1	1	DHS
81761	4	18485505	18485524	18485511	18485530	3	6.7	100	40	0.303382	TCA	20.1			AT4G39840.1	1	.		1	exon/DHS	AT4G39840.1	1	2	DHS
81776	4	18504315	18504339	18504321	18504345	3	8.3	100	50	0.6266	TTG	24.9			.		.		0	DHS	AT4G39880.1	1	1	DHS
81784	4	18530281	18530302	18530287	18530308	2	11	100	44	0.954678	AT	22			.		.		0	DHS	AT4G39955.1	1	1	DHS
81794	4	18542653	18542690	18542659	18542696	2	19	94	69	1.03897	GA	38			.		.		0	DHS	AT4G39980.1	1	1	DHS
81799	4	18548890	18548916	18548896	18548922	3	9.3	92	49	0.646654	CTT	27.9			AT4G40010.1	1	.		1	exon	AT4G40010.1	1	2	.
81826	4	18572965	18573013	18572971	18573019	2	24.5	100	98	0.825576	AG	49			.		.		0	DHS	AT4G40060.1	1	1	DHS
81861	5	44172	44200	44173	44201	3	9.7	100	58	0.834623	GAA	29.1			AT5G01110.1	1	.		1	exon	AT5G01110.1	1	2	.
81888	5	78473	78516	78474	78517	2	21	90	74	1.01153	AT	42			.		.		0	DHS	AT5G01200.1	1	1	DHS
81903	5	107372	107391	107373	107392	3	6.7	100	40	0.303382	ATG	20.1			.		.		0	plus/minus 1kb	AT5G01260.2	1	1	.
81937	5	162806	162837	162807	162838	3	10.7	100	64	0.944588	TCT	32.1	CD_215_TCT_esp4		AT5G01400.1	1	.		1	exon	AT5G01390.1	1	2	.
81997	5	301999	302024	302002	302027	3	8.7	91	45	0.530293	AAG	26.1			.		.		0	plus/minus 1kb	AT5G01780.1	1	1	.
82017	5	333796	333819	333799	333822	3	8	90	41	0.379879	TTC	24			AT5G01850.1	1	AT5G01850.1	1	2	intron	AT5G01850.1	1	3	.
82055	5	364575	364601	364578	364604	3	9	91	47	0.581349	CTT	27			AT5G01940.1	1	.		1	exon	AT5G01950.1	1	2	.
82058	5	375743	375768	375746	375771	3	8.7	91	45	0.530293	AGG	26.1			AT5G01980.1	1	.		1	exon	AT5G01980.1	1	2	.
82088	5	423357	423381	423360	423384	3	8.3	90	43	0.438104	ACA	24.9			.		.		0	plus/minus 1kb	AT5G02140.1	1	1	.
82112	5	472560	472584	472562	472586	4	6.2	100	50	0.191715	AGAA	24.8			.		AT5G02290.2	1	1	intron/DHS	AT5G02290.1	1	2	DHS
82116	5	473220	473246	473222	473248	2	13.5	100	54	1.08711	TA	27			.		.		0	DHS	AT5G02290.1	1	1	DHS
82178	5	577018	577042	577020	577044	3	8.3	90	43	0.438104	TCT	24.9			AT5G02570.1	1	.		1	exon	AT5G02570.1	1	2	.
82265	5	716784	716816	716785	716817	3	11	93	52	0.878982	TGA	33			AT5G03060.1	1	.		1	exon	AT5G03050.1	1	2	.
82296	5	747337	747366	747338	747367	2	15.5	93	55	1.08081	AT	31			AT5G03150.1	1	AT5G03150.1	1	2	intron	AT5G03150.1	1	3	.
82335	5	813205	813225	813206	813226	3	7	100	42	0.37134	TGA	21			.		.		0	DHS	AT5G03340.1	1	1	DHS
82390	5	904562	904589	904563	904590	3	9.3	100	56	0.78188	AAG	27.9			AT5G03570.1	1	.		1	exon	AT5G03570.1	1	2	.
82418	5	949493	949512	949494	949513	3	6.7	100	40	0.303382	GAG	20.1			AT5G03670.1	1	.		1	exon	AT5G03670.1	1	2	.
82426	5	967450	967488	967451	967489	2	19.5	100	78	0.989118	TA	39			.		.		0	DHS	AT5G03700.1	1	1	DHS
82429	5	973274	973296	973275	973297	3	7.7	100	46	0.516554	AAG	23.1			AT5G03720.1	1	AT5G03720.1	1	2	intron	AT5G03720.1	1	3
82430	5	979816	979848	979817	979849	2	16.5	100	66	1.08521	TC	33			.		.		0	DHS	AT5G03730.2	1	1	DHS
82443	5	990523	990546	990524	990547	2	12.5	91	43	0.949864	GT	25			.		.		0	DHS	AT5G03760.1	1	1	DHS
82451	5	1000348	1000379	1000349	1000380	3	10.7	93	57	0.846978	ACT	32.1			AT5G03780.1	1	.		1	exon	AT5G03780.1	1	2	.
82459	5	1006759	1006788	1006760	1006789	2	15.5	93	55	1.08081	TG	31			.		.		0	plus/minus 1kb	AT5G03790.1	1	1	.
82516	5	1060417	1060442	1060418	1060443	3	8.7	91	45	0.530293	AAG	26.1			AT5G03940.1	1	AT5G03940.1	1	2	intron	AT5G03940.1	1	3	.
82624	5	1217464	1217488	1217463	1217487	4	6.2	100	50	0.191715	ACCA	24.8			.		.		0	DHS	AT5G04340.1	1	1	DHS
82673	5	1279815	1279837	1279814	1279836	3	8	90	41	0.379879	TTC	24			.		.		0	DHS	AT5G04490.1	1	1	DHS
82680	5	1286268	1286291	1286267	1286290	3	8	100	48	0.573207	CTT	24			.		.		0	plus/minus 1kb	AT5G04500.1	1	1	.
82748	5	1409652	1409734	1409651	1409733	2	42.5	95	156	1.66006	GA	85			AT5G04850.1	1	AT5G04850.1	1	2	intron	AT5G04853.1	1	3	.
82777	5	1445119	1445144	1445118	1445143	2	13.5	92	47	1.02035	CT	27			.		.		0	DHS	AT5G04930.1	1	1	DHS
82824	5	1507160	1507201	1507159	1507200	2	21	95	77	0.970406	TC	42			.		.		0	DHS	AT5G05100.1	1	1	DHS
82886	5	1641227	1641257	1641226	1641256	3	10.3	100	62	0.904241	CTT	30.9			.		.		0	plus/minus 1kb	AT5G05550.2	1	1	.
82895	5	1668843	1668870	1668842	1668869	3	9	96	49	0.662041	AAT	27			.		.		0	DHS	AT5G05590.2	1	1	DHS
82896	5	1668961	1668987	1668960	1668986	3	9	100	54	0.738874	ACA	27			.		.		0	DHS	AT5G05590.2	1	1	DHS
82921	5	1698662	1698693	1698661	1698692	2	16	93	57	1.08355	CT	32			AT5G05680.1	1	AT5G05680.1	1	2	intron	AT5G05680.1	1	3	.
82950	5	1750301	1750326	1750300	1750325	4	6.5	90	45	0.0792673	TTTC	26			.		.		0		.			.
82959	5	1764650	1764671	1764649	1764670	3	7.3	100	44	0.435838	GAA	21.9	HS_395_GAA_pirl1		.		.		0	DHS	AT5G05850.1	1	1	DHS
83069	5	1949942	1949964	1949941	1949963	3	7.7	100	46	0.516554	GAA	23.1			AT5G06380.1	1	.		1	exon	AT5G06380.1	1	2	.
83070	5	1951031	1951069	1951030	1951068	2	19.5	100	78	0.989118	GA	39			.		.		0	DHS	AT5G06380.1	1	1	DHS
83137	5	2046827	2046847	2046826	2046846	3	7	100	42	0.37134	AGA	21			.		.		0	DHS	AT5G06660.1	1	1	DHS
83142	5	2069425	2069448	2069424	2069447	3	8	90	41	0.379879	TCC	24			AT5G06710.1	1	.		1	exon	AT5G06710.1	1	2	.
83235	5	2194397	2194422	2194396	2194421	2	13	91	45	0.982079	AT	26			AT5G07060.1	1	.		1	exon	AT5G07050.1	1	2	.
83239	5	2200297	2200316	2200296	2200315	2	10	100	40	0.855577	AT	20			.		.		0	DHS	AT5G07080.1	1	1	DHS
83252	5	2222120	2222233	2222119	2222232	3	38	91	195	1.12939	TGA	114		intergenic	.		.		0	plus/minus 1kb	AT5G07170.1	1	1	.
83309	5	2302902	2302925	2302901	2302924	3	8	90	41	0.379879	TTG	24			AT5G07300.1	1	AT5G07300.1	1	2	intron	AT5G07300.1	1	3	.
83323	5	2322100	2322124	2322099	2322123	2	12.5	100	50	1.05197	AT	25			AT5G07350.1	1	AT5G07350.1	1	2	intron	AT5G07350.1	1	3	.
83334	5	2339766	2339792	2339765	2339791	3	9	91	47	0.581349	GAA	27			.		.		0	DHS	AT5G07390.1	1	1	DHS
83458	5	2413947	2413980	2413946	2413979	2	17	93	61	1.07967	TA	34			AT5G07630.1	1	AT5G07630.1	1	2	intron	AT5G07630.1	1	3	.
83487	5	2463177	2463196	2463176	2463195	3	6.7	100	40	0.303382	GGT	20.1			.		.		0		.			.
83492	5	2468318	2468338	2468317	2468337	3	7	100	42	0.37134	CCT	21			AT5G07760.1	1	.		1	exon	AT5G07760.1	1	2	.
83522	5	2508347	2508374	2508346	2508373	3	9.3	92	49	0.646654	AGA	27.9			.		.		0	DHS	AT5G07850.1	1	1	DHS
83527	5	2514570	2514590	2514569	2514589	3	7	100	42	0.37134	AAC	21			AT5G07870.1	1	.		1	exon	AT5G07880.1	1	2	.
83557	5	2571477	2571496	2571476	2571495	3	6.7	100	40	0.303382	GAA	20.1			AT5G08010.1	1	.		1	exon	AT5G08020.1	1	2	.
83595	5	2621909	2621938	2621908	2621937	3	9.7	92	53	0.705979	CAT	29.1			.		.		0	plus/minus 1kb	AT5G08150.1	1	1	.
83637	5	2666022	2666043	2666021	2666042	2	11	100	44	0.954678	GA	22			.		.		0	DHS	AT5G08280.1	1	1	DHS
83643	5	2680761	2680786	2680760	2680785	3	8.7	100	52	0.692832	CTT	26.1			.		.		0	DHS	AT5G08330.1	1	1	DHS
83657	5	2725073	2725142	2725072	2725141	2	36	91	116	1.05344	AT	72			AT5G08440.1	1	AT5G08440.1	1	2	intron	AT5G08440.1	1	3	.
83683	5	2758305	2758324	2758304	2758323	2	10	100	40	0.855577	GA	20			.		.		0	DHS	AT5G08520.1	1	1	DHS
83692	5	2786721	2786756	2786720	2786755	3	12	100	72	1.04471	GAT	36			AT5G08600.1	1	.		1	exon	AT5G08600.1	1	2	.
83706	5	2837523	2837545	2837522	2837544	2	11.5	100	46	0.993576	AT	23			AT5G08710.1	1	AT5G08710.1	1	2	intron	AT5G08710.1	1	3	.
83714	5	2845592	2845642	2845591	2845641	3	16.7	91	88	1.10104	AAC	50.1			.		.		0	plus/minus 1kb	AT5G08720.1	1	1	.
83749	5	2896612	2896634	2896611	2896633	3	7.7	100	46	0.516554	TTA	23.1			.		.		0	plus/minus 1kb	AT5G09340.1	1	1	.
83764	5	2928276	2928303	2928275	2928302	2	14	92	49	1.04094	TC	28			.		.		0	DHS	AT5G09410.1	1	1	DHS
83765	5	2928566	2928596	2928565	2928595	2	15.5	100	62	1.10049	TC	31			AT5G09420.1	1	AT5G09420.1	1	2	intron	AT5G09420.1	1	3	.
83766	5	2933887	2933915	2933886	2933914	4	7.5	96	53	0.404284	GGTC	30			.		.		0	DHS	AT5G09430.1	1	1	DHS
83816	5	2984226	2984246	2984225	2984245	3	7	100	42	0.37134	TTG	21			AT5G09620.1	1	.		1	exon	AT5G09620.1	1	2	.
83946	5	3158037	3158061	3158036	3158060	3	8.3	100	50	0.6266	CAA	24.9			AT5G10100.1	1	.		1	exon	AT5G10100.1	1	2	.
83959	5	3174687	3174707	3174686	3174706	2	10.5	100	42	0.908802	TA	21			AT5G10140.1	1	AT5G10140.1	1	2	intron	AT5G10140.1	1	3	.
83974	5	3196621	3196664	3196620	3196663	2	22	100	88	0.894085	AT	44			AT5G10180.1	1	AT5G10180.1	1	2	intron	AT5G10180.1	1	3	.
83988	5	3226594	3226614	3226593	3226613	3	7	100	42	0.37134	TTG	21	NC_915_TTG		.		.		0		.			.
84022	5	3280771	3280792	3280770	3280791	2	11	100	44	0.954678	CA	22			AT5G10440.1	1	AT5G10440.1	1	2	intron	AT5G10440.1	1	3	.
84043	5	3319683	3319702	3319682	3319701	3	6.7	100	40	0.303382	CAA	20.1			AT5G10510.1	1	.		1	exon	AT5G10520.1	1	2	.
84079	5	3372147	3372197	3372146	3372196	2	25.5	100	102	0.812059	GA	51			.		.		0	plus/minus 1kb	AT5G10660.1	1	1	.
84092	5	3398508	3398528	3398507	3398527	2	10.5	100	42	0.908802	AG	21			.		.		0	DHS	AT5G10750.1	1	1	DHS
84110	5	3433739	3433758	3433738	3433757	3	6.7	100	40	0.303382	AGG	20.1			AT5G10880.1	1	.		1	exon	AT5G10890.1	1	2	.
84113	5	3435272	3435296	3435271	3435295	2	12.5	91	43	0.949864	AG	25			.		.		0	DHS	AT5G10890.1	1	1	DHS
84122	5	3448701	3448722	3448700	3448721	3	7.3	100	44	0.435838	ACA	21.9			.		.		0	plus/minus 1kb	AT5G10940.1	1	1	.
84124	5	3457267	3457286	3457266	3457285	3	6.7	100	40	0.303382	AAG	20.1			.		.		0	DHS	AT5G10946.1	1	1	DHS
84182	5	3565967	3565987	3565966	3565986	3	7	100	42	0.37134	AAG	21			AT5G11190.1	1	.		1	exon	AT5G11190.1	1	2	.
84219	5	3633464	3633514	3633463	3633513	3	16.7	97	95	1.10249	GTT	50.1			.		.		0	DHS	AT5G11380.1	1	1	DHS
84220	5	3633681	3633700	3633680	3633699	3	6.7	100	40	0.303382	CTT	20.1			.		.		0	plus/minus 1kb	AT5G11380.1	1	1	.
84225	5	3648411	3648435	3648410	3648434	2	12.5	100	50	1.05197	TC	25			.		.		0	plus/minus 1kb	AT5G11430.1	1	1	.
84241	5	3687871	3687893	3687870	3687892	3	7.7	100	46	0.516554	CAT	23.1			.		.		0	DHS	AT5G11520.1	1	1	DHS
84271	5	3733849	3733875	3733848	3733874	3	9	91	47	0.581349	ATC	27			AT5G11600.1	1	.		1	exon	AT5G11600.1	1	2	.
84283	5	3749348	3749376	3749347	3749375	2	14.5	92	51	1.05688	TA	29			AT5G11660.1	1	AT5G11660.1	1	2	intron	AT5G11660.1	1	3	.
84303	5	3776222	3776242	3776221	3776241	3	7	100	42	0.37134	CAA	21			AT5G11710.1	1	.		1	exon	AT5G11720.1	1	2	.
84306	5	3787417	3787436	3787416	3787435	3	6.7	100	40	0.303382	CTT	20.1			AT5G11750.1	1	.		1	exon	AT5G11750.1	1	2	.
84315	5	3800525	3800545	3800524	3800544	3	7	100	42	0.37134	TTG	21			AT5G11790.1	1	AT5G11790.1	1	2	intron/DHS	AT5G11790.1	1	3	DHS
84333	5	3845518	3845547	3845517	3845546	3	10	92	53	0.747237	GGA	30			AT5G11930.1	1	.		1	exon	AT5G11930.1	1	2	.
84340	5	3853106	3853141	3853105	3853140	2	18	100	72	1.04375	AT	36			.		.		0	plus/minus 1kb	AT5G11940.1	1	1	.
84356	5	3879418	3879439	3879417	3879438	3	7.3	100	44	0.435838	CTT	21.9			AT5G12010.1	1	.		1	exon	AT5G12010.1	1	2	.
84384	5	3918611	3918636	3918610	3918635	3	8.7	100	52	0.692832	AGA	26.1			.		.		0	DHS	AT5G12130.1	1	1	DHS
84423	5	3973228	3973251	3973227	3973250	2	12.5	91	43	0.949864	AT	25			AT5G12280.1	1	AT5G12280.1	1	2	intron	AT5G12280.1	1	3	.
84432	5	3988500	3988520	3988499	3988519	3	7	100	42	0.37134	TTG	21			AT5G12330.2	1	.		1	exon	AT5G12330.2	1	2	.
84466	5	4050464	4050489	4050461	4050486	3	8.3	95	45	0.526017	TCT	24.9	HS_405_TCT_cpk7		.		.		0	DHS	AT5G12840.1	1	1	DHS
84471	5	4063727	4063776	4063724	4063773	2	25	95	93	0.86013	TA	50			AT5G12870.1	1	AT5G12870.1	1	2	intron	AT5G12870.1	1	3	.
84480	5	4074145	4074225	4074142	4074222	2	41	96	150	1.61598	AG	82			AT5G12900.1	1	AT5G12900.1	1	2	intron	AT5G12900.1	1	3	.
84539	5	4196590	4196613	4196587	4196610	3	8	90	41	0.379879	TCT	24			.		.		0	plus/minus 1kb	AT5G13180.1	1	1	.
84583	5	4254777	4254821	4254774	4254818	2	23	93	78	0.929306	AC	46			.		.		0	DHS	AT5G13290.1	1	1	DHS
84654	5	4404376	4404396	4404373	4404393	2	10.5	100	42	0.908802	TA	21			.		.		0	DHS	AT5G13660.1	1	1	DHS
84682	5	4460928	4460947	4460925	4460944	3	6.7	100	40	0.303382	TCT	20.1			.		.		0	DHS	AT5G13820.1	1	1	DHS
84683	5	4463503	4463523	4463500	4463520	2	10.5	100	42	0.908802	TA	21			AT5G13820.1	1	AT5G13820.1	1	2	intron	AT5G13820.1	1	3
84715	5	4518364	4518390	4518362	4518388	2	13.5	92	47	1.02035	TC	27			AT5G14000.1	1	AT5G14000.1	1	2	intron	AT5G14000.1	1	3	.
84719	5	4525823	4525848	4525821	4525846	2	13	91	45	0.982079	CT	26			.		.		0	plus/minus 1kb	AT5G14020.1	1	1	.
84729	5	4538883	4538903	4538881	4538901	2	10.5	100	42	0.908802	TG	21			AT5G14060.1	1	AT5G14060.1	1	2	intron	AT5G14060.1	1	3	.
84730	5	4539097	4539124	4539095	4539122	3	9.3	100	56	0.78188	TTG	27.9			.		.		0	plus/minus 1kb	AT5G14060.1	1	1	.
84749	5	4573490	4573535	4573488	4573533	2	23	95	85	0.907607	AT	46			AT5G14180.1	1	AT5G14180.1	1	2	intron/DHS	AT5G14180.1	1	3	DHS
84758	5	4610006	4610025	4610003	4610022	3	6.7	100	40	0.303382	TGA	20.1			AT5G14280.1	1	.		1	exon	AT5G14280.1	1	2	.
84760	5	4610631	4610651	4610628	4610648	3	7	100	42	0.37134	TTC	21			AT5G14280.1	1	.		1	exon/DHS	AT5G14280.1	1	2	DHS
84795	5	4642406	4642438	4642403	4642435	3	11	93	59	0.878982	AAT	33			.		.		0		.			.
84844	5	4734003	4734022	4734000	4734019	3	6.7	100	40	0.303382	CTC	20.1			AT5G14690.1	1	.		1	exon	AT5G14680.1	1	2	.
84996	5	4933600	4933639	4933597	4933636	2	20	94	73	1.01031	TA	40			.		.		0	DHS	AT5G15190.1	1	1	DHS
85154	5	5162362	5162387	5162359	5162384	3	8.7	91	45	0.530293	AGA	26.1			AT5G15820.1	1	.		1	exon	AT5G15820.1	1	2	.
85189	5	5229730	5229767	5229727	5229764	3	12.7	94	69	1.02464	CTT	38.1			AT5G16020.1	1	.		1	exon	AT5G16010.1	1	2	.
85230	5	5290661	5290686	5290658	5290683	2	13	91	45	0.982079	AT	26			.		.		0	DHS	AT5G16200.1	1	1	DHS
85241	5	5311416	5311439	5311413	5311436	3	8	100	48	0.573207	CTT	24			AT5G16260.1	1	AT5G16260.1	1	2	intron	AT5G16260.1	1	3	.
85285	5	5385525	5385545	5385522	5385542	2	10.5	100	42	0.908802	TA	21			.		.		0	DHS	AT5G16490.1	1	1	DHS
85306	5	5415707	5415726	5415704	5415723	3	6.7	100	40	0.303382	ATT	20.1			.		.		0		.			.
85347	5	5460057	5460100	5460054	5460097	2	22	100	88	0.894085	AT	44			.		.		0	DHS	AT5G16640.1	1	1	DHS
85355	5	5474509	5474532	5474506	5474529	2	12	90	41	0.895204	TC	24			AT5G16690.1	1	AT5G16690.1	1	2	intron	AT5G16690.1	1	3	.
85380	5	5534680	5534704	5534677	5534701	2	12.5	100	50	1.05197	AC	25			AT5G16830.1	1	AT5G16830.1	1	2	intron	AT5G16830.1	1	3	.
85402	5	5583523	5583558	5583520	5583555	5	7.2	93	58	0.319539	AAAAC	36			AT5G16990.1	1	AT5G16990.1	1	2	intron/DHS	AT5G16990.1	1	3	DHS
85414	5	5606281	5606318	5606278	5606315	2	19	100	76	1.00819	AT	38			AT5G17040.1	1	AT5G17040.1	1	2	intron	AT5G17040.1	1	3	.
85496	5	5711806	5711862	5711804	5711860	2	28.5	96	107	0.840383	TA	57			AT5G17330.1	1	AT5G17330.1	1	2	intron/DHS	AT5G17330.1	1	3	DHS
85613	5	5863899	5863920	5863897	5863918	2	11	100	44	0.954678	AT	22			.		.		0	DHS	AT5G17770.1	1	1	DHS
85675	5	5960739	5960758	5960737	5960756	3	6.7	100	40	0.303382	TTC	20.1			AT5G18000.1	1	AT5G18000.1	1	2	intron	AT5G18000.1	1	3	.
85733	5	6009516	6009550	6009514	6009548	6	5.8	100	70	0.11027	CGTCCA	34.8			AT5G18180.1	1	.		1	exon	AT5G18180.1	1	2	.
85735	5	6014116	6014135	6014114	6014133	3	6.7	100	40	0.303382	GAT	20.1			.		AT5G18190.2	1	1	intron	AT5G18190.1	1	2	.
85848	5	6171945	6171966	6171943	6171964	2	11	100	44	0.954678	CA	22			AT5G18570.1	1	AT5G18570.1	1	2	intron	AT5G18570.1	1	3	.
85884	5	6251809	6251833	6251807	6251831	3	8.3	90	43	0.438104	ATG	24.9			AT5G18740.1	1	.		1	exon	AT5G18740.1	1	2	.
85935	5	6338828	6338864	6338826	6338862	2	18.5	100	74	1.02652	AT	37			.		.		0	DHS	AT5G18980.1	1	1	DHS
85970	5	6387518	6387541	6387516	6387539	2	12	90	41	0.895204	TC	24			.		.		0	DHS	AT5G19090.1	1	1	DHS
86012	5	6432767	6432786	6432765	6432784	3	6.7	100	40	0.303382	TGA	20.1			.		.		0	plus/minus 1kb	AT5G19160.1	1	1	.
86025	5	6447972	6448001	6447970	6447999	2	14.5	93	53	1.06417	AT	29			.		.		0	plus/minus 1kb	AT5G19170.1	1	1	.
86073	5	6488419	6488441	6488417	6488439	2	11.5	100	46	0.993576	AG	23			.		.		0	plus/minus 1kb	AT5G19280.1	1	1	.
86080	5	6503255	6503278	6503253	6503276	3	8	90	41	0.379879	GAA	24			AT5G19310.1	1	.		1	exon	AT5G19310.1	1	2	.
86090	5	6515747	6515774	6515745	6515772	3	9.3	100	56	0.78188	TGT	27.9			AT5G19340.1	1	.		1	exon	AT5G19340.1	1	2	.
86094	5	6524371	6524405	6524369	6524403	2	17.5	93	63	1.07374	AT	35			AT5G19370.1	1	AT5G19370.1	1	2	intron	AT5G19370.1	1	3	.
86136	5	6616053	6616094	6616051	6616092	2	21	100	84	0.930793	AT	42			AT5G19600.1	1	AT5G19600.1	1	2	intron/DHS	AT5G19600.1	1	3	DHS
86142	5	6630054	6630110	6630052	6630108	2	28.5	100	114	0.834841	AT	57			.		.		0	plus/minus 1kb	AT5G19630.1	1	1	.
86171	5	6665001	6665044	6664999	6665042	2	22	100	88	0.894085	AT	44			AT5G19710.1	1	AT5G19710.1	1	2	intron	AT5G19710.1	1	3	.
86197	5	6690792	6690824	6690790	6690822	3	11	100	66	0.971797	CTC	33			AT5G19800.1	1	.		1	exon	AT5G19790.1	1	2	.
86258	5	6822284	6822307	6822282	6822305	3	8	100	48	0.573207	TTC	24			AT5G20220.1	1	.		1	exon	AT5G20200.1	1	2	.
86275	5	6839488	6839511	6839486	6839509	3	8	90	41	0.379879	AGA	24			.		.		0		.			.
86346	5	6938626	6938646	6938624	6938644	3	7	100	42	0.37134	GAA	21			.		.		0	DHS	AT5G20500.1	1	1	DHS
86350	5	6947187	6947208	6947185	6947206	3	7.3	100	44	0.435838	ACA	21.9			.		.		0	DHS	AT5G20540.1	1	1	DHS
86352	5	6949902	6949933	6949900	6949931	2	16	100	64	1.09435	AT	32			AT5G20540.1	1	AT5G20540.1	1	2	intron	AT5G20540.1	1	3	.
86473	5	7084708	7084729	7084706	7084727	2	11	100	44	0.954678	GA	22			.		.		0	DHS	AT5G20885.1	1	1	DHS
86497	5	7122465	7122499	7122463	7122497	6	5.8	100	70	0.11027	ATGGCA	34.8			.		.		0	plus/minus 1kb	AT5G20970.1	1	1	.
86550	5	7192870	7192893	7192867	7192890	2	12	90	41	0.895204	TC	24			.		AT5G21150.1	1	1	intron	AT5G21150.1	1	2	.
86592	5	7237497	7237520	7237494	7237517	2	12	90	41	0.895204	TA	24			.		.		0	DHS	AT5G21900.1	1	1	DHS
86626	5	7296201	7296243	7296198	7296240	3	14	92	72	1.06804	AGA	42			AT5G22035.1	1	AT5G22035.1	1	2	intron	AT5G22035.1	1	3	.
86644	5	7315454	7315491	7315451	7315488	3	12.7	91	41	0.99459	TCT	38.1			AT5G22090.1	1	.		1	exon/DHS	AT5G22090.1	1	2	DHS
86899	5	7660433	7660460	7660430	7660457	3	8.7	96	42	0.613037	TTA	26.1			.		.		0	plus/minus 1kb	AT5G22910.1	1	1	.
86907	5	7669381	7669404	7669378	7669401	2	12	90	41	0.895204	GA	24			.		.		0	plus/minus 1kb	AT5G22930.1	1	1	.
86952	5	7705685	7705715	7705682	7705712	2	15.5	93	55	1.08081	AT	31			AT5G23010.1	1	AT5G23010.1	1	2	intron	AT5G23010.1	1	3	.
86978	5	7720798	7720819	7720795	7720816	2	11	100	44	0.954678	AT	22			AT5G23020.1	1	AT5G23020.1	1	2	intron	AT5G23020.1	1	3	.
87038	5	7814648	7814669	7814645	7814666	2	11	100	44	0.954678	AT	22			AT5G23210.1	1	AT5G23210.1	1	2	intron	AT5G23210.1	1	3	.
87072	5	7843029	7843061	7843026	7843058	3	11	93	59	0.878982	AAC	33			AT5G23280.1	1	.		1	exon	AT5G23280.1	1	2	.
87081	5	7870184	7870250	7870181	7870247	2	33.5	96	127	1.02306	TC	67			.		.		0	plus/minus 1kb	AT5G23390.1	1	1	.
87092	5	7889668	7889688	7889665	7889685	3	7	100	42	0.37134	AAC	21			AT5G23420.1	1	AT5G23420.1	1	2	intron	AT5G23420.1	1	3	.
87126	5	7952540	7952569	7952537	7952566	2	15	100	60	1.10325	AG	30			.		.		0	DHS	AT5G23580.1	1	1	DHS
87131	5	7956734	7956759	7956731	7956756	3	8.7	91	45	0.530293	GAA	26.1			.		.		0	plus/minus 1kb	AT5G23600.1	1	1	.
87151	5	7980640	7980664	7980637	7980661	2	12.5	100	50	1.05197	TA	25			.		.		0		.			.
87155	5	7986203	7986228	7986200	7986225	3	8.7	100	52	0.692832	ACC	26.1			AT5G23680.1	1	.		1	exon	AT5G23680.1	1	2	.
87165	5	8006434	8006460	8006431	8006457	3	9	100	54	0.738874	ATG	27			.		.		0	DHS	AT5G23730.1	1	1	DHS
87201	5	8067942	8067977	8067939	8067974	4	7.8	93	45	0.422339	AAAAG	31.2			.		.		0	DHS	AT5G23910.1	1	1	DHS
87214	5	8083356	8083444	8083353	8083441	3	29.7	93	115	0.865453	GAT	89.1			AT5G23950.1	1	.		1	exon	AT5G23950.1	1	2	.
87285	5	8168014	8168055	8168011	8168052	2	21	90	70	1.01153	AT	42			.		.		0	DHS	AT5G24140.1	1	1	DHS
87297	5	8174762	8174787	8174759	8174784	2	13	91	45	0.982079	TA	26			AT5G24150.1	1	AT5G24150.1	1	2	intron	AT5G24150.1	1	3
87329	5	8200571	8200590	8200568	8200587	3	6.7	100	40	0.303382	CAT	20.1			AT5G24190.1	1	.		1	exon	AT5G24190.1	1	2	.
87437	5	8314474	8314511	8314471	8314508	2	19.5	94	71	1.02508	TA	39			.		.		0	DHS	AT5G24355.1	1	1	DHS
87440	5	8315980	8316003	8315977	8316000	2	12	100	48	1.02588	AT	24			.		.		0	DHS	AT5G24360.1	1	1	DHS
87465	5	8355050	8355073	8355047	8355070	3	8	90	41	0.379879	CTC	24			AT5G24460.1	1	.		1	exon	AT5G24460.1	1	2	.
87530	5	8411249	8411272	8411246	8411269	2	12	100	48	1.02588	AT	24			AT5G24580.1	1	AT5G24580.1	1	2	intron	AT5G24580.1	1	3	.
87541	5	8428161	8428231	8428158	8428228	2	35.5	97	135	1.18765	TC	71			.		AT5G24610.1	1	1	intron/DHS	AT5G24610.1	1	2	DHS
87547	5	8433620	8433665	8433617	8433662	2	23	100	92	0.861734	AT	46			AT5G24630.1	1	AT5G24630.1	1	2	intron	AT5G24630.1	1	3	.
87553	5	8437683	8437702	8437680	8437699	2	10	100	40	0.855577	TG	20			AT5G24650.1	1	AT5G24650.1	1	2	intron	AT5G24640.1	1	3	.
87626	5	8547608	8547634	8547605	8547631	3	9	100	54	0.738874	GAA	27			.		.		0	DHS	AT5G24870.1	1	1	DHS
87634	5	8554545	8554568	8554542	8554565	2	12	90	41	0.895204	TA	24			.		.		0	DHS	AT5G24880.1	1	1	DHS
87679	5	8600319	8600338	8600316	8600335	2	10	100	40	0.855577	TA	20			AT5G24960.1	1	AT5G24960.1	1	2	intron	AT5G24960.1	1	3	.
87831	5	8747585	8747611	8747582	8747608	2	13	92	47	0.994741	AT	26			.		.		0	DHS	AT5G25240.1	1	1	DHS
87991	5	8894121	8894145	8894118	8894142	3	8.3	90	43	0.438104	AAG	24.9			.		.		0	plus/minus 1kb	AT5G25550.1	1	1	.
88085	5	8967674	8967711	8967671	8967708	2	19	94	69	1.03897	TC	38			.		.		0	DHS	AT5G25760.1	1	1	DHS
88154	5	9028128	9028165	9028125	9028162	3	12.7	100	76	1.0807	TGT	38.1	IN_535_TGT_nadpma3		AT5G25880.1	1	AT5G25880.1	1	2	intron/DHS	AT5G25880.1	1	3	DHS
88181	5	9055190	9055209	9055187	9055206	2	10	100	40	0.855577	GA	20			.		.		0	DHS	AT5G25940.1	1	1	DHS
88215	5	9081741	9081768	9081738	9081765	2	14	100	56	1.09696	TA	28			AT5G26000.2	1	AT5G26000.2	1	2	intron	AT5G26000.2	1	3	.
88238	5	9096626	9096645	9096623	9096642	2	10	100	40	0.855577	TC	20			.		.		0	DHS	AT5G26030.1	1	1	DHS
88258	5	9118466	9118489	9118463	9118486	3	8	100	48	0.573207	ACA	24			AT5G26110.1	1	AT5G26110.1	1	2	intron	AT5G26110.1	1	3	.
88448	5	9279550	9279596	9279547	9279593	3	15.7	100	94	1.12235	CAT	47.1	CD_225_CAT_unk		AT5G26673.1	1	.		1	exon	AT5G26673.1	1	2	.
88481	5	9303999	9304031	9303996	9304028	3	11.3	93	61	0.908504	ACA	33.9			.		.		0	DHS	AT5G26720.1	1	1	DHS
88578	5	9357079	9357099	9357076	9357096	3	7	100	42	0.37134	CCG	21			.		.		0	DHS	AT5G26622.2	1	1	DHS
88779	5	9543354	9543375	9543351	9543372	3	7.3	100	44	0.435838	TTG	21.9			AT5G27120.1	1	AT5G27120.1	1	2	intron	AT5G27120.1	1	3	.
88781	5	9544929	9544955	9544926	9544952	3	9	91	47	0.581349	TCT	27			.		.		0		.			.
88841	5	9585566	9585596	9585563	9585593	2	15.5	100	62	1.10049	TC	31			AT5G27230.1	1	AT5G27230.1	1	2	intron	AT5G27230.1	1	3	.
88865	5	9593580	9593604	9593577	9593601	3	8.3	100	50	0.6266	TAT	24.9			.		.		0	plus/minus 1kb	AT5G27238.1	1	1	.
88911	5	9640222	9640247	9640219	9640244	3	9.3	91	42	0.629519	ATA	27.9			.		.		0		.			.
88945	5	9653967	9653991	9653964	9653988	2	13	91	45	0.982079	TA	26			AT5G27350.1	1	AT5G27350.1	1	2	intron	AT5G27350.1	1	3	.
89009	5	9716249	9716271	9716246	9716268	3	7.7	100	46	0.516554	TCT	23.1			.		.		0	DHS	AT5G27520.1	1	1	DHS
89053	5	9752235	9752274	9752232	9752271	2	20	100	80	0.969646	TA	40			AT5G27606.1	1	AT5G27606.1	1	2	intron	AT5G27606.1	1	3	.
89091	5	9785824	9785845	9785821	9785842	3	7.3	100	44	0.435838	AAG	21.9			AT5G27650.1	1	.		1	exon	AT5G27650.1	1	2	.
89097	5	9792741	9792765	9792738	9792762	3	8.3	90	43	0.438104	TTC	24.9			.		.		0	DHS	AT5G27670.1	1	1	DHS
89436	5	10058491	10058578	10058487	10058574	2	44.5	94	157	1.7095	TC	89			.		.		0		.			.
89719	5	10206192	10206218	10206188	10206214	3	9	100	54	0.738874	TAT	27			.		.		0		.			.
89834	5	10294151	10294173	10294147	10294169	3	7.7	100	46	0.516554	TGT	23.1			AT5G28300.1	1	.		1	exon/DHS	AT5G28300.1	1	2	DHS
89839	5	10294802	10294828	10294798	10294824	3	9	91	47	0.581349	GAT	27			AT5G28300.1	1	.		1	exon	AT5G28300.1	1	2	.
89854	5	10302794	10302814	10302790	10302810	3	7	100	42	0.37134	TTC	21			AT5G28320.1	1	.		1	exon	AT5G28310.1	1	2	.
89876	5	10320170	10320210	10320166	10320206	3	13.7	94	75	1.07122	TCT	41.1			.		.		0	plus/minus 1kb	AT5G28350.1	1	1	.
89896	5	10347361	10347384	10347357	10347380	3	8	100	48	0.573207	GAA	24			AT5G28400.1	1	.		1	exon	AT5G28400.1	1	2	.
89911	5	10369119	10369159	10369115	10369155	3	13.7	94	75	1.07122	GAA	41.1			.		.		0	plus/minus 1kb	AT5G28440.1	1	1	.
89962	5	10418752	10418796	10418748	10418792	2	22.5	100	90	0.877236	TC	45			.		.		0		.			.
90063	5	10493868	10493890	10493864	10493886	2	11.5	100	46	0.993576	TC	23			AT5G28520.1	1	AT5G28520.1	1	2	intron	AT5G28520.1	1	3	.
90165	5	10568210	10568230	10568206	10568226	3	7	100	42	0.37134	TCA	21			.		.		0		.			.
90171	5	10568538	10568586	10568534	10568582	2	24.5	100	98	0.825576	TA	49			.		.		0		.			.
90245	5	10629906	10629938	10629902	10629934	6	5.5	100	66	0.0273186	CAAATG	33			.		.		0		.			.
90353	5	10708337	10708471	10708333	10708467	2	68.5	97	260	2.7122	AG	137			.		.		0		.			.
90377	5	10738615	10738634	10738611	10738630	3	6.7	100	40	0.303382	TGG	20.1			.		.		0		.			.
90394	5	10755215	10755264	10755211	10755260	2	25	91	86	0.906699	AT	50			.		.		0		.			.
90527	5	10841920	10841947	10841916	10841943	3	9.3	92	49	0.646654	ATC	27.9			.		.		0		.			.
90753	5	10993955	10993991	10993951	10993987	4	9.2	93	53	0.673616	TATA	36.8			.		.		0	plus/minus 1kb	AT5G28950.1	1	1	.
91288	5	11452354	11452378	11435124	11435148	3	8.3	90	43	0.438104	TCT	24.9			.		.		0		.			.
91322	5	11503213	11503235	11485983	11486005	2	11.5	100	46	0.993576	AT	23			.		.		0		.			.
92265	5	12403412	12403431	12386182	12386201	3	6.7	100	40	0.303382	CTT	20.1			.		.		0		.			.
92533	5	12607189	12607208	12589959	12589978	2	10	100	40	0.855577	GT	20			AT5G33320.1	1	AT5G33320.1	1	2	intron	AT5G33320.1	1	3	.
92543	5	12616980	12617005	12599750	12599775	2	13	91	45	0.982079	TG	26			.		.		0	plus/minus 1kb	AT5G33355.1	1	1	.
92548	5	12620460	12620487	12603230	12603257	2	14	100	56	1.09696	AT	28			AT5G33370.1	1	AT5G33370.1	1	2	intron	AT5G33370.1	1	3	.
92655	5	12688653	12688700	12671423	12671470	3	16	100	96	1.11862	CTT	48	NC_925_CCT *mislabeled		.		.		0		.			.
93156	5	13128921	13128945	13111691	13111715	2	13	91	45	0.982079	TA	26			.		.		0	DHS	AT5G34850.1	1	1	DHS
93552	5	13407687	13407718	13390457	13390488	3	10.7	100	64	0.944588	AAT	32.1			.		.		0		.			.
94050	5	13739482	13739517	13722252	13722287	2	18	94	65	1.06283	AT	36			AT5G35540.1	1	AT5G35540.1	1	2	intron	AT5G35540.1	1	3	.
94084	5	13755347	13755428	13738117	13738198	3	27.3	95	152	0.846519	GAT	81.9	NC_935_GAT		.		.		0		.			.
94670	5	14199864	14199947	14182634	14182717	2	42	100	168	2.0602	GA	84			.		.		0		.			.
94957	5	14452611	14452678	14435381	14435448	2	34.5	91	110	0.994573	TA	69			.		.		0	plus/minus 1kb	AT5G36730.1	1	1	.
95028	5	14511911	14511978	14494681	14494748	2	34.5	91	110	0.994573	TA	69			.		.		0	plus/minus 1kb	AT5G36820.1	1	1	.
95170	5	14611846	14611870	14594616	14594640	2	12.5	100	50	1.05197	AT	25			.		.		0	DHS	AT5G36940.1	1	1	DHS
95251	5	14665776	14665855	14648546	14648625	3	26.7	94	132	0.853821	TAA	80.1			.		.		0		.			.
95278	5	14676002	14676041	14658772	14658811	4	10	91	45	0.762264	ATAT	40			.		.		0		.			.
95351	5	14743962	14743990	14726732	14726760	3	9.7	100	58	0.834623	GAA	29.1			.		.		0	DHS	AT5G37190.1	1	1	DHS
95369	5	14756849	14756876	14739619	14739646	2	14	100	56	1.09696	GA	28			AT5G37240.1	1	AT5G37240.1	1	2	intron/DHS	AT5G37240.1	1	3	DHS
95469	5	14838479	14838533	14821249	14821303	4	13.8	98	68	1.11709	TATA	55.2			.		.		0		.			.
95490	5	14850469	14850492	14833239	14833262	3	8	100	48	0.573207	ATC	24			.		.		0		.			.
95577	5	14914676	14914699	14897446	14897469	3	8	90	41	0.379879	AGA	24			.		.		0	DHS	AT5G37510.1	1	1	DHS
95602	5	14936878	14936908	14919648	14919678	3	10.3	92	55	0.785797	CTC	30.9			AT5G37550.1	1	.		1	exon	AT5G37550.1	1	2	.
95672	5	15001674	15001700	14984444	14984470	3	8.7	92	47	0.548103	AAG	26.1			.		AT5G37720.1	1	1	intron	AT5G37720.1	1	2	.
95706	5	15021967	15021987	15004737	15004757	3	7	100	42	0.37134	TCA	21			.		.		0	plus/minus 1kb	AT5G37780.1	1	1	.
95711	5	15027979	15028003	15010749	15010773	3	8.3	100	50	0.6266	CTC	24.9			AT5G37790.1	1	.		1	exon	AT5G37790.1	1	2	.
95712	5	15028388	15028407	15011158	15011177	3	6.7	100	40	0.303382	GAA	20.1			.		.		0	DHS	AT5G37790.1	1	1	DHS
96232	5	15376097	15376120	15358867	15358890	3	8	100	48	0.573207	AAT	24	NC_945_AAT		.		.		0		.			.
96260	5	15405248	15405285	15388018	15388055	4	10.8	97	51	0.926148	AAAT	43.2			.		.		0	plus/minus 1kb	AT5G38435.1	1	1	.
96343	5	15481400	15481420	15464170	15464190	3	7	100	42	0.37134	GTT	21			AT5G38620.1	1	.		1	exon	AT5G38620.1	1	2	.
96442	5	15578766	15578791	15561536	15561561	3	8.7	91	45	0.530293	GGA	26.1			.		.		0	plus/minus 1kb	AT5G38860.1	1	1		1	2	HS/5'3'	id-779801
96460	5	15594787	15594813	15577557	15577583	3	9	91	47	0.581349	TGT	27			.		.		0		.			.
96462	5	15600224	15600247	15582994	15583017	4	6.2	95	43	0.0798214	ATAA	24.8			.		.		0	plus/minus 1kb	AT5G38920.1	1	1	.
96478	5	15610397	15610416	15593167	15593186	2	10	100	40	0.855577	AT	20			AT5G38960.1	1	AT5G38960.1	1	2	intron	AT5G38960.1	1	3	.
96676	5	15778800	15778823	15761572	15761595	3	8	90	41	0.379879	TGG	24			.		.		0	DHS	AT5G39380.1	1	1	DHS
96820	5	15912900	15912930	15895672	15895702	3	10.3	100	62	0.904241	CTT	30.9			.		.		0	DHS	AT5G39710.1	1	1	DHS
96827	5	15922383	15922406	15905155	15905178	3	8	90	41	0.379879	TGA	24			AT5G39740.1	1	.		1	exon	AT5G39740.1	1	2	.
96864	5	15945945	15945979	15928717	15928751	3	11.3	90	56	0.866239	TAT	33.9			.		.		0	DHS	AT5G39785.1	1	1	DHS
96907	5	15998461	15998488	15981233	15981260	2	14	92	49	1.04094	AT	28			AT5G39910.1	1	AT5G39910.1	1	2	intron	AT5G39910.1	1	3	.
96928	5	16026661	16026687	16009433	16009459	3	9	91	47	0.581349	CAT	27			.		.		0		.			.
96992	5	16069373	16069400	16052145	16052172	3	9.3	92	49	0.646654	GAA	27.9			AT5G40120.1	1	.		1	exon	AT5G40120.1	1	2	.
97054	5	16139052	16139075	16121824	16121847	3	8	100	48	0.573207	ATG	24			AT5G40320.1	1	.		1	exon	AT5G40320.1	1	2	.
97058	5	16144969	16145053	16127741	16127825	2	43	97	165	1.88985	TC	86			.		.		0	plus/minus 1kb	AT5G40330.1	1	1	.
97070	5	16150923	16150944	16133695	16133716	3	7.3	100	44	0.435838	TCA	21.9			AT5G40340.1	1	.		1	exon	AT5G40340.1	1	2	.
97071	5	16151544	16151644	16134316	16134416	3	33.7	90	167	0.944554	TCT	101.1			AT5G40340.1	1	.		1	exon	AT5G40340.1	1	2	.
97149	5	16249810	16249854	16232582	16232626	3	15	95	83	1.1058	TCA	45			AT5G40520.1	1	.		1	exon	AT5G40520.1	1	2	.
97158	5	16262728	16262750	16245500	16245522	2	11.5	100	46	0.993576	AT	23			AT5G40560.1	1	AT5G40560.1	1	2	intron	AT5G40560.1	1	3	.
97166	5	16270086	16270113	16252858	16252885	5	5.6	100	56	0.0430605	TTCGT	28			.		.		0	DHS	AT5G40595.1	1	1	DHS
97171	5	16272520	16272543	16255292	16255315	2	12.5	91	43	0.949864	AG	25			AT5G40600.1	1	AT5G40600.1	1	2	intron	AT5G40600.1	1	3	.
97248	5	16357157	16357184	16339929	16339956	3	9.3	100	56	0.78188	CTT	27.9			.		.		0	DHS	AT5G40810.1	1	1	DHS
97350	5	16469048	16469071	16451820	16451843	3	8.3	90	43	0.438104	TGA	24.9			.		.		0	plus/minus 1kb	AT5G41110.1	1	1	.
97365	5	16494846	16494876	16477618	16477648	3	10.3	100	62	0.904241	TCT	30.9			AT5G41160.1	1	.		1	exon	AT5G41160.1	1	2	.
97463	5	16590062	16590100	16572834	16572872	2	19.5	100	78	0.989118	AT	39			.		.		0	DHS	AT5G41401.1	1	1	DHS
97464	5	16592953	16592972	16575725	16575744	2	10	100	40	0.855577	CT	20			.		.		0		.			.
97475	5	16597863	16597884	16580635	16580656	3	7.3	100	44	0.435838	ATC	21.9			AT5G41410.1	1	.		1	exon	AT5G41410.1	1	2	.
97476	5	16598149	16598168	16580921	16580940	3	6.7	100	40	0.303382	GAT	20.1			AT5G41410.1	1	.		1	exon	AT5G41410.1	1	2	.
97482	5	16603613	16603664	16586385	16586436	6	8.7	93	76	0.637696	GAGGCA	52.2			AT5G41430.1	1	.		1	exon/DHS	AT5G41430.1	1	2	DHS	1
97483	5	16604705	16604737	16587477	16587509	3	11	93	59	0.878982	GAG	33			AT5G41440.1	1	.		1	exon	AT5G41430.1	1	2	.
97504	5	16636287	16636322	16619059	16619094	2	18	100	72	1.04375	AT	36			AT5G41550.1	1	AT5G41550.1	1	2	intron	AT5G41550.1	1	3	.
97512	5	16647954	16647975	16630726	16630747	3	7.3	100	44	0.435838	GAA	21.9	HS_414_GAA_unk		.		.		0	plus/minus 1kb	AT5G41580.1	1	1		1	2	HS/5'3'	id-833260
97613	5	16796417	16796441	16779189	16779213	3	8.3	100	50	0.6266	GAA	24.9			.		AT5G41910.1	1	1	intron/DHS	AT5G41910.1	1	2	DHS
97648	5	16838598	16838619	16821370	16821391	2	11	100	44	0.954678	AT	22			AT5G42080.1	1	AT5G42080.1	1	2	intron	AT5G42080.1	1	3	.
97656	5	16860613	16860639	16843385	16843411	2	13	92	47	0.994741	TC	26			.		.		0	DHS	AT5G42146.1	1	1	DHS
97680	5	16877345	16877374	16860117	16860146	2	15	100	60	1.10325	AT	30			.		.		0	DHS	AT5G42200.1	1	1	DHS
97703	5	16898365	16898388	16881137	16881160	3	8.3	90	43	0.438104	TAT	24.9			.		AT5G42230.1	1	1	intron	AT5G42230.1	1	2	.
97704	5	16898402	16898421	16881174	16881193	2	10	100	40	0.855577	AT	20			.		AT5G42230.1	1	1	intron	AT5G42230.1	1	2
97708	5	16906784	16906811	16889556	16889583	2	14.5	92	51	1.05688	TA	29			AT5G42240.1	1	AT5G42240.1	1	2	intron	AT5G42240.1	1	3	.
97752	5	16933147	16933172	16915919	16915944	3	8.3	95	45	0.526017	CAC	24.9			AT5G42310.1	1	.		1	exon	AT5G42310.1	1	2	.
97755	5	16938627	16938646	16921399	16921418	3	6.7	100	40	0.303382	TCT	20.1			.		.		0	plus/minus 1kb	AT5G42320.1	1	1	.
97869	5	17054962	17055003	17037734	17037775	7	6	94	77	0.079496	CCCTAAA	42			.		.		0	DHS	AT5G42591.1	1	1	DHS
97891	5	17071562	17071619	17054334	17054391	2	29	100	116	0.848797	AT	58			AT5G42600.1	1	AT5G42600.1	1	2	intron	AT5G42600.1	1	3	.
97904	5	17084284	17084303	17067056	17067075	3	6.7	100	40	0.303382	CAT	20.1			AT5G42620.1	1	.		1	exon	AT5G42620.1	1	2	.
98051	5	17240843	17240865	17223615	17223637	2	11.5	100	46	0.993576	AT	23			.		.		0	DHS	AT5G42950.1	1	1	DHS
98060	5	17252336	17252400	17235108	17235172	2	32	90	109	0.921313	CT	64			.		.		0	DHS	AT5G42960.1	1	1	DHS
98376	5	17523869	17523910	17506642	17506683	2	21	100	84	0.930793	AT	42			AT5G43570.1	1	AT5G43570.1	1	2	intron/DHS	AT5G43570.1	1	3	DHS
98378	5	17524614	17524642	17507387	17507415	2	14.5	100	58	1.1022	TA	29			AT5G43570.1	1	.		1	exon/DHS	AT5G43580.1	1	2	DHS
98408	5	17569331	17569356	17552104	17552129	3	8.7	91	45	0.530293	GAT	26.1			.		.		0	DHS	AT5G43710.1	1	1	DHS
98526	5	17774743	17774782	17757516	17757555	2	20	100	80	0.969646	TA	40			AT5G44120.3	1	AT5G44120.3	1	2	intron	AT5G44120.3	1	3	.
98565	5	17806893	17806918	17789666	17789691	3	8.7	91	45	0.530293	GAA	26.1			AT5G44180.1	1	.		1	exon	AT5G44180.1	1	2	.
98584	5	17828903	17828923	17811676	17811696	3	7	100	42	0.37134	ATT	21			.		.		0	plus/minus 1kb	AT5G44220.1	1	1	.
98617	5	17866686	17866711	17849459	17849484	3	8.7	91	45	0.530293	TTC	26.1			.		.		0	plus/minus 1kb	AT5G44310.1	1	1		1	2	HS/5'3'	id-894195
98651	5	17911770	17911793	17894543	17894566	3	8	100	48	0.573207	GAT	24			.		.		0		.			.
98674	5	17931979	17931998	17914752	17914771	2	10	100	40	0.855577	AG	20			AT5G44450.1	1	AT5G44450.1	1	2	intron	AT5G44450.1	1	3	.
98761	5	18004974	18004994	17987747	17987767	3	7	100	42	0.37134	GAA	21			AT5G44590.1	1	.		1	exon	AT5G44590.1	1	2		1
98763	5	18007287	18007311	17990060	17990084	3	8.3	100	50	0.6266	AAG	24.9			AT5G44600.1	1	.		1	exon	AT5G44600.1	1	2	.
98814	5	18069035	18069062	18051808	18051835	2	14	92	49	1.04094	AG	28			.		.		0	plus/minus 1kb	AT5G44740.1	1	1	.
98832	5	18091675	18091745	18074448	18074518	3	23.3	94	128	0.920015	TAT	69.9			.		.		0		.			.
98847	5	18110522	18110541	18093295	18093314	3	6.7	100	40	0.303382	CTT	20.1	NC_955_CTT		.		.		0	DHS/non gene	.			DHS
98887	5	18135187	18135277	18117960	18118050	2	45.5	100	182	2.48776	TC	91			AT5G44870.1	1	AT5G44870.1	1	2	intron	AT5G44870.1	1	3	.
98920	5	18184128	18184147	18166901	18166920	3	6.7	100	40	0.303382	AAG	20.1			AT5G45000.1	1	.		1	exon	AT5G45000.1	1	2	.
99038	5	18328878	18329001	18311651	18311774	3	41.3	100	248	2.02494	AAG	123.9	HS_425_AAG_RRS1	intergenic	.		.		0	HS	.				1	1	HS	id-917308
99090	5	18391002	18391029	18373775	18373802	4	6.8	95	49	0.230429	AAAG	27.2			.		.		0		.			.
99144	5	18449778	18449801	18432551	18432574	3	7.7	90	41	0.31861	AAC	23.1			.		.		0	plus/minus 1kb	AT5G45500.1	1	1	.
99274	5	18586987	18587010	18569760	18569783	3	8	90	41	0.379879	AGA	24			.		.		0	DHS	AT5G45780.1	1	1	DHS
99282	5	18597183	18597208	18579956	18579981	2	13	100	52	1.07224	AT	26			.		.		0	plus/minus 1kb	AT5G45800.1	1	1	.
99290	5	18602001	18602027	18584774	18584800	2	13.5	92	47	1.02035	AG	27			.		.		0	DHS	AT5G45810.1	1	1	DHS
99301	5	18615077	18615100	18597850	18597873	3	8	90	41	0.379879	GAT	24			.		.		0	DHS	AT5G45840.1	1	1	DHS
99330	5	18647848	18647868	18630621	18630641	3	7	100	42	0.37134	TTC	21			.		.		0	plus/minus 1kb	AT5G45940.1	1	1	.
99345	5	18662768	18662800	18645541	18645573	2	16.5	100	66	1.08521	AT	33			AT5G45970.1	1	AT5G45970.1	1	2	intron	AT5G45970.1	1	3	.
99354	5	18671880	18671925	18654653	18654698	2	23	100	92	0.861734	TA	46			AT5G46000.1	1	AT5G46000.1	1	2	intron	AT5G46000.1	1	3	.
99356	5	18674022	18674052	18656795	18656825	4	7.8	92	48	0.407798	ATAT	31.2			.		.		0	plus/minus 1kb	AT5G46000.1	1	1	.
99359	5	18674537	18674565	18657310	18657338	2	14.5	92	51	1.05688	TA	29			.		.		0	plus/minus 1kb	AT5G46000.1	1	1	.
99385	5	18695105	18695125	18677878	18677898	2	10.5	100	42	0.908802	AT	21			AT5G46050.1	1	AT5G46050.1	1	2	intron	AT5G46050.1	1	3	.
99419	5	18740796	18740816	18723569	18723589	2	10.5	100	42	0.908802	GA	21			AT5G46190.1	1	AT5G46190.1	1	2	intron	AT5G46190.1	1	3	.
99545	5	18942505	18942524	18925278	18925297	2	10	100	40	0.855577	TG	20			AT5G46640.1	1	AT5G46640.1	1	2	intron	AT5G46640.1	1	3	.
99548	5	18943439	18943460	18926212	18926233	3	7.3	100	44	0.435838	CAA	21.9			AT5G46640.1	1	.		1	exon	AT5G46640.1	1	2	.
99634	5	19034065	19034087	19016838	19016860	3	8	90	41	0.379879	GAA	24			AT5G46870.1	1	.		1	exon	AT5G46870.1	1	2	.
99688	5	19084019	19084041	19066792	19066814	4	5.8	100	46	0.0870131	TGAT	23.2			.		.		0	plus/minus 1kb	AT5G46990.1	1	1	.
99770	5	19171522	19171554	19154295	19154327	6	5.5	100	66	0.0273186	TCTTAT	33			.		.		0		.			.
99801	5	19215363	19215391	19198136	19198164	2	15	92	53	1.06851	AT	30			AT5G47300.1	1	.		1	exon	AT5G47290.1	1	2	.
99832	5	19300337	19300381	19283110	19283154	2	23	90	78	0.962257	TG	46			.		.		0	DHS	AT5G47540.1	1	1	DHS
99836	5	19307075	19307102	19289849	19289876	3	10	92	46	0.747237	AGA	30			AT5G47560.1	1	AT5G47560.1	1	2	intron	AT5G47560.1	1	3	.
99849	5	19334985	19335008	19317759	19317782	3	8	90	41	0.379879	TTC	24			.		.		0	DHS	AT5G47690.1	1	1	DHS
99982	5	19461405	19461428	19444179	19444202	3	8	90	41	0.379879	TAT	24			.		.		0	plus/minus 1kb	AT5G48000.2	1	1	.
99998	5	19485892	19485911	19468666	19468685	3	6.7	100	40	0.303382	CCA	20.1			AT5G48030.1	1	.		1	exon	AT5G48030.1	1	2	.
100024	5	19514133	19514162	19496907	19496936	5	6	96	53	0.0621181	GTTGA	30			.		.		0		.			.
100048	5	19549911	19549956	19532685	19532730	6	7.7	95	85	0.469803	GTTCCG	46.2	CD_235_GTTCCG_sleepy2		AT5G48170.1	1	.		1	exon	AT5G48170.1	1	2	.
100080	5	19590092	19590147	19572866	19572921	2	28	92	98	0.864232	AT	56			.		.		0	plus/minus 1kb	AT5G48300.1	1	1	.
100082	5	19601426	19601465	19584200	19584239	6	6.7	94	73	0.236766	CTCCGG	40.2			AT5G48320.1	1	.		1	exon	AT5G48320.1	1	2	.
100094	5	19613590	19613615	19596364	19596389	3	8.7	91	45	0.530293	GAA	26.1			AT5G48360.1	1	.		1	exon	AT5G48360.1	1	2	.
100099	5	19624110	19624135	19606884	19606909	3	8.3	95	45	0.526017	ATG	24.9			.		.		0	DHS	AT5G48380.1	1	1	DHS
100101	5	19625825	19625847	19608599	19608621	2	12	90	41	0.895204	CT	24			.		.		0	DHS	AT5G48385.1	1	1	DHS
100102	5	19628703	19628730	19611477	19611504	3	9.3	92	49	0.646654	ACA	27.9			AT5G48385.1	1	.		1	exon/DHS	AT5G48390.1	1	2	DHS
100158	5	19703515	19703537	19686289	19686311	2	11.5	100	46	0.993576	TA	23			AT5G48560.1	1	AT5G48560.1	1	2	intron/DHS	AT5G48560.1	1	3	DHS
100174	5	19717943	19717978	19700717	19700752	2	18.5	94	67	1.05165	AT	37			AT5G48595.1	1	AT5G48595.1	1	2	intron	AT5G48590.1	1	3	.
100321	5	19878295	19878330	19861069	19861104	3	12	93	58	0.968154	AAG	36			AT5G48980.1	1	.		1	exon	AT5G48980.1	1	2	.
100347	5	19920000	19920041	19902774	19902815	2	21	100	84	0.930793	AT	42			AT5G49110.1	1	AT5G49110.1	1	2	intron	AT5G49110.1	1	3	.
100351	5	19926475	19926525	19909249	19909299	3	17	95	95	1.09903	GTT	51	CD_245_GTT_unk		AT5G49120.1	1	.		1	exon	AT5G49120.1	1	2	.
100414	5	19994652	19994678	19977426	19977452	3	9	100	54	0.738874	AAG	27			.		.		0	DHS	AT5G49280.1	1	1	DHS
100430	5	20017717	20017739	20000491	20000513	2	11.5	100	46	0.993576	TA	23			AT5G49330.1	1	AT5G49330.1	1	2	intron/DHS	AT5G49330.1	1	3	DHS
100435	5	20023573	20023609	20006347	20006383	3	11.7	94	60	0.955185	AAC	35.1			.		.		0	plus/minus 1kb	AT5G49340.1	1	1	.
100469	5	20066882	20066904	20049656	20049678	3	7.7	100	46	0.516554	ATC	23.1			.		.		0	DHS	AT5G49440.1	1	1	DHS
100491	5	20101940	20101964	20084714	20084738	3	8	95	43	0.469246	TAT	24	NC_965_TAT		.		.		0	DHS/non gene	.			DHS
100503	5	20114616	20114639	20097390	20097413	3	8	100	48	0.573207	TCT	24			.		.		0	DHS	AT5G49525.1	1	1	DHS
100509	5	20133227	20133267	20116001	20116041	2	20.5	100	82	0.9501	GA	41			AT5G49570.1	1	AT5G49570.1	1	2	intron	AT5G49570.1	1	3	.
100518	5	20144427	20144446	20127201	20127220	3	6.7	100	40	0.303382	AGA	20.1			.		.		0	plus/minus 1kb	AT5G49580.1	1	1	.
100521	5	20151620	20151647	20134394	20134421	3	9.3	92	49	0.646654	AAG	27.9			.		.		0		.			.
100562	5	20209885	20209916	20192659	20192690	3	10.7	93	57	0.846978	CAA	32.1			AT5G49700.1	1	.		1	exon	AT5G49700.1	1	2	.
100570	5	20225781	20225816	20208555	20208590	3	12	100	72	1.04471	GAT	36	CD_255_GAT_fro7		AT5G49740.1	1	.		1	exon	AT5G49740.1	1	2	.
100574	5	20229261	20229285	20212035	20212059	2	12.5	100	50	1.05197	AT	25			AT5G49750.1	1	AT5G49750.1	1	2	intron	AT5G49750.1	1	3	.
100665	5	20368582	20368626	20351356	20351400	5	8.8	97	83	0.680233	GAGAA	44			.		.		0	DHS	AT5G50010.1	1	1	DHS
100701	5	20423576	20423597	20406350	20406371	3	7.3	100	44	0.435838	GAA	21.9			AT5G50150.1	1	.		1	exon	AT5G50150.1	1	2	.
100718	5	20439158	20439180	20421932	20421954	2	11.5	100	46	0.993576	TG	23			AT5G50170.1	1	AT5G50170.1	1	2	intron	AT5G50170.1	1	3	.
100981	5	20753049	20753072	20735823	20735846	3	8	90	41	0.379879	GAA	24			AT5G50960.1	1	.		1	exon/DHS	AT5G50960.1	1	2	DHS
100984	5	20753643	20753666	20736417	20736440	3	8	90	41	0.379879	AAG	24			AT5G50970.1	1	.		1	exon	AT5G50960.1	1	2	.
100995	5	20770266	20770329	20753040	20753103	3	21.3	100	128	0.948363	CTT	63.9			.		.		0	DHS	AT5G51050.1	1	1	DHS
101098	5	20966687	20966711	20949461	20949485	3	8.3	100	50	0.6266	CTT	24.9			.		.		0	DHS	AT5G51570.1	1	1	DHS
101167	5	21060848	21060874	21043622	21043648	3	9	91	47	0.581349	TCA	27			AT5G51795.1	1	.		1	exon	AT5G51795.1	1	2	.
101196	5	21105962	21105982	21088736	21088756	3	7	100	42	0.37134	ATA	21			.		.		0	DHS	AT5G51880.1	1	1	DHS
101270	5	21208091	21208131	21190865	21190905	2	20.5	100	82	0.9501	TA	41			AT5G52150.1	1	AT5G52150.1	1	2	intron	AT5G52150.1	1	3	.
101305	5	21268759	21268780	21251533	21251554	2	11	100	44	0.954678	GT	22			AT5G52340.1	1	AT5G52340.1	1	2	intron	AT5G52340.1	1	3	.
101328	5	21324653	21324680	21307427	21307454	3	9.3	92	49	0.646654	CAA	27.9			AT5G52510.1	1	.		1	exon	AT5G52510.1	1	2	.
101381	5	21393905	21393927	21376679	21376701	3	7.7	100	46	0.516554	TTG	23.1			AT5G52710.1	1	AT5G52710.1	1	2	intron	AT5G52710.1	1	3	.
101400	5	21428419	21428440	21411193	21411214	3	7.3	100	44	0.435838	TAC	21.9			AT5G52830.1	1	.		1	exon	AT5G52830.1	1	2	.
101413	5	21446364	21446384	21429138	21429158	3	7	100	42	0.37134	GTT	21			AT5G52870.1	1	.		1	exon	AT5G52870.1	1	2	.
101422	5	21454887	21454920	21437661	21437694	2	17	100	68	1.07348	TC	34			AT5G52882.1	1	AT5G52882.1	1	2	intron/DHS	AT5G52882.1	1	3	DHS
101512	5	21580407	21580439	21563181	21563213	2	16.5	100	66	1.08521	AC	33			AT5G53170.1	1	AT5G53170.1	1	2	intron/DHS	AT5G53170.1	1	3	DHS
101575	5	21664732	21664759	21647506	21647533	3	9.3	92	42	0.646654	ATC	27.9			.		.		0	plus/minus 1kb	AT5G53360.1	1	1	.
101631	5	21773021	21773047	21755795	21755821	3	9	91	47	0.581349	TTC	27			.		.		0	plus/minus 1kb	AT5G53550.1	1	1	.
[truncated: 307 more rows]
