# Supplementary material for: Massive variation of short tandem repeats with functional consequences across strains of Arabidopsis thaliana
Source: HighWire-hosted journal article supplement (doi:10.1101/gr.231753.117), 2018-07-03
Supplement: Supplemental_File_S4.zip [file germ_expt_041317.xlsx]

## Sheet: germ_expt_041317.csv
Plate	genotype	stock_center	position	quarter	sucrose	germ_time	germ
1	S082363C	1	1	1	1	72	1
1	S082363C	1	2	1	1	72	1
1	S082363C	1	3	1	1	36	1
1	S082363C	1	7	1	1	48	1
1	S082363C	1	8	1	1	48	1
1	S082363C	1	9	1	1	72	1
1	S082363C	1	15	1	1	48	1
1	S028815c	1	4	2	1	48	1
1	S028815c	1	5	2	1	48	1
1	S028815c	1	6	2	1	48	1
1	S028815c	1	10	2	1	48	1
1	S028815c	1	11	2	1	48	1
1	S028815c	1	12	2	1	48	1
1	S028815c	1	16	2	1	96	1
1	S028815c	1	17	2	1	48	1
1	S028815c	1	18	2	1	36	1
1	Col	0	19	3	1	24	1
1	Col	0	20	3	1	24	1
1	Col	0	21	3	1	24	1
1	Col	0	25	3	1	24	1
1	Col	0	26	3	1	24	1
1	Col	0	27	3	1	24	1
1	Col	0	31	3	1	24	1
1	Col	0	32	3	1	24	1
1	Col	0	33	3	1	24	1
1	S095303c	1	22	4	1	192	0
1	S095303c	1	23	4	1	48	1
1	S095303c	1	24	4	1	48	1
1	S095303c	1	28	4	1	48	1
1	S095303c	1	29	4	1	36	1
1	S095303c	1	30	4	1	192	0
1	S095303c	1	34	4	1	48	1
2	S095303c	1	1	1	1	48	1
2	S095303c	1	2	1	1	192	1
2	S095303c	1	3	1	1	48	1
2	S095303c	1	7	1	1	48	1
2	S095303c	1	8	1	1	192	1
2	S095303c	1	9	1	1	48	1
2	S095303c	1	15	1	1	192	0
2	S082363C	1	4	2	1	48	1
2	S082363C	1	5	2	1	36	1
2	S082363C	1	6	2	1	48	1
2	S082363C	1	10	2	1	192	1
2	S082363C	1	11	2	1	48	1
2	S082363C	1	12	2	1	24	1
2	S082363C	1	16	2	1	48	1
2	S082363C	1	17	2	1	48	1
2	S022640C	1	19	3	1	48	1
2	S022640C	1	20	3	1	72	1
2	S022640C	1	21	3	1	72	1
2	S022640C	1	25	3	1	48	1
2	S022640C	1	26	3	1	36	1
2	S022640C	1	27	3	1	48	1
2	S022640C	1	33	3	1	36	1
2	Col	0	22	4	1	24	1
2	Col	0	23	4	1	24	1
2	Col	0	24	4	1	24	1
2	Col	0	28	4	1	24	1
2	Col	0	29	4	1	24	1
2	Col	0	30	4	1	24	1
2	Col	0	34	4	1	24	1
2	Col	0	35	4	1	24	1
2	Col	0	36	4	1	24	1
3	S028815c	1	1	1	1	48	1
3	S028815c	1	2	1	1	48	1
3	S028815c	1	3	1	1	24	1
3	S028815c	1	4	1	1	48	1
3	S028815c	1	5	1	1	36	1
3	S028815c	1	6	1	1	192	0
3	S028815c	1	7	1	1	48	1
3	S028815c	1	8	1	1	36	1
3	S022640C	1	4	2	1	48	1
3	S022640C	1	5	2	1	48	1
3	S022640C	1	6	2	1	192	0
3	S022640C	1	10	2	1	192	1
3	S022640C	1	11	2	1	48	1
3	S022640C	1	12	2	1	72	1
3	S095303c	1	19	3	1	36	1
3	S095303c	1	20	3	1	80	1
3	S095303c	1	21	3	1	36	1
3	S095303c	1	25	3	1	36	1
3	S095303c	1	26	3	1	36	1
3	S095303c	1	27	3	1	36	1
3	S095303c	1	31	3	1	72	1
3	S095303c	1	32	3	1	48	1
3	S082363C	1	22	4	1	36	1
3	S082363C	1	22	4	1	48	1
3	S082363C	1	22	4	1	48	1
3	S082363C	1	22	4	1	48	1
3	S082363C	1	22	4	1	36	1
3	S082363C	1	22	4	1	48	1
3	S082363C	1	22	4	1	36	1
4	Col	0	1	1	1	24	1
4	Col	0	2	1	1	24	1
4	Col	0	3	1	1	24	1
4	Col	0	7	1	1	24	1
4	Col	0	8	1	1	24	1
4	Col	0	9	1	1	36	1
4	Col	0	13	1	1	24	1
4	Col	0	14	1	1	24	1
4	Col	0	15	1	1	24	1
4	S028815c	1	20	3	1	48	1
4	S028815c	1	21	3	1	48	1
4	S028815c	1	26	3	1	72	1
4	S028815c	1	27	3	1	48	1
4	S022640C	1	22	4	1	48	1
4	S022640C	1	22	4	1	48	1
4	S022640C	1	22	4	1	72	1
4	S022640C	1	22	4	1	48	1
4	S022640C	1	22	4	1	48	1
5	S022640C	1	2	1	1	36	1
5	S022640C	1	3	1	1	36	1
5	S022640C	1	8	1	1	36	1
5	S022640C	1	9	1	1	36	1
5	S022640C	1	15	1	1	72	1
5	Col	0	4	2	1	36	1
5	Col	0	5	2	1	24	1
5	Col	0	6	2	1	24	1
5	Col	0	10	2	1	24	1
5	Col	0	11	2	1	24	1
5	Col	0	12	2	1	24	1
5	Col	0	16	2	1	36	1
5	Col	0	17	2	1	24	1
5	Col	0	18	2	1	24	1
5	S028815c	1	22	4	1	36	1
5	S028815c	1	23	4	1	48	1
5	S028815c	1	24	4	1	36	1
5	S028815c	1	28	4	1	48	1
5	S028815c	1	29	4	1	48	1
6	S082363C	1	1	1	0	48	1
6	S082363C	1	2	1	0	36	1
6	S082363C	1	3	1	0	36	1
6	S082363C	1	7	1	0	36	1
6	S082363C	1	8	1	0	36	1
6	S082363C	1	9	1	0	48	1
6	S082363C	1	15	1	0	48	1
6	S028815c	1	4	2	0	36	1
6	S028815c	1	5	2	0	36	1
6	S028815c	1	6	2	0	48	1
6	S028815c	1	10	2	0	72	1
6	S028815c	1	11	2	0	36	1
6	S028815c	1	12	2	0	48	1
6	S028815c	1	16	2	0	192	0
6	S028815c	1	17	2	0	192	0
6	S028815c	1	18	2	0	48	1
6	Col	0	19	3	0	36	1
6	Col	0	20	3	0	36	1
6	Col	0	21	3	0	24	1
6	Col	0	25	3	0	24	1
6	Col	0	26	3	0	24	1
6	Col	0	27	3	0	24	1
6	Col	0	31	3	0	36	1
6	Col	0	32	3	0	24	1
6	S095303c	1	22	4	0	48	1
6	S095303c	1	23	4	0	48	1
6	S095303c	1	24	4	0	192	0
6	S095303c	1	28	4	0	48	1
6	S095303c	1	29	4	0	48	1
6	S095303c	1	30	4	0	48	1
6	S095303c	1	34	4	0	36	1
7	S095303c	1	1	1	0	48	1
7	S095303c	1	2	1	0	36	1
7	S095303c	1	3	1	0	48	1
7	S095303c	1	7	1	0	48	1
7	S095303c	1	8	1	0	48	1
7	S095303c	1	9	1	0	192	1
7	S095303c	1	15	1	0	48	1
7	S082363C	1	4	2	0	36	1
7	S082363C	1	5	2	0	36	1
7	S082363C	1	6	2	0	48	1
7	S082363C	1	10	2	0	36	1
7	S082363C	1	11	2	0	24	1
7	S082363C	1	12	2	0	80	1
7	S082363C	1	16	2	0	36	1
7	S082363C	1	17	2	0	48	1
7	S022640C	1	19	3	0	36	1
7	S022640C	1	20	3	0	36	1
7	S022640C	1	21	3	0	48	1
7	S022640C	1	25	3	0	36	1
7	S022640C	1	26	3	0	48	1
7	S022640C	1	27	3	0	48	1
7	S022640C	1	33	3	0	48	1
7	Col	0	22	4	0	24	1
7	Col	0	23	4	0	24	1
7	Col	0	24	4	0	24	1
7	Col	0	28	4	0	24	1
7	Col	0	29	4	0	24	1
7	Col	0	30	4	0	24	1
7	Col	0	34	4	0	24	1
7	Col	0	35	4	0	24	1
7	Col	0	36	4	0	24	1
8	S028815c	1	1	1	0	48	1
8	S028815c	1	2	1	0	36	1
8	S028815c	1	3	1	0	72	1
8	S028815c	1	7	1	0	192	1
8	S028815c	1	8	1	0	48	1
8	S028815c	1	9	1	0	48	1
8	S028815c	1	13	1	0	36	1
8	S028815c	1	14	1	0	192	1
8	S022640C	1	4	2	0	72	1
8	S022640C	1	5	2	0	48	1
8	S022640C	1	6	2	0	72	1
8	S022640C	1	10	2	0	36	1
8	S022640C	1	11	2	0	36	1
8	S022640C	1	12	2	0	48	1
8	S022640C	1	16	2	0	48	1
8	S022640C	1	17	2	0	36	1
8	S095303c	1	19	3	0	48	1
8	S095303c	1	20	3	0	192	1
8	S095303c	1	21	3	0	48	1
8	S095303c	1	25	3	0	192	0
8	S095303c	1	26	3	0	72	1
8	S095303c	1	27	3	0	48	1
8	S095303c	1	31	3	0	24	1
8	S095303c	1	32	3	0	72	1
8	S082363C	1	22	4	0	36	1
8	S082363C	1	23	4	0	36	1
8	S082363C	1	24	4	0	36	1
8	S082363C	1	28	4	0	72	1
8	S082363C	1	29	4	0	36	1
8	S082363C	1	30	4	0	72	1
8	S082363C	1	34	4	0	48	1
8	S082363C	1	35	4	0	36	1
9	S022640C	1	1	1	0	36	1
9	S022640C	1	2	1	0	48	1
9	S022640C	1	3	1	0	48	1
9	S022640C	1	7	1	0	36	1
9	S022640C	1	9	1	0	72	1
9	Col	0	4	2	0	24	1
9	Col	0	5	2	0	24	1
9	Col	0	6	2	0	24	1
9	Col	0	10	2	0	24	1
9	Col	0	11	2	0	24	1
9	Col	0	12	2	0	24	1
9	Col	0	16	2	0	24	1
9	Col	0	17	2	0	24	1
9	Col	0	18	2	0	24	1
9	S028815c	1	22	4	0	24	1
9	S028815c	1	23	4	0	24	1
9	S028815c	1	28	4	0	48	1
9	S028815c	1	29	4	0	48	1
10	Col	0	1	1	0	24	1
10	Col	0	2	1	0	24	1
10	Col	0	3	1	0	24	1
10	Col	0	7	1	0	24	1
10	Col	0	8	1	0	24	1
10	Col	0	9	1	0	24	1
10	Col	0	13	1	0	24	1
10	Col	0	14	1	0	24	1
10	Col	0	15	1	0	24	1
10	S028815c	1	21	3	0	36	1
10	S028815c	1	21	3	0	24	1
10	S028815c	1	21	3	0	36	1
10	S028815c	1	21	3	0	36	1
10	S022640C	1	22	4	0	48	1
10	S022640C	1	22	4	0	36	1
10	S022640C	1	22	4	0	72	1
10	S022640C	1	22	4	0	36	1
10	S022640C	1	22	4	0	48	1
10	S022640C	1	22	4	0	48	1
