# Supplementary material for: Massive variation of short tandem repeats with functional consequences across strains of Arabidopsis thaliana
Source: HighWire-hosted journal article supplement (doi:10.1101/gr.231753.117), 2018-07-03
Supplement: Supplemental_File_S4.zip [file gprofiler_results_1067945378461_010917_coding_pur.xlsx]

## Sheet: gProfiler
#	signf	p-value	T	Q	Q&T	Q&T/Q	Q&T/T	term ID	t type	t group	t name	t depth	Q&T list
#
1	!	0.0446	2423	54	14	0.259	0.006	GO:0009889	BP	2	regulation of biosynthetic process	1	AT3G49610,AT3G12270,AT1G02030,AT3G11100,AT2G27990,AT2G42610,AT4G26930,AT4G28640,AT3G08510,AT5G41410,AT5G06710,AT1G18950,AT3G47620,AT1G68360
1	!	0.0421	2409	54	14	0.259	0.006	GO:0031326	BP	2	regulation of cellular biosynthetic process	2	AT3G49610,AT3G12270,AT1G02030,AT3G11100,AT2G27990,AT2G42610,AT4G26930,AT4G28640,AT3G08510,AT5G41410,AT5G06710,AT1G18950,AT3G47620,AT1G68360
1	!	0.0496	2169	54	13	0.241	0.006	GO:2001141	BP	2	regulation of RNA biosynthetic process	1	AT3G49610,AT3G12270,AT1G02030,AT3G11100,AT2G27990,AT2G42610,AT4G26930,AT4G28640,AT5G41410,AT5G06710,AT1G18950,AT3G47620,AT1G68360
1	!	0.0496	2169	54	13	0.241	0.006	GO:1903506	BP	2	regulation of nucleic acid-templated transcription	2	AT3G49610,AT3G12270,AT1G02030,AT3G11100,AT2G27990,AT2G42610,AT4G26930,AT4G28640,AT5G41410,AT5G06710,AT1G18950,AT3G47620,AT1G68360
1	!	0.0489	2166	54	13	0.241	0.006	GO:0006355	BP	2	regulation of transcription, DNA-templated	3	AT3G49610,AT3G12270,AT1G02030,AT3G11100,AT2G27990,AT2G42610,AT4G26930,AT4G28640,AT5G41410,AT5G06710,AT1G18950,AT3G47620,AT1G68360
1	!	0.0103	11	54	2	0.037	0.182	GO:0000788	CC	1	nuclear nucleosome	1	AT3G46030,AT3G45980
1	!	0.05	3655	54	18	0.333	0.005	GO:0003676	MF	7	nucleic acid binding	1	AT3G49610,AT3G46030,AT1G02030,AT3G55460,AT2G27990,AT2G42610,AT3G06490,AT5G39740,AT4G26930,AT3G09850,AT5G41410,AT5G55670,AT5G06710,AT3G45980,AT3G47620,AT5G46190,AT1G68360,AT5G46870
1	!	0.0272	76	54	3	0.056	0.039	GO:0003779	MF	3	actin binding	1	AT5G48360,AT1G09720,AT1G21980
#INFO:	PARAMETERS: sort_by_structure = 1
#INFO:	PARAMETERS: fdr = 1
#INFO:	PARAMETERS: organism = athaliana
#INFO:	PARAMETERS: significant = 1
#INFO:	PARAMETERS: user_thr = 1.00
#INFO:	User: http
#INFO:	Host: arak-prod
#INFO:	Time: 2017-1-9 22:13:29
#INFO:	Version: r1709_e87_eg34
#INFO:	Effective domain size for GO: 22606, threshold 0.00147034
#INFO:	Effective domain size for REAC: 3607, threshold 0.00285578
#INFO:
#INFO:	--- Gene names and descriptions
#INFO:
#INFO:	QUERY:	AT1G02030	ZAT1	Zinc finger protein ZAT1 [Source:UniProtKB/Swiss-Prot;Acc:Q39092]
#INFO:	QUERY:	AT1G07050	N/A	N/A
#INFO:	QUERY:	AT1G09720	NET2B	Protein NETWORKED 2B [Source:UniProtKB/Swiss-Prot;Acc:F4I131]
#INFO:	QUERY:	AT1G16500	N/A	N/A
#INFO:	QUERY:	AT1G18950	DDR4	DDT domain-containing protein DDR4 [Source:UniProtKB/Swiss-Prot;Acc:F4IDY7]
#INFO:	QUERY:	AT1G19530	N/A	N/A
#INFO:	QUERY:	AT1G19780	CNGC8	Putative cyclic nucleotide-gated ion channel 8 [Source:UniProtKB/Swiss-Prot;Acc:Q9FXH6]
#INFO:	QUERY:	AT1G21980	PIP5K1	Phosphatidylinositol 4-phosphate 5-kinase 1 [Source:UniProtKB/Swiss-Prot;Acc:Q56YP2]
#INFO:	QUERY:	AT1G27510	EX2	Protein EXECUTER 2, chloroplastic [Source:UniProtKB/Swiss-Prot;Acc:Q94AT5]
#INFO:	QUERY:	AT1G58210	EMB1674	Protein EMBRYO DEFECTIVE 1674 [Source:UniProtKB/Swiss-Prot;Acc:Q8RWD7]
#INFO:	QUERY:	AT1G68360	N/A	N/A
#INFO:	QUERY:	AT2G03890	PI4KG7	Phosphatidylinositol 4-kinase gamma 7 [Source:UniProtKB/Swiss-Prot;Acc:Q9SI52]
#INFO:	QUERY:	AT2G27990	BLH8	BEL1-like homeodomain protein 8 [Source:UniProtKB/Swiss-Prot;Acc:Q9SJJ3]
#INFO:	QUERY:	AT2G36390	SBE2.1	1,4-alpha-glucan-branching enzyme 2-1, chloroplastic/amyloplastic [Source:UniProtKB/Swiss-Prot;Acc:O23647]
#INFO:	QUERY:	AT2G40830	RHC1A	Probable E3 ubiquitin-protein ligase RHC1A [Source:UniProtKB/Swiss-Prot;Acc:O22197]
#INFO:	QUERY:	AT2G42480	N/A	MATH domain and coiled-coil domain-containing protein At2g42480 [Source:UniProtKB/Swiss-Prot;Acc:P0DKG7]
#INFO:	QUERY:	AT2G42610	LSH10	Protein LIGHT-DEPENDENT SHORT HYPOCOTYLS 10 [Source:UniProtKB/Swiss-Prot;Acc:Q9S7R3]
#INFO:	QUERY:	AT2G44440	EML4	Protein EMSY-LIKE 4 [Source:UniProtKB/Swiss-Prot;Acc:Q08A72]
#INFO:	QUERY:	AT3G06020	FAF4	Protein FANTASTIC FOUR 4 [Source:UniProtKB/Swiss-Prot;Acc:Q9SFG6]
#INFO:	QUERY:	AT3G06490	MYB108	Transcription factor MYB108 [Source:UniProtKB/Swiss-Prot;Acc:Q9LDE1]
#INFO:	QUERY:	AT3G07880	GDI1	Rho GDP-dissociation inhibitor 1 [Source:UniProtKB/Swiss-Prot;Acc:Q9SFC6]
#INFO:	QUERY:	AT3G08510	PLC2	Phosphoinositide phospholipase C 2 [Source:UniProtKB/Swiss-Prot;Acc:Q39033]
#INFO:	QUERY:	AT3G08790	N/A	N/A
#INFO:	QUERY:	AT3G09760	N/A	N/A
#INFO:	QUERY:	AT3G09850	N/A	N/A
#INFO:	QUERY:	AT3G11100	N/A	N/A
#INFO:	QUERY:	AT3G12270	PRMT3	Probable protein arginine N-methyltransferase 3 [Source:UniProtKB/Swiss-Prot;Acc:Q0WVD6]
#INFO:	QUERY:	AT3G14850	TBL41	Protein trichome birefringence-like 41 [Source:UniProtKB/Swiss-Prot;Acc:F4IWA8]
#INFO:	QUERY:	AT3G24535	N/A	N/A
#INFO:	QUERY:	AT3G45980	H2B	Histone H2B.6 [Source:UniProtKB/Swiss-Prot;Acc:O23629]
#INFO:	QUERY:	AT3G46030	N/A	Histone H2B.7 [Source:UniProtKB/Swiss-Prot;Acc:Q9LZT0]
#INFO:	QUERY:	AT3G47620	TCP14	Transcription factor TCP14 [Source:UniProtKB/Swiss-Prot;Acc:Q93Z00]
#INFO:	QUERY:	AT3G49610	N/A	Putative B3 domain-containing protein At3g49610 [Source:UniProtKB/Swiss-Prot;Acc:Q9SCJ8]
#INFO:	QUERY:	AT3G55460	SCL30	Serine/arginine-rich SC35-like splicing factor SCL30 [Source:UniProtKB/Swiss-Prot;Acc:Q8L3X8]
#INFO:	QUERY:	AT3G62630	N/A	N/A
#INFO:	QUERY:	AT4G03220	N/A	Putative F-box/FBD/LRR-repeat protein At4g03220 [Source:UniProtKB/Swiss-Prot;Acc:Q9ZR09]
#INFO:	QUERY:	AT4G10630	N/A	N/A
#INFO:	QUERY:	AT4G18570	N/A	N/A
#INFO:	QUERY:	AT4G24030	N/A	N/A
#INFO:	QUERY:	AT4G26930	N/A	N/A
#INFO:	QUERY:	AT4G28480	N/A	N/A
#INFO:	QUERY:	AT4G28640	IAA11	Auxin-responsive protein IAA11 [Source:UniProtKB/Swiss-Prot;Acc:Q38829]
#INFO:	QUERY:	AT4G29180	N/A	Probable LRR receptor-like serine/threonine-protein kinase At4g29180 [Source:UniProtKB/Swiss-Prot;Acc:C0LGR6]
#INFO:	QUERY:	AT4G34390	XLG2	Extra-large guanine nucleotide-binding protein 2 [Source:UniProtKB/Swiss-Prot;Acc:C6KIE6]
#INFO:	QUERY:	AT4G36230	N/A	N/A
#INFO:	QUERY:	AT4G39010	N/A	Endoglucanase 24 [Source:UniProtKB/Swiss-Prot;Acc:Q93YQ7]
#INFO:	QUERY:	AT5G01980	N/A	N/A
#INFO:	QUERY:	AT5G06710	HAT14	Homeobox-leucine zipper protein HAT14 [Source:UniProtKB/Swiss-Prot;Acc:P46665]
#INFO:	QUERY:	AT5G08600	N/A	N/A
#INFO:	QUERY:	AT5G11600	N/A	N/A
#INFO:	QUERY:	AT5G22090	N/A	Protein FAF-like, chloroplastic [Source:UniProtKB/Swiss-Prot;Acc:Q0V865]
#INFO:	QUERY:	AT5G27650	N/A	N/A
#INFO:	QUERY:	AT5G39740	RPL5B	60S ribosomal protein L5-2 [Source:UniProtKB/Swiss-Prot;Acc:P49227]
#INFO:	QUERY:	AT5G41410	BEL1	Homeobox protein BEL1 homolog [Source:UniProtKB/Swiss-Prot;Acc:Q38897]
#INFO:	QUERY:	AT5G46190	N/A	N/A
#INFO:	QUERY:	AT5G46870	N/A	N/A
#INFO:	QUERY:	AT5G48360	FH9	Formin-like protein 9 [Source:UniProtKB/Swiss-Prot;Acc:Q8GX37]
#INFO:	QUERY:	AT5G48385	FRL3	FRIGIDA-like protein 3 [Source:UniProtKB/Swiss-Prot;Acc:Q67ZB3]
#INFO:	QUERY:	AT5G50970	N/A	N/A
#INFO:	QUERY:	AT5G55670	N/A	N/A
#INFO:	QUERY:	AT5G66800	N/A	N/A
