# Supplementary material for: Massive variation of short tandem repeats with functional consequences across strains of Arabidopsis thaliana
Source: HighWire-hosted journal article supplement (doi:10.1101/gr.231753.117), 2018-07-03
Supplement: Supplemental_File_S4.zip [file gwas_tdna_expt_122616.xlsx]

## Sheet: data
seedling_number	genotype_label	tray_number	tray_row	tray_col	temp	RLN	DTF
1	1	1	1	1	22	12	28
2	2	1	1	2	22	12	28
3	2	1	1	2	22	11	29
4	2	1	1	2	22	13	30
5	3	1	1	3	22	12	25
6	3	1	1	3	22	13	29
7	3	1	1	3	22	11	31
8	4	1	1	4	22	11	27
9	4	1	1	4	22	14	31
10	5	1	1	5	22	12	28
11	5	1	1	5	22	15	29
12	5	1	1	5	22	12	30
13	6	1	1	6	22	8	26
14	6	1	1	6	22	10	28
15	7	1	1	7	22	12	26
16	7	1	1	7	22	14	28
17	8	1	1	8	22	NA	NA
18	9	1	1	9	22	11	27
19	9	1	1	9	22	12	28
20	10	1	2	1	22	13	29
21	10	1	2	1	22	12	32
22	10	1	2	1	22	14	33
23	11	1	2	2	22	15	29
24	1	1	2	3	22	13	25
25	2	1	2	4	22	12	26
26	2	1	2	4	22	13	27
27	2	1	2	4	22	10	28
28	3	1	2	5	22	11	28
29	3	1	2	5	22	13	28
30	3	1	2	5	22	14	30
31	4	1	2	6	22	14	29
32	4	1	2	6	22	16	32
33	5	1	2	7	22	14	29
34	5	1	2	7	22	12	31
35	6	1	2	8	22	14	27
36	7	1	2	9	22	13	28
37	7	1	2	9	22	14	29
38	8	1	3	1	22	NA	NA
39	9	1	3	2	22	12	27
40	9	1	3	2	22	12	28
41	9	1	3	2	22	11	28
42	10	1	3	3	22	13	30
43	10	1	3	3	22	12	31
44	11	1	3	4	22	11	28
45	11	1	3	4	22	11	29
46	11	1	3	4	22	13	30
47	1	1	3	5	22	12	31
48	2	1	3	6	22	12	27
49	2	1	3	6	22	11	28
50	2	1	3	6	22	13	29
51	3	1	3	7	22	13	28
52	3	1	3	7	22	16	32
53	4	1	3	8	22	13	29
54	4	1	3	8	22	13	30
55	4	1	3	8	22	14	33
56	5	1	3	9	22	12	27
57	5	1	3	9	22	13	31
58	5	1	3	9	22	12	32
59	6	1	4	1	22	10	29
60	6	1	4	1	22	11	29
60	7	1	4	2	22	10	26
61	7	1	4	2	22	11	27
62	8	1	4	3	22	NA	NA
62	9	1	4	4	22	12	29
63	9	1	4	4	22	13	29
63	10	1	4	5	22	13	29
63	10	1	4	5	22	12	29
64	10	1	4	5	22	12	31
64	11	1	4	6	22	12	26
64	11	1	4	6	22	10	26
65	11	1	4	6	22	10	27
66	2	1	4	7	22	NA	NA
67	3	1	4	8	22	NA	NA
68	4	1	4	9	22	NA	NA
					mean
					sd

## Sheet: mapping
mapping of randomized keys to genotypes:
number	name	str	gene
1	salk_054560.24.85.x	6204	at1g27570
2	salk_089371.43.30.x	3950	at1g18750
3	salk_138389.43.40.x	6204	at1g27570
4	salk_017009	37195	at2g22000	wrong gene?
5	CS66251	3950	at1g18750
6	salk_048236.22.40.x	846	at1g04660
7	cs314316	43970	at2g44840
8	salk_151535.56.00.x	84729	at5g14060
9	salk_141702.39.50.x	37195	at2g22000	wrong gene?
10	salk_113736.52.85.x	65291	at4g01390
11	Col
