# Supplementary material for: Massive variation of short tandem repeats with functional consequences across strains of Arabidopsis thaliana
Source: HighWire-hosted journal article supplement (doi:10.1101/gr.231753.117), 2018-07-03
Supplement: Supplemental_File_S4.zip [file IDTPlateOrderForm_maxmips_060415.xlsx]

## Sheet: Instructions
INSTRUCTIONS
Scale of Synthesis		Lengths	Standard Mixed Base Instructions
25 nmole		15-60 Bases	R=A,G
100 nmole		15-90 Bases	Y= C,T
250 nmole		5-100 Bases	M= A,C
1 µmol		5-100 Bases	K= G,T
4 nmole Ultramer		45-200 Bases	S= C,G
20 nmole Ultramer		45-200 Bases	W= A,T
Purification Description			H= A,C,T
Standard Desalting			B=C,G,T
PAGE Purification			V= A,C,G
HPLC Purification			D= A,G,T
IE HPLC Purification			N= A,C,G,T
RNase-Free HPLC Purification
Base Notations			Modifications
DNA = A, C, G, T and U, I			Click here for Modification Codes
Phosphorothioated DNA = A*, G*, C*, T*			Please insert modifications within sequence
RNA = rA, rG, rC, rU
Phosphorothioated RNA = rA*, rG*, rC*, rU*			Order Templates
2'O-Methyl RNA = mA, mG, mC, mU			Plate Order Form
Phosphorothioated 2'O-Methyl RNA = mA*, mG*, mC*, mU*			PrimerMix Plate Order Form
Locked Nucleic Acid (LNA) = +A, +G, +C, +T (available on dual labeled probes only)			pMole Plate Order Form
Plate Ordering Information
**Please ensure that each Excel spreadsheet contains accurate information prior to submission.**
Click Here for Plate Ordering Information

## Sheet: Plate Order Form
PLATE ORDER FORM
Ship to Address		Payment Information
First Name		Credit Card Number
Last Name		Name on Card											Select synthesis scale…
PI First Name		Expiration Date											25 nmole DNA Plate Oligo	Standard Desalting
PI Last Name		Purchase Order Number											100 nmole DNA Plate Oligo	Standard Desalting	PAGE Purification	HPLC Purification	RNase-Free HPLC Purification
Organization		OligoCard Number											250 nmole DNA Plate Oligo	Standard Desalting	PAGE Purification	HPLC Purification	RNase-Free HPLC Purification	IE-HPLC Purification
Address Line 1		Quote Number											1 umole DNA Plate Oligo	Standard Desalting	PAGE Purification	HPLC Purification	RNase-Free HPLC Purification	IE-HPLC Purification
Address Line 2													100 nmole RNA Plate Oligo	Standard Desalting	RNase-Free HPLC Purification			IE-HPLC Purification
City		Click Here to Submit Your Order to IDT											250 nmole RNA Plate Oligo	Standard Desalting	RNase-Free HPLC Purification
State/Province		Click Here for a Shortcut to Well Positions											1 umole RNA Plate Oligo	Standard Desalting	RNase-Free HPLC Purification
Postal Code													4 nmole Ultramer DNA Plate Oligo	Standard Desalting
Country		Entry Instructions											20 nmole Ultramer DNA Plate Oligo	Standard Desalting
Telephone		1. Purification must be the same across a plate, but individual oligo amounts or concentrations can vary											PAGE Ultramer Plate Oligo	PAGE Purification
Fax		2. If listing empty well positions enter EMPTY in Sequence Name and Sequence Column, or you can choose not to list the well position for empty wells
Email		3. Multiple plates with the same specifications may be included on one worksheet											Standard Desalting
Bill to Address		Plate Specifications
Same as Ship To Address	No	Scale:	25 nmole DNA Plate Oligo
Organization		Purification:	Standard Desalting
Address Line 1		Plate Type:
Address Line 2		Remainders:
City		Replicate plates:
State/Province		Number of replicates:
Postal Code		Special Instructions
Country
Telephone
Fax													Forward/Reverse Mixed in Wells	nmole/well
Email													Rows [A01,A02,A03]	nmole/well	Full Yield
Plate Name	Well Position	Sequence Name	Sequence	Scale	Purification	Normalization Style	Quantity (nmoles)	Concentration (µM)	Volume (µL)	Buffer	Notes
Plate 1	A1	EXAMPLE 1	TGACTGACTGACTGACCCCCACCTTAAACCCTTAAACCTTTA	25 nmole DNA Plate Oligo	Standard Desalting	Quantity Only
Plate 1	B1	EXAMPLE 2	ATATACATAAAATTTTTTTTTTTTTTTTTTTTTTTTTTTTTTTTTTTTTTTTTT	25 nmole DNA Plate Oligo	Standard Desalting	Quantity Only
Plate 1	C1	EXAMPLE 3	ATTTTTTTAAATTTTTTTTTTTTTTTTTTTTTTTTTTTTTTTTTTTTTT	25 nmole DNA Plate Oligo	Standard Desalting	Full Yield
Plate 1	D1	EXAMPLE 4	TGACTGACTGACTGACCCCC	25 nmole DNA Plate Oligo	Standard Desalting	Full Yield							Ship Dry	N/A	N/A	N/A
Plate 1	E1	EMPTY	EMPTY	25 nmole DNA Plate Oligo	Standard Desalting	Full Yield							Ship Wet	IDTE Buffer pH 7.5 (10mM Tris-HCl, 0.1mM EDTA)	IDTE Buffer pH 8.0 (10mM Tris-HCl, 0.1mM EDTA)	RNase-Free Water
Plate 1	F1	EMPTY	EMPTY	25 nmole DNA Plate Oligo	Standard Desalting
Plate 1	G1	EMPTY	EMPTY	25 nmole DNA Plate Oligo	Standard Desalting
Plate 1	A2	EXAMPLE 5	TGACTGACTGACTGACCCCC	25 nmole DNA Plate Oligo	Standard Desalting	Full Yield
Plate 1	B2	EXAMPLE 1	TGACTGACTGACTGACCCCCACCTTAAACCCTTAAACCTTTA	25 nmole DNA Plate Oligo	Standard Desalting	Full Yield
Plate 1	C2	EXAMPLE 2	TGACTGACTGACTGACCCCC	25 nmole DNA Plate Oligo	Standard Desalting	Full Yield
Plate 1	D2	EXAMPLE 3	TGACTGACTGACTGACCCCC	25 nmole DNA Plate Oligo	Standard Desalting	Full Yield
Plate 1	E2	EXAMPLE 4	TGACTGACTGACTGACCCCC	25 nmole DNA Plate Oligo	Standard Desalting	Full Yield
Plate 1	F2	EMPTY	EMPTY	25 nmole DNA Plate Oligo	Standard Desalting	Full Yield
Plate 1	G2	EXAMPLE 5	TGACTGACTGACTGACCCCC	25 nmole DNA Plate Oligo	Standard Desalting	Full Yield
Plate 1	A3	EMPTY	EMPTY	25 nmole DNA Plate Oligo	Standard Desalting	Full Yield
Plate 1	B3	EMPTY	EMPTY	25 nmole DNA Plate Oligo	Standard Desalting
Plate 1	A3	EMPTY	EMPTY	25 nmole DNA Plate Oligo	Standard Desalting
Plate 1	B3	EMPTY	EMPTY	25 nmole DNA Plate Oligo	Standard Desalting

## Sheet: PrimerMix Plate Order Form
PLATE ORDER FORM
Ship to Address		Payment Information
First Name		Credit Card Number
Last Name		Name on Card
PI First Name		Expiration Date
PI Last Name		Purchase Order Number											25 nmole DNA Plate Oligo	Standard Desalting
Organization		OligoCard Number											100 nmole DNA Plate Oligo	Standard Desalting	PAGE Purification	HPLC Purification	RNase-Free HPLC Purification Purification
Address Line 1		Quote Number											250 nmole DNA Plate Oligo	Standard Desalting	PAGE Purification	HPLC Purification	RNase-Free HPLC Purification Purification
Address Line 2													1 umole DNA Plate Oligo	Standard Desalting	PAGE Purification	HPLC Purification	RNase-Free HPLC Purification Purification
City		Click Here to Submit Your Order to IDT											100 nmole RNA Plate Oligo	Standard Desalting	RNase-Free HPLC Purification
State/Province													250 nmole RNA Plate Oligo	Standard Desalting	RNase-Free HPLC Purification
Postal Code		Click Here for a Shortcut to Well Positions											1 umole RNA Plate Oligo	Standard Desalting	RNase-Free HPLC Purification
Country		Entry Instructions											4 nmole Ultramer DNA Plate Oligo	Standard Desalting
Telephone		1. Purification must be the same across a plate, but individual oligo amounts or concentrations can vary											20 nmole Ultramer DNA Plate Oligo	Standard Desalting
Fax		2. If listing empty well positions enter EMPTY in Sequence Name and Sequence Column											PAGE Ultramer Plate Oligo	PAGE Purification
Email		3. Multiple plates with the same specifications may be included on one worksheet
Bill to Address		Plate Specifications											Standard Desalting
Same as Ship To Address	No	Scale:	25 nmole DNA Plate Oligo
Organization		Purification:	Standard Desalting
Address Line 1		Plate Type:
Address Line 2		Remainders:
City		Replicate plates:
State/Province		Number of replicates:
Postal Code		Special Instructions
Country
Telephone
Fax													Forward/Reverse Mixed in Wells	nmole/well
Email													Rows [A01,A02,A03]	nmole/well	Full Yield
Plate Name	Well Position	Sequence Name	Sequence	Scale	Purification	Normalization Style	Quantity (nmoles)	Final Concentration (µM)	Final Volume (µL)	Buffer	Notes		#REF!
Plate 1	A1	EXAMPLE 1 FOR	TGACTGACTGACTGACCCCC	25 nmole DNA Plate Oligo	Standard Desalting	Concentration And Quantity							#REF!
Plate 1	B1	EXAMPLE 2 FOR	TGACTGACTGACTGACCCCC	25 nmole DNA Plate Oligo	Standard Desalting	Concentration And Quantity							#REF!
Plate 1	C1	EXAMPLE 3 FOR	TGACTGACTGACTGACCCCC	25 nmole DNA Plate Oligo	Standard Desalting	Concentration And Quantity
Plate 1	D1	EXAMPLE 4 FOR	TGACTGACTGACTGACCCCC	25 nmole DNA Plate Oligo	Standard Desalting	Concentration And Quantity
Plate 1	E1	EMPTY	EMPTY	25 nmole DNA Plate Oligo	Standard Desalting	Concentration And Quantity
Plate 1	A1	EXAMPLE 1 REV	TGACTGACTGACTGACCCCC	25 nmole DNA Plate Oligo	Standard Desalting	Concentration And Quantity
Plate 1	B1	EXAMPLE 2 REV	TGACTGACTGACTGACCCCC	25 nmole DNA Plate Oligo	Standard Desalting	Concentration And Quantity
Plate 1	C1	EXAMPLE 3 REV	TGACTGACTGACTGACCCCC	25 nmole DNA Plate Oligo	Standard Desalting	Concentration And Quantity
Plate 1	D1	EXAMPLE 4 REV	TGACTGACTGACTGACCCCC	25 nmole DNA Plate Oligo	Standard Desalting	Concentration And Quantity
Plate 1	E1	EMPTY	EMPTY	25 nmole DNA Plate Oligo	Standard Desalting
Plate 1	A2	EMPTY	EMPTY	25 nmole DNA Plate Oligo	Standard Desalting
Plate 1	B2	EMPTY	EMPTY	25 nmole DNA Plate Oligo	Standard Desalting
Plate 1	C2	EMPTY	EMPTY	25 nmole DNA Plate Oligo	Standard Desalting
Plate 1	D2	EMPTY	EMPTY	25 nmole DNA Plate Oligo	Standard Desalting
Plate 1	E2	EMPTY	EMPTY	25 nmole DNA Plate Oligo	Standard Desalting

## Sheet: pmole Plate Order Form
PLATE ORDER FORM
Ship to Address		Payment Information
First Name		Credit Card Number
Last Name		Name on Card
PI First Name		Expiration Date
PI Last Name		Purchase Order Number
Organization		OligoCard Number
Address Line 1		Quote Number
Address Line 2
City		Click Here to Submit Your Order to IDT
State/Province
Postal Code		Click Here for a Shortcut to Well Positions
Country
		1. Minimum order of 288 oligos per order is required
Telephone		2. Purification must be the same across a plate, but concentrations can vary
Fax		3. If listing empty well positions enter EMPTY in Sequence Name and Sequence Column. Or you can choose not to list the well position for empty wells
Email		4. Multiple plates with the same specifications may be included on one worksheet
Bill to Address		Plate Specifications
Same as Ship To Address	No	Plate Type:	96-well V-bottom
Organization	University of Washington Dept. of Genome Sciences	Scale:	200 picomole Ultramer DNA Plate Oligo
Address Line 1	3720 15th Ave N3720 15th Ave NE	Special Instructions
Address Line 2	Foege Building Room S-410
City	Seattle
State/Province	WA
Postal Code	98195
Country	USA
Telephone
Fax
Email	maximp@uw.edu
Plate Name(s)	Well Position	Sequence Name	Sequence	Scale	Purification	Normalization Style	Quantity (nmoles)	Concentration (µM)	Buffer	Notes
Plate 1	A01	18_0001	GCAATGGCGGCGAGTGAACACAGATGCGTCTTCAGCTTCCCGATATCCGACGGTAGTGTNNNNNNNNAAAAGTGGGCCTAACA	200 picomole Ultramer DNA Plate Oligo	Standard Desalting	Quantity Only	0.2
Plate 1	A02	33_0001_SNP_a	CAATGAATACCGTTGGAGGCTTCGCAGGCCTTCAGCTTCCCGATATCCGACGGTAGTGTNNNNNNNNAACTTTATATCGGAGA	200 picomole Ultramer DNA Plate Oligo	Standard Desalting	Quantity Only	0.2
Plate 1	A03	61_0002	CAAAGATGAGAAGAGCAAGTCAAAGAAGACTTCAGCTTCCCGATATCCGACGGTAGTGTNNNNNNNNTAACAAAGACACAACA	200 picomole Ultramer DNA Plate Oligo	Standard Desalting	Quantity Only	0.2
Plate 1	A04	67_0003	TGGCTTTGCGGTTTCTTCCATTTTCCTTCAGCTTCCCGATATCCGACGGTAGTGTNNNNNNNNCGACCACTTTTGTCTCCTTT	200 picomole Ultramer DNA Plate Oligo	Standard Desalting	Quantity Only	0.2
Plate 1	A05	71_0004	CATTTCCTGCGTTTGGATCGGTCTGGGTCTTCAGCTTCCCGATATCCGACGGTAGTGTNNNNNNNNGAGTTTTGTAAAGACAA	200 picomole Ultramer DNA Plate Oligo	Standard Desalting	Quantity Only	0.2
Plate 1	A06	94_0005	GCTCAATGGTCTTTACGTCAAGGTTGAGACTTCAGCTTCCCGATATCCGACGGTAGTGTNNNNNNNNAAAGGGAACATAAAAC	200 picomole Ultramer DNA Plate Oligo	Standard Desalting	Quantity Only	0.2
Plate 1	A07	96_0006	ATTTGAGCTGAAAGTTTGCTACAAGTGGCTTCAGCTTCCCGATATCCGACGGTAGTGTNNNNNNNNTTGTGTGATGTTTGTG	200 picomole Ultramer DNA Plate Oligo	Standard Desalting	Quantity Only	0.2
Plate 1	A08	116_0007	GTGGTAGTAGTGTTGGTGAGAGTGCTTCAGCTTCCCGATATCCGACGGTAGTGTNNNNNNNNAAGCAAAAATCACGGA	200 picomole Ultramer DNA Plate Oligo	Standard Desalting	Quantity Only	0.2
Plate 1	A09	127_0008	GAGAGAGAGAGAGAGCGACGAGACTTCAGCTTCCCGATATCCGACGGTAGTGTNNNNNNNNTGAAGACGATAAGAGAG	200 picomole Ultramer DNA Plate Oligo	Standard Desalting	Quantity Only	0.2
Plate 1	A10	158_0009	GCTGTTGTTCGATTTCATATGTGATGTTGCTTCAGCTTCCCGATATCCGACGGTAGTGTNNNNNNNNAAAAAGCAATGAGAGC	200 picomole Ultramer DNA Plate Oligo	Standard Desalting	Quantity Only	0.2
Plate 1	A11	175_0010	GGATCAAGAGCGTTGGGCTCTGGACCGTACTTCAGCTTCCCGATATCCGACGGTAGTGTNNNNNNNNTTATTAAACACAAACA	200 picomole Ultramer DNA Plate Oligo	Standard Desalting	Quantity Only	0.2
Plate 1	A12	176_0011	GCGACAAGGTGGTTGGAGGGTCGGCATTCTTCAGCTTCCCGATATCCGACGGTAGTGTNNNNNNNNACTGTACGAAGAGATGA	200 picomole Ultramer DNA Plate Oligo	Standard Desalting	Quantity Only	0.2
Plate 1	B01	188_0012	CCGGAAACGGATGCAGAATTGCGAAGACTTCAGCTTCCCGATATCCGACGGTAGTGTNNNNNNNNTCGTCGTTGTCTGTGG	200 picomole Ultramer DNA Plate Oligo	Standard Desalting	Quantity Only	0.2
Plate 1	B02	189_0013	TCACGGTGCGTTCGTCTGGCGGCTTCATCTTCAGCTTCCCGATATCCGACGGTAGTGTNNNNNNNNCTCACACTATATTTTAA	200 picomole Ultramer DNA Plate Oligo	Standard Desalting	Quantity Only	0.2
Plate 1	B03	211_0014	ATGGAGAGAAGAGAGGTCGAAGACGCCTTCAGCTTCCCGATATCCGACGGTAGTGTNNNNNNNNGTGCTTCGTCTGGTTGTGG	200 picomole Ultramer DNA Plate Oligo	Standard Desalting	Quantity Only	0.2
Plate 1	B04	212_0015	CTCGGAGGTCACAAAAGATCTCACGCCTTCAGCTTCCCGATATCCGACGGTAGTGTNNNNNNNNTCAGGCGTTAGGGGGA	200 picomole Ultramer DNA Plate Oligo	Standard Desalting	Quantity Only	0.2
Plate 1	B05	222_0016	CGGTGTCTTGGGTGGCGGAGGCTGATCTTCAGCTTCCCGATATCCGACGGTAGTGTNNNNNNNNGGTGACTCTGGTCATC	200 picomole Ultramer DNA Plate Oligo	Standard Desalting	Quantity Only	0.2
Plate 1	B06	232_0017	GGACCTGTAGATTATATCTAGGTATCCTTCAGCTTCCCGATATCCGACGGTAGTGTNNNNNNNNCTGCCTCCAGTATCGCTTT	200 picomole Ultramer DNA Plate Oligo	Standard Desalting	Quantity Only	0.2
Plate 1	B07	264_0002	GCAGGCTGAGCTTGATTCTACGGTCTAGCTTCAGCTTCCCGATATCCGACGGTAGTGTNNNNNNNNCGAAACCAACGGTTCA	200 picomole Ultramer DNA Plate Oligo	Standard Desalting	Quantity Only	0.2
Plate 1	B08	299_0020_SNP_a	CCCATCGGTGTTGGGACTTAACGGTGGACTTCAGCTTCCCGATATCCGACGGTAGTGTNNNNNNNNTACCAAAATCACGGCA	200 picomole Ultramer DNA Plate Oligo	Standard Desalting	Quantity Only	0.2
Plate 1	B09	414_0021	GCGTGAGAGTTTATTGATGATAATAAGCCTTCAGCTTCCCGATATCCGACGGTAGTGTNNNNNNNNGTCGTTCGGCGAAGAG	200 picomole Ultramer DNA Plate Oligo	Standard Desalting	Quantity Only	0.2
Plate 1	B10	416_0022	GACAGTGTACGTCACCGATTGCGCTTCAGCTTCCCGATATCCGACGGTAGTGTNNNNNNNNGGGAGGAGAAAGCTTGAAGAGT	200 picomole Ultramer DNA Plate Oligo	Standard Desalting	Quantity Only	0.2
Plate 1	B11	417_0023	GCTCGTTCCATTGCTGGAGCTCATTCCTTCAGCTTCCCGATATCCGACGGTAGTGTNNNNNNNNCTCTCTCAATCTCTCTGT	200 picomole Ultramer DNA Plate Oligo	Standard Desalting	Quantity Only	0.2
Plate 1	B12	418_0024	GCCCACTATCAGAAGGAAGGGTCTTCAGCTTCCCGATATCCGACGGTAGTGTNNNNNNNNGCTTGTTGTCCTTGACTGTAGG	200 picomole Ultramer DNA Plate Oligo	Standard Desalting	Quantity Only	0.2
Plate 1	C01	441_0025	GCGGTTGTAATGGCAGTGAATGTACGCTTCAGCTTCCCGATATCCGACGGTAGTGTNNNNNNNNGGCATGTCTGATGGTTG	200 picomole Ultramer DNA Plate Oligo	Standard Desalting	Quantity Only	0.2
Plate 1	C02	538_0026	GGGCGGCACCTAGAAGCAACATCTTCCAACTTCAGCTTCCCGATATCCGACGGTAGTGTNNNNNNNNTGGTTGCAAGGTTGTT	200 picomole Ultramer DNA Plate Oligo	Standard Desalting	Quantity Only	0.2
Plate 1	C03	571_0027	GGACAAGTTCCGAAGCACATGACGGACTTCAGCTTCCCGATATCCGACGGTAGTGTNNNNNNNNCCAAAAAAAAGAAAGTA	200 picomole Ultramer DNA Plate Oligo	Standard Desalting	Quantity Only	0.2
Plate 1	C04	576_0028	CGGCGCCGTTTATTTATTGTCTATCTTGCTTCAGCTTCCCGATATCCGACGGTAGTGTNNNNNNNNAATACCATACGTGGCAA	200 picomole Ultramer DNA Plate Oligo	Standard Desalting	Quantity Only	0.2
Plate 1	C05	582_0029	ACAATCCTAATGATGCCCTCGCCTTCAGCTTCCCGATATCCGACGGTAGTGTNNNNNNNNCGGTTTTGCTAATGATGACCTTG	200 picomole Ultramer DNA Plate Oligo	Standard Desalting	Quantity Only	0.2
Plate 1	C06	610_0002	GAAAGGAGTGAATATTTGGTTTAGGGCTACTTCAGCTTCCCGATATCCGACGGTAGTGTNNNNNNNNCTTACATGGAATCGTG	200 picomole Ultramer DNA Plate Oligo	Standard Desalting	Quantity Only	0.2
Plate 1	C07	613_0030	CCTTTGGAAGAAACAGAACGAGAAAGCTCTTCAGCTTCCCGATATCCGACGGTAGTGTNNNNNNNNGTAATTTCCTGGAATG	200 picomole Ultramer DNA Plate Oligo	Standard Desalting	Quantity Only	0.2
Plate 1	C08	616_0031	CGAGAGGGCGTATTCCGTAACAAACATGTCTTCAGCTTCCCGATATCCGACGGTAGTGTNNNNNNNNCACAAAAAAAAACTAA	200 picomole Ultramer DNA Plate Oligo	Standard Desalting	Quantity Only	0.2
Plate 1	C09	653_0003	GAAGACAAAGGTTAGATCCATACCCTTCAGCTTCCCGATATCCGACGGTAGTGTNNNNNNNNCCATCTATACGTATTCTTGGG	200 picomole Ultramer DNA Plate Oligo	Standard Desalting	Quantity Only	0.2
Plate 1	C10	660_0033	GTGTTTGCAAGGAGAGGCTGTTGTTTGGCTTCAGCTTCCCGATATCCGACGGTAGTGTNNNNNNNNTGCCGGGCAATAGCAT	200 picomole Ultramer DNA Plate Oligo	Standard Desalting	Quantity Only	0.2
Plate 1	C11	667_0034	GCACGCAGAACGCTATGGTGCTACCGCACTTCAGCTTCCCGATATCCGACGGTAGTGTNNNNNNNNTGCGATTTGGAGTTTT	200 picomole Ultramer DNA Plate Oligo	Standard Desalting	Quantity Only	0.2
Plate 1	C12	681_0035	CGTCGAAGAGGGACTGAGTTGTGTGAGAGCTTCAGCTTCCCGATATCCGACGGTAGTGTNNNNNNNNGAAAACAATGTAAAAG	200 picomole Ultramer DNA Plate Oligo	Standard Desalting	Quantity Only	0.2
Plate 1	D01	733_0036	ACCTGGAGGAGGAGGAAGAGACTTCAGCTTCCCGATATCCGACGGTAGTGTNNNNNNNNGGGTTTTTCCGGAAAGCGG	200 picomole Ultramer DNA Plate Oligo	Standard Desalting	Quantity Only	0.2
Plate 1	D02	734_0037	GAATGTGTAGAGAGAGAGACAAGTTAGGGCTTCAGCTTCCCGATATCCGACGGTAGTGTNNNNNNNNGAAAAGGAACATCAAA	200 picomole Ultramer DNA Plate Oligo	Standard Desalting	Quantity Only	0.2
Plate 1	D03	735_0038_SNP_a	CTTCTTCTTCTTCTTCTTGACCTACGTGGCTTCAGCTTCCCGATATCCGACGGTAGTGTNNNNNNNNGATTTACGTTTTGGTG	200 picomole Ultramer DNA Plate Oligo	Standard Desalting	Quantity Only	0.2
Plate 1	D04	740_0039	GGACTAGTACCTGAACCCAATAGATGCCTTCAGCTTCCCGATATCCGACGGTAGTGTNNNNNNNNGTGATTGACAAGATGCTG	200 picomole Ultramer DNA Plate Oligo	Standard Desalting	Quantity Only	0.2
Plate 1	D05	846_0040	GTTTGGTCAAGGGTTTTGAAAGATCTCGACTTCAGCTTCCCGATATCCGACGGTAGTGTNNNNNNNNGATTTCGTTTTTGTTG	200 picomole Ultramer DNA Plate Oligo	Standard Desalting	Quantity Only	0.2
Plate 1	D06	867_0041	CGAGATCATTGATGACACCGAATGTGGTGCTTCAGCTTCCCGATATCCGACGGTAGTGTNNNNNNNNCAAACAAAGACCAGAG	200 picomole Ultramer DNA Plate Oligo	Standard Desalting	Quantity Only	0.2
Plate 1	D07	875_0042	GTGTTGTATTGAACTGTATAAACCAATTCCTTCAGCTTCCCGATATCCGACGGTAGTGTNNNNNNNNTGGGAGAAGTTGGTCC	200 picomole Ultramer DNA Plate Oligo	Standard Desalting	Quantity Only	0.2
Plate 1	D08	895_0043	GTTTCTTACTTGTCATGGTTTTTGGGATGCTTCAGCTTCCCGATATCCGACGGTAGTGTNNNNNNNNGGAAATGTCGCTAAGA	200 picomole Ultramer DNA Plate Oligo	Standard Desalting	Quantity Only	0.2
Plate 1	D09	966_0044	GCTCTGTGAATGTTGGAGCTCTGTTCTTCAGCTTCCCGATATCCGACGGTAGTGTNNNNNNNNAAGAGAAGTTTCCATGGCG	200 picomole Ultramer DNA Plate Oligo	Standard Desalting	Quantity Only	0.2
Plate 1	D10	1071_0045	TAACAAGACGTGTAGGCGTCTAGCATCACTTCAGCTTCCCGATATCCGACGGTAGTGTNNNNNNNNCAAGTTACTCTTTAAAG	200 picomole Ultramer DNA Plate Oligo	Standard Desalting	Quantity Only	0.2
Plate 1	D11	1088_0046	CAGTCCTTGTCACGTTCCCTTCAGCTTCCCGATATCCGACGGTAGTGTNNNNNNNNTTGTTGGTTTCCATGAGTCTTCTTCTT	200 picomole Ultramer DNA Plate Oligo	Standard Desalting	Quantity Only	0.2
Plate 1	D12	1111_0047	GAGAGCTGCGACTGACCAGATGCATTTACCTTCAGCTTCCCGATATCCGACGGTAGTGTNNNNNNNNTAGCGAAACTCAAAAG	200 picomole Ultramer DNA Plate Oligo	Standard Desalting	Quantity Only	0.2
Plate 1	E01	1153_0048	CTAGGGTTTTCCTTTCCCGGTCTTCAGCTTCCCGATATCCGACGGTAGTGTNNNNNNNNTATTGGCGCCTATTCGAATTTCC	200 picomole Ultramer DNA Plate Oligo	Standard Desalting	Quantity Only	0.2
Plate 1	E02	1175_0049	GCTTTGGATTCTGGAGGCTCTTCAGCTTCCCGATATCCGACGGTAGTGTNNNNNNNNAGGATCCTTTAATGGGAGAGA	200 picomole Ultramer DNA Plate Oligo	Standard Desalting	Quantity Only	0.2
Plate 1	E03	1184_0050	GGCCTACACTCTACAACCAATTTTACGTGCTTCAGCTTCCCGATATCCGACGGTAGTGTNNNNNNNNAAGTCAAAGTCAAAGA	200 picomole Ultramer DNA Plate Oligo	Standard Desalting	Quantity Only	0.2
Plate 1	E04	1206_0051_SNP_a	CTAGGTCTGGACCCACATTCAATCAGCCCTTCAGCTTCCCGATATCCGACGGTAGTGTNNNNNNNNAAATTCATCACCATCA	200 picomole Ultramer DNA Plate Oligo	Standard Desalting	Quantity Only	0.2
Plate 1	E05	1243_0052	GCTCATCAGTCAGTCACATTATTACTCCCTTCAGCTTCCCGATATCCGACGGTAGTGTNNNNNNNNTTCTTCTCTTTCTCCT	200 picomole Ultramer DNA Plate Oligo	Standard Desalting	Quantity Only	0.2
Plate 1	E06	1251_0053	TTTTCAACGTCGTCTTCGTCTTCGTCCTTCAGCTTCCCGATATCCGACGGTAGTGTNNNNNNNNCGTGACATGACTCTGTAGT	200 picomole Ultramer DNA Plate Oligo	Standard Desalting	Quantity Only	0.2
Plate 1	E07	1298_0054	CTGACATTGGTTTTCTCTTGGGCTTGCTTCAGCTTCCCGATATCCGACGGTAGTGTNNNNNNNNGAAAAGGAGGAGGAGA	200 picomole Ultramer DNA Plate Oligo	Standard Desalting	Quantity Only	0.2
Plate 1	E08	1302_0055	CGAAGGGAGAAATAGGAAATGGCCAAAAACTTCAGCTTCCCGATATCCGACGGTAGTGTNNNNNNNNAAAAGAAGAAAAGAGA	200 picomole Ultramer DNA Plate Oligo	Standard Desalting	Quantity Only	0.2
Plate 1	E09	1320_0056	GAAATGAAATGAAGAGCGTAGGAGAGAACTTCAGCTTCCCGATATCCGACGGTAGTGTNNNNNNNNTTTTAAGAGAATCTGAG	200 picomole Ultramer DNA Plate Oligo	Standard Desalting	Quantity Only	0.2
Plate 1	E10	1354_0057	GTCACTAGGGTTTCATTGAGCCATGTGTCTTCAGCTTCCCGATATCCGACGGTAGTGTNNNNNNNNAAAAGCAAAAACAAAAG	200 picomole Ultramer DNA Plate Oligo	Standard Desalting	Quantity Only	0.2
Plate 1	E11	1360_0058	GATGATTTCGAGAGCATTTTCGACATCACCTTCAGCTTCCCGATATCCGACGGTAGTGTNNNNNNNNGAAGGGAAAACAAAAC	200 picomole Ultramer DNA Plate Oligo	Standard Desalting	Quantity Only	0.2
Plate 1	E12	1400_0059	GGGGAGTAATAATGGTTTCCTTGAGGGGCTTCAGCTTCCCGATATCCGACGGTAGTGTNNNNNNNNGTGGTGGAGGAGGCGGA	200 picomole Ultramer DNA Plate Oligo	Standard Desalting	Quantity Only	0.2
Plate 1	F01	1415_0060	GTGGGAGAGGAGCCACGAGTGAAACCTTCAGCTTCCCGATATCCGACGGTAGTGTNNNNNNNNGGAAGCAGGATTAGATAG	200 picomole Ultramer DNA Plate Oligo	Standard Desalting	Quantity Only	0.2
Plate 1	F02	1418_0061	CATAGGGGCATTGAATCAGCTAGCAAGCTTCAGCTTCCCGATATCCGACGGTAGTGTNNNNNNNNCAAGAAAACAAAAACAC	200 picomole Ultramer DNA Plate Oligo	Standard Desalting	Quantity Only	0.2
Plate 1	F03	1424_0062	ACAGCATAAACATTGCAAAAGCCATATGCTTCAGCTTCCCGATATCCGACGGTAGTGTNNNNNNNNTTTGTGGTGTAGGCGA	200 picomole Ultramer DNA Plate Oligo	Standard Desalting	Quantity Only	0.2
Plate 1	F04	1436_0063	GGTTTGAGGAGGGAGGCAAATCAAAGCTTCAGCTTCCCGATATCCGACGGTAGTGTNNNNNNNNGCGTCATCAGATGAAGATG	200 picomole Ultramer DNA Plate Oligo	Standard Desalting	Quantity Only	0.2
Plate 1	F05	1453_0064	GAAGGTGGTGACTTGCGTTCGAAGAGCTTCTTCAGCTTCCCGATATCCGACGGTAGTGTNNNNNNNNAAACGGATTTAGAGAA	200 picomole Ultramer DNA Plate Oligo	Standard Desalting	Quantity Only	0.2
Plate 1	F06	1481_0065	GGGGCATTCAAGCAGTACTGTGTTTCCGACTTCAGCTTCCCGATATCCGACGGTAGTGTNNNNNNNNAGGTGTAGAAAAGTGG	200 picomole Ultramer DNA Plate Oligo	Standard Desalting	Quantity Only	0.2
Plate 1	F07	1510_0066	CGGGTCAGAAAGATCGTTATTTGAGAAGCTTCAGCTTCCCGATATCCGACGGTAGTGTNNNNNNNNGAATGGGTCGGGTGGG	200 picomole Ultramer DNA Plate Oligo	Standard Desalting	Quantity Only	0.2
Plate 1	F08	1591_0067	GCATGGTACGTACTTGGAGTCATCATGCTTCAGCTTCCCGATATCCGACGGTAGTGTNNNNNNNNACATGGCAAACTCAAG	200 picomole Ultramer DNA Plate Oligo	Standard Desalting	Quantity Only	0.2
Plate 1	F09	1612_0069	GCCGAATCCACGTGATTATATGGATGATTCTTCAGCTTCCCGATATCCGACGGTAGTGTNNNNNNNNGGTATGGAGACAGGAG	200 picomole Ultramer DNA Plate Oligo	Standard Desalting	Quantity Only	0.2
Plate 1	F10	1617_0070	GTGGTCAAGATCGGCCATGATTTAACAGCTTCAGCTTCCCGATATCCGACGGTAGTGTNNNNNNNNAAGGAGAAGACAGTCA	200 picomole Ultramer DNA Plate Oligo	Standard Desalting	Quantity Only	0.2
Plate 1	F11	1625_0071	GTTGTTGTGTTTTCTTTTTCTTACGGTGCCTTCAGCTTCCCGATATCCGACGGTAGTGTNNNNNNNNAAGAAGAACCAAAAAA	200 picomole Ultramer DNA Plate Oligo	Standard Desalting	Quantity Only	0.2
Plate 1	F12	1661_0072	GGTACCTAAGACAAAGAAGGCAGAGAAACCTTCAGCTTCCCGATATCCGACGGTAGTGTNNNNNNNNCAGGAATTGAGAAATG	200 picomole Ultramer DNA Plate Oligo	Standard Desalting	Quantity Only	0.2
Plate 1	G01	1665_0073	TGCAGCTCCTCCATCGGATCACTTCAGCTTCCCGATATCCGACGGTAGTGTNNNNNNNNTTTTTAACTCGCCGGCTAAGTTTC	200 picomole Ultramer DNA Plate Oligo	Standard Desalting	Quantity Only	0.2
Plate 1	G02	1756_0074	GCCCTTATTTACCGGTATTTGTTTCTTCAGCTTCCCGATATCCGACGGTAGTGTNNNNNNNNCAATCTCTTCTTCTTCTTC	200 picomole Ultramer DNA Plate Oligo	Standard Desalting	Quantity Only	0.2
Plate 1	G03	1799_0075	GGAAAGTTGAGAGACATCATTCCGGTCCGCTTCAGCTTCCCGATATCCGACGGTAGTGTNNNNNNNNTTGCTGGAAAGGGAGA	200 picomole Ultramer DNA Plate Oligo	Standard Desalting	Quantity Only	0.2
Plate 1	G04	1830_0076	ATGAGAGATTTTAGGGAAATGAGGTTTCCTTCAGCTTCCCGATATCCGACGGTAGTGTNNNNNNNNGAAGAAAACGAATTGAA	200 picomole Ultramer DNA Plate Oligo	Standard Desalting	Quantity Only	0.2
Plate 1	G05	1840_0077	GCTGTGACGGTCTCGTTTGTCTCTTCTTCAGCTTCCCGATATCCGACGGTAGTGTNNNNNNNNTCCAGATGTTCTCATGGTCT	200 picomole Ultramer DNA Plate Oligo	Standard Desalting	Quantity Only	0.2
Plate 1	G06	1848_0078	CACCAGAGGAAACATCAGTGGAGGTCCTTCAGCTTCCCGATATCCGACGGTAGTGTNNNNNNNNTCCAAGAAGAAAGAAG	200 picomole Ultramer DNA Plate Oligo	Standard Desalting	Quantity Only	0.2
Plate 1	G07	1855_0079	GCGTTCTGCTAAAGCACGGTATGAACGAACTTCAGCTTCCCGATATCCGACGGTAGTGTNNNNNNNNTGGGAATGAGATGAAG	200 picomole Ultramer DNA Plate Oligo	Standard Desalting	Quantity Only	0.2
Plate 1	G08	1859_0080	GCGTTAAGGGGAATTGAGATTGGCATGGTCTTCAGCTTCCCGATATCCGACGGTAGTGTNNNNNNNNGTTGGAGACGCAAGAA	200 picomole Ultramer DNA Plate Oligo	Standard Desalting	Quantity Only	0.2
Plate 1	G09	1870_0081	GCCTCGTCTCTACAACTTCGCTTCAGCTTCCCGATATCCGACGGTAGTGTNNNNNNNNGTTCACATGTTCTTATGTTTTACTT	200 picomole Ultramer DNA Plate Oligo	Standard Desalting	Quantity Only	0.2
Plate 1	G10	1873_0082	GCTTTTAGTTTTGTGGGGGAAGATTCCTTCAGCTTCCCGATATCCGACGGTAGTGTNNNNNNNNCTCCAAAAAAGACAAA	200 picomole Ultramer DNA Plate Oligo	Standard Desalting	Quantity Only	0.2
Plate 1	G11	1888_0083	GCCGCTTTGAAGCAAAGTTCTTCTTATCCTTCAGCTTCCCGATATCCGACGGTAGTGTNNNNNNNNGGAGAGAAGAAGTGGTG	200 picomole Ultramer DNA Plate Oligo	Standard Desalting	Quantity Only	0.2
Plate 1	G12	1914_0084_SNP_a	CTATGCTTCATGACGTCACTCTCGGGCTTCAGCTTCCCGATATCCGACGGTAGTGTNNNNNNNNATCAACTTCCTATCTCCAG	200 picomole Ultramer DNA Plate Oligo	Standard Desalting	Quantity Only	0.2
Plate 1	H01	1937_0085	TAGACCAATCAGTTTCCATAGCCACTTCAGCTTCCCGATATCCGACGGTAGTGTNNNNNNNNTTTACCTTCGAAGCTTTTCTC	200 picomole Ultramer DNA Plate Oligo	Standard Desalting	Quantity Only	0.2
Plate 1	H02	1984_0086	GTACGTTGCCGGAGGAAGAGTGGTTTGCGCTTCAGCTTCCCGATATCCGACGGTAGTGTNNNNNNNNCAAGTGATCAAGAACA	200 picomole Ultramer DNA Plate Oligo	Standard Desalting	Quantity Only	0.2
Plate 1	H03	1999_0087	CGGATCTGATTAAGTACGTCGGTAGGAGCTTCAGCTTCCCGATATCCGACGGTAGTGTNNNNNNNNCGGAAAGTCAATAAAA	200 picomole Ultramer DNA Plate Oligo	Standard Desalting	Quantity Only	0.2
Plate 1	H04	2045_0001	CAAATAGAAAAATAGATGGTTCTCGGCTTCAGCTTCCCGATATCCGACGGTAGTGTNNNNNNNNGTTTGGTAGTTGGATCTGG	200 picomole Ultramer DNA Plate Oligo	Standard Desalting	Quantity Only	0.2
Plate 1	H05	2054_0088	GCCTCTCATGGTATGGACTTCCAGCTTCAGCTTCCCGATATCCGACGGTAGTGTNNNNNNNNGGGAGACAGAGTTTGA	200 picomole Ultramer DNA Plate Oligo	Standard Desalting	Quantity Only	0.2
Plate 1	H06	2092_0090	GAAGGAGACGACGATATAAGTAGCTTAGCTTCAGCTTCCCGATATCCGACGGTAGTGTNNNNNNNNAGAAGAACGACAAAAA	200 picomole Ultramer DNA Plate Oligo	Standard Desalting	Quantity Only	0.2
Plate 1	H07	2114_0091	GTACGGTGTCGTTCGTAGTCTTTCTTCAGCTTCCCGATATCCGACGGTAGTGTNNNNNNNNGAGGAGATTCATGGGATGCT	200 picomole Ultramer DNA Plate Oligo	Standard Desalting	Quantity Only	0.2
Plate 1	H08	2169_0092	GAAGAGTGAGTGAGAGAGAAAGAGTGTCTTCAGCTTCCCGATATCCGACGGTAGTGTNNNNNNNNGAAGATTCAGAGGGAATG	200 picomole Ultramer DNA Plate Oligo	Standard Desalting	Quantity Only	0.2
Plate 1	H09	2211_0093	CGGTAACCAAGTGGCTCAAAATCATGACTTCAGCTTCCCGATATCCGACGGTAGTGTNNNNNNNNCTAATGTGGTGATGAA	200 picomole Ultramer DNA Plate Oligo	Standard Desalting	Quantity Only	0.2
Plate 1	H10	2296_0094	AGTCCATAACAAAATAAGAAATGCCAACTTCAGCTTCCCGATATCCGACGGTAGTGTNNNNNNNNGCTCATCCATGTTCGTTT	200 picomole Ultramer DNA Plate Oligo	Standard Desalting	Quantity Only	0.2
Plate 1	H11	2305_0005	CCGTTTGGCCCAATAAAAGCCCCTTCAGCTTCCCGATATCCGACGGTAGTGTNNNNNNNNTCTCGTTTCTTCTCTTTCTCTCT	200 picomole Ultramer DNA Plate Oligo	Standard Desalting	Quantity Only	0.2
Plate 1	H12	2352_0095	AGGACTCTCTGTCTGTCATAGGACAAACCCTTCAGCTTCCCGATATCCGACGGTAGTGTNNNNNNNNGAGAGAGTATAAGTCC	200 picomole Ultramer DNA Plate Oligo	Standard Desalting	Quantity Only	0.2
Plate 2	A01	2362_0096	GAAGTCAGATAGCCATGCAGTTTCAAATCCTTCAGCTTCCCGATATCCGACGGTAGTGTNNNNNNNNGGGGAATTCAGGTGGA	200 picomole Ultramer DNA Plate Oligo	Standard Desalting	Quantity Only	0.2
Plate 2	A02	2374_0097	TAAGAGTCGATTCAAGGAGATGCTTAGCCCTTCAGCTTCCCGATATCCGACGGTAGTGTNNNNNNNNAAAACAATCATAGATC	200 picomole Ultramer DNA Plate Oligo	Standard Desalting	Quantity Only	0.2
Plate 2	A03	2383_0098	CTTCGTTAAATTCGGCAAAGCTTTCGCCTTCAGCTTCCCGATATCCGACGGTAGTGTNNNNNNNNAGAAGAAATAAAAAACAC	200 picomole Ultramer DNA Plate Oligo	Standard Desalting	Quantity Only	0.2
Plate 2	A04	2403_0099	GCAGAGACTCCGGATCCACTGGTAAACTTCAGCTTCCCGATATCCGACGGTAGTGTNNNNNNNNCCGGTTTATATCTATGGTT	200 picomole Ultramer DNA Plate Oligo	Standard Desalting	Quantity Only	0.2
Plate 2	A05	2479_0101	GTAAGTGTGTCTTGTGGTTGCTGTGTTTCCTTCAGCTTCCCGATATCCGACGGTAGTGTNNNNNNNNGTAGAAGCATACGATG	200 picomole Ultramer DNA Plate Oligo	Standard Desalting	Quantity Only	0.2
Plate 2	A06	2496_0102	GCGTTTTTACTGCTGCTGTTGTGGTGCTTCAGCTTCCCGATATCCGACGGTAGTGTNNNNNNNNACAGAAGCAATATTTCGA	200 picomole Ultramer DNA Plate Oligo	Standard Desalting	Quantity Only	0.2
Plate 2	A07	2503_0103	GAGTCGTTCTAAAGTAAAATATTGGCATCTTCAGCTTCCCGATATCCGACGGTAGTGTNNNNNNNNGGTGGGTTTTTGTCTTG	200 picomole Ultramer DNA Plate Oligo	Standard Desalting	Quantity Only	0.2
Plate 2	A08	2538_0104	GTTTCTTTTGATAGCTGTGACGGTCTCGTCTTCAGCTTCCCGATATCCGACGGTAGTGTNNNNNNNNCAGAAGTCGTGAGGAT	200 picomole Ultramer DNA Plate Oligo	Standard Desalting	Quantity Only	0.2
Plate 2	A09	2539_0105	AAAAGTGCTAGTGGCATGACCGCGGCTCTTCAGCTTCCCGATATCCGACGGTAGTGTNNNNNNNNGAGATTAAACTCTGGAAA	200 picomole Ultramer DNA Plate Oligo	Standard Desalting	Quantity Only	0.2
Plate 2	A10	2583_0106	CGGTACTACTATTCAAATGTTGACTTCAGCTTCCCGATATCCGACGGTAGTGTNNNNNNNNCGATGGCAATGGTATGGTCG	200 picomole Ultramer DNA Plate Oligo	Standard Desalting	Quantity Only	0.2
Plate 2	A11	2629_0107	GAAGAAGAAGCAGATTCTCTGAGGGGCTTCAGCTTCCCGATATCCGACGGTAGTGTNNNNNNNNGGGACGTTGAGAAGAG	200 picomole Ultramer DNA Plate Oligo	Standard Desalting	Quantity Only	0.2
Plate 2	A12	2677_0109	GCTGTGTTTTCTCTTTCGTCGGGCTTCAGCTTCCCGATATCCGACGGTAGTGTNNNNNNNNAAAGATTCACAAGCGAG	200 picomole Ultramer DNA Plate Oligo	Standard Desalting	Quantity Only	0.2
Plate 2	B01	2738_0110	GACGTATCTCCATGGTAACCCTGCTTCAGCTTCCCGATATCCGACGGTAGTGTNNNNNNNNGAACTTGAAGACAAAACAC	200 picomole Ultramer DNA Plate Oligo	Standard Desalting	Quantity Only	0.2
Plate 2	B02	2751_0111	GTCGGCCCGTCGCGTTACAAGACCTTCAGCTTCCCGATATCCGACGGTAGTGTNNNNNNNNTTTGCTTTAGAGAGAGGG	200 picomole Ultramer DNA Plate Oligo	Standard Desalting	Quantity Only	0.2
Plate 2	B03	2759_0112	AGTCAATATCAATAGCTTCAAACGAAAACTTCAGCTTCCCGATATCCGACGGTAGTGTNNNNNNNNGAGGTTTGTTTTGCTGC	200 picomole Ultramer DNA Plate Oligo	Standard Desalting	Quantity Only	0.2
Plate 2	B04	2788_0113	CCAAAAGTTTGATCTCTTCACTTCCTTCCTTCAGCTTCCCGATATCCGACGGTAGTGTNNNNNNNNACGTTAACATCCAACAC	200 picomole Ultramer DNA Plate Oligo	Standard Desalting	Quantity Only	0.2
Plate 2	B05	2789_0114	CCAAGGATATTGGTACTACGAAGACGCTTCAGCTTCCCGATATCCGACGGTAGTGTNNNNNNNNAACAAGAACCAAAAAAAA	200 picomole Ultramer DNA Plate Oligo	Standard Desalting	Quantity Only	0.2
Plate 2	B06	2790_0115_SNP_a	CACTTTGGTGTTTCCTCAATGCCCTTCAGCTTCCCGATATCCGACGGTAGTGTNNNNNNNNAAACCGGACTTGACCAAGTTCT	200 picomole Ultramer DNA Plate Oligo	Standard Desalting	Quantity Only	0.2
Plate 2	B07	2810_0116	CCAACAGTCCAAGCCTTTTACTATATTTGCTTCAGCTTCCCGATATCCGACGGTAGTGTNNNNNNNNACCAAAAGGACTCGAA	200 picomole Ultramer DNA Plate Oligo	Standard Desalting	Quantity Only	0.2
Plate 2	B08	2844_0117	GAAACAATTGGAGCGTTAGTTTTGTCTTTCTTCAGCTTCCCGATATCCGACGGTAGTGTNNNNNNNNAAACAAAAGAACACAA	200 picomole Ultramer DNA Plate Oligo	Standard Desalting	Quantity Only	0.2
Plate 2	B09	2845_0118	GCATGCATAAAGCATTATATTTTTGGGCTCTTCAGCTTCCCGATATCCGACGGTAGTGTNNNNNNNNCTATGTGGACGTGATG	200 picomole Ultramer DNA Plate Oligo	Standard Desalting	Quantity Only	0.2
Plate 2	B10	2896_0119	GTGATTACCAGAGACTTGGTGAAGGGCTTCAGCTTCCCGATATCCGACGGTAGTGTNNNNNNNNTTTAACGGTGGCGTTGG	200 picomole Ultramer DNA Plate Oligo	Standard Desalting	Quantity Only	0.2
Plate 2	B11	2912_0120	CCGAGACATATATGTAGTATGTACCCACCCTTCAGCTTCCCGATATCCGACGGTAGTGTNNNNNNNNGACTTGACACTTGAGT	200 picomole Ultramer DNA Plate Oligo	Standard Desalting	Quantity Only	0.2
Plate 2	B12	2950_0121	TGGAAACTCTCTGCGAATCGGAAGTGAACTTCAGCTTCCCGATATCCGACGGTAGTGTNNNNNNNNAGAGAACAATGGAGAA	200 picomole Ultramer DNA Plate Oligo	Standard Desalting	Quantity Only	0.2
Plate 2	C01	3007_0122	GGGATTGAGTCTTCTGTGAGGTCCTTCAGCTTCCCGATATCCGACGGTAGTGTNNNNNNNNACAAAGAAAGAACCCAAG	200 picomole Ultramer DNA Plate Oligo	Standard Desalting	Quantity Only	0.2
Plate 2	C02	3035_0123	CCCGCTAAGAAAAGTGTTGACTTGGTGCTTCAGCTTCCCGATATCCGACGGTAGTGTNNNNNNNNGTTAAGTTGGAAGAAGAG	200 picomole Ultramer DNA Plate Oligo	Standard Desalting	Quantity Only	0.2
Plate 2	C03	3058_0124	GCAGAGTACTTCTGGCTATGGTTGGTTTCTTCAGCTTCCCGATATCCGACGGTAGTGTNNNNNNNNACGTTTCTGTGTATAAG	200 picomole Ultramer DNA Plate Oligo	Standard Desalting	Quantity Only	0.2
Plate 2	C04	3077_0125	CGAGTGGGCATGCCAGAGCTATCACTTCAGCTTCCCGATATCCGACGGTAGTGTNNNNNNNNGAGTAACGCTGATGTTCTCAG	200 picomole Ultramer DNA Plate Oligo	Standard Desalting	Quantity Only	0.2
Plate 2	C05	3118_0126	TAACGGCATGGATGAGCTTCTAGCTGTTCCTTCAGCTTCCCGATATCCGACGGTAGTGTNNNNNNNNCACCTTCCCAAATAAA	200 picomole Ultramer DNA Plate Oligo	Standard Desalting	Quantity Only	0.2
Plate 2	C06	3140_0128	TCCTCTCTCTCCTCGCCGTCCTTCAGCTTCCCGATATCCGACGGTAGTGTNNNNNNNNAGGAACACAATAATGTGTATAGGTT	200 picomole Ultramer DNA Plate Oligo	Standard Desalting	Quantity Only	0.2
Plate 2	C07	3146_0129	TTCTGCTGCTGCTTCTATTCACGATCCTTCAGCTTCCCGATATCCGACGGTAGTGTNNNNNNNNGGAATGGGAGAGAATCAG	200 picomole Ultramer DNA Plate Oligo	Standard Desalting	Quantity Only	0.2
Plate 2	C08	3198_0131	CGGAGGATTTGGCTAGGGACGTTCGAGACCTTCAGCTTCCCGATATCCGACGGTAGTGTNNNNNNNNGCTAACACATAAAATC	200 picomole Ultramer DNA Plate Oligo	Standard Desalting	Quantity Only	0.2
Plate 2	C09	3265_0132	GTTCATATGTATGTTGGGGTCTCTTTTGGCTTCAGCTTCCCGATATCCGACGGTAGTGTNNNNNNNNTCCTATGAATGATATA	200 picomole Ultramer DNA Plate Oligo	Standard Desalting	Quantity Only	0.2
Plate 2	C10	3270_0133	GCTTTTTAATTTAGTTTTGCTTTCTTTCCTTCAGCTTCCCGATATCCGACGGTAGTGTNNNNNNNNGCTAACTTATTTTATCA	200 picomole Ultramer DNA Plate Oligo	Standard Desalting	Quantity Only	0.2
Plate 2	C11	3281_0134	GATGTTTCTGAACCAGCAAACTGCTTGCTTCAGCTTCCCGATATCCGACGGTAGTGTNNNNNNNNGAAACCTTGTGCTTCCAA	200 picomole Ultramer DNA Plate Oligo	Standard Desalting	Quantity Only	0.2
Plate 2	C12	3327_0135_SNP_a	GGCCTTTCTCTTGTAAGCTCTTGACTGTGCTTCAGCTTCCCGATATCCGACGGTAGTGTNNNNNNNNACCAGAGACAACAAAC	200 picomole Ultramer DNA Plate Oligo	Standard Desalting	Quantity Only	0.2
Plate 2	D01	3332_0136	GATGAGAAATTGATGGAATGGTTTTTGTTCTTCAGCTTCCCGATATCCGACGGTAGTGTNNNNNNNNAAGGACTACTGATGTT	200 picomole Ultramer DNA Plate Oligo	Standard Desalting	Quantity Only	0.2
Plate 2	D02	3336_0137	GAAGAGACTTGGGATGTTGGTATGACCTTCAGCTTCCCGATATCCGACGGTAGTGTNNNNNNNNAAACCGAAAAGGGAAGAA	200 picomole Ultramer DNA Plate Oligo	Standard Desalting	Quantity Only	0.2
Plate 2	D03	3345_0138	GGTGTGCCTGAGCCTGAACAGCTTCAGCTTCCCGATATCCGACGGTAGTGTNNNNNNNNGTGGTTTCTGCTGTATCTACG	200 picomole Ultramer DNA Plate Oligo	Standard Desalting	Quantity Only	0.2
Plate 2	D04	3347_0139	TTGTAGGCTACAAATTTCCCCTCCCTTCAGCTTCCCGATATCCGACGGTAGTGTNNNNNNNNGGTGGTCTGTTTCTATCCATC	200 picomole Ultramer DNA Plate Oligo	Standard Desalting	Quantity Only	0.2
Plate 2	D05	3362_0140	GCTTTGATTTCGTCTGGTGTGACCAAGCTTCAGCTTCCCGATATCCGACGGTAGTGTNNNNNNNNGCCGGATTATCAATCGCT	200 picomole Ultramer DNA Plate Oligo	Standard Desalting	Quantity Only	0.2
Plate 2	D06	3384_0142	CGAGCTCGTTGAATTGCATTGTTGTTGCCTTCAGCTTCCCGATATCCGACGGTAGTGTNNNNNNNNAGGCTTGTGTCGTCGT	200 picomole Ultramer DNA Plate Oligo	Standard Desalting	Quantity Only	0.2
Plate 2	D07	3554_0143	ACCTTTGGAGGAGTTTGCTTCTTCTAGAGCTTCAGCTTCCCGATATCCGACGGTAGTGTNNNNNNNNGTATGACTGAACTGGA	200 picomole Ultramer DNA Plate Oligo	Standard Desalting	Quantity Only	0.2
Plate 2	D08	3619_0144	GTGTATTATTTGGTTGAGAGGGGTTTTGCTTCAGCTTCCCGATATCCGACGGTAGTGTNNNNNNNNATGATGAAGGTAAAGGA	200 picomole Ultramer DNA Plate Oligo	Standard Desalting	Quantity Only	0.2
Plate 2	D09	3636_0145	GTTTGGTTTGAACATGGAGAAGGATACAGCTTCAGCTTCCCGATATCCGACGGTAGTGTNNNNNNNNCTAAAGGGAAGGAAGA	200 picomole Ultramer DNA Plate Oligo	Standard Desalting	Quantity Only	0.2
Plate 2	D10	3664_0146	GGATTTGGTTATGGTGATGACGCGATCTTCTTCAGCTTCCCGATATCCGACGGTAGTGTNNNNNNNNTCTACAGAGAGATATA	200 picomole Ultramer DNA Plate Oligo	Standard Desalting	Quantity Only	0.2
Plate 2	D11	3692_0147	GCGTGAGTTCTGTGTGCTCTTCAGCTTCCCGATATCCGACGGTAGTGTNNNNNNNNCGGGATTGCGTGGAAACCATGGAG	200 picomole Ultramer DNA Plate Oligo	Standard Desalting	Quantity Only	0.2
Plate 2	D12	3781_0148	TCGACGAGATTCCCACCACCACCCCTTCAGCTTCCCGATATCCGACGGTAGTGTNNNNNNNNATAAGCTCTCCAGAGTTAGCG	200 picomole Ultramer DNA Plate Oligo	Standard Desalting	Quantity Only	0.2
Plate 2	E01	3806_0149	CTGTGATCTTCTCCTTCTACGTGATGGGCCTTCAGCTTCCCGATATCCGACGGTAGTGTNNNNNNNNGAGAACACAAGGATTG	200 picomole Ultramer DNA Plate Oligo	Standard Desalting	Quantity Only	0.2
Plate 2	E02	3809_0150	GCATCCATTTCCCCAAGTATTGAGACAGCCTTCAGCTTCCCGATATCCGACGGTAGTGTNNNNNNNNCTTTTCCCTGATTCTG	200 picomole Ultramer DNA Plate Oligo	Standard Desalting	Quantity Only	0.2
Plate 2	E03	3884_0151	CCTGGTTTAGTGCTTGACATGGAGAGGCTCTTCAGCTTCCCGATATCCGACGGTAGTGTNNNNNNNNAGAGATACTACAAAAG	200 picomole Ultramer DNA Plate Oligo	Standard Desalting	Quantity Only	0.2
Plate 2	E04	3950_0152	CATTGACAAACATGGACTGATCATGAGGCTTCAGCTTCCCGATATCCGACGGTAGTGTNNNNNNNNCAAAGATACAGAGACA	200 picomole Ultramer DNA Plate Oligo	Standard Desalting	Quantity Only	0.2
Plate 2	E05	3968_0153	GTGTGTTTTCCTTTTCATGTTGCTTGGTGCTTCAGCTTCCCGATATCCGACGGTAGTGTNNNNNNNNAAGGTTTGACTGTTGC	200 picomole Ultramer DNA Plate Oligo	Standard Desalting	Quantity Only	0.2
Plate 2	E06	4021_0154	GCGAAGAGGATAGTGATGAACCCCGGAGCTTCAGCTTCCCGATATCCGACGGTAGTGTNNNNNNNNAGAATATCTGAAGAAGC	200 picomole Ultramer DNA Plate Oligo	Standard Desalting	Quantity Only	0.2
Plate 2	E07	4060_0155	CTCCACCTCCTCTTCTTGATTTATCTAGCTTCAGCTTCCCGATATCCGACGGTAGTGTNNNNNNNNAAACAATATCTTCCCCA	200 picomole Ultramer DNA Plate Oligo	Standard Desalting	Quantity Only	0.2
Plate 2	E08	4091_0008	GCCTTAATCTGATTTTCAAGGATGTGATGCTTCAGCTTCCCGATATCCGACGGTAGTGTNNNNNNNNACAACACCAAAAACTA	200 picomole Ultramer DNA Plate Oligo	Standard Desalting	Quantity Only	0.2
Plate 2	E09	4165_0156	GGTTGTGGCCGATCAAGACAGAATTTAAGCTTCAGCTTCCCGATATCCGACGGTAGTGTNNNNNNNNACAGGAACGATTAGTG	200 picomole Ultramer DNA Plate Oligo	Standard Desalting	Quantity Only	0.2
Plate 2	E10	4175_0157	GTCGATTTCTTCTCTTGTGAGCGACTTGCTTCAGCTTCCCGATATCCGACGGTAGTGTNNNNNNNNCACTAAGATCACTGATA	200 picomole Ultramer DNA Plate Oligo	Standard Desalting	Quantity Only	0.2
Plate 2	E11	4208_0158	CAAGGAGTGATAGTTCTGTTGGATCAAGTCTTCAGCTTCCCGATATCCGACGGTAGTGTNNNNNNNNTGGAGGACTTGGGCTG	200 picomole Ultramer DNA Plate Oligo	Standard Desalting	Quantity Only	0.2
Plate 2	E12	4232_0159	CACAAAGAGAGAGACCAGCTTCAGCTTCCCGATATCCGACGGTAGTGTNNNNNNNNGGTGGAGTTAGGATCGGCGGAGG	200 picomole Ultramer DNA Plate Oligo	Standard Desalting	Quantity Only	0.2
Plate 2	F01	4269_0161	GCGGGATATTGCGGATTTTGTTTGAACCTTCAGCTTCCCGATATCCGACGGTAGTGTNNNNNNNNTGGAACAGAACCAAAA	200 picomole Ultramer DNA Plate Oligo	Standard Desalting	Quantity Only	0.2
Plate 2	F02	4274_0009	GTTCGATAGTCTCTGTACGTATATGGTTCTTCAGCTTCCCGATATCCGACGGTAGTGTNNNNNNNNTGTCGATGTGCTTTGA	200 picomole Ultramer DNA Plate Oligo	Standard Desalting	Quantity Only	0.2
Plate 2	F03	4362_0162	CGGAAATACAGTTTGATCCATTCTCTGCGCTTCAGCTTCCCGATATCCGACGGTAGTGTNNNNNNNNCATACACCTGGTGATA	200 picomole Ultramer DNA Plate Oligo	Standard Desalting	Quantity Only	0.2
Plate 2	F04	4514_0163	GTTGGTGTGGTGTGAGACTTCGAGTGTGCTTCAGCTTCCCGATATCCGACGGTAGTGTNNNNNNNNTATGAAGTAGAAGAAGG	200 picomole Ultramer DNA Plate Oligo	Standard Desalting	Quantity Only	0.2
Plate 2	F05	4522_0164	GAGAAGCCTCTTTGTTGAACAGAGGGCTTCTTCAGCTTCCCGATATCCGACGGTAGTGTNNNNNNNNAAGAAAGACAATGCCG	200 picomole Ultramer DNA Plate Oligo	Standard Desalting	Quantity Only	0.2
Plate 2	F06	4560_0165	TCTGACAAGTCTTCCCTTATTTCTCTTCAGCTTCCCGATATCCGACGGTAGTGTNNNNNNNNAGCACTTGTGTGTTGTACTG	200 picomole Ultramer DNA Plate Oligo	Standard Desalting	Quantity Only	0.2
Plate 2	F07	4565_0166	GTTTTACGATGTCCTCGGCGTTAGCCTTCAGCTTCCCGATATCCGACGGTAGTGTNNNNNNNNGCGTGGAGTGTTTTCGTG	200 picomole Ultramer DNA Plate Oligo	Standard Desalting	Quantity Only	0.2
Plate 2	F08	4630_0167	GTTTCCACCATGCTGGGATTTTATCGCTTCAGCTTCCCGATATCCGACGGTAGTGTNNNNNNNNGCGGCTCGGTTTGCTGT	200 picomole Ultramer DNA Plate Oligo	Standard Desalting	Quantity Only	0.2
Plate 2	F09	4641_0168	GAAAGTAGAGGATAAAGAATGGTGGACTTCAGCTTCCCGATATCCGACGGTAGTGTNNNNNNNNGGAGTGGAGGAGGAAA	200 picomole Ultramer DNA Plate Oligo	Standard Desalting	Quantity Only	0.2
Plate 2	F10	4684_0169	GTAGATAATGGTGGATATGACAAGCGCTTCAGCTTCCCGATATCCGACGGTAGTGTNNNNNNNNGGTTGTTTCTGCTGTTGCT	200 picomole Ultramer DNA Plate Oligo	Standard Desalting	Quantity Only	0.2
Plate 2	F11	4702_0170	GCATTTGCTGTTGTCCGTGCTTCAGCTTCCCGATATCCGACGGTAGTGTNNNNNNNNAGCAGATATGCAAGCTGGTTTG	200 picomole Ultramer DNA Plate Oligo	Standard Desalting	Quantity Only	0.2
Plate 2	F12	4709_0171	GCGGGTTGTTGCTGAATCCTGGGATCTTCAGCTTCCCGATATCCGACGGTAGTGTNNNNNNNNAAACATGACGTTTGGTGAAG	200 picomole Ultramer DNA Plate Oligo	Standard Desalting	Quantity Only	0.2
Plate 2	G01	4736_0172	CATCGCTTAGATGGCGCAAGCGTATTGCTTCAGCTTCCCGATATCCGACGGTAGTGTNNNNNNNNAAAACGACGGAAACGC	200 picomole Ultramer DNA Plate Oligo	Standard Desalting	Quantity Only	0.2
Plate 2	G02	4770_0173_SNP_a	GTCGAAGTCGTGCGTGATGCTAGTTCTTCAGCTTCCCGATATCCGACGGTAGTGTNNNNNNNNCGGTCTAATTTCTCTTCTCC	200 picomole Ultramer DNA Plate Oligo	Standard Desalting	Quantity Only	0.2
Plate 2	G03	4806_0174	GTCCCAAGTTTTAGTGTGAGGTTTTTTTCTTCAGCTTCCCGATATCCGACGGTAGTGTNNNNNNNNCTTCGTTTCAAAACGAG	200 picomole Ultramer DNA Plate Oligo	Standard Desalting	Quantity Only	0.2
Plate 2	G04	4809_0175	GTAGAGAGACGAGACGGTTTGGTGTTGTCTTCAGCTTCCCGATATCCGACGGTAGTGTNNNNNNNNGAGATTGAGGAACATTG	200 picomole Ultramer DNA Plate Oligo	Standard Desalting	Quantity Only	0.2
Plate 2	G05	4821_0176	GAACTTGGAGGTGAAGATTGCTCCGAGGCTTCAGCTTCCCGATATCCGACGGTAGTGTNNNNNNNNAGCTGATCGTAATCTGA	200 picomole Ultramer DNA Plate Oligo	Standard Desalting	Quantity Only	0.2
Plate 2	G06	4854_0177	CGAGAGATTAAAAGATGAACGTTACGCGCTTCAGCTTCCCGATATCCGACGGTAGTGTNNNNNNNNAATCCTACAAGATAATG	200 picomole Ultramer DNA Plate Oligo	Standard Desalting	Quantity Only	0.2
Plate 2	G07	4906_0179	GTTGGATGTGTGATCAATAAGTGTTGGGTCTTCAGCTTCCCGATATCCGACGGTAGTGTNNNNNNNNGGTAACTCAAGAGTTT	200 picomole Ultramer DNA Plate Oligo	Standard Desalting	Quantity Only	0.2
Plate 2	G08	4913_0180	CGAAAAGAGAGCGAAGACTTCGTCGCATACTTCAGCTTCCCGATATCCGACGGTAGTGTNNNNNNNNCATATGAGGCGTAAAG	200 picomole Ultramer DNA Plate Oligo	Standard Desalting	Quantity Only	0.2
Plate 2	G09	4987_0181_SNP_a	GGCGGCGAGGATTGTCCGGAAACGACCTACTTCAGCTTCCCGATATCCGACGGTAGTGTNNNNNNNNCAAATCACTATACAAC	200 picomole Ultramer DNA Plate Oligo	Standard Desalting	Quantity Only	0.2
Plate 2	G10	5016_0182	GTCCAGATCCCGTATTTAGGGAAGGGTTGCTTCAGCTTCCCGATATCCGACGGTAGTGTNNNNNNNNTCAGCTCAAACATGGC	200 picomole Ultramer DNA Plate Oligo	Standard Desalting	Quantity Only	0.2
Plate 2	G11	5069_0183	GATTAGAGTTCCGGGAACTCGTGACCGTCCTTCAGCTTCCCGATATCCGACGGTAGTGTNNNNNNNNAAACAACACTCAAAAG	200 picomole Ultramer DNA Plate Oligo	Standard Desalting	Quantity Only	0.2
Plate 2	G12	5102_0184	GTGTGAGTATTTGAGAGAACGTGGTTGTCCTTCAGCTTCCCGATATCCGACGGTAGTGTNNNNNNNNCCGACACAACAGAGAT	200 picomole Ultramer DNA Plate Oligo	Standard Desalting	Quantity Only	0.2
Plate 2	H01	5122_0185_SNP_a	GTTTTAAGTCGAATACGAAGATCTCCTTCAGCTTCCCGATATCCGACGGTAGTGTNNNNNNNNCTCTTTCGTTGCCTCATTGG	200 picomole Ultramer DNA Plate Oligo	Standard Desalting	Quantity Only	0.2
Plate 2	H02	5160_0186	GCAGAGTTTGTGTTACGTATGTTTGAAGCTTCAGCTTCCCGATATCCGACGGTAGTGTNNNNNNNNATCAATGGACGAAATGC	200 picomole Ultramer DNA Plate Oligo	Standard Desalting	Quantity Only	0.2
Plate 2	H03	5262_0188	GGCCGGAGAATGAAACGTCTCCGACACTTCAGCTTCCCGATATCCGACGGTAGTGTNNNNNNNNGAGGAAAGAAGAGGTA	200 picomole Ultramer DNA Plate Oligo	Standard Desalting	Quantity Only	0.2
Plate 2	H04	5263_0189_SNP_a	GTCTATAACCAGTTAAGACTGAGACAGATCTTCAGCTTCCCGATATCCGACGGTAGTGTNNNNNNNNTGATGATCACCAACAA	200 picomole Ultramer DNA Plate Oligo	Standard Desalting	Quantity Only	0.2
Plate 2	H05	5270_0011	TTGCGACCTTTGGAGTCCCCCTTCAGCTTCCCGATATCCGACGGTAGTGTNNNNNNNNGGCATTGGTCATTGATGTTTACAGC	200 picomole Ultramer DNA Plate Oligo	Standard Desalting	Quantity Only	0.2
Plate 2	H06	5345_0190	GCGGCTGAAGATCATCATCACCATCTTCAGCTTCCCGATATCCGACGGTAGTGTNNNNNNNNCCAAAGTCTCTATAAATTCCA	200 picomole Ultramer DNA Plate Oligo	Standard Desalting	Quantity Only	0.2
Plate 2	H07	5371_0191	CATTGAATGGAAGGAGATTTCAGGGCTTCAGCTTCCCGATATCCGACGGTAGTGTNNNNNNNNGAGAAGTAAAGGTGAGAG	200 picomole Ultramer DNA Plate Oligo	Standard Desalting	Quantity Only	0.2
Plate 2	H08	5389_0012	CGTTTGGCATTTTGGGGTGTCTTCAGCTTCCCGATATCCGACGGTAGTGTNNNNNNNNCTCTGTGGGAAATATGAATGAAATG	200 picomole Ultramer DNA Plate Oligo	Standard Desalting	Quantity Only	0.2
Plate 2	H09	5427_0192_SNP_a	ACAGGTAGAAGACTCACCGAGTTTGCCTTCAGCTTCCCGATATCCGACGGTAGTGTNNNNNNNNTATAGCGCGTCAAGCCTTT	200 picomole Ultramer DNA Plate Oligo	Standard Desalting	Quantity Only	0.2
Plate 2	H10	5442_0193	CGCGTGAGACGTCATTAAGGCTTAGCTTCAGCTTCCCGATATCCGACGGTAGTGTNNNNNNNNGATGGAGAGATAAGGA	200 picomole Ultramer DNA Plate Oligo	Standard Desalting	Quantity Only	0.2
Plate 2	H11	5472_0194	GAATTGCTTGCAAGGAAAGAGAGAGAGACTTCAGCTTCCCGATATCCGACGGTAGTGTNNNNNNNNGCTGACATGTTTATATG	200 picomole Ultramer DNA Plate Oligo	Standard Desalting	Quantity Only	0.2
Plate 2	H12	5520_0195	CGGTATCGGGAAGGCCATACTTGGATTCACTTCAGCTTCCCGATATCCGACGGTAGTGTNNNNNNNNCCACAAAATCTTAAAG	200 picomole Ultramer DNA Plate Oligo	Standard Desalting	Quantity Only	0.2
Plate 3	A01	5535_0196	ATTGTATCTAGGTGTGTGTTTGTCAGCTTCAGCTTCCCGATATCCGACGGTAGTGTNNNNNNNNACATAGTTATCGACATTAT	200 picomole Ultramer DNA Plate Oligo	Standard Desalting	Quantity Only	0.2
Plate 3	A02	5572_0197	GTTTGGAGGGTACTGTGCTTACGAGATCTCTTCAGCTTCCCGATATCCGACGGTAGTGTNNNNNNNNAGTTCTTGAATTCGGA	200 picomole Ultramer DNA Plate Oligo	Standard Desalting	Quantity Only	0.2
Plate 3	A03	5573_0198	GCAAATGTTGGAGAGATGGAGATGGTGCTTCAGCTTCCCGATATCCGACGGTAGTGTNNNNNNNNGTGTTTACCAGAAATGGG	200 picomole Ultramer DNA Plate Oligo	Standard Desalting	Quantity Only	0.2
Plate 3	A04	5578_0199	CGGTTGAGAACGGGAATGGAGCCTTCAGCTTCCCGATATCCGACGGTAGTGTNNNNNNNNGGACTAGATTTTAACATAATGAG	200 picomole Ultramer DNA Plate Oligo	Standard Desalting	Quantity Only	0.2
Plate 3	A05	5590_0200	TGCTTCCGCCCTCTAAATTGCTTCCGCCTTCAGCTTCCCGATATCCGACGGTAGTGTNNNNNNNNTACACTTGTCGAGCTGTT	200 picomole Ultramer DNA Plate Oligo	Standard Desalting	Quantity Only	0.2
Plate 3	A06	5673_0201	GATGAAGCTGTGGAAACGGGCTTCCGGTGCTTCAGCTTCCCGATATCCGACGGTAGTGTNNNNNNNNTAAAACTAAACGAAAA	200 picomole Ultramer DNA Plate Oligo	Standard Desalting	Quantity Only	0.2
Plate 3	A07	5675_0202	GTTTCTTGTTTTCTATCCGCAGATAATGCCTTCAGCTTCCCGATATCCGACGGTAGTGTNNNNNNNNACGGGTTCTCTCATTT	200 picomole Ultramer DNA Plate Oligo	Standard Desalting	Quantity Only	0.2
Plate 3	A08	5709_0013	GTGATGATCGCTCGTAGATCATTAATGCCTTCAGCTTCCCGATATCCGACGGTAGTGTNNNNNNNNAAAACACAAATGGTCCA	200 picomole Ultramer DNA Plate Oligo	Standard Desalting	Quantity Only	0.2
Plate 3	A09	5717_0204	GGAATTGAGGGTCAAGTTCTTGAGAAGCCTTCAGCTTCCCGATATCCGACGGTAGTGTNNNNNNNNCAGAATAAACCAAGGTA	200 picomole Ultramer DNA Plate Oligo	Standard Desalting	Quantity Only	0.2
Plate 3	A10	5747_0205	GGATAAGCAGTGGTCGTTTTCAGCTTCAGCTTCCCGATATCCGACGGTAGTGTNNNNNNNNGTTGAGAGAGAGAGAAGTGAGG	200 picomole Ultramer DNA Plate Oligo	Standard Desalting	Quantity Only	0.2
Plate 3	A11	5787_0206	CAGATGGCCGGAGCTCAACTATAGCCGCCTTCAGCTTCCCGATATCCGACGGTAGTGTNNNNNNNNGGGATCTCAAAAAAACA	200 picomole Ultramer DNA Plate Oligo	Standard Desalting	Quantity Only	0.2
Plate 3	A12	5791_0207	GCATGAGGAGGGATCATCACTACCTTCCTTCAGCTTCCCGATATCCGACGGTAGTGTNNNNNNNNTCTTTGTTTTCCTTGA	200 picomole Ultramer DNA Plate Oligo	Standard Desalting	Quantity Only	0.2
Plate 3	B01	5792_0208	GATTAGGCAGGAAGAGAGCCCAGTACAGACTTCAGCTTCCCGATATCCGACGGTAGTGTNNNNNNNNACAAGAATGAAGCCAA	200 picomole Ultramer DNA Plate Oligo	Standard Desalting	Quantity Only	0.2
Plate 3	B02	5794_0209	GCTGTGATTTCGTCGGCGAAGAGCTTCAGCTTCCCGATATCCGACGGTAGTGTNNNNNNNNCCCCAAATTAGAGTAAACC	200 picomole Ultramer DNA Plate Oligo	Standard Desalting	Quantity Only	0.2
Plate 3	B03	5863_0211	GAGAATGTAAAGGAAGGGTCTGCAGCCTTCAGCTTCCCGATATCCGACGGTAGTGTNNNNNNNNGGGGATTGTGAAACTG	200 picomole Ultramer DNA Plate Oligo	Standard Desalting	Quantity Only	0.2
Plate 3	B04	6008_0212	GGGACCTGGAGTCTTGACGATACGGCTTCAGCTTCCCGATATCCGACGGTAGTGTNNNNNNNNGCTCTCTTCTTTGTGGTTT	200 picomole Ultramer DNA Plate Oligo	Standard Desalting	Quantity Only	0.2
Plate 3	B05	6016_0213	CCCATTAAGGAACTAAAGCCCCTTCAGCTTCCCGATATCCGACGGTAGTGTNNNNNNNNTTCGTCCCATCGCGTTGATTGTT	200 picomole Ultramer DNA Plate Oligo	Standard Desalting	Quantity Only	0.2
Plate 3	B06	6020_0016	GCATGTCAGGAGGAAGAAACATGTGCTTCAGCTTCCCGATATCCGACGGTAGTGTNNNNNNNNGTGAGGGTGATAAGCGAG	200 picomole Ultramer DNA Plate Oligo	Standard Desalting	Quantity Only	0.2
Plate 3	B07	6034_0214	GTCAGTGTGTGGTAACAATGATGCTGTATCTTCAGCTTCCCGATATCCGACGGTAGTGTNNNNNNNNCAAAATGGTGGGTTGC	200 picomole Ultramer DNA Plate Oligo	Standard Desalting	Quantity Only	0.2
Plate 3	B08	6095_0215	GTCGTTGCTAGCTGGATTAGAGCGCTTCAGCTTCCCGATATCCGACGGTAGTGTNNNNNNNNGGGGAAATGAGCGAATAGTG	200 picomole Ultramer DNA Plate Oligo	Standard Desalting	Quantity Only	0.2
Plate 3	B09	6144_0217	GAACAAAATAACCCATGTACTTCTCTCGGCTTCAGCTTCCCGATATCCGACGGTAGTGTNNNNNNNNAGGGGAAAGAAGATGT	200 picomole Ultramer DNA Plate Oligo	Standard Desalting	Quantity Only	0.2
Plate 3	B10	6145_0218	GGAAGACAAATGTCTGCTTCCTTCTCTCCTTCAGCTTCCCGATATCCGACGGTAGTGTNNNNNNNNAAGAGAGCGAATAAAGC	200 picomole Ultramer DNA Plate Oligo	Standard Desalting	Quantity Only	0.2
Plate 3	B11	6180_0219	CTAAGCTTGTCATCGGAGGGGTTCCTTCAGCTTCCCGATATCCGACGGTAGTGTNNNNNNNNTTGTTGGCAGTGATGACGCT	200 picomole Ultramer DNA Plate Oligo	Standard Desalting	Quantity Only	0.2
Plate 3	B12	6204_0220	GTGACCATTCTATCCATCGTTTGATGTCCCTTCAGCTTCCCGATATCCGACGGTAGTGTNNNNNNNNATCCCAACATACAGTC	200 picomole Ultramer DNA Plate Oligo	Standard Desalting	Quantity Only	0.2
Plate 3	C01	6226_0017	GCCGTCTTCGCTTGAGTGGCTTCAGCTTCCCGATATCCGACGGTAGTGTNNNNNNNNCATCAAACAAAACATGTCATTG	200 picomole Ultramer DNA Plate Oligo	Standard Desalting	Quantity Only	0.2
Plate 3	C02	6236_0221	CAAGACTTTCCTTTACAATGGCCTCCTTCAGCTTCCCGATATCCGACGGTAGTGTNNNNNNNNTTTTTGTGTGGTTTTCTGGC	200 picomole Ultramer DNA Plate Oligo	Standard Desalting	Quantity Only	0.2
Plate 3	C03	6238_0222	CTAACTTCACGAGATTCACCGTCAGACCCTTCAGCTTCCCGATATCCGACGGTAGTGTNNNNNNNNGGTAACTAGGCCGTAGT	200 picomole Ultramer DNA Plate Oligo	Standard Desalting	Quantity Only	0.2
Plate 3	C04	6330_0223	GTGGTGGAGGTTGCGGCGGTGGCTTCAGCTTCCCGATATCCGACGGTAGTGTNNNNNNNNTGAAAGCTATGGAGGGGA	200 picomole Ultramer DNA Plate Oligo	Standard Desalting	Quantity Only	0.2
Plate 3	C05	6339_0224	ATTTGACTTCGAGGGAGGCCTTGTTCTTGCTTCAGCTTCCCGATATCCGACGGTAGTGTNNNNNNNNCCTAAAAGAACCTGGA	200 picomole Ultramer DNA Plate Oligo	Standard Desalting	Quantity Only	0.2
Plate 3	C06	6396_0225	TTTCCGGCGAGATCCTCCGCCTTCCTTCAGCTTCCCGATATCCGACGGTAGTGTNNNNNNNNCGAAGAAGCGCCAATTGAT	200 picomole Ultramer DNA Plate Oligo	Standard Desalting	Quantity Only	0.2
Plate 3	C07	6431_0226	GCAACAACAGTTGCGGTATGAGCAGTAGCCTTCAGCTTCCCGATATCCGACGGTAGTGTNNNNNNNNCAAAAACAAAACACAG	200 picomole Ultramer DNA Plate Oligo	Standard Desalting	Quantity Only	0.2
Plate 3	C08	6456_0227	GAGAGGTCGTTGGGGAGATTGATTAGGCTTCAGCTTCCCGATATCCGACGGTAGTGTNNNNNNNNTGTTGTGAAGTGCGAG	200 picomole Ultramer DNA Plate Oligo	Standard Desalting	Quantity Only	0.2
Plate 3	C09	6461_0018	GCTCAAATCTTTAGATGAGGTTCGACAATCTTCAGCTTCCCGATATCCGACGGTAGTGTNNNNNNNNTCGTAAGATGACATAT	200 picomole Ultramer DNA Plate Oligo	Standard Desalting	Quantity Only	0.2
Plate 3	C10	6506_0228	GAACATCACACGTGGCCAGCGTAGTAGCTTCAGCTTCCCGATATCCGACGGTAGTGTNNNNNNNNGAAGGGAGATTATGTTCC	200 picomole Ultramer DNA Plate Oligo	Standard Desalting	Quantity Only	0.2
Plate 3	C11	6518_0229	CCACTCATCTCAATTTCAACCTCCTCTTCAGCTTCCCGATATCCGACGGTAGTGTNNNNNNNNCCAAAAACGTAAAAAAATAA	200 picomole Ultramer DNA Plate Oligo	Standard Desalting	Quantity Only	0.2
Plate 3	C12	6545_0230	TGAAGCCCCAACAAAGCATATCGCTTCAGCTTCCCGATATCCGACGGTAGTGTNNNNNNNNGGTACAGGACATGTTTATGAAG	200 picomole Ultramer DNA Plate Oligo	Standard Desalting	Quantity Only	0.2
Plate 3	D01	6582_0231	CGGCAAGACTTGACTAATGACAAAACCTTCAGCTTCCCGATATCCGACGGTAGTGTNNNNNNNNTGCTTTCGACTGGTCCTGC	200 picomole Ultramer DNA Plate Oligo	Standard Desalting	Quantity Only	0.2
Plate 3	D02	6610_0232	GCATTAGGGTTTTCATCACTGAACAATTGCTTCAGCTTCCCGATATCCGACGGTAGTGTNNNNNNNNCTAATACAATATCACC	200 picomole Ultramer DNA Plate Oligo	Standard Desalting	Quantity Only	0.2
Plate 3	D03	6686_0233	GCTATTGAATGAGATTGTCGTCACAGCTTCAGCTTCCCGATATCCGACGGTAGTGTNNNNNNNNCTTATAAATCTTCCTGCCG	200 picomole Ultramer DNA Plate Oligo	Standard Desalting	Quantity Only	0.2
Plate 3	D04	6770_0234	GCAGCTTACGGCGGATAAATATGAGCAGCCTTCAGCTTCCCGATATCCGACGGTAGTGTNNNNNNNNTGGAGAGGGTTTCGTT	200 picomole Ultramer DNA Plate Oligo	Standard Desalting	Quantity Only	0.2
Plate 3	D05	6782_0235	GGGCTGTTTCGTGGTTTACACGGTTGACTTCAGCTTCCCGATATCCGACGGTAGTGTNNNNNNNNAGTAAAGATGATCAACAC	200 picomole Ultramer DNA Plate Oligo	Standard Desalting	Quantity Only	0.2
Plate 3	D06	6801_0236	CAGGAGGTTCTTACAACGCCGCATAATCTCTTCAGCTTCCCGATATCCGACGGTAGTGTNNNNNNNNTGTTCTGTTTCTTCTT	200 picomole Ultramer DNA Plate Oligo	Standard Desalting	Quantity Only	0.2
Plate 3	D07	6815_0237	GCGTCGTTGACTAGCCTCCAAATGAGGGCTTCAGCTTCCCGATATCCGACGGTAGTGTNNNNNNNNGAAATAAAATCAAAGAA	200 picomole Ultramer DNA Plate Oligo	Standard Desalting	Quantity Only	0.2
Plate 3	D08	6864_0238	CGAGAGAGAGGGTTTTAGGGTTTCTCTTCAGCTTCCCGATATCCGACGGTAGTGTNNNNNNNNCGAGGATTGGATTTGGAAG	200 picomole Ultramer DNA Plate Oligo	Standard Desalting	Quantity Only	0.2
Plate 3	D09	6882_0239	CGGGCAGTGCTAGTAGTAGTAACAATGATCTTCAGCTTCCCGATATCCGACGGTAGTGTNNNNNNNNAATGAAGGTGAAGAGG	200 picomole Ultramer DNA Plate Oligo	Standard Desalting	Quantity Only	0.2
Plate 3	D10	6934_0240	CGTACGATCGTAGCTTCACAAATCAGACGCTTCAGCTTCCCGATATCCGACGGTAGTGTNNNNNNNNTGAAGACGAAGAAGAG	200 picomole Ultramer DNA Plate Oligo	Standard Desalting	Quantity Only	0.2
Plate 3	D11	6983_0019	CAGTCTTTTCTTTTCAATTGAGTTCCTTCAGCTTCCCGATATCCGACGGTAGTGTNNNNNNNNGTTGGGGGATTCGTTGG	200 picomole Ultramer DNA Plate Oligo	Standard Desalting	Quantity Only	0.2
Plate 3	D12	7048_0242	CAAATCCCTTATATTACATACATATGCTTCAGCTTCCCGATATCCGACGGTAGTGTNNNNNNNNGTTTTGCTAGCCATCACCT	200 picomole Ultramer DNA Plate Oligo	Standard Desalting	Quantity Only	0.2
Plate 3	E01	7071_0243	GAAGAAACCGAAGAAGTGGTTATGAGTGCTTCAGCTTCCCGATATCCGACGGTAGTGTNNNNNNNNGCCGATGGAAAAGTTAG	200 picomole Ultramer DNA Plate Oligo	Standard Desalting	Quantity Only	0.2
Plate 3	E02	7086_0020	GTGTTCCCATTCCTTTTCAAGTTGTGCTTCAGCTTCCCGATATCCGACGGTAGTGTNNNNNNNNAGACCAAAAACATAAGAG	200 picomole Ultramer DNA Plate Oligo	Standard Desalting	Quantity Only	0.2
Plate 3	E03	7150_0245	AAGGACTCCGCCTACCATTACAACCTTCAGCTTCCCGATATCCGACGGTAGTGTNNNNNNNNGTCGTTGACGGGGAAA	200 picomole Ultramer DNA Plate Oligo	Standard Desalting	Quantity Only	0.2
Plate 3	E04	7168_0246	GCGACATGGGAACACATGAGACGAAGTAACTTCAGCTTCCCGATATCCGACGGTAGTGTNNNNNNNNGAAGCTAGCAGAGCAG	200 picomole Ultramer DNA Plate Oligo	Standard Desalting	Quantity Only	0.2
Plate 3	E05	7172_0247	TCTTTCGCAGGAAGATATCGTCGAGCGCTTCAGCTTCCCGATATCCGACGGTAGTGTNNNNNNNNGTTAGACACGGATCTGTG	200 picomole Ultramer DNA Plate Oligo	Standard Desalting	Quantity Only	0.2
Plate 3	E06	7358_0249	CAGCAATATTGAAGACGTCCTGTTCGCTTCAGCTTCCCGATATCCGACGGTAGTGTNNNNNNNNTCTTTTTCTAGGCCGGTCG	200 picomole Ultramer DNA Plate Oligo	Standard Desalting	Quantity Only	0.2
Plate 3	E07	7492_0250	GGAATCTCAACATTCCAAATCTTCGCCGGCTTCAGCTTCCCGATATCCGACGGTAGTGTNNNNNNNNACGGGAAAACAGAAAA	200 picomole Ultramer DNA Plate Oligo	Standard Desalting	Quantity Only	0.2
Plate 3	E08	7555_0251	GCGTTCATATGTTAGTCTCATCGATTTCTTCAGCTTCCCGATATCCGACGGTAGTGTNNNNNNNNTTCTCTTCTCTCTCAC	200 picomole Ultramer DNA Plate Oligo	Standard Desalting	Quantity Only	0.2
Plate 3	E09	7556_0252_SNP_a	GCATAACCCACTTGTTCATAAGGATATTCCTTCAGCTTCCCGATATCCGACGGTAGTGTNNNNNNNNTGAAACACATCACACA	200 picomole Ultramer DNA Plate Oligo	Standard Desalting	Quantity Only	0.2
Plate 3	E10	7564_0253	GGTTGGTGGCTGGTGGTAGTTGCTTCAGCTTCCCGATATCCGACGGTAGTGTNNNNNNNNACTAATTGAAAAGGAAAAG	200 picomole Ultramer DNA Plate Oligo	Standard Desalting	Quantity Only	0.2
Plate 3	E11	7618_0254	GCTAATGGCGGAGGGATGCTTCTAGACTTCAGCTTCCCGATATCCGACGGTAGTGTNNNNNNNNTGGAGGTGGAGGTGGT	200 picomole Ultramer DNA Plate Oligo	Standard Desalting	Quantity Only	0.2
Plate 3	E12	7653_0255	GCAAAAGCAGGTTGATCCTGAAGAGGACCTTCAGCTTCCCGATATCCGACGGTAGTGTNNNNNNNNTCAAAGATGGCAGGAA	200 picomole Ultramer DNA Plate Oligo	Standard Desalting	Quantity Only	0.2
Plate 3	F01	7959_0256	CGTCGTTGAGATTGAAAGATCATGTTCGGCTTCAGCTTCCCGATATCCGACGGTAGTGTNNNNNNNNCATCGATTAACGACAA	200 picomole Ultramer DNA Plate Oligo	Standard Desalting	Quantity Only	0.2
Plate 3	F02	7966_0258	AGATACAAGGATTACACATATACAAACTCCTTCAGCTTCCCGATATCCGACGGTAGTGTNNNNNNNNCGGTGATCGATCTTCT	200 picomole Ultramer DNA Plate Oligo	Standard Desalting	Quantity Only	0.2
Plate 3	F03	8044_0021	ACTTGTGGAAACGAGAGAGAGAGTGTTTCCTTCAGCTTCCCGATATCCGACGGTAGTGTNNNNNNNNAACGAAGAACTCAAGA	200 picomole Ultramer DNA Plate Oligo	Standard Desalting	Quantity Only	0.2
Plate 3	F04	8067_0259	CCATTACTTGACTGAACTTATTTGGGCCCCTTCAGCTTCCCGATATCCGACGGTAGTGTNNNNNNNNTGATCGGTGGTGGTGG	200 picomole Ultramer DNA Plate Oligo	Standard Desalting	Quantity Only	0.2
Plate 3	F05	8109_0260	GAGAACAAAGATTACGGAGGTGAGTTCTTCAGCTTCCCGATATCCGACGGTAGTGTNNNNNNNNGAAGAGACATCAAACAAA	200 picomole Ultramer DNA Plate Oligo	Standard Desalting	Quantity Only	0.2
Plate 3	F06	8114_0261	GTGGTTATGTTGAGAACTTTGTGCGGCTTCAGCTTCCCGATATCCGACGGTAGTGTNNNNNNNNCGAATGAAGAACAGAG	200 picomole Ultramer DNA Plate Oligo	Standard Desalting	Quantity Only	0.2
Plate 3	F07	8116_0022_SNP_a	CTTATGTTATTGTGTTCTTGTAGATTTACCTTCAGCTTCCCGATATCCGACGGTAGTGTNNNNNNNNCCACCAATATGGTCCC	200 picomole Ultramer DNA Plate Oligo	Standard Desalting	Quantity Only	0.2
Plate 3	F08	8208_0262	GGATTCGTTGAGAAACCAAACTAGTAATGCTTCAGCTTCCCGATATCCGACGGTAGTGTNNNNNNNNAGGAAGAAAAGGAGAG	200 picomole Ultramer DNA Plate Oligo	Standard Desalting	Quantity Only	0.2
Plate 3	F09	8217_0263	GGGCCACACTGCTACTGGTACTGGACCTTCAGCTTCCCGATATCCGACGGTAGTGTNNNNNNNNAACGGAGAAGGCTTTCTAT	200 picomole Ultramer DNA Plate Oligo	Standard Desalting	Quantity Only	0.2
Plate 3	F10	8366_0264	CCAAACGAATTATTCCTCTGATGCTTCAGCTTCCCGATATCCGACGGTAGTGTNNNNNNNNGTACTCTCTTTTTTCATTGTAC	200 picomole Ultramer DNA Plate Oligo	Standard Desalting	Quantity Only	0.2
Plate 3	F11	8420_0265	GCATAACCAATGGAATGAGGTGGAAGAGTCTTCAGCTTCCCGATATCCGACGGTAGTGTNNNNNNNNCTCACTAACGTGAATC	200 picomole Ultramer DNA Plate Oligo	Standard Desalting	Quantity Only	0.2
Plate 3	F12	8469_0266	TGAGATTTTCTTACAGTGATTCCCAGCTTCAGCTTCCCGATATCCGACGGTAGTGTNNNNNNNNCCTCATGGTTATTAACAAG	200 picomole Ultramer DNA Plate Oligo	Standard Desalting	Quantity Only	0.2
Plate 3	G01	8475_0267	TGTGTGTGCTTCGTCTTTTTTCTCTCCCTTCAGCTTCCCGATATCCGACGGTAGTGTNNNNNNNNTGTCCCCATGTGCTCT	200 picomole Ultramer DNA Plate Oligo	Standard Desalting	Quantity Only	0.2
Plate 3	G02	8489_0268_SNP_a	GTTTGGGTTTGATGGGCAAATCTGTTTCTTCAGCTTCCCGATATCCGACGGTAGTGTNNNNNNNNAACCTGCACGTCAAGAAA	200 picomole Ultramer DNA Plate Oligo	Standard Desalting	Quantity Only	0.2
Plate 3	G03	8745_0269	GCTGATCCCATCTAGGGGCCAAGCCTCTCTTCAGCTTCCCGATATCCGACGGTAGTGTNNNNNNNNTCTGTCTCTATCCTCTG	200 picomole Ultramer DNA Plate Oligo	Standard Desalting	Quantity Only	0.2
Plate 3	G04	8749_0270_SNP_a	TCTGCCGCCGGCATTCTCTCCGGTACGTCCTTCAGCTTCCCGATATCCGACGGTAGTGTNNNNNNNNAAAAACTGTAAAAACA	200 picomole Ultramer DNA Plate Oligo	Standard Desalting	Quantity Only	0.2
Plate 3	G05	8820_0271	GAAAACGGATGTGGATTTGGAGCTGTGGCTTCAGCTTCCCGATATCCGACGGTAGTGTNNNNNNNNACAACAAATCTATGGTG	200 picomole Ultramer DNA Plate Oligo	Standard Desalting	Quantity Only	0.2
Plate 3	G06	8893_0272	CGACTTGACTTCGAGTCTTCCTTCAGCTTCCCGATATCCGACGGTAGTGTNNNNNNNNCTTCCTCTTTTGCTTCCGTGG	200 picomole Ultramer DNA Plate Oligo	Standard Desalting	Quantity Only	0.2
Plate 3	G07	8921_0273	CGGCTCCGTTATTTACGCCTCCGGTCTTCAGCTTCCCGATATCCGACGGTAGTGTNNNNNNNNGAGAAAAAGAGTCTTCATTG	200 picomole Ultramer DNA Plate Oligo	Standard Desalting	Quantity Only	0.2
Plate 3	G08	9041_0274_SNP_a	AAGGCTCCTCCGGCTTCTCCTTCAGCTTCCCGATATCCGACGGTAGTGTNNNNNNNNTGGATGTTGAGACTTTCTATGATGGT	200 picomole Ultramer DNA Plate Oligo	Standard Desalting	Quantity Only	0.2
Plate 3	G09	9042_0275	CGAAGAGCAGGCGGAGTTTGCCAACTTCAGCTTCCCGATATCCGACGGTAGTGTNNNNNNNNGGAAGATCGTGTTTTTGTGGG	200 picomole Ultramer DNA Plate Oligo	Standard Desalting	Quantity Only	0.2
Plate 3	G10	9046_0276	CGATTATCTCAGGAATTTGGTAAAAGTTCTTCAGCTTCCCGATATCCGACGGTAGTGTNNNNNNNNTCTTCCACGATCCTTA	200 picomole Ultramer DNA Plate Oligo	Standard Desalting	Quantity Only	0.2
Plate 3	G11	9230_0277_SNP_a	ATTTTATTTATGGGAATGTTACACGTTTCTTCAGCTTCCCGATATCCGACGGTAGTGTNNNNNNNNACCAAATTCCTGAGATA	200 picomole Ultramer DNA Plate Oligo	Standard Desalting	Quantity Only	0.2
Plate 3	G12	9267_0278	GTGCATGGAAAAGCAATGCGCATGAGATACTTCAGCTTCCCGATATCCGACGGTAGTGTNNNNNNNNCCTGGTTGTTTAGCTT	200 picomole Ultramer DNA Plate Oligo	Standard Desalting	Quantity Only	0.2
Plate 3	H01	9709_0279	ACATCACTTATTATTACCGTAACAATTATCTTCAGCTTCCCGATATCCGACGGTAGTGTNNNNNNNNAGTTTCTTTGTGTTCA	200 picomole Ultramer DNA Plate Oligo	Standard Desalting	Quantity Only	0.2
Plate 3	H02	9836_0025	GGAGCCGCAGAGAAAACCGACTGGTTCTTCAGCTTCCCGATATCCGACGGTAGTGTNNNNNNNNAAAAAAGCTTCAAGCAAA	200 picomole Ultramer DNA Plate Oligo	Standard Desalting	Quantity Only	0.2
Plate 3	H03	9885_0280	GAGTGTACGTACGGAGGCTGTGTGTAGTGCTTCAGCTTCCCGATATCCGACGGTAGTGTNNNNNNNNAACATGAAAACAGAGT	200 picomole Ultramer DNA Plate Oligo	Standard Desalting	Quantity Only	0.2
Plate 3	H04	10007_0026_SNP_a	CAAATAGAACACACATTATAAGGAACGAACTTCAGCTTCCCGATATCCGACGGTAGTGTNNNNNNNNCAGAGACTAAGAAGTG	200 picomole Ultramer DNA Plate Oligo	Standard Desalting	Quantity Only	0.2
Plate 3	H05	10138_0281	CACTCTCTCCAAGATCTATTCACGCATCGCTTCAGCTTCCCGATATCCGACGGTAGTGTNNNNNNNNAACGACGTCGTTTACT	200 picomole Ultramer DNA Plate Oligo	Standard Desalting	Quantity Only	0.2
Plate 3	H06	10200_0283	GCTGCATATTCTACGGCAGGTTCTTCAGCTTCCCGATATCCGACGGTAGTGTNNNNNNNNTTCCACTGTTTGTACCAACTGAC	200 picomole Ultramer DNA Plate Oligo	Standard Desalting	Quantity Only	0.2
Plate 3	H07	10360_0284	CCAGAAAACTTTTGGCCTTGCTCTACGCTTCAGCTTCCCGATATCCGACGGTAGTGTNNNNNNNNGACCAAGTAATAGTTGAG	200 picomole Ultramer DNA Plate Oligo	Standard Desalting	Quantity Only	0.2
Plate 3	H08	10688_0285_SNP_a	CGGTTCACCAAAAATCGGTGGTACCGACTTCAGCTTCCCGATATCCGACGGTAGTGTNNNNNNNNGATCCTTACACAAGAAAT	200 picomole Ultramer DNA Plate Oligo	Standard Desalting	Quantity Only	0.2
Plate 3	H09	10873_0286	AAACAGAGTGTTCGTATAGTTGCAGTGCTTCAGCTTCCCGATATCCGACGGTAGTGTNNNNNNNNCATATAGAATTGACGTTG	200 picomole Ultramer DNA Plate Oligo	Standard Desalting	Quantity Only	0.2
Plate 3	H10	10969_0287	ACCCAGCCGAGTGATCTAAGGAACTGTGCCTTCAGCTTCCCGATATCCGACGGTAGTGTNNNNNNNNCAAACAAAACAAAGAA	200 picomole Ultramer DNA Plate Oligo	Standard Desalting	Quantity Only	0.2
Plate 3	H11	11052_0027	GAGACCATGCGATGAAAGCCTGATGGATCTTCAGCTTCCCGATATCCGACGGTAGTGTNNNNNNNNTAAGTCTGGGGGATAG	200 picomole Ultramer DNA Plate Oligo	Standard Desalting	Quantity Only	0.2
Plate 3	H12	11277_0020	TACAATGGTTGAGGTGGTGTTACCTCCTTCAGCTTCCCGATATCCGACGGTAGTGTNNNNNNNNATAAGAAAATAGAACACAA	200 picomole Ultramer DNA Plate Oligo	Standard Desalting	Quantity Only	0.2
Plate 4	A01	11616_0029	GGGATTGGAGCATTTTTCCGGGACTTCTTCAGCTTCCCGATATCCGACGGTAGTGTNNNNNNNNGACATGGAGAATGGAAAG	200 picomole Ultramer DNA Plate Oligo	Standard Desalting	Quantity Only	0.2
Plate 4	A02	13257_0290	GAGAGAGAGAGTCACAATTCGATTGTGCTTCAGCTTCCCGATATCCGACGGTAGTGTNNNNNNNNAAGTTAATAGAATTACA	200 picomole Ultramer DNA Plate Oligo	Standard Desalting	Quantity Only	0.2
Plate 4	A03	13585_0294	CCCACTGAAAAATTTCTCTTCCCACTCTTCAGCTTCCCGATATCCGACGGTAGTGTNNNNNNNNGGTTATCGGGTTAGGCG	200 picomole Ultramer DNA Plate Oligo	Standard Desalting	Quantity Only	0.2
Plate 4	A04	13692_0295_SNP_a	GATCATTAGAGCTGTGTGTTTTACCTTCAGCTTCCCGATATCCGACGGTAGTGTNNNNNNNNCTCTCATTCAATTTTCCACCG	200 picomole Ultramer DNA Plate Oligo	Standard Desalting	Quantity Only	0.2
Plate 4	A05	13704_0296	GCAGCATTGAGGTTTATGGAGAAAGCTTCAGCTTCCCGATATCCGACGGTAGTGTNNNNNNNNCAGCGGAACAAAGTTTTCTG	200 picomole Ultramer DNA Plate Oligo	Standard Desalting	Quantity Only	0.2
Plate 4	A06	13705_0297_SNP_a	GCTGAGGGTTTATTTGGGGTTTGCTTCAGCTTCCCGATATCCGACGGTAGTGTNNNNNNNNTGAGGTTTCTGGTAAAGG	200 picomole Ultramer DNA Plate Oligo	Standard Desalting	Quantity Only	0.2
Plate 4	A07	13738_0031	TTGACACTCGTCGGAGTATAGTCGTCTCCTTCAGCTTCCCGATATCCGACGGTAGTGTNNNNNNNNGACAGATGAAATGTTAG	200 picomole Ultramer DNA Plate Oligo	Standard Desalting	Quantity Only	0.2
Plate 4	A08	14102_0300	CAACTTTGTTGTACTAGTTTTGTTATGCCCTTCAGCTTCCCGATATCCGACGGTAGTGTNNNNNNNNCAATCCACAAGTGTTG	200 picomole Ultramer DNA Plate Oligo	Standard Desalting	Quantity Only	0.2
Plate 4	A09	14368_0301	GCAGCGTGGTTTTGTAATCTCTTGCTTCAGCTTCCCGATATCCGACGGTAGTGTNNNNNNNNCTTGAATCAGTTTCTTCGAGT	200 picomole Ultramer DNA Plate Oligo	Standard Desalting	Quantity Only	0.2
Plate 4	A10	14721_0302	GCTGGCTTGCTGAGGAGAAGGCTTCAGCTTCCCGATATCCGACGGTAGTGTNNNNNNNNACCATTGCTTGGATTACCCTGCA	200 picomole Ultramer DNA Plate Oligo	Standard Desalting	Quantity Only	0.2
Plate 4	A11	14795_0027	CTAACAAGCTCTATATGGCCTCTTCAGCTTCCCGATATCCGACGGTAGTGTNNNNNNNNCCTGAAAAGTTGTTAAATGGTTTC	200 picomole Ultramer DNA Plate Oligo	Standard Desalting	Quantity Only	0.2
Plate 4	A12	14840_0306	GTTGCGGGGTGGGCCAGAAGACTTCAGCTTCCCGATATCCGACGGTAGTGTNNNNNNNNGGAGGTGGATTCAGAGTTG	200 picomole Ultramer DNA Plate Oligo	Standard Desalting	Quantity Only	0.2
Plate 4	B01	15071_0307_SNP_a	TTGGTGTTCTTCGAGCTTGAAGGTGCGGTCTTCAGCTTCCCGATATCCGACGGTAGTGTNNNNNNNNTTGAATGTAAAATACA	200 picomole Ultramer DNA Plate Oligo	Standard Desalting	Quantity Only	0.2
Plate 4	B02	15249_0308_SNP_a	CAGGCAAAGAAAACTCAACACCATCCTTCAGCTTCCCGATATCCGACGGTAGTGTNNNNNNNNAAAGAACAATATCAAAAGA	200 picomole Ultramer DNA Plate Oligo	Standard Desalting	Quantity Only	0.2
Plate 4	B03	15383_0310	GCTGCAACAAAAGGACACACCAAGGATTGCTTCAGCTTCCCGATATCCGACGGTAGTGTNNNNNNNNACATTCTTGAGAATGG	200 picomole Ultramer DNA Plate Oligo	Standard Desalting	Quantity Only	0.2
Plate 4	B04	15746_0312	CGAACAGGATGGTTAGAGACATCTTGGATCTTCAGCTTCCCGATATCCGACGGTAGTGTNNNNNNNNAAACAAAACAGAGTAA	200 picomole Ultramer DNA Plate Oligo	Standard Desalting	Quantity Only	0.2
Plate 4	B05	15994_0313	GCCGTTGAAATTGTGTGCCTTGTGGCTTCAGCTTCCCGATATCCGACGGTAGTGTNNNNNNNNACCTGCTGCTATCCAACTAA	200 picomole Ultramer DNA Plate Oligo	Standard Desalting	Quantity Only	0.2
Plate 4	B06	16109_0314	GCCACTGAGTCTGCGCATTGTTTAGCTTCAGCTTCCCGATATCCGACGGTAGTGTNNNNNNNNTGATCAGGTGGATTGGCCGT	200 picomole Ultramer DNA Plate Oligo	Standard Desalting	Quantity Only	0.2
Plate 4	B07	16130_0315	CGCCACTATCTCTTTGCTTCCTCCTTCTCCTTCAGCTTCCCGATATCCGACGGTAGTGTNNNNNNNNCCGGATAAAACAGAGA	200 picomole Ultramer DNA Plate Oligo	Standard Desalting	Quantity Only	0.2
Plate 4	B08	16194_0317	CATCAGAATAATCATAATCGTTAGTTGACCTTCAGCTTCCCGATATCCGACGGTAGTGTNNNNNNNNGGCGCCTTTGGTTCTA	200 picomole Ultramer DNA Plate Oligo	Standard Desalting	Quantity Only	0.2
Plate 4	B09	16201_0318	GAAGGAAGCGGACGAAGATGAGAAGCCCCTTCAGCTTCCCGATATCCGACGGTAGTGTNNNNNNNNATTAGGAAGACCAGGA	200 picomole Ultramer DNA Plate Oligo	Standard Desalting	Quantity Only	0.2
Plate 4	B10	16238_0319	GCGGTGAAGCGAGGAGGCGATGAGAGACTTCAGCTTCCCGATATCCGACGGTAGTGTNNNNNNNNAAGCCGATAAGTGAACTT	200 picomole Ultramer DNA Plate Oligo	Standard Desalting	Quantity Only	0.2
Plate 4	B11	16243_0320_SNP_a	GTGATGGTGGGTTTGGGCCTTCAGCTTCCCGATATCCGACGGTAGTGTNNNNNNNNGATTGGTGGATCTTCCTCTTTG	200 picomole Ultramer DNA Plate Oligo	Standard Desalting	Quantity Only	0.2
Plate 4	B12	16245_0321	CCACTGGTCTTCAAAGTCTTGAGATGGTGCTTCAGCTTCCCGATATCCGACGGTAGTGTNNNNNNNNAGAAGAAGCCAAAACC	200 picomole Ultramer DNA Plate Oligo	Standard Desalting	Quantity Only	0.2
Plate 4	C01	16305_0322	GTGATGGAGTGAAAAATCAGTTTGTGTTCCTTCAGCTTCCCGATATCCGACGGTAGTGTNNNNNNNNAGAGCTCGAGGATAGA	200 picomole Ultramer DNA Plate Oligo	Standard Desalting	Quantity Only	0.2
Plate 4	C02	16307_0323	CTACCATCTCCTCCTCCTTCTTCTTCCTTCAGCTTCCCGATATCCGACGGTAGTGTNNNNNNNNTCTCTCTCTCTCGAAGCTC	200 picomole Ultramer DNA Plate Oligo	Standard Desalting	Quantity Only	0.2
Plate 4	C03	16640_0324	ATCTGCTTTCATTATTCTTTGGTACAGTCTTCAGCTTCCCGATATCCGACGGTAGTGTNNNNNNNNGATTAAATGTGTGTGTG	200 picomole Ultramer DNA Plate Oligo	Standard Desalting	Quantity Only	0.2
Plate 4	C04	16646_0326_SNP_a	GCTTAGTAAGTAGAGAGTTCTTTAAGCTCTTCAGCTTCCCGATATCCGACGGTAGTGTNNNNNNNNGCGTAGGTTGTCGTTTG	200 picomole Ultramer DNA Plate Oligo	Standard Desalting	Quantity Only	0.2
Plate 4	C05	16666_0327	GGTGGTTTGCATTTGCGTGAAAAAGATTCCTTCAGCTTCCCGATATCCGACGGTAGTGTNNNNNNNNGAAGATTGGAGCAGAA	200 picomole Ultramer DNA Plate Oligo	Standard Desalting	Quantity Only	0.2
Plate 4	C06	16741_0328	CGTTGTCGTTTGAAAACCGGGCTGCCTTCAGCTTCCCGATATCCGACGGTAGTGTNNNNNNNNGTCTTTGGAGGAAGGA	200 picomole Ultramer DNA Plate Oligo	Standard Desalting	Quantity Only	0.2
Plate 4	C07	16743_0329	CGAAAAGTGTGTATCTGATAGATTGGACTTCAGCTTCCCGATATCCGACGGTAGTGTNNNNNNNNAGCAGAACTTAGCCGA	200 picomole Ultramer DNA Plate Oligo	Standard Desalting	Quantity Only	0.2
Plate 4	C08	16760_0330	CCAAATTTGGGTTGTGAAGCCTGAGGCTTCAGCTTCCCGATATCCGACGGTAGTGTNNNNNNNNGTTGAATTCCTGCTAGTAC	200 picomole Ultramer DNA Plate Oligo	Standard Desalting	Quantity Only	0.2
Plate 4	C09	16782_0331	TTTGACCCACCGCATCCCCTTCAGCTTCCCGATATCCGACGGTAGTGTNNNNNNNNGCTTCAAGCAAAGGTCTGCCTTTACG	200 picomole Ultramer DNA Plate Oligo	Standard Desalting	Quantity Only	0.2
Plate 4	C10	16815_0332	TACCTTCTCGATATCCTCTATGTCGGCCCTTCAGCTTCCCGATATCCGACGGTAGTGTNNNNNNNNCATACAAAATAAATAG	200 picomole Ultramer DNA Plate Oligo	Standard Desalting	Quantity Only	0.2
Plate 4	C11	16893_0333	GTGAATTCTCACTCCATAAAATGGGTATGCTTCAGCTTCCCGATATCCGACGGTAGTGTNNNNNNNNAATAGTAGGAACAAAA	200 picomole Ultramer DNA Plate Oligo	Standard Desalting	Quantity Only	0.2
Plate 4	C12	16894_0334	GTGGACTGGTATGCTTGACTTGGTGCTTCAGCTTCCCGATATCCGACGGTAGTGTNNNNNNNNTCAAACTCAACACAGAA	200 picomole Ultramer DNA Plate Oligo	Standard Desalting	Quantity Only	0.2
Plate 4	D01	16984_0335	GCGAGTCGACGTGTAGTTTCGATTCGGAACTTCAGCTTCCCGATATCCGACGGTAGTGTNNNNNNNNATAGAAGAAACAGAGA	200 picomole Ultramer DNA Plate Oligo	Standard Desalting	Quantity Only	0.2
Plate 4	D02	17029_0336_SNP_a	CCCACCGTTGTTCTTAGGGTTTTGATCCTTCAGCTTCCCGATATCCGACGGTAGTGTNNNNNNNNGAAAATAGGGTTTTGATC	200 picomole Ultramer DNA Plate Oligo	Standard Desalting	Quantity Only	0.2
Plate 4	D03	17063_0337	GTTTGGCTCGAAGAGAAATGACTCGATTTCTTCAGCTTCCCGATATCCGACGGTAGTGTNNNNNNNNCGAGACGAAGAAGAAG	200 picomole Ultramer DNA Plate Oligo	Standard Desalting	Quantity Only	0.2
Plate 4	D04	17128_0338	GCTTCTGAGGTGGTTGAGGCTGGGGTCTTCAGCTTCCCGATATCCGACGGTAGTGTNNNNNNNNTGGTACTGTTGGGCCTCG	200 picomole Ultramer DNA Plate Oligo	Standard Desalting	Quantity Only	0.2
Plate 4	D05	17213_0339_SNP_a	GTGTGTGTGTGATCTTTGGTTTGTGGCTTCAGCTTCCCGATATCCGACGGTAGTGTNNNNNNNNCTTTGAGAATTTCTTCAAG	200 picomole Ultramer DNA Plate Oligo	Standard Desalting	Quantity Only	0.2
Plate 4	D06	17285_0341	CTTGGCGTGGGAAGATTTGACGGTGGTCTTCAGCTTCCCGATATCCGACGGTAGTGTNNNNNNNNAGACGAAGAACAAACA	200 picomole Ultramer DNA Plate Oligo	Standard Desalting	Quantity Only	0.2
Plate 4	D07	17293_0342	CAGAAAAAAACATGATCATCCAACATCACCTTCAGCTTCCCGATATCCGACGGTAGTGTNNNNNNNNATCTTCTTCCTCTTGG	200 picomole Ultramer DNA Plate Oligo	Standard Desalting	Quantity Only	0.2
Plate 4	D08	17425_0343	GCAATGCTAATTTTCCAACGAATCCCCCCTTCAGCTTCCCGATATCCGACGGTAGTGTNNNNNNNNAAAAATAAACTCAATTG	200 picomole Ultramer DNA Plate Oligo	Standard Desalting	Quantity Only	0.2
Plate 4	D09	17595_0344	CCGTAACCAAGCCGGACTGACAGCTTCAGCTTCCCGATATCCGACGGTAGTGTNNNNNNNNGAGTAAACAACTGTTCATCG	200 picomole Ultramer DNA Plate Oligo	Standard Desalting	Quantity Only	0.2
Plate 4	D10	17603_0346	CTGTTGTATTTGTCTTCAGGCGGAATGTGCTTCAGCTTCCCGATATCCGACGGTAGTGTNNNNNNNNGGATTCACAAATCACA	200 picomole Ultramer DNA Plate Oligo	Standard Desalting	Quantity Only	0.2
Plate 4	D11	17631_0347	GGAAATAGGACGACGATTGAAGATCATCCTTCAGCTTCCCGATATCCGACGGTAGTGTNNNNNNNNGTGGTGGTCATGCTGGT	200 picomole Ultramer DNA Plate Oligo	Standard Desalting	Quantity Only	0.2
Plate 4	D12	17642_0348	GGTGACCAGCGGTGGCTTCCACATCTGCTTCAGCTTCCCGATATCCGACGGTAGTGTNNNNNNNNGTTATTTGTGGAGGGATG	200 picomole Ultramer DNA Plate Oligo	Standard Desalting	Quantity Only	0.2
Plate 4	E01	17835_0350	TGGTCGATCATAATTCGTCTTGCTCTGCTTCAGCTTCCCGATATCCGACGGTAGTGTNNNNNNNNACTCCATACAGAGATCAT	200 picomole Ultramer DNA Plate Oligo	Standard Desalting	Quantity Only	0.2
Plate 4	E02	17871_0351	GTTTGTTTGTTTTTGTGAAAAGAAAGATGCTTCAGCTTCCCGATATCCGACGGTAGTGTNNNNNNNNAAAATGGCTCAGAGTG	200 picomole Ultramer DNA Plate Oligo	Standard Desalting	Quantity Only	0.2
Plate 4	E03	17887_0033	GCGATGTAACAGATACACAACCAATGCTTCAGCTTCCCGATATCCGACGGTAGTGTNNNNNNNNCTAATAATGGAGATTGGAG	200 picomole Ultramer DNA Plate Oligo	Standard Desalting	Quantity Only	0.2
Plate 4	E04	17922_0038	GCCTTCGGCTAAAACGCGGCTTCGGTAACTTCAGCTTCCCGATATCCGACGGTAGTGTNNNNNNNNGAGAGGATTTACAACCA	200 picomole Ultramer DNA Plate Oligo	Standard Desalting	Quantity Only	0.2
Plate 4	E05	17965_0355	ACAGAGGAAGCAAGAAGAGAGAGAAGAGCTTCAGCTTCCCGATATCCGACGGTAGTGTNNNNNNNNACACGCCAACAAATCAA	200 picomole Ultramer DNA Plate Oligo	Standard Desalting	Quantity Only	0.2
Plate 4	E06	17970_0356	GGAAGATGAAGAACACTAATGGGCCCTTCAGCTTCCCGATATCCGACGGTAGTGTNNNNNNNNCACGGAGACGAACAGGAGA	200 picomole Ultramer DNA Plate Oligo	Standard Desalting	Quantity Only	0.2
Plate 4	E07	18083_0357	GTATTTGGATTAGGTTAAGGACTTTGGGCTTCAGCTTCCCGATATCCGACGGTAGTGTNNNNNNNNTGACACCAAAAAAAGGA	200 picomole Ultramer DNA Plate Oligo	Standard Desalting	Quantity Only	0.2
Plate 4	E08	18092_0039	GCATGTGCTTGTGTATAACCGGGCTTCAGCTTCCCGATATCCGACGGTAGTGTNNNNNNNNCATCGGTGCATGGAAACG	200 picomole Ultramer DNA Plate Oligo	Standard Desalting	Quantity Only	0.2
Plate 4	E09	18144_0040_SNP_a	TGAGAACACAACTTCGAGAAGATATAGCCCTTCAGCTTCCCGATATCCGACGGTAGTGTNNNNNNNNGAAGCAAAGAACAGAA	200 picomole Ultramer DNA Plate Oligo	Standard Desalting	Quantity Only	0.2
Plate 4	E10	18207_0358	GGAGATTCTGTGTTTGATGGCGGCTTCAGCTTCCCGATATCCGACGGTAGTGTNNNNNNNNCCATGACGAACGAAACAAA	200 picomole Ultramer DNA Plate Oligo	Standard Desalting	Quantity Only	0.2
Plate 4	E11	18293_0359	CTTTGGTGCTTTGGATTTGGTAAGAAGCTTCAGCTTCCCGATATCCGACGGTAGTGTNNNNNNNNAAACAGAGAAACCAACC	200 picomole Ultramer DNA Plate Oligo	Standard Desalting	Quantity Only	0.2
Plate 4	E12	18327_0360	GACATCACGACCAGTTCCATCATGTTCATCTTCAGCTTCCCGATATCCGACGGTAGTGTNNNNNNNNTAACCACAAGAACAAC	200 picomole Ultramer DNA Plate Oligo	Standard Desalting	Quantity Only	0.2
Plate 4	F01	18328_0041	GCAAGTTCTTGAGCCTCTTTTGCTTGGCTTCAGCTTCCCGATATCCGACGGTAGTGTNNNNNNNNGGAACAAAGCAAAAGG	200 picomole Ultramer DNA Plate Oligo	Standard Desalting	Quantity Only	0.2
Plate 4	F02	18331_0361	CGTTTGAGGGAAGCTCCTCAACAACCACCTTCAGCTTCCCGATATCCGACGGTAGTGTNNNNNNNNGTTCGATAGAGTTGATG	200 picomole Ultramer DNA Plate Oligo	Standard Desalting	Quantity Only	0.2
Plate 4	F03	18332_0362	GGAGGGAGAAGAAGAAGGAAGAGAAGGCTTCAGCTTCCCGATATCCGACGGTAGTGTNNNNNNNNGATCAACACGAAGAAA	200 picomole Ultramer DNA Plate Oligo	Standard Desalting	Quantity Only	0.2
Plate 4	F04	18380_0363	GGGATCACCATCGTTGACTCAAAAGCCGCTTCAGCTTCCCGATATCCGACGGTAGTGTNNNNNNNNCAGGTAAAAGAAGAGG	200 picomole Ultramer DNA Plate Oligo	Standard Desalting	Quantity Only	0.2
Plate 4	F05	18420_0365	GCTAGAAGCAGAACATTAGTGAAGCTTCAGCTTCCCGATATCCGACGGTAGTGTNNNNNNNNTCTTGGTGTGGTGGCG	200 picomole Ultramer DNA Plate Oligo	Standard Desalting	Quantity Only	0.2
Plate 4	F06	18453_0042	TTGCCAAACAACGGGCATCATCCGACCTTCAGCTTCCCGATATCCGACGGTAGTGTNNNNNNNNGAAAGCAAAGAGTTTTCG	200 picomole Ultramer DNA Plate Oligo	Standard Desalting	Quantity Only	0.2
Plate 4	F07	18577_0366	GTGATGGTAAAGACACAGACGTTGGTGCTTCAGCTTCCCGATATCCGACGGTAGTGTNNNNNNNNGTGGCGGGGTTGGGGG	200 picomole Ultramer DNA Plate Oligo	Standard Desalting	Quantity Only	0.2
Plate 4	F08	18626_0367	GTGTACATTGCTCATTGGGAACTGAACGTCTTCAGCTTCCCGATATCCGACGGTAGTGTNNNNNNNNAATAGTTTCGGGTTCC	200 picomole Ultramer DNA Plate Oligo	Standard Desalting	Quantity Only	0.2
Plate 4	F09	18639_0368	TCCCTCCCTAAAGGTTTCAAGCTTCAGCTTCCCGATATCCGACGGTAGTGTNNNNNNNNTCGGTCTGTTGATGTCGTAAGTCG	200 picomole Ultramer DNA Plate Oligo	Standard Desalting	Quantity Only	0.2
Plate 4	F10	18699_0369	TCGATCCCGTGGCCGTTTAGCACCTTCTTCAGCTTCCCGATATCCGACGGTAGTGTNNNNNNNNAACAACAACGAGCGATAAC	200 picomole Ultramer DNA Plate Oligo	Standard Desalting	Quantity Only	0.2
Plate 4	F11	18774_0370	ACTGGACAGTCGTATGGGGCGTGTGCTTCAGCTTCCCGATATCCGACGGTAGTGTNNNNNNNNATAACGGGGAAGCAAAG	200 picomole Ultramer DNA Plate Oligo	Standard Desalting	Quantity Only	0.2
Plate 4	F12	18846_0371	CATCGATAATACCCATTCATGTATGGATACTTCAGCTTCCCGATATCCGACGGTAGTGTNNNNNNNNTTCTCTCTTCTTTCTC	200 picomole Ultramer DNA Plate Oligo	Standard Desalting	Quantity Only	0.2
Plate 4	G01	19084_0373	GCCATGAGAGGTTCAAAATCACCTTCAGCTTCCCGATATCCGACGGTAGTGTNNNNNNNNGGCTTCTCTCGATCCTTTGATC	200 picomole Ultramer DNA Plate Oligo	Standard Desalting	Quantity Only	0.2
Plate 4	G02	19092_0374	GTTTTATCATTCGCTTCACTCCATATGCTTCAGCTTCCCGATATCCGACGGTAGTGTNNNNNNNNGTGGGCGACTTTAGGG	200 picomole Ultramer DNA Plate Oligo	Standard Desalting	Quantity Only	0.2
Plate 4	G03	19390_0377_SNP_a	GTTCTTAACTTAGCGGCTTTCCCATTCCTTCAGCTTCCCGATATCCGACGGTAGTGTNNNNNNNNACCCCAACACAAGAAAAA	200 picomole Ultramer DNA Plate Oligo	Standard Desalting	Quantity Only	0.2
Plate 4	G04	19403_0378	GTTGGTAGTTTAAGAGATTTGGTTTGTCTTCAGCTTCCCGATATCCGACGGTAGTGTNNNNNNNNGGGTTTCCTTATGATTGG	200 picomole Ultramer DNA Plate Oligo	Standard Desalting	Quantity Only	0.2
Plate 4	G05	19405_0379	GGGTTGTGGGAGTGAAGACTAGAGGTATGCTTCAGCTTCCCGATATCCGACGGTAGTGTNNNNNNNNGAGGGTTGTTTGAAAG	200 picomole Ultramer DNA Plate Oligo	Standard Desalting	Quantity Only	0.2
Plate 4	G06	19821_0380	CCATACAAAGCAAATGTGACAGCCTCTTCCTTCAGCTTCCCGATATCCGACGGTAGTGTNNNNNNNNGACAAAACAAACCTAC	200 picomole Ultramer DNA Plate Oligo	Standard Desalting	Quantity Only	0.2
Plate 4	G07	19827_0381	GTGATTATGGTGGTGGTGGTGGTGGACTTCAGCTTCCCGATATCCGACGGTAGTGTNNNNNNNNAGAGATCAGAGTAATAA	200 picomole Ultramer DNA Plate Oligo	Standard Desalting	Quantity Only	0.2
Plate 4	G08	19832_0382	CCTTGTTATGGGTTTGGTTGGTAATCCACTTCAGCTTCCCGATATCCGACGGTAGTGTNNNNNNNNCCATCAAAATAGAGAGA	200 picomole Ultramer DNA Plate Oligo	Standard Desalting	Quantity Only	0.2
Plate 4	G09	19838_0046	GAATCAGTAGTATATATCTACTCTATATGCTTCAGCTTCCCGATATCCGACGGTAGTGTNNNNNNNNTGGTGCTGATGATGAT	200 picomole Ultramer DNA Plate Oligo	Standard Desalting	Quantity Only	0.2
Plate 4	G10	19969_0383	ATTGGAGTTTCTGATTTCTAGGGCACCTTCAGCTTCCCGATATCCGACGGTAGTGTNNNNNNNNGAAAATTGACTTTGAAACA	200 picomole Ultramer DNA Plate Oligo	Standard Desalting	Quantity Only	0.2
Plate 4	G11	19977_0384	GGTTCCTTGGATTTCTTATTCCCTTTTGACTTCAGCTTCCCGATATCCGACGGTAGTGTNNNNNNNNAGAGAAAACAACAAAC	200 picomole Ultramer DNA Plate Oligo	Standard Desalting	Quantity Only	0.2
Plate 4	G12	19995_0385	GTGATTGTTTGCTTTGATTTTAGGTGTGCTTCAGCTTCCCGATATCCGACGGTAGTGTNNNNNNNNGGAAGATCGAATGTAGC	200 picomole Ultramer DNA Plate Oligo	Standard Desalting	Quantity Only	0.2
Plate 4	H01	20002_0047	CGTCCGATGCTAGCACAATAGAGGAGCTCTTCAGCTTCCCGATATCCGACGGTAGTGTNNNNNNNNGACTACATACTAATTG	200 picomole Ultramer DNA Plate Oligo	Standard Desalting	Quantity Only	0.2
Plate 4	H02	20153_0386	CCGTAATAATCTCCATCGTTCCTTGCTCTTCAGCTTCCCGATATCCGACGGTAGTGTNNNNNNNNGGTTTTTCGCGATGGCTA	200 picomole Ultramer DNA Plate Oligo	Standard Desalting	Quantity Only	0.2
Plate 4	H03	20170_0387	GGGAGGTTTCTGTTGGATGTTTTTGGCTTCAGCTTCCCGATATCCGACGGTAGTGTNNNNNNNNAGAGGTGTTAGAAAAA	200 picomole Ultramer DNA Plate Oligo	Standard Desalting	Quantity Only	0.2
Plate 4	H04	20181_0388	GATTCTGAGTTTAGGGTTTTGTTTGCTTCAGCTTCCCGATATCCGACGGTAGTGTNNNNNNNNAAAGCGTGCGAATGGA	200 picomole Ultramer DNA Plate Oligo	Standard Desalting	Quantity Only	0.2
Plate 4	H05	20188_0389_SNP_a	GAGATCTTCATGATAGTGTCTTGTTCGCTTCAGCTTCCCGATATCCGACGGTAGTGTNNNNNNNNGTAGGAGGTGGTGATGG	200 picomole Ultramer DNA Plate Oligo	Standard Desalting	Quantity Only	0.2
Plate 4	H06	20205_0037	CTCCGGATCTCGGCAGCTGGACGTGTCTTCTTCAGCTTCCCGATATCCGACGGTAGTGTNNNNNNNNGTAAAAATGAACTATA	200 picomole Ultramer DNA Plate Oligo	Standard Desalting	Quantity Only	0.2
Plate 4	H07	20218_0392	GTGGAAGGGGTACATATATGCTTTTGGGCTTCAGCTTCCCGATATCCGACGGTAGTGTNNNNNNNNAATTGTACCTGAAATG	200 picomole Ultramer DNA Plate Oligo	Standard Desalting	Quantity Only	0.2
Plate 4	H08	20262_0393	CTCTCAAACAGCGGCTCTCAAGGCTCCTTCAGCTTCCCGATATCCGACGGTAGTGTNNNNNNNNCAAACAAATTTACATGACA	200 picomole Ultramer DNA Plate Oligo	Standard Desalting	Quantity Only	0.2
Plate 4	H09	20293_0395_SNP_a	GTTTAGGGCACTCTTTGAGGAATTCAGCGCTTCAGCTTCCCGATATCCGACGGTAGTGTNNNNNNNNGAGGTTCAAATGTGAA	200 picomole Ultramer DNA Plate Oligo	Standard Desalting	Quantity Only	0.2
Plate 4	H10	20386_0396	GCATATGAGCTGGTTAGCAATGAGTTGTGCTTCAGCTTCCCGATATCCGACGGTAGTGTNNNNNNNNGGAGTAATGAATGGGA	200 picomole Ultramer DNA Plate Oligo	Standard Desalting	Quantity Only	0.2
Plate 4	H11	20411_0397	CGCCGAAGCCATCTCTAAGAGGAAATAGCTTCAGCTTCCCGATATCCGACGGTAGTGTNNNNNNNNGACAATAGAGGAGGAAA	200 picomole Ultramer DNA Plate Oligo	Standard Desalting	Quantity Only	0.2
Plate 4	H12	20572_0398	GCGGTGGTGGTGTTGATGGTAGCGGAAGTCTTCAGCTTCCCGATATCCGACGGTAGTGTNNNNNNNNAGTGGCGGTGGTGGTG	200 picomole Ultramer DNA Plate Oligo	Standard Desalting	Quantity Only	0.2
Plate 5	A01	20602_0399	GGACATATTTAGGAGAGAAGACGTTCCCCTTCAGCTTCCCGATATCCGACGGTAGTGTNNNNNNNNGTCAAAGCACTGAAACA	200 picomole Ultramer DNA Plate Oligo	Standard Desalting	Quantity Only	0.2
Plate 5	A02	20668_0400	CATGCTTAACTTCAAGATTCCAACACCTTCAGCTTCCCGATATCCGACGGTAGTGTNNNNNNNNGGATGATGAAGGTAACTTG	200 picomole Ultramer DNA Plate Oligo	Standard Desalting	Quantity Only	0.2
Plate 5	A03	20695_0401	CGTAGTGGTGAGGCCACCGCCAATCATCTTCAGCTTCCCGATATCCGACGGTAGTGTNNNNNNNNTGGTGGAGGTGGTGGT	200 picomole Ultramer DNA Plate Oligo	Standard Desalting	Quantity Only	0.2
Plate 5	A04	20703_0052	GGCCATCCAACTCGGAAATGACAGGGCACTTCAGCTTCCCGATATCCGACGGTAGTGTNNNNNNNNGTCTATGTACCTACACA	200 picomole Ultramer DNA Plate Oligo	Standard Desalting	Quantity Only	0.2
Plate 5	A05	20755_0402	ATCGGGGGTGACGGATGCGTGGAGCTTCAGCTTCCCGATATCCGACGGTAGTGTNNNNNNNNCGAGATCAGAAGGAGA	200 picomole Ultramer DNA Plate Oligo	Standard Desalting	Quantity Only	0.2
Plate 5	A06	20800_0403_SNP_a	GTGTCGTTGATCCCTCGAGATTCTGTGGCTTCAGCTTCCCGATATCCGACGGTAGTGTNNNNNNNNACCTAAACCCATCTCCA	200 picomole Ultramer DNA Plate Oligo	Standard Desalting	Quantity Only	0.2
Plate 5	A07	20877_0404	CGAGAAGTGCTTTCACCATGGAAAAAGCTTCAGCTTCCCGATATCCGACGGTAGTGTNNNNNNNNTTTGGTTCAGGCTCGT	200 picomole Ultramer DNA Plate Oligo	Standard Desalting	Quantity Only	0.2
Plate 5	A08	20885_0405	GTTGCTGATGTTGCTGCTACTGCTCTTCAGCTTCCCGATATCCGACGGTAGTGTNNNNNNNNGTCTTGCGCTCGATCGGTT	200 picomole Ultramer DNA Plate Oligo	Standard Desalting	Quantity Only	0.2
Plate 5	A09	20896_0406	GTTAGCCCAACCACAAGTAGCACCACCTTCAGCTTCCCGATATCCGACGGTAGTGTNNNNNNNNACAAGAACACATATAAAAG	200 picomole Ultramer DNA Plate Oligo	Standard Desalting	Quantity Only	0.2
Plate 5	A10	20904_0407	GAAGGTTTGGGTTTGAGTAGAAACTCAGCTTCAGCTTCCCGATATCCGACGGTAGTGTNNNNNNNNGGGTTTGGATTATTGGG	200 picomole Ultramer DNA Plate Oligo	Standard Desalting	Quantity Only	0.2
Plate 5	A11	20926_0408	GGTGATCCTGAAGAATTGTTGCTTCAGCTTCCCGATATCCGACGGTAGTGTNNNNNNNNGAGGAAGAGGATAAGATCAA	200 picomole Ultramer DNA Plate Oligo	Standard Desalting	Quantity Only	0.2
Plate 5	A12	20973_0409	GCAAGTGAGGAGATCTTCTCTTGAAGGAGCTTCAGCTTCCCGATATCCGACGGTAGTGTNNNNNNNNTCCTATTTGCATGCAA	200 picomole Ultramer DNA Plate Oligo	Standard Desalting	Quantity Only	0.2
Plate 5	B01	20988_0410	GTGAACTTTTGAATTGAGAGAGGTCTTTCCTTCAGCTTCCCGATATCCGACGGTAGTGTNNNNNNNNGGAAGAAGACAGATGA	200 picomole Ultramer DNA Plate Oligo	Standard Desalting	Quantity Only	0.2
Plate 5	B02	21002_0411	GAGAGAAACATGGAACCGAGGTTGCAAACTTCAGCTTCCCGATATCCGACGGTAGTGTNNNNNNNNAGGGATCCAAGGAGAG	200 picomole Ultramer DNA Plate Oligo	Standard Desalting	Quantity Only	0.2
Plate 5	B03	21084_0412	GACGGTAACTTAAATTTAATAATTAGGCCCTTCAGCTTCCCGATATCCGACGGTAGTGTNNNNNNNNAAGATAATGTGAGAGA	200 picomole Ultramer DNA Plate Oligo	Standard Desalting	Quantity Only	0.2
Plate 5	B04	21085_0413	GTAATCCAATGGAGATGTTAAAGGCGGCTTCAGCTTCCCGATATCCGACGGTAGTGTNNNNNNNNGGTTTAACATGGAACAAA	200 picomole Ultramer DNA Plate Oligo	Standard Desalting	Quantity Only	0.2
Plate 5	B05	21097_0414	ATCTCTCTAACGGCGAGGCAATGGGTCTTCAGCTTCCCGATATCCGACGGTAGTGTNNNNNNNNACCAAAAAACAAAGCACC	200 picomole Ultramer DNA Plate Oligo	Standard Desalting	Quantity Only	0.2
Plate 5	B06	21123_0415	CGTTGTACGTAGAGAGGTTTTGTTGTAGCTTCAGCTTCCCGATATCCGACGGTAGTGTNNNNNNNNAGAAGCAATGGAGAGT	200 picomole Ultramer DNA Plate Oligo	Standard Desalting	Quantity Only	0.2
Plate 5	B07	21221_0416	AGAAGATTGATCATCTCTTATCGTCTTAGCTTCAGCTTCCCGATATCCGACGGTAGTGTNNNNNNNNAAGAGGGTTCATGAAA	200 picomole Ultramer DNA Plate Oligo	Standard Desalting	Quantity Only	0.2
Plate 5	B08	21294_0417	GACGGTGGAGCGTGGCGGTTTCTTCAGCTTCCCGATATCCGACGGTAGTGTNNNNNNNNTGGAGGAGTCGCCGGAGGT	200 picomole Ultramer DNA Plate Oligo	Standard Desalting	Quantity Only	0.2
Plate 5	B09	21321_0053	GCTAGGTCCTTGTTATGTAATATATACACTTCAGCTTCCCGATATCCGACGGTAGTGTNNNNNNNNCTATAGATGAAATGGG	200 picomole Ultramer DNA Plate Oligo	Standard Desalting	Quantity Only	0.2
Plate 5	B10	21332_0054	GTAGTGGGAAATAGCATGATGGTGTTACCCTTCAGCTTCCCGATATCCGACGGTAGTGTNNNNNNNNGTACTTAATGACAACG	200 picomole Ultramer DNA Plate Oligo	Standard Desalting	Quantity Only	0.2
Plate 5	B11	21337_0418	GGTTACAGAAGGGTGAGGAGATGGAAGGCTTCAGCTTCCCGATATCCGACGGTAGTGTNNNNNNNNGGAAATTGCAGATAGCG	200 picomole Ultramer DNA Plate Oligo	Standard Desalting	Quantity Only	0.2
Plate 5	B12	21348_0419	GGCAATCAGACCATCTTGGTGTTCTTTGCCTTCAGCTTCCCGATATCCGACGGTAGTGTNNNNNNNNAAGAGGACAACGAAAC	200 picomole Ultramer DNA Plate Oligo	Standard Desalting	Quantity Only	0.2
Plate 5	C01	21350_0420	GCGTAGTTGATGGAGGTTGGTAGGGCTTCAGCTTCCCGATATCCGACGGTAGTGTNNNNNNNNAACGACGACTGACATA	200 picomole Ultramer DNA Plate Oligo	Standard Desalting	Quantity Only	0.2
Plate 5	C02	21427_0421	GGTCTTGGTTCCTTGCTCAGCTGCACGTCCTTCAGCTTCCCGATATCCGACGGTAGTGTNNNNNNNNACAACCAGAAAAAAAG	200 picomole Ultramer DNA Plate Oligo	Standard Desalting	Quantity Only	0.2
Plate 5	C03	21447_0422	CCTAAGTTATCAAAATAAAATAGAAACAGCTTCAGCTTCCCGATATCCGACGGTAGTGTNNNNNNNNACTCTTGATGATCCTT	200 picomole Ultramer DNA Plate Oligo	Standard Desalting	Quantity Only	0.2
Plate 5	C04	21531_0423	GCAGAGTTCATGATGAATGGTTTGCTGATCTTCAGCTTCCCGATATCCGACGGTAGTGTNNNNNNNNAGGAATTCATCTGCGA	200 picomole Ultramer DNA Plate Oligo	Standard Desalting	Quantity Only	0.2
Plate 5	C05	21585_0424	TCAACGTGTTTCTGCTGATTTTGACCGTTCTTCAGCTTCCCGATATCCGACGGTAGTGTNNNNNNNNGGAGAAGACTTACATC	200 picomole Ultramer DNA Plate Oligo	Standard Desalting	Quantity Only	0.2
Plate 5	C06	21638_0425_SNP_a	GCTGAGACAGCAACCCATTTTGTGCTTCAGCTTCCCGATATCCGACGGTAGTGTNNNNNNNNGTGTTTTATCACCACAAC	200 picomole Ultramer DNA Plate Oligo	Standard Desalting	Quantity Only	0.2
Plate 5	C07	21649_0426_SNP_a	TTTAAATCCCTAATCCAACACAACATGTCCTTCAGCTTCCCGATATCCGACGGTAGTGTNNNNNNNNGTAGTGGCGAATGGAG	200 picomole Ultramer DNA Plate Oligo	Standard Desalting	Quantity Only	0.2
Plate 5	C08	21711_0427	GCCTCGTGATAGAACTGATGAACAGGCTTCAGCTTCCCGATATCCGACGGTAGTGTNNNNNNNNAAGAACATAAATACGAGC	200 picomole Ultramer DNA Plate Oligo	Standard Desalting	Quantity Only	0.2
Plate 5	C09	21808_0057	GTCGATATTGTTTTCCTCGACTCCGATCCCTTCAGCTTCCCGATATCCGACGGTAGTGTNNNNNNNNATATATCTGCATGTAG	200 picomole Ultramer DNA Plate Oligo	Standard Desalting	Quantity Only	0.2
Plate 5	C10	21849_0058	GAGGGAAATGAAATCCTTTTTCTTTTAGCTTCAGCTTCCCGATATCCGACGGTAGTGTNNNNNNNNCGATCGAACTCATGGTT	200 picomole Ultramer DNA Plate Oligo	Standard Desalting	Quantity Only	0.2
Plate 5	C11	21937_0429	GCTGTCTTCTGGTGAGTGAAGTCAGTGCTTCAGCTTCCCGATATCCGACGGTAGTGTNNNNNNNNCGAAGAGTTTTATATAAA	200 picomole Ultramer DNA Plate Oligo	Standard Desalting	Quantity Only	0.2
Plate 5	C12	21956_0430	ATCTACTTAATCACACCTTTTATTTAGGGCTTCAGCTTCCCGATATCCGACGGTAGTGTNNNNNNNNCTCTATGATTTCCCTT	200 picomole Ultramer DNA Plate Oligo	Standard Desalting	Quantity Only	0.2
Plate 5	D01	22010_0431	GAGTTTGGAAGCTCACTTTCTGAATCCCTTCAGCTTCCCGATATCCGACGGTAGTGTNNNNNNNNCATTAGAAGGATATGATC	200 picomole Ultramer DNA Plate Oligo	Standard Desalting	Quantity Only	0.2
Plate 5	D02	22200_0434	GTTCTCTGGTGATTTTGGTCGGATTCTTCAGCTTCCCGATATCCGACGGTAGTGTNNNNNNNNGTTTTTAGGTTTGATGACCT	200 picomole Ultramer DNA Plate Oligo	Standard Desalting	Quantity Only	0.2
Plate 5	D03	22212_0435	GCAGTAGAGGTAACTTTTTCAGGCGCTTCAGCTTCCCGATATCCGACGGTAGTGTNNNNNNNNGATTTGTGGAAGCAGGG	200 picomole Ultramer DNA Plate Oligo	Standard Desalting	Quantity Only	0.2
Plate 5	D04	22421_0436	TTATGTGCCATAAGTACCTGTAACTTGCTTCAGCTTCCCGATATCCGACGGTAGTGTNNNNNNNNAGTCTAAAATTGAAGACT	200 picomole Ultramer DNA Plate Oligo	Standard Desalting	Quantity Only	0.2
Plate 5	D05	22458_0437	CTTCCTTCTGTTAAGGTTTTCACTGCTTCAGCTTCCCGATATCCGACGGTAGTGTNNNNNNNNTTGTCGGTTTCTTGGTTGCT	200 picomole Ultramer DNA Plate Oligo	Standard Desalting	Quantity Only	0.2
Plate 5	D06	22486_0438	GCAAAGGTTGGAACTTTTCTTGGGATGAGCTTCAGCTTCCCGATATCCGACGGTAGTGTNNNNNNNNGGAATCATGTCAAACA	200 picomole Ultramer DNA Plate Oligo	Standard Desalting	Quantity Only	0.2
Plate 5	D07	22488_0439	CAAAGAAGCTAGGCATCTGAAAGCTACCACTTCAGCTTCCCGATATCCGACGGTAGTGTNNNNNNNNAAGATCAAGAAACCAC	200 picomole Ultramer DNA Plate Oligo	Standard Desalting	Quantity Only	0.2
Plate 5	D08	22524_0440	GTAACATCAGCCTGCATGTAAACTCTGGCCTTCAGCTTCCCGATATCCGACGGTAGTGTNNNNNNNNGAAATTTATCACAAAA	200 picomole Ultramer DNA Plate Oligo	Standard Desalting	Quantity Only	0.2
Plate 5	D09	22582_0441	TGCTCAGCTTCAAGCTACACGAAACGCAGCTTCAGCTTCCCGATATCCGACGGTAGTGTNNNNNNNNGAAGTGGCGGTGGTGT	200 picomole Ultramer DNA Plate Oligo	Standard Desalting	Quantity Only	0.2
Plate 5	D10	22593_0442	CGTGGAGGTTTCAAGGATGTCTTGTGACTTCAGCTTCCCGATATCCGACGGTAGTGTNNNNNNNNAGATAAAGTCACTCCGG	200 picomole Ultramer DNA Plate Oligo	Standard Desalting	Quantity Only	0.2
Plate 5	D11	22629_0443	GAGTGATGATCTTGAAACCGATTGATGGGCTTCAGCTTCCCGATATCCGACGGTAGTGTNNNNNNNNACATGTAGGATCTTGG	200 picomole Ultramer DNA Plate Oligo	Standard Desalting	Quantity Only	0.2
Plate 5	D12	22708_0445_SNP_a	GCTTGAGGGAGAGACTTGAAGGAGGCTTCAGCTTCCCGATATCCGACGGTAGTGTNNNNNNNNAACTTACACTACACGACG	200 picomole Ultramer DNA Plate Oligo	Standard Desalting	Quantity Only	0.2
Plate 5	E01	22713_0446	GAAAGAAGTGGAAGAGAATCGAGGTCGGCTTCAGCTTCCCGATATCCGACGGTAGTGTNNNNNNNNACAGCGAGAAAGAAGC	200 picomole Ultramer DNA Plate Oligo	Standard Desalting	Quantity Only	0.2
Plate 5	E02	22751_0447	GGAAACTGACCATTACAGAGCCTGGTGGCTTCAGCTTCCCGATATCCGACGGTAGTGTNNNNNNNNGGTCTAGTGCCATGGC	200 picomole Ultramer DNA Plate Oligo	Standard Desalting	Quantity Only	0.2
Plate 5	E03	22772_0060	GCTTGAGGCACCTACATATGTAGTTGACTTCAGCTTCCCGATATCCGACGGTAGTGTNNNNNNNNGTCTCCTTAGGGCTGAGG	200 picomole Ultramer DNA Plate Oligo	Standard Desalting	Quantity Only	0.2
Plate 5	E04	22786_0448	TTCACCAACTCATCTCTCATCATCACCCTTCAGCTTCCCGATATCCGACGGTAGTGTNNNNNNNNAGAGAGAAGAGGACAAAG	200 picomole Ultramer DNA Plate Oligo	Standard Desalting	Quantity Only	0.2
Plate 5	E05	22829_0449	GCTTTATCTTTGTTTTGGAATTGAGGCTTCAGCTTCCCGATATCCGACGGTAGTGTNNNNNNNNGATCAGGATCTGGTGGTG	200 picomole Ultramer DNA Plate Oligo	Standard Desalting	Quantity Only	0.2
Plate 5	E06	22837_0061	CAGGAAAAAAGATAACTGCAAATGGGTGCTTCAGCTTCCCGATATCCGACGGTAGTGTNNNNNNNNAGAGATTCATGACCCG	200 picomole Ultramer DNA Plate Oligo	Standard Desalting	Quantity Only	0.2
Plate 5	E07	22912_0450	GCCCTTTTTGGATTGGGGATCAGCTTCAGCTTCCCGATATCCGACGGTAGTGTNNNNNNNNGAGCTTGTTGTCAGTCTTTGG	200 picomole Ultramer DNA Plate Oligo	Standard Desalting	Quantity Only	0.2
Plate 5	E08	22913_0451	GTTCTGACCGGTTTGAATGGTTCCATGCTTCAGCTTCCCGATATCCGACGGTAGTGTNNNNNNNNCATGTGTAGCAAGTGCTG	200 picomole Ultramer DNA Plate Oligo	Standard Desalting	Quantity Only	0.2
Plate 5	E09	22943_0452	CCGTTAAAGTGCAGTGTCTCGTCCTTCAGCTTCCCGATATCCGACGGTAGTGTNNNNNNNNTCGTTCATGATGATTGATCGG	200 picomole Ultramer DNA Plate Oligo	Standard Desalting	Quantity Only	0.2
Plate 5	E10	22972_0453	CCACAAATCAAGATGAGAAGCATGCTTCAGCTTCCCGATATCCGACGGTAGTGTNNNNNNNNTGGGTTCTCTTCTGCTGTTGG	200 picomole Ultramer DNA Plate Oligo	Standard Desalting	Quantity Only	0.2
Plate 5	E11	22993_0454	GGTGAAGCACGATATACTCTCGAGGTCTTCAGCTTCCCGATATCCGACGGTAGTGTNNNNNNNNAGAAGAAGGAAAGCAG	200 picomole Ultramer DNA Plate Oligo	Standard Desalting	Quantity Only	0.2
Plate 5	E12	23052_0455	GGGCCTGGGCTTTTGTTACTTCAGCTTCCCGATATCCGACGGTAGTGTNNNNNNNNTTGGAGGTTAGGGTTTGTGATG	200 picomole Ultramer DNA Plate Oligo	Standard Desalting	Quantity Only	0.2
Plate 5	F01	23063_0456	ATCCGGATCCGGATCATAACCATCGACCCTTCAGCTTCCCGATATCCGACGGTAGTGTNNNNNNNNCCTCTCTATCTCTCTC	200 picomole Ultramer DNA Plate Oligo	Standard Desalting	Quantity Only	0.2
Plate 5	F02	23163_0457	CAATTCCATCCTCTATTCTCGCCAGAGCTTCAGCTTCCCGATATCCGACGGTAGTGTNNNNNNNNGTATCGGGGCTCTTATGT	200 picomole Ultramer DNA Plate Oligo	Standard Desalting	Quantity Only	0.2
Plate 5	F03	23169_0458	CATTTGACCTTTATTACTTCTCTGTCTTCAGCTTCCCGATATCCGACGGTAGTGTNNNNNNNNTCTTCTTCCCGAGCCA	200 picomole Ultramer DNA Plate Oligo	Standard Desalting	Quantity Only	0.2
Plate 5	F04	23191_0459	GGGTCAGTTTTGGTCTTGACCTCAGCCTTCAGCTTCCCGATATCCGACGGTAGTGTNNNNNNNNCGATAAGATTTATTAGCA	200 picomole Ultramer DNA Plate Oligo	Standard Desalting	Quantity Only	0.2
Plate 5	F05	23231_0460	GAGGAAAATGAAGTGATCCAGCTGGCATACTTCAGCTTCCCGATATCCGACGGTAGTGTNNNNNNNNCACAAAGTATATACAA	200 picomole Ultramer DNA Plate Oligo	Standard Desalting	Quantity Only	0.2
Plate 5	F06	23266_0461	TGTCCCTCACCCTTCATATCCAAGCTTCAGCTTCCCGATATCCGACGGTAGTGTNNNNNNNNCCGATAACCTATTACGGTAA	200 picomole Ultramer DNA Plate Oligo	Standard Desalting	Quantity Only	0.2
Plate 5	F07	23312_0462	CCCATAACAGAAACCCCCACCTTCAGCTTCCCGATATCCGACGGTAGTGTNNNNNNNNCTTCTAGCATAGTTTTAGTGTTTTC	200 picomole Ultramer DNA Plate Oligo	Standard Desalting	Quantity Only	0.2
Plate 5	F08	23348_0463	GCAAGAGACAGATTCTTTACTTAACGAGACTTCAGCTTCCCGATATCCGACGGTAGTGTNNNNNNNNTCAAGAAAAGAAAAAG	200 picomole Ultramer DNA Plate Oligo	Standard Desalting	Quantity Only	0.2
Plate 5	F09	23383_0464	TTCCTCCCGCCGGCTTTCCGCTCTTCAGCTTCCCGATATCCGACGGTAGTGTNNNNNNNNGTCTTAATTGTTTGGCGAATTGC	200 picomole Ultramer DNA Plate Oligo	Standard Desalting	Quantity Only	0.2
Plate 5	F10	23384_0465	GCTTGGCTATTTTCTTCCAAGGAGGAGACCTTCAGCTTCCCGATATCCGACGGTAGTGTNNNNNNNNAAGAAGAAGACGAGAA	200 picomole Ultramer DNA Plate Oligo	Standard Desalting	Quantity Only	0.2
Plate 5	F11	23387_0466	GTCGCTTCTGTGTTCATAAACATAGGTCTCTTCAGCTTCCCGATATCCGACGGTAGTGTNNNNNNNNTTCTTGTGTCTTCTCT	200 picomole Ultramer DNA Plate Oligo	Standard Desalting	Quantity Only	0.2
Plate 5	F12	23434_0468	GGTGAGCCACCTCCTCGTTGATTTTCTCCTTCAGCTTCCCGATATCCGACGGTAGTGTNNNNNNNNATTGCACTTTCAAAGAC	200 picomole Ultramer DNA Plate Oligo	Standard Desalting	Quantity Only	0.2
Plate 5	G01	23472_0062	CCTATAATTCATGCTTTATGCAAACACCTTCAGCTTCCCGATATCCGACGGTAGTGTNNNNNNNNGCTCCTAGCCAGAATTTT	200 picomole Ultramer DNA Plate Oligo	Standard Desalting	Quantity Only	0.2
Plate 5	G02	23529_0470	CGAGGATTCTGATTTCGTTTTCTAGTTGCTTCAGCTTCCCGATATCCGACGGTAGTGTNNNNNNNNCCAATGGGCCTTTATTG	200 picomole Ultramer DNA Plate Oligo	Standard Desalting	Quantity Only	0.2
Plate 5	G03	23610_0471	GCGGAGATGAATGGAGGTGTGACGTCTTCAGCTTCCCGATATCCGACGGTAGTGTNNNNNNNNCGGATTCACCAAGGAAA	200 picomole Ultramer DNA Plate Oligo	Standard Desalting	Quantity Only	0.2
Plate 5	G04	23654_0472	ACTAGGGACATGCATCACATACATGCTTCAGCTTCCCGATATCCGACGGTAGTGTNNNNNNNNGGTACGAGTGTTTTGACG	200 picomole Ultramer DNA Plate Oligo	Standard Desalting	Quantity Only	0.2
Plate 5	G05	23682_0473	CGGTATCAGGGTTCTTCTGGTTGTTCTTCAGCTTCCCGATATCCGACGGTAGTGTNNNNNNNNGTCTCTAACCTGGCACTT	200 picomole Ultramer DNA Plate Oligo	Standard Desalting	Quantity Only	0.2
Plate 5	G06	23742_0474	GCTGTGAGAATGATCTTACTTGTGACCCTTCAGCTTCCCGATATCCGACGGTAGTGTNNNNNNNNGGTGGAGCAATGGATG	200 picomole Ultramer DNA Plate Oligo	Standard Desalting	Quantity Only	0.2
Plate 5	G07	23762_0475_SNP_a	GTGTGCGTGTGCTGGTTTCCTTCAGCTTCCCGATATCCGACGGTAGTGTNNNNNNNNGCGGCTGTATCTTTTTTTTCTTTCCT	200 picomole Ultramer DNA Plate Oligo	Standard Desalting	Quantity Only	0.2
Plate 5	G08	23764_0476	CCTACTCGGCTACTCCTACTTCCCTTCAGCTTCCCGATATCCGACGGTAGTGTNNNNNNNNCAATATTATATTTTGTCAAAGG	200 picomole Ultramer DNA Plate Oligo	Standard Desalting	Quantity Only	0.2
Plate 5	G09	23787_0477	CGTACGACGTATACACAAACACGCTTCAGCTTCCCGATATCCGACGGTAGTGTNNNNNNNNGTGATGGGTCTTTTGTTGTCTG	200 picomole Ultramer DNA Plate Oligo	Standard Desalting	Quantity Only	0.2
Plate 5	G10	23825_0478	GGTACCACGCTGTTTGAGGGACTCTGCTTCAGCTTCCCGATATCCGACGGTAGTGTNNNNNNNNTGCGTAGGAATATGCATCG	200 picomole Ultramer DNA Plate Oligo	Standard Desalting	Quantity Only	0.2
Plate 5	G11	23901_0479	ACTTTTCTCCCAAAGATAGGATTTTGAACTTCAGCTTCCCGATATCCGACGGTAGTGTNNNNNNNNGTAGCATTGAACGAGG	200 picomole Ultramer DNA Plate Oligo	Standard Desalting	Quantity Only	0.2
Plate 5	G12	23932_0480	AAAACTCTTGATGCTTGCCTAGCCCTTCAGCTTCCCGATATCCGACGGTAGTGTNNNNNNNNCCTTTTGTTATAATAAAAGAC	200 picomole Ultramer DNA Plate Oligo	Standard Desalting	Quantity Only	0.2
Plate 5	H01	23936_0481	CGTACTGGGTCAATGACGTGAATGTACGCCTTCAGCTTCCCGATATCCGACGGTAGTGTNNNNNNNNCCATTGTGCGTAACTG	200 picomole Ultramer DNA Plate Oligo	Standard Desalting	Quantity Only	0.2
Plate 5	H02	23937_0482_SNP_a	GCAGGGCCTCTAACTATGAAGCTTGACGTCTTCAGCTTCCCGATATCCGACGGTAGTGTNNNNNNNNTGGAGGACCTGGCTGC	200 picomole Ultramer DNA Plate Oligo	Standard Desalting	Quantity Only	0.2
Plate 5	H03	23961_0483	GGGCTTTTCTTTTGTTGAGGCCTTTTCCTTCAGCTTCCCGATATCCGACGGTAGTGTNNNNNNNNAGTAAGAGACGAGTCTTC	200 picomole Ultramer DNA Plate Oligo	Standard Desalting	Quantity Only	0.2
Plate 5	H04	24006_0484	GCGATGTGTGCGTTCATTGTCGAGAACTTCAGCTTCCCGATATCCGACGGTAGTGTNNNNNNNNGGCTAGATTCATTGGCAAA	200 picomole Ultramer DNA Plate Oligo	Standard Desalting	Quantity Only	0.2
Plate 5	H05	24039_0485	GTGTGTGTGTGTGTGTGTGTGTGTGTGTACTTCAGCTTCCCGATATCCGACGGTAGTGTNNNNNNNNAACACTTAAAGAGTGA	200 picomole Ultramer DNA Plate Oligo	Standard Desalting	Quantity Only	0.2
Plate 5	H06	24040_0064	GTCTTGTTGATGAACCTTTAATTTCTTGTCTTCAGCTTCCCGATATCCGACGGTAGTGTNNNNNNNNGTGTATGGTAAGGATA	200 picomole Ultramer DNA Plate Oligo	Standard Desalting	Quantity Only	0.2
Plate 5	H07	24046_0486	GTAGTGAGGAGGACTTGGCTGAAGCCTTCAGCTTCCCGATATCCGACGGTAGTGTNNNNNNNNGAAGAAGCGGCGCAGTGAA	200 picomole Ultramer DNA Plate Oligo	Standard Desalting	Quantity Only	0.2
Plate 5	H08	24058_0487	GCTCTAGGACAGAACGAAGGGTGTTTTCTCTTCAGCTTCCCGATATCCGACGGTAGTGTNNNNNNNNTCTAATTCTCAACTCG	200 picomole Ultramer DNA Plate Oligo	Standard Desalting	Quantity Only	0.2
Plate 5	H09	24252_0488	GGAAAGAGAAAGAGGAGGAGATTTAAGGCTTCAGCTTCCCGATATCCGACGGTAGTGTNNNNNNNNGAAAGTAAACAACAAAA	200 picomole Ultramer DNA Plate Oligo	Standard Desalting	Quantity Only	0.2
Plate 5	H10	24271_0489	GTAGTTGTGCCTATTGTTAACCCATGCTTCAGCTTCCCGATATCCGACGGTAGTGTNNNNNNNNGTGTGTGTGTGTTCTGTG	200 picomole Ultramer DNA Plate Oligo	Standard Desalting	Quantity Only	0.2
Plate 5	H11	24344_0490	TCATCAACAGCTCGCAATTCCTCAACATCCTTCAGCTTCCCGATATCCGACGGTAGTGTNNNNNNNNACAGAGAACATAGAAC	200 picomole Ultramer DNA Plate Oligo	Standard Desalting	Quantity Only	0.2
Plate 5	H12	24367_0491	GCCGACACTATTAGGGTAATACACCTTCAGCTTCCCGATATCCGACGGTAGTGTNNNNNNNNGGCTACGTCGCTTGTTGGTGG	200 picomole Ultramer DNA Plate Oligo	Standard Desalting	Quantity Only	0.2
Plate 6	A01	24405_0492	CGGAGATCCTTATGGGGAGTTCCGGAGCTTCAGCTTCCCGATATCCGACGGTAGTGTNNNNNNNNAAAGAGGGGAATGAGA	200 picomole Ultramer DNA Plate Oligo	Standard Desalting	Quantity Only	0.2
Plate 6	A02	24406_0493	GAAATCTCAGTATGGTGGTTCCCACCTTCAGCTTCCCGATATCCGACGGTAGTGTNNNNNNNNGCTGCCAGTAGACCAAAG	200 picomole Ultramer DNA Plate Oligo	Standard Desalting	Quantity Only	0.2
Plate 6	A03	24509_0065	CGGTGTTGGAGCCCAATTTGCTTGTTGCTTCAGCTTCCCGATATCCGACGGTAGTGTNNNNNNNNCGACTCATATGAACCTA	200 picomole Ultramer DNA Plate Oligo	Standard Desalting	Quantity Only	0.2
Plate 6	A04	24669_0494	GCAACTTCCAATTTGCATTAGACCCCTTCAGCTTCCCGATATCCGACGGTAGTGTNNNNNNNNGGAAGCTTTTGGGTTGAGTT	200 picomole Ultramer DNA Plate Oligo	Standard Desalting	Quantity Only	0.2
Plate 6	A05	24696_0495	CATAACTCTACAATCATCAGTGGTTCTTGCTTCAGCTTCCCGATATCCGACGGTAGTGTNNNNNNNNGGGTCACAAACTATTA	200 picomole Ultramer DNA Plate Oligo	Standard Desalting	Quantity Only	0.2
Plate 6	A06	24755_0496	GGGGGAACTAAAGGATGATTACTTAGCTTCAGCTTCCCGATATCCGACGGTAGTGTNNNNNNNNGGTTTGATGACGATGATGC	200 picomole Ultramer DNA Plate Oligo	Standard Desalting	Quantity Only	0.2
Plate 6	A07	24791_0497	GCGAAGAACAGAAGATGTTTGGAAGGCACTTCAGCTTCCCGATATCCGACGGTAGTGTNNNNNNNNAGAGAAGGGCGACGAG	200 picomole Ultramer DNA Plate Oligo	Standard Desalting	Quantity Only	0.2
Plate 6	A08	24810_0066	GCGTTTGTTGTTGATGATGGTGGAGTGCTTCAGCTTCCCGATATCCGACGGTAGTGTNNNNNNNNGAAACGAAGGTACATTAA	200 picomole Ultramer DNA Plate Oligo	Standard Desalting	Quantity Only	0.2
Plate 6	A09	24813_0067	ACCAATCTGACACAAAATAGGTCTCTACCTTCAGCTTCCCGATATCCGACGGTAGTGTNNNNNNNNTTCTTCGAAGGTTGGGT	200 picomole Ultramer DNA Plate Oligo	Standard Desalting	Quantity Only	0.2
Plate 6	A10	24848_0498	GTTGGTAGGCGTAACCTACCTTCACTTCAGCTTCCCGATATCCGACGGTAGTGTNNNNNNNNGGTGGTTCTGTTTCCATGGG	200 picomole Ultramer DNA Plate Oligo	Standard Desalting	Quantity Only	0.2
Plate 6	A11	24859_0499	CGTGTGTGTATGTGAGAGCAGAAATCATACTTCAGCTTCCCGATATCCGACGGTAGTGTNNNNNNNNGGGTTAAGGTAACAAA	200 picomole Ultramer DNA Plate Oligo	Standard Desalting	Quantity Only	0.2
Plate 6	A12	24871_0500	GCTTCTTTTTTTGAAGTTCTTGAGGTCTTCAGCTTCCCGATATCCGACGGTAGTGTNNNNNNNNTTAGAGAAAGAGAAGAG	200 picomole Ultramer DNA Plate Oligo	Standard Desalting	Quantity Only	0.2
Plate 6	B01	24906_0501	CCTCTTCGCGTGAGTTTTGAAGGCTTCAGCTTCCCGATATCCGACGGTAGTGTNNNNNNNNCAAACAAACAAAAAGGGAACC	200 picomole Ultramer DNA Plate Oligo	Standard Desalting	Quantity Only	0.2
Plate 6	B02	24931_0502	GCAAAGGAAGCTTAATGCGGATGATGGCTTCAGCTTCCCGATATCCGACGGTAGTGTNNNNNNNNGCAAAACCGTATCAGA	200 picomole Ultramer DNA Plate Oligo	Standard Desalting	Quantity Only	0.2
Plate 6	B03	24954_0045	GACATCTTTTAAGCAAGGTTTGGCGACCCTTCAGCTTCCCGATATCCGACGGTAGTGTNNNNNNNNGAAGTACATATTGGTCA	200 picomole Ultramer DNA Plate Oligo	Standard Desalting	Quantity Only	0.2
Plate 6	B04	24958_0504	CCGTTCGATTGTGACCCGAAACCAGTCCTTCAGCTTCCCGATATCCGACGGTAGTGTNNNNNNNNGATCCATGGATTCTGGAG	200 picomole Ultramer DNA Plate Oligo	Standard Desalting	Quantity Only	0.2
Plate 6	B05	24959_0505	CCCCACCCACTAAGACAACTTCAGCTTCCCGATATCCGACGGTAGTGTNNNNNNNNCATGACCATGAAAGAATGTTACTATCT	200 picomole Ultramer DNA Plate Oligo	Standard Desalting	Quantity Only	0.2
Plate 6	B06	24982_0506	GCACTGAGACGCGTGTAGTAGTACTCAACTTCAGCTTCCCGATATCCGACGGTAGTGTNNNNNNNNGGGGATGGACAAAAAGA	200 picomole Ultramer DNA Plate Oligo	Standard Desalting	Quantity Only	0.2
Plate 6	B07	25004_0507	GCGAAGTTGGGGATCATGGGTTACTGACTTCAGCTTCCCGATATCCGACGGTAGTGTNNNNNNNNACAACATAACATGGTGAA	200 picomole Ultramer DNA Plate Oligo	Standard Desalting	Quantity Only	0.2
Plate 6	B08	25016_0508	GAGAAGCTTTGCGTCGGGTTTGGGCTTCAGCTTCCCGATATCCGACGGTAGTGTNNNNNNNNGGAGAAGAAGACGAGCG	200 picomole Ultramer DNA Plate Oligo	Standard Desalting	Quantity Only	0.2
Plate 6	B09	25087_0509_SNP_a	GTTACAAATGGTGAGCGGATAGAATTTTTCTTCAGCTTCCCGATATCCGACGGTAGTGTNNNNNNNNAAATAATCAAAACACA	200 picomole Ultramer DNA Plate Oligo	Standard Desalting	Quantity Only	0.2
Plate 6	B10	25089_0510_SNP_a	GATTCTGGTGCTTTTAACACCTTCAGCTTCCCGATATCCGACGGTAGTGTNNNNNNNNTGTAACCACGTCTCATGCGAATTGA	200 picomole Ultramer DNA Plate Oligo	Standard Desalting	Quantity Only	0.2
Plate 6	B11	25204_0068	CAAAGTTATGGAGAATGAGAGAGAAAAGCCTTCAGCTTCCCGATATCCGACGGTAGTGTNNNNNNNNGATAAACGAGATCTGC	200 picomole Ultramer DNA Plate Oligo	Standard Desalting	Quantity Only	0.2
Plate 6	B12	25224_0511	GCAACAAACATGCATGTGCTAGTGCTTCAGCTTCCCGATATCCGACGGTAGTGTNNNNNNNNTGATGGTTGCTCCTGATGATG	200 picomole Ultramer DNA Plate Oligo	Standard Desalting	Quantity Only	0.2
Plate 6	C01	25228_0512	GCTATCGCTGCAGTATTTGATATGTGGCTTCAGCTTCCCGATATCCGACGGTAGTGTNNNNNNNNGGAATTATAGGAAGTGA	200 picomole Ultramer DNA Plate Oligo	Standard Desalting	Quantity Only	0.2
Plate 6	C02	25271_0513	TTGCTTCTTTCTTCCTCTCCACGCCTTCAGCTTCCCGATATCCGACGGTAGTGTNNNNNNNNGTTCTGTATCTGCAAATTTCT	200 picomole Ultramer DNA Plate Oligo	Standard Desalting	Quantity Only	0.2
Plate 6	C03	25362_0514	GCAGATTAAGCATAACGAGGTGATGCCTTCAGCTTCCCGATATCCGACGGTAGTGTNNNNNNNNCGAGGTCGTAGGGATG	200 picomole Ultramer DNA Plate Oligo	Standard Desalting	Quantity Only	0.2
Plate 6	C04	25370_0515	CCCAAAATATAGTATAAAGGTGCTCAAGCTTCAGCTTCCCGATATCCGACGGTAGTGTNNNNNNNNCTAGCATCATCATGGAG	200 picomole Ultramer DNA Plate Oligo	Standard Desalting	Quantity Only	0.2
Plate 6	C05	25397_0069	GCTTGGAGTAAATGTGGTTCATGATCTGCTTCAGCTTCCCGATATCCGACGGTAGTGTNNNNNNNNAAGAACAACACAATAA	200 picomole Ultramer DNA Plate Oligo	Standard Desalting	Quantity Only	0.2
Plate 6	C06	25471_0516	GGAAGTGGAAAAAGCAGAAGCAGTAGAACTTCAGCTTCCCGATATCCGACGGTAGTGTNNNNNNNNGGCGTCTTGAAGAGTAG	200 picomole Ultramer DNA Plate Oligo	Standard Desalting	Quantity Only	0.2
Plate 6	C07	25485_0517	GATGAAGCATATAGTACATTACATAGGGTCTTCAGCTTCCCGATATCCGACGGTAGTGTNNNNNNNNTATTCGTTGGGGTTTG	200 picomole Ultramer DNA Plate Oligo	Standard Desalting	Quantity Only	0.2
Plate 6	C08	25488_0518	GCTTTGTTATGTTTACCGGATTAGTTCTTCAGCTTCCCGATATCCGACGGTAGTGTNNNNNNNNCGCCATTTGGGTGATAC	200 picomole Ultramer DNA Plate Oligo	Standard Desalting	Quantity Only	0.2
Plate 6	C09	25572_0519	GTAGGAGGGAGAGAAAGACCAGTTGGAGCTTCAGCTTCCCGATATCCGACGGTAGTGTNNNNNNNNGTCATCCGAACACACA	200 picomole Ultramer DNA Plate Oligo	Standard Desalting	Quantity Only	0.2
Plate 6	C10	25576_0520	GTGCCCTTGTGGTGGCTTCCATGGCGGCTTCAGCTTCCCGATATCCGACGGTAGTGTNNNNNNNNATAAAGCAGAGCCAGCCA	200 picomole Ultramer DNA Plate Oligo	Standard Desalting	Quantity Only	0.2
Plate 6	C11	25585_0521	ACCTAATTCTCCAACCGCATTTTCTGCTCTTCAGCTTCCCGATATCCGACGGTAGTGTNNNNNNNNCTTCTCTGTCTCTTCTT	200 picomole Ultramer DNA Plate Oligo	Standard Desalting	Quantity Only	0.2
Plate 6	C12	25591_0522	GTCCCACAACGAGTCCGTCTTCAGCTTCCCGATATCCGACGGTAGTGTNNNNNNNNTGGGAGTGGGGGATGCTTTGTGTTTTG	200 picomole Ultramer DNA Plate Oligo	Standard Desalting	Quantity Only	0.2
Plate 6	D01	25595_0523	GGCTTTCGAGCATGGAGACGCCTCCCTTCTTCAGCTTCCCGATATCCGACGGTAGTGTNNNNNNNNTGGAGAGCACTGCAGAT	200 picomole Ultramer DNA Plate Oligo	Standard Desalting	Quantity Only	0.2
Plate 6	D02	25619_0524	TTTACCATCAGTGGCGGCTCTCCTTCAGCTTCCCGATATCCGACGGTAGTGTNNNNNNNNCGATGACTATCTATGTATAGAG	200 picomole Ultramer DNA Plate Oligo	Standard Desalting	Quantity Only	0.2
Plate 6	D03	25638_0525	GGGTTTTGAGCTTTTTTTCTTTTCGGCCTTCAGCTTCCCGATATCCGACGGTAGTGTNNNNNNNNGGTTAATGGGCTTTGGG	200 picomole Ultramer DNA Plate Oligo	Standard Desalting	Quantity Only	0.2
Plate 6	D04	25639_0526	GCATACATAATAACATAGGTGGGGCACAACTTCAGCTTCCCGATATCCGACGGTAGTGTNNNNNNNNAATGGAACTGGTGATG	200 picomole Ultramer DNA Plate Oligo	Standard Desalting	Quantity Only	0.2
Plate 6	D05	25646_0527	CGATGCTTCAGGTGCTTGAGAGGCTTCAGCTTCCCGATATCCGACGGTAGTGTNNNNNNNNGTCTGCGTTGCCTTTCGTTCTG	200 picomole Ultramer DNA Plate Oligo	Standard Desalting	Quantity Only	0.2
Plate 6	D06	25706_0528	CTATAAATGAGCCCACACCACACGACTTCAGCTTCCCGATATCCGACGGTAGTGTNNNNNNNNTTCTTCTTCTTCTTTCTTCT	200 picomole Ultramer DNA Plate Oligo	Standard Desalting	Quantity Only	0.2
Plate 6	D07	25736_0529	GCGAAGGTGACGGATAACGGAGTCTCTTCAGCTTCCCGATATCCGACGGTAGTGTNNNNNNNNCGACCAGAAAGTAAGAAAAA	200 picomole Ultramer DNA Plate Oligo	Standard Desalting	Quantity Only	0.2
Plate 6	D08	25739_0530	GCCTCGTCGGCGAGCGATACACAGAGATCTTCAGCTTCCCGATATCCGACGGTAGTGTNNNNNNNNGAAAGAAGAAGATAAAC	200 picomole Ultramer DNA Plate Oligo	Standard Desalting	Quantity Only	0.2
Plate 6	D09	25746_0531	GCACGAAGCTGCAACAAGGCCGTTATCGGCTTCAGCTTCCCGATATCCGACGGTAGTGTNNNNNNNNCAGAATTGACCCCAAA	200 picomole Ultramer DNA Plate Oligo	Standard Desalting	Quantity Only	0.2
Plate 6	D10	25749_0532	GATAATCTTGAAAAAATGGGTCTAGAGCTCTTCAGCTTCCCGATATCCGACGGTAGTGTNNNNNNNNGGATAATAGGATGAGG	200 picomole Ultramer DNA Plate Oligo	Standard Desalting	Quantity Only	0.2
Plate 6	D11	25752_0533	CACACCAAACTAATACCGTAAAAACAATCTTCAGCTTCCCGATATCCGACGGTAGTGTNNNNNNNNCCTTCTTCTTTCTTGA	200 picomole Ultramer DNA Plate Oligo	Standard Desalting	Quantity Only	0.2
Plate 6	D12	25786_0534	GATCATATGGAGGATGAAGCAGAAGAAGCTTCAGCTTCCCGATATCCGACGGTAGTGTNNNNNNNNAAGGTGTAGAGGCTGA	200 picomole Ultramer DNA Plate Oligo	Standard Desalting	Quantity Only	0.2
Plate 6	E01	25797_0535	GGTGGAAGAATTAAACCGAGTTAGTGCTGCTTCAGCTTCCCGATATCCGACGGTAGTGTNNNNNNNNTGTGGTGGGTTCTTGA	200 picomole Ultramer DNA Plate Oligo	Standard Desalting	Quantity Only	0.2
Plate 6	E02	25806_0002	ACTCTTACATAGTCTAAAATGCTTTCCACTTCAGCTTCCCGATATCCGACGGTAGTGTNNNNNNNNCAAAAATCAAAATAAAG	200 picomole Ultramer DNA Plate Oligo	Standard Desalting	Quantity Only	0.2
Plate 6	E03	25811_0004	GGGAAATGAGAGCAAGAGCAATTTGGGAGCTTCAGCTTCCCGATATCCGACGGTAGTGTNNNNNNNNGAATGGGCCTAAATAG	200 picomole Ultramer DNA Plate Oligo	Standard Desalting	Quantity Only	0.2
Plate 6	E04	25820_0005	GAAATATTCAGACCACGAATTTCGAGTGCTTCAGCTTCCCGATATCCGACGGTAGTGTNNNNNNNNGGAGGAAAAAGAACCA	200 picomole Ultramer DNA Plate Oligo	Standard Desalting	Quantity Only	0.2
Plate 6	E05	25822_0006_SNP_a	GTGGTGATGACGATGAAATAGAAGATGTGCTTCAGCTTCCCGATATCCGACGGTAGTGTNNNNNNNNGTGCCAATATGGAGAG	200 picomole Ultramer DNA Plate Oligo	Standard Desalting	Quantity Only	0.2
Plate 6	E06	26035_0001	TGACGCACTCCTTCACCGATTCTTCCTTCAGCTTCCCGATATCCGACGGTAGTGTNNNNNNNNCAAACCAGACCAGAAAA	200 picomole Ultramer DNA Plate Oligo	Standard Desalting	Quantity Only	0.2
Plate 6	E07	26078_0002	GTCTTTTCTGCATTGAAGATCGATGCCTTCAGCTTCCCGATATCCGACGGTAGTGTNNNNNNNNTGTATATCAAAAGGGATAC	200 picomole Ultramer DNA Plate Oligo	Standard Desalting	Quantity Only	0.2
Plate 6	E08	26079_0003	GCTGCATCGTTTTGTCCGGCGGAGGCTTCAGCTTCCCGATATCCGACGGTAGTGTNNNNNNNNAGAGACGAATCAACCG	200 picomole Ultramer DNA Plate Oligo	Standard Desalting	Quantity Only	0.2
Plate 6	E09	26127_0004	GTAGCTAGAATGCCTTTTGGCCTTCAGCTTCCCGATATCCGACGGTAGTGTNNNNNNNNGAACTAGAAGTCTAGAAGTGAG	200 picomole Ultramer DNA Plate Oligo	Standard Desalting	Quantity Only	0.2
Plate 6	E10	26133_0005	GCGTTTCGCGATCTCTCAGAGACGCGATCCTTCAGCTTCCCGATATCCGACGGTAGTGTNNNNNNNNAAGAAAAACTAAAAGA	200 picomole Ultramer DNA Plate Oligo	Standard Desalting	Quantity Only	0.2
Plate 6	E11	26155_0006	CCACCTTCTTCGACATCATCATCAGCTTCAGCTTCCCGATATCCGACGGTAGTGTNNNNNNNNGATTTACCGGTTTTTTCCCT	200 picomole Ultramer DNA Plate Oligo	Standard Desalting	Quantity Only	0.2
Plate 6	E12	26172_0007	CGGAGGAAGATAAGATTACAAGAATCTCTCTTCAGCTTCCCGATATCCGACGGTAGTGTNNNNNNNNTGTTTCCCCTCGTTCT	200 picomole Ultramer DNA Plate Oligo	Standard Desalting	Quantity Only	0.2
Plate 6	F01	26181_0046	GGATTTTGAGTCATTTTAACCGCGGGGGCTTCAGCTTCCCGATATCCGACGGTAGTGTNNNNNNNNCAAGATAACTAGGTAAG	200 picomole Ultramer DNA Plate Oligo	Standard Desalting	Quantity Only	0.2
Plate 6	F02	26216_0009_SNP_a	TCAATTATCCGACCCGGTAACTTCAGCTTCCCGATATCCGACGGTAGTGTNNNNNNNNGAAATCAAACACAAAGCTTATAAAA	200 picomole Ultramer DNA Plate Oligo	Standard Desalting	Quantity Only	0.2
Plate 6	F03	26278_0010	GCCGTTCTCTTCGTCGGAATGTCTCTCTTCAGCTTCCCGATATCCGACGGTAGTGTNNNNNNNNATTCTTCTTCTTCCTC	200 picomole Ultramer DNA Plate Oligo	Standard Desalting	Quantity Only	0.2
Plate 6	F04	26285_0011_SNP_a	CACGTCTCCGTTCGGAGCTCTTCAGCTTCCCGATATCCGACGGTAGTGTNNNNNNNNGAGTTCTTAAATGACTAATATCAATT	200 picomole Ultramer DNA Plate Oligo	Standard Desalting	Quantity Only	0.2
Plate 6	F05	26541_0012	GGTACAGATGAGTTCTGGATTTGCTGCGCTTCAGCTTCCCGATATCCGACGGTAGTGTNNNNNNNNACAAACAGTCTCGCCAA	200 picomole Ultramer DNA Plate Oligo	Standard Desalting	Quantity Only	0.2
Plate 6	F06	26614_0015	GGGTTTCCCCTACTTCAAGTGTTTACTCTTCAGCTTCCCGATATCCGACGGTAGTGTNNNNNNNNCAAAAGCACACGAAAA	200 picomole Ultramer DNA Plate Oligo	Standard Desalting	Quantity Only	0.2
Plate 6	F07	26713_0016	CCATACATACAAAAAGTCGTGGTGCTTCAGCTTCCCGATATCCGACGGTAGTGTNNNNNNNNTTTTTTGTTTACTCTGCGGCG	200 picomole Ultramer DNA Plate Oligo	Standard Desalting	Quantity Only	0.2
Plate 6	F08	26803_0017	GTTGCAAATAAGACACTTTTTGGTGTTTCTTCAGCTTCCCGATATCCGACGGTAGTGTNNNNNNNNAAGGAGACTGTTCTCCC	200 picomole Ultramer DNA Plate Oligo	Standard Desalting	Quantity Only	0.2
Plate 6	F09	26891_0018	CATGGTTTGTGTGTGTGTGAGTGGCTTCAGCTTCCCGATATCCGACGGTAGTGTNNNNNNNNATCCACATGTCGAAGACTCA	200 picomole Ultramer DNA Plate Oligo	Standard Desalting	Quantity Only	0.2
Plate 6	F10	26895_0019	GGTTTTTAAGTCATTGCTTTGTTGATGCCTTCAGCTTCCCGATATCCGACGGTAGTGTNNNNNNNNGAACAAGGGGAGGAGG	200 picomole Ultramer DNA Plate Oligo	Standard Desalting	Quantity Only	0.2
Plate 6	F11	26942_0020	GCAGTGACTTGTGCTAAAGCTTGTTGACTTCAGCTTCCCGATATCCGACGGTAGTGTNNNNNNNNGAGGCTCGAATCTGAGA	200 picomole Ultramer DNA Plate Oligo	Standard Desalting	Quantity Only	0.2
Plate 6	F12	26993_0022	TCCGAGGTTTAACCACAGACAAGAATCCTTCAGCTTCCCGATATCCGACGGTAGTGTNNNNNNNNAACACAATCCAAGAAGA	200 picomole Ultramer DNA Plate Oligo	Standard Desalting	Quantity Only	0.2
Plate 6	G01	27077_0025	GGAGGAGAGACATCAAGAGAATCTACAGCCTTCAGCTTCCCGATATCCGACGGTAGTGTNNNNNNNNCACCCAAAAGAGAGAA	200 picomole Ultramer DNA Plate Oligo	Standard Desalting	Quantity Only	0.2
Plate 6	G02	27095_0026	GCTTCCCGAGCGAAGAACGTCCATTTGAACTTCAGCTTCCCGATATCCGACGGTAGTGTNNNNNNNNGAAGTGGAAAGCTTTG	200 picomole Ultramer DNA Plate Oligo	Standard Desalting	Quantity Only	0.2
Plate 6	G03	27175_0052	CACACATCGGCTAAATGTTGAGACAATGACTTCAGCTTCCCGATATCCGACGGTAGTGTNNNNNNNNTAGAAATCGGTCAAGA	200 picomole Ultramer DNA Plate Oligo	Standard Desalting	Quantity Only	0.2
Plate 6	G04	27203_0072	GTCCAATTGATGAGGTTATTTAGAAGTCCTTCAGCTTCCCGATATCCGACGGTAGTGTNNNNNNNNCTTTGGAGTCTAATAAG	200 picomole Ultramer DNA Plate Oligo	Standard Desalting	Quantity Only	0.2
Plate 6	G05	27434_0028	GCGTTGCTCCTTTATAATGGGATTGCCTTCAGCTTCCCGATATCCGACGGTAGTGTNNNNNNNNGTACATCTTTAGAAGCAAG	200 picomole Ultramer DNA Plate Oligo	Standard Desalting	Quantity Only	0.2
Plate 6	G06	27604_0029	GTGGAGAGGTGTTTGCCTTGGCTTCAGCTTCCCGATATCCGACGGTAGTGTNNNNNNNNGGATATAATAAAAATGGGGAAG	200 picomole Ultramer DNA Plate Oligo	Standard Desalting	Quantity Only	0.2
Plate 6	G07	27699_0030	CCGATGAGTCGCCGGAGGAAACTTCAGCTTCCCGATATCCGACGGTAGTGTNNNNNNNNGGGTTTTGGAAGGGGTTGG	200 picomole Ultramer DNA Plate Oligo	Standard Desalting	Quantity Only	0.2
Plate 6	G08	27749_0031	TTAAGTCAATTCGTCGTCATACCCACACCCTTCAGCTTCCCGATATCCGACGGTAGTGTNNNNNNNNGAACCCGAGCAGAAGA	200 picomole Ultramer DNA Plate Oligo	Standard Desalting	Quantity Only	0.2
Plate 6	G09	27790_0032	ACACCGCATAAGTTACATTACAACACACCCTTCAGCTTCCCGATATCCGACGGTAGTGTNNNNNNNNAAAGAAACAAAATCAA	200 picomole Ultramer DNA Plate Oligo	Standard Desalting	Quantity Only	0.2
Plate 6	G10	28043_0075	CACTATTCATTATTTACATGCATGGCTTCAGCTTCCCGATATCCGACGGTAGTGTNNNNNNNNGGTGTATTGATGCTTGTTTG	200 picomole Ultramer DNA Plate Oligo	Standard Desalting	Quantity Only	0.2
Plate 6	G11	28047_0033	AGGGTCCAGACTATAATCCAGAGGCCTTCAGCTTCCCGATATCCGACGGTAGTGTNNNNNNNNCCAATTTGGTGATGAGG	200 picomole Ultramer DNA Plate Oligo	Standard Desalting	Quantity Only	0.2
Plate 6	G12	28090_0076	CAATATACGGTACCAAAGAAGTGGTGGCTCTTCAGCTTCCCGATATCCGACGGTAGTGTNNNNNNNNCAGAATTGGTACTAAA	200 picomole Ultramer DNA Plate Oligo	Standard Desalting	Quantity Only	0.2
Plate 6	H01	28686_0034_SNP_a	GGGTTTGGTTTGGACTGGTTTGAGTCTTCAGCTTCCCGATATCCGACGGTAGTGTNNNNNNNNGTGCAAACAATTACATATTT	200 picomole Ultramer DNA Plate Oligo	Standard Desalting	Quantity Only	0.2
Plate 6	H02	28691_0035_SNP_a	AATAAAAAAAAGTGGTGGACACGTAAGGCTTCAGCTTCCCGATATCCGACGGTAGTGTNNNNNNNNGATGATTGTGATGGAGG	200 picomole Ultramer DNA Plate Oligo	Standard Desalting	Quantity Only	0.2
Plate 6	H03	28815_0037	CGGTTGGATAAATTAGGGTTTGTTGCCGACTTCAGCTTCCCGATATCCGACGGTAGTGTNNNNNNNNGGGAGTGGCTTGGGTG	200 picomole Ultramer DNA Plate Oligo	Standard Desalting	Quantity Only	0.2
Plate 6	H04	28894_0038	CAGAAGAAACTGCAGAAACAGTACCACTTCAGCTTCCCGATATCCGACGGTAGTGTNNNNNNNNTATACTTGTGTGTGCGTG	200 picomole Ultramer DNA Plate Oligo	Standard Desalting	Quantity Only	0.2
Plate 6	H05	28957_0040	GTGACGATAACTCGATGTATTGCTCTTCAGCTTCCCGATATCCGACGGTAGTGTNNNNNNNNGATTGTAAATCAAAACAAATA	200 picomole Ultramer DNA Plate Oligo	Standard Desalting	Quantity Only	0.2
Plate 6	H06	29052_0041	GTCCCGATGTCGAGCTTTTTGCTCTTCAGCTTCCCGATATCCGACGGTAGTGTNNNNNNNNACACCCAAAAAAAAGAAG	200 picomole Ultramer DNA Plate Oligo	Standard Desalting	Quantity Only	0.2
Plate 6	H07	29162_0042_SNP_a	GTCAACCGGAGTCCAAGTCTTCCAGGGTACTTCAGCTTCCCGATATCCGACGGTAGTGTNNNNNNNNATTCTCTTCTCTGTTT	200 picomole Ultramer DNA Plate Oligo	Standard Desalting	Quantity Only	0.2
Plate 6	H08	29415_0043_SNP_a	GTAAGACGGGTTGTTCCTCCCTAGGCCTTCAGCTTCCCGATATCCGACGGTAGTGTNNNNNNNNAGCTGAAACAAATACTGAA	200 picomole Ultramer DNA Plate Oligo	Standard Desalting	Quantity Only	0.2
Plate 6	H09	29488_0017	GCTCTATGTGATGTTTTGGCTTCAGCTTCCCGATATCCGACGGTAGTGTNNNNNNNNGGTTTTATTACCTTTTCTGTTTTGGA	200 picomole Ultramer DNA Plate Oligo	Standard Desalting	Quantity Only	0.2
Plate 6	H10	29496_0046	GCTAAAGGGGTGTGGTTGGCTTCTTCAGCTTCCCGATATCCGACGGTAGTGTNNNNNNNNAATGGCCTTGCGTGGAGG	200 picomole Ultramer DNA Plate Oligo	Standard Desalting	Quantity Only	0.2
Plate 6	H11	29538_0047	CACAGAAGCTTGCGGAAGGGCTTCAAGCTTCAGCTTCCCGATATCCGACGGTAGTGTNNNNNNNNCAAAAGAGAAAAACGAGA	200 picomole Ultramer DNA Plate Oligo	Standard Desalting	Quantity Only	0.2
Plate 6	H12	29598_0048_SNP_a	ATTGTAACCGAGTAACAATCTTTGTGGCCTTCAGCTTCCCGATATCCGACGGTAGTGTNNNNNNNNTCGGTTTTGGGTTAGTC	200 picomole Ultramer DNA Plate Oligo	Standard Desalting	Quantity Only	0.2
Plate 7	A01	29911	CTCTCTCCCCGTGCGTTCTCTTCTCCTTCAGCTTCCCGATATCCGACGGTAGTGTNNNNNNNNAAACTCTCTCTCTCTCTCT	200 picomole Ultramer DNA Plate Oligo	Standard Desalting	Quantity Only	0.2
Plate 7	A02	30041_0049	GAATCTGATGAGGACGAGGAGGATGTCTTCAGCTTCCCGATATCCGACGGTAGTGTNNNNNNNNAGAGGAATGAGAAGAA	200 picomole Ultramer DNA Plate Oligo	Standard Desalting	Quantity Only	0.2
Plate 7	A03	30141_0050	GCTTGGCAAATCTGACCAAACATATGATCTTCAGCTTCCCGATATCCGACGGTAGTGTNNNNNNNNCAAAACAAAAGGATCCA	200 picomole Ultramer DNA Plate Oligo	Standard Desalting	Quantity Only	0.2
Plate 7	A04	30313_0051	CCCCCTCCATGGCGGTGTGTACTTCAGCTTCCCGATATCCGACGGTAGTGTNNNNNNNNGGCGGAAAAAATAAATCAA	200 picomole Ultramer DNA Plate Oligo	Standard Desalting	Quantity Only	0.2
Plate 7	A05	30490_0078	GTCCTAAGTCACGAGCACCCTCTACAAGGCTTCAGCTTCCCGATATCCGACGGTAGTGTNNNNNNNNTTAGAAATCCGAGTCT	200 picomole Ultramer DNA Plate Oligo	Standard Desalting	Quantity Only	0.2
Plate 7	A06	30940_0054	CCGATCAGAGGCATCCTGAATAGACGGCTTCAGCTTCCCGATATCCGACGGTAGTGTNNNNNNNNGACGGCTCTCGAAGAA	200 picomole Ultramer DNA Plate Oligo	Standard Desalting	Quantity Only	0.2
Plate 7	A07	31023_0055	GCTCGAAGAGAAATGACTCGATTTAGGGCTTCAGCTTCCCGATATCCGACGGTAGTGTNNNNNNNNAAGGTGAGAGATCGAA	200 picomole Ultramer DNA Plate Oligo	Standard Desalting	Quantity Only	0.2
Plate 7	A08	31036_0056_SNP_a	GCTTTCTCTGGATTTGAATGCCACTGCTTCAGCTTCCCGATATCCGACGGTAGTGTNNNNNNNNCAGCATCAATCCTCCACC	200 picomole Ultramer DNA Plate Oligo	Standard Desalting	Quantity Only	0.2
Plate 7	A09	31230_0057_SNP_a	CCCAAGAAGAGACTGCAGACCCCGTCAAGCTTCAGCTTCCCGATATCCGACGGTAGTGTNNNNNNNNCAGGAAGTGTTTCGAC	200 picomole Ultramer DNA Plate Oligo	Standard Desalting	Quantity Only	0.2
Plate 7	A10	31615_0058	GCAGAGTGTGGGTTCGCAACCTCTTCAGCTTCCCGATATCCGACGGTAGTGTNNNNNNNNTTCGTTTGTTTTAGTTTCTTAGC	200 picomole Ultramer DNA Plate Oligo	Standard Desalting	Quantity Only	0.2
Plate 7	A11	31714_0060_SNP_a	GAAGATGAAGTGTTGAAAATTTTGTCGACCTTCAGCTTCCCGATATCCGACGGTAGTGTNNNNNNNNTTGAAGGGTGACTTTG	200 picomole Ultramer DNA Plate Oligo	Standard Desalting	Quantity Only	0.2
Plate 7	A12	32108_0061	GCCTCGAAATTTTGAAGCCCAACTAATCCTTCAGCTTCCCGATATCCGACGGTAGTGTNNNNNNNNTTGGGGATTAGGGTTTT	200 picomole Ultramer DNA Plate Oligo	Standard Desalting	Quantity Only	0.2
Plate 7	B01	32189_0079	GACCATGACTTTTTCGGTTATGGGCCTTCAGCTTCCCGATATCCGACGGTAGTGTNNNNNNNNTGGCGAAGTGGTGTATG	200 picomole Ultramer DNA Plate Oligo	Standard Desalting	Quantity Only	0.2
Plate 7	B02	32220	GAGTGCACAAAACTCACTATTCTTCAGCTTCCCGATATCCGACGGTAGTGTNNNNNNNNCTGAGAGAGAGAGAGAGAGAGAGA	200 picomole Ultramer DNA Plate Oligo	Standard Desalting	Quantity Only	0.2
Plate 7	B03	32243_0064	GTGTGTTTGCGCAATTTATGGGTTATCTTCTTCAGCTTCCCGATATCCGACGGTAGTGTNNNNNNNNTGGAGCTTCTTTTGGG	200 picomole Ultramer DNA Plate Oligo	Standard Desalting	Quantity Only	0.2
Plate 7	B04	32502_0065	GCCACAATGCCACTATTGACTTCAGCTTCCCGATATCCGACGGTAGTGTNNNNNNNNTTTTAGTTTCTTAGCCATTTGTTCTT	200 picomole Ultramer DNA Plate Oligo	Standard Desalting	Quantity Only	0.2
Plate 7	B05	32506_0066	GCGAGAGTGATGGCCACAATGCCCTTCAGCTTCCCGATATCCGACGGTAGTGTNNNNNNNNGTTTGTGATATATTCGTTT	200 picomole Ultramer DNA Plate Oligo	Standard Desalting	Quantity Only	0.2
Plate 7	B06	32577_0067_SNP_a	CTTCGTTGTTGAGAACGGAGGGCAAGTTTCTTCAGCTTCCCGATATCCGACGGTAGTGTNNNNNNNNGAAACGAGAAAACAAG	200 picomole Ultramer DNA Plate Oligo	Standard Desalting	Quantity Only	0.2
Plate 7	B07	32802_0068	GAATTAGGGTTCTTCATCAGTCGCTAATCCTTCAGCTTCCCGATATCCGACGGTAGTGTNNNNNNNNAAAGAGAGAGATGAAG	200 picomole Ultramer DNA Plate Oligo	Standard Desalting	Quantity Only	0.2
Plate 7	B08	32842_0069	GTGAGTTAAGAAGAGATCTCATGAGACTTCAGCTTCCCGATATCCGACGGTAGTGTNNNNNNNNGGCTAAGGAGGTGCTTGG	200 picomole Ultramer DNA Plate Oligo	Standard Desalting	Quantity Only	0.2
Plate 7	B09	33039_0070_SNP_a	AAGAACAAGACCGGTTTCTTCCCCTTCAGCTTCCCGATATCCGACGGTAGTGTNNNNNNNNGATTGATCACATGTGGTT	200 picomole Ultramer DNA Plate Oligo	Standard Desalting	Quantity Only	0.2
Plate 7	B10	33085_0071	CGTCTCGAAATTACACTCACTTTTGGCTTCAGCTTCCCGATATCCGACGGTAGTGTNNNNNNNNTTTGATCTCTCTCTCTCTC	200 picomole Ultramer DNA Plate Oligo	Standard Desalting	Quantity Only	0.2
Plate 7	B11	33137_0073_SNP_a	GCATGGTGGATCTATTCATGGTCATGTCTTCAGCTTCCCGATATCCGACGGTAGTGTNNNNNNNNCTACGGTAGTTTATCTTA	200 picomole Ultramer DNA Plate Oligo	Standard Desalting	Quantity Only	0.2
Plate 7	B12	33254_0080	GAGGGTAAAAAAGTCCAAATAAAAAGGACTTCAGCTTCCCGATATCCGACGGTAGTGTNNNNNNNNCAAATCATGGAAGGGG	200 picomole Ultramer DNA Plate Oligo	Standard Desalting	Quantity Only	0.2
Plate 7	C01	33326_0074	GCTGCTGTCGGAATGAAGCAAATCATGGACTTCAGCTTCCCGATATCCGACGGTAGTGTNNNNNNNNACGTGAGACAGACATA	200 picomole Ultramer DNA Plate Oligo	Standard Desalting	Quantity Only	0.2
Plate 7	C02	33358_0057	GGAGGGTCACAGAGAGGAGGATTAGAAGGCTTCAGCTTCCCGATATCCGACGGTAGTGTNNNNNNNNCAACAGTCCCAAAGAG	200 picomole Ultramer DNA Plate Oligo	Standard Desalting	Quantity Only	0.2
Plate 7	C03	33403_0078_SNP_a	CTCAGGTTATGAACTTATTCATAAACTGCCTTCAGCTTCCCGATATCCGACGGTAGTGTNNNNNNNNGAACTCCGGGATATTG	200 picomole Ultramer DNA Plate Oligo	Standard Desalting	Quantity Only	0.2
Plate 7	C04	33424_0079	GTGGACGAGAAGTGACAGCGATGGCACCTTCAGCTTCCCGATATCCGACGGTAGTGTNNNNNNNNCACATACAAAGGAAGAG	200 picomole Ultramer DNA Plate Oligo	Standard Desalting	Quantity Only	0.2
Plate 7	C05	33544_0080	GCTGACTCGATGTTGATCGGGTGCTTCAGCTTCCCGATATCCGACGGTAGTGTNNNNNNNNATTCGAGTACAAGAGAATCGAG	200 picomole Ultramer DNA Plate Oligo	Standard Desalting	Quantity Only	0.2
Plate 7	C06	33633_0081_SNP_a	CATAAGGTCTTGGAGGTGGAGGTCTTCAGCTTCCCGATATCCGACGGTAGTGTNNNNNNNNCCCAAAATAAATAAAAT	200 picomole Ultramer DNA Plate Oligo	Standard Desalting	Quantity Only	0.2
Plate 7	C07	33659_0082	GACAGTGTGGTGATAGAGGACAAGGTTCTTCAGCTTCCCGATATCCGACGGTAGTGTNNNNNNNNATGTGTTGGGAGGCTG	200 picomole Ultramer DNA Plate Oligo	Standard Desalting	Quantity Only	0.2
Plate 7	C08	33993_0082_SNP_a	ACCTAAATTCTGACACAACTGTAACACACCTTCAGCTTCCCGATATCCGACGGTAGTGTNNNNNNNNGGGCTTAAACTAGGTT	200 picomole Ultramer DNA Plate Oligo	Standard Desalting	Quantity Only	0.2
Plate 7	C09	34271_0083_SNP_a	AAATATGCCTAATTCTGCAAAAGCCTTCAGCTTCCCGATATCCGACGGTAGTGTNNNNNNNNGGGATAGAAGTTGGATTGAGG	200 picomole Ultramer DNA Plate Oligo	Standard Desalting	Quantity Only	0.2
Plate 7	C10	34558_0084	GCGTTTTTCCTTTTGGTTATTTTCGGGCTTCAGCTTCCCGATATCCGACGGTAGTGTNNNNNNNNATTAGCTCGGGATGAA	200 picomole Ultramer DNA Plate Oligo	Standard Desalting	Quantity Only	0.2
Plate 7	C11	34829_0086	TCATATAACGTAGAAGTACCTAAATTTGCTTCAGCTTCCCGATATCCGACGGTAGTGTNNNNNNNNTGGCGAGTTTAGAGGC	200 picomole Ultramer DNA Plate Oligo	Standard Desalting	Quantity Only	0.2
Plate 7	C12	34890_0090	GGAGCTCGAGTTTTGAGACGTTGTCTTGCTTCAGCTTCCCGATATCCGACGGTAGTGTNNNNNNNNATCTTACCCACATAAC	200 picomole Ultramer DNA Plate Oligo	Standard Desalting	Quantity Only	0.2
Plate 7	D01	35001_0091	TGGTGTGAATCTCTGTCTCCTTCAGCTTCCCGATATCCGACGGTAGTGTNNNNNNNNCTTCTTCTTCTTCTTCTTCCTCTT	200 picomole Ultramer DNA Plate Oligo	Standard Desalting	Quantity Only	0.2
Plate 7	D02	35091_0092	GGGCCTTTTGGTCTTTTGCTTCAGCTTCCCGATATCCGACGGTAGTGTNNNNNNNNCAATGGATTTCTAGTGTTTATCTTCTC	200 picomole Ultramer DNA Plate Oligo	Standard Desalting	Quantity Only	0.2
Plate 7	D03	35201_0093	CGTCGAGAAGACGGCAATCTAGTGAGCTTCAGCTTCCCGATATCCGACGGTAGTGTNNNNNNNNGGGAGCTGGAGGCAGAGTG	200 picomole Ultramer DNA Plate Oligo	Standard Desalting	Quantity Only	0.2
Plate 7	D04	35243_0094	CGTCTTTCCATGAAGATGTTGGTTCAAGCCTTCAGCTTCCCGATATCCGACGGTAGTGTNNNNNNNNGGTAGTGAAGTGAAGT	200 picomole Ultramer DNA Plate Oligo	Standard Desalting	Quantity Only	0.2
Plate 7	D05	35379_0095_SNP_a	GGCAAAAGTCATTAGAAGTTATAACCATCTTCAGCTTCCCGATATCCGACGGTAGTGTNNNNNNNNGAGAGAATCTTCTGGTT	200 picomole Ultramer DNA Plate Oligo	Standard Desalting	Quantity Only	0.2
Plate 7	D06	35425_0096	CTCTGATCTTTATTATGAACGATTACATGCTTCAGCTTCCCGATATCCGACGGTAGTGTNNNNNNNNTTCTTCTCACCTCCAC	200 picomole Ultramer DNA Plate Oligo	Standard Desalting	Quantity Only	0.2
Plate 7	D07	35544_0097_SNP_a	CAATGGTTACGAGGAGGGAGTGGAGCTTCAGCTTCCCGATATCCGACGGTAGTGTNNNNNNNNGTTGTTCAGGCTGATCGTGG	200 picomole Ultramer DNA Plate Oligo	Standard Desalting	Quantity Only	0.2
Plate 7	D08	35556_0098	TCCTCCAAGCTAACACAGCTTCAGCTTCCCGATATCCGACGGTAGTGTNNNNNNNNCCCTACATTTGTTGATGTACCAGGGTC	200 picomole Ultramer DNA Plate Oligo	Standard Desalting	Quantity Only	0.2
Plate 7	D09	35559_0061	GTTCGGTTCGGCTCTCTTTTCTCCCTTCAGCTTCCCGATATCCGACGGTAGTGTNNNNNNNNTAAAAAATAAATTGTTTCCGC	200 picomole Ultramer DNA Plate Oligo	Standard Desalting	Quantity Only	0.2
Plate 7	D10	35655_0100	GACTAGGCCAAGTGTGTCAGTTGCTTCAGCTTCCCGATATCCGACGGTAGTGTNNNNNNNNTGGGTGTTCCGGATTTAGAGG	200 picomole Ultramer DNA Plate Oligo	Standard Desalting	Quantity Only	0.2
Plate 7	D11	35661_0101	GGCAGACTAGGGCTCCTAGTTATCTTCAGCTTCCCGATATCCGACGGTAGTGTNNNNNNNNGATGCATTTGTTCGTGACTTG	200 picomole Ultramer DNA Plate Oligo	Standard Desalting	Quantity Only	0.2
Plate 7	D12	35760_0102	TGCAGACGACGGCGACTGCCCAAGTCTTCAGCTTCCCGATATCCGACGGTAGTGTNNNNNNNNCCATAGCCACTGAGAAGAAA	200 picomole Ultramer DNA Plate Oligo	Standard Desalting	Quantity Only	0.2
Plate 7	E01	35831_0103	GCAAGGAGCATTTTCAGTGAACCCCTTCAGCTTCCCGATATCCGACGGTAGTGTNNNNNNNNACCCATTTGCTTAATCTTCAA	200 picomole Ultramer DNA Plate Oligo	Standard Desalting	Quantity Only	0.2
Plate 7	E02	35839_0104	GCCAAGAAGAGACGATATCTTATGGCGCTTCAGCTTCCCGATATCCGACGGTAGTGTNNNNNNNNGCTAGTTAATTTTTGTTG	200 picomole Ultramer DNA Plate Oligo	Standard Desalting	Quantity Only	0.2
Plate 7	E03	35885_0105	GCCGATGGTAGTGAAGTGAACCAAGGTTGCTTCAGCTTCCCGATATCCGACGGTAGTGTNNNNNNNNAGAGAGCCATAGAGAG	200 picomole Ultramer DNA Plate Oligo	Standard Desalting	Quantity Only	0.2
Plate 7	E04	35896_0106	GCAATGCGTGTACTTCGGCTTCAGGACTTCAGCTTCCCGATATCCGACGGTAGTGTNNNNNNNNACAAAGAATCACACATAA	200 picomole Ultramer DNA Plate Oligo	Standard Desalting	Quantity Only	0.2
Plate 7	E05	35938_0107	GTGGGCAATTTGGTCAAGATATAGATGTGCTTCAGCTTCCCGATATCCGACGGTAGTGTNNNNNNNNCACAAGTAAGTAACTC	200 picomole Ultramer DNA Plate Oligo	Standard Desalting	Quantity Only	0.2
Plate 7	E06	35997_0108	GAGTGGGTTCTTGTCAATCCATGCTTCAGCTTCCCGATATCCGACGGTAGTGTNNNNNNNNGGGGCGGAGAACAAACG	200 picomole Ultramer DNA Plate Oligo	Standard Desalting	Quantity Only	0.2
Plate 7	E07	36021_0109	TTCATGCAGTTTCACCGATCCCCAACCCTTCAGCTTCCCGATATCCGACGGTAGTGTNNNNNNNNTGCTCCGATTTACATTAC	200 picomole Ultramer DNA Plate Oligo	Standard Desalting	Quantity Only	0.2
Plate 7	E08	36040_0110	GAACTTCTAGATAACATGTCAAATCTACCTTCAGCTTCCCGATATCCGACGGTAGTGTNNNNNNNNGGTTTGTTTATGCTTCG	200 picomole Ultramer DNA Plate Oligo	Standard Desalting	Quantity Only	0.2
Plate 7	E09	36053_0111	GAAGCTTTGGTTACTTCTTTTCGTTTTCTTCAGCTTCCCGATATCCGACGGTAGTGTNNNNNNNNGGATCTGAATTGAGATTG	200 picomole Ultramer DNA Plate Oligo	Standard Desalting	Quantity Only	0.2
Plate 7	E10	36055_0112_SNP_a	GCTAACTACTCCACGAAGGACCTTCAGCTTCCCGATATCCGACGGTAGTGTNNNNNNNNTCCTTTCGCTTTTCCTTTTCCACC	200 picomole Ultramer DNA Plate Oligo	Standard Desalting	Quantity Only	0.2
Plate 7	E11	36267_0114	GTCTGATTGAGACGATGGATGAAGCGGTCTTCAGCTTCCCGATATCCGACGGTAGTGTNNNNNNNNAGCGGTGGAAGATTCG	200 picomole Ultramer DNA Plate Oligo	Standard Desalting	Quantity Only	0.2
Plate 7	E12	36330_0115	GTGTGTAGATACTAACTTTATAATTCCCCTTCAGCTTCCCGATATCCGACGGTAGTGTNNNNNNNNGTTACTCATTTTGAAGG	200 picomole Ultramer DNA Plate Oligo	Standard Desalting	Quantity Only	0.2
Plate 7	F01	36333_0116	CTCCATGAAAGGTGGCTACTTTCCGGCGCTTCAGCTTCCCGATATCCGACGGTAGTGTNNNNNNNNGATGAAGAGTGGCGTTG	200 picomole Ultramer DNA Plate Oligo	Standard Desalting	Quantity Only	0.2
Plate 7	F02	36362_0117	CAGAGATGAGATCTTTAAGTTTCTTGTTGCTTCAGCTTCCCGATATCCGACGGTAGTGTNNNNNNNNTCCTATTAGCTCAATA	200 picomole Ultramer DNA Plate Oligo	Standard Desalting	Quantity Only	0.2
Plate 7	F03	36390_0118	GATCTTGGAAAAGGCGGTGGATTCACTTCCTTCAGCTTCCCGATATCCGACGGTAGTGTNNNNNNNNTAACTAAGCAGAAGAG	200 picomole Ultramer DNA Plate Oligo	Standard Desalting	Quantity Only	0.2
Plate 7	F04	36439_0119	GCCGTCGCCGAGATATGTCGGAGTATTTGCTTCAGCTTCCCGATATCCGACGGTAGTGTNNNNNNNNATAGAGACGAAGCGGA	200 picomole Ultramer DNA Plate Oligo	Standard Desalting	Quantity Only	0.2
Plate 7	F05	36573_0121	GGCGAAATCGTCCGTAAATGCCTCGCTCGCTTCAGCTTCCCGATATCCGACGGTAGTGTNNNNNNNNAAAAAACGAATCGGAA	200 picomole Ultramer DNA Plate Oligo	Standard Desalting	Quantity Only	0.2
Plate 7	F06	36627_0122	CACTTGTCTCAATTTGGCAATTGGCGTTGCTTCAGCTTCCCGATATCCGACGGTAGTGTNNNNNNNNATCCAAAATCACAAAA	200 picomole Ultramer DNA Plate Oligo	Standard Desalting	Quantity Only	0.2
Plate 7	F07	36642_0123	CAATAGACAAGCTTTCAATCTTCAATTGCCTTCAGCTTCCCGATATCCGACGGTAGTGTNNNNNNNNATTGTGTGTCGTCGGG	200 picomole Ultramer DNA Plate Oligo	Standard Desalting	Quantity Only	0.2
Plate 7	F08	36706_0124_SNP_a	GCTGATCAAGAGGCAGATCACTCATTTCACTTCAGCTTCCCGATATCCGACGGTAGTGTNNNNNNNNTACAAAACAAATCCAA	200 picomole Ultramer DNA Plate Oligo	Standard Desalting	Quantity Only	0.2
Plate 7	F09	36738_0125	GTCAGATCGGAATCGTCCGTCGGTGGTCTTCAGCTTCCCGATATCCGACGGTAGTGTNNNNNNNNACACACAGAACACAAC	200 picomole Ultramer DNA Plate Oligo	Standard Desalting	Quantity Only	0.2
Plate 7	F10	36745_0126	GCAGGGACAAGCAAGAGTAGTGGTGCTTCAGCTTCCCGATATCCGACGGTAGTGTNNNNNNNNCAGGAAGAGACTGAACAA	200 picomole Ultramer DNA Plate Oligo	Standard Desalting	Quantity Only	0.2
Plate 7	F11	36806_0127	CCTTACAGGGTCCTGAAGAACAGGTTTGCTTCAGCTTCCCGATATCCGACGGTAGTGTNNNNNNNNCAGACCTAAACATAAG	200 picomole Ultramer DNA Plate Oligo	Standard Desalting	Quantity Only	0.2
Plate 7	F12	36829_0128_SNP_a	GTGGTCACAATTGGAGAAAGAAGAGGTCGCTTCAGCTTCCCGATATCCGACGGTAGTGTNNNNNNNNGCCTATAAATACGTAC	200 picomole Ultramer DNA Plate Oligo	Standard Desalting	Quantity Only	0.2
Plate 7	G01	36885_0129	GGGCCTATTTTGTTAATTATGTGGCCCCTTCAGCTTCCCGATATCCGACGGTAGTGTNNNNNNNNGCGTCTCTGTAACCGATT	200 picomole Ultramer DNA Plate Oligo	Standard Desalting	Quantity Only	0.2
Plate 7	G02	36897_0130	GCACTTTGATGTGTGTGTGTGTGCTTCAGCTTCCCGATATCCGACGGTAGTGTNNNNNNNNCAAGAAGGCTCAGGATC	200 picomole Ultramer DNA Plate Oligo	Standard Desalting	Quantity Only	0.2
Plate 7	G03	36918_0131	CGATCCTTTGGTGGATTGAGCAACACGTACTTCAGCTTCCCGATATCCGACGGTAGTGTNNNNNNNNCAACCAAAGGCAAGAC	200 picomole Ultramer DNA Plate Oligo	Standard Desalting	Quantity Only	0.2
Plate 7	G04	36920_0132	GAGATCTAAAGGAGAATAAGGAGAGACCCTTCAGCTTCCCGATATCCGACGGTAGTGTNNNNNNNNGAGTGGTCAAAAACATC	200 picomole Ultramer DNA Plate Oligo	Standard Desalting	Quantity Only	0.2
Plate 7	G05	36928_0133_SNP_a	GACTGGTAGCGAGACATTGCACCGTTACCTTCAGCTTCCCGATATCCGACGGTAGTGTNNNNNNNNACACGTTACAACAGGAA	200 picomole Ultramer DNA Plate Oligo	Standard Desalting	Quantity Only	0.2
Plate 7	G06	36929_0134	GGAAGTGTTTGGCGCGTCTGGGTTATACCCTTCAGCTTCCCGATATCCGACGGTAGTGTNNNNNNNNCGTCATCAAAGGAATG	200 picomole Ultramer DNA Plate Oligo	Standard Desalting	Quantity Only	0.2
Plate 7	G07	36944_0135	GGGTGGCCTTTCTTGAGGTGACCTTCAGCTTCCCGATATCCGACGGTAGTGTNNNNNNNNTGTTCTTTCTGTTTGTTAGGTGT	200 picomole Ultramer DNA Plate Oligo	Standard Desalting	Quantity Only	0.2
Plate 7	G08	36971_0136	GTTTTCTGGTGTTTCGGCCGGAATTGAAGCTTCAGCTTCCCGATATCCGACGGTAGTGTNNNNNNNNCAAAGATTGATGAACC	200 picomole Ultramer DNA Plate Oligo	Standard Desalting	Quantity Only	0.2
Plate 7	G09	37023_0137	GACGCTGCGAGTAGCTTGTATATGCTTCAGCTTCCCGATATCCGACGGTAGTGTNNNNNNNNGGGTTTAGGATTAATGG	200 picomole Ultramer DNA Plate Oligo	Standard Desalting	Quantity Only	0.2
Plate 7	G10	37035_0138	TTCGTCGTATAGATCTGAATCCCTCCGCTTCAGCTTCCCGATATCCGACGGTAGTGTNNNNNNNNCCTCAGATCAGATCAGTT	200 picomole Ultramer DNA Plate Oligo	Standard Desalting	Quantity Only	0.2
Plate 7	G11	37052_0139	GTTTGCTGCAAATGCAGATCTGATTTTGCTTCAGCTTCCCGATATCCGACGGTAGTGTNNNNNNNNACAAACACATTCCAAAC	200 picomole Ultramer DNA Plate Oligo	Standard Desalting	Quantity Only	0.2
Plate 7	G12	37078_0140	CTCTGCTTCAAGTGCGTCCTTCAGCTTCCCGATATCCGACGGTAGTGTNNNNNNNNCTGGTGCTGGTTTTTCTTGGCTTTGCT	200 picomole Ultramer DNA Plate Oligo	Standard Desalting	Quantity Only	0.2
Plate 7	H01	37079_0141	ACAGTAATAGAAACAACCTAAATGGAGCTCTTCAGCTTCCCGATATCCGACGGTAGTGTNNNNNNNNGTTTTTGCATTTTTCT	200 picomole Ultramer DNA Plate Oligo	Standard Desalting	Quantity Only	0.2
Plate 7	H02	37126_0142	GAACCAAGTAATGACTTACGTGCAACTTCAGCTTCCCGATATCCGACGGTAGTGTNNNNNNNNGGTACGAACTTGCTTGTCC	200 picomole Ultramer DNA Plate Oligo	Standard Desalting	Quantity Only	0.2
Plate 7	H03	37130_0143_SNP_a	AGCTCACTGAGATGAAAAGATCTCTGTACTTCAGCTTCCCGATATCCGACGGTAGTGTNNNNNNNNGAAATTTGAAGAGTGAC	200 picomole Ultramer DNA Plate Oligo	Standard Desalting	Quantity Only	0.2
Plate 7	H04	37195_0144	GTTGCGGTTACAGGTTGTTGATGTAGTAGCTTCAGCTTCCCGATATCCGACGGTAGTGTNNNNNNNNGATCATGTTATGGCTG	200 picomole Ultramer DNA Plate Oligo	Standard Desalting	Quantity Only	0.2
Plate 7	H05	37301_0145	GTTACGGAGGCTAGGGCTGATGGGCCTTCAGCTTCCCGATATCCGACGGTAGTGTNNNNNNNNTCCTTTTAAAATAGTCAAAC	200 picomole Ultramer DNA Plate Oligo	Standard Desalting	Quantity Only	0.2
Plate 7	H06	37359_0147	CCACAAGTACTCATGACATTTGAGGTTCCTTCAGCTTCCCGATATCCGACGGTAGTGTNNNNNNNNGCTATAGGAGTGAAGAG	200 picomole Ultramer DNA Plate Oligo	Standard Desalting	Quantity Only	0.2
Plate 7	H07	37609_0148	TTTTCCTTTGATCTTGAGACCATGCCTTCAGCTTCCCGATATCCGACGGTAGTGTNNNNNNNNGGCCTTTTGCCAAGTGTATC	200 picomole Ultramer DNA Plate Oligo	Standard Desalting	Quantity Only	0.2
Plate 7	H08	37627_0149	GTACATCCTTCTAAACGAGGGACCAAGACCTTCAGCTTCCCGATATCCGACGGTAGTGTNNNNNNNNTAGAAACTTAAACCGG	200 picomole Ultramer DNA Plate Oligo	Standard Desalting	Quantity Only	0.2
Plate 7	H09	37649_0150	GTCTCTACAGATATTTTGGACGAGAAGCTTCAGCTTCCCGATATCCGACGGTAGTGTNNNNNNNNGTTTGCTACGTGTAAACT	200 picomole Ultramer DNA Plate Oligo	Standard Desalting	Quantity Only	0.2
Plate 7	H10	37682_0086	GCACAGATTCTGGTCTCTCCTTCAGCTTCCCGATATCCGACGGTAGTGTNNNNNNNNGCCACACTCATGACTTTGATTGTTTT	200 picomole Ultramer DNA Plate Oligo	Standard Desalting	Quantity Only	0.2
Plate 7	H11	37703_0087	GCCTGCTAGTTTGGAGGAGAGTATTATACCTTCAGCTTCCCGATATCCGACGGTAGTGTNNNNNNNNATACCATTTCATACCC	200 picomole Ultramer DNA Plate Oligo	Standard Desalting	Quantity Only	0.2
Plate 7	H12	37932_0152	GCAGAGAATTAAAGAAATGATTGATGATGCTTCAGCTTCCCGATATCCGACGGTAGTGTNNNNNNNNAGAGAGAGAGAGGAGT	200 picomole Ultramer DNA Plate Oligo	Standard Desalting	Quantity Only	0.2
Plate 8	A01	37943_0153	GCATTGGTTTTGAGTGTGATCGGTGCAGCTTCAGCTTCCCGATATCCGACGGTAGTGTNNNNNNNNCTTTGGTGAATCCTCC	200 picomole Ultramer DNA Plate Oligo	Standard Desalting	Quantity Only	0.2
Plate 8	A02	38028_0154	ACTTTTGGTGAAGATGGTGAGCAATGGGCTTCAGCTTCCCGATATCCGACGGTAGTGTNNNNNNNNTAAAACACACAAAACC	200 picomole Ultramer DNA Plate Oligo	Standard Desalting	Quantity Only	0.2
Plate 8	A03	38030_0155	GTGATAAGTTACATAAGTAATAGTCGGTTCTTCAGCTTCCCGATATCCGACGGTAGTGTNNNNNNNNGTAGGTTGGTGCCACT	200 picomole Ultramer DNA Plate Oligo	Standard Desalting	Quantity Only	0.2
Plate 8	A04	38044_0156	TTCCCCCAACTCTGCTCTTCGCTTCAGCTTCCCGATATCCGACGGTAGTGTNNNNNNNNTGCCAGTCACGGTTATCAGTCT	200 picomole Ultramer DNA Plate Oligo	Standard Desalting	Quantity Only	0.2
Plate 8	A05	38045_0157	GTGGGTGGTTCTTGTGGTTTCCGAACTTCAGCTTCCCGATATCCGACGGTAGTGTNNNNNNNNAAACTCAAGAATCGATC	200 picomole Ultramer DNA Plate Oligo	Standard Desalting	Quantity Only	0.2
Plate 8	A06	38065_0158	GCTCGTTGATGTTTGTAATTGGTCTGGTGCTTCAGCTTCCCGATATCCGACGGTAGTGTNNNNNNNNCTGTTATGACCGTTCT	200 picomole Ultramer DNA Plate Oligo	Standard Desalting	Quantity Only	0.2
Plate 8	A07	38115_0159	GATAGATTTTTATGGAAGGAGTGGTGCTTCAGCTTCCCGATATCCGACGGTAGTGTNNNNNNNNTGTGTGTGTTGTGTTG	200 picomole Ultramer DNA Plate Oligo	Standard Desalting	Quantity Only	0.2
Plate 8	A08	38119_0160	GAGCAGACAAAAACAGGGGAAAATGCTTCAGCTTCCCGATATCCGACGGTAGTGTNNNNNNNNGGCTGCTAACAAAAAA	200 picomole Ultramer DNA Plate Oligo	Standard Desalting	Quantity Only	0.2
Plate 8	A09	38155_0161	GAGTTTTGTAGATTGTGGATGTGATATCTCTTCAGCTTCCCGATATCCGACGGTAGTGTNNNNNNNNCACAGAAACTTAAACT	200 picomole Ultramer DNA Plate Oligo	Standard Desalting	Quantity Only	0.2
Plate 8	A10	38191_0162	GGGAACCGGTCTTGCATCGTTTTGGTACCTTCAGCTTCCCGATATCCGACGGTAGTGTNNNNNNNNCCGTTGAGTCTCGGTGT	200 picomole Ultramer DNA Plate Oligo	Standard Desalting	Quantity Only	0.2
Plate 8	A11	38220_0163	GTCTCATACTATCTCCCGTGTGTCTTCAGCTTCCCGATATCCGACGGTAGTGTNNNNNNNNGTTGTTGTTGTTGTTGTTTT	200 picomole Ultramer DNA Plate Oligo	Standard Desalting	Quantity Only	0.2
Plate 8	A12	38221_0164	GAGACAGAGAAGAGAACGTGGGTTCCCTTCAGCTTCCCGATATCCGACGGTAGTGTNNNNNNNNCAAAAGATGAAGAGAGAG	200 picomole Ultramer DNA Plate Oligo	Standard Desalting	Quantity Only	0.2
Plate 8	B01	38299_0063	GAAGAGAAAATTGGAAGCAAGAAAGAAAGCTTCAGCTTCCCGATATCCGACGGTAGTGTNNNNNNNNGAAACATTAGTCAAGC	200 picomole Ultramer DNA Plate Oligo	Standard Desalting	Quantity Only	0.2
Plate 8	B02	38349_0168	GCCGAGAAGGTTGAAATCGGAGGTTTCTTCAGCTTCCCGATATCCGACGGTAGTGTNNNNNNNNTGACGGTAGTAGTAGCTGG	200 picomole Ultramer DNA Plate Oligo	Standard Desalting	Quantity Only	0.2
Plate 8	B03	38510_0169	GAACCATGGTATTGGCAGTGACGAAGGAGCTTCAGCTTCCCGATATCCGACGGTAGTGTNNNNNNNNTGTGTATACAAGAAGT	200 picomole Ultramer DNA Plate Oligo	Standard Desalting	Quantity Only	0.2
Plate 8	B04	38522_0170	GGATCTGATCGTGATCGGTTTCTTAGCTTCAGCTTCCCGATATCCGACGGTAGTGTNNNNNNNNTGGCGACTTCTGGTCTTG	200 picomole Ultramer DNA Plate Oligo	Standard Desalting	Quantity Only	0.2
Plate 8	B05	38530_0171	GAAGAGTGAACGAACTATCACTTTCTCTCCTTCAGCTTCCCGATATCCGACGGTAGTGTNNNNNNNNGAAGATCATCAAAAGA	200 picomole Ultramer DNA Plate Oligo	Standard Desalting	Quantity Only	0.2
Plate 8	B06	38549_0172	GTATGGCCAAGTTGAAGATGCACAACTTCAGCTTCCCGATATCCGACGGTAGTGTNNNNNNNNGGGGTGCTGGTCTTGA	200 picomole Ultramer DNA Plate Oligo	Standard Desalting	Quantity Only	0.2
Plate 8	B07	38584_0173	CGGTTACTTGATAGGTTTTTGTCATTGAGCTTCAGCTTCCCGATATCCGACGGTAGTGTNNNNNNNNTGGTGGTGTACCGAAG	200 picomole Ultramer DNA Plate Oligo	Standard Desalting	Quantity Only	0.2
Plate 8	B08	38601_0174	GCTATAGATCTTATCTGCAATTTCTCCTTCAGCTTCCCGATATCCGACGGTAGTGTNNNNNNNNCGTTTCCGTGTTTGAGGTG	200 picomole Ultramer DNA Plate Oligo	Standard Desalting	Quantity Only	0.2
Plate 8	B09	38641_0175	GTCCGCCGTTGATCGTCCGGATCTTCAGCTTCCCGATATCCGACGGTAGTGTNNNNNNNNTTTCTCTTCCTGTGGTGGTGGTG	200 picomole Ultramer DNA Plate Oligo	Standard Desalting	Quantity Only	0.2
Plate 8	B10	38753_0176	GGGAATCCCATGCCGGGGTGATATTCTTCAGCTTCCCGATATCCGACGGTAGTGTNNNNNNNNGTTGTTGTTGTTGGGTG	200 picomole Ultramer DNA Plate Oligo	Standard Desalting	Quantity Only	0.2
Plate 8	B11	38797_0177	CGCAAATTGATCTCCTTCTTGGCTGCCTTCAGCTTCCCGATATCCGACGGTAGTGTNNNNNNNNGGTGGTTGTTTCATCG	200 picomole Ultramer DNA Plate Oligo	Standard Desalting	Quantity Only	0.2
Plate 8	B12	38860_0178_SNP_a	GATGATATTGTGTTAAAGAACTCGAAGACTTCAGCTTCCCGATATCCGACGGTAGTGTNNNNNNNNACAAGGCGAAATCGAT	200 picomole Ultramer DNA Plate Oligo	Standard Desalting	Quantity Only	0.2
Plate 8	C01	38962_0179	GTAAAGGAAGAGACTTGGAAGCCTAGCACTTCAGCTTCCCGATATCCGACGGTAGTGTNNNNNNNNCAGGAGAAAACATTGG	200 picomole Ultramer DNA Plate Oligo	Standard Desalting	Quantity Only	0.2
Plate 8	C02	38990_0180	CGACAGCGACATCGAAGCAATCAGATACCTTCAGCTTCCCGATATCCGACGGTAGTGTNNNNNNNNGTACCAAGCGAAGTCAG	200 picomole Ultramer DNA Plate Oligo	Standard Desalting	Quantity Only	0.2
Plate 8	C03	39003_0181	CAGGACTTAGGGAACCCCTCCAGTTCTTCAGCTTCCCGATATCCGACGGTAGTGTNNNNNNNNGTGTGTTATATAGTGAAAAG	200 picomole Ultramer DNA Plate Oligo	Standard Desalting	Quantity Only	0.2
Plate 8	C04	39007_0182	GTCCTTTGTAGTCTACGGCATCAGCCACCTTCAGCTTCCCGATATCCGACGGTAGTGTNNNNNNNNGCACACACAAAAAAAA	200 picomole Ultramer DNA Plate Oligo	Standard Desalting	Quantity Only	0.2
Plate 8	C05	39105_0183	GCTCGCTTTTGTGCTTTACGATGGCTTCAGCTTCCCGATATCCGACGGTAGTGTNNNNNNNNTCTGGCGGTAAGTGTG	200 picomole Ultramer DNA Plate Oligo	Standard Desalting	Quantity Only	0.2
Plate 8	C06	39189_0186	GATCTGATAGCTACAGAGAGATTGAGCTTCAGCTTCCCGATATCCGACGGTAGTGTNNNNNNNNGATTGGAAACAAGAAAAG	200 picomole Ultramer DNA Plate Oligo	Standard Desalting	Quantity Only	0.2
Plate 8	C07	39206_0187_SNP_a	TCAACGTTGGTGTGTGTAATGAGAGGCTTCAGCTTCCCGATATCCGACGGTAGTGTNNNNNNNNATACAAAAGAGGAAAGA	200 picomole Ultramer DNA Plate Oligo	Standard Desalting	Quantity Only	0.2
Plate 8	C08	39220_0188	GATGCTTTGGTGGGGGGATTTAAAAGATTCTTCAGCTTCCCGATATCCGACGGTAGTGTNNNNNNNNAACTTCAGAGATGGAG	200 picomole Ultramer DNA Plate Oligo	Standard Desalting	Quantity Only	0.2
Plate 8	C09	39221_0189	ATTCCTTCCATTGCTCCGGTTTGCCAATCTTCAGCTTCCCGATATCCGACGGTAGTGTNNNNNNNNGATGAGTGTTTGGTGCC	200 picomole Ultramer DNA Plate Oligo	Standard Desalting	Quantity Only	0.2
Plate 8	C10	39224_0190_SNP_a	ACTCAATTTCGAAGCTTTGTGTCTGTTCTTCAGCTTCCCGATATCCGACGGTAGTGTNNNNNNNNCATACATTCTCTAGTTCC	200 picomole Ultramer DNA Plate Oligo	Standard Desalting	Quantity Only	0.2
Plate 8	C11	39427_0192	GAAGGTGATGTGTATGTTGAAGAGGCTCTTCAGCTTCCCGATATCCGACGGTAGTGTNNNNNNNNCCTAATGGACCAAATGAA	200 picomole Ultramer DNA Plate Oligo	Standard Desalting	Quantity Only	0.2
Plate 8	C12	39446_0193	TTGCCGTTGATTTGGCGTCTCACTTTCCGCTTCAGCTTCCCGATATCCGACGGTAGTGTNNNNNNNNTAAATCGGTGCGGCGA	200 picomole Ultramer DNA Plate Oligo	Standard Desalting	Quantity Only	0.2
Plate 8	D01	39513_0194	CCGGCTCCAAGAACCTCGAACTTCAGCTTCCCGATATCCGACGGTAGTGTNNNNNNNNGCTTTCTTTAGTCTATTCTTGGGTT	200 picomole Ultramer DNA Plate Oligo	Standard Desalting	Quantity Only	0.2
Plate 8	D02	39533_0196	CGGTCGTTGTTGGCTGCTGTGGCATCTTCAGCTTCCCGATATCCGACGGTAGTGTNNNNNNNNGAAGGTTAAGTACCATATAG	200 picomole Ultramer DNA Plate Oligo	Standard Desalting	Quantity Only	0.2
Plate 8	D03	39534_0197	GATGTGACTGTGTAATAATATATATGTTGCTTCAGCTTCCCGATATCCGACGGTAGTGTNNNNNNNNGAAAAAAGCTTAAGTA	200 picomole Ultramer DNA Plate Oligo	Standard Desalting	Quantity Only	0.2
Plate 8	D04	39535_0198	ATTGCAATGCATCGACGACACCGGAGCTTCAGCTTCCCGATATCCGACGGTAGTGTNNNNNNNNGGATCTCAATATGTGTC	200 picomole Ultramer DNA Plate Oligo	Standard Desalting	Quantity Only	0.2
Plate 8	D05	39656_0088	CAGACAAAAGAGCAAAGACAGAGATGGCTTCAGCTTCCCGATATCCGACGGTAGTGTNNNNNNNNGGTGGCATCGTAGTGG	200 picomole Ultramer DNA Plate Oligo	Standard Desalting	Quantity Only	0.2
Plate 8	D06	39663_0199	AAATTGAGTTGTTTGTTGGGGGACATATTCTTCAGCTTCCCGATATCCGACGGTAGTGTNNNNNNNNCTTTGGTTTTAGTGGT	200 picomole Ultramer DNA Plate Oligo	Standard Desalting	Quantity Only	0.2
Plate 8	D07	40016_0201	GCCTCTCGGTGACGCGGGGCAAAGACTACTTCAGCTTCCCGATATCCGACGGTAGTGTNNNNNNNNAAGAACATAGGAGAGA	200 picomole Ultramer DNA Plate Oligo	Standard Desalting	Quantity Only	0.2
Plate 8	D08	40100_0202	TCGTCTACCAGAGATGGTGTTCCGGATCTTCAGCTTCCCGATATCCGACGGTAGTGTNNNNNNNNTACCTAAAAGTAGAGC	200 picomole Ultramer DNA Plate Oligo	Standard Desalting	Quantity Only	0.2
Plate 8	D09	40257_0203	TTAGTTTACCGTTCCCACGACTCGTCGGGCTTCAGCTTCCCGATATCCGACGGTAGTGTNNNNNNNNCGTAGATTACAACCGA	200 picomole Ultramer DNA Plate Oligo	Standard Desalting	Quantity Only	0.2
Plate 8	D10	40272_0204	GGATTGGATTGGAAGAAACAGAGAGACTTCAGCTTCCCGATATCCGACGGTAGTGTNNNNNNNNGGATTTGGTTACTATGAG	200 picomole Ultramer DNA Plate Oligo	Standard Desalting	Quantity Only	0.2
Plate 8	D11	40343_0090	GCTCATCGGATGACCGGCATTTTGAAAAACTTCAGCTTCCCGATATCCGACGGTAGTGTNNNNNNNNGTTTGTGCTATGGAGG	200 picomole Ultramer DNA Plate Oligo	Standard Desalting	Quantity Only	0.2
Plate 8	D12	40365_0205	GCATGTTCGAATAAATACATGGCTTGTTGCTTCAGCTTCCCGATATCCGACGGTAGTGTNNNNNNNNGCTTGCCCTGTGACAA	200 picomole Ultramer DNA Plate Oligo	Standard Desalting	Quantity Only	0.2
Plate 8	E01	40391_0206	GGAGCTCTGTTTTGGATTTCATGAAAATCCTTCAGCTTCCCGATATCCGACGGTAGTGTNNNNNNNNTTCTCCTTCTTCCTCT	200 picomole Ultramer DNA Plate Oligo	Standard Desalting	Quantity Only	0.2
Plate 8	E02	40396_0207	GCTCAGTGTTGCCTGAGACTTGAGTTTCTTCAGCTTCCCGATATCCGACGGTAGTGTNNNNNNNNAAGAAGAAACAAAATC	200 picomole Ultramer DNA Plate Oligo	Standard Desalting	Quantity Only	0.2
Plate 8	E03	40416_0208	GTTTAAACTAAAAGAGCGAGTCCCTAAACTTCAGCTTCCCGATATCCGACGGTAGTGTNNNNNNNNTGTTGCTGTTGCTGCTG	200 picomole Ultramer DNA Plate Oligo	Standard Desalting	Quantity Only	0.2
Plate 8	E04	40457_0209	GAGAGAAAGGTAAAGTAACAAGTCTCTCGCTTCAGCTTCCCGATATCCGACGGTAGTGTNNNNNNNNGAAAAATATCGACAGA	200 picomole Ultramer DNA Plate Oligo	Standard Desalting	Quantity Only	0.2
Plate 8	E05	40459_0210	GAATTGCGGTATTGAGCCTGTCGCTCTTCAGCTTCCCGATATCCGACGGTAGTGTNNNNNNNNACCTAATCATGCACAAGAC	200 picomole Ultramer DNA Plate Oligo	Standard Desalting	Quantity Only	0.2
Plate 8	E06	40497_0211	GCTGTTAGGTTTGGTTTCGCGGCTTCAGCTTCCCGATATCCGACGGTAGTGTNNNNNNNNTCGGAAAGCTCTTGATCGATTAG	200 picomole Ultramer DNA Plate Oligo	Standard Desalting	Quantity Only	0.2
Plate 8	E07	40507_0213	GCTTCCAGTGAGTGATGTTAGTAATGATCTTCAGCTTCCCGATATCCGACGGTAGTGTNNNNNNNNGGGAAGCTTTGTGTTTG	200 picomole Ultramer DNA Plate Oligo	Standard Desalting	Quantity Only	0.2
Plate 8	E08	40518_0214	GAGTCCGTCGTGACGGAGCTTCAGCTTCCCGATATCCGACGGTAGTGTNNNNNNNNGGTGGAGGTGAAGATGCGGCGG	200 picomole Ultramer DNA Plate Oligo	Standard Desalting	Quantity Only	0.2
Plate 8	E09	40524_0215	GCTTGTTTCGATGTGTTAGCTTCAGCTTCCCGATATCCGACGGTAGTGTNNNNNNNNTTTTTCTTCTCTTATAACTTGAAACG	200 picomole Ultramer DNA Plate Oligo	Standard Desalting	Quantity Only	0.2
Plate 8	E10	40529_0216	GGAGAGAGGTCACGTGACTTTTAGGGGAACTTCAGCTTCCCGATATCCGACGGTAGTGTNNNNNNNNGGAGATAACAATGAGG	200 picomole Ultramer DNA Plate Oligo	Standard Desalting	Quantity Only	0.2
Plate 8	E11	40629_0217	CGAGGACAAGAACCGTACCTTCAAACCTTCAGCTTCCCGATATCCGACGGTAGTGTNNNNNNNNGAGCCCGTACACAAGA	200 picomole Ultramer DNA Plate Oligo	Standard Desalting	Quantity Only	0.2
Plate 8	E12	40720_0218	CCTGTGGTAGTTTTCTGAAGTAGCTAAGCCTTCAGCTTCCCGATATCCGACGGTAGTGTNNNNNNNNTCTATCCTGTTGTGTG	200 picomole Ultramer DNA Plate Oligo	Standard Desalting	Quantity Only	0.2
Plate 8	F01	40727_0219	GCGTAAAGGAATTTGCTTCCTGGAAGAGCTTCAGCTTCCCGATATCCGACGGTAGTGTNNNNNNNNCAATTCCACACACACGA	200 picomole Ultramer DNA Plate Oligo	Standard Desalting	Quantity Only	0.2
Plate 8	F02	40877_0220	GGTGGAGTTGACAAAGATCGGGTTTTACGCTTCAGCTTCCCGATATCCGACGGTAGTGTNNNNNNNNGCTCATTGGTGCCTTG	200 picomole Ultramer DNA Plate Oligo	Standard Desalting	Quantity Only	0.2
Plate 8	F03	40905_0221	GGAGAAGACGTCGGCGACGAGGCTTCAGCTTCCCGATATCCGACGGTAGTGTNNNNNNNNGGAGGAGGAGGAGCTGAAGG	200 picomole Ultramer DNA Plate Oligo	Standard Desalting	Quantity Only	0.2
Plate 8	F04	40912_0222	GGAACTTGTTCTGGGACAGCAAAATCTGTCTTCAGCTTCCCGATATCCGACGGTAGTGTNNNNNNNNTTGAGGTCCCGTTGGG	200 picomole Ultramer DNA Plate Oligo	Standard Desalting	Quantity Only	0.2
Plate 8	F05	40919_0223	GGAATATAGTTCGAGACTGGGGAGCTTCAGCTTCCCGATATCCGACGGTAGTGTNNNNNNNNTGTTAGAGGTGAGAGG	200 picomole Ultramer DNA Plate Oligo	Standard Desalting	Quantity Only	0.2
Plate 8	F06	40924_0224	CATTATTCTTTGCATCATCCAGGGGCGCTTCAGCTTCCCGATATCCGACGGTAGTGTNNNNNNNNCTTTTTTTTGGGCGCGA	200 picomole Ultramer DNA Plate Oligo	Standard Desalting	Quantity Only	0.2
Plate 8	F07	40951_0225	ATCAATACCGAGAGGAAGCAAAACAGAGCTTCAGCTTCCCGATATCCGACGGTAGTGTNNNNNNNNGCAATAAAGCTTACAGA	200 picomole Ultramer DNA Plate Oligo	Standard Desalting	Quantity Only	0.2
Plate 8	F08	41013_0226	ATTTTATTGTGTCCATGAGTTGGTTAGGCTTCAGCTTCCCGATATCCGACGGTAGTGTNNNNNNNNAACACACTCTCTCTCTC	200 picomole Ultramer DNA Plate Oligo	Standard Desalting	Quantity Only	0.2
Plate 8	F09	41026_0227	GGATTATTGCTTGGATTGGCAATAGCACCTTCAGCTTCCCGATATCCGACGGTAGTGTNNNNNNNNTTTGTGGTCTTCCTCTC	200 picomole Ultramer DNA Plate Oligo	Standard Desalting	Quantity Only	0.2
Plate 8	F10	41039_0228	ACCCTAACTCCGATTTTTCTCACACCTCCCTTCAGCTTCCCGATATCCGACGGTAGTGTNNNNNNNNAAACTAAAGTGAAAAA	200 picomole Ultramer DNA Plate Oligo	Standard Desalting	Quantity Only	0.2
Plate 8	F11	41047_0229	CATCGAAACTTCGTCGCGTCTTTGCTCTTCAGCTTCCCGATATCCGACGGTAGTGTNNNNNNNNTTCTCTTTCTCTTTCTCTT	200 picomole Ultramer DNA Plate Oligo	Standard Desalting	Quantity Only	0.2
Plate 8	F12	41068_0230	GTCGAGGAACTCCGGTAAAGTATCTCCCTTCAGCTTCCCGATATCCGACGGTAGTGTNNNNNNNNAGTAAATAAAAGAAATAC	200 picomole Ultramer DNA Plate Oligo	Standard Desalting	Quantity Only	0.2
Plate 8	G01	41076_0231	GAACGTTGCTTTGATGTTCTTCGATACCTTCAGCTTCCCGATATCCGACGGTAGTGTNNNNNNNNAACCCTAACGATCAACAC	200 picomole Ultramer DNA Plate Oligo	Standard Desalting	Quantity Only	0.2
Plate 8	G02	41105_0232	GTTGCTTTTGTCTTTGCTTGAGCCTTCAGCTTCCCGATATCCGACGGTAGTGTNNNNNNNNGTCAAGCTTCGACGATTTAGCT	200 picomole Ultramer DNA Plate Oligo	Standard Desalting	Quantity Only	0.2
Plate 8	G03	41172_0233	CCAGATATTGAGCTTCCACATTCGACTTGCTTCAGCTTCCCGATATCCGACGGTAGTGTNNNNNNNNAACAAATAAAAAGAAA	200 picomole Ultramer DNA Plate Oligo	Standard Desalting	Quantity Only	0.2
Plate 8	G04	41183_0234	GGGATTCACGGAGGGCCGAGAAACTTCAGCTTCCCGATATCCGACGGTAGTGTNNNNNNNNGAGAGAACAGTTTCCAGTGG	200 picomole Ultramer DNA Plate Oligo	Standard Desalting	Quantity Only	0.2
Plate 8	G05	41222_0235	GCTAGTGGTTGCTGGTTGCAAAGCTCTTCAGCTTCCCGATATCCGACGGTAGTGTNNNNNNNNGACAGTGGAGACTCATA	200 picomole Ultramer DNA Plate Oligo	Standard Desalting	Quantity Only	0.2
Plate 8	G06	41230_0236	GATGAGGTTGTGGTAGTAAGGAGGAAGGCTTCAGCTTCCCGATATCCGACGGTAGTGTNNNNNNNNGGATCTGAGGGAGTTG	200 picomole Ultramer DNA Plate Oligo	Standard Desalting	Quantity Only	0.2
Plate 8	G07	41308_0237	TTGGTTAATGCCCCGACATCTGTTTCCCTTCAGCTTCCCGATATCCGACGGTAGTGTNNNNNNNNTTTGATGAACACGCGAG	200 picomole Ultramer DNA Plate Oligo	Standard Desalting	Quantity Only	0.2
Plate 8	G08	41320_0238	GTGTTGTTGATGATGAGTTCCCTTCAGCTTCCCGATATCCGACGGTAGTGTNNNNNNNNGGCAGTAGAAGTAGTGGGAGG	200 picomole Ultramer DNA Plate Oligo	Standard Desalting	Quantity Only	0.2
Plate 8	G09	41339_0239_SNP_a	ACTTACCCCAATTAGGTACTCTTCAGCTTCCCGATATCCGACGGTAGTGTNNNNNNNNGGGTTTTGTTAAGTGATTGAGGTTG	200 picomole Ultramer DNA Plate Oligo	Standard Desalting	Quantity Only	0.2
Plate 8	G10	41355_0240	CTTACCTTCTGTATCGATTCGTCAACCCTTCAGCTTCCCGATATCCGACGGTAGTGTNNNNNNNNCGTAGCATATACTTTGCG	200 picomole Ultramer DNA Plate Oligo	Standard Desalting	Quantity Only	0.2
Plate 8	G11	41426_0241_SNP_a	GGTGAGTATACGGATGCCCACTATTTTGGCTTCAGCTTCCCGATATCCGACGGTAGTGTNNNNNNNNCATATAAGAAACATGC	200 picomole Ultramer DNA Plate Oligo	Standard Desalting	Quantity Only	0.2
Plate 8	G12	41446_0242	GCTATTGTATTTCTAGGGTTTCGGATCCTCTTCAGCTTCCCGATATCCGACGGTAGTGTNNNNNNNNCCAAACCAACCAACAA	200 picomole Ultramer DNA Plate Oligo	Standard Desalting	Quantity Only	0.2
Plate 8	H01	41460_0243	GTCTTTCTTGGTGTTCTTTGTTTGGTCTTCAGCTTCCCGATATCCGACGGTAGTGTNNNNNNNNGTATGGTGCAAGAGAGG	200 picomole Ultramer DNA Plate Oligo	Standard Desalting	Quantity Only	0.2
Plate 8	H02	41464_0244_SNP_a	GGTTTGTTTCAGGGAAGAAGCTGATTCTGCTTCAGCTTCCCGATATCCGACGGTAGTGTNNNNNNNNGGATTAGCATCTAAAG	200 picomole Ultramer DNA Plate Oligo	Standard Desalting	Quantity Only	0.2
Plate 8	H03	41521_0245	GCCTGTTTGGATTTTTTTGCTGGACTGCTTCAGCTTCCCGATATCCGACGGTAGTGTNNNNNNNNCTGTTGTGAACTAGCGTC	200 picomole Ultramer DNA Plate Oligo	Standard Desalting	Quantity Only	0.2
Plate 8	H04	41598_0246	CAGATCACCTCTTCAACCTCAGAAACAACTTCAGCTTCCCGATATCCGACGGTAGTGTNNNNNNNNGTTTACTTTCGTTTGGA	200 picomole Ultramer DNA Plate Oligo	Standard Desalting	Quantity Only	0.2
Plate 8	H05	41653_0247	GTGGCAGCAGTTGGATCTAGCATGTTGCTTCAGCTTCCCGATATCCGACGGTAGTGTNNNNNNNNCGGAAATCAGAAGAAC	200 picomole Ultramer DNA Plate Oligo	Standard Desalting	Quantity Only	0.2
Plate 8	H06	41680_0248	GGGATATATGGCCGCTGCTCATTACCCTTCAGCTTCCCGATATCCGACGGTAGTGTNNNNNNNNGGGTGGTGGTAGATACTGG	200 picomole Ultramer DNA Plate Oligo	Standard Desalting	Quantity Only	0.2
Plate 8	H07	41695_0249	GCTGAACCGGAGCTCTGCAACAAGGACTTCAGCTTCCCGATATCCGACGGTAGTGTNNNNNNNNGACAATAGGAAGTAGAGAG	200 picomole Ultramer DNA Plate Oligo	Standard Desalting	Quantity Only	0.2
Plate 8	H08	41706_0250	GGTATTACAGCAACAATAAAGGAATCTACCTTCAGCTTCCCGATATCCGACGGTAGTGTNNNNNNNNGCTGACGGTGGGAGTT	200 picomole Ultramer DNA Plate Oligo	Standard Desalting	Quantity Only	0.2
Plate 8	H09	41720_0251	AACCGCTGTCCCGATACACGCTTCAGCTTCCCGATATCCGACGGTAGTGTNNNNNNNNACTTGAATCCGGAGGCAGAC	200 picomole Ultramer DNA Plate Oligo	Standard Desalting	Quantity Only	0.2
Plate 8	H10	41721_0252	GCTGTATTGGTCAACGATCAATAGCTTCAGCTTCCCGATATCCGACGGTAGTGTNNNNNNNNGGGCTTTTCGAGGGTTTCT	200 picomole Ultramer DNA Plate Oligo	Standard Desalting	Quantity Only	0.2
Plate 8	H11	41748_0253	GTCGGCGTTTAGACTACGCCACTTCAGCTTCCCGATATCCGACGGTAGTGTNNNNNNNNGGGTTATAGTTTTGCCGGTGAGGG	200 picomole Ultramer DNA Plate Oligo	Standard Desalting	Quantity Only	0.2
Plate 8	H12	41752_0254	CAGAGATTATCGAACACGAAGCAGAAGACCTTCAGCTTCCCGATATCCGACGGTAGTGTNNNNNNNNTAAATGACAACAAAGA	200 picomole Ultramer DNA Plate Oligo	Standard Desalting	Quantity Only	0.2
Plate 9	A01	41756_0255	GATGATGATGTTGATGTTGATGAAAACACTTCAGCTTCCCGATATCCGACGGTAGTGTNNNNNNNNGGGGGAAGGAAGTGGT	200 picomole Ultramer DNA Plate Oligo	Standard Desalting	Quantity Only	0.2
Plate 9	A02	41898_0256	CTCTCTTCATCAAGCTCTGCTTCTGGCTTCAGCTTCCCGATATCCGACGGTAGTGTNNNNNNNNCTGTTATATAATAAAGGAG	200 picomole Ultramer DNA Plate Oligo	Standard Desalting	Quantity Only	0.2
Plate 9	A03	41904_0257	ATTTTTGTGTCCCAATCTCTTCTTCATTTCTTCAGCTTCCCGATATCCGACGGTAGTGTNNNNNNNNTTTTATTTGTTTGTCC	200 picomole Ultramer DNA Plate Oligo	Standard Desalting	Quantity Only	0.2
Plate 9	A04	41915_0258	GCTGAAGGCCTAAAAAGTACTCCATTGTTCTTCAGCTTCCCGATATCCGACGGTAGTGTNNNNNNNNTTGTTTTGGTGTTTTC	200 picomole Ultramer DNA Plate Oligo	Standard Desalting	Quantity Only	0.2
Plate 9	A05	41916_0259	GCGTAAACTACAGCGGTTCTGCACGGTGCTTCAGCTTCCCGATATCCGACGGTAGTGTNNNNNNNNAGGAGAAGAAGATCAA	200 picomole Ultramer DNA Plate Oligo	Standard Desalting	Quantity Only	0.2
Plate 9	A06	41937_0260	GTGTTTTCGGTGAAGAAGCTTAAGTGGCTTCAGCTTCCCGATATCCGACGGTAGTGTNNNNNNNNTGGCTCACGACGAAAG	200 picomole Ultramer DNA Plate Oligo	Standard Desalting	Quantity Only	0.2
Plate 9	A07	41951_0261	GATCTCTCTAAAGTGTTTCAGTGCTTCACTTCAGCTTCCCGATATCCGACGGTAGTGTNNNNNNNNTGTGTGTGTGTGAGTG	200 picomole Ultramer DNA Plate Oligo	Standard Desalting	Quantity Only	0.2
Plate 9	A08	42022_0262	CCCGCCAATTTCTTCCTCCTTCAGCTTCCCGATATCCGACGGTAGTGTNNNNNNNNCTTCCAAGTTTTTTATTCTTTTTCATG	200 picomole Ultramer DNA Plate Oligo	Standard Desalting	Quantity Only	0.2
Plate 9	A09	42044_0091	GCTTTGTGGGCTAGTTTTCTAGACGCTTCAGCTTCCCGATATCCGACGGTAGTGTNNNNNNNNCAAGCAAGTTAGGAGT	200 picomole Ultramer DNA Plate Oligo	Standard Desalting	Quantity Only	0.2
Plate 9	A10	42056_0092	CGTAAAAATGGTGCATGCAGAGTCAAACTTCAGCTTCCCGATATCCGACGGTAGTGTNNNNNNNNCCGGTTTTTGGTCTGT	200 picomole Ultramer DNA Plate Oligo	Standard Desalting	Quantity Only	0.2
Plate 9	A11	42071_0093	GCGGTCTCATTAGTCCCTCCTTCAGCTTCCCGATATCCGACGGTAGTGTNNNNNNNNTTCTTGGTGGATGCCTTAGCGGCG	200 picomole Ultramer DNA Plate Oligo	Standard Desalting	Quantity Only	0.2
Plate 9	A12	42136_0263	GCTAATCATATCGGATTTGGTTTGATTGTCTTCAGCTTCCCGATATCCGACGGTAGTGTNNNNNNNNGTGTTGATAATCCGGG	200 picomole Ultramer DNA Plate Oligo	Standard Desalting	Quantity Only	0.2
Plate 9	B01	42180_0264	GAGAGTTTTGATGCTCCTCCGGTGCCCTTCAGCTTCCCGATATCCGACGGTAGTGTNNNNNNNNGATGGGGCAGATGCAGAGT	200 picomole Ultramer DNA Plate Oligo	Standard Desalting	Quantity Only	0.2
Plate 9	B02	42252_0265	GCGATCTATGCCTGAAGTGGAAGTGGATCTTCAGCTTCCCGATATCCGACGGTAGTGTNNNNNNNNTAGCGCGTCGTACACTT	200 picomole Ultramer DNA Plate Oligo	Standard Desalting	Quantity Only	0.2
Plate 9	B03	42257_0266_SNP_a	GTGTGAAGAGAGTGGAAAAGTCGTCACCTTCAGCTTCCCGATATCCGACGGTAGTGTNNNNNNNNGAGAAGAAGATTGAAAGA	200 picomole Ultramer DNA Plate Oligo	Standard Desalting	Quantity Only	0.2
Plate 9	B04	42272_0267	GCGGACTGATCTAAATCTTTTATGTTTGCCTTCAGCTTCCCGATATCCGACGGTAGTGTNNNNNNNNAAAACCAAAACGAGTG	200 picomole Ultramer DNA Plate Oligo	Standard Desalting	Quantity Only	0.2
Plate 9	B05	42326_0268	CGGTTTATTTCGATTTTCCCGGGAGATTTCTTCAGCTTCCCGATATCCGACGGTAGTGTNNNNNNNNGTCTTGGATCTGTTTG	200 picomole Ultramer DNA Plate Oligo	Standard Desalting	Quantity Only	0.2
Plate 9	B06	42339_0269	GCCATGGTTGATTGAAGTGAGCTTGCTTCAGCTTCCCGATATCCGACGGTAGTGTNNNNNNNNCGATTTGATCTGAGTTTGCG	200 picomole Ultramer DNA Plate Oligo	Standard Desalting	Quantity Only	0.2
Plate 9	B07	42356_0270	GGAGATCAAAAGAGAGCTGCTTTTTCCAGCTTCAGCTTCCCGATATCCGACGGTAGTGTNNNNNNNNTCGATAATGGTGGAGC	200 picomole Ultramer DNA Plate Oligo	Standard Desalting	Quantity Only	0.2
Plate 9	B08	42382_0271	GGGTCAACAAAGCTTTGGATTTTGTCCATCTTCAGCTTCCCGATATCCGACGGTAGTGTNNNNNNNNGAGGAAAATAGGGGAG	200 picomole Ultramer DNA Plate Oligo	Standard Desalting	Quantity Only	0.2
Plate 9	B09	42385_0272	ATTTGGGCTTTAAAATAAGCCCAATTGACTTCAGCTTCCCGATATCCGACGGTAGTGTNNNNNNNNGAGCTTTGTGAAATTCG	200 picomole Ultramer DNA Plate Oligo	Standard Desalting	Quantity Only	0.2
Plate 9	B10	42508_0094	GAAAGATAGATGAAGCATTATTCATGCTACTTCAGCTTCCCGATATCCGACGGTAGTGTNNNNNNNNGTCCATGAAAGTGAGG	200 picomole Ultramer DNA Plate Oligo	Standard Desalting	Quantity Only	0.2
Plate 9	B11	42583_0273	GCAAGTGAACTCGGTGAGGACATGATTGACTTCAGCTTCCCGATATCCGACGGTAGTGTNNNNNNNNCAAGAGGACTAAAGGA	200 picomole Ultramer DNA Plate Oligo	Standard Desalting	Quantity Only	0.2
Plate 9	B12	42619_0274	GGCCCAAGAGATGCCTAGGAGGCCGACACTTCAGCTTCCCGATATCCGACGGTAGTGTNNNNNNNNGAATGATGAAGCATGTG	200 picomole Ultramer DNA Plate Oligo	Standard Desalting	Quantity Only	0.2
Plate 9	C01	42622_0275	TTCGATAACTCTCAGCAACACAGCATCCTTCAGCTTCCCGATATCCGACGGTAGTGTNNNNNNNNCAACAAAAGGGTTCTTTT	200 picomole Ultramer DNA Plate Oligo	Standard Desalting	Quantity Only	0.2
Plate 9	C02	42711_0095	GATGGAAGTTGGTACTTTGCAATCTCTTCAGCTTCCCGATATCCGACGGTAGTGTNNNNNNNNTTTCCGGGGCCGGAGAGTT	200 picomole Ultramer DNA Plate Oligo	Standard Desalting	Quantity Only	0.2
Plate 9	C03	42712_0276	GTCTTACCATATACGGAAAGGCCAGCTTCAGCTTCCCGATATCCGACGGTAGTGTNNNNNNNNTCTGTGTGTGACCCTTTTTG	200 picomole Ultramer DNA Plate Oligo	Standard Desalting	Quantity Only	0.2
Plate 9	C04	42729_0277	GCAGCTAATGATGATGATTCCATGGAGCCTTCAGCTTCCCGATATCCGACGGTAGTGTNNNNNNNNAAACTAAACAATAAACA	200 picomole Ultramer DNA Plate Oligo	Standard Desalting	Quantity Only	0.2
Plate 9	C05	42819_0279	GCTGTATGGCTTTTCCTGATGAGATTGCTCTTCAGCTTCCCGATATCCGACGGTAGTGTNNNNNNNNGGGGAACATATTAAAG	200 picomole Ultramer DNA Plate Oligo	Standard Desalting	Quantity Only	0.2
Plate 9	C06	42850_0280	GGGAGGGTTTTTAAGGAGTGGAGTGGGGCTTCAGCTTCCCGATATCCGACGGTAGTGTNNNNNNNNGTTTGCGTTCTGGTTAG	200 picomole Ultramer DNA Plate Oligo	Standard Desalting	Quantity Only	0.2
Plate 9	C07	42857_0096	GTTTTCGGAAATAGCCATGGATGCTTCAGCTTCCCGATATCCGACGGTAGTGTNNNNNNNNCTTGGGATTTGGGATTTC	200 picomole Ultramer DNA Plate Oligo	Standard Desalting	Quantity Only	0.2
Plate 9	C08	42965_0281	GCTGGTTCGGTTCGTGTTCTTCAGCTTCCCGATATCCGACGGTAGTGTNNNNNNNNCTCTGATCTCTTATCTCTAATTCTAAT	200 picomole Ultramer DNA Plate Oligo	Standard Desalting	Quantity Only	0.2
Plate 9	C09	43048_0282	GGATTCTTTTTGGACTCTTGAGTCTCAGCTTCAGCTTCCCGATATCCGACGGTAGTGTNNNNNNNNTCCAATACACCACCAA	200 picomole Ultramer DNA Plate Oligo	Standard Desalting	Quantity Only	0.2
Plate 9	C10	43055_0283	GAGGAGGGCTACGAGAGAGAGAGAGACTTCAGCTTCCCGATATCCGACGGTAGTGTNNNNNNNNGGACGATTCTAACTCGGAG	200 picomole Ultramer DNA Plate Oligo	Standard Desalting	Quantity Only	0.2
Plate 9	C11	43058_0284	CGATTCCGACAGATAGACAGAGGGCGCTTCAGCTTCCCGATATCCGACGGTAGTGTNNNNNNNNGGATAGACGAAAACAAGGG	200 picomole Ultramer DNA Plate Oligo	Standard Desalting	Quantity Only	0.2
Plate 9	C12	43108_0285	CATAGGGGTCGATTGTGTTCTTGCCTTCTTCAGCTTCCCGATATCCGACGGTAGTGTNNNNNNNNTTACGATGGTCTCTCTT	200 picomole Ultramer DNA Plate Oligo	Standard Desalting	Quantity Only	0.2
Plate 9	D01	43114_0286	GTTTGATTTGTTTGGACCATTATTGGCCTTCAGCTTCCCGATATCCGACGGTAGTGTNNNNNNNNGTGTTTGTGTGTGGTTG	200 picomole Ultramer DNA Plate Oligo	Standard Desalting	Quantity Only	0.2
Plate 9	D02	43118_0287	GCAAGAGTTGTGCTGAACCAGCCACGGCTTCAGCTTCCCGATATCCGACGGTAGTGTNNNNNNNNGAAGGAAGAGAAAGGA	200 picomole Ultramer DNA Plate Oligo	Standard Desalting	Quantity Only	0.2
Plate 9	D03	43135_0288	GGTTGGGCCACGATGGGCCTTCTCTTCAGCTTCCCGATATCCGACGGTAGTGTNNNNNNNNAACCAAAAGAGCAAAGGGG	200 picomole Ultramer DNA Plate Oligo	Standard Desalting	Quantity Only	0.2
Plate 9	D04	43144_0289	GAGGATAGAGATTTTGCGACGAGGAGGCTTCAGCTTCCCGATATCCGACGGTAGTGTNNNNNNNNAACAAACCTTAATTAGCA	200 picomole Ultramer DNA Plate Oligo	Standard Desalting	Quantity Only	0.2
Plate 9	D05	43147_0290	TCTCAAATCAAACCGAAATTACTTTGATCTTCAGCTTCCCGATATCCGACGGTAGTGTNNNNNNNNGGGATTTGTCGTGATAC	200 picomole Ultramer DNA Plate Oligo	Standard Desalting	Quantity Only	0.2
Plate 9	D06	43174_0291	ACCATGGTTGTGAAAACAGAGGATCATCCTTCAGCTTCCCGATATCCGACGGTAGTGTNNNNNNNNGATGGGTGATGCAGCG	200 picomole Ultramer DNA Plate Oligo	Standard Desalting	Quantity Only	0.2
Plate 9	D07	43175_0292	GTAGTCACGCTTTGTGTATGTGTCTGCTTCAGCTTCCCGATATCCGACGGTAGTGTNNNNNNNNAAAGCAAGAAACGAGG	200 picomole Ultramer DNA Plate Oligo	Standard Desalting	Quantity Only	0.2
Plate 9	D08	43371_0293	GGAAAAAATATACACTACATGACAAAAAGCTTCAGCTTCCCGATATCCGACGGTAGTGTNNNNNNNNGGGTTTAGGAATTGTG	200 picomole Ultramer DNA Plate Oligo	Standard Desalting	Quantity Only	0.2
Plate 9	D09	43377_0294	GTTTGGTCTGTTTTTGGGGCTTCAGCTTCCCGATATCCGACGGTAGTGTNNNNNNNNTGGAGGATTCGGGGAGGTTAG	200 picomole Ultramer DNA Plate Oligo	Standard Desalting	Quantity Only	0.2
Plate 9	D10	43453_0295	GGTGGGAGTGTCTGGTTCAACCTTCAGCTTCCCGATATCCGACGGTAGTGTNNNNNNNNGGTGACGCTGAGGTTGAAA	200 picomole Ultramer DNA Plate Oligo	Standard Desalting	Quantity Only	0.2
Plate 9	D11	43469_0097	GACGTAGTTGTAAAACTAGTCAGGGGTTCTTCAGCTTCCCGATATCCGACGGTAGTGTNNNNNNNNCAGATCCAAAACCCAAA	200 picomole Ultramer DNA Plate Oligo	Standard Desalting	Quantity Only	0.2
Plate 9	D12	43472_0296	GCATCAGTATCTGAACCCGCCTTGGGTCTTCAGCTTCCCGATATCCGACGGTAGTGTNNNNNNNNTGCTCTCTCTCTTCTGTC	200 picomole Ultramer DNA Plate Oligo	Standard Desalting	Quantity Only	0.2
Plate 9	E01	43494_0297	GTCAGCTTAGACACCACTTCTTCCAGACCTTCAGCTTCCCGATATCCGACGGTAGTGTNNNNNNNNGTTTCTTCATCTTCTTC	200 picomole Ultramer DNA Plate Oligo	Standard Desalting	Quantity Only	0.2
Plate 9	E02	43528_0298	GAATCTTGAGGGGATGGAATTTGACTCCTTCAGCTTCCCGATATCCGACGGTAGTGTNNNNNNNNGATGGACTGGGTGAAG	200 picomole Ultramer DNA Plate Oligo	Standard Desalting	Quantity Only	0.2
Plate 9	E03	43532_0299	GCTTCTAGAAGTGGAGAGAAGGGGGAACTTCAGCTTCCCGATATCCGACGGTAGTGTNNNNNNNNATACGATCACGGAGAA	200 picomole Ultramer DNA Plate Oligo	Standard Desalting	Quantity Only	0.2
Plate 9	E04	43538_0300	CCTGTTTCCTGATCTGTTTTCCGGATCGCTTCAGCTTCCCGATATCCGACGGTAGTGTNNNNNNNNCACTGCACACAAAGCGA	200 picomole Ultramer DNA Plate Oligo	Standard Desalting	Quantity Only	0.2
Plate 9	E05	43566_0301	GCCGGAGATGGGAGGTGGGAGAGAGCTTCAGCTTCCCGATATCCGACGGTAGTGTNNNNNNNNGGACGGCTGAGAGCGG	200 picomole Ultramer DNA Plate Oligo	Standard Desalting	Quantity Only	0.2
Plate 9	E06	43582_0302	GTCTTGGGATTTGTTGAAATGGAGACGCTTCAGCTTCCCGATATCCGACGGTAGTGTNNNNNNNNTTTTCGGTTCAGATTTCT	200 picomole Ultramer DNA Plate Oligo	Standard Desalting	Quantity Only	0.2
Plate 9	E07	43587_0303	TTCCGGCGCCGGCGGCGGCCTTCAGCTTCCCGATATCCGACGGTAGTGTNNNNNNNNGGTGAAGAAAGATGATGGAGT	200 picomole Ultramer DNA Plate Oligo	Standard Desalting	Quantity Only	0.2
Plate 9	E08	43602_0304_SNP_a	GTCGGTTGAATTTAAGGTTTTGGGCGGCTTCAGCTTCCCGATATCCGACGGTAGTGTNNNNNNNNGGGTCTTCTCGAACTTTG	200 picomole Ultramer DNA Plate Oligo	Standard Desalting	Quantity Only	0.2
Plate 9	E09	43618_0305	CGTGGCGTCGGGAGTGGCTAGAGTTTCTTCAGCTTCCCGATATCCGACGGTAGTGTNNNNNNNNTCTTTTCCTTGACCTCAT	200 picomole Ultramer DNA Plate Oligo	Standard Desalting	Quantity Only	0.2
Plate 9	E10	43670_0306	CTTTCTGGGATATATCGGACGGTCGATCTTCAGCTTCCCGATATCCGACGGTAGTGTNNNNNNNNCGCTACCGAAAAACCA	200 picomole Ultramer DNA Plate Oligo	Standard Desalting	Quantity Only	0.2
Plate 9	E11	43791_0307_SNP_a	GTGAAGAAGCGTTTGGTCTGGTCGACTTCAGCTTCCCGATATCCGACGGTAGTGTNNNNNNNNGCAGAAGGGTATTGTAG	200 picomole Ultramer DNA Plate Oligo	Standard Desalting	Quantity Only	0.2
Plate 9	E12	43826_0308	TCGTCTCTACCTCTGAGGCTACTTCTTCCCTTCAGCTTCCCGATATCCGACGGTAGTGTNNNNNNNNACCAAATACACATCCG	200 picomole Ultramer DNA Plate Oligo	Standard Desalting	Quantity Only	0.2
Plate 9	F01	43830_0309	GTGGTTTTGGTTATGGCTGTGGTTGTTGCTTCAGCTTCCCGATATCCGACGGTAGTGTNNNNNNNNGAGAATCCTCTGGTCC	200 picomole Ultramer DNA Plate Oligo	Standard Desalting	Quantity Only	0.2
Plate 9	F02	43880_0310	CTGCAAATCGCATTTGGTGAGATGAGATCCTTCAGCTTCCCGATATCCGACGGTAGTGTNNNNNNNNACAAGTCGAAGGTTTC	200 picomole Ultramer DNA Plate Oligo	Standard Desalting	Quantity Only	0.2
Plate 9	F03	43894_0311_SNP_a	GCTTTTGATGTTGATAGTTTTGTTGACCTTCAGCTTCCCGATATCCGACGGTAGTGTNNNNNNNNAATGGAGGAGACAATGG	200 picomole Ultramer DNA Plate Oligo	Standard Desalting	Quantity Only	0.2
Plate 9	F04	43898_0312	CTTCGTGTAGCTGAGCTCCGTCCTTCAGCTTCCCGATATCCGACGGTAGTGTNNNNNNNNTCCTCGCTTCCGCTAATGATTGT	200 picomole Ultramer DNA Plate Oligo	Standard Desalting	Quantity Only	0.2
Plate 9	F05	43900_0313	GCGTGGCTGGTAATGGAAGACCTTTGAACTTCAGCTTCCCGATATCCGACGGTAGTGTNNNNNNNNGAATGTAATGTGTGGT	200 picomole Ultramer DNA Plate Oligo	Standard Desalting	Quantity Only	0.2
Plate 9	F06	43954_0314	GCAGATGGAGTTCCAATGGGTATAAGTCCCTTCAGCTTCCCGATATCCGACGGTAGTGTNNNNNNNNATCAACCCACCAAATC	200 picomole Ultramer DNA Plate Oligo	Standard Desalting	Quantity Only	0.2
Plate 9	F07	43969_0315	GGTTTGTGTTTGTCTCTATGTGTGTGTCCTTCAGCTTCCCGATATCCGACGGTAGTGTNNNNNNNNCGGGACCATATTTAGA	200 picomole Ultramer DNA Plate Oligo	Standard Desalting	Quantity Only	0.2
Plate 9	F08	43970_0316	GATTCGTTTAGTCGTTAACGACGAGTCTACTTCAGCTTCCCGATATCCGACGGTAGTGTNNNNNNNNTGTAAACTTTGTCAAG	200 picomole Ultramer DNA Plate Oligo	Standard Desalting	Quantity Only	0.2
Plate 9	F09	44023_0317	CTATGTAACGCTTGTGGAGTCCGGTTCTTCAGCTTCCCGATATCCGACGGTAGTGTNNNNNNNNAAAGAAAGAACAATCCGGC	200 picomole Ultramer DNA Plate Oligo	Standard Desalting	Quantity Only	0.2
Plate 9	F10	44039_0318	GTAGGAGGAGCTTGTGGGTACGCTTCAGCTTCCCGATATCCGACGGTAGTGTNNNNNNNNCGGAGTTACTTGGTACGG	200 picomole Ultramer DNA Plate Oligo	Standard Desalting	Quantity Only	0.2
Plate 9	F11	44040_0319	CCGTTTGTAGTTGACACGTATAACACCAGCTTCAGCTTCCCGATATCCGACGGTAGTGTNNNNNNNNCAATATCCAACACAAT	200 picomole Ultramer DNA Plate Oligo	Standard Desalting	Quantity Only	0.2
Plate 9	F12	44046_0320	GGGGAGGGGGTGTTTGGTTCTTCAGCTTCCCGATATCCGACGGTAGTGTNNNNNNNNGAGACATAACCTCTCTCTCTC	200 picomole Ultramer DNA Plate Oligo	Standard Desalting	Quantity Only	0.2
Plate 9	G01	44048_0321	CACGTGAGAACTACGAATGGGAATTTCGCCTTCAGCTTCCCGATATCCGACGGTAGTGTNNNNNNNNTTGTCGGTTCTAGCCC	200 picomole Ultramer DNA Plate Oligo	Standard Desalting	Quantity Only	0.2
Plate 9	G02	44076_0323	GTCGAGTCTTGAAATTTGATTGGTGAGACTTCAGCTTCCCGATATCCGACGGTAGTGTNNNNNNNNAGAACATGGGGATTGA	200 picomole Ultramer DNA Plate Oligo	Standard Desalting	Quantity Only	0.2
Plate 9	G03	44082_0324	GGGAGGTTCTGGTTTCGTTGCTTCAGCTTCCCGATATCCGACGGTAGTGTNNNNNNNNCACCAGAAGAGAGAGAAAGA	200 picomole Ultramer DNA Plate Oligo	Standard Desalting	Quantity Only	0.2
Plate 9	G04	44117_0325	GTTGTCTGCAATGGAGATTCTAGTCGGGCTTCAGCTTCCCGATATCCGACGGTAGTGTNNNNNNNNGTGGAAATCGGAGAGGG	200 picomole Ultramer DNA Plate Oligo	Standard Desalting	Quantity Only	0.2
Plate 9	G05	44124_0326	TGAGGAGGTGGCTTTTGCGTTTCCGCTTCAGCTTCCCGATATCCGACGGTAGTGTNNNNNNNNTAGAGAGAGAGAGAGTGAC	200 picomole Ultramer DNA Plate Oligo	Standard Desalting	Quantity Only	0.2
Plate 9	G06	44128_0327	TATAGCCAACACTTGTCGGGACCCGTGACTTCAGCTTCCCGATATCCGACGGTAGTGTNNNNNNNNCCAAAAATAAAATGGAG	200 picomole Ultramer DNA Plate Oligo	Standard Desalting	Quantity Only	0.2
Plate 9	G07	44135_0328	GAGGGATGGGTAGGAATCATGATCAAGCTTCAGCTTCCCGATATCCGACGGTAGTGTNNNNNNNNATGAACAGAGGGGAGG	200 picomole Ultramer DNA Plate Oligo	Standard Desalting	Quantity Only	0.2
Plate 9	G08	44199_0329	GTTTAGAGTTTTGTTTTGTCCCTGGCTTCAGCTTCCCGATATCCGACGGTAGTGTNNNNNNNNTGTCGAATTTGAGCGGTTTG	200 picomole Ultramer DNA Plate Oligo	Standard Desalting	Quantity Only	0.2
Plate 9	G09	44208_0330	GATATGGAGGACTTACACTATGCTTGCTTCAGCTTCCCGATATCCGACGGTAGTGTNNNNNNNNGGAAGAACAAAATAGTGGC	200 picomole Ultramer DNA Plate Oligo	Standard Desalting	Quantity Only	0.2
Plate 9	G10	44218_0331	GGGGGATGCAACGGTATAAACTCAGATCCTTCAGCTTCCCGATATCCGACGGTAGTGTNNNNNNNNGAGGCAAAGGAAAAAA	200 picomole Ultramer DNA Plate Oligo	Standard Desalting	Quantity Only	0.2
Plate 9	G11	44219_0332	GTGGCTAATGTTTGTCTGTTAAACTTCTTCAGCTTCCCGATATCCGACGGTAGTGTNNNNNNNNCTTCTCCTTCTTCTTCCT	200 picomole Ultramer DNA Plate Oligo	Standard Desalting	Quantity Only	0.2
Plate 9	G12	44222_0333	GCTGAGGCATTTGCATAGAGCCCGGACTTCAGCTTCCCGATATCCGACGGTAGTGTNNNNNNNNGCTTGCTGCTGTGCTTTTT	200 picomole Ultramer DNA Plate Oligo	Standard Desalting	Quantity Only	0.2
Plate 9	H01	44224_0334	TTTCATCATATCCATCTCTCGACGCTTCAGCTTCCCGATATCCGACGGTAGTGTNNNNNNNNTCCACCTTGTAATCACTCATC	200 picomole Ultramer DNA Plate Oligo	Standard Desalting	Quantity Only	0.2
Plate 9	H02	44225_0335	GCGTCGCCGAGCAAACGTCGAGAGATGGCTTCAGCTTCCCGATATCCGACGGTAGTGTNNNNNNNNAATGAAAGTAAGGCAAA	200 picomole Ultramer DNA Plate Oligo	Standard Desalting	Quantity Only	0.2
Plate 9	H03	44238_0336	GCCATTGGAGACCTCGAATACCTAAAGCCTTCAGCTTCCCGATATCCGACGGTAGTGTNNNNNNNNGAAGCTTGTTGATCTCT	200 picomole Ultramer DNA Plate Oligo	Standard Desalting	Quantity Only	0.2
Plate 9	H04	44240_0337	CAAGATTAATTATAACATTTCTGCTGTGCCTTCAGCTTCCCGATATCCGACGGTAGTGTNNNNNNNNATACCACGTACTTTCG	200 picomole Ultramer DNA Plate Oligo	Standard Desalting	Quantity Only	0.2
Plate 9	H05	44242_0338	TATGGGTCACGCCGTTCGTAGTATCAGCTTCAGCTTCCCGATATCCGACGGTAGTGTNNNNNNNNGGTTTCGGCGATTGACG	200 picomole Ultramer DNA Plate Oligo	Standard Desalting	Quantity Only	0.2
Plate 9	H06	44267_0339	TCACTAATCCCGAAACGTATCATTAGCCTTCAGCTTCCCGATATCCGACGGTAGTGTNNNNNNNNCTACAGCCTCCATACCT	200 picomole Ultramer DNA Plate Oligo	Standard Desalting	Quantity Only	0.2
Plate 9	H07	44268_0340	CTCTTTTGTATTCTGTGTATAGTCGAAGCTTCAGCTTCCCGATATCCGACGGTAGTGTNNNNNNNNAGAGAGATCACAATCAG	200 picomole Ultramer DNA Plate Oligo	Standard Desalting	Quantity Only	0.2
Plate 9	H08	44309_0341	GGAGGTGATTGTTGGTGCTAATCATATGCTTCAGCTTCCCGATATCCGACGGTAGTGTNNNNNNNNGTTGAGAAGTGGAGTG	200 picomole Ultramer DNA Plate Oligo	Standard Desalting	Quantity Only	0.2
Plate 9	H09	44327_0342	GTACTACAGGAGGAGGATCTTCATGGCTTCAGCTTCCCGATATCCGACGGTAGTGTNNNNNNNNGTTTTGTTTCCATTTGGGG	200 picomole Ultramer DNA Plate Oligo	Standard Desalting	Quantity Only	0.2
Plate 9	H10	44414_0343	GCTACGGAAATGGAGAAATCTCAGCCACTCTTCAGCTTCCCGATATCCGACGGTAGTGTNNNNNNNNTCAATGAAAGAAACAA	200 picomole Ultramer DNA Plate Oligo	Standard Desalting	Quantity Only	0.2
Plate 9	H11	44468_0100	CGGTGCATACGTGAAGACAAAGTATATACTTCAGCTTCCCGATATCCGACGGTAGTGTNNNNNNNNGTTCCGAGGGGCGAGGG	200 picomole Ultramer DNA Plate Oligo	Standard Desalting	Quantity Only	0.2
Plate 9	H12	44476_0344	GGAGTTGTTCTTGTACTAGCCTTCTCTTCAGCTTCCCGATATCCGACGGTAGTGTNNNNNNNNGAGACATGTTGGAGAAGAAG	200 picomole Ultramer DNA Plate Oligo	Standard Desalting	Quantity Only	0.2
Plate 10	A01	44488_0345	GAGACTGAAAGAGAGAAATTAAGCAACTTCAGCTTCCCGATATCCGACGGTAGTGTNNNNNNNNGGCCTGCGTGCTGTGCTGG	200 picomole Ultramer DNA Plate Oligo	Standard Desalting	Quantity Only	0.2
Plate 10	A02	44546_0346_SNP_a	CTCTGTAAAACCAGTGTCGTTGTTGGTGCTTCAGCTTCCCGATATCCGACGGTAGTGTNNNNNNNNCAAACAACAATGGTGCG	200 picomole Ultramer DNA Plate Oligo	Standard Desalting	Quantity Only	0.2
Plate 10	A03	44556_0347	AGAGAGTTAACGGGACTCACTGGATTCTTCAGCTTCCCGATATCCGACGGTAGTGTNNNNNNNNGGTAAGGATTCAGGGG	200 picomole Ultramer DNA Plate Oligo	Standard Desalting	Quantity Only	0.2
Plate 10	A04	44583_0348	CTTTCTCTGACCTTGTTCCCATCCTCGACCTTCAGCTTCCCGATATCCGACGGTAGTGTNNNNNNNNTCTTCTTCACTCTCTT	200 picomole Ultramer DNA Plate Oligo	Standard Desalting	Quantity Only	0.2
Plate 10	A05	44597_0349	AGCGACACTGATTCATATATTGCCACGTGCTTCAGCTTCCCGATATCCGACGGTAGTGTNNNNNNNNTGTTGTGTGCTTGACA	200 picomole Ultramer DNA Plate Oligo	Standard Desalting	Quantity Only	0.2
Plate 10	A06	44604_0350	GGAACAAGGGAAGACGAGCTTGAACTTCAGCTTCCCGATATCCGACGGTAGTGTNNNNNNNNTTGTGGCGGTGGACATGGG	200 picomole Ultramer DNA Plate Oligo	Standard Desalting	Quantity Only	0.2
Plate 10	A07	44606_0351	GCTTGAGAGGATCACCTCGAAAGCTGCTGCTTCAGCTTCCCGATATCCGACGGTAGTGTNNNNNNNNAATATGGCTAAACCCA	200 picomole Ultramer DNA Plate Oligo	Standard Desalting	Quantity Only	0.2
Plate 10	A08	44631_0352	CCTCGTCGGATTCAGGATTTGAAATCTGCTTCAGCTTCCCGATATCCGACGGTAGTGTNNNNNNNNTGGTGATGATCAGGGTG	200 picomole Ultramer DNA Plate Oligo	Standard Desalting	Quantity Only	0.2
Plate 10	A09	44636_0353	GTGGGCTGAGATCATGTACTCATACAAGCTTCAGCTTCCCGATATCCGACGGTAGTGTNNNNNNNNAGAAAAGTACAGAACA	200 picomole Ultramer DNA Plate Oligo	Standard Desalting	Quantity Only	0.2
Plate 10	A10	44650_0354	GGTTGAGGAGGAATCTATTTCGGTAGCCTTCAGCTTCCCGATATCCGACGGTAGTGTNNNNNNNNAATCAGAATCAGACAGCA	200 picomole Ultramer DNA Plate Oligo	Standard Desalting	Quantity Only	0.2
Plate 10	A11	44660_0355	GTCTGCAGCTTTGGTAAAGAGGATGATGACTTCAGCTTCCCGATATCCGACGGTAGTGTNNNNNNNNATCGGGACGACGAGAT	200 picomole Ultramer DNA Plate Oligo	Standard Desalting	Quantity Only	0.2
Plate 10	A12	44672_0356	ACTAGAAAAACAAGGAGGAAGTCTTTCCCCTTCAGCTTCCCGATATCCGACGGTAGTGTNNNNNNNNATGGAATGATAGGGAC	200 picomole Ultramer DNA Plate Oligo	Standard Desalting	Quantity Only	0.2
Plate 10	B01	44673_0357	GGTGTCCGGTGGGATAATCCTCCTTCAGCTTCCCGATATCCGACGGTAGTGTNNNNNNNNGGCCTTTTACAGTCATGCGTGTG	200 picomole Ultramer DNA Plate Oligo	Standard Desalting	Quantity Only	0.2
Plate 10	B02	44726_0358	GGACATTGTTCTGGGATATGACAGCGTCCTTCAGCTTCCCGATATCCGACGGTAGTGTNNNNNNNNTTTACAAACCGGGGTGC	200 picomole Ultramer DNA Plate Oligo	Standard Desalting	Quantity Only	0.2
Plate 10	B03	44771_0359	GCTGCTAAAAGAGAGTGAGCTGACACCTTCAGCTTCCCGATATCCGACGGTAGTGTNNNNNNNNTTGGGACAATGGCAATGG	200 picomole Ultramer DNA Plate Oligo	Standard Desalting	Quantity Only	0.2
Plate 10	B04	44789_0360	GGGTTTTTGTTGTTGTTCTCTCCATGCAGCTTCAGCTTCCCGATATCCGACGGTAGTGTNNNNNNNNAGATCAGATCACATCT	200 picomole Ultramer DNA Plate Oligo	Standard Desalting	Quantity Only	0.2
Plate 10	B05	44804_0361	GGGCTTGTGCGTACTATTTGTAGCTGCTTCAGCTTCCCGATATCCGACGGTAGTGTNNNNNNNNACAAGGATAAAGAGAG	200 picomole Ultramer DNA Plate Oligo	Standard Desalting	Quantity Only	0.2
Plate 10	B06	44807_0362_SNP_a	GCGTTGTTGAGCTTGTTCACTAGGCTAAGCTTCAGCTTCCCGATATCCGACGGTAGTGTNNNNNNNNACGAAATGGAAGAGGA	200 picomole Ultramer DNA Plate Oligo	Standard Desalting	Quantity Only	0.2
Plate 10	B07	44826_0363	CGAGCTCTATCTAGTCGTAACGCGATTGGCTTCAGCTTCCCGATATCCGACGGTAGTGTNNNNNNNNTTCGAGGTCGAGGGTT	200 picomole Ultramer DNA Plate Oligo	Standard Desalting	Quantity Only	0.2
Plate 10	B08	44831_0364	CCCGCAAGACCAAAATAACGAGCCTTGTCTTCAGCTTCCCGATATCCGACGGTAGTGTNNNNNNNNGTAAGAGCAGATACAAG	200 picomole Ultramer DNA Plate Oligo	Standard Desalting	Quantity Only	0.2
Plate 10	B09	44841_0365	CGAGGTGGTTCCTGCGAGTATTCCGAACTTCAGCTTCCCGATATCCGACGGTAGTGTNNNNNNNNGGGGAGGCTCGGCGTTG	200 picomole Ultramer DNA Plate Oligo	Standard Desalting	Quantity Only	0.2
Plate 10	B10	44858_0366	GACCAGGTTGCTGGCCGTATTGCAGTTGCTTCAGCTTCCCGATATCCGACGGTAGTGTNNNNNNNNGACACCAAAGGGTAACA	200 picomole Ultramer DNA Plate Oligo	Standard Desalting	Quantity Only	0.2
Plate 10	B11	44860_0367	CCAATCTCAAAAAGTCTCCGACACCTTCAGCTTCCCGATATCCGACGGTAGTGTNNNNNNNNCATAGTTTCAGTTTGTTTATC	200 picomole Ultramer DNA Plate Oligo	Standard Desalting	Quantity Only	0.2
Plate 10	B12	44892_0368	GCAGAAATCTTCTTGGAGAGGATCTTGGCTTCAGCTTCCCGATATCCGACGGTAGTGTNNNNNNNNGAGAGTACTTGAAGCTG	200 picomole Ultramer DNA Plate Oligo	Standard Desalting	Quantity Only	0.2
Plate 10	C01	44898_0369	CTCATGCACAAGAAGAATCAAGTCTTCCTTCAGCTTCCCGATATCCGACGGTAGTGTNNNNNNNNTGTGATTCCTCGTCGAGT	200 picomole Ultramer DNA Plate Oligo	Standard Desalting	Quantity Only	0.2
Plate 10	C02	44903_0370	GGGCTTGAAAGGGTTTCTTTGTTTCAGGCTTCAGCTTCCCGATATCCGACGGTAGTGTNNNNNNNNAGTCAATCATGCATAAA	200 picomole Ultramer DNA Plate Oligo	Standard Desalting	Quantity Only	0.2
Plate 10	C03	44948_0371	GTTAGGTTTCTATATTCTTAACGGATCGCTTCAGCTTCCCGATATCCGACGGTAGTGTNNNNNNNNCTTGCCGTTTGCATTGC	200 picomole Ultramer DNA Plate Oligo	Standard Desalting	Quantity Only	0.2
Plate 10	C04	44983_0372	CTCACCTCCACACAAATCAAACAAGCTTCAGCTTCCCGATATCCGACGGTAGTGTNNNNNNNNCAAGAAAATGAAGTGTAGAG	200 picomole Ultramer DNA Plate Oligo	Standard Desalting	Quantity Only	0.2
Plate 10	C05	45004_0373	GGGTTTTGTTTCTTCTCGATTGGCTCCTTCAGCTTCCCGATATCCGACGGTAGTGTNNNNNNNNTGGGCTCTGTGTTTTGAG	200 picomole Ultramer DNA Plate Oligo	Standard Desalting	Quantity Only	0.2
Plate 10	C06	45105_0374_SNP_a	GCTTGTTGAATCAAATTAGGGTTAGGGTTCTTCAGCTTCCCGATATCCGACGGTAGTGTNNNNNNNNAGGATGACAAACACGC	200 picomole Ultramer DNA Plate Oligo	Standard Desalting	Quantity Only	0.2
Plate 10	C07	45122_0376	CCAACTACGTCGTGGTCGAACAACGTTGGCTTCAGCTTCCCGATATCCGACGGTAGTGTNNNNNNNNAAAGGATAATCATACA	200 picomole Ultramer DNA Plate Oligo	Standard Desalting	Quantity Only	0.2
Plate 10	C08	45156_0377	AAATGGACACTGAACTGAAGACAAGCAACCTTCAGCTTCCCGATATCCGACGGTAGTGTNNNNNNNNGGTAAAAATGAGGAGA	200 picomole Ultramer DNA Plate Oligo	Standard Desalting	Quantity Only	0.2
Plate 10	C09	45181_0103	CACTCTCTTTGCACGTGTGCCTCTTCAGCTTCCCGATATCCGACGGTAGTGTNNNNNNNNGACGCAATGTACGCATTTCC	200 picomole Ultramer DNA Plate Oligo	Standard Desalting	Quantity Only	0.2
Plate 10	C10	45245_0378	GCTAATTACGAACGAGTTCGTAGTATCTCTTCAGCTTCCCGATATCCGACGGTAGTGTNNNNNNNNGGTCGTTTTGTGCACG	200 picomole Ultramer DNA Plate Oligo	Standard Desalting	Quantity Only	0.2
Plate 10	C11	45319_0379	GAACCGGGTTTTAATTTCCCAATTGATATCTTCAGCTTCCCGATATCCGACGGTAGTGTNNNNNNNNAGCATCTTCTTCTTCT	200 picomole Ultramer DNA Plate Oligo	Standard Desalting	Quantity Only	0.2
Plate 10	C12	45324_0380	GCATTAATAATGGCGTAAGTGGAAGAAAGCTTCAGCTTCCCGATATCCGACGGTAGTGTNNNNNNNNCCCAAAAGAAAAGAAA	200 picomole Ultramer DNA Plate Oligo	Standard Desalting	Quantity Only	0.2
Plate 10	D01	45327_0381	GTCGTGGCTTTAGTGAGTGGAGGCCTTCAGCTTCCCGATATCCGACGGTAGTGTNNNNNNNNGTCATGCTAGATTCCTAAAC	200 picomole Ultramer DNA Plate Oligo	Standard Desalting	Quantity Only	0.2
Plate 10	D02	45360_0382_SNP_a	CATCAGTTGGTTGTTGGGGAAAACCATGCTTCAGCTTCCCGATATCCGACGGTAGTGTNNNNNNNNATCAGGATGGAGAGGA	200 picomole Ultramer DNA Plate Oligo	Standard Desalting	Quantity Only	0.2
Plate 10	D03	45367_0383	TCCGGCACCAATCCCATCCTTCAGCTTCCCGATATCCGACGGTAGTGTNNNNNNNNGGTTTTCTAATTCCCCGAGAGTAACCA	200 picomole Ultramer DNA Plate Oligo	Standard Desalting	Quantity Only	0.2
Plate 10	D04	45388_0384	GATCGCTCCGAGATTTCTTATTGGTCTTCTTCAGCTTCCCGATATCCGACGGTAGTGTNNNNNNNNGGTCATGCTGGTAGTTT	200 picomole Ultramer DNA Plate Oligo	Standard Desalting	Quantity Only	0.2
Plate 10	D05	45398_0385	TGTGAAAAGCCGTGTGCTTGCTTTCCTCCTTCAGCTTCCCGATATCCGACGGTAGTGTNNNNNNNNCTGGGTCGTTCTACTC	200 picomole Ultramer DNA Plate Oligo	Standard Desalting	Quantity Only	0.2
Plate 10	D06	45420_0386	GAGGGAGGAGGAAACAAGGCGGTTGCAGACTTCAGCTTCCCGATATCCGACGGTAGTGTNNNNNNNNAGAGATGATGAATGGG	200 picomole Ultramer DNA Plate Oligo	Standard Desalting	Quantity Only	0.2
Plate 10	D07	45421_0387	GTCTCTGGTTTTGTATCTTTCGCTTCAGCTTCCCGATATCCGACGGTAGTGTNNNNNNNNGTGGTGGATGATGGTGTG	200 picomole Ultramer DNA Plate Oligo	Standard Desalting	Quantity Only	0.2
Plate 10	D08	45454_0388	GGCTCTCGAGCGAGACTTGGTAAAATCAGCTTCAGCTTCCCGATATCCGACGGTAGTGTNNNNNNNNTAAGAGTCAAGAAGGA	200 picomole Ultramer DNA Plate Oligo	Standard Desalting	Quantity Only	0.2
Plate 10	D09	45473_0389_SNP_a	GATGATAATCAGTTAGGACATACTGCTGGCTTCAGCTTCCCGATATCCGACGGTAGTGTNNNNNNNNTGGCGTTGCCGTACGT	200 picomole Ultramer DNA Plate Oligo	Standard Desalting	Quantity Only	0.2
Plate 10	D10	45503_0390	CAGCTTGCAAGGAAATCTCCCAACTCTTCAGCTTCCCGATATCCGACGGTAGTGTNNNNNNNNGGCGGTTGCTGTGTTT	200 picomole Ultramer DNA Plate Oligo	Standard Desalting	Quantity Only	0.2
Plate 10	D11	45513_0391	GCGACATGTACCATCCGATGATGTACGCTTCAGCTTCCCGATATCCGACGGTAGTGTNNNNNNNNTGAGTGGAGGTGGAGG	200 picomole Ultramer DNA Plate Oligo	Standard Desalting	Quantity Only	0.2
Plate 10	D12	45515_0392	GGTACTATGTAAACCGGTATTTCGGCTTCAGCTTCCCGATATCCGACGGTAGTGTNNNNNNNNTTTGTCTGTGTGGGAGG	200 picomole Ultramer DNA Plate Oligo	Standard Desalting	Quantity Only	0.2
Plate 10	E01	45525_0393	TTGTCGCTATATCGCTTCAGATTTCACCTTCAGCTTCCCGATATCCGACGGTAGTGTNNNNNNNNGTAACAGAGCTCTGTAG	200 picomole Ultramer DNA Plate Oligo	Standard Desalting	Quantity Only	0.2
Plate 10	E02	45540_0394	CAGTCGTTTACGATGATGTTCGCACTTCAGCTTCCCGATATCCGACGGTAGTGTNNNNNNNNAAACCAAATTAGACAGCCA	200 picomole Ultramer DNA Plate Oligo	Standard Desalting	Quantity Only	0.2
Plate 10	E03	45564_0395	GCTGCGCAGGCACGAGCCATTAAAGTTTCTTCAGCTTCCCGATATCCGACGGTAGTGTNNNNNNNNGCCAGAACACTAAAATC	200 picomole Ultramer DNA Plate Oligo	Standard Desalting	Quantity Only	0.2
Plate 10	E04	45577_0396	TCTCACTAGCCGGATTTCCCGCCAAGCCTTCAGCTTCCCGATATCCGACGGTAGTGTNNNNNNNNGATTAATCCGGTGGAG	200 picomole Ultramer DNA Plate Oligo	Standard Desalting	Quantity Only	0.2
Plate 10	E05	45602_0397	GTGTGTGTGTGAATTGATGATGTGCTTCAGCTTCCCGATATCCGACGGTAGTGTNNNNNNNNGGAATTGGGGGACGATG	200 picomole Ultramer DNA Plate Oligo	Standard Desalting	Quantity Only	0.2
Plate 10	E06	45622_0398	TCCCAGGAATATACCCAAGTAGCGTCCTTCAGCTTCCCGATATCCGACGGTAGTGTNNNNNNNNCTTTCCCAATGAAAAAGCT	200 picomole Ultramer DNA Plate Oligo	Standard Desalting	Quantity Only	0.2
Plate 10	E07	45639_0073	CAAATAATTTGGAGAAGACTTGAAAACACCTTCAGCTTCCCGATATCCGACGGTAGTGTNNNNNNNNGTGCTCTTGATCGCTG	200 picomole Ultramer DNA Plate Oligo	Standard Desalting	Quantity Only	0.2
Plate 10	E08	45654_0400	GGTCTCTGTCTCTATGTGGCTTCAGCTTCCCGATATCCGACGGTAGTGTNNNNNNNNTCTCCTTCAATACATCTTCTTGATC	200 picomole Ultramer DNA Plate Oligo	Standard Desalting	Quantity Only	0.2
Plate 10	E09	45678_0402	TCATATGCAGAGACACTCATGTGCTTCAGCTTCCCGATATCCGACGGTAGTGTNNNNNNNNGATGGTAACACGACAAAAAGC	200 picomole Ultramer DNA Plate Oligo	Standard Desalting	Quantity Only	0.2
Plate 10	E10	45781_0403	GTGGTGGGTTTGGTGGGCGTGGTGGTCTTCAGCTTCCCGATATCCGACGGTAGTGTNNNNNNNNAAAGTCCTGGAAGGAG	200 picomole Ultramer DNA Plate Oligo	Standard Desalting	Quantity Only	0.2
Plate 10	E11	45797_0404	GCATCCACAAGTACTTCATTGTGTCTTCTTCAGCTTCCCGATATCCGACGGTAGTGTNNNNNNNNTGTTGTTGTTGTTGTAGT	200 picomole Ultramer DNA Plate Oligo	Standard Desalting	Quantity Only	0.2
Plate 10	E12	45854_0405	TGTGGAAGAGATGTCCCAAAATCCTTCAGCTTCCCGATATCCGACGGTAGTGTNNNNNNNNGGAGAGAGAAAGAGAAGTGCG	200 picomole Ultramer DNA Plate Oligo	Standard Desalting	Quantity Only	0.2
Plate 10	F01	45871_0406	TTGTTTCTACCTGTTATACCCTCGAGTCTTCAGCTTCCCGATATCCGACGGTAGTGTNNNNNNNNCAAAGAAACCCTAGAA	200 picomole Ultramer DNA Plate Oligo	Standard Desalting	Quantity Only	0.2
Plate 10	F02	45897_0407	TTGCGTTACACCAGCACTTCCTCCCTTCAGCTTCCCGATATCCGACGGTAGTGTNNNNNNNNAATGGTCCGGTCTGACC	200 picomole Ultramer DNA Plate Oligo	Standard Desalting	Quantity Only	0.2
Plate 10	F03	45963_0408	GGTGGGTAACAATGGTATCAACTCTGTCTTCAGCTTCCCGATATCCGACGGTAGTGTNNNNNNNNCAATACAATCAAAACAGA	200 picomole Ultramer DNA Plate Oligo	Standard Desalting	Quantity Only	0.2
Plate 10	F04	45985_0409	ACGCACCCATATGCCAACACTTCAGCTTCCCGATATCCGACGGTAGTGTNNNNNNNNGTTTCAGTTTCATTGGCTGGG	200 picomole Ultramer DNA Plate Oligo	Standard Desalting	Quantity Only	0.2
Plate 10	F05	46010_0410	CATACGATTTCTTACCTAGCGATGCAGTGCTTCAGCTTCCCGATATCCGACGGTAGTGTNNNNNNNNCAAGAAACAGGTTGAC	200 picomole Ultramer DNA Plate Oligo	Standard Desalting	Quantity Only	0.2
Plate 10	F06	46042_0411	GTGTGTGAAGAAGCAGTTGAGAATTCAACCTTCAGCTTCCCGATATCCGACGGTAGTGTNNNNNNNNTTGTTCTCTTTCTCTC	200 picomole Ultramer DNA Plate Oligo	Standard Desalting	Quantity Only	0.2
Plate 10	F07	46044_0412	GTGGTCTTTGATCTGCTGATTTCGCTTCAGCTTCCCGATATCCGACGGTAGTGTNNNNNNNNTGTTGACAGATCTCCTCCGGT	200 picomole Ultramer DNA Plate Oligo	Standard Desalting	Quantity Only	0.2
Plate 10	F08	46060_0413	GCAAAGGGACATGTAGGCGCTTCTGACCTTCAGCTTCCCGATATCCGACGGTAGTGTNNNNNNNNAAACAAAGCCTAGAAA	200 picomole Ultramer DNA Plate Oligo	Standard Desalting	Quantity Only	0.2
Plate 10	F09	46105_0414_SNP_a	GGGAGGGTACGTTGAATAGGCATCACATCTTCAGCTTCCCGATATCCGACGGTAGTGTNNNNNNNNTCCGTCTACATCATCGG	200 picomole Ultramer DNA Plate Oligo	Standard Desalting	Quantity Only	0.2
Plate 10	F10	46108_0415	CGATGCTCTTAGTCGACAGATGAGCGAATCTTCAGCTTCCCGATATCCGACGGTAGTGTNNNNNNNNGACAAAGACACCAAAA	200 picomole Ultramer DNA Plate Oligo	Standard Desalting	Quantity Only	0.2
Plate 10	F11	46118_0416	AATTTTTCTCTACTTTGGTGAACTGGTTACTTCAGCTTCCCGATATCCGACGGTAGTGTNNNNNNNNGAAGATTGGATGAAAG	200 picomole Ultramer DNA Plate Oligo	Standard Desalting	Quantity Only	0.2
Plate 10	F12	46146_0417	GCTGGGAAACCAAAAGGCGGAATTACTGACTTCAGCTTCCCGATATCCGACGGTAGTGTNNNNNNNNCTGTTCTGTTGCTGTT	200 picomole Ultramer DNA Plate Oligo	Standard Desalting	Quantity Only	0.2
Plate 10	G01	46151_0418	CGTGTTTTGGTCGTCTGAGATCTCATCGGCTTCAGCTTCCCGATATCCGACGGTAGTGTNNNNNNNNGGAAGAAGCAGATATT	200 picomole Ultramer DNA Plate Oligo	Standard Desalting	Quantity Only	0.2
Plate 10	G02	46163_0419	GAATGAATGGTCGCCGGTGGAAAAGAGCTTCAGCTTCCCGATATCCGACGGTAGTGTNNNNNNNNAAAGGTGGGAGACACAG	200 picomole Ultramer DNA Plate Oligo	Standard Desalting	Quantity Only	0.2
Plate 10	G03	46206_0420_SNP_a	GCATGAGGAGAGCCGCCTTGAGGGTCTTCAGCTTCCCGATATCCGACGGTAGTGTNNNNNNNNGTGGTGGCTGAGCTTG	200 picomole Ultramer DNA Plate Oligo	Standard Desalting	Quantity Only	0.2
Plate 10	G04	46211_0421	CGGCTTGAAGAGTATATCGATTGGTTTCCCTTCAGCTTCCCGATATCCGACGGTAGTGTNNNNNNNNCATTTGGGAAGGTCTC	200 picomole Ultramer DNA Plate Oligo	Standard Desalting	Quantity Only	0.2
Plate 10	G05	46233_0422	CGGAGGTGGATCAGCGAGGAAAGTCTTCAGCTTCCCGATATCCGACGGTAGTGTNNNNNNNNAGAGGAGGAGGAGGAAGAGG	200 picomole Ultramer DNA Plate Oligo	Standard Desalting	Quantity Only	0.2
Plate 10	G06	46340_0423	GCACCACGTTGTCCGACTCTAGGGCTGGCTTCAGCTTCCCGATATCCGACGGTAGTGTNNNNNNNNAGGACACAAAGCCCAAA	200 picomole Ultramer DNA Plate Oligo	Standard Desalting	Quantity Only	0.2
Plate 10	G07	46357_0424	GGAAGGTATTGGTGGCAGTGAGCTTCAGCTTCCCGATATCCGACGGTAGTGTNNNNNNNNGAAGAGAGTGATGGAGAAG	200 picomole Ultramer DNA Plate Oligo	Standard Desalting	Quantity Only	0.2
Plate 10	G08	46381_0104	AGCCGACGACGGTGGCTCCGGCGGTGCACTTCAGCTTCCCGATATCCGACGGTAGTGTNNNNNNNNCAAAAAGAAAGCTCAG	200 picomole Ultramer DNA Plate Oligo	Standard Desalting	Quantity Only	0.2
Plate 10	G09	46402_0425	GCCTCAAATTGCTTGGAGAAACCAAAAGGCTTCAGCTTCCCGATATCCGACGGTAGTGTNNNNNNNNAGAGCAATATCAAGAG	200 picomole Ultramer DNA Plate Oligo	Standard Desalting	Quantity Only	0.2
Plate 10	G10	46501_0426	GTGTATTGTGATGAGTTTGCCAAGTTGGCTTCAGCTTCCCGATATCCGACGGTAGTGTNNNNNNNNAACAGAACCAATCCAAA	200 picomole Ultramer DNA Plate Oligo	Standard Desalting	Quantity Only	0.2
Plate 10	G11	46518_0427	GGAGATTTTGAGTAGGCCTTGGCTTCAGCTTCCCGATATCCGACGGTAGTGTNNNNNNNNAATTTCAAAAGGATGAAAAGGG	200 picomole Ultramer DNA Plate Oligo	Standard Desalting	Quantity Only	0.2
Plate 10	G12	46535_0428	GCTTAAGGTCCGATGGGGCTTCAGCTTCCCGATATCCGACGGTAGTGTNNNNNNNNTGCTGAGATTCTCGCTGAGGTG	200 picomole Ultramer DNA Plate Oligo	Standard Desalting	Quantity Only	0.2
Plate 10	H01	46549_0429	GGTCACCACTCACCACAATTCAAACATGCTTCAGCTTCCCGATATCCGACGGTAGTGTNNNNNNNNGAAATGGTTGGCATAG	200 picomole Ultramer DNA Plate Oligo	Standard Desalting	Quantity Only	0.2
Plate 10	H02	46580_0430	GTTGTTATGAAACCAGATTGGTTGGTGGCTTCAGCTTCCCGATATCCGACGGTAGTGTNNNNNNNNCACACATAATATCAACA	200 picomole Ultramer DNA Plate Oligo	Standard Desalting	Quantity Only	0.2
Plate 10	H03	46584_0105_SNP_a	GGGTAGTCAATGGGTAATAATTGTGTGTCTTCAGCTTCCCGATATCCGACGGTAGTGTNNNNNNNNGGAAATAAAGGTGAAGG	200 picomole Ultramer DNA Plate Oligo	Standard Desalting	Quantity Only	0.2
Plate 10	H04	46585_0431	TCTCCACTAGCCCAATATGCACTTCAGCTTCCCGATATCCGACGGTAGTGTNNNNNNNNGTGCACGTATTAGCGTTTTATGCT	200 picomole Ultramer DNA Plate Oligo	Standard Desalting	Quantity Only	0.2
Plate 10	H05	46606_0432	GACTGGAAATCGCAGAAAACACTGCCTTCAGCTTCCCGATATCCGACGGTAGTGTNNNNNNNNCAAATTCCTGCGAATAACAG	200 picomole Ultramer DNA Plate Oligo	Standard Desalting	Quantity Only	0.2
Plate 10	H06	46632_0106_SNP_a	GCGGGTGATTGGGGATTTGTGGTGCTTCAGCTTCCCGATATCCGACGGTAGTGTNNNNNNNNTTCTTAATCGGTCCGGTTATG	200 picomole Ultramer DNA Plate Oligo	Standard Desalting	Quantity Only	0.2
Plate 10	H07	46656_0433	GTCTTCCTTTCTTTGCACAGCAAGGCGGGCTTCAGCTTCCCGATATCCGACGGTAGTGTNNNNNNNNGAGAGAGTTTTGTATG	200 picomole Ultramer DNA Plate Oligo	Standard Desalting	Quantity Only	0.2
Plate 10	H08	46708_0434	CAGATGGGGGGAAATGGACGAAGACGACTTCAGCTTCCCGATATCCGACGGTAGTGTNNNNNNNNGGAGCACACACAGATAAG	200 picomole Ultramer DNA Plate Oligo	Standard Desalting	Quantity Only	0.2
Plate 10	H09	46800_0435	GAGGATGAAGACAAGAATGGCAAAACACGCTTCAGCTTCCCGATATCCGACGGTAGTGTNNNNNNNNGGAAAAAGAGAATGAG	200 picomole Ultramer DNA Plate Oligo	Standard Desalting	Quantity Only	0.2
Plate 10	H10	46815_0436	GTTGTTATGTTTTAAGGTAGTGTTTGGCTTCAGCTTCCCGATATCCGACGGTAGTGTNNNNNNNNTGGGAGATAGCCGAAGAG	200 picomole Ultramer DNA Plate Oligo	Standard Desalting	Quantity Only	0.2
Plate 10	H11	46884_0437_SNP_a	AAGGCGCAGCAACCAGCGGCGTAGACTTCAGCTTCCCGATATCCGACGGTAGTGTNNNNNNNNGATCATGCATTTGGTAAGTG	200 picomole Ultramer DNA Plate Oligo	Standard Desalting	Quantity Only	0.2
Plate 10	H12	46888_0107	GTGAGTGTGTGGCTCTTCTTCTGGTGGCTTCAGCTTCCCGATATCCGACGGTAGTGTNNNNNNNNATGAGAAGAAATGGAAG	200 picomole Ultramer DNA Plate Oligo	Standard Desalting	Quantity Only	0.2
Plate 11	A01	46915_0438	GCCACGGATTCGACTTTCATGGAGTTAGCTTCAGCTTCCCGATATCCGACGGTAGTGTNNNNNNNNTTGGGGAGACTGGAAAG	200 picomole Ultramer DNA Plate Oligo	Standard Desalting	Quantity Only	0.2
Plate 11	A02	46941_0439	GTTTTGGTCTTAGATGTTTGCGTTTACCTTCAGCTTCCCGATATCCGACGGTAGTGTNNNNNNNNGTTTTGGATCCAAGTGC	200 picomole Ultramer DNA Plate Oligo	Standard Desalting	Quantity Only	0.2
Plate 11	A03	46956_0108	GGGGTCTACGGAAATTCAACATGGAGTATCTTCAGCTTCCCGATATCCGACGGTAGTGTNNNNNNNNGGCCAAATTTAGAAGA	200 picomole Ultramer DNA Plate Oligo	Standard Desalting	Quantity Only	0.2
Plate 11	A04	47018_0440_SNP_a	GTGTGACAGGGAGGTGGCACTTGAGTTCCCTTCAGCTTCCCGATATCCGACGGTAGTGTNNNNNNNNAACACTGGCCTCAACC	200 picomole Ultramer DNA Plate Oligo	Standard Desalting	Quantity Only	0.2
Plate 11	A05	47029_0441	GATGAGGTTGATGATGATGCTCAGGAGCTTCAGCTTCCCGATATCCGACGGTAGTGTNNNNNNNNAAGAATTGAGAGACGTAG	200 picomole Ultramer DNA Plate Oligo	Standard Desalting	Quantity Only	0.2
Plate 11	A06	47059_0442	GGGACATTGTGAAGTGGCGGCGACTTCTTCAGCTTCCCGATATCCGACGGTAGTGTNNNNNNNNGTGCGGCAGGTGTCGATG	200 picomole Ultramer DNA Plate Oligo	Standard Desalting	Quantity Only	0.2
Plate 11	A07	47105_0443	CATGGTAGAACCGTTTCCCTTGTTGCCTTCAGCTTCCCGATATCCGACGGTAGTGTNNNNNNNNACCCAAAGTCAGTAAATCC	200 picomole Ultramer DNA Plate Oligo	Standard Desalting	Quantity Only	0.2
Plate 11	A08	47205_0444	TTTTTGTCTCCAAACTCCATCATGTTCCTTCAGCTTCCCGATATCCGACGGTAGTGTNNNNNNNNCATACACCTTTGTACTTC	200 picomole Ultramer DNA Plate Oligo	Standard Desalting	Quantity Only	0.2
Plate 11	A09	47236_0445	GATCAACGTGCAAAAGATGGGAGGCTCTTCAGCTTCCCGATATCCGACGGTAGTGTNNNNNNNNGAACCCAAAACAAAAAA	200 picomole Ultramer DNA Plate Oligo	Standard Desalting	Quantity Only	0.2
Plate 11	A10	47261_0446	TCTTTGTCTGTCTCTGTCCGAAACTCAGGCTTCAGCTTCCCGATATCCGACGGTAGTGTNNNNNNNNTGGCCTCGTGTAGAGA	200 picomole Ultramer DNA Plate Oligo	Standard Desalting	Quantity Only	0.2
Plate 11	A11	47276_0447	CAAGTTTTGTATAAAAAGGAAAGGATACACTTCAGCTTCCCGATATCCGACGGTAGTGTNNNNNNNNTGCGTGATTTGTTGGT	200 picomole Ultramer DNA Plate Oligo	Standard Desalting	Quantity Only	0.2
Plate 11	A12	47550_0449	GCAGCAGAAGGATGTGACATGTTCACGCTTCAGCTTCCCGATATCCGACGGTAGTGTNNNNNNNNAGATGCGTGGGTGTAT	200 picomole Ultramer DNA Plate Oligo	Standard Desalting	Quantity Only	0.2
Plate 11	B01	47571_0450	GGGGATTTACCTGCCAACAATCTGAGCTCTTCAGCTTCCCGATATCCGACGGTAGTGTNNNNNNNNCCAAAACGAGATATATC	200 picomole Ultramer DNA Plate Oligo	Standard Desalting	Quantity Only	0.2
Plate 11	B02	47587_0451	GTAGTAACCATAGCCATTGGAGAGACTTCAGCTTCCCGATATCCGACGGTAGTGTNNNNNNNNGAAACAAATGAATAGATCGG	200 picomole Ultramer DNA Plate Oligo	Standard Desalting	Quantity Only	0.2
Plate 11	B03	47589_0452	GCTTCGAAAATTCTGGATTCGTTTGAGGCTTCAGCTTCCCGATATCCGACGGTAGTGTNNNNNNNNAGACTACTGTGGAAACA	200 picomole Ultramer DNA Plate Oligo	Standard Desalting	Quantity Only	0.2
Plate 11	B04	47591_0453	CTGAGTTCTCTGCAAACTCCCTCCCCTTCAGCTTCCCGATATCCGACGGTAGTGTNNNNNNNNGGAATGTTCTGTTTCGTTGG	200 picomole Ultramer DNA Plate Oligo	Standard Desalting	Quantity Only	0.2
Plate 11	B05	47664_0455	CCCCCAAACTCATCTCTCTCTCTTTGCCTTCAGCTTCCCGATATCCGACGGTAGTGTNNNNNNNNCTTTGGTTTTCAGCGCCT	200 picomole Ultramer DNA Plate Oligo	Standard Desalting	Quantity Only	0.2
Plate 11	B06	47689_0109	GAGCAGCAATCTATTAGTACTTGAATTGCTTCAGCTTCCCGATATCCGACGGTAGTGTNNNNNNNNCCCTAAAACTTTCCTCA	200 picomole Ultramer DNA Plate Oligo	Standard Desalting	Quantity Only	0.2
Plate 11	B07	47847_0457	GTTCTGTTTTGTCCCCTGTTTTTGACTGTCTTCAGCTTCCCGATATCCGACGGTAGTGTNNNNNNNNACATGTGCTTCCAAAG	200 picomole Ultramer DNA Plate Oligo	Standard Desalting	Quantity Only	0.2
Plate 11	B08	47875_0459	GTTTGAGATTGATGCGGATGACTACATCCTTCAGCTTCCCGATATCCGACGGTAGTGTNNNNNNNNGTGGTTGTTGGAGATG	200 picomole Ultramer DNA Plate Oligo	Standard Desalting	Quantity Only	0.2
Plate 11	B09	47883_0460	GCACTTACTTTTCCATGAAACCCGACGATCTTCAGCTTCCCGATATCCGACGGTAGTGTNNNNNNNNAACAGAACAAGAAAAA	200 picomole Ultramer DNA Plate Oligo	Standard Desalting	Quantity Only	0.2
Plate 11	B10	47902_0461	GCAAGTTCTAGTGCTGTTGCAACGAGCTTCAGCTTCCCGATATCCGACGGTAGTGTNNNNNNNNCATGCTTTTTGCAGGTTT	200 picomole Ultramer DNA Plate Oligo	Standard Desalting	Quantity Only	0.2
Plate 11	B11	47995_0462	GCTCCAATGATGGGTTTATTTGTGGTCTTCAGCTTCCCGATATCCGACGGTAGTGTNNNNNNNNCATGATCTTAGAGAGGATG	200 picomole Ultramer DNA Plate Oligo	Standard Desalting	Quantity Only	0.2
Plate 11	B12	48004_0463	GAACCATTGGTAAACTATCGGTTCCGTCTTCAGCTTCCCGATATCCGACGGTAGTGTNNNNNNNNGTCCGTTGGTCTTTCCTG	200 picomole Ultramer DNA Plate Oligo	Standard Desalting	Quantity Only	0.2
Plate 11	C01	48025_0464	AACGGTCTCCCAGAGCTGCATCTCGCCTCTTCAGCTTCCCGATATCCGACGGTAGTGTNNNNNNNNAGGTATGCAAGATCAGA	200 picomole Ultramer DNA Plate Oligo	Standard Desalting	Quantity Only	0.2
Plate 11	C02	48087_0466	CGAGGACGATGAAGAAGGGGTATGAATCCTTCAGCTTCCCGATATCCGACGGTAGTGTNNNNNNNNGACAGTGAAGTGAAGG	200 picomole Ultramer DNA Plate Oligo	Standard Desalting	Quantity Only	0.2
Plate 11	C03	48115_0467	GCTGAAGATCCACAAGTTTCTGCTTTTGCTTCAGCTTCCCGATATCCGACGGTAGTGTNNNNNNNNGAGTTTAGTGTTTGGC	200 picomole Ultramer DNA Plate Oligo	Standard Desalting	Quantity Only	0.2
Plate 11	C04	48125_0468	CGAGTCTAGTCTTGTCCTTGGTAGCGCTTCAGCTTCCCGATATCCGACGGTAGTGTNNNNNNNNGGGGATCTGAGAAAATAG	200 picomole Ultramer DNA Plate Oligo	Standard Desalting	Quantity Only	0.2
Plate 11	C05	48178_0469	ATCTAATCGGAAGATTCAAGCGAGAAATCCTTCAGCTTCCCGATATCCGACGGTAGTGTNNNNNNNNCTTTCTTCTCTTCTTC	200 picomole Ultramer DNA Plate Oligo	Standard Desalting	Quantity Only	0.2
Plate 11	C06	48214_0471	CTTCTATCGACCACAAAATGAGTATAAACCTTCAGCTTCCCGATATCCGACGGTAGTGTNNNNNNNNTGTTTGGTCAAACTGT	200 picomole Ultramer DNA Plate Oligo	Standard Desalting	Quantity Only	0.2
Plate 11	C07	48247_0472	GGATATTATGTGGTGCTTGTGTCTCTATGCTTCAGCTTCCCGATATCCGACGGTAGTGTNNNNNNNNAGATAAGGCTGAGACA	200 picomole Ultramer DNA Plate Oligo	Standard Desalting	Quantity Only	0.2
Plate 11	C08	48253_0473	GCTAGGTGTTTGTATGTTTTAGCTTCAGCTTCCCGATATCCGACGGTAGTGTNNNNNNNNTGGTTGATTGATTTTGAGCCG	200 picomole Ultramer DNA Plate Oligo	Standard Desalting	Quantity Only	0.2
Plate 11	C09	48295_0474	GAATGTCCAACAAACAAACCGGTTCCCTTCAGCTTCCCGATATCCGACGGTAGTGTNNNNNNNNCCGAACCGTATTGTGTAG	200 picomole Ultramer DNA Plate Oligo	Standard Desalting	Quantity Only	0.2
Plate 11	C10	48310_0475	GAGGATCTCTTCCACAAGCAACGTCACTTCAGCTTCCCGATATCCGACGGTAGTGTNNNNNNNNTGTCCCGATGATGGATACG	200 picomole Ultramer DNA Plate Oligo	Standard Desalting	Quantity Only	0.2
Plate 11	C11	48412_0478	CGGTGGTATAGGCCGGTTAAGGAATCTTCAGCTTCCCGATATCCGACGGTAGTGTNNNNNNNNAGGGTTTTAGGTGTCG	200 picomole Ultramer DNA Plate Oligo	Standard Desalting	Quantity Only	0.2
Plate 11	C12	48418_0079	AATCTCTTCTTAGATCTCTCCGGCAATGGCTTCAGCTTCCCGATATCCGACGGTAGTGTNNNNNNNNTGGGGATATAATTCAA	200 picomole Ultramer DNA Plate Oligo	Standard Desalting	Quantity Only	0.2
Plate 11	D01	48568_0480	GCAAGTATGTTAGTGTTTGGCTCTGGCTTCAGCTTCCCGATATCCGACGGTAGTGTNNNNNNNNGCTCGATATTCAGCTTCG	200 picomole Ultramer DNA Plate Oligo	Standard Desalting	Quantity Only	0.2
Plate 11	D02	48573_0481	GCGGATAGTTAGGCGAAATTTTATGTTATCTTCAGCTTCCCGATATCCGACGGTAGTGTNNNNNNNNCGTTTTTGTGTTCTTT	200 picomole Ultramer DNA Plate Oligo	Standard Desalting	Quantity Only	0.2
Plate 11	D03	48654_0483	GCTTAGGCGATGAAGAAGCTGATATATCCTTCAGCTTCCCGATATCCGACGGTAGTGTNNNNNNNNACTAGCAGACGCAAAGG	200 picomole Ultramer DNA Plate Oligo	Standard Desalting	Quantity Only	0.2
Plate 11	D04	48673_0484	CTTGCTTCCTCGCTAGAAATCTCTCTTCAGCTTCCCGATATCCGACGGTAGTGTNNNNNNNNGTTTGTTGTTTTGTTTCTCCT	200 picomole Ultramer DNA Plate Oligo	Standard Desalting	Quantity Only	0.2
Plate 11	D05	48779_0485	GACTTGTGATTTGGGAAGTGATGGGTCCTTCAGCTTCCCGATATCCGACGGTAGTGTNNNNNNNNAAAGCCAGTGTGAGCG	200 picomole Ultramer DNA Plate Oligo	Standard Desalting	Quantity Only	0.2
Plate 11	D06	48813_0486	GTGGGGAGGTTTTGATGCTGTCTATGCTTCAGCTTCCCGATATCCGACGGTAGTGTNNNNNNNNGGCTCAAGGAGTTGAGG	200 picomole Ultramer DNA Plate Oligo	Standard Desalting	Quantity Only	0.2
Plate 11	D07	48964_0487	TTAGTCTTATATTCCCCATGTGCCTTCAGCTTCCCGATATCCGACGGTAGTGTNNNNNNNNGTAGATAAATACAAGCTTTAA	200 picomole Ultramer DNA Plate Oligo	Standard Desalting	Quantity Only	0.2
Plate 11	D08	48969_0488	GTGAGAGATGAATCTTGAGGAAGACCAGCTTCAGCTTCCCGATATCCGACGGTAGTGTNNNNNNNNCAAAGATTGGAGAATA	200 picomole Ultramer DNA Plate Oligo	Standard Desalting	Quantity Only	0.2
Plate 11	D09	48996_0489_SNP_a	GCAATCAAAAGTGTACATGAAGAAGCTTCAGCTTCCCGATATCCGACGGTAGTGTNNNNNNNNGCGGCTTTTCTTATCATTTT	200 picomole Ultramer DNA Plate Oligo	Standard Desalting	Quantity Only	0.2
Plate 11	D10	49050_0490	GCTGATGTTTACATGCATGATGCATGCTCCTTCAGCTTCCCGATATCCGACGGTAGTGTNNNNNNNNGAAGAACCTAGAATCT	200 picomole Ultramer DNA Plate Oligo	Standard Desalting	Quantity Only	0.2
Plate 11	D11	49057_0491_SNP_a	GTATCGATGGGTCTACGTGTCCTTCAGCTTCCCGATATCCGACGGTAGTGTNNNNNNNNAAACAAAACAACAACAACAAAA	200 picomole Ultramer DNA Plate Oligo	Standard Desalting	Quantity Only	0.2
Plate 11	D12	49114_0492	GCATAGGGCAGTAACAAACAGGGAAAACTTCAGCTTCCCGATATCCGACGGTAGTGTNNNNNNNNGGTGATACCATTGAGG	200 picomole Ultramer DNA Plate Oligo	Standard Desalting	Quantity Only	0.2
Plate 11	E01	49123_0493	CGTTAGGGTTCGCGGGGAGCGTGAACTACTTCAGCTTCCCGATATCCGACGGTAGTGTNNNNNNNNACAAACTCCGACAACGA	200 picomole Ultramer DNA Plate Oligo	Standard Desalting	Quantity Only	0.2
Plate 11	E02	49152_0494	CGGATTCTGATTTGGTTTCTTTGCTTCAGCTTCCCGATATCCGACGGTAGTGTNNNNNNNNCTCTTGCTTTCTCGCGCTCTTC	200 picomole Ultramer DNA Plate Oligo	Standard Desalting	Quantity Only	0.2
Plate 11	E03	49157_0495	TTATGCGTCGTCCCTATCTCCATGTTGGCTTCAGCTTCCCGATATCCGACGGTAGTGTNNNNNNNNGAAACGGTTTACGATAG	200 picomole Ultramer DNA Plate Oligo	Standard Desalting	Quantity Only	0.2
Plate 11	E04	49282_0497	GGAGGGTAATGGAATTGGAGAGAGCTTGTCTTCAGCTTCCCGATATCCGACGGTAGTGTNNNNNNNNAACCAAAAGTTTCAGG	200 picomole Ultramer DNA Plate Oligo	Standard Desalting	Quantity Only	0.2
Plate 11	E05	49346_0498	CCTATGATGATTACAGGAAAAGGTGCAAGCTTCAGCTTCCCGATATCCGACGGTAGTGTNNNNNNNNAATGGTTTTTGTTCTC	200 picomole Ultramer DNA Plate Oligo	Standard Desalting	Quantity Only	0.2
Plate 11	E06	49350_0499	TTGACGCCCTTGGAGTTTGTCTCCACTGCTTCAGCTTCCCGATATCCGACGGTAGTGTNNNNNNNNGCCAATAGTGTCAACAG	200 picomole Ultramer DNA Plate Oligo	Standard Desalting	Quantity Only	0.2
Plate 11	E07	49377_0113	CGTGTTGTTTTTCTGGTTTGGGCAAAGGCTTCAGCTTCCCGATATCCGACGGTAGTGTNNNNNNNNAAAAATACACCAAACA	200 picomole Ultramer DNA Plate Oligo	Standard Desalting	Quantity Only	0.2
Plate 11	E08	49468_0500	GCTGGAGGCTTGTTCGTCGCTTCAGCTTCCCGATATCCGACGGTAGTGTNNNNNNNNGTGGTTTCTTATCGGCGGTTT	200 picomole Ultramer DNA Plate Oligo	Standard Desalting	Quantity Only	0.2
Plate 11	E09	49484_0501	CCTAGCAGCGACGGTAAGAGAAGCCGCTCTTCAGCTTCCCGATATCCGACGGTAGTGTNNNNNNNNGGCTAAAGGACCAAAAG	200 picomole Ultramer DNA Plate Oligo	Standard Desalting	Quantity Only	0.2
Plate 11	E10	49551_0502	GCGACGGTTTATTGTTATGCATCAGCATCTTCAGCTTCCCGATATCCGACGGTAGTGTNNNNNNNNGATGATGAATTTTAGGG	200 picomole Ultramer DNA Plate Oligo	Standard Desalting	Quantity Only	0.2
Plate 11	E11	49612_0504	CTATTCGACAAAGATGGTGATGGATGCCTTCAGCTTCCCGATATCCGACGGTAGTGTNNNNNNNNGAAGAAGACTACTAAGCA	200 picomole Ultramer DNA Plate Oligo	Standard Desalting	Quantity Only	0.2
Plate 11	E12	49737_0507	GGGGGTCGGATTACATTTCCTTTGAGCTTCAGCTTCCCGATATCCGACGGTAGTGTNNNNNNNNGGGTTTTAAGGATTCGAGG	200 picomole Ultramer DNA Plate Oligo	Standard Desalting	Quantity Only	0.2
Plate 11	F01	49738_0508	GCAAGGTTCTTGTAAGAGACAGAGAGCTTCAGCTTCCCGATATCCGACGGTAGTGTNNNNNNNNATTGGGGATTATGGGCGG	200 picomole Ultramer DNA Plate Oligo	Standard Desalting	Quantity Only	0.2
Plate 11	F02	49776_0509	GATGCTAAGTGAGTGAACCTTTTTTCCTTCAGCTTCCCGATATCCGACGGTAGTGTNNNNNNNNCTCAAATCCATTATAAGAA	200 picomole Ultramer DNA Plate Oligo	Standard Desalting	Quantity Only	0.2
Plate 11	F03	49780_0510	GAATCCAACGGCTTCCGACTCACCTGTTCTTCAGCTTCCCGATATCCGACGGTAGTGTNNNNNNNNGAGGTAGACATGAATGG	200 picomole Ultramer DNA Plate Oligo	Standard Desalting	Quantity Only	0.2
Plate 11	F04	49798_0511	CTGCTCTCTCTTGTTGCACTTCAGCTTCCCGATATCCGACGGTAGTGTNNNNNNNNCCTCAATTTCTTCTCTTGAAGTTTCG	200 picomole Ultramer DNA Plate Oligo	Standard Desalting	Quantity Only	0.2
Plate 11	F05	49828_0512	GGGTTATTAGCGCGTATACGTGTGTCTTCAGCTTCCCGATATCCGACGGTAGTGTNNNNNNNNCGGAAAGAAGAGCTGG	200 picomole Ultramer DNA Plate Oligo	Standard Desalting	Quantity Only	0.2
Plate 11	F06	49848_0513	GGGTTAACCACACCAGGGACATGGTTTCCTTCAGCTTCCCGATATCCGACGGTAGTGTNNNNNNNNACAAAAAACTAAAATGC	200 picomole Ultramer DNA Plate Oligo	Standard Desalting	Quantity Only	0.2
Plate 11	F07	49881_0514	CGGTACGAGTCTTGAAGCCAGCTGCCTTCAGCTTCCCGATATCCGACGGTAGTGTNNNNNNNNGTTCCCTGGACGTGAGAAA	200 picomole Ultramer DNA Plate Oligo	Standard Desalting	Quantity Only	0.2
Plate 11	F08	49888_0515	TCACTCTGGCCCTTACTAAACCACCCTTCAGCTTCCCGATATCCGACGGTAGTGTNNNNNNNNGCAATAGAAATCTATCGC	200 picomole Ultramer DNA Plate Oligo	Standard Desalting	Quantity Only	0.2
Plate 11	F09	49890_0516	GTGATGAGAGTCACCACAACAAATTCGTTCTTCAGCTTCCCGATATCCGACGGTAGTGTNNNNNNNNCATCTATGATCTATCT	200 picomole Ultramer DNA Plate Oligo	Standard Desalting	Quantity Only	0.2
Plate 11	F10	49976_0517	GTGGGTTAGCTTGTGGATGTTTGGCTTCAGCTTCCCGATATCCGACGGTAGTGTNNNNNNNNAGGATCTCTGTAGCTGGAG	200 picomole Ultramer DNA Plate Oligo	Standard Desalting	Quantity Only	0.2
Plate 11	F11	49999_0518	GTTTGGTCTAGGAACCGGGCAAGCGAAGCTTCAGCTTCCCGATATCCGACGGTAGTGTNNNNNNNNGGTCCACGAGAAAAAC	200 picomole Ultramer DNA Plate Oligo	Standard Desalting	Quantity Only	0.2
Plate 11	F12	50000_0116	CGAAGGGATCATGCATCCACTTTGTGTTCTTCAGCTTCCCGATATCCGACGGTAGTGTNNNNNNNNAAAAGGAAAACTCGTAC	200 picomole Ultramer DNA Plate Oligo	Standard Desalting	Quantity Only	0.2
Plate 11	G01	50053_0519	CGTACAAAGGAGTGTATCGTTTAGCCTTCAGCTTCCCGATATCCGACGGTAGTGTNNNNNNNNAGAGAGAAACTGGAGAG	200 picomole Ultramer DNA Plate Oligo	Standard Desalting	Quantity Only	0.2
Plate 11	G02	50058_0520	GCTTCTGGTGCTGGTATTGGTGGCTTCAGCTTCCCGATATCCGACGGTAGTGTNNNNNNNNCAAAGGTGTAGACCAAA	200 picomole Ultramer DNA Plate Oligo	Standard Desalting	Quantity Only	0.2
Plate 11	G03	50059_0521	GCTCTGCTTCTTGTTGATTGTCTTCAGCTTCCCGATATCCGACGGTAGTGTNNNNNNNNTAAGAAGCCTCTAAATTAAAAACC	200 picomole Ultramer DNA Plate Oligo	Standard Desalting	Quantity Only	0.2
Plate 11	G04	50060_0522	GCTAAGGCAGAAGATCATATACTGTCCTTCAGCTTCCCGATATCCGACGGTAGTGTNNNNNNNNGGTGCCATGTTTTTAAGTT	200 picomole Ultramer DNA Plate Oligo	Standard Desalting	Quantity Only	0.2
Plate 11	G05	50081_0523	TACCTTACGGCGTCCAGCTTCAACGTCCTTCAGCTTCCCGATATCCGACGGTAGTGTNNNNNNNNCTGATTGCATGCGTTAG	200 picomole Ultramer DNA Plate Oligo	Standard Desalting	Quantity Only	0.2
Plate 11	G06	50098_0524	AAGGCCAAGAGAAGAAGGCGTCCTTCAGCTTCCCGATATCCGACGGTAGTGTNNNNNNNNGGGAGTTGTGGGAGGGTA	200 picomole Ultramer DNA Plate Oligo	Standard Desalting	Quantity Only	0.2
Plate 11	G07	50113_0525	ACACACAAAGAAAATAACCATGATAGACTTCAGCTTCCCGATATCCGACGGTAGTGTNNNNNNNNGTTGTCGCCGTGTGATG	200 picomole Ultramer DNA Plate Oligo	Standard Desalting	Quantity Only	0.2
Plate 11	G08	50290_0526	TCAATGATCCTTCCACCGATTGGCTCCTTCAGCTTCCCGATATCCGACGGTAGTGTNNNNNNNNCTCCAGGCTCCTCTTT	200 picomole Ultramer DNA Plate Oligo	Standard Desalting	Quantity Only	0.2
Plate 11	G09	50297_0527	GGTAGAGGTGTTGTTAGGTGTTTCTTCAGCTTCCCGATATCCGACGGTAGTGTNNNNNNNNGGGAAAAGAGTGTCTCG	200 picomole Ultramer DNA Plate Oligo	Standard Desalting	Quantity Only	0.2
Plate 11	G10	50332_0528	GCCTAGTCTTCTTGCCGCTGATTCAATCCTTCAGCTTCCCGATATCCGACGGTAGTGTNNNNNNNNTTAGGGTTAGGGTTTT	200 picomole Ultramer DNA Plate Oligo	Standard Desalting	Quantity Only	0.2
Plate 11	G11	50333_0529	GTCCTGCAGGAACATAAGGATATTGCTTCAGCTTCCCGATATCCGACGGTAGTGTNNNNNNNNTTGGGTTTGGTTCTGCTG	200 picomole Ultramer DNA Plate Oligo	Standard Desalting	Quantity Only	0.2
Plate 11	G12	50391_0530	GGTGGTGGCGATAGCTTTTGCTTTTCTTCAGCTTCCCGATATCCGACGGTAGTGTNNNNNNNNGGGGATTTCTTCTTCCTGTG	200 picomole Ultramer DNA Plate Oligo	Standard Desalting	Quantity Only	0.2
Plate 11	H01	50551_0531	ACATTGGCTTAGGCTGAGTCCCCTTCAGCTTCCCGATATCCGACGGTAGTGTNNNNNNNNTTCCGGTTTTTAGTTCCTCCATC	200 picomole Ultramer DNA Plate Oligo	Standard Desalting	Quantity Only	0.2
Plate 11	H02	50566_0532	GCGGGACGAGAGTGGAATGGAGTGCTTCAGCTTCCCGATATCCGACGGTAGTGTNNNNNNNNAGATGCTACAAAGCCGAAGA	200 picomole Ultramer DNA Plate Oligo	Standard Desalting	Quantity Only	0.2
Plate 11	H03	50607_0117	GTGGTAGCATTAGAAGTTAGAACTGCTTCAGCTTCCCGATATCCGACGGTAGTGTNNNNNNNNGTGTGTCTCAGTGTGTG	200 picomole Ultramer DNA Plate Oligo	Standard Desalting	Quantity Only	0.2
Plate 11	H04	50630_0533	GTATCACATACTTCATTTATAGTACAGTGCTTCAGCTTCCCGATATCCGACGGTAGTGTNNNNNNNNTGGAGGGTTTGATGCA	200 picomole Ultramer DNA Plate Oligo	Standard Desalting	Quantity Only	0.2
Plate 11	H05	50677_0534	GTAACTCACTAGTTTTAAAAGGAAAAGTCCTTCAGCTTCCCGATATCCGACGGTAGTGTNNNNNNNNGGATCTAATGCAGATG	200 picomole Ultramer DNA Plate Oligo	Standard Desalting	Quantity Only	0.2
Plate 11	H06	50744_0536	GCTCGAAGAGCTGAGAGGAGTGCTTCAGCTTCCCGATATCCGACGGTAGTGTNNNNNNNNAGTTTTGTCTTTGGTAATAGAG	200 picomole Ultramer DNA Plate Oligo	Standard Desalting	Quantity Only	0.2
Plate 11	H07	50752_0537	CAACTCTCCGGCATAATATTGTTTGGCTTCAGCTTCCCGATATCCGACGGTAGTGTNNNNNNNNTCTCCTTCTTCTTTTTCTT	200 picomole Ultramer DNA Plate Oligo	Standard Desalting	Quantity Only	0.2
Plate 11	H08	50761_0538	GCTTACTTGTCCGTTATGTCGTGGCTTCAGCTTCCCGATATCCGACGGTAGTGTNNNNNNNNAGGAGAAGCTGCATCT	200 picomole Ultramer DNA Plate Oligo	Standard Desalting	Quantity Only	0.2
Plate 11	H09	50787_0539	GAACTTGTGCCGTGTAGTGTTTGATTTCCTTCAGCTTCCCGATATCCGACGGTAGTGTNNNNNNNNGCTTCTGACTCGGGTTT	200 picomole Ultramer DNA Plate Oligo	Standard Desalting	Quantity Only	0.2
Plate 11	H10	50790_0540	GCTATCTGGGTCCAGAAACGATTCACGCCTTCAGCTTCCCGATATCCGACGGTAGTGTNNNNNNNNTTCTCTCTCTTCTTCT	200 picomole Ultramer DNA Plate Oligo	Standard Desalting	Quantity Only	0.2
Plate 11	H11	50810_0541	GAGATTAGCGAGGTCACGAGGATCCAATCCTTCAGCTTCCCGATATCCGACGGTAGTGTNNNNNNNNAGGTTAATGTCCGGGG	200 picomole Ultramer DNA Plate Oligo	Standard Desalting	Quantity Only	0.2
Plate 11	H12	50858_0542	GTCGATCTTTCTCTGTTTCCTCTTGCTTCAGCTTCCCGATATCCGACGGTAGTGTNNNNNNNNTCTTTGACTTAGTCAATGTG	200 picomole Ultramer DNA Plate Oligo	Standard Desalting	Quantity Only	0.2
Plate 12	A01	50942_0543	GCTGATGAGGTTGATGATTGGGGGAAAGACTTCAGCTTCCCGATATCCGACGGTAGTGTNNNNNNNNTGGTGGAAGAATTGGG	200 picomole Ultramer DNA Plate Oligo	Standard Desalting	Quantity Only	0.2
Plate 12	A02	51021_0544_SNP_a	GAGGAGGAGGTAGAGAGATGAGAATCTTCAGCTTCCCGATATCCGACGGTAGTGTNNNNNNNNGGGAGAGAAACAACAA	200 picomole Ultramer DNA Plate Oligo	Standard Desalting	Quantity Only	0.2
Plate 12	A03	51026_0545	GCATTATTTTGTTTCTTTTGGGTGTCTTCAGCTTCCCGATATCCGACGGTAGTGTNNNNNNNNGTCAATTGTGTCCTTCTTGT	200 picomole Ultramer DNA Plate Oligo	Standard Desalting	Quantity Only	0.2
Plate 12	A04	51032_0546_SNP_a	CATTGCTATCAAGTTGCGTGTGCTTCAGCTTCCCGATATCCGACGGTAGTGTNNNNNNNNTTGGGCTTAGGTTTCAGAAG	200 picomole Ultramer DNA Plate Oligo	Standard Desalting	Quantity Only	0.2
Plate 12	A05	51238_0548	TTCCCCCCAATTTCTAGGTCTTCAGCTTCCCGATATCCGACGGTAGTGTNNNNNNNNGAGTGAGATTTGGTGGTGGTGTAGGT	200 picomole Ultramer DNA Plate Oligo	Standard Desalting	Quantity Only	0.2
Plate 12	A06	51315_0550	GCGGTTGAAGTAGTTTGTAGGTCTTTGCTTCAGCTTCCCGATATCCGACGGTAGTGTNNNNNNNNGGTGTTGTTGATCAGATG	200 picomole Ultramer DNA Plate Oligo	Standard Desalting	Quantity Only	0.2
Plate 12	A07	51316_0551	TGACTTTTTTTAGGGCTTTTACTCTGTTGCTTCAGCTTCCCGATATCCGACGGTAGTGTNNNNNNNNAAAAAAACGGCGAGAG	200 picomole Ultramer DNA Plate Oligo	Standard Desalting	Quantity Only	0.2
Plate 12	A08	51369_0552	GCTGTGTTTCCAAAGTATGAAGCAAAACCTTCAGCTTCCCGATATCCGACGGTAGTGTNNNNNNNNTACCTTCTTCTCCTCC	200 picomole Ultramer DNA Plate Oligo	Standard Desalting	Quantity Only	0.2
Plate 12	A09	51370_0553	TGATGTCTCCCTCACTCACATGGACTTCAGCTTCCCGATATCCGACGGTAGTGTNNNNNNNNGCGAGAAAGAAGATGGTGGT	200 picomole Ultramer DNA Plate Oligo	Standard Desalting	Quantity Only	0.2
Plate 12	A10	51373_0554	ATCTTGTCGTGGATGCTTTGAGCTCAACGCTTCAGCTTCCCGATATCCGACGGTAGTGTNNNNNNNNGTAGAGAGATTTACGG	200 picomole Ultramer DNA Plate Oligo	Standard Desalting	Quantity Only	0.2
Plate 12	A11	51405_0555	GCTTTGGCTCGTGCACTTTCTCTTCAGCTTCCCGATATCCGACGGTAGTGTNNNNNNNNGGTGGTACGTAGTTAATGTTCGAG	200 picomole Ultramer DNA Plate Oligo	Standard Desalting	Quantity Only	0.2
Plate 12	A12	51432_0556_SNP_a	ACTCTCGATCTTGCGATGTTCCCTCACTTCAGCTTCCCGATATCCGACGGTAGTGTNNNNNNNNTCCGATTAGTGTCCGA	200 picomole Ultramer DNA Plate Oligo	Standard Desalting	Quantity Only	0.2
Plate 12	B01	52442_0558	GGGTTAGGGTTAACAACCGAGGTCCCTTCAGCTTCCCGATATCCGACGGTAGTGTNNNNNNNNGGTCTGATTGGTTGTG	200 picomole Ultramer DNA Plate Oligo	Standard Desalting	Quantity Only	0.2
Plate 12	B02	52594_0559	CGATGATCAGCTTCAAGAACAATACAGTGCTTCAGCTTCCCGATATCCGACGGTAGTGTNNNNNNNNAAAAGAACAACAAAGA	200 picomole Ultramer DNA Plate Oligo	Standard Desalting	Quantity Only	0.2
Plate 12	B03	52595_0560	GTGTTTGGTGATCGTAAGTTCGGTGCTTCAGCTTCCCGATATCCGACGGTAGTGTNNNNNNNNTGGAGTGGTTCGTTGT	200 picomole Ultramer DNA Plate Oligo	Standard Desalting	Quantity Only	0.2
Plate 12	B04	52650_0562	GCTTCTTTCCATTCTTGGATCATCTGCGTCTTCAGCTTCCCGATATCCGACGGTAGTGTNNNNNNNNGCCTCCTCCGCCTTCT	200 picomole Ultramer DNA Plate Oligo	Standard Desalting	Quantity Only	0.2
Plate 12	B05	52814_0563	GCTGGCTACATTATTTTATAGTTGAGAGACTTCAGCTTCCCGATATCCGACGGTAGTGTNNNNNNNNTTAGTGTTGGTTTTGT	200 picomole Ultramer DNA Plate Oligo	Standard Desalting	Quantity Only	0.2
Plate 12	B06	52829_0564	GAGGGATAATGTATATTACACAAGTGAACCTTCAGCTTCCCGATATCCGACGGTAGTGTNNNNNNNNCGAACATATGTAGAGG	200 picomole Ultramer DNA Plate Oligo	Standard Desalting	Quantity Only	0.2
Plate 12	B07	52833_0565	GACTGGACTGAGGCAACAACAAAATAAACCTTCAGCTTCCCGATATCCGACGGTAGTGTNNNNNNNNGTGAAAGTTGGGATGG	200 picomole Ultramer DNA Plate Oligo	Standard Desalting	Quantity Only	0.2
Plate 12	B08	52842_0566	GCAACAATGGAGTCGTCATCCGTGAGCTTCAGCTTCCCGATATCCGACGGTAGTGTNNNNNNNNTGCGAAGTGTGTGGTATG	200 picomole Ultramer DNA Plate Oligo	Standard Desalting	Quantity Only	0.2
Plate 12	B09	52977_0567	GCTGGTGGTATAGTTCCTCAAGTGGCTTCAGCTTCCCGATATCCGACGGTAGTGTNNNNNNNNGACAAAGCTTCAAGATATG	200 picomole Ultramer DNA Plate Oligo	Standard Desalting	Quantity Only	0.2
Plate 12	B10	52995_0568	CGAAACAACCACCAAAGTTCATATGTATTCTTCAGCTTCCCGATATCCGACGGTAGTGTNNNNNNNNTCTTCTTCTTCCCCTT	200 picomole Ultramer DNA Plate Oligo	Standard Desalting	Quantity Only	0.2
Plate 12	B11	53030_0569	GATGGGGCAGTGAAGTAACACATACATCCCTTCAGCTTCCCGATATCCGACGGTAGTGTNNNNNNNNATAAGTGTCCTTTCTA	200 picomole Ultramer DNA Plate Oligo	Standard Desalting	Quantity Only	0.2
Plate 12	B12	53422_0032	AAACAATTTTTTCCATGCGTTTTTTTCCTCTTCAGCTTCCCGATATCCGACGGTAGTGTNNNNNNNNGTTGAGAGAGAGAGAG	200 picomole Ultramer DNA Plate Oligo	Standard Desalting	Quantity Only	0.2
Plate 12	C01	54101_0577	TTTACTGCATCATAAATCTTGTTCTTCGCCTTCAGCTTCCCGATATCCGACGGTAGTGTNNNNNNNNATGCCAAGTCACTATT	200 picomole Ultramer DNA Plate Oligo	Standard Desalting	Quantity Only	0.2
Plate 12	C02	54461_0089	GTTCGACGAAGCAATTGCCATGAATAACTTCAGCTTCCCGATATCCGACGGTAGTGTNNNNNNNNCCTCCTACAGAAACAAC	200 picomole Ultramer DNA Plate Oligo	Standard Desalting	Quantity Only	0.2
Plate 12	C03	54519_0579	GCGAGTCCGGATGGACCACGTATCTTCAGCTTCCCGATATCCGACGGTAGTGTNNNNNNNNTCCATTATACAAGCAAAAACAC	200 picomole Ultramer DNA Plate Oligo	Standard Desalting	Quantity Only	0.2
Plate 12	C04	54632_0123_SNP_a	GAAGATTAAGAAGAAAGAGAAATTGAGAACTTCAGCTTCCCGATATCCGACGGTAGTGTNNNNNNNNAGAGAGAGAGGCGCTA	200 picomole Ultramer DNA Plate Oligo	Standard Desalting	Quantity Only	0.2
Plate 12	C05	54974_0580_SNP_a	GATGTTTCCCATGACCCCATTATCTTCAGCTTCCCGATATCCGACGGTAGTGTNNNNNNNNCCTCATCAAAACGGTTAGTGTT	200 picomole Ultramer DNA Plate Oligo	Standard Desalting	Quantity Only	0.2
Plate 12	C06	55219_0125	GTGTGCGTAAGAATTATGGAAGAGAGCTTCAGCTTCCCGATATCCGACGGTAGTGTNNNNNNNNAGAATCGGTACCACCGAT	200 picomole Ultramer DNA Plate Oligo	Standard Desalting	Quantity Only	0.2
Plate 12	C07	55603_0581_SNP_a	GCGAAAGTGATGGCCACAACTTCAGCTTCCCGATATCCGACGGTAGTGTNNNNNNNNTAAATGAGATTCCACGGTAAGTTGTT	200 picomole Ultramer DNA Plate Oligo	Standard Desalting	Quantity Only	0.2
Plate 12	C08	55694_0582_SNP_a	GCTCACGTCGTGTGAGAGAGAGCTTCAGCTTCCCGATATCCGACGGTAGTGTNNNNNNNNACCAAATTTTAGGTCAGAAA	200 picomole Ultramer DNA Plate Oligo	Standard Desalting	Quantity Only	0.2
Plate 12	C09	55730_0583	GAAGGGGAAGGTAGAAGTGAGTCAAGAACCTTCAGCTTCCCGATATCCGACGGTAGTGTNNNNNNNNATGGCTTCTTCTGTGT	200 picomole Ultramer DNA Plate Oligo	Standard Desalting	Quantity Only	0.2
Plate 12	C10	56123_0584	GTCACCACATAAATTGGGTTATGGGCTTCCTTCAGCTTCCCGATATCCGACGGTAGTGTNNNNNNNNGAGTTTGGCGAAGAAG	200 picomole Ultramer DNA Plate Oligo	Standard Desalting	Quantity Only	0.2
Plate 12	C11	56739_0585	GCGAGAGTGACGACCACAGTCTTCAGCTTCCCGATATCCGACGGTAGTGTNNNNNNNNTCTAGTTTCTTAGCCTTTTGTTCTT	200 picomole Ultramer DNA Plate Oligo	Standard Desalting	Quantity Only	0.2
Plate 12	C12	56958_0128	CTCCATAGAGTTGTTTTCTCAATCGGGTCCTTCAGCTTCCCGATATCCGACGGTAGTGTNNNNNNNNGCCAAGAGGGAAAAGG	200 picomole Ultramer DNA Plate Oligo	Standard Desalting	Quantity Only	0.2
Plate 12	D01	56991_0586	GAATCGTCGATCTGGACTTGGAATCCTTCAGCTTCCCGATATCCGACGGTAGTGTNNNNNNNNTATAGGGGTGGGTGTG	200 picomole Ultramer DNA Plate Oligo	Standard Desalting	Quantity Only	0.2
Plate 12	D02	57024_0587	GTTGTTTTTTTGTTGGATGGTCGTGGAGCTTCAGCTTCCCGATATCCGACGGTAGTGTNNNNNNNNACTCTTCACTTTTCTT	200 picomole Ultramer DNA Plate Oligo	Standard Desalting	Quantity Only	0.2
Plate 12	D03	57069_0588	GCATGAGGACCTTGGTTCCCTTCAGCTTCCCGATATCCGACGGTAGTGTNNNNNNNNGCTTCAGTTTTCCTCTTTTTGGCGC	200 picomole Ultramer DNA Plate Oligo	Standard Desalting	Quantity Only	0.2
Plate 12	D04	57260_0589	GGAATTCGATGAGAAGAGAATAAGGTAAGCTTCAGCTTCCCGATATCCGACGGTAGTGTNNNNNNNNGAAAAAAGAAGTAAAA	200 picomole Ultramer DNA Plate Oligo	Standard Desalting	Quantity Only	0.2
Plate 12	D05	57572_0590	GAAATGGACCGCATTCTCGAACTTCAGCTTCCCGATATCCGACGGTAGTGTNNNNNNNNGTTTGTGTGGTGGTGTCTCTGG	200 picomole Ultramer DNA Plate Oligo	Standard Desalting	Quantity Only	0.2
Plate 12	D06	57632_0592_SNP_a	GCCGAGGCGGAGAAAGTGCTCCCGATCCTTCAGCTTCCCGATATCCGACGGTAGTGTNNNNNNNNTTTCGGCTTTTCACGCGT	200 picomole Ultramer DNA Plate Oligo	Standard Desalting	Quantity Only	0.2
Plate 12	D07	58003_0129	GCAACAGAGTATTTTTCAGGAACCCTTCAGCTTCCCGATATCCGACGGTAGTGTNNNNNNNNCATGCAACGATTACTGCCATT	200 picomole Ultramer DNA Plate Oligo	Standard Desalting	Quantity Only	0.2
Plate 12	D08	58050_0593	ATCAGGCCTCTACACCCCAGGAATCAGACCTTCAGCTTCCCGATATCCGACGGTAGTGTNNNNNNNNGACCAAGTTTACCCTC	200 picomole Ultramer DNA Plate Oligo	Standard Desalting	Quantity Only	0.2
Plate 12	D09	58112_0594	CGACTCAGGAGATTACGTTGACGACGGACTTCAGCTTCCCGATATCCGACGGTAGTGTNNNNNNNNGAAGAAAACATCAAAT	200 picomole Ultramer DNA Plate Oligo	Standard Desalting	Quantity Only	0.2
Plate 12	D10	58122_0595_SNP_a	GCGATGATGAGTAGTGAATTGGTTTTCTTCTTCAGCTTCCCGATATCCGACGGTAGTGTNNNNNNNNACTGATGAAGAGAAAA	200 picomole Ultramer DNA Plate Oligo	Standard Desalting	Quantity Only	0.2
Plate 12	D11	58128_0596	CATGATTAATTTACGAGACTAGACCAGCACTTCAGCTTCCCGATATCCGACGGTAGTGTNNNNNNNNGAGAACTTGTAGTTCA	200 picomole Ultramer DNA Plate Oligo	Standard Desalting	Quantity Only	0.2
Plate 12	D12	58132_0090	ATGTGGCCAACTCACATGATGTGTTTCGCTTCAGCTTCCCGATATCCGACGGTAGTGTNNNNNNNNAATATCTTGCTCGAAAG	200 picomole Ultramer DNA Plate Oligo	Standard Desalting	Quantity Only	0.2
Plate 12	E01	58167_0598	GATTAGGTTAAGGGGTTTTAGTCTTTTCCTTCAGCTTCCCGATATCCGACGGTAGTGTNNNNNNNNTGTGAAGATGATGGAG	200 picomole Ultramer DNA Plate Oligo	Standard Desalting	Quantity Only	0.2
Plate 12	E02	58463_0599	CACATAAAGAAGAACAGCCCCAGACTCTTCAGCTTCCCGATATCCGACGGTAGTGTNNNNNNNNGCGTTTCCGTTTTTCTT	200 picomole Ultramer DNA Plate Oligo	Standard Desalting	Quantity Only	0.2
Plate 12	E03	58651_0600	TTCCTTGAACTCGGAGATCTGGTCCTTCAGCTTCCCGATATCCGACGGTAGTGTNNNNNNNNCAAATCACATGAAACAATAA	200 picomole Ultramer DNA Plate Oligo	Standard Desalting	Quantity Only	0.2
Plate 12	E04	58749_0601	TATTTTGGGTAAGGATCGTGGAAGAGGCTTCAGCTTCCCGATATCCGACGGTAGTGTNNNNNNNNGAGATCGAATTGTTTACG	200 picomole Ultramer DNA Plate Oligo	Standard Desalting	Quantity Only	0.2
Plate 12	E05	58794_0605	CACCGGTTCGTTCCGATGGACCTTCTTCAGCTTCCCGATATCCGACGGTAGTGTNNNNNNNNCATATTTTCTTATGGAAGGTG	200 picomole Ultramer DNA Plate Oligo	Standard Desalting	Quantity Only	0.2
Plate 12	E06	59145_0606	TCGCTTTTGATTGCGGAGACCCCTTCAGCTTCCCGATATCCGACGGTAGTGTNNNNNNNNTCATGCCCGATTTTGATTTCATT	200 picomole Ultramer DNA Plate Oligo	Standard Desalting	Quantity Only	0.2
Plate 12	E07	59177_0607_SNP_a	GTCTTATTGATGATCCCAATCACTTTCCTTCAGCTTCCCGATATCCGACGGTAGTGTNNNNNNNNGCACTTATTACAGAAGAC	200 picomole Ultramer DNA Plate Oligo	Standard Desalting	Quantity Only	0.2
Plate 12	E08	59631_0608	GTGAGTTGCACCTTTTTGGAGTCAACAATCTTCAGCTTCCCGATATCCGACGGTAGTGTNNNNNNNNAGAAATAAAACAACAC	200 picomole Ultramer DNA Plate Oligo	Standard Desalting	Quantity Only	0.2
Plate 12	E09	59634_0609	CAAGAAACCAAGGGGTCGTTTTTGTGGGCTTCAGCTTCCCGATATCCGACGGTAGTGTNNNNNNNNAAATCCTACCAAACCC	200 picomole Ultramer DNA Plate Oligo	Standard Desalting	Quantity Only	0.2
Plate 12	E10	59635_0610_SNP_a	GATTTATAGGCCATTGTGCTGGTTGGAGCCTTCAGCTTCCCGATATCCGACGGTAGTGTNNNNNNNNCATGGATTCTGGAAAA	200 picomole Ultramer DNA Plate Oligo	Standard Desalting	Quantity Only	0.2
Plate 12	E11	59641_0131	CCACAAGCAATCAAATCCGCTTCAGCTTCCCGATATCCGACGGTAGTGTNNNNNNNNTTTTTTTGTCATCGTCTATTTCATC	200 picomole Ultramer DNA Plate Oligo	Standard Desalting	Quantity Only	0.2
Plate 12	E12	59643_0611	GCAAGTATGCAATTTTTCCGTGGACATTGCTTCAGCTTCCCGATATCCGACGGTAGTGTNNNNNNNNTGGGATTTGGTGATTG	200 picomole Ultramer DNA Plate Oligo	Standard Desalting	Quantity Only	0.2
Plate 12	F01	59747_0612_SNP_a	ATCGTGATCGTTCTTTTGAGGGTCATCGGCTTCAGCTTCCCGATATCCGACGGTAGTGTNNNNNNNNGATGGGCAAGGAAGAG	200 picomole Ultramer DNA Plate Oligo	Standard Desalting	Quantity Only	0.2
Plate 12	F02	59761_0132	CGGGTCACAATTAGAGCACTCCTTCAGCTTCCCGATATCCGACGGTAGTGTNNNNNNNNGTGTAGTACCTTTCCATTGAGG	200 picomole Ultramer DNA Plate Oligo	Standard Desalting	Quantity Only	0.2
Plate 12	F03	59843_0613	CCCTAATTTGATGCTGGTGGTGAAGCTTCAGCTTCCCGATATCCGACGGTAGTGTNNNNNNNNAGAGCAGTCAACTTCCAAAA	200 picomole Ultramer DNA Plate Oligo	Standard Desalting	Quantity Only	0.2
Plate 12	F04	59950_0614	TCCGCGTCTTGACGGCGTAACCGAGAATCCTTCAGCTTCCCGATATCCGACGGTAGTGTNNNNNNNNTTCGGCTCTCAAACGA	200 picomole Ultramer DNA Plate Oligo	Standard Desalting	Quantity Only	0.2
Plate 12	F05	60172_0615	TCAAGCAAATCTAGGATCTCTCTCTCAGCCTTCAGCTTCCCGATATCCGACGGTAGTGTNNNNNNNNGTGTTTTTGTCTGCAG	200 picomole Ultramer DNA Plate Oligo	Standard Desalting	Quantity Only	0.2
Plate 12	F06	60243_0616_SNP_a	GCGGCTGGTTTCTTCTCCGCGGGCTTCTTCAGCTTCCCGATATCCGACGGTAGTGTNNNNNNNNGATGTAGATCTTGTAAGT	200 picomole Ultramer DNA Plate Oligo	Standard Desalting	Quantity Only	0.2
Plate 12	F07	60248_0133	GCTCTAGTTTAGTCGAACATGTGGCCTTCAGCTTCCCGATATCCGACGGTAGTGTNNNNNNNNGGAAAGTTGTTCTCTAAGAC	200 picomole Ultramer DNA Plate Oligo	Standard Desalting	Quantity Only	0.2
Plate 12	F08	60270_0617	GCAAAGCTATGGGGATTATGAACAGTTTCCTTCAGCTTCCCGATATCCGACGGTAGTGTNNNNNNNNGAGAAGAAACCAAAAG	200 picomole Ultramer DNA Plate Oligo	Standard Desalting	Quantity Only	0.2
Plate 12	F09	60374_0620	CATAAACTTTCACTTACAGGCATCACGGCTTCAGCTTCCCGATATCCGACGGTAGTGTNNNNNNNNGAATATTACCCGTTCGT	200 picomole Ultramer DNA Plate Oligo	Standard Desalting	Quantity Only	0.2
Plate 12	F10	60513_0621	CGGGTTGAGATTTTACTATTTGCTTCAGCTTCCCGATATCCGACGGTAGTGTNNNNNNNNCTGGAAATGTATTTGATGTGTT	200 picomole Ultramer DNA Plate Oligo	Standard Desalting	Quantity Only	0.2
Plate 12	F11	60565_0622	GCTGGTGAAAGGATCTGAAGTTGATGAGACTTCAGCTTCCCGATATCCGACGGTAGTGTNNNNNNNNCCCAAACGCTGATGAA	200 picomole Ultramer DNA Plate Oligo	Standard Desalting	Quantity Only	0.2
Plate 12	F12	60596_0623	TTTTCAGTGTATGAATCAAAGAAGGCACCCTTCAGCTTCCCGATATCCGACGGTAGTGTNNNNNNNNAAGACCGTAAAGTCAG	200 picomole Ultramer DNA Plate Oligo	Standard Desalting	Quantity Only	0.2
Plate 12	G01	60604_0624	GGAGAAAAGAAGAACCAGAGATTGCCAACTTCAGCTTCCCGATATCCGACGGTAGTGTNNNNNNNNATAACAGCAGAAATCG	200 picomole Ultramer DNA Plate Oligo	Standard Desalting	Quantity Only	0.2
Plate 12	G02	60664_0625_SNP_a	CGCGTGCTATTTTAGAGAAGAGATTGGTTCTTCAGCTTCCCGATATCCGACGGTAGTGTNNNNNNNNTCGAATTCAGAGGCTT	200 picomole Ultramer DNA Plate Oligo	Standard Desalting	Quantity Only	0.2
Plate 12	G03	60719_0626	ACGTTTAGAGTCACACCTGCCTCTTCAGCTTCCCGATATCCGACGGTAGTGTNNNNNNNNGTTTTTCTTTGTCGTCCTGTAGT	200 picomole Ultramer DNA Plate Oligo	Standard Desalting	Quantity Only	0.2
Plate 12	G04	60847_0627	GTGTTAGTTTGGGAGATGGGGCTTCAGCTTCCCGATATCCGACGGTAGTGTNNNNNNNNCGTATATATTTATAGAAATGATGA	200 picomole Ultramer DNA Plate Oligo	Standard Desalting	Quantity Only	0.2
Plate 12	G05	60862_0628	CAACTACCTACACGAAGGTGTGTAAGATACTTCAGCTTCCCGATATCCGACGGTAGTGTNNNNNNNNGAATTGAATATGCAGG	200 picomole Ultramer DNA Plate Oligo	Standard Desalting	Quantity Only	0.2
Plate 12	G06	60929_0630	CAAGATCGGGAATAGAAAAATTAGTTGGGCTTCAGCTTCCCGATATCCGACGGTAGTGTNNNNNNNNGAGGTCTTTGGTGTGT	200 picomole Ultramer DNA Plate Oligo	Standard Desalting	Quantity Only	0.2
Plate 12	G07	60930_0631	GTTAAAAGTAACAATAATGAAGAGTGGGGCTTCAGCTTCCCGATATCCGACGGTAGTGTNNNNNNNNTGGAGAGAGAGCTTGT	200 picomole Ultramer DNA Plate Oligo	Standard Desalting	Quantity Only	0.2
Plate 12	G08	60946_0632	GTGGAAGCGGCGGAGCGGAAATGAGAACTTCAGCTTCCCGATATCCGACGGTAGTGTNNNNNNNNGTCGTTGGTGTGAAGT	200 picomole Ultramer DNA Plate Oligo	Standard Desalting	Quantity Only	0.2
Plate 12	G09	61001_0633	GCGACGGAAAGTTCTTGTGATTGCTTCAGCTTCCCGATATCCGACGGTAGTGTNNNNNNNNGGCATTTGCAATTTTGCATTAC	200 picomole Ultramer DNA Plate Oligo	Standard Desalting	Quantity Only	0.2
Plate 12	G10	61022_0634	AGAGTTAGATACTTACCCGCATGTAGGACCTTCAGCTTCCCGATATCCGACGGTAGTGTNNNNNNNNCTCCAAATGTGCCTGG	200 picomole Ultramer DNA Plate Oligo	Standard Desalting	Quantity Only	0.2
Plate 12	G11	61028_0635	GCTTCGGAGATCCGTTTGAATTTGGCTTCTTCAGCTTCCCGATATCCGACGGTAGTGTNNNNNNNNGCTGATGAAAGTGAGG	200 picomole Ultramer DNA Plate Oligo	Standard Desalting	Quantity Only	0.2
Plate 12	G12	61038_0636	GGTTTGACGCGGTTTATTTGGAAATCTTCAGCTTCCCGATATCCGACGGTAGTGTNNNNNNNNGTTCAGTTGGGTTGTC	200 picomole Ultramer DNA Plate Oligo	Standard Desalting	Quantity Only	0.2
Plate 12	H01	61073_0637	GCCTGCGAGAACCTTGCTTCTTCAGCTTCCCGATATCCGACGGTAGTGTNNNNNNNNGGCAACTGAGAACTATGTTCTATGTT	200 picomole Ultramer DNA Plate Oligo	Standard Desalting	Quantity Only	0.2
Plate 12	H02	61173_0638_SNP_a	GAGAACGTATGGAAGCTCTATGAGAGGTGCTTCAGCTTCCCGATATCCGACGGTAGTGTNNNNNNNNAAAAGGCATAAACAGA	200 picomole Ultramer DNA Plate Oligo	Standard Desalting	Quantity Only	0.2
Plate 12	H03	61190_0639	GCCATTCTCCATTGAGCTCTCTGCTTCAGCTTCCCGATATCCGACGGTAGTGTNNNNNNNNTGGATATTCTTCCGCTTTGCTG	200 picomole Ultramer DNA Plate Oligo	Standard Desalting	Quantity Only	0.2
Plate 12	H04	61193_0640	GTTGGAGCGAGAACGAGAGTGAGAATGTGCTTCAGCTTCCCGATATCCGACGGTAGTGTNNNNNNNNGTGGGTTTGAATGAAG	200 picomole Ultramer DNA Plate Oligo	Standard Desalting	Quantity Only	0.2
Plate 12	H05	61225_0641	GTTGGATTACGAAAATGCCCTCGGGATTCTTCAGCTTCCCGATATCCGACGGTAGTGTNNNNNNNNGAGAAGGAGATCGAAG	200 picomole Ultramer DNA Plate Oligo	Standard Desalting	Quantity Only	0.2
Plate 12	H06	61303_0642	GCTGCAAATCTAACATCGGAAGAAACCCACTTCAGCTTCCCGATATCCGACGGTAGTGTNNNNNNNNGAAAAACAAAAACCAA	200 picomole Ultramer DNA Plate Oligo	Standard Desalting	Quantity Only	0.2
Plate 12	H07	61318_0643	GTGGTGATGATAACCATGAAGGAGTGCTTCAGCTTCCCGATATCCGACGGTAGTGTNNNNNNNNGGATTATCTATTTGCAAGC	200 picomole Ultramer DNA Plate Oligo	Standard Desalting	Quantity Only	0.2
Plate 12	H08	61394_0134	CCAAGTCTCCTTGCCTTCCTTCAGCTTCCCGATATCCGACGGTAGTGTNNNNNNNNTGTCTATCTTTTTTTGTACTTCTTATT	200 picomole Ultramer DNA Plate Oligo	Standard Desalting	Quantity Only	0.2
Plate 12	H09	61522_0644	GTTATGTGATCAAGAGGAACGTCGTACCTTCAGCTTCCCGATATCCGACGGTAGTGTNNNNNNNNGGGGAAGGATATGTGG	200 picomole Ultramer DNA Plate Oligo	Standard Desalting	Quantity Only	0.2
Plate 12	H10	61527_0096	GCTACCTCTTTTTTGAAGGCCAGGCTTCAGCTTCCCGATATCCGACGGTAGTGTNNNNNNNNTAGAGGCTAACCAAAG	200 picomole Ultramer DNA Plate Oligo	Standard Desalting	Quantity Only	0.2
Plate 12	H11	61535_0646	GGGTGAGAGTAAGTGAGGAAGATGAAGCTTCAGCTTCCCGATATCCGACGGTAGTGTNNNNNNNNAGAGAAGAGCGTGGAG	200 picomole Ultramer DNA Plate Oligo	Standard Desalting	Quantity Only	0.2
Plate 12	H12	61545_0647	CCACTCATCAGCTAGACGTTTCTACATTCCTTCAGCTTCCCGATATCCGACGGTAGTGTNNNNNNNNATTGACCGTTAAGTGG	200 picomole Ultramer DNA Plate Oligo	Standard Desalting	Quantity Only	0.2
Plate 13	A01	61546_0648	CGTTCATCAGGTACACGGTCGGTCCCTTCAGCTTCCCGATATCCGACGGTAGTGTNNNNNNNNAAGAAAATGTAACAACCA	200 picomole Ultramer DNA Plate Oligo	Standard Desalting	Quantity Only	0.2
Plate 13	A02	61604_0649	GTTTTCGTCGTTTACAGGCTTCAGCTTCCCGATATCCGACGGTAGTGTNNNNNNNNGAGAAAAAGACAAAGCTTTTCAAAG	200 picomole Ultramer DNA Plate Oligo	Standard Desalting	Quantity Only	0.2
Plate 13	A03	61657_0650	ACCGCTTCTTCCACGCAAGCGGTTTTGCTTCAGCTTCCCGATATCCGACGGTAGTGTNNNNNNNNTCTTTTGTTTGTTTGTT	200 picomole Ultramer DNA Plate Oligo	Standard Desalting	Quantity Only	0.2
Plate 13	A04	61673_0651	CTTGTTTCTCGGCGGTGGCTAGTTTAAGCTTCAGCTTCCCGATATCCGACGGTAGTGTNNNNNNNNCACGCAAATCTCGACTC	200 picomole Ultramer DNA Plate Oligo	Standard Desalting	Quantity Only	0.2
Plate 13	A05	61747_0097	GAAGCATGTCTTTTGCTTTGGCTCAGCCCTTCAGCTTCCCGATATCCGACGGTAGTGTNNNNNNNNACACAACTTGATTGTTC	200 picomole Ultramer DNA Plate Oligo	Standard Desalting	Quantity Only	0.2
Plate 13	A06	61760_0653	CGGCTCAAGGGAGGATTAGTCCTTCAGCTTCCCGATATCCGACGGTAGTGTNNNNNNNNGGTGGATTGTGTATAGTGGGAG	200 picomole Ultramer DNA Plate Oligo	Standard Desalting	Quantity Only	0.2
Plate 13	A07	61812_0654_SNP_a	GTGGAACATTTTGTTGTTCTATGTTGTTCTTCAGCTTCCCGATATCCGACGGTAGTGTNNNNNNNNATTGGGGAATGTTGCT	200 picomole Ultramer DNA Plate Oligo	Standard Desalting	Quantity Only	0.2
Plate 13	A08	61850_0655	GACCTAAAGATCAGAACTTATTTGTTTAGCTTCAGCTTCCCGATATCCGACGGTAGTGTNNNNNNNNTAGATATGGTTGGTGT	200 picomole Ultramer DNA Plate Oligo	Standard Desalting	Quantity Only	0.2
Plate 13	A09	61914_0656_SNP_a	AAAAAAAAAAAAAAAGGCCAACGTTCAGCTTCAGCTTCCCGATATCCGACGGTAGTGTNNNNNNNNCAAAAATAAAACAAAAA	200 picomole Ultramer DNA Plate Oligo	Standard Desalting	Quantity Only	0.2
Plate 13	A10	61972_0657	GCTTCTTCTTATCTTCTCCGCCGTCGCTTCAGCTTCCCGATATCCGACGGTAGTGTNNNNNNNNAAAGAAGAAGAAAAAAAAA	200 picomole Ultramer DNA Plate Oligo	Standard Desalting	Quantity Only	0.2
Plate 13	A11	62040_0658	GTTGATTACGGAAATTAGTCGGATACTAGCTTCAGCTTCCCGATATCCGACGGTAGTGTNNNNNNNNAACAGAGAAAAAATGC	200 picomole Ultramer DNA Plate Oligo	Standard Desalting	Quantity Only	0.2
Plate 13	A12	62068_0659	GAGAGTATGTGTGGAATGCAGAGAACTCTTCAGCTTCCCGATATCCGACGGTAGTGTNNNNNNNNGGTAACAGGAGGGTAC	200 picomole Ultramer DNA Plate Oligo	Standard Desalting	Quantity Only	0.2
Plate 13	B01	62074_0660_SNP_a	GTAGGTTCGATTAATCCGCCATTATTGCGCTTCAGCTTCCCGATATCCGACGGTAGTGTNNNNNNNNAAGAAGAAGAGACAGT	200 picomole Ultramer DNA Plate Oligo	Standard Desalting	Quantity Only	0.2
Plate 13	B02	62092_0661	TTCATCGATCAAGAGCACTTCTCCGGGCTTCAGCTTCCCGATATCCGACGGTAGTGTNNNNNNNNCGGTTATCTGTGTCGGTT	200 picomole Ultramer DNA Plate Oligo	Standard Desalting	Quantity Only	0.2
Plate 13	B03	62097_0662	CTCTGGTGTTTTGGCAGTGTCAGCTCTTGCTTCAGCTTCCCGATATCCGACGGTAGTGTNNNNNNNNGTTTGCGTTGTATCAT	200 picomole Ultramer DNA Plate Oligo	Standard Desalting	Quantity Only	0.2
Plate 13	B04	62206_0663	CAGATTATACTGCTATACTGGTGGTTTCCTTCAGCTTCCCGATATCCGACGGTAGTGTNNNNNNNNAACCAAGCCAACAATC	200 picomole Ultramer DNA Plate Oligo	Standard Desalting	Quantity Only	0.2
Plate 13	B05	62212_0664	GACGTCAGCAAAATGGGGACACGTGACTTCAGCTTCCCGATATCCGACGGTAGTGTNNNNNNNNGAATAAACGAGTGTAG	200 picomole Ultramer DNA Plate Oligo	Standard Desalting	Quantity Only	0.2
Plate 13	B06	62229_0665	GCCTCCGATCAAAGCCAATCTTCAGCTTCCCGATATCCGACGGTAGTGTNNNNNNNNTGTTGTTGATTTGTGTGGTTCTTTG	200 picomole Ultramer DNA Plate Oligo	Standard Desalting	Quantity Only	0.2
Plate 13	B07	62492_0666	TTCGCTTCCTTCCTCTAATTTCCGATTCCCTTCAGCTTCCCGATATCCGACGGTAGTGTNNNNNNNNTTAAAAGCTGACGTCA	200 picomole Ultramer DNA Plate Oligo	Standard Desalting	Quantity Only	0.2
Plate 13	B08	62577_0667	GCCTCGCTATGATGATCGCTATGGAACTTCAGCTTCCCGATATCCGACGGTAGTGTNNNNNNNNGGTCTGAGGTAGTGTT	200 picomole Ultramer DNA Plate Oligo	Standard Desalting	Quantity Only	0.2
Plate 13	B09	62598_0668_SNP_a	CGTAGCATCTAATGTACTGCATGAGCCTTCAGCTTCCCGATATCCGACGGTAGTGTNNNNNNNNACGCAAAGGTTAGGCAAA	200 picomole Ultramer DNA Plate Oligo	Standard Desalting	Quantity Only	0.2
Plate 13	B10	62651_0669	CGATCGGAGATGATGATGATTTGTCTTCAGCTTCCCGATATCCGACGGTAGTGTNNNNNNNNGGATTGAATTTGGGAGGCGG	200 picomole Ultramer DNA Plate Oligo	Standard Desalting	Quantity Only	0.2
Plate 13	B11	62656_0670	GTTTTGTAATCAGAGGCAGAGCCTTGCAGCTTCAGCTTCCCGATATCCGACGGTAGTGTNNNNNNNNTCGGAAAAGTACGACG	200 picomole Ultramer DNA Plate Oligo	Standard Desalting	Quantity Only	0.2
Plate 13	B12	62671_0671	GGTTTCGTTCTTCACGCGCTTACAGTTAGCTTCAGCTTCCCGATATCCGACGGTAGTGTNNNNNNNNGTGAAATCTCAGGGAC	200 picomole Ultramer DNA Plate Oligo	Standard Desalting	Quantity Only	0.2
Plate 13	C01	62725_0672	GAGGAGGAGGTTGACCACCGTTGAAATCGCTTCAGCTTCCCGATATCCGACGGTAGTGTNNNNNNNNGGAGGACGAGAGGAGT	200 picomole Ultramer DNA Plate Oligo	Standard Desalting	Quantity Only	0.2
Plate 13	C02	62813_0673	TTGACCGAATCCTTCTGGCCTGTTCCCTTCAGCTTCCCGATATCCGACGGTAGTGTNNNNNNNNGAAACGTGTCAAGTATCCT	200 picomole Ultramer DNA Plate Oligo	Standard Desalting	Quantity Only	0.2
Plate 13	C03	62875_0674	GGATGTGCTTCTTCTCTTCCAGCTTCAGCTTCCCGATATCCGACGGTAGTGTNNNNNNNNGTTTTTATTTTTATTTGACGATC	200 picomole Ultramer DNA Plate Oligo	Standard Desalting	Quantity Only	0.2
Plate 13	C04	62901_0676	GATTCTTCTGTGAGAGAAAACGAGCTTCAGCTTCCCGATATCCGACGGTAGTGTNNNNNNNNCGGTGTTGGTGGAGGT	200 picomole Ultramer DNA Plate Oligo	Standard Desalting	Quantity Only	0.2
Plate 13	C05	62916_0677	CGAGACCACGGAATTTGATAGCAGCCTTCAGCTTCCCGATATCCGACGGTAGTGTNNNNNNNNCCACATGTATTATTTCGAAC	200 picomole Ultramer DNA Plate Oligo	Standard Desalting	Quantity Only	0.2
Plate 13	C06	62919_0678	GCGATGAAAGCATCTCTCGCTGCAGAGTCCTTCAGCTTCCCGATATCCGACGGTAGTGTNNNNNNNNAGAAGAAAGATTCAAC	200 picomole Ultramer DNA Plate Oligo	Standard Desalting	Quantity Only	0.2
Plate 13	C07	62930_0679	GGTCGACAATCTCGCCCTTTCCATGTGCTTCAGCTTCCCGATATCCGACGGTAGTGTNNNNNNNNGTTAAAAAGATAGGAGTA	200 picomole Ultramer DNA Plate Oligo	Standard Desalting	Quantity Only	0.2
Plate 13	C08	63029_0680	ACTTCTACCTCGACCACCGTATCCTCTCCCTTCAGCTTCCCGATATCCGACGGTAGTGTNNNNNNNNAAAACAAAATCAAAAC	200 picomole Ultramer DNA Plate Oligo	Standard Desalting	Quantity Only	0.2
Plate 13	C09	63034_0681	TCGTTCACATAATGATTTTTTACTATTCTCTTCAGCTTCCCGATATCCGACGGTAGTGTNNNNNNNNTGGGGTTTGTGTTGTT	200 picomole Ultramer DNA Plate Oligo	Standard Desalting	Quantity Only	0.2
Plate 13	C10	63047_0137	CCAAAGCTCATTAACACTCACTGTGGCCACTTCAGCTTCCCGATATCCGACGGTAGTGTNNNNNNNNGGGTGAAGAAAGTAGG	200 picomole Ultramer DNA Plate Oligo	Standard Desalting	Quantity Only	0.2
Plate 13	C11	63055_0682	CGTCACGTGTTATTGTTCTCTAGGGACCGCTTCAGCTTCCCGATATCCGACGGTAGTGTNNNNNNNNAAACGGAAGAAGCAAA	200 picomole Ultramer DNA Plate Oligo	Standard Desalting	Quantity Only	0.2
Plate 13	C12	63079_0683	TTTGGGCCCTAATTTAAAGGAGGCTCCCTTCAGCTTCCCGATATCCGACGGTAGTGTNNNNNNNNTACTTGAGATGGGGTG	200 picomole Ultramer DNA Plate Oligo	Standard Desalting	Quantity Only	0.2
Plate 13	D01	63083_0684	GCAAGTCAAGGTGGACATGTGAAGTATCTTCAGCTTCCCGATATCCGACGGTAGTGTNNNNNNNNGGTGTTTAGGAGCTCT	200 picomole Ultramer DNA Plate Oligo	Standard Desalting	Quantity Only	0.2
Plate 13	D02	63088_0685	CAACGTTCTCTAATGTTCCTCCCCTTCAGCTTCCCGATATCCGACGGTAGTGTNNNNNNNNTGCTTGGTTCTTAACTCCTTG	200 picomole Ultramer DNA Plate Oligo	Standard Desalting	Quantity Only	0.2
Plate 13	D03	63169_0686	GCAAAACTCAAGTGGGACCCACAGAATAGCTTCAGCTTCCCGATATCCGACGGTAGTGTNNNNNNNNGACGAAGATGATGATC	200 picomole Ultramer DNA Plate Oligo	Standard Desalting	Quantity Only	0.2
Plate 13	D04	63210	AGAGAGAGAGAGAGAGAGAGAGAGGTGTCTTCAGCTTCCCGATATCCGACGGTAGTGTNNNNNNNNGAAAAAAGGTGAGATT	200 picomole Ultramer DNA Plate Oligo	Standard Desalting	Quantity Only	0.2
Plate 13	D05	63320_0687	GCCGGAAATTGGGAGATCCAACTGCGACTTCAGCTTCCCGATATCCGACGGTAGTGTNNNNNNNNGATGATCTAAACGGCG	200 picomole Ultramer DNA Plate Oligo	Standard Desalting	Quantity Only	0.2
Plate 13	D06	63327_0138	CAGTAGTTTCGGGTTTAGTCTTCTTGCCCTTCAGCTTCCCGATATCCGACGGTAGTGTNNNNNNNNTACAATCCAACCAACA	200 picomole Ultramer DNA Plate Oligo	Standard Desalting	Quantity Only	0.2
Plate 13	D07	63343_0688	CCGGTCTAAAAATGATTATGGTGAAGGACTTCAGCTTCCCGATATCCGACGGTAGTGTNNNNNNNNGCCTGAGCAGTCTTTTG	200 picomole Ultramer DNA Plate Oligo	Standard Desalting	Quantity Only	0.2
Plate 13	D08	63374_0689	TCACGTGAGGTTCATCTCCGGCGGCTCTTCAGCTTCCCGATATCCGACGGTAGTGTNNNNNNNNGAAGTGGGTTTGGTCCTTT	200 picomole Ultramer DNA Plate Oligo	Standard Desalting	Quantity Only	0.2
Plate 13	D09	63490_0690_SNP_a	GTCGTTGTTGTTGTGGTGGTCGGGGAACTTCAGCTTCCCGATATCCGACGGTAGTGTNNNNNNNNGAAGGTGGAGAGAGTG	200 picomole Ultramer DNA Plate Oligo	Standard Desalting	Quantity Only	0.2
Plate 13	D10	63563_0691	GCTAATTAAGTTGCGTCTGCTGGTCTTCAGCTTCCCGATATCCGACGGTAGTGTNNNNNNNNGCATGCATTGACATATC	200 picomole Ultramer DNA Plate Oligo	Standard Desalting	Quantity Only	0.2
Plate 13	D11	63623_0692	GCGATACTTCGAGTGTGATCCGTCTTCAGCTTCCCGATATCCGACGGTAGTGTNNNNNNNNCTTTCTTCAGCTCCTCAGCTAC	200 picomole Ultramer DNA Plate Oligo	Standard Desalting	Quantity Only	0.2
Plate 13	D12	63630_0693	CAGGAGTGAGCGACACAGAACCAAACTTCAGCTTCCCGATATCCGACGGTAGTGTNNNNNNNNGTTGGGTGGATCCCGAGG	200 picomole Ultramer DNA Plate Oligo	Standard Desalting	Quantity Only	0.2
Plate 13	E01	63634_0694	GCTTTTATCATTGCTTGGTTTCTTTATATCTTCAGCTTCCCGATATCCGACGGTAGTGTNNNNNNNNAAGGTGGTGGTGGTGG	200 picomole Ultramer DNA Plate Oligo	Standard Desalting	Quantity Only	0.2
Plate 13	E02	63644_0695	GGAGGTAAATATTAGAGGGAGCGGCTTCAGCTTCCCGATATCCGACGGTAGTGTNNNNNNNNAAAGGAAGAAAAGCCG	200 picomole Ultramer DNA Plate Oligo	Standard Desalting	Quantity Only	0.2
Plate 13	E03	63650_0696	CAGGAGCTTCTTGTTCCGTGACGATTTTCTTCAGCTTCCCGATATCCGACGGTAGTGTNNNNNNNNTTATGTGCGTTCATTG	200 picomole Ultramer DNA Plate Oligo	Standard Desalting	Quantity Only	0.2
Plate 13	E04	63764_0697	GCTTTTGTCTCTCTTTTTACTGAGAAATGCTTCAGCTTCCCGATATCCGACGGTAGTGTNNNNNNNNCAAATGCCAGATAGAT	200 picomole Ultramer DNA Plate Oligo	Standard Desalting	Quantity Only	0.2
Plate 13	E05	63820_0140_SNP_a	GTGGTGGTACTGGTACCATGATGATCTCTTCAGCTTCCCGATATCCGACGGTAGTGTNNNNNNNNTCTTACTTCCACACACAT	200 picomole Ultramer DNA Plate Oligo	Standard Desalting	Quantity Only	0.2
Plate 13	E06	63827_0698	CAAAACTGAACAATTTCTGAAAAGACTGGCTTCAGCTTCCCGATATCCGACGGTAGTGTNNNNNNNNGTCATAATGATGAGGG	200 picomole Ultramer DNA Plate Oligo	Standard Desalting	Quantity Only	0.2
Plate 13	E07	63877_0141	GTTCTAGCAAAGCTTGAGAAGGAAGGTGCTTCAGCTTCCCGATATCCGACGGTAGTGTNNNNNNNNACCCAAATACAAAGCAC	200 picomole Ultramer DNA Plate Oligo	Standard Desalting	Quantity Only	0.2
Plate 13	E08	63885_0699	CTGCTGGAAAAGGAAATTGGATCGCGGCTTCAGCTTCCCGATATCCGACGGTAGTGTNNNNNNNNACAATCCAAAGCAGAAG	200 picomole Ultramer DNA Plate Oligo	Standard Desalting	Quantity Only	0.2
Plate 13	E09	63903_0700	GCCATTTCGAAGGAAAATATAGTGCTTCAGCTTCCCGATATCCGACGGTAGTGTNNNNNNNNGCCGTTTAAACGGCGAATAGT	200 picomole Ultramer DNA Plate Oligo	Standard Desalting	Quantity Only	0.2
Plate 13	E10	63915_0701	GAATGTACCAAGGGGTTTCAACTCTTCAACTTCAGCTTCCCGATATCCGACGGTAGTGTNNNNNNNNTTTGATCTTCTACACC	200 picomole Ultramer DNA Plate Oligo	Standard Desalting	Quantity Only	0.2
Plate 13	E11	63967_0098	GCCGTAACTGAGTTTGTGTTTGCTTCAGCTTCCCGATATCCGACGGTAGTGTNNNNNNNNTTCTCTTCTTTTACTTTAGACCG	200 picomole Ultramer DNA Plate Oligo	Standard Desalting	Quantity Only	0.2
Plate 13	E12	64002_0703	CAGAGGAAGATGTGGCGGCCATGGATGTCTTCAGCTTCCCGATATCCGACGGTAGTGTNNNNNNNNCGAACCATCAGCAAAA	200 picomole Ultramer DNA Plate Oligo	Standard Desalting	Quantity Only	0.2
Plate 13	F01	64041_0704	CGAGGATGCATGATGATCTCTGCCTTCAGCTTCCCGATATCCGACGGTAGTGTNNNNNNNNTTCTTCTAATTCTCCTTGACGG	200 picomole Ultramer DNA Plate Oligo	Standard Desalting	Quantity Only	0.2
Plate 13	F02	64076_0705	GCGATGTCTTCATGCCGCTCAACCTTCAGCTTCCCGATATCCGACGGTAGTGTNNNNNNNNCGCGGTGTTTTGTAAGTTGG	200 picomole Ultramer DNA Plate Oligo	Standard Desalting	Quantity Only	0.2
Plate 13	F03	64153_0706	CCGATCTTCTTCCGCCGCCCTTCAGCTTCCCGATATCCGACGGTAGTGTNNNNNNNNCGTTTCACTCCATTACAGAGTTGTAG	200 picomole Ultramer DNA Plate Oligo	Standard Desalting	Quantity Only	0.2
Plate 13	F04	64163_0707	GCGGCGGTTGATCCCATTGAGATATTCTTCAGCTTCCCGATATCCGACGGTAGTGTNNNNNNNNTTTACCTAGAGTGTCACCG	200 picomole Ultramer DNA Plate Oligo	Standard Desalting	Quantity Only	0.2
Plate 13	F05	64204_0708	ACACCGAAGGCTTTGAGCGGCATTAATCTTCAGCTTCCCGATATCCGACGGTAGTGTNNNNNNNNTCAATCTCTCTCTCTCTC	200 picomole Ultramer DNA Plate Oligo	Standard Desalting	Quantity Only	0.2
Plate 13	F06	64223_0709	GTCGTTTGTGCATTGTGGTCTTGCTTCAGCTTCCCGATATCCGACGGTAGTGTNNNNNNNNTCAGATCGAGAAGGCATTGCG	200 picomole Ultramer DNA Plate Oligo	Standard Desalting	Quantity Only	0.2
Plate 13	F07	64230_0710	GACTTGTTGAGAGATAACGGTGGTTGTCTCTTCAGCTTCCCGATATCCGACGGTAGTGTNNNNNNNNTACGTGGGAGTCACTG	200 picomole Ultramer DNA Plate Oligo	Standard Desalting	Quantity Only	0.2
Plate 13	F08	64250_0711	GATTGCGTATTTTGAGCGATGCGGGCTTCAGCTTCCCGATATCCGACGGTAGTGTNNNNNNNNAGCAAAGCACCATTAAA	200 picomole Ultramer DNA Plate Oligo	Standard Desalting	Quantity Only	0.2
Plate 13	F09	64265_0712	GGTGTGTGATGATGGTGGTGAAGAAATGCTTCAGCTTCCCGATATCCGACGGTAGTGTNNNNNNNNTTGAGTCCAGAGAAAG	200 picomole Ultramer DNA Plate Oligo	Standard Desalting	Quantity Only	0.2
Plate 13	F10	64270_0713	CGATCGGATAAGCATGCTTCCGGATGCTTCAGCTTCCCGATATCCGACGGTAGTGTNNNNNNNNCAATATCAATGACGACACA	200 picomole Ultramer DNA Plate Oligo	Standard Desalting	Quantity Only	0.2
Plate 13	F11	64283_0714	GTGGAGGATCTTGCATCTGTGTCATGGCTTCAGCTTCCCGATATCCGACGGTAGTGTNNNNNNNNCGATGTAGAAGTTGAG	200 picomole Ultramer DNA Plate Oligo	Standard Desalting	Quantity Only	0.2
Plate 13	F12	64287_0715	GTTACTGGTATTGGATTTGGTTTCGACAGCTTCAGCTTCCCGATATCCGACGGTAGTGTNNNNNNNNAGGGTTTTGAAAGATG	200 picomole Ultramer DNA Plate Oligo	Standard Desalting	Quantity Only	0.2
Plate 13	G01	64366_0716	CCAGTTTACGATCAGAGACACATCATTAGCTTCAGCTTCCCGATATCCGACGGTAGTGTNNNNNNNNACAACTCATAAAACCA	200 picomole Ultramer DNA Plate Oligo	Standard Desalting	Quantity Only	0.2
Plate 13	G02	64368_0717	CTTGAATAATTCAAAAGATTGATAGCAGACTTCAGCTTCCCGATATCCGACGGTAGTGTNNNNNNNNCGAAGAATTAAAAAGG	200 picomole Ultramer DNA Plate Oligo	Standard Desalting	Quantity Only	0.2
Plate 13	G03	64385_0718	GCAAGGAAATGTGCAGAGACAACTTTCTTCAGCTTCCCGATATCCGACGGTAGTGTNNNNNNNNGACATTGTGTAAGTTTAG	200 picomole Ultramer DNA Plate Oligo	Standard Desalting	Quantity Only	0.2
Plate 13	G04	64479_0720	GCCCGACCGGTTTATGTTGATCGGATTTTCTTCAGCTTCCCGATATCCGACGGTAGTGTNNNNNNNNCTCTCTACAATGGATC	200 picomole Ultramer DNA Plate Oligo	Standard Desalting	Quantity Only	0.2
Plate 13	G05	64497_0721	TTCAAAAATCCGATTCCAGATCCATTCCCTTCAGCTTCCCGATATCCGACGGTAGTGTNNNNNNNNTGACGTCGGCACGCTTT	200 picomole Ultramer DNA Plate Oligo	Standard Desalting	Quantity Only	0.2
Plate 13	G06	64519_0722	CCAATCGAATCTCACCTTCCCGCGCTTCAGCTTCCCGATATCCGACGGTAGTGTNNNNNNNNAGAAGAACAAAGAACAAAAA	200 picomole Ultramer DNA Plate Oligo	Standard Desalting	Quantity Only	0.2
Plate 13	G07	64541_0723	TTCTTAGCTCGGAATGTTCTCCCGCTTCAGCTTCCCGATATCCGACGGTAGTGTNNNNNNNNATGACATGTTCAGTGACTGCT	200 picomole Ultramer DNA Plate Oligo	Standard Desalting	Quantity Only	0.2
Plate 13	G08	64568_0724	CAAGAGAGTAAGTAAGTGGAGAGAGAGCCCTTCAGCTTCCCGATATCCGACGGTAGTGTNNNNNNNNTCTCATGTGTTCGTCC	200 picomole Ultramer DNA Plate Oligo	Standard Desalting	Quantity Only	0.2
Plate 13	G09	64597_0725	ACCAACCGATTATTGTTGCAGGTTAAGCGCTTCAGCTTCCCGATATCCGACGGTAGTGTNNNNNNNNCAACAAGACAACAAAA	200 picomole Ultramer DNA Plate Oligo	Standard Desalting	Quantity Only	0.2
Plate 13	G10	64611_0726	GAGAGGAAGAAATCCAAGGGACCCCTTCAGCTTCCCGATATCCGACGGTAGTGTNNNNNNNNAAACTACGAAGGAAGCG	200 picomole Ultramer DNA Plate Oligo	Standard Desalting	Quantity Only	0.2
Plate 13	G11	64666_0727	CCTGGTGGATTGGTTCTATGGAGTTCTGGCTTCAGCTTCCCGATATCCGACGGTAGTGTNNNNNNNNAATAAAGGCCTCAAGG	200 picomole Ultramer DNA Plate Oligo	Standard Desalting	Quantity Only	0.2
Plate 13	G12	64669_0728	CTTCGACTTAAATTAGCTGGCACCATTCTTCAGCTTCCCGATATCCGACGGTAGTGTNNNNNNNNTCTTTGCTTCTTCTCCTC	200 picomole Ultramer DNA Plate Oligo	Standard Desalting	Quantity Only	0.2
Plate 13	H01	64671_0729	GTTTTTGTTTGAATTGGAATGGAGGGCTTCAGCTTCCCGATATCCGACGGTAGTGTNNNNNNNNGACGAGGAAGCTGAGA	200 picomole Ultramer DNA Plate Oligo	Standard Desalting	Quantity Only	0.2
Plate 13	H02	64679_0730	GAAAGCTTCAAGAAGACGAAAACGTGCCCTTCAGCTTCCCGATATCCGACGGTAGTGTNNNNNNNNGAAGCGTGGGAGAGAT	200 picomole Ultramer DNA Plate Oligo	Standard Desalting	Quantity Only	0.2
Plate 13	H03	64682_0731	GCCGAAGAGGTACTGGAGGAGGTGGCTTCAGCTTCCCGATATCCGACGGTAGTGTNNNNNNNNAGCTGCATAGACAGTG	200 picomole Ultramer DNA Plate Oligo	Standard Desalting	Quantity Only	0.2
Plate 13	H04	64686_0732	CCCCCTCCTAACCTGCGCCTCTTCAGCTTCCCGATATCCGACGGTAGTGTNNNNNNNNGTCTTTTCACCCATTTTTCTCTCTC	200 picomole Ultramer DNA Plate Oligo	Standard Desalting	Quantity Only	0.2
Plate 13	H05	64748_0733	GTCCTCCGTCGCCCTGACGGTTCTTTCCTTCAGCTTCCCGATATCCGACGGTAGTGTNNNNNNNNCCAAAAAAAAAAGAAGAA	200 picomole Ultramer DNA Plate Oligo	Standard Desalting	Quantity Only	0.2
Plate 13	H06	64802_0734_SNP_a	TTTTGTCCCTCTCTCTCTCTCCTTCAGCTTCCCGATATCCGACGGTAGTGTNNNNNNNNTCAGGTACGACACTGTGTACGTG	200 picomole Ultramer DNA Plate Oligo	Standard Desalting	Quantity Only	0.2
Plate 13	H07	64807_0735	GGAAGATCCTCAGCATCTCCCTCCTTCAGCTTCCCGATATCCGACGGTAGTGTNNNNNNNNGGGTCCGGCCAGTACTCAAT	200 picomole Ultramer DNA Plate Oligo	Standard Desalting	Quantity Only	0.2
Plate 13	H08	64810_0736	GGGTAGAGTACACACTCTGCTGATTCGTCCTTCAGCTTCCCGATATCCGACGGTAGTGTNNNNNNNNTGTCTGTGTTTGAGGC	200 picomole Ultramer DNA Plate Oligo	Standard Desalting	Quantity Only	0.2
Plate 13	H09	64889_0737	GAGGTATATTGGATGCGTGCCTTCAGCTTCCCGATATCCGACGGTAGTGTNNNNNNNNGGTTGGGGGAAGGAAGACGA	200 picomole Ultramer DNA Plate Oligo	Standard Desalting	Quantity Only	0.2
Plate 13	H10	64895_0738	CGTCACCGTCTTGAACAAACTACTCGGAGCTTCAGCTTCCCGATATCCGACGGTAGTGTNNNNNNNNATGAATGAAACCGATG	200 picomole Ultramer DNA Plate Oligo	Standard Desalting	Quantity Only	0.2
Plate 13	H11	64896_0739	GAAGAGACACTGTACCTAAACAAATTGGCTTCAGCTTCCCGATATCCGACGGTAGTGTNNNNNNNNGTGTTTAGTGTTGGGTG	200 picomole Ultramer DNA Plate Oligo	Standard Desalting	Quantity Only	0.2
Plate 13	H12	64903_0740	CGGCGGCTTCTGTTTTCTCTTCAGCTTCCCGATATCCGACGGTAGTGTNNNNNNNNCGTCTCTCATCTCATCAAGTTTTGTTG	200 picomole Ultramer DNA Plate Oligo	Standard Desalting	Quantity Only	0.2
Plate 14	A01	64938_0741_SNP_a	GGGATTGTATAGGGTTAATCTAAGGATGTCTTCAGCTTCCCGATATCCGACGGTAGTGTNNNNNNNNTCTGGAGACTAAGAAG	200 picomole Ultramer DNA Plate Oligo	Standard Desalting	Quantity Only	0.2
Plate 14	A02	64958_0742	GGAGATCGATAACAAATCATTCATTTCACTTCAGCTTCCCGATATCCGACGGTAGTGTNNNNNNNNCCTTTGTTTGGTTGTG	200 picomole Ultramer DNA Plate Oligo	Standard Desalting	Quantity Only	0.2
Plate 14	A03	65043_0743_SNP_a	GCATCTGAGCGGTGTCCACAGACTCTTCAGCTTCCCGATATCCGACGGTAGTGTNNNNNNNNTTCGTCTTCGGAAGCTG	200 picomole Ultramer DNA Plate Oligo	Standard Desalting	Quantity Only	0.2
Plate 14	A04	65098_0744	CGGCGATTACGACGTTTATTTACTTGAGCCTTCAGCTTCCCGATATCCGACGGTAGTGTNNNNNNNNGGAGGAAGAGACTCAA	200 picomole Ultramer DNA Plate Oligo	Standard Desalting	Quantity Only	0.2
Plate 14	A05	65129_0745	GAGATTTATTTATAATCAGCAGCATGAGACTTCAGCTTCCCGATATCCGACGGTAGTGTNNNNNNNNTTTTATGATCGGGCAT	200 picomole Ultramer DNA Plate Oligo	Standard Desalting	Quantity Only	0.2
Plate 14	A06	65156_0746	CCACCAACAAATACGCCTACCTTCAGCTTCCCGATATCCGACGGTAGTGTNNNNNNNNTCCACTCTTTGGTCGTTTATATCC	200 picomole Ultramer DNA Plate Oligo	Standard Desalting	Quantity Only	0.2
Plate 14	A07	65159_0747	GTGCATGTAATAGTTAACCTTTTGGTCTTCAGCTTCCCGATATCCGACGGTAGTGTNNNNNNNNGGGCTTTATTTGCTTACG	200 picomole Ultramer DNA Plate Oligo	Standard Desalting	Quantity Only	0.2
Plate 14	A08	65164_0748	CCGAGGAATATCACTCAATATGGGCTTCAGCTTCCCGATATCCGACGGTAGTGTNNNNNNNNCTGTGTTCGCTTCGAGCTGTA	200 picomole Ultramer DNA Plate Oligo	Standard Desalting	Quantity Only	0.2
Plate 14	A09	65200_0749	CGACTGTGGTGGTTGTAGCTGCTTCAGCTTCCCGATATCCGACGGTAGTGTNNNNNNNNTGGCTTCTGTTTCGGTTGGTTCTG	200 picomole Ultramer DNA Plate Oligo	Standard Desalting	Quantity Only	0.2
Plate 14	A10	65213_0750	GTGAATTTGGTGGAAGCTATTCAATGATCTTCAGCTTCCCGATATCCGACGGTAGTGTNNNNNNNNGATGGCGGTGATCAGTG	200 picomole Ultramer DNA Plate Oligo	Standard Desalting	Quantity Only	0.2
Plate 14	A11	65291_0753	GGGTAGTGAGGGGTTTCGTGAGTTCCTTCAGCTTCCCGATATCCGACGGTAGTGTNNNNNNNNGAGCCAAAATGGCACA	200 picomole Ultramer DNA Plate Oligo	Standard Desalting	Quantity Only	0.2
Plate 14	A12	65307_0754	GAAAAAACTTACAGCGTAAAGGGTGACCCTTCAGCTTCCCGATATCCGACGGTAGTGTNNNNNNNNATCAAAGAAAATAAAAC	200 picomole Ultramer DNA Plate Oligo	Standard Desalting	Quantity Only	0.2
Plate 14	B01	65351_0755	GCAGACCCAAAAATTGGCAGGAATGTTCTCTTCAGCTTCCCGATATCCGACGGTAGTGTNNNNNNNNAGACAAAACATCCCCA	200 picomole Ultramer DNA Plate Oligo	Standard Desalting	Quantity Only	0.2
Plate 14	B02	65380_0756	GCAGAGTTAGCTAGGATCCCTTCAGCTTCCCGATATCCGACGGTAGTGTNNNNNNNNAACAAGGGAGAATCGAAAACA	200 picomole Ultramer DNA Plate Oligo	Standard Desalting	Quantity Only	0.2
Plate 14	B03	65385_0757	AATTGTTTTCGACAATTACTACAAATACCCTTCAGCTTCCCGATATCCGACGGTAGTGTNNNNNNNNTAAATGCATTTTGCTG	200 picomole Ultramer DNA Plate Oligo	Standard Desalting	Quantity Only	0.2
Plate 14	B04	65400_0758	CTAGGCAAATCCTTGCTGGGTTTGTGACCTTCAGCTTCCCGATATCCGACGGTAGTGTNNNNNNNNGGAGAGAAGAAATACC	200 picomole Ultramer DNA Plate Oligo	Standard Desalting	Quantity Only	0.2
Plate 14	B05	65513_0759	GTGGTTGTGGGCTGATGAGTGGTTCCTTCAGCTTCCCGATATCCGACGGTAGTGTNNNNNNNNTTGTACGGATTGTTCGAGG	200 picomole Ultramer DNA Plate Oligo	Standard Desalting	Quantity Only	0.2
Plate 14	B06	65543_0760	CGTTGATCCATGATCTGAAGAAAGGTGCTTCAGCTTCCCGATATCCGACGGTAGTGTNNNNNNNNAGATTAACAAGAGAAGAC	200 picomole Ultramer DNA Plate Oligo	Standard Desalting	Quantity Only	0.2
Plate 14	B07	65631_0761	GTTCATGATCGATTGGTTCTATGGCGTCTTCAGCTTCCCGATATCCGACGGTAGTGTNNNNNNNNTTGCCGTTTTCCGTTTCT	200 picomole Ultramer DNA Plate Oligo	Standard Desalting	Quantity Only	0.2
Plate 14	B08	65641_0762	CGTTCTTGGTGTTGTTGGGGCTTCAGCTTCCCGATATCCGACGGTAGTGTNNNNNNNNGAGACAATTGTCATTCTCTGTTGG	200 picomole Ultramer DNA Plate Oligo	Standard Desalting	Quantity Only	0.2
Plate 14	B09	65677_0763	GTTCTTGTTTTGTGTATGTGTGCGACGGCTTCAGCTTCCCGATATCCGACGGTAGTGTNNNNNNNNTACCCTTAAGACTGTGT	200 picomole Ultramer DNA Plate Oligo	Standard Desalting	Quantity Only	0.2
Plate 14	B10	65791_0765	GCCAAGTGTTCTACTATCTGACCAACTTCAGCTTCCCGATATCCGACGGTAGTGTNNNNNNNNGACTTTTGAGTGTTCATGCC	200 picomole Ultramer DNA Plate Oligo	Standard Desalting	Quantity Only	0.2
Plate 14	B11	65797_0766_SNP_a	GCAAATAAATGGGAGAAGTTTCTTAAACACTTCAGCTTCCCGATATCCGACGGTAGTGTNNNNNNNNACGCAAAATAGAAAAA	200 picomole Ultramer DNA Plate Oligo	Standard Desalting	Quantity Only	0.2
Plate 14	B12	66010_0767	CTGGATTTTTGGCTGGGACCGAAGCTTCAGCTTCCCGATATCCGACGGTAGTGTNNNNNNNNGAAGAGAAAGAAACAAA	200 picomole Ultramer DNA Plate Oligo	Standard Desalting	Quantity Only	0.2
Plate 14	C01	66088_0768	GTGAAACCATCTCAAGATTCTGTCCTTGCTTCAGCTTCCCGATATCCGACGGTAGTGTNNNNNNNNAATATACATCACCTCC	200 picomole Ultramer DNA Plate Oligo	Standard Desalting	Quantity Only	0.2
Plate 14	C02	66130_0769	AGAATCAGCAACCTCCCTGATCTTCAGCTTCCCGATATCCGACGGTAGTGTNNNNNNNNGGGTTTGTTTTGATTGAATGTTTC	200 picomole Ultramer DNA Plate Oligo	Standard Desalting	Quantity Only	0.2
Plate 14	C03	66143_0103	GAATATATCATCCATCTTTTTTGTTGATGCTTCAGCTTCCCGATATCCGACGGTAGTGTNNNNNNNNCAAACGGATTTAGGAG	200 picomole Ultramer DNA Plate Oligo	Standard Desalting	Quantity Only	0.2
Plate 14	C04	66190_0771_SNP_a	GTTTGGTTCAGTCCGGGTTTGGTATGGCTTCAGCTTCCCGATATCCGACGGTAGTGTNNNNNNNNTGAGCAAGTAGCTGCA	200 picomole Ultramer DNA Plate Oligo	Standard Desalting	Quantity Only	0.2
Plate 14	C05	66204_0145	GCAGGCGGAGATTAGGAGTTTGCTTCAGCTTCCCGATATCCGACGGTAGTGTNNNNNNNNATCATGGTGTTTGGAAAAGG	200 picomole Ultramer DNA Plate Oligo	Standard Desalting	Quantity Only	0.2
Plate 14	C06	66655_0773	CGAGAGTTTATTCTTCAAGAAGCTTTCTCTTCAGCTTCCCGATATCCGACGGTAGTGTNNNNNNNNTTGGGCTTTTATTGGG	200 picomole Ultramer DNA Plate Oligo	Standard Desalting	Quantity Only	0.2
Plate 14	C07	66776_0774	GAGACTCTATGGTTGAGATGATTGTAGCCTTCAGCTTCCCGATATCCGACGGTAGTGTNNNNNNNNCAGAGAGACACAAGAA	200 picomole Ultramer DNA Plate Oligo	Standard Desalting	Quantity Only	0.2
Plate 14	C08	66806_0775	GCAAGATCAGAAGTGTTTGAGGAGCTTCAGCTTCCCGATATCCGACGGTAGTGTNNNNNNNNAAGGCTAATGGCACGG	200 picomole Ultramer DNA Plate Oligo	Standard Desalting	Quantity Only	0.2
Plate 14	C09	66949_0776	CACTCGGTGGAAAAAAAAAACCTTACTTCAGCTTCCCGATATCCGACGGTAGTGTNNNNNNNNTCTCTTCGCTTTTTTTGGG	200 picomole Ultramer DNA Plate Oligo	Standard Desalting	Quantity Only	0.2
Plate 14	C10	66980_0777	CATCAAGTCTTTCTTGGAAAAGTAGACCCCTTCAGCTTCCCGATATCCGACGGTAGTGTNNNNNNNNATTTGTTACCCAGTTC	200 picomole Ultramer DNA Plate Oligo	Standard Desalting	Quantity Only	0.2
Plate 14	C11	66981_0035	GAATATGGTTAGTCATGGATCTAAGCCCTTCAGCTTCCCGATATCCGACGGTAGTGTNNNNNNNNCATACACGGTTTTTTATT	200 picomole Ultramer DNA Plate Oligo	Standard Desalting	Quantity Only	0.2
Plate 14	C12	67222_0778	TGTGTTCATGTTTGAGAACAGTTCTTAATCTTCAGCTTCCCGATATCCGACGGTAGTGTNNNNNNNNTTTTTGGTGAGAATAT	200 picomole Ultramer DNA Plate Oligo	Standard Desalting	Quantity Only	0.2
Plate 14	D01	67240_0779	GAAGATAATAAACATGGCAAACATGGCTTCAGCTTCCCGATATCCGACGGTAGTGTNNNNNNNNAGGACTATAGCTTGTTTGG	200 picomole Ultramer DNA Plate Oligo	Standard Desalting	Quantity Only	0.2
Plate 14	D02	67285_0780	ACAGAATTGAATTCTCCATTAGTCCAACTTCAGCTTCCCGATATCCGACGGTAGTGTNNNNNNNNCTTTCTCTTCTTCTTCTT	200 picomole Ultramer DNA Plate Oligo	Standard Desalting	Quantity Only	0.2
Plate 14	D03	67333_0782	ACACGGAGCGTCAGAGCAACCCCACTTCAGCTTCCCGATATCCGACGGTAGTGTNNNNNNNNCTCTCCCTAGCTAGTAAGTG	200 picomole Ultramer DNA Plate Oligo	Standard Desalting	Quantity Only	0.2
Plate 14	D04	67426_0784	GTCTTCCTCAGCTTCCTGAGCTTCTTCTTCAGCTTCCCGATATCCGACGGTAGTGTNNNNNNNNACAAAAACAAAATCAAG	200 picomole Ultramer DNA Plate Oligo	Standard Desalting	Quantity Only	0.2
Plate 14	D05	67439_0785	GAGTTTGGAAGATTGTTGGTCTCGTGGAGCTTCAGCTTCCCGATATCCGACGGTAGTGTNNNNNNNNAAAGGTCTCGTGCATG	200 picomole Ultramer DNA Plate Oligo	Standard Desalting	Quantity Only	0.2
Plate 14	D06	67478_0786	GGTACTATTGAATCATGGATATTAGTGCCCTTCAGCTTCCCGATATCCGACGGTAGTGTNNNNNNNNTCTGAAATGTGCAGCC	200 picomole Ultramer DNA Plate Oligo	Standard Desalting	Quantity Only	0.2
Plate 14	D07	67485_0787	GCTTTTACTGTGTTTGATTGATCGGATCGCTTCAGCTTCCCGATATCCGACGGTAGTGTNNNNNNNNATATACAAAACAAACG	200 picomole Ultramer DNA Plate Oligo	Standard Desalting	Quantity Only	0.2
Plate 14	D08	67531_0789	GCTCACATGTGCAAGCTTGGATGCAGCTTCAGCTTCCCGATATCCGACGGTAGTGTNNNNNNNNTTTGTTGTTGGGCTTGG	200 picomole Ultramer DNA Plate Oligo	Standard Desalting	Quantity Only	0.2
Plate 14	D09	67628_0791	CTAAATGTGCTTCCTAACGTCCTCCTTCAGCTTCCCGATATCCGACGGTAGTGTNNNNNNNNCCTTCAAATTAAACTTGTACC	200 picomole Ultramer DNA Plate Oligo	Standard Desalting	Quantity Only	0.2
Plate 14	D10	67684_0792	CGTGGAGTGTGTGTAACCGGGTCCTTCAGCTTCCCGATATCCGACGGTAGTGTNNNNNNNNGAGTTTGAGTATCTCGGGG	200 picomole Ultramer DNA Plate Oligo	Standard Desalting	Quantity Only	0.2
Plate 14	D11	67777_0793_SNP_a	CAGAGGTTTCAGTTAAGTCTGCCTCAAGCTTCAGCTTCCCGATATCCGACGGTAGTGTNNNNNNNNTGATGATCCCAATGAGC	200 picomole Ultramer DNA Plate Oligo	Standard Desalting	Quantity Only	0.2
Plate 14	D12	67950_0794	CCAAATTGGGGATTTTAACGGGCTTGGCGCTTCAGCTTCCCGATATCCGACGGTAGTGTNNNNNNNNAGTCTCCATTACTGAG	200 picomole Ultramer DNA Plate Oligo	Standard Desalting	Quantity Only	0.2
Plate 14	E01	68836_0795	GCAACATAATGGCTAAACTAATGTCTAGCCTTCAGCTTCCCGATATCCGACGGTAGTGTNNNNNNNNAACCAACAACAATCAA	200 picomole Ultramer DNA Plate Oligo	Standard Desalting	Quantity Only	0.2
Plate 14	E02	68959_0796	ATCTCCACCGGTCATGTTCTACGGCGCCGCTTCAGCTTCCCGATATCCGACGGTAGTGTNNNNNNNNATTACGTAACATGATA	200 picomole Ultramer DNA Plate Oligo	Standard Desalting	Quantity Only	0.2
Plate 14	E03	69144_0797	ACCTGCCGCTTTGTCACTCGCAGGCTTCAGCTTCCCGATATCCGACGGTAGTGTNNNNNNNNTGGAGGAGGAAGCAAGGG	200 picomole Ultramer DNA Plate Oligo	Standard Desalting	Quantity Only	0.2
Plate 14	E04	69516_0798	GCCACCTTGATTATGAACATATCCTTCAGCTTCCCGATATCCGACGGTAGTGTNNNNNNNNACCCTTGGCTTTGGTTGTAAG	200 picomole Ultramer DNA Plate Oligo	Standard Desalting	Quantity Only	0.2
Plate 14	E05	69626_0799	ACAAAAAAAAGCACAACGCCACTTCAGCTTCCCGATATCCGACGGTAGTGTNNNNNNNNGGGTTCTGGAGTTTGGTGTG	200 picomole Ultramer DNA Plate Oligo	Standard Desalting	Quantity Only	0.2
Plate 14	E06	69707_0800	CGCCACAGCGCAATATCTATATCGGCGTACTTCAGCTTCCCGATATCCGACGGTAGTGTNNNNNNNNAAGCCTACAACACAAA	200 picomole Ultramer DNA Plate Oligo	Standard Desalting	Quantity Only	0.2
Plate 14	E07	69780_0801_SNP_a	CTCAAGGTTTGACACTGTTGATACAAGCCTTCAGCTTCCCGATATCCGACGGTAGTGTNNNNNNNNGGTGTTCAATCTGGTGG	200 picomole Ultramer DNA Plate Oligo	Standard Desalting	Quantity Only	0.2
Plate 14	E08	70564_0148	GTGGACATTCCGGTCAAGGAGTCCAGCCTTCAGCTTCCCGATATCCGACGGTAGTGTNNNNNNNNGAACCCGACTTTTCTGTA	200 picomole Ultramer DNA Plate Oligo	Standard Desalting	Quantity Only	0.2
Plate 14	E09	70913_0802	ACTTAGGTATGAAATCTAGAATGTTGTGTCTTCAGCTTCCCGATATCCGACGGTAGTGTNNNNNNNNAGAACACCGAAAAAAA	200 picomole Ultramer DNA Plate Oligo	Standard Desalting	Quantity Only	0.2
Plate 14	E10	71113_0149	CAAGTTCCTCAACCCAACCAAAAAAACTCTTCAGCTTCCCGATATCCGACGGTAGTGTNNNNNNNNTTTCTCTTTTTCTTCTT	200 picomole Ultramer DNA Plate Oligo	Standard Desalting	Quantity Only	0.2
Plate 14	E11	71200_0803	CATAGAGAAAGTGTCTACTCCTTTGGCTTCAGCTTCCCGATATCCGACGGTAGTGTNNNNNNNNTCTCTCTCTCTCTTTCG	200 picomole Ultramer DNA Plate Oligo	Standard Desalting	Quantity Only	0.2
Plate 14	E12	71251_0804_SNP_a	GTGAGTGGTGGATAGAGTAATGGAACCTTCAGCTTCCCGATATCCGACGGTAGTGTNNNNNNNNGACAACAATGAAACCA	200 picomole Ultramer DNA Plate Oligo	Standard Desalting	Quantity Only	0.2
Plate 14	F01	71253_0805	GCTTACACGTCAATTTACTGAATCTTGCTTCAGCTTCCCGATATCCGACGGTAGTGTNNNNNNNNGCGGCGTTGTTGAGTG	200 picomole Ultramer DNA Plate Oligo	Standard Desalting	Quantity Only	0.2
Plate 14	F02	71441	AGAGAGAGAGAGAGAGAGAGAGAGAGAGTCTTCAGCTTCCCGATATCCGACGGTAGTGTNNNNNNNNACAAGAAGGCAAAGTA	200 picomole Ultramer DNA Plate Oligo	Standard Desalting	Quantity Only	0.2
Plate 14	F03	71592_0808	GCTAGAAGATATTACTACGATTTTGGTTGCTTCAGCTTCCCGATATCCGACGGTAGTGTNNNNNNNNAAAAGGGGGCTTGCAA	200 picomole Ultramer DNA Plate Oligo	Standard Desalting	Quantity Only	0.2
Plate 14	F04	71953_0150	CGGACCATCGTTGTCGATCCATCTTCAGCTTCCCGATATCCGACGGTAGTGTNNNNNNNNCCCAAATAGTTTCATCAATCCA	200 picomole Ultramer DNA Plate Oligo	Standard Desalting	Quantity Only	0.2
Plate 14	F05	71964_0037	CGCAACTGGTGTTGATCGACACCAAGAGCTTCAGCTTCCCGATATCCGACGGTAGTGTNNNNNNNNAACAATGACCTAAAATC	200 picomole Ultramer DNA Plate Oligo	Standard Desalting	Quantity Only	0.2
Plate 14	F06	72095_0152	AGGGCCAACCATATCCATCTCTCGCCCACCTTCAGCTTCCCGATATCCGACGGTAGTGTNNNNNNNNGGATTAGTGATTTGGT	200 picomole Ultramer DNA Plate Oligo	Standard Desalting	Quantity Only	0.2
Plate 14	F07	72184_0810	GCAGCATAAAAAGGGTAACAAGTTGTTCCTTCAGCTTCCCGATATCCGACGGTAGTGTNNNNNNNNCACCTAAAATATCAAAC	200 picomole Ultramer DNA Plate Oligo	Standard Desalting	Quantity Only	0.2
Plate 14	F08	72193_0811	GGACTGGCTCTTGTGTTGTGGTGGCTTCAGCTTCCCGATATCCGACGGTAGTGTNNNNNNNNAAACCTCAATGTCGATAACAC	200 picomole Ultramer DNA Plate Oligo	Standard Desalting	Quantity Only	0.2
Plate 14	F09	72202_0812	GTCAACCTCTAGAAGACTCGTGTAGGTCTTCAGCTTCCCGATATCCGACGGTAGTGTNNNNNNNNGTTTTGGCGGTTGCGATT	200 picomole Ultramer DNA Plate Oligo	Standard Desalting	Quantity Only	0.2
Plate 14	F10	72252_0814	CATTAGATAGGAGGGACATAAGTCGATAACTTCAGCTTCCCGATATCCGACGGTAGTGTNNNNNNNNAAGATGCAAGAACATC	200 picomole Ultramer DNA Plate Oligo	Standard Desalting	Quantity Only	0.2
Plate 14	F11	72569_0815	GTGGCCCATCTCCTGCTTCGTCAATGCTTCAGCTTCCCGATATCCGACGGTAGTGTNNNNNNNNCCACTTAGATCTAGCAAAA	200 picomole Ultramer DNA Plate Oligo	Standard Desalting	Quantity Only	0.2
Plate 14	F12	72657_0817	GCACAACCAAGGATCCCGAAAGTGTGCACTTCAGCTTCCCGATATCCGACGGTAGTGTNNNNNNNNTGAGCTTTGAGCTTTG	200 picomole Ultramer DNA Plate Oligo	Standard Desalting	Quantity Only	0.2
Plate 14	G01	72726_0819_SNP_a	CACCATCCAAATCAAACTCGCTTCAGCTTCCCGATATCCGACGGTAGTGTNNNNNNNNCATGACCATAATTCTACTTTCGTCA	200 picomole Ultramer DNA Plate Oligo	Standard Desalting	Quantity Only	0.2
Plate 14	G02	72904_0821	GTGATACTGAGAAGATCTGTGAGCTTCAGCTTCCCGATATCCGACGGTAGTGTNNNNNNNNGTGGGTGAGACAAGTGA	200 picomole Ultramer DNA Plate Oligo	Standard Desalting	Quantity Only	0.2
Plate 14	G03	72947_0154	GCAAGTCCATTGACTATGCAAATTTAACACTTCAGCTTCCCGATATCCGACGGTAGTGTNNNNNNNNCGCGATGATGTTCATG	200 picomole Ultramer DNA Plate Oligo	Standard Desalting	Quantity Only	0.2
Plate 14	G04	72972_0822_SNP_a	GTGGCTTTGTTTTGGTTCTGTTGCTTCAGCTTCCCGATATCCGACGGTAGTGTNNNNNNNNAGTTCGAATCTGACGTTCGAAG	200 picomole Ultramer DNA Plate Oligo	Standard Desalting	Quantity Only	0.2
Plate 14	G05	73024_0825	CGAACACCGAGTTGGGTTAGTTTGGACTCCTTCAGCTTCCCGATATCCGACGGTAGTGTNNNNNNNNCATAAAGACCAGATTC	200 picomole Ultramer DNA Plate Oligo	Standard Desalting	Quantity Only	0.2
Plate 14	G06	73026_0826	GTGGGTCAAATGATGGTACAAGTGGGCTTCAGCTTCCCGATATCCGACGGTAGTGTNNNNNNNNGGAGAAGAAAGTCTTTAGC	200 picomole Ultramer DNA Plate Oligo	Standard Desalting	Quantity Only	0.2
Plate 14	G07	73034_0115	ACCGGGTACAGCTGTGAACGGCGTCTTCAGCTTCCCGATATCCGACGGTAGTGTNNNNNNNNGAGGTTATTAATTTATCGAGT	200 picomole Ultramer DNA Plate Oligo	Standard Desalting	Quantity Only	0.2
Plate 14	G08	73099_0829	GACTGGGTTTTGGAAGTGTTTGATACCCCTTCAGCTTCCCGATATCCGACGGTAGTGTNNNNNNNNGGAATCAGAAGATAAA	200 picomole Ultramer DNA Plate Oligo	Standard Desalting	Quantity Only	0.2
Plate 14	G09	73101_0830	CTAGTGTTCCAACTCTCTAGGAACCTTCAGCTTCCCGATATCCGACGGTAGTGTNNNNNNNNGGTAGAGAAGATAGTGAAGGG	200 picomole Ultramer DNA Plate Oligo	Standard Desalting	Quantity Only	0.2
Plate 14	G10	73178_0039	GGTCAAGCTCAAAGAGGAATACAAGCGGCTTCAGCTTCCCGATATCCGACGGTAGTGTNNNNNNNNGACGAAGATAGGAACC	200 picomole Ultramer DNA Plate Oligo	Standard Desalting	Quantity Only	0.2
Plate 14	G11	73208_0834	GAGGTTAGTTTGACGATGTGGTGACCGACTTCAGCTTCCCGATATCCGACGGTAGTGTNNNNNNNNCCCAAGAGTTAATAATC	200 picomole Ultramer DNA Plate Oligo	Standard Desalting	Quantity Only	0.2
Plate 14	G12	73253_0835	GTGCTAGTGCTGTTGTTCATCGTGCTTCAGCTTCCCGATATCCGACGGTAGTGTNNNNNNNNTTTGGTTGGTGGTTTTTAGGG	200 picomole Ultramer DNA Plate Oligo	Standard Desalting	Quantity Only	0.2
Plate 14	H01	73370_0836_SNP_a	CGGATAAGAGAAGAGTGACGATTCAGCTTCAGCTTCCCGATATCCGACGGTAGTGTNNNNNNNNCGATTACTGATTTTGCTTG	200 picomole Ultramer DNA Plate Oligo	Standard Desalting	Quantity Only	0.2
Plate 14	H02	73378_0837	GGGAGGTGAGATCCTTTCTGTAGCTGAACTTCAGCTTCCCGATATCCGACGGTAGTGTNNNNNNNNGAAGTCGTAGAGGATG	200 picomole Ultramer DNA Plate Oligo	Standard Desalting	Quantity Only	0.2
Plate 14	H03	73407_0117_SNP_a	GCCTAGTGTGTGTGTGTTGCTTCAGCTTCCCGATATCCGACGGTAGTGTNNNNNNNNATCTCAAAAGCTCTACCGTTTCTTAG	200 picomole Ultramer DNA Plate Oligo	Standard Desalting	Quantity Only	0.2
Plate 14	H04	73415_0118_SNP_a	GCAGGAAGATGTTGCCAAAGTGGACAGAGCTTCAGCTTCCCGATATCCGACGGTAGTGTNNNNNNNNGATCGAAAGAATTCAA	200 picomole Ultramer DNA Plate Oligo	Standard Desalting	Quantity Only	0.2
Plate 14	H05	73442_0119	CCACAGGGCTGGCCTCACCTTCAGCTTCCCGATATCCGACGGTAGTGTNNNNNNNNGCTGAGGTGATTTTGAGTTTTATGGGG	200 picomole Ultramer DNA Plate Oligo	Standard Desalting	Quantity Only	0.2
Plate 14	H06	73517_0841	GCTGGTAAGGATGGAAAGCTTTGGGTGACTTCAGCTTCCCGATATCCGACGGTAGTGTNNNNNNNNAAGAGGTGATCTCTAGA	200 picomole Ultramer DNA Plate Oligo	Standard Desalting	Quantity Only	0.2
Plate 14	H07	73595_0843	GCGACCATGGAATCAGAGGGAGTGTCACTCTTCAGCTTCCCGATATCCGACGGTAGTGTNNNNNNNNAAGCGTAAACATTGAC	200 picomole Ultramer DNA Plate Oligo	Standard Desalting	Quantity Only	0.2
Plate 14	H08	73612_0844	GGACCTGTGACGATAGCAGTGAGACCAGCTTCAGCTTCCCGATATCCGACGGTAGTGTNNNNNNNNCCTTTAGTCCATTAACA	200 picomole Ultramer DNA Plate Oligo	Standard Desalting	Quantity Only	0.2
Plate 14	H09	73627_0845	GCACACTCGAAGAGGGAAATAAAGAAACACTTCAGCTTCCCGATATCCGACGGTAGTGTNNNNNNNNTAGGTCACACACAACA	200 picomole Ultramer DNA Plate Oligo	Standard Desalting	Quantity Only	0.2
Plate 14	H10	73666_0847	GCAGAGGACTGGTTCTTCTTATATAGAGCTTCAGCTTCCCGATATCCGACGGTAGTGTNNNNNNNNGGAAGAAGCAGCCATTG	200 picomole Ultramer DNA Plate Oligo	Standard Desalting	Quantity Only	0.2
Plate 14	H11	73783_0848	GCTCCCATCTAATTTCCTCTCATGCTTCAGCTTCCCGATATCCGACGGTAGTGTNNNNNNNNCTCAACTATATATGTCCTCAA	200 picomole Ultramer DNA Plate Oligo	Standard Desalting	Quantity Only	0.2
Plate 14	H12	73788_0849	CATTTGTGATAATCGAACCAGGCGGCCTTCAGCTTCCCGATATCCGACGGTAGTGTNNNNNNNNAGAAGAAGAAGATAACATA	200 picomole Ultramer DNA Plate Oligo	Standard Desalting	Quantity Only	0.2
Plate 15	A01	73821_0850	TGACAATGGTAGGGTTACGTGTAGGTGAGCTTCAGCTTCCCGATATCCGACGGTAGTGTNNNNNNNNAATGAGAAAGAACACA	200 picomole Ultramer DNA Plate Oligo	Standard Desalting	Quantity Only	0.2
Plate 15	A02	73823_0851_SNP_a	GTTTACCGCGTAAGAATCAACCGATGATGCTTCAGCTTCCCGATATCCGACGGTAGTGTNNNNNNNNAATGGCAGAGGTAGCG	200 picomole Ultramer DNA Plate Oligo	Standard Desalting	Quantity Only	0.2
Plate 15	A03	73871_0852	TCTTTCTCCACCATCATCAGCAACCACCTTCAGCTTCCCGATATCCGACGGTAGTGTNNNNNNNNATCAATTCTCATCTCAAC	200 picomole Ultramer DNA Plate Oligo	Standard Desalting	Quantity Only	0.2
Plate 15	A04	73985_0853	TCTGCAGCGAAGCAGAAACTTATGTTCACCTTCAGCTTCCCGATATCCGACGGTAGTGTNNNNNNNNCAATATCTCAAATCCC	200 picomole Ultramer DNA Plate Oligo	Standard Desalting	Quantity Only	0.2
Plate 15	A05	74060_0854	GCATGTAGCTAGGTACGTAGAACCTTGAACTTCAGCTTCCCGATATCCGACGGTAGTGTNNNNNNNNAGATATGAAGAGAAGA	200 picomole Ultramer DNA Plate Oligo	Standard Desalting	Quantity Only	0.2
Plate 15	A06	74235_0122	CGCCCTTGAAGCTTGCGCCCTTCAGCTTCCCGATATCCGACGGTAGTGTNNNNNNNNCAGGTTCTTTTCATTTCTCCCTATTT	200 picomole Ultramer DNA Plate Oligo	Standard Desalting	Quantity Only	0.2
Plate 15	A07	74356_0040	TTCCTTCTCGCTCCGCCGCCTTCAGCTTCCCGATATCCGACGGTAGTGTNNNNNNNNTTGTTCTGATACCACATTAGAGTTTT	200 picomole Ultramer DNA Plate Oligo	Standard Desalting	Quantity Only	0.2
Plate 15	A08	74375_0858	GCTTGGCCTATTAGTAGTAGCTAGCTCTTCAGCTTCCCGATATCCGACGGTAGTGTNNNNNNNNCCATTAAAGCAGCTTTAGC	200 picomole Ultramer DNA Plate Oligo	Standard Desalting	Quantity Only	0.2
Plate 15	A09	74377_0859	GTCTGGGTCAGGGATATGCGCGAAGCGCCTTCAGCTTCCCGATATCCGACGGTAGTGTNNNNNNNNCCCCAACGTAAGCCAA	200 picomole Ultramer DNA Plate Oligo	Standard Desalting	Quantity Only	0.2
Plate 15	A10	74535_0861	CGTACCTTGGCTTTTTCACCAAACTCTCTTCAGCTTCCCGATATCCGACGGTAGTGTNNNNNNNNACACTAAACAACCATT	200 picomole Ultramer DNA Plate Oligo	Standard Desalting	Quantity Only	0.2
Plate 15	A11	74536_0862	AGGAAACGAAGAAATCCCCAAATCACTCCTTCAGCTTCCCGATATCCGACGGTAGTGTNNNNNNNNAATCAAACGAGAGAGAA	200 picomole Ultramer DNA Plate Oligo	Standard Desalting	Quantity Only	0.2
Plate 15	A12	74537_0863	GAGGGTGTGTGTGTGTGCGCGGCTTCAGCTTCCCGATATCCGACGGTAGTGTNNNNNNNNCGAAAATCGACAAAACCTATA	200 picomole Ultramer DNA Plate Oligo	Standard Desalting	Quantity Only	0.2
Plate 15	B01	74597_0155	ACAGAAGAGAAGGTGTCGTAAACCCTAGTCTTCAGCTTCCCGATATCCGACGGTAGTGTNNNNNNNNCTTTGGATTCTGCTTC	200 picomole Ultramer DNA Plate Oligo	Standard Desalting	Quantity Only	0.2
Plate 15	B02	74701_0156	CGTAAGAGTTTAGAAGAGTGGAGTCAGCTTCAGCTTCCCGATATCCGACGGTAGTGTNNNNNNNNGAAAAGTACACCGAAC	200 picomole Ultramer DNA Plate Oligo	Standard Desalting	Quantity Only	0.2
Plate 15	B03	74862_0866	TCATGGTTTTCTAGTCAGTCTATAGCCCTTCAGCTTCCCGATATCCGACGGTAGTGTNNNNNNNNTTGCTGGGCCAAGATGGT	200 picomole Ultramer DNA Plate Oligo	Standard Desalting	Quantity Only	0.2
Plate 15	B04	74867_0867	GGTGTGAGATTGATTTGTTTGATCCTTCAGCTTCCCGATATCCGACGGTAGTGTNNNNNNNNGGGAGTTGTCGGATAAGTTG	200 picomole Ultramer DNA Plate Oligo	Standard Desalting	Quantity Only	0.2
Plate 15	B05	74900_0868_SNP_a	GCAGGTATGTTCTCGATCCGAAACCCTAGCTTCAGCTTCCCGATATCCGACGGTAGTGTNNNNNNNNCGGTCGGTTATTTCGG	200 picomole Ultramer DNA Plate Oligo	Standard Desalting	Quantity Only	0.2
Plate 15	B06	74917_0869	TGGAGGTCGTTATTTGTTCATCGGCTTCAGCTTCCCGATATCCGACGGTAGTGTNNNNNNNNGGAGATGGGGAGAGAG	200 picomole Ultramer DNA Plate Oligo	Standard Desalting	Quantity Only	0.2
Plate 15	B07	75040_0870	GTTTTGGAGAGGAGAATCTGAGGGTTGGGCTTCAGCTTCCCGATATCCGACGGTAGTGTNNNNNNNNTACAGAGTGAGACAAG	200 picomole Ultramer DNA Plate Oligo	Standard Desalting	Quantity Only	0.2
Plate 15	B08	75045_0871	GAGAGATAGAGTAGTTGATACGTGGTTGCTTCAGCTTCCCGATATCCGACGGTAGTGTNNNNNNNNACAAAAAACATTCCCG	200 picomole Ultramer DNA Plate Oligo	Standard Desalting	Quantity Only	0.2
Plate 15	B09	75060_0157	GTAGGACGGCGTATGTGATGAACCTACTTCAGCTTCCCGATATCCGACGGTAGTGTNNNNNNNNGCATTTAAATGTAGCTCCG	200 picomole Ultramer DNA Plate Oligo	Standard Desalting	Quantity Only	0.2
Plate 15	B10	75077_0872	GGGTGGCTGTTTCCGGTGAGAATAGATCGCTTCAGCTTCCCGATATCCGACGGTAGTGTNNNNNNNNAGAGAGCTTAAAACAG	200 picomole Ultramer DNA Plate Oligo	Standard Desalting	Quantity Only	0.2
Plate 15	B11	75092_0873	GGTATGTCGTGGTGCTAACAGCTCTTTCCTTCAGCTTCCCGATATCCGACGGTAGTGTNNNNNNNNGTGCCTTCATTGCATG	200 picomole Ultramer DNA Plate Oligo	Standard Desalting	Quantity Only	0.2
Plate 15	B12	75133_0874	GCGGGTTTGTTGATAGTCTGTAGTCTCTTCTTCAGCTTCCCGATATCCGACGGTAGTGTNNNNNNNNCCGTATATTTCTCCAT	200 picomole Ultramer DNA Plate Oligo	Standard Desalting	Quantity Only	0.2
Plate 15	C01	75236_0125	GTGGCTGTCTATTTTTTCTCCACCGTTCTTCAGCTTCCCGATATCCGACGGTAGTGTNNNNNNNNGAATGGTACAAAACTTGA	200 picomole Ultramer DNA Plate Oligo	Standard Desalting	Quantity Only	0.2
Plate 15	C02	75242_0158	CAGTCTTTTCTTTTCAATTGAGTTCATTCTTCAGCTTCCCGATATCCGACGGTAGTGTNNNNNNNNGTTGGGGGATTCGTTGG	200 picomole Ultramer DNA Plate Oligo	Standard Desalting	Quantity Only	0.2
Plate 15	C03	75397_0878	TCAAGTCCTGCTTCAGCAAAGAATCCCCTTCAGCTTCCCGATATCCGACGGTAGTGTNNNNNNNNCTTGCAATTGGAACCCTG	200 picomole Ultramer DNA Plate Oligo	Standard Desalting	Quantity Only	0.2
Plate 15	C04	75400_0879	TTCAAGTTCTACCGTCCGATCCATTCGCTTCAGCTTCCCGATATCCGACGGTAGTGTNNNNNNNNCTAATACCGGGTTATACC	200 picomole Ultramer DNA Plate Oligo	Standard Desalting	Quantity Only	0.2
Plate 15	C05	75500_0881_SNP_a	GGAAAAGAAATAATGTGGCAGATGCACTCTTCAGCTTCCCGATATCCGACGGTAGTGTNNNNNNNNGTATGGTGGGATCATG	200 picomole Ultramer DNA Plate Oligo	Standard Desalting	Quantity Only	0.2
Plate 15	C06	75517_0882	GACGGTCAGTAGCATGCAAGTGACTGAGTCTTCAGCTTCCCGATATCCGACGGTAGTGTNNNNNNNNGGAGAAATAGAGAATG	200 picomole Ultramer DNA Plate Oligo	Standard Desalting	Quantity Only	0.2
Plate 15	C07	75538_0883	CTCTCTCGTTTCATATGGATCCGTTGTTTCTTCAGCTTCCCGATATCCGACGGTAGTGTNNNNNNNNAAAATAATAAATAAAC	200 picomole Ultramer DNA Plate Oligo	Standard Desalting	Quantity Only	0.2
Plate 15	C08	75658_0884	CTTCACCACGGCGTGGTTCTGCGGTCTTCAGCTTCCCGATATCCGACGGTAGTGTNNNNNNNNACAGAACATCAATAGTCTAG	200 picomole Ultramer DNA Plate Oligo	Standard Desalting	Quantity Only	0.2
Plate 15	C09	75659_0885_SNP_a	CCCATCTCCCAATTAGCCCTTCAGCTTCCCGATATCCGACGGTAGTGTNNNNNNNNTCCATATTTGTCTTTTAATGTTCTAGG	200 picomole Ultramer DNA Plate Oligo	Standard Desalting	Quantity Only	0.2
Plate 15	C10	75675_0886	GGAATGTGACAAGATCCTCAGTTGCTGGCCTTCAGCTTCCCGATATCCGACGGTAGTGTNNNNNNNNAACATTAGAGAAAGAA	200 picomole Ultramer DNA Plate Oligo	Standard Desalting	Quantity Only	0.2
Plate 15	C11	75679_0159	GTCCAGTGGGCTTTCAACAAGAACAACTCCTTCAGCTTCCCGATATCCGACGGTAGTGTNNNNNNNNCGTTTAGAAGTTCAAA	200 picomole Ultramer DNA Plate Oligo	Standard Desalting	Quantity Only	0.2
Plate 15	C12	75717_0887	CTTACTCTTGATCTTCCTCTCTTCTTCAGCTTCCCGATATCCGACGGTAGTGTNNNNNNNNTCCCTTCTTATCTGTCTCCTGT	200 picomole Ultramer DNA Plate Oligo	Standard Desalting	Quantity Only	0.2
Plate 15	D01	75722_0888_SNP_a	TGCCTCCGATGCTGAAACTGACCTTCAGCTTCCCGATATCCGACGGTAGTGTNNNNNNNNTCTCCTTGGGATTTTGCATCTT	200 picomole Ultramer DNA Plate Oligo	Standard Desalting	Quantity Only	0.2
Plate 15	D02	75785_0889	GGAGGTTGAATCTCTACCGTCCCTTCAGCTTCCCGATATCCGACGGTAGTGTNNNNNNNNCGTGTTTCTGATTCTTCCGGC	200 picomole Ultramer DNA Plate Oligo	Standard Desalting	Quantity Only	0.2
Plate 15	D03	75863_0890	GCTGAGGTGGTGCTGAGTTATGTTGTAACTTCAGCTTCCCGATATCCGACGGTAGTGTNNNNNNNNAACATCTACCCCACTGA	200 picomole Ultramer DNA Plate Oligo	Standard Desalting	Quantity Only	0.2
Plate 15	D04	75878_0891	CTAAAAAAACAACAACATACCAGTTCCGCTTCAGCTTCCCGATATCCGACGGTAGTGTNNNNNNNNCTCAAAACGTTTGACCG	200 picomole Ultramer DNA Plate Oligo	Standard Desalting	Quantity Only	0.2
Plate 15	D05	75908_0160	GCGCTTTTGGCTATTTCCTCCTTCAGCTTCCCGATATCCGACGGTAGTGTNNNNNNNNGCCATGTGAGTTTCAAGTGTTTGTT	200 picomole Ultramer DNA Plate Oligo	Standard Desalting	Quantity Only	0.2
Plate 15	D06	75948_0892	GAGGAAGTGACTGCCGAGTTGTTCCTTCAGCTTCCCGATATCCGACGGTAGTGTNNNNNNNNGCAGAGAGCGAAAAATA	200 picomole Ultramer DNA Plate Oligo	Standard Desalting	Quantity Only	0.2
Plate 15	D07	75999_0893	GTGGGATACGGCAGGCCAGGAACGTTTCTTCAGCTTCCCGATATCCGACGGTAGTGTNNNNNNNNGCAGAAAATCCGAACAG	200 picomole Ultramer DNA Plate Oligo	Standard Desalting	Quantity Only	0.2
Plate 15	D08	76000_0894	CTTCGTCGGTGATGAGAGACTGAGAGAGCTTCAGCTTCCCGATATCCGACGGTAGTGTNNNNNNNNAAAATCGATCTGAACGA	200 picomole Ultramer DNA Plate Oligo	Standard Desalting	Quantity Only	0.2
Plate 15	D09	76041_0895	GCTACATGTTGATTTATAAAGGGCCGAACTTCAGCTTCCCGATATCCGACGGTAGTGTNNNNNNNNAGCTGAAGAAGAAGAAG	200 picomole Ultramer DNA Plate Oligo	Standard Desalting	Quantity Only	0.2
Plate 15	D10	76068_0896	GTCCTTTTATTACTAGAGATGCAGTAGAACTTCAGCTTCCCGATATCCGACGGTAGTGTNNNNNNNNACTTTTGGTCGCCCCC	200 picomole Ultramer DNA Plate Oligo	Standard Desalting	Quantity Only	0.2
Plate 15	D11	76081_0898	GCTTTCTGGCATATATTCTTCAAGGCTTCAGCTTCCCGATATCCGACGGTAGTGTNNNNNNNNTGTTCTGTTTCTGATGTGAG	200 picomole Ultramer DNA Plate Oligo	Standard Desalting	Quantity Only	0.2
Plate 15	D12	76176_0899_SNP_a	CATCATCCTCTGCCTCCCACATGAAACGCTTCAGCTTCCCGATATCCGACGGTAGTGTNNNNNNNNGAAATAGACAAAAAAA	200 picomole Ultramer DNA Plate Oligo	Standard Desalting	Quantity Only	0.2
Plate 15	E01	76178_0900	GTGGTGGAAATGAAGGAGGTGGTGGCTTCAGCTTCCCGATATCCGACGGTAGTGTNNNNNNNNGATGAGATTTGGGATCG	200 picomole Ultramer DNA Plate Oligo	Standard Desalting	Quantity Only	0.2
Plate 15	E02	76181_0901	TTCTCGTCTATTTTCTCGGCATTCGCTTCAGCTTCCCGATATCCGACGGTAGTGTNNNNNNNNTCGTCCCTCGTCTGATG	200 picomole Ultramer DNA Plate Oligo	Standard Desalting	Quantity Only	0.2
Plate 15	E03	76185_0902	CTATGGTTTGCGTAGGCGATGCGTAGCTTCAGCTTCCCGATATCCGACGGTAGTGTNNNNNNNNTGAGGGAGAGAAATTG	200 picomole Ultramer DNA Plate Oligo	Standard Desalting	Quantity Only	0.2
Plate 15	E04	76199_0903	GGACGAATTTGCAGCTCAGTTGCATAGAGCTTCAGCTTCCCGATATCCGACGGTAGTGTNNNNNNNNAACGCCAAGTTGGGGA	200 picomole Ultramer DNA Plate Oligo	Standard Desalting	Quantity Only	0.2
Plate 15	E05	76237_0905	GATAAGAAGACTGGTGATGATGTTTCTGCTTCAGCTTCCCGATATCCGACGGTAGTGTNNNNNNNNAGGAGAGCGATGATGG	200 picomole Ultramer DNA Plate Oligo	Standard Desalting	Quantity Only	0.2
Plate 15	E06	76244_0906	CACTTTCCCCTAAGCTATGGGATTCGAGCTTCAGCTTCCCGATATCCGACGGTAGTGTNNNNNNNNGGAAGCAAAACAAAACA	200 picomole Ultramer DNA Plate Oligo	Standard Desalting	Quantity Only	0.2
Plate 15	E07	76248_0907	GCTGCTGATGTTGCAGTTGTTGGGCTTCAGCTTCCCGATATCCGACGGTAGTGTNNNNNNNNACTATTGTTGGGACTG	200 picomole Ultramer DNA Plate Oligo	Standard Desalting	Quantity Only	0.2
Plate 15	E08	76253_0908	GATTGAAGTAAGAAGAAGCAGAAATGGCGCTTCAGCTTCCCGATATCCGACGGTAGTGTNNNNNNNNTATCGGAAAAAGATCG	200 picomole Ultramer DNA Plate Oligo	Standard Desalting	Quantity Only	0.2
Plate 15	E09	76299_0909_SNP_a	TTCCCGAAGCTCTCCTACACTTCAGCTTCCCGATATCCGACGGTAGTGTNNNNNNNNTCATGATTCTTCTTCTCCGATC	200 picomole Ultramer DNA Plate Oligo	Standard Desalting	Quantity Only	0.2
Plate 15	E10	76362_0910	GTTTGGGCCTTTGGATTAAGAAGAAGATGCTTCAGCTTCCCGATATCCGACGGTAGTGTNNNNNNNNAAAAGCTCCACCAAGT	200 picomole Ultramer DNA Plate Oligo	Standard Desalting	Quantity Only	0.2
Plate 15	E11	76363_0911	TACACGAACCTTACCAGCCACCCTTCAGCTTCCCGATATCCGACGGTAGTGTNNNNNNNNCGAGTGAAACCCGGTTTACTAGG	200 picomole Ultramer DNA Plate Oligo	Standard Desalting	Quantity Only	0.2
Plate 15	E12	76433_0912	GCCGTATATATTTGGGAATATGCTTTTCTTCAGCTTCCCGATATCCGACGGTAGTGTNNNNNNNNCTCACCTGTTGATTCGTT	200 picomole Ultramer DNA Plate Oligo	Standard Desalting	Quantity Only	0.2
Plate 15	F01	76474_0913	GTGGTAGGCATAGCTCAAACGACTGTGGTCTTCAGCTTCCCGATATCCGACGGTAGTGTNNNNNNNNAGAATCAATATCTCAA	200 picomole Ultramer DNA Plate Oligo	Standard Desalting	Quantity Only	0.2
Plate 15	F02	76495_0914	CCACCACAGCTCCGTCTCTAGCATCTTCAGCTTCCCGATATCCGACGGTAGTGTNNNNNNNNGAGGTTTTGGAGATTGAGAGT	200 picomole Ultramer DNA Plate Oligo	Standard Desalting	Quantity Only	0.2
Plate 15	F03	76533_0915	GCCTTTTGTCATGATTAGTAGCCTGCCGTCTTCAGCTTCCCGATATCCGACGGTAGTGTNNNNNNNNGAGATTGTAACCAAAA	200 picomole Ultramer DNA Plate Oligo	Standard Desalting	Quantity Only	0.2
Plate 15	F04	76560_0916_SNP_a	TCGGCTGATCTTCACTCCGCGGCAAGATCCTTCAGCTTCCCGATATCCGACGGTAGTGTNNNNNNNNGCAATTAAAACCGACC	200 picomole Ultramer DNA Plate Oligo	Standard Desalting	Quantity Only	0.2
Plate 15	F05	76671_0917	GCTCCTTTAGCGACGGCGCTTTGGACTTCAGCTTCCCGATATCCGACGGTAGTGTNNNNNNNNTGGTAAGCTGGTGCAC	200 picomole Ultramer DNA Plate Oligo	Standard Desalting	Quantity Only	0.2
Plate 15	F06	76688_0918	CGCCGCGAAAAGCACCGTCCAAAGCCTTCAGCTTCCCGATATCCGACGGTAGTGTNNNNNNNNCCAAATTAGTGATTCTCAAC	200 picomole Ultramer DNA Plate Oligo	Standard Desalting	Quantity Only	0.2
Plate 15	F07	76689_0919	CCTCAGCCAAAATCCACTCTTCAGCTTCCCGATATCCGACGGTAGTGTNNNNNNNNCTTTGTTACTGGAATATGCGCGGTCTT	200 picomole Ultramer DNA Plate Oligo	Standard Desalting	Quantity Only	0.2
Plate 15	F08	76726_0920	GTGTCACGATGCTATTGGAAAAGTAATACTTCAGCTTCCCGATATCCGACGGTAGTGTNNNNNNNNGTTGCCATTATAGGGTG	200 picomole Ultramer DNA Plate Oligo	Standard Desalting	Quantity Only	0.2
Plate 15	F09	76738_0921	GACTGGAATGAGGATTACAGTAATGAAGACTTCAGCTTCCCGATATCCGACGGTAGTGTNNNNNNNNCACATCTTTGTAGGAG	200 picomole Ultramer DNA Plate Oligo	Standard Desalting	Quantity Only	0.2
Plate 15	F10	76768_0922	GTTATTATAGCTTAGAGTTTTCTTCCTTCAGCTTCCCGATATCCGACGGTAGTGTNNNNNNNNCTTTTCTCTTACGCCATTCG	200 picomole Ultramer DNA Plate Oligo	Standard Desalting	Quantity Only	0.2
Plate 15	F11	76807_0923	GCTACACTTCCATGTCCGGTGGATAGCTCCTTCAGCTTCCCGATATCCGACGGTAGTGTNNNNNNNNAGATAAGCAAACGCCT	200 picomole Ultramer DNA Plate Oligo	Standard Desalting	Quantity Only	0.2
Plate 15	F12	76844_0924	GTGGTGTCCACGCGAAGCACCGAATCCTTCAGCTTCCCGATATCCGACGGTAGTGTNNNNNNNNGCGATAATTGACAGAGA	200 picomole Ultramer DNA Plate Oligo	Standard Desalting	Quantity Only	0.2
Plate 15	G01	76845_0925	GACACACTCTTCGGTGTTTCGGAGGCTTCAGCTTCCCGATATCCGACGGTAGTGTNNNNNNNNGGAGAAAGATTAGAAGAGGG	200 picomole Ultramer DNA Plate Oligo	Standard Desalting	Quantity Only	0.2
Plate 15	G02	76924_0926	GATATATCGCGGCCACGAAGTTACTGGCTTCAGCTTCCCGATATCCGACGGTAGTGTNNNNNNNNGAAGAGAGCAAGAAGG	200 picomole Ultramer DNA Plate Oligo	Standard Desalting	Quantity Only	0.2
Plate 15	G03	76968_0927	GTGTCATCCTGAATCCCCAGAAGGATGCTTCAGCTTCCCGATATCCGACGGTAGTGTNNNNNNNNTGGAGCCCACCTGTGC	200 picomole Ultramer DNA Plate Oligo	Standard Desalting	Quantity Only	0.2
Plate 15	G04	76992_0928	GGCGGAAGGGAAGGAGAAAGATAGTGCTTCAGCTTCCCGATATCCGACGGTAGTGTNNNNNNNNAGCGAATCAAAAGGAT	200 picomole Ultramer DNA Plate Oligo	Standard Desalting	Quantity Only	0.2
Plate 15	G05	77096_0929	GTGGAGATGATTACAAATCTAAGACCTGACTTCAGCTTCCCGATATCCGACGGTAGTGTNNNNNNNNTCAAGATTGGAGATAG	200 picomole Ultramer DNA Plate Oligo	Standard Desalting	Quantity Only	0.2
Plate 15	G06	77133_0930	GGGTGGGATTTTGCTTCGCTTGAATCCTTCAGCTTCCCGATATCCGACGGTAGTGTNNNNNNNNAGAGAATGAGACTCAGAGA	200 picomole Ultramer DNA Plate Oligo	Standard Desalting	Quantity Only	0.2
Plate 15	G07	77204_0931	GATGATAATGAGACATATACGCCGCGCTTCAGCTTCCCGATATCCGACGGTAGTGTNNNNNNNNGAAACTGAAGAAACAAAAC	200 picomole Ultramer DNA Plate Oligo	Standard Desalting	Quantity Only	0.2
Plate 15	G08	77206_0932	AGCTTTCTCCTTTTCAGCCACTAGCTTCAGCTTCCCGATATCCGACGGTAGTGTNNNNNNNNCATTGTTAGGCTTTTTGGTG	200 picomole Ultramer DNA Plate Oligo	Standard Desalting	Quantity Only	0.2
Plate 15	G09	77241_0933	TTACTCCGTTCTCAGCCAGAACCCTTCAGCTTCCCGATATCCGACGGTAGTGTNNNNNNNNTTCGATTCTTCGAGAGTTCG	200 picomole Ultramer DNA Plate Oligo	Standard Desalting	Quantity Only	0.2
Plate 15	G10	77261_0934	TGAAACCCTCTCTCGCGAAAAGAGTATTCCTTCAGCTTCCCGATATCCGACGGTAGTGTNNNNNNNNCACTAACAACAAGAGA	200 picomole Ultramer DNA Plate Oligo	Standard Desalting	Quantity Only	0.2
Plate 15	G11	77364_0936	GCGGTATGAACAAAACAACACGGAGGCCTTCAGCTTCCCGATATCCGACGGTAGTGTNNNNNNNNGTTGGGAGATTTCGATGG	200 picomole Ultramer DNA Plate Oligo	Standard Desalting	Quantity Only	0.2
Plate 15	G12	77386_0937	CACCACAGAAGTTAGCTTAAGAGTCAAGGCTTCAGCTTCCCGATATCCGACGGTAGTGTNNNNNNNNAGAACAATCATCCAAG	200 picomole Ultramer DNA Plate Oligo	Standard Desalting	Quantity Only	0.2
Plate 15	H01	77418_0938	GTCGTATCTCACGGCGGCTGTAGTCACCACTTCAGCTTCCCGATATCCGACGGTAGTGTNNNNNNNNTGGTTTTGGATTTGGT	200 picomole Ultramer DNA Plate Oligo	Standard Desalting	Quantity Only	0.2
Plate 15	H02	77437_0939	CCCTGCAAGATTTTGTGGTAGTGGCACTTCTTCAGCTTCCCGATATCCGACGGTAGTGTNNNNNNNNAGCTTTTCTTCGCCTT	200 picomole Ultramer DNA Plate Oligo	Standard Desalting	Quantity Only	0.2
Plate 15	H03	77466_0940	TATTGGTAGTGTCATGATTCCCTACATGGCTTCAGCTTCCCGATATCCGACGGTAGTGTNNNNNNNNGAACTACAAACATAAC	200 picomole Ultramer DNA Plate Oligo	Standard Desalting	Quantity Only	0.2
Plate 15	H04	77555_0941	AAACTTGGACAAACCAACCAGCTGAAATCCTTCAGCTTCCCGATATCCGACGGTAGTGTNNNNNNNNCTGAATAAGAGATCTC	200 picomole Ultramer DNA Plate Oligo	Standard Desalting	Quantity Only	0.2
Plate 15	H05	77672_0942	GTTATGGATGTTGTCGGAGTGAGAGTGCTTCAGCTTCCCGATATCCGACGGTAGTGTNNNNNNNNAATCGTGATGGGAGTG	200 picomole Ultramer DNA Plate Oligo	Standard Desalting	Quantity Only	0.2
Plate 15	H06	77741_0161	GCTTAGAAGTGAAATTACTTGCTTAGAAGCTTCAGCTTCCCGATATCCGACGGTAGTGTNNNNNNNNCGACAATATATCAAAG	200 picomole Ultramer DNA Plate Oligo	Standard Desalting	Quantity Only	0.2
Plate 15	H07	77834_0944	GGAAAGAGCCATTCCATTGATGGAACTTCAGCTTCCCGATATCCGACGGTAGTGTNNNNNNNNGATGATATCGGAGGAGTAG	200 picomole Ultramer DNA Plate Oligo	Standard Desalting	Quantity Only	0.2
Plate 15	H08	77842_0945	GAACGGCGGATTCGGTGTAAAACGCGTAGCTTCAGCTTCCCGATATCCGACGGTAGTGTNNNNNNNNTCAGATAGAAGAAAAC	200 picomole Ultramer DNA Plate Oligo	Standard Desalting	Quantity Only	0.2
Plate 15	H09	77893_0946	GACTAAGGCGATTGGTTGACAAAATGACCTTCAGCTTCCCGATATCCGACGGTAGTGTNNNNNNNNGAGACCAGTGGCCTAAG	200 picomole Ultramer DNA Plate Oligo	Standard Desalting	Quantity Only	0.2
Plate 15	H10	77933_0947	GCGCTTCTCCCATATTAAAGTGATTTTGCTTCAGCTTCCCGATATCCGACGGTAGTGTNNNNNNNNCTTATAAATCGAGATAG	200 picomole Ultramer DNA Plate Oligo	Standard Desalting	Quantity Only	0.2
Plate 15	H11	77937_0948	CTAGCTAGCTAATGTAACAGCAAGCTTCAGCTTCCCGATATCCGACGGTAGTGTNNNNNNNNCGGGGTTGGTGGTAAC	200 picomole Ultramer DNA Plate Oligo	Standard Desalting	Quantity Only	0.2
Plate 15	H12	78024_0949	CCTTAAGCAGCTACCTAAATCCAAGCCTTCAGCTTCCCGATATCCGACGGTAGTGTNNNNNNNNCACGAGAAATTTCAAACAC	200 picomole Ultramer DNA Plate Oligo	Standard Desalting	Quantity Only	0.2
Plate 16	A01	78037_0950	GAGATTGACGCAGGCGCAGCGTTCGAGGGCTTCAGCTTCCCGATATCCGACGGTAGTGTNNNNNNNNAAAAGAAACAAACGAG	200 picomole Ultramer DNA Plate Oligo	Standard Desalting	Quantity Only	0.2
Plate 16	A02	78045_0951	CGAGTGGGAATCTTTGTCGTACTGACTTCAGCTTCCCGATATCCGACGGTAGTGTNNNNNNNNTGGATGAAGAGAAAGAG	200 picomole Ultramer DNA Plate Oligo	Standard Desalting	Quantity Only	0.2
Plate 16	A03	78123_0952	GTTGGGCCCATATTCTTGGAGACGTGTCTTCAGCTTCCCGATATCCGACGGTAGTGTNNNNNNNNCACTATATATGATCAGG	200 picomole Ultramer DNA Plate Oligo	Standard Desalting	Quantity Only	0.2
Plate 16	A04	78192_0953	GGACTTCGTGTGGTCCGCTTCCTTCAGCTTCCCGATATCCGACGGTAGTGTNNNNNNNNGGTGGAGTCTTTGGACAGAGAG	200 picomole Ultramer DNA Plate Oligo	Standard Desalting	Quantity Only	0.2
Plate 16	A05	78193_0954	GAGAGAGATAAGGGACAGAGGAGAAGGCTTCAGCTTCCCGATATCCGACGGTAGTGTNNNNNNNNGGCGTACAATGCGGAG	200 picomole Ultramer DNA Plate Oligo	Standard Desalting	Quantity Only	0.2
Plate 16	A06	78280_0955	GCTACTGAAGGAAATGTTGGCTTCAAGCTTCAGCTTCCCGATATCCGACGGTAGTGTNNNNNNNNAAACAAGAACACAAAA	200 picomole Ultramer DNA Plate Oligo	Standard Desalting	Quantity Only	0.2
Plate 16	A07	78398_0956	GTACATTTGCTCTCTCTGTTGGTGCTGCTTCAGCTTCCCGATATCCGACGGTAGTGTNNNNNNNNGGCTGTTATGGCTGTT	200 picomole Ultramer DNA Plate Oligo	Standard Desalting	Quantity Only	0.2
Plate 16	A08	78490_0957	CGCCGCCGAGTCATCTCTTGATCTTCAGCTTCCCGATATCCGACGGTAGTGTNNNNNNNNCGATTCGGTCGTTGTTTCTTG	200 picomole Ultramer DNA Plate Oligo	Standard Desalting	Quantity Only	0.2
Plate 16	A09	78506_0958	GGAACCCATGACCGATAGAGATCGATGCTTCAGCTTCCCGATATCCGACGGTAGTGTNNNNNNNNCATCAAAGAAGAGGGA	200 picomole Ultramer DNA Plate Oligo	Standard Desalting	Quantity Only	0.2
Plate 16	A10	78534_0959	TCCTGAAACTCCAATAACACCCCTTCAGCTTCCCGATATCCGACGGTAGTGTNNNNNNNNTGTCATTACATGATAGGGAGCTG	200 picomole Ultramer DNA Plate Oligo	Standard Desalting	Quantity Only	0.2
Plate 16	A11	78569_0960	GTGTTTTGTGTTTGCAGAATCTAGTAGCTTCAGCTTCCCGATATCCGACGGTAGTGTNNNNNNNNGAGGAAATGGACTGGG	200 picomole Ultramer DNA Plate Oligo	Standard Desalting	Quantity Only	0.2
Plate 16	A12	78596_0162	GCTGAAGACTTTCTCGATGGTAGCGCTTCAGCTTCCCGATATCCGACGGTAGTGTNNNNNNNNAAGAAGAAGAAGAAGAGAAT	200 picomole Ultramer DNA Plate Oligo	Standard Desalting	Quantity Only	0.2
Plate 16	B01	78651_0961	TCTCGGGAGGTTTCGGACATCGTGTTCTTCAGCTTCCCGATATCCGACGGTAGTGTNNNNNNNNAACCAAAACCTGAACACC	200 picomole Ultramer DNA Plate Oligo	Standard Desalting	Quantity Only	0.2
Plate 16	B02	78652_0962	GTGCTTTTTGCCCTCCTTTCTTGCTTCAGCTTCCCGATATCCGACGGTAGTGTNNNNNNNNAACACAATAACTAAAGAAACAC	200 picomole Ultramer DNA Plate Oligo	Standard Desalting	Quantity Only	0.2
Plate 16	B03	78736_0163	GCGATCTGTAGCTGCAATTGTTTTCTGCTTCAGCTTCCCGATATCCGACGGTAGTGTNNNNNNNNCAACACAATTCTTCCAAA	200 picomole Ultramer DNA Plate Oligo	Standard Desalting	Quantity Only	0.2
Plate 16	B04	78748_0963	GACTTCTCACGCTGCATCATCCTCTGCTTCAGCTTCCCGATATCCGACGGTAGTGTNNNNNNNNCATCACGTACTATACACG	200 picomole Ultramer DNA Plate Oligo	Standard Desalting	Quantity Only	0.2
Plate 16	B05	78815_0964	GAGAGAGAGGGAGGGTTAGAGAGTCCTTCAGCTTCCCGATATCCGACGGTAGTGTNNNNNNNNAAAGGGAGCCTTGGCA	200 picomole Ultramer DNA Plate Oligo	Standard Desalting	Quantity Only	0.2
Plate 16	B06	78861_0965	TTCCTCACTACTCGCACCTGCCTTCAGCTTCCCGATATCCGACGGTAGTGTNNNNNNNNTCGAGAATAGAGTTACACGGCG	200 picomole Ultramer DNA Plate Oligo	Standard Desalting	Quantity Only	0.2
Plate 16	B07	78865_0164_SNP_a	GGATAGGATAAGGTGCGAGGCTATTCCTTCAGCTTCCCGATATCCGACGGTAGTGTNNNNNNNNAAAAGAAGAGAGAAGGG	200 picomole Ultramer DNA Plate Oligo	Standard Desalting	Quantity Only	0.2
Plate 16	B08	78892_0966	GCTTTGTGAGGATGTGGGCCGTTCCTTCAGCTTCCCGATATCCGACGGTAGTGTNNNNNNNNCCAACCAATTATATGTGAG	200 picomole Ultramer DNA Plate Oligo	Standard Desalting	Quantity Only	0.2
Plate 16	B09	78919_0967	GCCGTTAGGTCAAGCTTTTTGGGCTGTCTTCAGCTTCCCGATATCCGACGGTAGTGTNNNNNNNNGTAAAGATCAAACCTCA	200 picomole Ultramer DNA Plate Oligo	Standard Desalting	Quantity Only	0.2
Plate 16	B10	78922_0968	GACTTTCTCCGAGTGTGCAAGCTCGTGCTTCAGCTTCCCGATATCCGACGGTAGTGTNNNNNNNNGCAAGATTTTGTGGTG	200 picomole Ultramer DNA Plate Oligo	Standard Desalting	Quantity Only	0.2
Plate 16	B11	78939_0969	GCTCCTATCGAGAACAAGTTGCCTTGTAGCTTCAGCTTCCCGATATCCGACGGTAGTGTNNNNNNNNTGGTGGCGGTGGTGGT	200 picomole Ultramer DNA Plate Oligo	Standard Desalting	Quantity Only	0.2
Plate 16	B12	78955_0970	CGACAGCTGTGATTTTGCATATTTTGCTGCTTCAGCTTCCCGATATCCGACGGTAGTGTNNNNNNNNCAAACAAAGAACCACA	200 picomole Ultramer DNA Plate Oligo	Standard Desalting	Quantity Only	0.2
Plate 16	C01	78980_0971	GCGTAATTGCTGGGATCAAGAGGACCTTCAGCTTCCCGATATCCGACGGTAGTGTNNNNNNNNTCTCGTCGTTTCTTGTGAGG	200 picomole Ultramer DNA Plate Oligo	Standard Desalting	Quantity Only	0.2
Plate 16	C02	79017_0972_SNP_a	GCTAATTTGTCTCGTGACGTGACTTGTCCCTTCAGCTTCCCGATATCCGACGGTAGTGTNNNNNNNNCAGAGAGAAGGAATAA	200 picomole Ultramer DNA Plate Oligo	Standard Desalting	Quantity Only	0.2
Plate 16	C03	79025_0973	CAGTTAAGAGCTGAGCTTAGCTAGAGTAGCTTCAGCTTCCCGATATCCGACGGTAGTGTNNNNNNNNGAAGTAAGAACAGTGA	200 picomole Ultramer DNA Plate Oligo	Standard Desalting	Quantity Only	0.2
Plate 16	C04	79059_0974	GTGGATATGGGGATGGGAAGAGGACTTCAGCTTCCCGATATCCGACGGTAGTGTNNNNNNNNGCTAGATTAAAAGGTATGTG	200 picomole Ultramer DNA Plate Oligo	Standard Desalting	Quantity Only	0.2
Plate 16	C05	79102_0975	TCCTCCTCCCTCTCTCTACTTCAGCTTCCCGATATCCGACGGTAGTGTNNNNNNNNGGGTTCTATTGGGTTTTAGCTCTAAAC	200 picomole Ultramer DNA Plate Oligo	Standard Desalting	Quantity Only	0.2
Plate 16	C06	79125_0976	GTTTATTTGTTATCCTCCTTTCGTTTGATCTTCAGCTTCCCGATATCCGACGGTAGTGTNNNNNNNNAAAGGAAAGGAGGATA	200 picomole Ultramer DNA Plate Oligo	Standard Desalting	Quantity Only	0.2
Plate 16	C07	79162_0977	GCGGGAAGGGAGTGGGCATCTTCAGCTTCCCGATATCCGACGGTAGTGTNNNNNNNNGGGAGAGAGATAGAGGGATAG	200 picomole Ultramer DNA Plate Oligo	Standard Desalting	Quantity Only	0.2
Plate 16	C08	79202_0978	GCAATTTCAGTTCCATCTTCAAGGGAACCCTTCAGCTTCCCGATATCCGACGGTAGTGTNNNNNNNNCAACCATAAAACAACA	200 picomole Ultramer DNA Plate Oligo	Standard Desalting	Quantity Only	0.2
Plate 16	C09	79239_0979	CGGTCGTTTTGTCCAACAGAAGAGTCTTCAGCTTCCCGATATCCGACGGTAGTGTNNNNNNNNCTATATAATATAAGCCAAGC	200 picomole Ultramer DNA Plate Oligo	Standard Desalting	Quantity Only	0.2
Plate 16	C10	79241_0980	GTCACATTTGCCTTTGTATTGTTAAGTTCTTCAGCTTCCCGATATCCGACGGTAGTGTNNNNNNNNGTGTGAGTGTGTGTGTG	200 picomole Ultramer DNA Plate Oligo	Standard Desalting	Quantity Only	0.2
Plate 16	C11	79259_0981	TTCAAGCGCTCGTGCCCCCTTCAGCTTCCCGATATCCGACGGTAGTGTNNNNNNNNCTTCTCAGTTTTTGTTTTGCTGTTGT	200 picomole Ultramer DNA Plate Oligo	Standard Desalting	Quantity Only	0.2
Plate 16	C12	79266_0982	GCATTGGACTGGGCTTGTGGTCCTGGACTTCAGCTTCCCGATATCCGACGGTAGTGTNNNNNNNNCCAACAAATTCAACCA	200 picomole Ultramer DNA Plate Oligo	Standard Desalting	Quantity Only	0.2
Plate 16	D01	79280_0983	GCTTGGCTCTCTGTAGTTGGCCTGCTTCAGCTTCCCGATATCCGACGGTAGTGTNNNNNNNNTTCCTCTAGTTTCGTTTCGG	200 picomole Ultramer DNA Plate Oligo	Standard Desalting	Quantity Only	0.2
Plate 16	D02	79318_0984	GTGAGAGGATAGGTTTGGCTTGAGGTGCTTCAGCTTCCCGATATCCGACGGTAGTGTNNNNNNNNCGCCTCTAACGATCCAAA	200 picomole Ultramer DNA Plate Oligo	Standard Desalting	Quantity Only	0.2
Plate 16	D03	79319_0985	TAACTCCCTCACCCCACAATCCCAAGCTTCAGCTTCCCGATATCCGACGGTAGTGTNNNNNNNNCAGATAAATCAAAACCC	200 picomole Ultramer DNA Plate Oligo	Standard Desalting	Quantity Only	0.2
Plate 16	D04	79322_0986_SNP_a	ACTCTATCCATTATTGAATTGTCGACGGTCTTCAGCTTCCCGATATCCGACGGTAGTGTNNNNNNNNTTTAGTGTGGCGTGAG	200 picomole Ultramer DNA Plate Oligo	Standard Desalting	Quantity Only	0.2
Plate 16	D05	79343_0987	GGTGTAGGAAGTGGTCCAACAACAATCGCTTCAGCTTCCCGATATCCGACGGTAGTGTNNNNNNNNCCTAAAACCAAACAAC	200 picomole Ultramer DNA Plate Oligo	Standard Desalting	Quantity Only	0.2
Plate 16	D06	79427_0130	CCAAACAAGTGCATAACGATCCCATGCCTTCAGCTTCCCGATATCCGACGGTAGTGTNNNNNNNNCAAATAGGTAGAGAAAGC	200 picomole Ultramer DNA Plate Oligo	Standard Desalting	Quantity Only	0.2
Plate 16	D07	79445_0989	GGGATTGCTATCAACGGCTTGCTTCGCCTTCAGCTTCCCGATATCCGACGGTAGTGTNNNNNNNNAGGAATAATAGAGGAA	200 picomole Ultramer DNA Plate Oligo	Standard Desalting	Quantity Only	0.2
Plate 16	D08	79476_0990	ACTTGGGCTGATTGGGCCATCATCTTCAGCTTCCCGATATCCGACGGTAGTGTNNNNNNNNAGTATAGACATAATATACAACC	200 picomole Ultramer DNA Plate Oligo	Standard Desalting	Quantity Only	0.2
Plate 16	D09	79482_0991	GCTCGGTCCAAAGTAATTGGAAGGAGACCCTTCAGCTTCCCGATATCCGACGGTAGTGTNNNNNNNNACAACACATTAAGACC	200 picomole Ultramer DNA Plate Oligo	Standard Desalting	Quantity Only	0.2
Plate 16	D10	79485_0992	CTTTTGTGTTGTGTGTTTCTTCTCTCGCTTCAGCTTCCCGATATCCGACGGTAGTGTNNNNNNNNTGGACCGATGGGTTTGG	200 picomole Ultramer DNA Plate Oligo	Standard Desalting	Quantity Only	0.2
Plate 16	D11	79502_0993	GCAAGTTTCATATTGGCAAGGTCTTCCCTTCAGCTTCCCGATATCCGACGGTAGTGTNNNNNNNNCTCATCATACGATCGACT	200 picomole Ultramer DNA Plate Oligo	Standard Desalting	Quantity Only	0.2
Plate 16	D12	79554_0994	GACAAGATATGGATACATGTTTGCTTCTCCTTCAGCTTCCCGATATCCGACGGTAGTGTNNNNNNNNCAAAAATCAAGGGAAG	200 picomole Ultramer DNA Plate Oligo	Standard Desalting	Quantity Only	0.2
Plate 16	E01	79567_0996	GCGAATCTTGAAAGGACAGACCTTGGACTTCAGCTTCCCGATATCCGACGGTAGTGTNNNNNNNNGGCTAAGAAAAAGGGATG	200 picomole Ultramer DNA Plate Oligo	Standard Desalting	Quantity Only	0.2
Plate 16	E02	79598_0997	GCCAAGGAAAAAGAAATTCGATGGCTGCCCTTCAGCTTCCCGATATCCGACGGTAGTGTNNNNNNNNAGTGCATGTGATTAAC	200 picomole Ultramer DNA Plate Oligo	Standard Desalting	Quantity Only	0.2
Plate 16	E03	79603_0998	GCTGTGAGTTTGCAGCGACGTTGGGCTTCAGCTTCCCGATATCCGACGGTAGTGTNNNNNNNNTAGCAAATCGCTGAATG	200 picomole Ultramer DNA Plate Oligo	Standard Desalting	Quantity Only	0.2
Plate 16	E04	79636_0999	GCGGTCACTTTGGTAACGTCATGTGCTTCAGCTTCCCGATATCCGACGGTAGTGTNNNNNNNNACGCAAGAAGAGACTGGG	200 picomole Ultramer DNA Plate Oligo	Standard Desalting	Quantity Only	0.2
Plate 16	E05	79657_1000	CTGCATGTGCTCACTCTCTTCTGTCAGCTTCAGCTTCCCGATATCCGACGGTAGTGTNNNNNNNNACAGACGAGATGATAAG	200 picomole Ultramer DNA Plate Oligo	Standard Desalting	Quantity Only	0.2
Plate 16	E06	79660_1001	GCTTCTTTACCTTTGAGTTGACATTAGAACTTCAGCTTCCCGATATCCGACGGTAGTGTNNNNNNNNAACAGACAGACAAAGC	200 picomole Ultramer DNA Plate Oligo	Standard Desalting	Quantity Only	0.2
Plate 16	E07	79676_1002	CAGAGGCGATTCTTGGAGCATTAGTGTCTTCAGCTTCCCGATATCCGACGGTAGTGTNNNNNNNNGAGCTCGAAAGGAAAAAA	200 picomole Ultramer DNA Plate Oligo	Standard Desalting	Quantity Only	0.2
Plate 16	E08	79724_1003	CTGTGGATTTGTGGGAGAGTAGGGCTTCAGCTTCCCGATATCCGACGGTAGTGTNNNNNNNNCCAAAAGAAACAAAAAAT	200 picomole Ultramer DNA Plate Oligo	Standard Desalting	Quantity Only	0.2
Plate 16	E09	79782_1004	GCCCAGCAGCAAGCGGATCAGCACGGTTCTTCAGCTTCCCGATATCCGACGGTAGTGTNNNNNNNNAGGCAGGACAAGTAAT	200 picomole Ultramer DNA Plate Oligo	Standard Desalting	Quantity Only	0.2
Plate 16	E10	79803_1005	GGTTGGATCGAGAAGAAGATAGTGGATGACTTCAGCTTCCCGATATCCGACGGTAGTGTNNNNNNNNAAGTGAGCAGTGAAAA	200 picomole Ultramer DNA Plate Oligo	Standard Desalting	Quantity Only	0.2
Plate 16	E11	79812_1006	GCTCGCATACAGGGTCTTCAATGGTCGCTTCAGCTTCCCGATATCCGACGGTAGTGTNNNNNNNNGATGATCTGTTGCAGAG	200 picomole Ultramer DNA Plate Oligo	Standard Desalting	Quantity Only	0.2
Plate 16	E12	79815_1007	GAAAACGGCCCATATAAATCCACCAAACGCTTCAGCTTCCCGATATCCGACGGTAGTGTNNNNNNNNTTTGAACACGGAAGGT	200 picomole Ultramer DNA Plate Oligo	Standard Desalting	Quantity Only	0.2
Plate 16	F01	79829_1008	GGGCTCGCTGTGGTCTTCGTTTTTGCTTCAGCTTCCCGATATCCGACGGTAGTGTNNNNNNNNGGATTGAGCACGATCA	200 picomole Ultramer DNA Plate Oligo	Standard Desalting	Quantity Only	0.2
Plate 16	F02	79835_1009	GCAGCTTCGGGAAGGGATGAGGAATGCTTCAGCTTCCCGATATCCGACGGTAGTGTNNNNNNNNCGCCAATGCTTTTAAAGCG	200 picomole Ultramer DNA Plate Oligo	Standard Desalting	Quantity Only	0.2
Plate 16	F03	79841_1010	ACTTTTCAGAATTTAATGAAGACACAAGCTTCAGCTTCCCGATATCCGACGGTAGTGTNNNNNNNNGGACCCTTGTGTGGAGG	200 picomole Ultramer DNA Plate Oligo	Standard Desalting	Quantity Only	0.2
Plate 16	F04	79884_1011	GTTTTGCAGAAACGTATCGGTGAGGCGGCTTCAGCTTCCCGATATCCGACGGTAGTGTNNNNNNNNAAGACGAAGTCGAACC	200 picomole Ultramer DNA Plate Oligo	Standard Desalting	Quantity Only	0.2
Plate 16	F05	79887_1012	TTCTCCAGACTCTTTGGGATTTTTAATGGCTTCAGCTTCCCGATATCCGACGGTAGTGTNNNNNNNNGAGAGATACCTGGAGA	200 picomole Ultramer DNA Plate Oligo	Standard Desalting	Quantity Only	0.2
Plate 16	F06	79914_1013	GGAGTTTAGCTGGAGCTGGAGACCTTCTTCAGCTTCCCGATATCCGACGGTAGTGTNNNNNNNNAGGTCAACGAAGAAGAAGG	200 picomole Ultramer DNA Plate Oligo	Standard Desalting	Quantity Only	0.2
Plate 16	F07	79934_1014	GCCTTTAGCTTATTTGTGTGGCGAAGAGCTTCAGCTTCCCGATATCCGACGGTAGTGTNNNNNNNNGCAACCTTACCGTCTTA	200 picomole Ultramer DNA Plate Oligo	Standard Desalting	Quantity Only	0.2
Plate 16	F08	79944_1015	GCTTGGCATAGTGACAGACACCAACCCTTCAGCTTCCCGATATCCGACGGTAGTGTNNNNNNNNCCACCACACTCAAATAAA	200 picomole Ultramer DNA Plate Oligo	Standard Desalting	Quantity Only	0.2
Plate 16	F09	79963_1016	CACTCTCGGAATCTGGGATTTTGTGTACTTCAGCTTCCCGATATCCGACGGTAGTGTNNNNNNNNAAAAAGTGTCAAAACGAA	200 picomole Ultramer DNA Plate Oligo	Standard Desalting	Quantity Only	0.2
Plate 16	F10	79978_1018	CGATTTATTTTTTGCTTGTGCAGGCAGTCTTCAGCTTCCCGATATCCGACGGTAGTGTNNNNNNNNGGTACGTTGAAGCTGC	200 picomole Ultramer DNA Plate Oligo	Standard Desalting	Quantity Only	0.2
Plate 16	F11	79999_1019	CACTCACCGGAGGATTATAACTTCGCCGCCTTCAGCTTCCCGATATCCGACGGTAGTGTNNNNNNNNGAAAAAAACAAAAAAC	200 picomole Ultramer DNA Plate Oligo	Standard Desalting	Quantity Only	0.2
Plate 16	F12	80005_1020	GTTTATTGCGTTCATGTGACATTTGGAACTTCAGCTTCCCGATATCCGACGGTAGTGTNNNNNNNNGTTGTTCACTTTTGGG	200 picomole Ultramer DNA Plate Oligo	Standard Desalting	Quantity Only	0.2
Plate 16	G01	80006_1021_SNP_a	GGATGTCTGGTGTGGTTGCTCTTGGCTTCAGCTTCCCGATATCCGACGGTAGTGTNNNNNNNNTGGCAATTCCTGAATA	200 picomole Ultramer DNA Plate Oligo	Standard Desalting	Quantity Only	0.2
Plate 16	G02	80032_1022	GATGAGTTTGGTGGGTCATAGCCATTTGCTTCAGCTTCCCGATATCCGACGGTAGTGTNNNNNNNNAGAAACATGAACATGGA	200 picomole Ultramer DNA Plate Oligo	Standard Desalting	Quantity Only	0.2
Plate 16	G03	80050_1023	GCAAGATAAGGCATCGGTGTTAAGCGGCGCTTCAGCTTCCCGATATCCGACGGTAGTGTNNNNNNNNATAGAAAAAAGAGAGC	200 picomole Ultramer DNA Plate Oligo	Standard Desalting	Quantity Only	0.2
Plate 16	G04	80052_1024	GCCTGCTGCTAGTATTCGCCATCCAAAGTCTTCAGCTTCCCGATATCCGACGGTAGTGTNNNNNNNNTTGGATACAGCTGATA	200 picomole Ultramer DNA Plate Oligo	Standard Desalting	Quantity Only	0.2
Plate 16	G05	80075_1027	GTTATATAGATTATCTACGAGGTTGGTGTCTTCAGCTTCCCGATATCCGACGGTAGTGTNNNNNNNNCGAGTTCTGGTTTTGG	200 picomole Ultramer DNA Plate Oligo	Standard Desalting	Quantity Only	0.2
Plate 16	G06	80117_1028	GTTACTATTTCATAAATATTGGCGTGGATCTTCAGCTTCCCGATATCCGACGGTAGTGTNNNNNNNNCGGTGGTTTGAGGGTT	200 picomole Ultramer DNA Plate Oligo	Standard Desalting	Quantity Only	0.2
Plate 16	G07	80128_1029_SNP_a	GCTGCAAGAGACAGAGAACATCGCTCACCTTCAGCTTCCCGATATCCGACGGTAGTGTNNNNNNNNCCAGAGAACTAAAAGT	200 picomole Ultramer DNA Plate Oligo	Standard Desalting	Quantity Only	0.2
Plate 16	G08	80140_1030	TCCGAGGCGATGTGCTGCGGCAATCCTTCAGCTTCCCGATATCCGACGGTAGTGTNNNNNNNNCCAAACAGAGTCATTTCGAA	200 picomole Ultramer DNA Plate Oligo	Standard Desalting	Quantity Only	0.2
Plate 16	G09	80152_1031	GGAGGATATACAGGAGGAAGAGAACGGTCTTCAGCTTCCCGATATCCGACGGTAGTGTNNNNNNNNAGAGCGAGAGAGTGAG	200 picomole Ultramer DNA Plate Oligo	Standard Desalting	Quantity Only	0.2
Plate 16	G10	80162_1032	GCGATGGATCGAGGAGAGTAAAGCGATCGCTTCAGCTTCCCGATATCCGACGGTAGTGTNNNNNNNNAAAACAACTTCGCAAG	200 picomole Ultramer DNA Plate Oligo	Standard Desalting	Quantity Only	0.2
Plate 16	G11	80170_1033	GTGGGGAGAGAGAGACAAGTAAAAAGGCTTCAGCTTCCCGATATCCGACGGTAGTGTNNNNNNNNGTGAAGAAGCTGTGAGAG	200 picomole Ultramer DNA Plate Oligo	Standard Desalting	Quantity Only	0.2
Plate 16	G12	80226_1035	GCTTATTCACTTGGATGGATTAATGATTGCTTCAGCTTCCCGATATCCGACGGTAGTGTNNNNNNNNTTTCCTCTGGTTTGTT	200 picomole Ultramer DNA Plate Oligo	Standard Desalting	Quantity Only	0.2
Plate 16	H01	80264_0165	GCATCTTAGTGGAATTTCATACACCCACCTTCAGCTTCCCGATATCCGACGGTAGTGTNNNNNNNNAAACTTTATACATCAG	200 picomole Ultramer DNA Plate Oligo	Standard Desalting	Quantity Only	0.2
Plate 16	H02	80274_1036	TTCATACTTCTAAACCAACCTTCTCGACCCTTCAGCTTCCCGATATCCGACGGTAGTGTNNNNNNNNTGTCCTAAACCCCTAA	200 picomole Ultramer DNA Plate Oligo	Standard Desalting	Quantity Only	0.2
Plate 16	H03	80312_1037	CTTAATAAAACTGTGGAGATTTGAAGGAGCTTCAGCTTCCCGATATCCGACGGTAGTGTNNNNNNNNGGTGAAAGGGATATGT	200 picomole Ultramer DNA Plate Oligo	Standard Desalting	Quantity Only	0.2
Plate 16	H04	80325_1038	TGGTGAAGTTTTGCTAAAGAGGCTGCCTTCAGCTTCCCGATATCCGACGGTAGTGTNNNNNNNNCGTCAGGGCAGAATTTC	200 picomole Ultramer DNA Plate Oligo	Standard Desalting	Quantity Only	0.2
Plate 16	H05	80386_1039	GTAAGAATGAGAATCGTTAAAGGAAATGGCTTCAGCTTCCCGATATCCGACGGTAGTGTNNNNNNNNGCTTATCAGGAGAGAG	200 picomole Ultramer DNA Plate Oligo	Standard Desalting	Quantity Only	0.2
Plate 16	H06	80396_1040	GATGATGACAGAGTTTCGGATGTGGCTTCAGCTTCCCGATATCCGACGGTAGTGTNNNNNNNNGTGTGGTTTTGATAGGG	200 picomole Ultramer DNA Plate Oligo	Standard Desalting	Quantity Only	0.2
Plate 16	H07	80397_1041	GCTCTCAAGAGACTCTTCTTGAGAAGTTGCTTCAGCTTCCCGATATCCGACGGTAGTGTNNNNNNNNGCCGGATGAGTTGGTA	200 picomole Ultramer DNA Plate Oligo	Standard Desalting	Quantity Only	0.2
Plate 16	H08	80424_1042	GTCTCTTCTTCTCTATCTTTTCTACTCACTTCAGCTTCCCGATATCCGACGGTAGTGTNNNNNNNNTCTTGAATCTGAATTTG	200 picomole Ultramer DNA Plate Oligo	Standard Desalting	Quantity Only	0.2
Plate 16	H09	80450_1043	GTTAGGTAGTGTTGCGTTGTGATGCCTTCAGCTTCCCGATATCCGACGGTAGTGTNNNNNNNNACTCCAAACCAACCAGA	200 picomole Ultramer DNA Plate Oligo	Standard Desalting	Quantity Only	0.2
Plate 16	H10	80467_1044	CGAGAGATTTTGTTGGCCCAATAGAGCTGCTTCAGCTTCCCGATATCCGACGGTAGTGTNNNNNNNNAGAATGAAAATAGAGG	200 picomole Ultramer DNA Plate Oligo	Standard Desalting	Quantity Only	0.2
Plate 16	H11	80580_1045	GCATGAACTATTGGCGCAACTCTTCTCGCCTTCAGCTTCCCGATATCCGACGGTAGTGTNNNNNNNNATGGTGATGGTGGTAG	200 picomole Ultramer DNA Plate Oligo	Standard Desalting	Quantity Only	0.2
Plate 16	H12	80659_1046	CACGAGACCCACTGAGGAGTACTTCTGGCTTCAGCTTCCCGATATCCGACGGTAGTGTNNNNNNNNGAGTTTGAAGGGTCCC	200 picomole Ultramer DNA Plate Oligo	Standard Desalting	Quantity Only	0.2
Plate 17	A01	80663_1047	GAGGGAGCGTATTTATAAGCAACGGCTCCCTTCAGCTTCCCGATATCCGACGGTAGTGTNNNNNNNNATCGAAAGCACATCAG	200 picomole Ultramer DNA Plate Oligo	Standard Desalting	Quantity Only	0.2
Plate 17	A02	80770_1048	GTTTTGTCACCAGGTGGTGGTGCTTCAGCTTCCCGATATCCGACGGTAGTGTNNNNNNNNTGGGTTAAACTGGGCTAGG	200 picomole Ultramer DNA Plate Oligo	Standard Desalting	Quantity Only	0.2
Plate 17	A03	80811_0166	GTGGAAGTGAAAGGAACAACACTTGGCTGCTTCAGCTTCCCGATATCCGACGGTAGTGTNNNNNNNNAACGTGGAAGATGGGA	200 picomole Ultramer DNA Plate Oligo	Standard Desalting	Quantity Only	0.2
Plate 17	A04	80842_1049	GAGGAGGAGGTCAAGGCAGTGGCTTCAGCTTCCCGATATCCGACGGTAGTGTNNNNNNNNGAATGCTACTTCTTCAAGCGTTT	200 picomole Ultramer DNA Plate Oligo	Standard Desalting	Quantity Only	0.2
Plate 17	A05	80854_1051	GCCCACTCGACCGTCGGTGGAAGGCTTCAGCTTCCCGATATCCGACGGTAGTGTNNNNNNNNAAAAGAAACTAGTAGCACA	200 picomole Ultramer DNA Plate Oligo	Standard Desalting	Quantity Only	0.2
Plate 17	A06	80865_1052	CGGTAGGGATCACGAAGTTTTCTCCGGCTTCAGCTTCCCGATATCCGACGGTAGTGTNNNNNNNNAACTTTGGATGAACACGA	200 picomole Ultramer DNA Plate Oligo	Standard Desalting	Quantity Only	0.2
Plate 17	A07	80877_1053	GCTAGTTATTGAAAGGGATTAGTTACAATCTTCAGCTTCCCGATATCCGACGGTAGTGTNNNNNNNNGGAGATGAAGAGGCGT	200 picomole Ultramer DNA Plate Oligo	Standard Desalting	Quantity Only	0.2
Plate 17	A08	80878_1054	GGCTAGTGGTGTATGGCTCTTCAGCTTCCCGATATCCGACGGTAGTGTNNNNNNNNGATAGTGTATTAACCTAGAATTCGT	200 picomole Ultramer DNA Plate Oligo	Standard Desalting	Quantity Only	0.2
Plate 17	A09	80884_1055	CTCAAACTTGGCTGCTCATGTTCCCTTCAGCTTCCCGATATCCGACGGTAGTGTNNNNNNNNGGTTTAGATTCTTTCTTATCC	200 picomole Ultramer DNA Plate Oligo	Standard Desalting	Quantity Only	0.2
Plate 17	A10	80924_1056	CGGACGGGTTTCAACAAGTTGGAGATTCTTCAGCTTCCCGATATCCGACGGTAGTGTNNNNNNNNTAGACATAGAATTGGC	200 picomole Ultramer DNA Plate Oligo	Standard Desalting	Quantity Only	0.2
Plate 17	A11	80940_1057	GAGAGAGAGAGAGAGGCTCGATGGAGTCTTCAGCTTCCCGATATCCGACGGTAGTGTNNNNNNNNGTAAAAACAGAAGGAA	200 picomole Ultramer DNA Plate Oligo	Standard Desalting	Quantity Only	0.2
Plate 17	A12	80985_1058_SNP_a	CGTCGGGACGTACTCCGACGTGCTTCAGCTTCCCGATATCCGACGGTAGTGTNNNNNNNNACACCCAAAACAAAAAAA	200 picomole Ultramer DNA Plate Oligo	Standard Desalting	Quantity Only	0.2
Plate 17	B01	80997_1059	GAATCATCAAAAAATGGCAACTTCAGTTGCTTCAGCTTCCCGATATCCGACGGTAGTGTNNNNNNNNTGGCTTTTTCATCGTG	200 picomole Ultramer DNA Plate Oligo	Standard Desalting	Quantity Only	0.2
Plate 17	B02	81021_1060	ATCTTCAGTCGCCGGAGGTAGGATTCCGCTTCAGCTTCCCGATATCCGACGGTAGTGTNNNNNNNNAATTCTATGTCCCAAGA	200 picomole Ultramer DNA Plate Oligo	Standard Desalting	Quantity Only	0.2
Plate 17	B03	81081_1061	GACGGTCCAAATTCTCTGTAAACTAGTCGCTTCAGCTTCCCGATATCCGACGGTAGTGTNNNNNNNNGTTGGTGTGGAGCCAT	200 picomole Ultramer DNA Plate Oligo	Standard Desalting	Quantity Only	0.2
Plate 17	B04	81155_1062	GATTCCACTTCCTTCGATGCAGATGAAGTCTTCAGCTTCCCGATATCCGACGGTAGTGTNNNNNNNNCAAAGAAATCCCAAAA	200 picomole Ultramer DNA Plate Oligo	Standard Desalting	Quantity Only	0.2
Plate 17	B05	81181_1063	GCGAGGACCATGGTAAGCGAGAACACGCTCTTCAGCTTCCCGATATCCGACGGTAGTGTNNNNNNNNCGGATACAACCAAAAC	200 picomole Ultramer DNA Plate Oligo	Standard Desalting	Quantity Only	0.2
Plate 17	B06	81206_0133	CGTTAAGGAAGAATTCGACACTGGGCTTCAGCTTCCCGATATCCGACGGTAGTGTNNNNNNNNGCACATGATAAGGAAATCC	200 picomole Ultramer DNA Plate Oligo	Standard Desalting	Quantity Only	0.2
Plate 17	B07	81231_1065	CTTTGGAAGCTGTATACAAGGCAAGCTCCTTCAGCTTCCCGATATCCGACGGTAGTGTNNNNNNNNGACACGCAAACAAAGT	200 picomole Ultramer DNA Plate Oligo	Standard Desalting	Quantity Only	0.2
Plate 17	B08	81277_1066	GCTGGCTTTGAGATTTGTGCTGCTTCAGCTTCCCGATATCCGACGGTAGTGTNNNNNNNNAGCTGCTTTCCAATTTATCTCTG	200 picomole Ultramer DNA Plate Oligo	Standard Desalting	Quantity Only	0.2
Plate 17	B09	81412_1067	CTTGTCCTGGTTTGTACCATACTACGTCCTTCAGCTTCCCGATATCCGACGGTAGTGTNNNNNNNNCCTACTAAACTGTTAGA	200 picomole Ultramer DNA Plate Oligo	Standard Desalting	Quantity Only	0.2
Plate 17	B10	81421_1068	GGAATGGAGTGCTTTCGCATTGGGAACCTTCAGCTTCCCGATATCCGACGGTAGTGTNNNNNNNNCGTATGTTACAAGCAAAA	200 picomole Ultramer DNA Plate Oligo	Standard Desalting	Quantity Only	0.2
Plate 17	B11	81450_1069	GCCTTGGGTGGATGCTCAAGAGCTTCAGCTTCCCGATATCCGACGGTAGTGTNNNNNNNNGACAGAAGCAGTTTGTGCATG	200 picomole Ultramer DNA Plate Oligo	Standard Desalting	Quantity Only	0.2
Plate 17	B12	81457_1070	GCTGGAACGATGGAGGTTTGTGAAGTCTTCAGCTTCCCGATATCCGACGGTAGTGTNNNNNNNNAGAGGCCGATATTAGAG	200 picomole Ultramer DNA Plate Oligo	Standard Desalting	Quantity Only	0.2
Plate 17	C01	81458_1071	GATCAAGAAAGTTGGACATTCTCTTCGCTTCAGCTTCCCGATATCCGACGGTAGTGTNNNNNNNNTGGTGGTGCGTCAGAGTT	200 picomole Ultramer DNA Plate Oligo	Standard Desalting	Quantity Only	0.2
Plate 17	C02	81521_1073	GCTCTGGTGGGATCCGTTTGACTCTTCAGCTTCCCGATATCCGACGGTAGTGTNNNNNNNNAAAAGCGCGAAAAAACAAAAA	200 picomole Ultramer DNA Plate Oligo	Standard Desalting	Quantity Only	0.2
Plate 17	C03	81532_1074	GTGGACTCGCCACCACCAAACGTATATCTTCAGCTTCCCGATATCCGACGGTAGTGTNNNNNNNNGTGTATAGAAGTCAGG	200 picomole Ultramer DNA Plate Oligo	Standard Desalting	Quantity Only	0.2
Plate 17	C04	81537_1075	GCTTTGCTTCACCTAAAGAAGTAATCCACTTCAGCTTCCCGATATCCGACGGTAGTGTNNNNNNNNGTGGCTCGTAGGAAAAG	200 picomole Ultramer DNA Plate Oligo	Standard Desalting	Quantity Only	0.2
Plate 17	C05	81538_1076	GGGTCTTTTCAAGGACTCATTGAGCTTCAGCTTCCCGATATCCGACGGTAGTGTNNNNNNNNGGTCATGCGTTGTTGAGTGT	200 picomole Ultramer DNA Plate Oligo	Standard Desalting	Quantity Only	0.2
Plate 17	C06	81543_1077	GGGTGTCTCCCACAGTTATCTTACTGGGCTTCAGCTTCCCGATATCCGACGGTAGTGTNNNNNNNNCGAAATTAAACTGGTCG	200 picomole Ultramer DNA Plate Oligo	Standard Desalting	Quantity Only	0.2
Plate 17	C07	81550_1078	TGGTCACCCACTATGCTTGAGGACTAAGTCTTCAGCTTCCCGATATCCGACGGTAGTGTNNNNNNNNATATGAACCACAAAGA	200 picomole Ultramer DNA Plate Oligo	Standard Desalting	Quantity Only	0.2
Plate 17	C08	81559_1079	CGCGACAATTGTGGAAACTACAACGACTTCAGCTTCCCGATATCCGACGGTAGTGTNNNNNNNNGCGGTTGGTCATAGAT	200 picomole Ultramer DNA Plate Oligo	Standard Desalting	Quantity Only	0.2
Plate 17	C09	81565_1080_SNP_a	ATGGTGTATCGGCGTCGGTGACGGCCTTCAGCTTCCCGATATCCGACGGTAGTGTNNNNNNNNGGTCGTTTGGGAGGTAA	200 picomole Ultramer DNA Plate Oligo	Standard Desalting	Quantity Only	0.2
Plate 17	C10	81607_1081	CTCTCTCTCCCTTGTAGGTTTCCCTTCAGCTTCCCGATATCCGACGGTAGTGTNNNNNNNNATTCTTTCAAATGCAATGATGG	200 picomole Ultramer DNA Plate Oligo	Standard Desalting	Quantity Only	0.2
Plate 17	C11	81650_0135	GCTTTACGGAATTGCTGGTTTTAGTGGCTTCAGCTTCCCGATATCCGACGGTAGTGTNNNNNNNNCTAGATAACACAGATTA	200 picomole Ultramer DNA Plate Oligo	Standard Desalting	Quantity Only	0.2
Plate 17	C12	81686_1083	TCTGGCTGCAATCCCAGTTCTCCATCTTCAGCTTCCCGATATCCGACGGTAGTGTNNNNNNNNGAGAGTTGTCTCTATGTGTG	200 picomole Ultramer DNA Plate Oligo	Standard Desalting	Quantity Only	0.2
Plate 17	D01	81689_1084	GGAGGAGAATGTGCGTTCCTCTAGAGTCGCTTCAGCTTCCCGATATCCGACGGTAGTGTNNNNNNNNACAGAACCCTAAAAAA	200 picomole Ultramer DNA Plate Oligo	Standard Desalting	Quantity Only	0.2
Plate 17	D02	81728_1085	GTGTTTTGTGGTGAAATCGAGCGTGGCTTCAGCTTCCCGATATCCGACGGTAGTGTNNNNNNNNGCATAGGAAGAAGGTA	200 picomole Ultramer DNA Plate Oligo	Standard Desalting	Quantity Only	0.2
Plate 17	D03	81746_1086	GGTGTGGAGAAGTTTTGTCTTGGTTGCCTTCAGCTTCCCGATATCCGACGGTAGTGTNNNNNNNNAGTAGCTATCACCATGCG	200 picomole Ultramer DNA Plate Oligo	Standard Desalting	Quantity Only	0.2
Plate 17	D04	81761_1087	CACCAGTTGAATCCAGATCTTTCACCAACCTTCAGCTTCCCGATATCCGACGGTAGTGTNNNNNNNNGTTTGGTTCTTGGTGG	200 picomole Ultramer DNA Plate Oligo	Standard Desalting	Quantity Only	0.2
Plate 17	D05	81776_1088	GACCATCTGCAAAGACCAGGCTCCATTGCTTCAGCTTCCCGATATCCGACGGTAGTGTNNNNNNNNTACAAGTGAGAGAGAG	200 picomole Ultramer DNA Plate Oligo	Standard Desalting	Quantity Only	0.2
Plate 17	D06	81794_1091	GTTTCAATAGTTTGGCGTGAAGATGGCCGCTTCAGCTTCCCGATATCCGACGGTAGTGTNNNNNNNNTCAATAATCAGCCAAC	200 picomole Ultramer DNA Plate Oligo	Standard Desalting	Quantity Only	0.2
Plate 17	D07	81799_1092	GAGATAGTGAAGATAATAGAGGAAGCAAGCTTCAGCTTCCCGATATCCGACGGTAGTGTNNNNNNNNAACCATGACATAGAGA	200 picomole Ultramer DNA Plate Oligo	Standard Desalting	Quantity Only	0.2
Plate 17	D08	81826_1093	GCTTTTAATCTAGAGAGCAATGGTTCTTTCTTCAGCTTCCCGATATCCGACGGTAGTGTNNNNNNNNTGAGCTTCTTCACTTG	200 picomole Ultramer DNA Plate Oligo	Standard Desalting	Quantity Only	0.2
Plate 17	D09	81861_1094	GTCTTTTACGCGGGAAGGTATTATACGGTCTTCAGCTTCCCGATATCCGACGGTAGTGTNNNNNNNNGCTTCAAACTAAAACA	200 picomole Ultramer DNA Plate Oligo	Standard Desalting	Quantity Only	0.2
Plate 17	D10	81888_1095	CTTTAATGTCAATGCTTGGTGTGAGTCGCCTTCAGCTTCCCGATATCCGACGGTAGTGTNNNNNNNNAGGTCTGGTTGGTTGT	200 picomole Ultramer DNA Plate Oligo	Standard Desalting	Quantity Only	0.2
Plate 17	D11	81903_1096	GGACCTTTGGTGCTGCTCTTGCTTCAGCTTCCCGATATCCGACGGTAGTGTNNNNNNNNTCTCCCATATAATTGTATTGTTGC	200 picomole Ultramer DNA Plate Oligo	Standard Desalting	Quantity Only	0.2
Plate 17	D12	81937_1097	GAGTGAATGAAGCGTCGATTAGAGCAGCTTCAGCTTCCCGATATCCGACGGTAGTGTNNNNNNNNGACAGAAATCGAGAAA	200 picomole Ultramer DNA Plate Oligo	Standard Desalting	Quantity Only	0.2
Plate 17	E01	81997_1098	GCTGACGACAAAATCCCAAAATTTGGCACTTCAGCTTCCCGATATCCGACGGTAGTGTNNNNNNNNTGTTGATTTCCCAGGTG	200 picomole Ultramer DNA Plate Oligo	Standard Desalting	Quantity Only	0.2
Plate 17	E02	82017_1099	GCTCCCAAAGCACGATTCCAAAGCTGTCTTCAGCTTCCCGATATCCGACGGTAGTGTNNNNNNNNAAGAAGAAGAAGAAAAGA	200 picomole Ultramer DNA Plate Oligo	Standard Desalting	Quantity Only	0.2
Plate 17	E03	82055_1100	GCTTTCAAAGAATTGCGTTGGAAGATACTTCAGCTTCCCGATATCCGACGGTAGTGTNNNNNNNNGTTTCTTCGGGTTCCG	200 picomole Ultramer DNA Plate Oligo	Standard Desalting	Quantity Only	0.2
Plate 17	E04	82058_1101	GCTAGTGAGGATCTACGTGATGACCTGCGCTTCAGCTTCCCGATATCCGACGGTAGTGTNNNNNNNNTCGGCGGCAGACAATT	200 picomole Ultramer DNA Plate Oligo	Standard Desalting	Quantity Only	0.2
Plate 17	E05	82078_0168	CGTATTAGTACACACTGAACATTAAACCGCTTCAGCTTCCCGATATCCGACGGTAGTGTNNNNNNNNCCATGAGAGGGAAAGG	200 picomole Ultramer DNA Plate Oligo	Standard Desalting	Quantity Only	0.2
Plate 17	E06	82088_1102	GTGGGGATATATCACTTCTAAAGTTTGCTCTTCAGCTTCCCGATATCCGACGGTAGTGTNNNNNNNNTTATTGAGAGGAATCA	200 picomole Ultramer DNA Plate Oligo	Standard Desalting	Quantity Only	0.2
Plate 17	E07	82112_1103_SNP_a	AGCTCTTTCCTCTCTCTTTCTCTCTCCTTCAGCTTCCCGATATCCGACGGTAGTGTNNNNNNNNATCCCAAACTCCCAGA	200 picomole Ultramer DNA Plate Oligo	Standard Desalting	Quantity Only	0.2
Plate 17	E08	82116_1104_SNP_a	AACTATATTAATGGCCAAGGGCCCAAGTCCTTCAGCTTCCCGATATCCGACGGTAGTGTNNNNNNNNAAAACAATTGTGTCCC	200 picomole Ultramer DNA Plate Oligo	Standard Desalting	Quantity Only	0.2
Plate 17	E09	82178_1105	GCCTTTGGTGCTGGTGCTTCTTCAGCTTCCCGATATCCGACGGTAGTGTNNNNNNNNTGTTCATGATTCCCATCGCTTTACC	200 picomole Ultramer DNA Plate Oligo	Standard Desalting	Quantity Only	0.2
Plate 17	E10	82265_1106	ACCTTTCTCGATGCAGTGATCACTGAGCCCTTCAGCTTCCCGATATCCGACGGTAGTGTNNNNNNNNAAAACAAGAACAACAA	200 picomole Ultramer DNA Plate Oligo	Standard Desalting	Quantity Only	0.2
Plate 17	E11	82296_1107	GCATAGGAGAAATAAATGCTTACTCCGGCCTTCAGCTTCCCGATATCCGACGGTAGTGTNNNNNNNNACACATACACACACAT	200 picomole Ultramer DNA Plate Oligo	Standard Desalting	Quantity Only	0.2
Plate 17	E12	82335_1108	GGTGTTGTGATAAATACACCCATGTTCCCCTTCAGCTTCCCGATATCCGACGGTAGTGTNNNNNNNNTAGAGAGATCGATTGG	200 picomole Ultramer DNA Plate Oligo	Standard Desalting	Quantity Only	0.2
Plate 17	F01	82390_1109	CGGCTATTTTCTTGCTCGATGGGGTGCACTTCAGCTTCCCGATATCCGACGGTAGTGTNNNNNNNNGATATTCAGAGGAAAG	200 picomole Ultramer DNA Plate Oligo	Standard Desalting	Quantity Only	0.2
Plate 17	F02	82418_1110	GATGGTAGAAGTTCCGGAAGGCGTAGAACTTCAGCTTCCCGATATCCGACGGTAGTGTNNNNNNNNGAGCAACTTGCGGGTTT	200 picomole Ultramer DNA Plate Oligo	Standard Desalting	Quantity Only	0.2
Plate 17	F03	82426_1111	CAATATTAAACGGCGTCGATGTCGTGGCTTCAGCTTCCCGATATCCGACGGTAGTGTNNNNNNNNGAGAGACTCCATTGCA	200 picomole Ultramer DNA Plate Oligo	Standard Desalting	Quantity Only	0.2
Plate 17	F04	82429_1112	GGAAGTATGATTCTGGCAAACTCTAGAGGCTTCAGCTTCCCGATATCCGACGGTAGTGTNNNNNNNNACAGAAACATAAAAAC	200 picomole Ultramer DNA Plate Oligo	Standard Desalting	Quantity Only	0.2
Plate 17	F05	82430_1113	GTTTCCTAGGGTTTGATGTTTATATGACTTCAGCTTCCCGATATCCGACGGTAGTGTNNNNNNNNAACGCAAAAACAAAAA	200 picomole Ultramer DNA Plate Oligo	Standard Desalting	Quantity Only	0.2
Plate 17	F06	82443_1114	CTGTGTCTTCTCTCCCTCTGTTCTTCAGCTTCCCGATATCCGACGGTAGTGTNNNNNNNNGGTGCAAAAAAATTCATTTCTCT	200 picomole Ultramer DNA Plate Oligo	Standard Desalting	Quantity Only	0.2
Plate 17	F07	82451_1115	CAACCCCGCAACAACGAGATACCTTCAGCTTCCCGATATCCGACGGTAGTGTNNNNNNNNGGTCTTTTCTCTCAATGTTTTGG	200 picomole Ultramer DNA Plate Oligo	Standard Desalting	Quantity Only	0.2
Plate 17	F08	82459_1116	GCTTTGATTGAAGAAGGCTTTAGTTGTCTTCAGCTTCCCGATATCCGACGGTAGTGTNNNNNNNNCTGATGCTCAGCATTTTC	200 picomole Ultramer DNA Plate Oligo	Standard Desalting	Quantity Only	0.2
Plate 17	F09	82516_1117	TTGATCCTCCTTCCATCACTCCCTTCAGCTTCCCGATATCCGACGGTAGTGTNNNNNNNNCTCTTCCTCCTTGCAGTTCC	200 picomole Ultramer DNA Plate Oligo	Standard Desalting	Quantity Only	0.2
Plate 17	F10	82624_1118	GAGATACAAAAGGCCAAATTAAGTCGGCCTTCAGCTTCCCGATATCCGACGGTAGTGTNNNNNNNNGTGTTTGTGGAAGTCGG	200 picomole Ultramer DNA Plate Oligo	Standard Desalting	Quantity Only	0.2
Plate 17	F11	82673_1119	GAGGTGTCACTTTCTGATTGATCGAGAAGCTTCAGCTTCCCGATATCCGACGGTAGTGTNNNNNNNNTGGACGGAGGGAACTG	200 picomole Ultramer DNA Plate Oligo	Standard Desalting	Quantity Only	0.2
Plate 17	F12	82680_1120	CTCTACTGATCTACAAATCCCACCCGTCCTTCAGCTTCCCGATATCCGACGGTAGTGTNNNNNNNNACAATACGAAAGAGAAA	200 picomole Ultramer DNA Plate Oligo	Standard Desalting	Quantity Only	0.2
Plate 17	G01	82748_1121	TTATTCTTCGCTCCAAAGATTCTCTTCCTTCAGCTTCCCGATATCCGACGGTAGTGTNNNNNNNNAGGAAAACAATGAAATTG	200 picomole Ultramer DNA Plate Oligo	Standard Desalting	Quantity Only	0.2
Plate 17	G02	82777_1122	GAGAAGGAAGACTTGATGAAAGAGAGAGCTTCAGCTTCCCGATATCCGACGGTAGTGTNNNNNNNNAAGAGATTGAGGTGACG	200 picomole Ultramer DNA Plate Oligo	Standard Desalting	Quantity Only	0.2
Plate 17	G03	82824_1123_SNP_a	GGGTCGATAAGGTCTTTTTCCGTTTCCCTTCAGCTTCCCGATATCCGACGGTAGTGTNNNNNNNNCAAAGACAACAACTTTGG	200 picomole Ultramer DNA Plate Oligo	Standard Desalting	Quantity Only	0.2
Plate 17	G04	82886_1124	GTCGAGGCTCTAAACTGAACGGAATGAAGCTTCAGCTTCCCGATATCCGACGGTAGTGTNNNNNNNNTGCGGGTCGAAATCGT	200 picomole Ultramer DNA Plate Oligo	Standard Desalting	Quantity Only	0.2
Plate 17	G05	82896_1126	GATTGTCGCTCTACTGGTGGTAGTCTTCAGCTTCCCGATATCCGACGGTAGTGTNNNNNNNNCGGTAAGGAATGTCATGTCT	200 picomole Ultramer DNA Plate Oligo	Standard Desalting	Quantity Only	0.2
Plate 17	G06	82895_1125	GTTGAATTATGAGACTGGAATTTAATAAGCTTCAGCTTCCCGATATCCGACGGTAGTGTNNNNNNNNCATGTTGTTGTTGTTG	200 picomole Ultramer DNA Plate Oligo	Standard Desalting	Quantity Only	0.2
Plate 17	G07	82921_1127	CACCCAAGCGCAGAGATAATCGGTGAAGGCTTCAGCTTCCCGATATCCGACGGTAGTGTNNNNNNNNCAGCACTAAAAAAGAG	200 picomole Ultramer DNA Plate Oligo	Standard Desalting	Quantity Only	0.2
Plate 17	G08	82950_1128	CTTTTGGTACCTATAATTCCTCTTGCCTTCAGCTTCCCGATATCCGACGGTAGTGTNNNNNNNNTCCATTCTTTCAGTTCTCC	200 picomole Ultramer DNA Plate Oligo	Standard Desalting	Quantity Only	0.2
Plate 17	G09	82959_1129	TTGGTTCGTGTCTCATGTCCTTCCGTCTTCAGCTTCCCGATATCCGACGGTAGTGTNNNNNNNNGGAAGAGGATTTGGCGGTG	200 picomole Ultramer DNA Plate Oligo	Standard Desalting	Quantity Only	0.2
Plate 17	G10	83050_0169	GGGATAAGATTTGGAGTGTACCATTGGCTTCAGCTTCCCGATATCCGACGGTAGTGTNNNNNNNNGCTGACTGTGGGCCAA	200 picomole Ultramer DNA Plate Oligo	Standard Desalting	Quantity Only	0.2
Plate 17	G11	83069_1130	GTGGTGGTTTCTGGCGAAGCCTTTCTCACTTCAGCTTCCCGATATCCGACGGTAGTGTNNNNNNNNGGAGTTTGTAGAGAGTG	200 picomole Ultramer DNA Plate Oligo	Standard Desalting	Quantity Only	0.2
Plate 17	G12	83070_1131	GTAATTAGGGTTTCATGTGAGGCCAGCTTCAGCTTCCCGATATCCGACGGTAGTGTNNNNNNNNGGATATGGAATATAGCTGG	200 picomole Ultramer DNA Plate Oligo	Standard Desalting	Quantity Only	0.2
Plate 17	H01	83137_1132	TGGCCACCGCGATACCTCTCTTCGCCTCTCTTCAGCTTCCCGATATCCGACGGTAGTGTNNNNNNNNTTTGTGGCCTTGTGGG	200 picomole Ultramer DNA Plate Oligo	Standard Desalting	Quantity Only	0.2
Plate 17	H02	83142_1133	GCGGTGCCTAGTATGTCAGTATCGCCGCCTTCAGCTTCCCGATATCCGACGGTAGTGTNNNNNNNNACCTAACTTTTCACATA	200 picomole Ultramer DNA Plate Oligo	Standard Desalting	Quantity Only	0.2
Plate 17	H03	83235_1134	GCTGGTGTGGTGGCATCGGGCTTCAGCTTCCCGATATCCGACGGTAGTGTNNNNNNNNGTAGAAACGGTTTCGTGTCC	200 picomole Ultramer DNA Plate Oligo	Standard Desalting	Quantity Only	0.2
Plate 17	H04	83239_1135	GCATGAGTTCACCGAGTCCCTTGGTGGTCTTCAGCTTCCCGATATCCGACGGTAGTGTNNNNNNNNGCAGTTTCCATTTCCAA	200 picomole Ultramer DNA Plate Oligo	Standard Desalting	Quantity Only	0.2
Plate 17	H05	83252_1137	GCAGCATAGCAATGGGTGCTTTCTCTTCAGCTTCCCGATATCCGACGGTAGTGTNNNNNNNNTCATCGTCTCCTTCCTCCTCT	200 picomole Ultramer DNA Plate Oligo	Standard Desalting	Quantity Only	0.2
Plate 17	H06	83309_1138	GATGGAGAGGTCTCAGTGGTAGAAGCTTCAGCTTCCCGATATCCGACGGTAGTGTNNNNNNNNGGAGAGAAATTAGAGAGC	200 picomole Ultramer DNA Plate Oligo	Standard Desalting	Quantity Only	0.2
Plate 17	H07	83323_1139	GTTAGGTCTGTGATGTGCATGGCTGCTTCAGCTTCCCGATATCCGACGGTAGTGTNNNNNNNNCTTTGCAGGGATGGCA	200 picomole Ultramer DNA Plate Oligo	Standard Desalting	Quantity Only	0.2
Plate 17	H08	83334_1140	TTAACCTATTGAAAATATATAAACCAGCCCTTCAGCTTCCCGATATCCGACGGTAGTGTNNNNNNNNACCTCTGGTTTAAGAA	200 picomole Ultramer DNA Plate Oligo	Standard Desalting	Quantity Only	0.2
Plate 17	H09	83458_1141	GTGAAGGATACTCAAGGAATTCGCCATGACTTCAGCTTCCCGATATCCGACGGTAGTGTNNNNNNNNCCTGGAAGTAACGTTG	200 picomole Ultramer DNA Plate Oligo	Standard Desalting	Quantity Only	0.2
Plate 17	H10	83487_1142	GGAGGTGGTGGAGGAGGTGGAGGTCTTCAGCTTCCCGATATCCGACGGTAGTGTNNNNNNNNGGGCTAAAAGGAGGAG	200 picomole Ultramer DNA Plate Oligo	Standard Desalting	Quantity Only	0.2
Plate 17	H11	83492_1143	GCGCCAGAGATCTCGACAGGGGACATTCTTCAGCTTCCCGATATCCGACGGTAGTGTNNNNNNNNGGAGGAGGAGGTGGCGG	200 picomole Ultramer DNA Plate Oligo	Standard Desalting	Quantity Only	0.2
Plate 17	H12	83522_1144	GCGCGTGAGTGTGTGTCAGCTTCAGCTTCCCGATATCCGACGGTAGTGTNNNNNNNNGGCGTCGTAGCTTAGCGCGGAGGG	200 picomole Ultramer DNA Plate Oligo	Standard Desalting	Quantity Only	0.2
Plate 18	A01	83527_1145	CCTCCAATCATTCGTGAAGCGACCCTTCAGCTTCCCGATATCCGACGGTAGTGTNNNNNNNNGGAGTGTTCATAGGATTGTCT	200 picomole Ultramer DNA Plate Oligo	Standard Desalting	Quantity Only	0.2
Plate 18	A02	83557_1146	GCTCCAAGGTGAGCTTTTGCTCGTCTTCAGCTTCCCGATATCCGACGGTAGTGTNNNNNNNNCCCTTGCTTTGTTTTCTCAAC	200 picomole Ultramer DNA Plate Oligo	Standard Desalting	Quantity Only	0.2
Plate 18	A03	83595_1147	GCTTGGGTCTCTTGAGATGTACCTTCAGCTTCCCGATATCCGACGGTAGTGTNNNNNNNNTCTGTTTTAATTGTGGAAACGTA	200 picomole Ultramer DNA Plate Oligo	Standard Desalting	Quantity Only	0.2
Plate 18	A04	83637_1148	CCACATCTGCACTCCGGTTGGGCTCTTCAGCTTCCCGATATCCGACGGTAGTGTNNNNNNNNGCTTTATGCGGTTCACGCGT	200 picomole Ultramer DNA Plate Oligo	Standard Desalting	Quantity Only	0.2
Plate 18	A05	83643_1149	GATTTGAGAGGAAGCTAGGCTGGTGGCTTCAGCTTCCCGATATCCGACGGTAGTGTNNNNNNNNAACGGCGTTAAGAGGT	200 picomole Ultramer DNA Plate Oligo	Standard Desalting	Quantity Only	0.2
Plate 18	A06	83657_1150	GTCACAGCCGATGATGTTGATTTATACCCTTCAGCTTCCCGATATCCGACGGTAGTGTNNNNNNNNGTTATGTATGGCGATAC	200 picomole Ultramer DNA Plate Oligo	Standard Desalting	Quantity Only	0.2
Plate 18	A07	83682_0170	GTGATGTCGTGAATGCTTGATCGCCTTCAGCTTCCCGATATCCGACGGTAGTGTNNNNNNNNGGTGGTGCTTGAGAGACGG	200 picomole Ultramer DNA Plate Oligo	Standard Desalting	Quantity Only	0.2
Plate 18	A08	83683_1151	TAAGCAACAGTTTTCACAGCTCAAGTCCCTTCAGCTTCCCGATATCCGACGGTAGTGTNNNNNNNNAGGGATTGCAGCAACT	200 picomole Ultramer DNA Plate Oligo	Standard Desalting	Quantity Only	0.2
Plate 18	A09	83692_1152	CTGAATTGCCAATTTCAGCCTTTCAAGGCTTCAGCTTCCCGATATCCGACGGTAGTGTNNNNNNNNGTTGTTTGGGTAACACG	200 picomole Ultramer DNA Plate Oligo	Standard Desalting	Quantity Only	0.2
Plate 18	A10	83706_1153	CTCCGCCGCAAGCGACAGCTCTTCAGCTTCCCGATATCCGACGGTAGTGTNNNNNNNNCAATTCTTCTCCCTCTACTTTTATT	200 picomole Ultramer DNA Plate Oligo	Standard Desalting	Quantity Only	0.2
Plate 18	A11	83714_1154	AGGAGACTCTTAAACACAAAACAACACCTTCAGCTTCCCGATATCCGACGGTAGTGTNNNNNNNNAACAAGGAAACACAAA	200 picomole Ultramer DNA Plate Oligo	Standard Desalting	Quantity Only	0.2
Plate 18	A12	83749_1155	AGAAGAGTCTCTCTTGAGTCTTGCCCCTTCAGCTTCCCGATATCCGACGGTAGTGTNNNNNNNNTCAAAGCCTGTGACAT	200 picomole Ultramer DNA Plate Oligo	Standard Desalting	Quantity Only	0.2
Plate 18	B01	83764_1156	CAGATGCTATCGTGCGCACTGCTTCAGCTTCCCGATATCCGACGGTAGTGTNNNNNNNNTGGGATTCGAGGCATTGCTTTG	200 picomole Ultramer DNA Plate Oligo	Standard Desalting	Quantity Only	0.2
Plate 18	B02	83765_1157	CGTCGGAGATGGAGAAGGTAAGACCAGAGCTTCAGCTTCCCGATATCCGACGGTAGTGTNNNNNNNNCGTCTAAGCAAGTCAA	200 picomole Ultramer DNA Plate Oligo	Standard Desalting	Quantity Only	0.2
Plate 18	B03	83816_1159	GTTGGTGTTTCCTTGCCAGTAGCTTCAGCTTCCCGATATCCGACGGTAGTGTNNNNNNNNCCTTGGTTTCCTTGTACCGTTGG	200 picomole Ultramer DNA Plate Oligo	Standard Desalting	Quantity Only	0.2
Plate 18	B04	83936_0042	CGACATTATCCCCAAGACAAAATGGGAACTTCAGCTTCCCGATATCCGACGGTAGTGTNNNNNNNNCGAAGTAACTTACTTTC	200 picomole Ultramer DNA Plate Oligo	Standard Desalting	Quantity Only	0.2
Plate 18	B05	83946_1160	GAGGATAGGTTACACAAAGAGAAGGATAGCTTCAGCTTCCCGATATCCGACGGTAGTGTNNNNNNNNTAAACAAGGAGGGAGT	200 picomole Ultramer DNA Plate Oligo	Standard Desalting	Quantity Only	0.2
Plate 18	B06	83959_1161	GCATTTTGGTTGTTGGTAGTTTGGCTTCAGCTTCCCGATATCCGACGGTAGTGTNNNNNNNNGTGTGTCCAATGTCCATG	200 picomole Ultramer DNA Plate Oligo	Standard Desalting	Quantity Only	0.2
Plate 18	B07	83974_1162	GCAGCTAGTGATCGTTAACCCGAAATGGCTTCAGCTTCCCGATATCCGACGGTAGTGTNNNNNNNNGGTGTTGAGGTAATTA	200 picomole Ultramer DNA Plate Oligo	Standard Desalting	Quantity Only	0.2
Plate 18	B08	83988_1163	CTCTGGTTGCTGACCTTCGATAGCCTTCAGCTTCCCGATATCCGACGGTAGTGTNNNNNNNNGGAAAACTCTCTTGTACATGA	200 picomole Ultramer DNA Plate Oligo	Standard Desalting	Quantity Only	0.2
Plate 18	B09	84022_1164	CTCTTTCTACTGCTTCTGTTTCCTCTTCAGCTTCCCGATATCCGACGGTAGTGTNNNNNNNNCGTTTTACTTGTCTGGTTTTT	200 picomole Ultramer DNA Plate Oligo	Standard Desalting	Quantity Only	0.2
Plate 18	B10	84043_1165_SNP_a	GGAAATGGTGAAGTTGATGATGACCGCTTCAGCTTCCCGATATCCGACGGTAGTGTNNNNNNNNTGGTGGTGGTGGTAAAGAG	200 picomole Ultramer DNA Plate Oligo	Standard Desalting	Quantity Only	0.2
Plate 18	B11	84079_1166	GCATCGGGAGGATTGTAACAGTGTGAGTCTTCAGCTTCCCGATATCCGACGGTAGTGTNNNNNNNNAAAACGAGCGTACACCA	200 picomole Ultramer DNA Plate Oligo	Standard Desalting	Quantity Only	0.2
Plate 18	B12	84092_1167	GGGTCGAAAGCGCGATGCTTCTGATCTTCAGCTTCCCGATATCCGACGGTAGTGTNNNNNNNNGTTGGTGGAAATGGCATG	200 picomole Ultramer DNA Plate Oligo	Standard Desalting	Quantity Only	0.2
Plate 18	C01	84110_1168	GGAGCTACTGGGGAAGAAGTTACTAAGCCTTCAGCTTCCCGATATCCGACGGTAGTGTNNNNNNNNGGTTGAAGTGGAGAAGG	200 picomole Ultramer DNA Plate Oligo	Standard Desalting	Quantity Only	0.2
Plate 18	C02	84113_1169	CGTTTGGAGGGAAACTTTTGAATTTTTGCTTCAGCTTCCCGATATCCGACGGTAGTGTNNNNNNNNAAGGAAAGAGAAAGGT	200 picomole Ultramer DNA Plate Oligo	Standard Desalting	Quantity Only	0.2
Plate 18	C03	84122_1170	GCTGTATGTGTTATGTGTCCAATCTCGTTCTTCAGCTTCCCGATATCCGACGGTAGTGTNNNNNNNNAAAACTCATGCATAGC	200 picomole Ultramer DNA Plate Oligo	Standard Desalting	Quantity Only	0.2
Plate 18	C04	84124_1171	TGTCAAAACGCTTGGTTATGGTTTGTCGGCTTCAGCTTCCCGATATCCGACGGTAGTGTNNNNNNNNCTCTATATAGCGAAAG	200 picomole Ultramer DNA Plate Oligo	Standard Desalting	Quantity Only	0.2
Plate 18	C05	84182_1172	CAACGTTTTGTTTGTTCATCGTAGTCAACTTCAGCTTCCCGATATCCGACGGTAGTGTNNNNNNNNAAAAACCGGAAAACAA	200 picomole Ultramer DNA Plate Oligo	Standard Desalting	Quantity Only	0.2
Plate 18	C06	84198_0172	GAAGAATTGGCAGCTTAAAAGACTGGCCTTCAGCTTCCCGATATCCGACGGTAGTGTNNNNNNNNGGGTGTTGGTGACGATG	200 picomole Ultramer DNA Plate Oligo	Standard Desalting	Quantity Only	0.2
Plate 18	C07	84219_1173	CTCTACATTTACAATACATAGCAGATTGCCTTCAGCTTCCCGATATCCGACGGTAGTGTNNNNNNNNGATTTGGGACATGCGA	200 picomole Ultramer DNA Plate Oligo	Standard Desalting	Quantity Only	0.2
Plate 18	C08	84220_1174	CGATCGGAATCAAGTAAAAAATCGGAACCTTCAGCTTCCCGATATCCGACGGTAGTGTNNNNNNNNAATTACAAATCCGAGTC	200 picomole Ultramer DNA Plate Oligo	Standard Desalting	Quantity Only	0.2
Plate 18	C09	84225_1175	GATGGAGATGGCCGAGATAAATGGGTCCACTTCAGCTTCCCGATATCCGACGGTAGTGTNNNNNNNNACGAGCAGAGAAATTG	200 picomole Ultramer DNA Plate Oligo	Standard Desalting	Quantity Only	0.2
Plate 18	C10	84241_1176	CCATGAAAAAGCCGGGAAAACAGGGCTTCAGCTTCCCGATATCCGACGGTAGTGTNNNNNNNNGTTGAATACGAAGATCTC	200 picomole Ultramer DNA Plate Oligo	Standard Desalting	Quantity Only	0.2
Plate 18	C11	84271_1177	GTGCTCAGAGATCGTTGCTGTATATGCTCCTTCAGCTTCCCGATATCCGACGGTAGTGTNNNNNNNNACATCTGCATCCAAGA	200 picomole Ultramer DNA Plate Oligo	Standard Desalting	Quantity Only	0.2
Plate 18	C12	84283_1178	GTTTATTTGGTGATGGACGTACATGGAGCTTCAGCTTCCCGATATCCGACGGTAGTGTNNNNNNNNGGTAGTGGAGACAACA	200 picomole Ultramer DNA Plate Oligo	Standard Desalting	Quantity Only	0.2
Plate 18	D01	84303_1179_SNP_a	GCTGCTGCTGCTGTGTACTGTATAGGCCTTCAGCTTCCCGATATCCGACGGTAGTGTNNNNNNNNGGAATGTAGAATCAAAC	200 picomole Ultramer DNA Plate Oligo	Standard Desalting	Quantity Only	0.2
Plate 18	D02	84306_1180	GAGAAACGATGCCTCTGAAGCAACCTTGCTTCAGCTTCCCGATATCCGACGGTAGTGTNNNNNNNNAAGAGGAAAAACCGACA	200 picomole Ultramer DNA Plate Oligo	Standard Desalting	Quantity Only	0.2
Plate 18	D03	84315_1181	GTGTTGCCGTTTGTGGAGATCCAGATAACTTCAGCTTCCCGATATCCGACGGTAGTGTNNNNNNNNTGTTTCTAGGTGTGGT	200 picomole Ultramer DNA Plate Oligo	Standard Desalting	Quantity Only	0.2
Plate 18	D04	84333_1182	GGGAGAGAGAGAGTGGGAGTTTTTGTTGACTTCAGCTTCCCGATATCCGACGGTAGTGTNNNNNNNNGAGGCGGTGGAGGAGG	200 picomole Ultramer DNA Plate Oligo	Standard Desalting	Quantity Only	0.2
Plate 18	D05	84356_1184	GCGGCTTTCATCGAAGTTGTGTTGTTTCCTTCAGCTTCCCGATATCCGACGGTAGTGTNNNNNNNNCCTCCATCAAAAGCAAA	200 picomole Ultramer DNA Plate Oligo	Standard Desalting	Quantity Only	0.2
Plate 18	D06	84384_1185	GTGAGAGAGCTTCAAGGCGATGAGGCTTCAGCTTCCCGATATCCGACGGTAGTGTNNNNNNNNAGGCGAAAAAGGAAATGCGA	200 picomole Ultramer DNA Plate Oligo	Standard Desalting	Quantity Only	0.2
Plate 18	D07	84423_1186	GGATAAAATAGCACGTGTGGTTGCCCGGACTTCAGCTTCCCGATATCCGACGGTAGTGTNNNNNNNNCTACGAATCTGACTTT	200 picomole Ultramer DNA Plate Oligo	Standard Desalting	Quantity Only	0.2
Plate 18	D08	84432_1187	GCCGAGCAGCAGAGACCCACGTGCTTCAGCTTCCCGATATCCGACGGTAGTGTNNNNNNNNTGAGGTGGTGTGTTAGAAGTTG	200 picomole Ultramer DNA Plate Oligo	Standard Desalting	Quantity Only	0.2
Plate 18	D09	84466_1188	TTGACTCGTCTTCTTCCTCTCTTCTTCTCCTTCAGCTTCCCGATATCCGACGGTAGTGTNNNNNNNNAACACGAAGAGCATAT	200 picomole Ultramer DNA Plate Oligo	Standard Desalting	Quantity Only	0.2
Plate 18	D10	84471_1189	GAGGAAACATGTCCTGCGTAAAAAACACTCTTCAGCTTCCCGATATCCGACGGTAGTGTNNNNNNNNGTACGTGAAAAAGAGG	200 picomole Ultramer DNA Plate Oligo	Standard Desalting	Quantity Only	0.2
Plate 18	D11	84480_1190	TTACAGGAGTGAAAACAGGGTAATCCTTCAGCTTCCCGATATCCGACGGTAGTGTNNNNNNNNCGAAAAATCAATCAAGTGAG	200 picomole Ultramer DNA Plate Oligo	Standard Desalting	Quantity Only	0.2
Plate 18	D12	84539_1191	GTGCGGTGTAGGAAGAGGGAAACAAGGCTTCAGCTTCCCGATATCCGACGGTAGTGTNNNNNNNNAGGTATTGAACCACAAG	200 picomole Ultramer DNA Plate Oligo	Standard Desalting	Quantity Only	0.2
Plate 18	E01	84574_0173	GTTTTCATGGGGTAGTGTCTCCATTGAGCTTCAGCTTCCCGATATCCGACGGTAGTGTNNNNNNNNTATTCCCACTAAGAAA	200 picomole Ultramer DNA Plate Oligo	Standard Desalting	Quantity Only	0.2
Plate 18	E02	84583_1192	GCTGAAACAGTTTGGATAGTTTTGTTTGCTTCAGCTTCCCGATATCCGACGGTAGTGTNNNNNNNNAGGATAGAGAGAGAGA	200 picomole Ultramer DNA Plate Oligo	Standard Desalting	Quantity Only	0.2
Plate 18	E03	84682_1194	ACAACTGAAAAAAAGCTTAAACCCCCACTTCAGCTTCCCGATATCCGACGGTAGTGTNNNNNNNNGAGAAAAAAATTACAGAG	200 picomole Ultramer DNA Plate Oligo	Standard Desalting	Quantity Only	0.2
Plate 18	E04	84683_1195	CAGGCTCTAAGGTGAAGCCAAGGTTGCCACTTCAGCTTCCCGATATCCGACGGTAGTGTNNNNNNNNCCATACACAAGCAAAA	200 picomole Ultramer DNA Plate Oligo	Standard Desalting	Quantity Only	0.2
Plate 18	E05	84715_1196	GCTCTTGCTCGGTTGGGTGAAATCTGTCTTCAGCTTCCCGATATCCGACGGTAGTGTNNNNNNNNAGAGGCTTTGACAGAAGG	200 picomole Ultramer DNA Plate Oligo	Standard Desalting	Quantity Only	0.2
Plate 18	E06	84719_1197	CGTGTTCCTGTTCAGTCTGATCTTCAGCGCTTCAGCTTCCCGATATCCGACGGTAGTGTNNNNNNNNGTGTAGGATGATTTTG	200 picomole Ultramer DNA Plate Oligo	Standard Desalting	Quantity Only	0.2
Plate 18	E07	84729_1198	GTGAATGATGAAGAGGCAGAGCAATGCTTCAGCTTCCCGATATCCGACGGTAGTGTNNNNNNNNGGAGTGAATGTGCAGATG	200 picomole Ultramer DNA Plate Oligo	Standard Desalting	Quantity Only	0.2
Plate 18	E08	84730_1199	TGCTCTGTGTTGCACTAAGGATCGGTCCTTCAGCTTCCCGATATCCGACGGTAGTGTNNNNNNNNGATTATAGGCTTTGGCTC	200 picomole Ultramer DNA Plate Oligo	Standard Desalting	Quantity Only	0.2
Plate 18	E09	84749_1200	GCGTGCGAGTTTGAAACTTACAAGTAAGCTTCAGCTTCCCGATATCCGACGGTAGTGTNNNNNNNNACATCTATAAATAGACA	200 picomole Ultramer DNA Plate Oligo	Standard Desalting	Quantity Only	0.2
Plate 18	E10	84758_1201	GTGTGCTGTGCGGGATGCGTTTCTTCAGCTTCCCGATATCCGACGGTAGTGTNNNNNNNNGAGGTGTTTGAGGAGGATGAG	200 picomole Ultramer DNA Plate Oligo	Standard Desalting	Quantity Only	0.2
Plate 18	E11	84760_1202	CGTCTGTCGTCTCGTTGAGTTTTAGCTTCTTCAGCTTCCCGATATCCGACGGTAGTGTNNNNNNNNGGTTAAGAACATGGAG	200 picomole Ultramer DNA Plate Oligo	Standard Desalting	Quantity Only	0.2
Plate 18	E12	84844_1204	GATGAGTCGCGAATAAGTGCAAGAGTTGCTTCAGCTTCCCGATATCCGACGGTAGTGTNNNNNNNNAGGGTGAGAAATGCGG	200 picomole Ultramer DNA Plate Oligo	Standard Desalting	Quantity Only	0.2
Plate 18	F01	84996_1205	GCCACGTGGATAATGAGATTGAGCTGCTTCAGCTTCCCGATATCCGACGGTAGTGTNNNNNNNNGTGTGAAAGACATGTG	200 picomole Ultramer DNA Plate Oligo	Standard Desalting	Quantity Only	0.2
Plate 18	F02	85154_1206	GTGTAGATGGATATGCTCCTATGGATTCTTCAGCTTCCCGATATCCGACGGTAGTGTNNNNNNNNATGCTAGTATGGAGGG	200 picomole Ultramer DNA Plate Oligo	Standard Desalting	Quantity Only	0.2
Plate 18	F03	85189_1207	GAGGTGTGCCAACGAGATTAGGGCTTCAGCTTCCCGATATCCGACGGTAGTGTNNNNNNNNGTGGCAGGAGAAAGAAT	200 picomole Ultramer DNA Plate Oligo	Standard Desalting	Quantity Only	0.2
Plate 18	F04	85230_1208	GCAGACTAATAAAAGCGCGTTATGTCCTTCAGCTTCCCGATATCCGACGGTAGTGTNNNNNNNNCATTCTCAAGTATTGTGAA	200 picomole Ultramer DNA Plate Oligo	Standard Desalting	Quantity Only	0.2
Plate 18	F05	85241_1209	GGTGGAAGCTGTAGATTATCAGAGTCTGCTTCAGCTTCCCGATATCCGACGGTAGTGTNNNNNNNNAATCCCTCCCAACAAAA	200 picomole Ultramer DNA Plate Oligo	Standard Desalting	Quantity Only	0.2
Plate 18	F06	85306_1211	GGAACGGTGAGGTCACATTAAGATGCTTCAGCTTCCCGATATCCGACGGTAGTGTNNNNNNNNGCGAGTTTTTCTTATGGTTG	200 picomole Ultramer DNA Plate Oligo	Standard Desalting	Quantity Only	0.2
Plate 18	F07	85347_1212	GCAGATTCGGAGAACCTTGGGTAGCCTTCAGCTTCCCGATATCCGACGGTAGTGTNNNNNNNNCACGACATGGTGGTGC	200 picomole Ultramer DNA Plate Oligo	Standard Desalting	Quantity Only	0.2
Plate 18	F08	85355_1213	GTCGCTGGAATTGAATGAATCGGTGGTCTTCAGCTTCCCGATATCCGACGGTAGTGTNNNNNNNNGCCATGAAAAAGAGGA	200 picomole Ultramer DNA Plate Oligo	Standard Desalting	Quantity Only	0.2
Plate 18	F09	85380_1214	GCAGGATTAGCTTCAAAACAATTAGAAAACTTCAGCTTCCCGATATCCGACGGTAGTGTNNNNNNNNCAATCTAAAAAAAAAA	200 picomole Ultramer DNA Plate Oligo	Standard Desalting	Quantity Only	0.2
Plate 18	F10	85402_1215	ATACCTTGCCGGGAGCGTAAGCTTGAGCACTTCAGCTTCCCGATATCCGACGGTAGTGTNNNNNNNNAGACATCATTCTGGTC	200 picomole Ultramer DNA Plate Oligo	Standard Desalting	Quantity Only	0.2
Plate 18	F11	85414_0140	GAGTTGTGTTTGGGAATTTAGACTCTGTTCTTCAGCTTCCCGATATCCGACGGTAGTGTNNNNNNNNAAAAGAAATTACAAGA	200 picomole Ultramer DNA Plate Oligo	Standard Desalting	Quantity Only	0.2
Plate 18	F12	85496_0141	CGATCCAGAATATGAATGGCCGGGTCACTTCAGCTTCCCGATATCCGACGGTAGTGTNNNNNNNNGAAAATCAACAACGTTGG	200 picomole Ultramer DNA Plate Oligo	Standard Desalting	Quantity Only	0.2
Plate 18	G01	85613_1218	GGAAAGCACTTTATAAAGATGAGGATAGACTTCAGCTTCCCGATATCCGACGGTAGTGTNNNNNNNNGTTTGTCTTTTGACGG	200 picomole Ultramer DNA Plate Oligo	Standard Desalting	Quantity Only	0.2
Plate 18	G02	85675_1219	CTTGGTCTAAGCATCTCCGTACCATCCTTCAGCTTCCCGATATCCGACGGTAGTGTNNNNNNNNCTCTTCCTCTCTTCTCTCT	200 picomole Ultramer DNA Plate Oligo	Standard Desalting	Quantity Only	0.2
Plate 18	G03	85733_1220	GCTTTGGTGGTGGTAATTATGACGAAGGACTTCAGCTTCCCGATATCCGACGGTAGTGTNNNNNNNNAAACCCTAAATAAAAA	200 picomole Ultramer DNA Plate Oligo	Standard Desalting	Quantity Only	0.2
Plate 18	G04	85735_1221_SNP_a	GCCTTTGATGGCGTTTTCTCGAGAGTCTTCAGCTTCCCGATATCCGACGGTAGTGTNNNNNNNNCTGTCGCTTGGTTACACT	200 picomole Ultramer DNA Plate Oligo	Standard Desalting	Quantity Only	0.2
Plate 18	G05	85848_1222	CTCAAACAAACCTCTCCTACGCTTCAGCTTCCCGATATCCGACGGTAGTGTNNNNNNNNGTCTTGTTTGAATCTGTGGGACGG	200 picomole Ultramer DNA Plate Oligo	Standard Desalting	Quantity Only	0.2
Plate 18	G06	85884_1223	CGGAGTATACTTATAACGAGGCTGAAGGGCTTCAGCTTCCCGATATCCGACGGTAGTGTNNNNNNNNGATGTTGAGGACTTGG	200 picomole Ultramer DNA Plate Oligo	Standard Desalting	Quantity Only	0.2
Plate 18	G07	85970_1225_SNP_a	GACGATGATGATGCAAAGTTGCTACTTCGCTTCAGCTTCCCGATATCCGACGGTAGTGTNNNNNNNNAAAGAGAAACAGAGAA	200 picomole Ultramer DNA Plate Oligo	Standard Desalting	Quantity Only	0.2
Plate 18	G08	86012_1226_SNP_a	GTGTGACGGTTATACCCTTTTCCACGTCCTTCAGCTTCCCGATATCCGACGGTAGTGTNNNNNNNNGTTTGGTCTTCAACGTG	200 picomole Ultramer DNA Plate Oligo	Standard Desalting	Quantity Only	0.2
Plate 18	G09	86073_1228	CGAAGACGATGGCGATGATAGGGATCTTCAGCTTCCCGATATCCGACGGTAGTGTNNNNNNNNAGAGTCTATCGACCAGTG	200 picomole Ultramer DNA Plate Oligo	Standard Desalting	Quantity Only	0.2
Plate 18	G10	86080_1229	GGAGGAGAGTGGGAAAGAGAGCTTCAGCTTCCCGATATCCGACGGTAGTGTNNNNNNNNGTGGATGAAAGCGATGGAG	200 picomole Ultramer DNA Plate Oligo	Standard Desalting	Quantity Only	0.2
Plate 18	G11	86090_1230	ACAGAGGACTACCACGACTACGACGGCCTTCAGCTTCCCGATATCCGACGGTAGTGTNNNNNNNNCGAGGAGGGTTTTGTTC	200 picomole Ultramer DNA Plate Oligo	Standard Desalting	Quantity Only	0.2
Plate 18	G12	86094_1231	GCTTCAAGAGTGTGTACAACATTACTGGCTTCAGCTTCCCGATATCCGACGGTAGTGTNNNNNNNNAGGTTGGTGGCAGGTC	200 picomole Ultramer DNA Plate Oligo	Standard Desalting	Quantity Only	0.2
Plate 18	H01	86197_1235	GGAGGTGAATAGACCGGTGGCGGAGGAGCTTCAGCTTCCCGATATCCGACGGTAGTGTNNNNNNNNAGAGGTTAAGGAACGA	200 picomole Ultramer DNA Plate Oligo	Standard Desalting	Quantity Only	0.2
Plate 18	H02	86258_1236	ATCGAGCACATGAGGATTCAACAAACCCCTTCAGCTTCCCGATATCCGACGGTAGTGTNNNNNNNNCATCGTTGTTGTTGTCG	200 picomole Ultramer DNA Plate Oligo	Standard Desalting	Quantity Only	0.2
Plate 18	H03	86275_1237	GTTTCTTGGGCAGTGACACATTTAGGGTCTTCAGCTTCCCGATATCCGACGGTAGTGTNNNNNNNNAGCGTCGACGAAAGAAG	200 picomole Ultramer DNA Plate Oligo	Standard Desalting	Quantity Only	0.2
Plate 18	H04	86346_1238	GTGTGTTGTGGCGGGTACGCTTCAGCTTCCCGATATCCGACGGTAGTGTNNNNNNNNGCAGAAGAAACCATAGAAATG	200 picomole Ultramer DNA Plate Oligo	Standard Desalting	Quantity Only	0.2
Plate 18	H05	86350_1239	GAAAATTAAAATGTTTTGGCAAAGGGTGGCTTCAGCTTCCCGATATCCGACGGTAGTGTNNNNNNNNCAATATGTTCCGTCCG	200 picomole Ultramer DNA Plate Oligo	Standard Desalting	Quantity Only	0.2
Plate 18	H06	86352_1240	GCACAGTTTTGTTCACGCCTATTGATAACCTTCAGCTTCCCGATATCCGACGGTAGTGTNNNNNNNNGCTGTTGTTGGAGCAT	200 picomole Ultramer DNA Plate Oligo	Standard Desalting	Quantity Only	0.2
Plate 18	H07	86473_1241	GCTGCTTGTTGCTGATGAATGATGATGCTTCAGCTTCCCGATATCCGACGGTAGTGTNNNNNNNNGAGTGACTATGAGACCAG	200 picomole Ultramer DNA Plate Oligo	Standard Desalting	Quantity Only	0.2
Plate 18	H08	86497_1242	GATGGCAATGGATTGTGATGTAATTTTCCCTTCAGCTTCCCGATATCCGACGGTAGTGTNNNNNNNNTTGCTCTGTTTTTGTT	200 picomole Ultramer DNA Plate Oligo	Standard Desalting	Quantity Only	0.2
Plate 18	H09	86550_1243	CAGAAGATTTTTCTCGGGAAAATGCACTTCAGCTTCCCGATATCCGACGGTAGTGTNNNNNNNNGGTGAAGAAGAGATGTACG	200 picomole Ultramer DNA Plate Oligo	Standard Desalting	Quantity Only	0.2
Plate 18	H10	86592_1244	GAAACATGAGCCCATGGGCTCTACTTCAGCTTCCCGATATCCGACGGTAGTGTNNNNNNNNGTAGTGTTTTTATGGTGTTGAT	200 picomole Ultramer DNA Plate Oligo	Standard Desalting	Quantity Only	0.2
Plate 18	H11	86626_1245	GATTACCTCAAGGGAACGAAGTAGACTCTCTTCAGCTTCCCGATATCCGACGGTAGTGTNNNNNNNNCCCACAAGATTCAAAA	200 picomole Ultramer DNA Plate Oligo	Standard Desalting	Quantity Only	0.2
Plate 18	H12	86644_1246	CCCAATGGGCTTCTCTATAAGATGGCCTTCAGCTTCCCGATATCCGACGGTAGTGTNNNNNNNNCCTCCTCCTTACTTTTGCT	200 picomole Ultramer DNA Plate Oligo	Standard Desalting	Quantity Only	0.2
Plate 19	A01	86899_1247	TCCTATGAATATCCAATGATTTCTAAAACCTTCAGCTTCCCGATATCCGACGGTAGTGTNNNNNNNNGCGCTTTGTTGAAGCA	200 picomole Ultramer DNA Plate Oligo	Standard Desalting	Quantity Only	0.2
Plate 19	A02	86907_1248	GAGGGGTTAGGGAGGGAAGGAGTTATATCTTCAGCTTCCCGATATCCGACGGTAGTGTNNNNNNNNTTGCGTGAGAGTAGTA	200 picomole Ultramer DNA Plate Oligo	Standard Desalting	Quantity Only	0.2
Plate 19	A03	86952_1249	GAGCAGGTTCAAGAGTACACGGGCTCTTCAGCTTCCCGATATCCGACGGTAGTGTNNNNNNNNTGTCGAGGGGCATATG	200 picomole Ultramer DNA Plate Oligo	Standard Desalting	Quantity Only	0.2
Plate 19	A04	86978_1250	GAACCTGCGCAAGAATTTACGTTTTAGTCCTTCAGCTTCCCGATATCCGACGGTAGTGTNNNNNNNNCACATACAACGCAACA	200 picomole Ultramer DNA Plate Oligo	Standard Desalting	Quantity Only	0.2
Plate 19	A05	87038_1251	GCCGTTAGGTCGGAGGGTGGACGGCTTCAGCTTCCCGATATCCGACGGTAGTGTNNNNNNNNGAAGCTAGGTCTTAAGATAG	200 picomole Ultramer DNA Plate Oligo	Standard Desalting	Quantity Only	0.2
Plate 19	A06	87072_1252	GCTAATGATTGAGAAGGAGGGAGCTGGCTTCAGCTTCCCGATATCCGACGGTAGTGTNNNNNNNNAGCTCCGTTTGATGAGA	200 picomole Ultramer DNA Plate Oligo	Standard Desalting	Quantity Only	0.2
Plate 19	A07	87081_1253	GGCTTAGCATTTCACCTGCAAGATGGCATCTTCAGCTTCCCGATATCCGACGGTAGTGTNNNNNNNNCAAAAGTAAAGAACAG	200 picomole Ultramer DNA Plate Oligo	Standard Desalting	Quantity Only	0.2
Plate 19	A08	87092_1254	GCTAAGAAGAAGCCTGCAGAGAAGTAAGCTTCAGCTTCCCGATATCCGACGGTAGTGTNNNNNNNNGATGCTAAGATCAGAG	200 picomole Ultramer DNA Plate Oligo	Standard Desalting	Quantity Only	0.2
Plate 19	A09	87126_1255	GCTTTCCATTTCAGATTTTTTGTCCACACTTCAGCTTCCCGATATCCGACGGTAGTGTNNNNNNNNAGGAAGAAGAAGAGAAA	200 picomole Ultramer DNA Plate Oligo	Standard Desalting	Quantity Only	0.2
Plate 19	A10	87131_1256	GCATTTTGTATGGCGAATGGTTTTTTGTCTTCAGCTTCCCGATATCCGACGGTAGTGTNNNNNNNNATAATTCAACATCATGC	200 picomole Ultramer DNA Plate Oligo	Standard Desalting	Quantity Only	0.2
Plate 19	A11	87155_1258	GATGAAGATCCGGTTTCGATTGGGAGTTGCTTCAGCTTCCCGATATCCGACGGTAGTGTNNNNNNNNACGGCCGAAATGGAGA	200 picomole Ultramer DNA Plate Oligo	Standard Desalting	Quantity Only	0.2
Plate 19	A12	87201_0147	CAAATAAACGGAGCCGAGAAACTTTCTCTTCAGCTTCCCGATATCCGACGGTAGTGTNNNNNNNNGATATTTACAAGCTTAGC	200 picomole Ultramer DNA Plate Oligo	Standard Desalting	Quantity Only	0.2
Plate 19	B01	87214_1261	GAAGTCCTGAATTCTGTGTTGCAACACTTCAGCTTCCCGATATCCGACGGTAGTGTNNNNNNNNGGGACTGGAGGCTGTGG	200 picomole Ultramer DNA Plate Oligo	Standard Desalting	Quantity Only	0.2
Plate 19	B02	87285_1262	GCATCCGTTTATGGGAAGCGACACACCTTCAGCTTCCCGATATCCGACGGTAGTGTNNNNNNNNACAAAACAAAAATAACACG	200 picomole Ultramer DNA Plate Oligo	Standard Desalting	Quantity Only	0.2
Plate 19	B03	87297_1263	CAAGACCAAGCTTAGAGAGCATGAGTCGCTTCAGCTTCCCGATATCCGACGGTAGTGTNNNNNNNNCCGTGGCTTTTTGGGC	200 picomole Ultramer DNA Plate Oligo	Standard Desalting	Quantity Only	0.2
Plate 19	B04	87329_1264	GTGTTTGAAGTAATCAATGTATCCTGCACCTTCAGCTTCCCGATATCCGACGGTAGTGTNNNNNNNNGAAGAAGGTGAAGAGG	200 picomole Ultramer DNA Plate Oligo	Standard Desalting	Quantity Only	0.2
Plate 19	B05	87437_1265	GCTTAATTAAGTGTCAGTGATCGCTCTTCAGCTTCCCGATATCCGACGGTAGTGTNNNNNNNNCAATGTTGTAGTTCACAAAA	200 picomole Ultramer DNA Plate Oligo	Standard Desalting	Quantity Only	0.2
Plate 19	B06	87465_1267	GGAAAAGGAGAGAGACCGCCGCGAGGAACTTCAGCTTCCCGATATCCGACGGTAGTGTNNNNNNNNGGAGAGAGATTGAGGA	200 picomole Ultramer DNA Plate Oligo	Standard Desalting	Quantity Only	0.2
Plate 19	B07	87530_1268	ATGATTGGTGGCAGAGGCTCTCCCTCAGCCTTCAGCTTCCCGATATCCGACGGTAGTGTNNNNNNNNTGACTAGATCCACAAA	200 picomole Ultramer DNA Plate Oligo	Standard Desalting	Quantity Only	0.2
Plate 19	B08	87541_1269	GGAAGAAGAGCAGAGTGGGGGAAGAACTTCAGCTTCCCGATATCCGACGGTAGTGTNNNNNNNNTACACAGAGAAGAAAG	200 picomole Ultramer DNA Plate Oligo	Standard Desalting	Quantity Only	0.2
Plate 19	B09	87547_1270	AACCACGCGTCCAACAGCCCCCATGCTTCAGCTTCCCGATATCCGACGGTAGTGTNNNNNNNNTGGAGTTTCAATGGGAG	200 picomole Ultramer DNA Plate Oligo	Standard Desalting	Quantity Only	0.2
Plate 19	B10	87553_1271	TCCTCCTTGCCTCTAATCCGCTTCAGCTTCCCGATATCCGACGGTAGTGTNNNNNNNNCTCCAGAATTCAGTTTCTAGAATTC	200 picomole Ultramer DNA Plate Oligo	Standard Desalting	Quantity Only	0.2
Plate 19	B11	87626_1272	GTTGATTTTGGGTTTCGTTGAGTTACGAACTTCAGCTTCCCGATATCCGACGGTAGTGTNNNNNNNNAGTGAGAGAGATGCGA	200 picomole Ultramer DNA Plate Oligo	Standard Desalting	Quantity Only	0.2
Plate 19	B12	87634_1273	GTCCATTCGGCCACTGTATGATGACCTCTCTTCAGCTTCCCGATATCCGACGGTAGTGTNNNNNNNNACATATTCAGTAGGAG	200 picomole Ultramer DNA Plate Oligo	Standard Desalting	Quantity Only	0.2
Plate 19	C01	87679_1274_SNP_a	ATCTTCACTCAGTTCTCTGGGAACCTTCAGCTTCCCGATATCCGACGGTAGTGTNNNNNNNNCCCAAGCATTGATTATTACCT	200 picomole Ultramer DNA Plate Oligo	Standard Desalting	Quantity Only	0.2
Plate 19	C02	87991_1276	TTCACCACCGTCGTCTTACTCTCCCTTCAGCTTCCCGATATCCGACGGTAGTGTNNNNNNNNACCTTTCACTGCTAATC	200 picomole Ultramer DNA Plate Oligo	Standard Desalting	Quantity Only	0.2
Plate 19	C03	88085_1277	ACCGGATGATAGAACCGGTGGTAATAAGGCTTCAGCTTCCCGATATCCGACGGTAGTGTNNNNNNNNAAAGAGGACGAATCAA	200 picomole Ultramer DNA Plate Oligo	Standard Desalting	Quantity Only	0.2
Plate 19	C04	88154_1278	CCGAGTTCGTAGGTTTTGGCTCCCACCTTCAGCTTCCCGATATCCGACGGTAGTGTNNNNNNNNGATTCGATGCCAGTCCTGC	200 picomole Ultramer DNA Plate Oligo	Standard Desalting	Quantity Only	0.2
Plate 19	C05	88181_1279	CGGGTCGCGATTTGCCTTTTTCTTCAGCTTCCCGATATCCGACGGTAGTGTNNNNNNNNTGTTTGGAAGTTTCGGCTCGATGG	200 picomole Ultramer DNA Plate Oligo	Standard Desalting	Quantity Only	0.2
Plate 19	C06	88215_1280	GCAGAAAGATATAGACGTGATGGCTTCAGCTTCCCGATATCCGACGGTAGTGTNNNNNNNNGGTGGAGCTGATTTGGG	200 picomole Ultramer DNA Plate Oligo	Standard Desalting	Quantity Only	0.2
Plate 19	C07	88238_1281	GAGGGATTGGATTTATGGGTTTAGGGTTCTTCAGCTTCCCGATATCCGACGGTAGTGTNNNNNNNNGAGAATGAACACTAAC	200 picomole Ultramer DNA Plate Oligo	Standard Desalting	Quantity Only	0.2
Plate 19	C08	88258_1282	GCCACGTTTAACAAGCTCGCACAAGCTTCAGCTTCCCGATATCCGACGGTAGTGTNNNNNNNNGCGGGAATGTGGTAAGTGTG	200 picomole Ultramer DNA Plate Oligo	Standard Desalting	Quantity Only	0.2
Plate 19	C09	88448_1283	GTAACATGGGGTTTTGTCTAGGCTTTGGTCTTCAGCTTCCCGATATCCGACGGTAGTGTNNNNNNNNAATCAATAAAAATAAA	200 picomole Ultramer DNA Plate Oligo	Standard Desalting	Quantity Only	0.2
Plate 19	C10	88481_1284	GCCTGGGAATCACAGTGAGATTTCATTGACTTCAGCTTCCCGATATCCGACGGTAGTGTNNNNNNNNTTCTGATTGGGGAAAA	200 picomole Ultramer DNA Plate Oligo	Standard Desalting	Quantity Only	0.2
Plate 19	C11	88578_1285	CAGAGGGAGTCGAGAGCGTACCCTTCAGCTTCCCGATATCCGACGGTAGTGTNNNNNNNNGCACCTTTTGAAGTTGGGCCG	200 picomole Ultramer DNA Plate Oligo	Standard Desalting	Quantity Only	0.2
Plate 19	C12	88779_1286	TAATCTGACCTTAGCAGGAGTGATCAGACTTCAGCTTCCCGATATCCGACGGTAGTGTNNNNNNNNGTGTTGTATGTCTGCAG	200 picomole Ultramer DNA Plate Oligo	Standard Desalting	Quantity Only	0.2
Plate 19	D01	88781_1287	ACCAAATTGAGAGATGGGTGGCATGACCTTCAGCTTCCCGATATCCGACGGTAGTGTNNNNNNNNGCGTTTTACTTGGTCTT	200 picomole Ultramer DNA Plate Oligo	Standard Desalting	Quantity Only	0.2
Plate 19	D02	88841_1288_SNP_a	CAGTCCCAGCAATCACTCCTTCAGCTTCCCGATATCCGACGGTAGTGTNNNNNNNNGCTTTTTTCTTCTCCCTCCTTGCTTTC	200 picomole Ultramer DNA Plate Oligo	Standard Desalting	Quantity Only	0.2
Plate 19	D03	89009_1292	ATATGGGTGTTGATTTGGATTTGGCTTCAGCTTCCCGATATCCGACGGTAGTGTNNNNNNNNCAAAAAAAGGAAAAATTG	200 picomole Ultramer DNA Plate Oligo	Standard Desalting	Quantity Only	0.2
Plate 19	D04	89053_1293	ACTTGGTCTCAGAACCTTTATGGTGCTTCAGCTTCCCGATATCCGACGGTAGTGTNNNNNNNNCAAACTAACAATAGTTAAGA	200 picomole Ultramer DNA Plate Oligo	Standard Desalting	Quantity Only	0.2
Plate 19	D05	89068_0175	ACTTGATGTGCATACTTGTTTTGGTTTCCTTCAGCTTCCCGATATCCGACGGTAGTGTNNNNNNNNGTGAAATCCCTTCCTAT	200 picomole Ultramer DNA Plate Oligo	Standard Desalting	Quantity Only	0.2
Plate 19	D06	89091_1294	GATTTGGGTTTGAAGGAAGAGAAAAAAGGCTTCAGCTTCCCGATATCCGACGGTAGTGTNNNNNNNNAGGGAGTGAGGAGGAA	200 picomole Ultramer DNA Plate Oligo	Standard Desalting	Quantity Only	0.2
Plate 19	D07	89097_1295_SNP_a	GATTTGGTAGCAGAAGCTTTCTCCGCTCTTCAGCTTCCCGATATCCGACGGTAGTGTNNNNNNNNCAAACCAAAACAAAGAGA	200 picomole Ultramer DNA Plate Oligo	Standard Desalting	Quantity Only	0.2
Plate 19	D08	89436_1296	CGTTATGTTTCTCTTAGTTCAGTTAAGGGCTTCAGCTTCCCGATATCCGACGGTAGTGTNNNNNNNNATCAAACCACTGATGA	200 picomole Ultramer DNA Plate Oligo	Standard Desalting	Quantity Only	0.2
Plate 19	D09	89672_0177	GGGCACTCAAGAACACGAAACTAATATTCCTTCAGCTTCCCGATATCCGACGGTAGTGTNNNNNNNNCAAATAGGCCCATTTG	200 picomole Ultramer DNA Plate Oligo	Standard Desalting	Quantity Only	0.2
Plate 19	D10	89719_1297_SNP_a	CACTCCCTCTGTTTACAAATCTCTCCTTCAGCTTCCCGATATCCGACGGTAGTGTNNNNNNNNCCTTAGTGATTCTCGAATGT	200 picomole Ultramer DNA Plate Oligo	Standard Desalting	Quantity Only	0.2
Plate 19	D11	89834_1298	GTGAGGTTGAAGAGTTTTATCATCATGGTCTTCAGCTTCCCGATATCCGACGGTAGTGTNNNNNNNNGGTTTTAAGAGGAGTC	200 picomole Ultramer DNA Plate Oligo	Standard Desalting	Quantity Only	0.2
Plate 19	D12	89839_1299	GATGGTGAATGATCTTACGGCTATCCAAGCTTCAGCTTCCCGATATCCGACGGTAGTGTNNNNNNNNAACCTAAGAAGAGCAA	200 picomole Ultramer DNA Plate Oligo	Standard Desalting	Quantity Only	0.2
Plate 19	E01	89854_1300	GCCGGCGATTGGAAGAGCTGTTTTGTCTTCAGCTTCCCGATATCCGACGGTAGTGTNNNNNNNNTAGCTGAACAAATGGAG	200 picomole Ultramer DNA Plate Oligo	Standard Desalting	Quantity Only	0.2
Plate 19	E02	89876_1301_SNP_a	GCGAATATAATCGGTTTGGGTGCTACGCTTCAGCTTCCCGATATCCGACGGTAGTGTNNNNNNNNATACACAGAGATCATAGG	200 picomole Ultramer DNA Plate Oligo	Standard Desalting	Quantity Only	0.2
Plate 19	E03	89896_1302_SNP_a	GACCTGATCTTCTTCTACTCAAGACCTCGCTTCAGCTTCCCGATATCCGACGGTAGTGTNNNNNNNNCGAAACTCTTCCTCTG	200 picomole Ultramer DNA Plate Oligo	Standard Desalting	Quantity Only	0.2
Plate 19	E04	89911_1303_SNP_a	CGGTTTGGGTGATACGAATCTCTTCAGCTTCCCGATATCCGACGGTAGTGTNNNNNNNNCAGAGATCATAGGAACATTTGTTG	200 picomole Ultramer DNA Plate Oligo	Standard Desalting	Quantity Only	0.2
Plate 19	E05	89962_1304	GTGGTCTGTATGTTGTATGAGTAGTGGTCTTCAGCTTCCCGATATCCGACGGTAGTGTNNNNNNNNTCACTAAGTCACAAAC	200 picomole Ultramer DNA Plate Oligo	Standard Desalting	Quantity Only	0.2
Plate 19	E06	90063_1305	TCGGCTCATATTGTCTTATCACTCCACCCTTCAGCTTCCCGATATCCGACGGTAGTGTNNNNNNNNTCTTTGACCTCAAACTT	200 picomole Ultramer DNA Plate Oligo	Standard Desalting	Quantity Only	0.2
Plate 19	E07	90165_1306_SNP_a	ACGACGAGGAGGGTAGCTCAAGCTTCAGCTTCCCGATATCCGACGGTAGTGTNNNNNNNNACAAAAACAATTTGCGATGATGA	200 picomole Ultramer DNA Plate Oligo	Standard Desalting	Quantity Only	0.2
Plate 19	E08	90245_1308	GGAGCTAAGAGAATGCAAAGTGACCTTCAGCTTCCCGATATCCGACGGTAGTGTNNNNNNNNGTTGTTTTAAAACCTCTTTTC	200 picomole Ultramer DNA Plate Oligo	Standard Desalting	Quantity Only	0.2
Plate 19	E09	90353_1309	GAAGAGAGAGATTCTTGTAACCGAGCAACCTTCAGCTTCCCGATATCCGACGGTAGTGTNNNNNNNNCTTCTGTTGTAGTTGG	200 picomole Ultramer DNA Plate Oligo	Standard Desalting	Quantity Only	0.2
Plate 19	E10	90377_1311	GGGTGGGTTTTGCTCGTTCTGTCCAGCTTCAGCTTCCCGATATCCGACGGTAGTGTNNNNNNNNAAGACCAAAACACAAA	200 picomole Ultramer DNA Plate Oligo	Standard Desalting	Quantity Only	0.2
Plate 19	E11	90527_1313	GATCTTGGAGCAGGATGGCGTCTTCAGCTTCCCGATATCCGACGGTAGTGTNNNNNNNNGACCTTAACACTTAATTAAATCTG	200 picomole Ultramer DNA Plate Oligo	Standard Desalting	Quantity Only	0.2
Plate 19	E12	91288_1315	GCTAATCTGCTCGGGGGATGCGTCTTCAGCTTCCCGATATCCGACGGTAGTGTNNNNNNNNCGAGGCGGTTGTGGCGTT	200 picomole Ultramer DNA Plate Oligo	Standard Desalting	Quantity Only	0.2
Plate 19	F01	91322_1316	AGGAGAACTCGCATACTGGATCGACACCTTCAGCTTCCCGATATCCGACGGTAGTGTNNNNNNNNAACAAGTTAACATTCAAG	200 picomole Ultramer DNA Plate Oligo	Standard Desalting	Quantity Only	0.2
Plate 19	F02	92265_1317	GGATCGAAAATGACTAAGTGTTTGGATCGCTTCAGCTTCCCGATATCCGACGGTAGTGTNNNNNNNNAGAGATCGAAGAAGAT	200 picomole Ultramer DNA Plate Oligo	Standard Desalting	Quantity Only	0.2
Plate 19	F03	92443_0179	GTCATTGTGTATTGTCTGGTTGCGTATCTTCAGCTTCCCGATATCCGACGGTAGTGTNNNNNNNNGAGCAATGGCAACCAA	200 picomole Ultramer DNA Plate Oligo	Standard Desalting	Quantity Only	0.2
Plate 19	F04	92533_1318	GTTTACCTTGATAGCTAGCTGCCCTTCAGCTTCCCGATATCCGACGGTAGTGTNNNNNNNNGTTTGCTGTTGGTAGTGTGC	200 picomole Ultramer DNA Plate Oligo	Standard Desalting	Quantity Only	0.2
Plate 19	F05	92543_1319	GTAAACTGGTGTCTGGTAAGTTTCTTTTGCTTCAGCTTCCCGATATCCGACGGTAGTGTNNNNNNNNGACGTGTTGAGGGAGT	200 picomole Ultramer DNA Plate Oligo	Standard Desalting	Quantity Only	0.2
Plate 19	F06	92655_1322	GTGAATATGACGAGGACAAGGATGAGGACTTCAGCTTCCCGATATCCGACGGTAGTGTNNNNNNNNAAAAGATAATGCAGCGG	200 picomole Ultramer DNA Plate Oligo	Standard Desalting	Quantity Only	0.2
Plate 19	F07	93156_1323	GTCACCAAAGAGTAGTTATCTTTTTCGGTCTTCAGCTTCCCGATATCCGACGGTAGTGTNNNNNNNNAGAGCATCTACGACGC	200 picomole Ultramer DNA Plate Oligo	Standard Desalting	Quantity Only	0.2
Plate 19	F08	93199_0180	CCGTCCATCAGTTCATTGTCCGCTACCTTCAGCTTCCCGATATCCGACGGTAGTGTNNNNNNNNGCATATTTGTAGATTCGCC	200 picomole Ultramer DNA Plate Oligo	Standard Desalting	Quantity Only	0.2
Plate 19	F09	93552_0157	CGTGAAAGCGCCACATACAACTGGCCATCTTCAGCTTCCCGATATCCGACGGTAGTGTNNNNNNNNCGTATCTGGTAAGAAA	200 picomole Ultramer DNA Plate Oligo	Standard Desalting	Quantity Only	0.2
Plate 19	F10	94084_1328	GACCTTAATACTGTACCCATTACTAGGCTTCAGCTTCCCGATATCCGACGGTAGTGTNNNNNNNNGATACATTGATTCCTACT	200 picomole Ultramer DNA Plate Oligo	Standard Desalting	Quantity Only	0.2
Plate 19	F11	94339_0181_SNP_a	AAAAAAAAAGTCTAAGTCAAAGAAGGATACTTCAGCTTCCCGATATCCGACGGTAGTGTNNNNNNNNGAAGAAAAGAGAGAGG	200 picomole Ultramer DNA Plate Oligo	Standard Desalting	Quantity Only	0.2
Plate 19	F12	94670_1329	AATATCTTGTTGAAAGATGAAAGTATGGCTTCAGCTTCCCGATATCCGACGGTAGTGTNNNNNNNNGGCGGTAAAAATCATGG	200 picomole Ultramer DNA Plate Oligo	Standard Desalting	Quantity Only	0.2
Plate 19	G01	95170_1332	ACATACCGTTATCTAAGCTAGATATTCGCTTCAGCTTCCCGATATCCGACGGTAGTGTNNNNNNNNCAAAATTTACACGACG	200 picomole Ultramer DNA Plate Oligo	Standard Desalting	Quantity Only	0.2
Plate 19	G02	95351_1335	TCTCGTTTTGATTGAATGCGAAAGTGGCTTCAGCTTCCCGATATCCGACGGTAGTGTNNNNNNNNGAATTGGAAGGAGACGAG	200 picomole Ultramer DNA Plate Oligo	Standard Desalting	Quantity Only	0.2
Plate 19	G03	95369_1336	GCTTTTCCCATGTGTATAACTTCAGCTTCCCGATATCCGACGGTAGTGTNNNNNNNNGTTGTGTGTGTGTGTGTGTGTGTGT	200 picomole Ultramer DNA Plate Oligo	Standard Desalting	Quantity Only	0.2
Plate 19	G04	95490_1338	CACCATCCTGCATATTCTGCGCTTCAGCTTCCCGATATCCGACGGTAGTGTNNNNNNNNCTATAAATTCCACTGTTTGTACCA	200 picomole Ultramer DNA Plate Oligo	Standard Desalting	Quantity Only	0.2
Plate 19	G05	95577_1339	CGAGAGAGAAGGAGACACGAATGAGTGCTTCAGCTTCCCGATATCCGACGGTAGTGTNNNNNNNNGAGATTGAAGAAGACG	200 picomole Ultramer DNA Plate Oligo	Standard Desalting	Quantity Only	0.2
Plate 19	G06	95597_0184	GCCACACATAGAGCTATCACTTATCAGGGCTTCAGCTTCCCGATATCCGACGGTAGTGTNNNNNNNNAAGTTACTGAGTTGGA	200 picomole Ultramer DNA Plate Oligo	Standard Desalting	Quantity Only	0.2
Plate 19	G07	95602_1340	CTGCGGCGTGGGCTTGGTACCAAACTTCAGCTTCCCGATATCCGACGGTAGTGTNNNNNNNNCCAACTACTACATTTCAACAC	200 picomole Ultramer DNA Plate Oligo	Standard Desalting	Quantity Only	0.2
Plate 19	G08	95672_1341	GCAATTATTAGTTTTCGTTTCAATAACTACTTCAGCTTCCCGATATCCGACGGTAGTGTNNNNNNNNTCTCTCCATCTTCTTC	200 picomole Ultramer DNA Plate Oligo	Standard Desalting	Quantity Only	0.2
Plate 19	G09	95706_1342	GCATGATTGGTGGAGATATGCTTTCTTCAGCTTCCCGATATCCGACGGTAGTGTNNNNNNNNGTGGAAGAGATGATCCGTGAG	200 picomole Ultramer DNA Plate Oligo	Standard Desalting	Quantity Only	0.2
Plate 19	G10	95711_1343	GCTTGGCTATTGGCGGAAACAGCACCGGACTTCAGCTTCCCGATATCCGACGGTAGTGTNNNNNNNNAATCAAAACCCTTTTG	200 picomole Ultramer DNA Plate Oligo	Standard Desalting	Quantity Only	0.2
Plate 19	G11	95712_1344_SNP_a	GGTGTGATCTTAAGCAAGAAAAAACAAGACTTCAGCTTCCCGATATCCGACGGTAGTGTNNNNNNNNGGAAGAGAAAGAGAAT	200 picomole Ultramer DNA Plate Oligo	Standard Desalting	Quantity Only	0.2
Plate 19	G12	95888_0186	GGAATTGTGGATGTGGATGGGCGGACCACTTCAGCTTCCCGATATCCGACGGTAGTGTNNNNNNNNCGCTACTTTCTGTACC	200 picomole Ultramer DNA Plate Oligo	Standard Desalting	Quantity Only	0.2
Plate 19	H01	96232_0167	TTTTTTCGGTTTTGGTTGGTTAAGGGACTCTTCAGCTTCCCGATATCCGACGGTAGTGTNNNNNNNNTTCGGGTTCTATGGAG	200 picomole Ultramer DNA Plate Oligo	Standard Desalting	Quantity Only	0.2
Plate 19	H02	96260_1347	GTAGGGTTGAGTAGCGGAAAGTGGAATGACTTCAGCTTCCCGATATCCGACGGTAGTGTNNNNNNNNCATGTGATACGCTTGT	200 picomole Ultramer DNA Plate Oligo	Standard Desalting	Quantity Only	0.2
Plate 19	H03	96343_1348	GACTGAATATCTAGGGTTTGATTTGGCTCCTTCAGCTTCCCGATATCCGACGGTAGTGTNNNNNNNNTTCAGGTAAAGCAGCG	200 picomole Ultramer DNA Plate Oligo	Standard Desalting	Quantity Only	0.2
Plate 19	H04	96442_1349	GAGGAGGACGAGGCTGAAATGGGTTTCTTCAGCTTCCCGATATCCGACGGTAGTGTNNNNNNNNGGTTTGTTTGGTGGTGG	200 picomole Ultramer DNA Plate Oligo	Standard Desalting	Quantity Only	0.2
Plate 19	H05	96460_1350	CGATACATATTATTCAGCCACATGGCTTCAGCTTCCCGATATCCGACGGTAGTGTNNNNNNNNGCTGATGTAAGATATATAGT	200 picomole Ultramer DNA Plate Oligo	Standard Desalting	Quantity Only	0.2
Plate 19	H06	96462_1351	GCCTGTCAAACTGGAGTTTGTAAGTAGACTTCAGCTTCCCGATATCCGACGGTAGTGTNNNNNNNNTCGGTAGAAATGAGAG	200 picomole Ultramer DNA Plate Oligo	Standard Desalting	Quantity Only	0.2
Plate 19	H07	96478_1352	CGAGCATTAGCTGGGGTGTTGACACTTCAGCTTCCCGATATCCGACGGTAGTGTNNNNNNNNGGGTCCTTGCAGAATTTTCCG	200 picomole Ultramer DNA Plate Oligo	Standard Desalting	Quantity Only	0.2
Plate 19	H08	96676_1353	ACCCCAAAAGTCGGAGACACCACCCAAAACTTCAGCTTCCCGATATCCGACGGTAGTGTNNNNNNNNATATAACCCCACAAGT	200 picomole Ultramer DNA Plate Oligo	Standard Desalting	Quantity Only	0.2
Plate 19	H09	96820_1354	GCCGTCCGATCATTTTTCACCTGTGGCTTCAGCTTCCCGATATCCGACGGTAGTGTNNNNNNNNGCTTTATCGGCGAGAAGTG	200 picomole Ultramer DNA Plate Oligo	Standard Desalting	Quantity Only	0.2
Plate 19	H10	96827_1355	GCGTTTGAAGATTTTGAATTCGAGGCTTCAGCTTCCCGATATCCGACGGTAGTGTNNNNNNNNAGTGAAGGCATTAAACGGAG	200 picomole Ultramer DNA Plate Oligo	Standard Desalting	Quantity Only	0.2
Plate 19	H11	96864_1356_SNP_a	ACTAACAGATGAGAAATTTAAGGGAAAGGCTTCAGCTTCCCGATATCCGACGGTAGTGTNNNNNNNNATGCAGAAGAAAGTGT	200 picomole Ultramer DNA Plate Oligo	Standard Desalting	Quantity Only	0.2
Plate 19	H12	96907_0168	GAAATGTGTTTCCTTCAGGAATTTCCACTTCAGCTTCCCGATATCCGACGGTAGTGTNNNNNNNNAAAAACCAAAATCCCC	200 picomole Ultramer DNA Plate Oligo	Standard Desalting	Quantity Only	0.2
Plate 20	A01	96928_1358	GTTGAGAGTTGGAGACAGGCGGTGTGGCTTCAGCTTCCCGATATCCGACGGTAGTGTNNNNNNNNGTAATAAGGTTACAATCA	200 picomole Ultramer DNA Plate Oligo	Standard Desalting	Quantity Only	0.2
Plate 20	A02	96992_1359	GCTTTTCTTGCTTCTCAAGGCTTCGTTCTTCAGCTTCCCGATATCCGACGGTAGTGTNNNNNNNNTTGAGAAACTTGGTCGGG	200 picomole Ultramer DNA Plate Oligo	Standard Desalting	Quantity Only	0.2
Plate 20	A03	97054_1360	CCATCCATGGTGTTTGACCAGATCATGCTTCAGCTTCCCGATATCCGACGGTAGTGTNNNNNNNNCCAACGACAACAAAAA	200 picomole Ultramer DNA Plate Oligo	Standard Desalting	Quantity Only	0.2
Plate 20	A04	97058_1361	GAATACAAGAAAGGTTTATGGACAGTCTTCAGCTTCCCGATATCCGACGGTAGTGTNNNNNNNNACCGACTCAGCCACTTT	200 picomole Ultramer DNA Plate Oligo	Standard Desalting	Quantity Only	0.2
Plate 20	A05	97070_1362	GTTAATGATGGGTTACAATGGCGTGCTTCAGCTTCCCGATATCCGACGGTAGTGTNNNNNNNNGTGGCTTGCTTGAGCTGGAG	200 picomole Ultramer DNA Plate Oligo	Standard Desalting	Quantity Only	0.2
Plate 20	A06	97071_1363	CTGTGTAGGAGATTTTGTGTGGGCTTCAGCTTCCCGATATCCGACGGTAGTGTNNNNNNNNGTGTTATGAATGGAGTTTCTTC	200 picomole Ultramer DNA Plate Oligo	Standard Desalting	Quantity Only	0.2
Plate 20	A07	97149_1364	AAGACACTCAAGACGATGCAATGGAGCTTCAGCTTCCCGATATCCGACGGTAGTGTNNNNNNNNGGTGATGCTTATATGGAGG	200 picomole Ultramer DNA Plate Oligo	Standard Desalting	Quantity Only	0.2
Plate 20	A08	97158_0169	CTTTGAAGCAATTAGGTGAAACAATCTTCTTCAGCTTCCCGATATCCGACGGTAGTGTNNNNNNNNCGATGGCGTTGCTATAG	200 picomole Ultramer DNA Plate Oligo	Standard Desalting	Quantity Only	0.2
Plate 20	A09	97166_1366	GTATTTATCCCCAACTTGCTAATGATAGACTTCAGCTTCCCGATATCCGACGGTAGTGTNNNNNNNNGTATGTATGCATTCCA	200 picomole Ultramer DNA Plate Oligo	Standard Desalting	Quantity Only	0.2
Plate 20	A10	97171_1367	GTAGCTTCTCAAGGTGCTGCTGTCTCCTTCAGCTTCCCGATATCCGACGGTAGTGTNNNNNNNNCGGCTCATAGGTCTGTT	200 picomole Ultramer DNA Plate Oligo	Standard Desalting	Quantity Only	0.2
Plate 20	A11	97248_1368	AGCTACCAGAGAAAATGGATGTCTCCCTTCAGCTTCCCGATATCCGACGGTAGTGTNNNNNNNNCCAACAAATAAACAAAA	200 picomole Ultramer DNA Plate Oligo	Standard Desalting	Quantity Only	0.2
Plate 20	A12	97350_1369	GCGGAATTTGTGGTTTTGTGTGCCTTCAGCTTCCCGATATCCGACGGTAGTGTNNNNNNNNTCGATTATTCTCGTTTTCTTTG	200 picomole Ultramer DNA Plate Oligo	Standard Desalting	Quantity Only	0.2
Plate 20	B01	97365_1370	TCCATTTACTGTTTCCACCTTCATTGTCTTCAGCTTCCCGATATCCGACGGTAGTGTNNNNNNNNCTAAACCAATAGCAAA	200 picomole Ultramer DNA Plate Oligo	Standard Desalting	Quantity Only	0.2
Plate 20	B02	97463_1371	GGAGAGACATATAGATTCCCTGGTTCAGCCTTCAGCTTCCCGATATCCGACGGTAGTGTNNNNNNNNGAAAAGCCAAAATAAA	200 picomole Ultramer DNA Plate Oligo	Standard Desalting	Quantity Only	0.2
Plate 20	B03	97464_1372	GCTTCGGGGACCAGTTGTTTTTGGCTTCAGCTTCCCGATATCCGACGGTAGTGTNNNNNNNNGCAGACATGTTCATAGTGTG	200 picomole Ultramer DNA Plate Oligo	Standard Desalting	Quantity Only	0.2
Plate 20	B04	97475_1373	GTCATCCTAATCTGTTGTTGCCTTCAGCTTCCCGATATCCGACGGTAGTGTNNNNNNNNTGGCTTGGTCTTTGTGGTGGTCTC	200 picomole Ultramer DNA Plate Oligo	Standard Desalting	Quantity Only	0.2
Plate 20	B05	97476_1374	GAGGAGAGAGAAAGGGAAAGACCCTTCAGCTTCCCGATATCCGACGGTAGTGTNNNNNNNNGTTGTTGTTTTGGTGGTG	200 picomole Ultramer DNA Plate Oligo	Standard Desalting	Quantity Only	0.2
Plate 20	B06	97482_1375	GAGGGATGAGAGTTTTGATGTGTCTCAAGCTTCAGCTTCCCGATATCCGACGGTAGTGTNNNNNNNNAAACTCCATTTCCTCG	200 picomole Ultramer DNA Plate Oligo	Standard Desalting	Quantity Only	0.2
Plate 20	B07	97483_1376	CGGTCCCTATGATCATTATCACTGGCTTCAGCTTCCCGATATCCGACGGTAGTGTNNNNNNNNCTCGACCGTGGTTTTATTG	200 picomole Ultramer DNA Plate Oligo	Standard Desalting	Quantity Only	0.2
Plate 20	B08	97504_1377	CGTTTCCCGGGCTCGTCAGACTGTTCAAGCTTCAGCTTCCCGATATCCGACGGTAGTGTNNNNNNNNCCAAAGAAGACTTGTG	200 picomole Ultramer DNA Plate Oligo	Standard Desalting	Quantity Only	0.2
Plate 20	B09	97512_1378	GCAGCGGCTCGTCCGGTGGCTGGCTTCAGCTTCCCGATATCCGACGGTAGTGTNNNNNNNNAAAACAGGGTCAAAGAG	200 picomole Ultramer DNA Plate Oligo	Standard Desalting	Quantity Only	0.2
Plate 20	B10	97613_1379_SNP_a	CGTCGGTGGTCCTAGGGTTTCATCGCTTCAGCTTCCCGATATCCGACGGTAGTGTNNNNNNNNAACCATATAAAAGCCCAAA	200 picomole Ultramer DNA Plate Oligo	Standard Desalting	Quantity Only	0.2
Plate 20	B11	97648_1380	GCGGCGATAGAGTCGCTGGATAAAATGCTTCAGCTTCCCGATATCCGACGGTAGTGTNNNNNNNNGAATGAAACTGTGGTACG	200 picomole Ultramer DNA Plate Oligo	Standard Desalting	Quantity Only	0.2
Plate 20	B12	97656_1381	CGACACACACGGGTAGCTTCCACTTCAGCTTCCCGATATCCGACGGTAGTGTNNNNNNNNATTCCTTTTGAAAGTAAACCACC	200 picomole Ultramer DNA Plate Oligo	Standard Desalting	Quantity Only	0.2
Plate 20	C01	97704_1383	GTTTCGAAATTAGGCCAAATATCCTTCCTTCAGCTTCCCGATATCCGACGGTAGTGTNNNNNNNNTGATTTGGTACTTCGACC	200 picomole Ultramer DNA Plate Oligo	Standard Desalting	Quantity Only	0.2
Plate 20	C02	97708_1384	AAAAGAACCTTTCTTCTTGCATTCCATTCTTCAGCTTCCCGATATCCGACGGTAGTGTNNNNNNNNCCTTAAAACATCATCAC	200 picomole Ultramer DNA Plate Oligo	Standard Desalting	Quantity Only	0.2
Plate 20	C03	97752_1385	GTGGTGGTTGTTGCAAGAGAAGCATCTTCAGCTTCCCGATATCCGACGGTAGTGTNNNNNNNNTGAGGAGAAGTAAGAAG	200 picomole Ultramer DNA Plate Oligo	Standard Desalting	Quantity Only	0.2
Plate 20	C04	97755_1386	GATCTTAATGGAGTTTGAGTCGGAAGCTTCAGCTTCCCGATATCCGACGGTAGTGTNNNNNNNNGTCGAGAGAGAGGAAG	200 picomole Ultramer DNA Plate Oligo	Standard Desalting	Quantity Only	0.2
Plate 20	C05	97813_0190_SNP_a	CGTTTAAAGTTCAAAAGGTGTTGTTTGTCCTTCAGCTTCCCGATATCCGACGGTAGTGTNNNNNNNNAATGTCTTCATTTGGC	200 picomole Ultramer DNA Plate Oligo	Standard Desalting	Quantity Only	0.2
Plate 20	C06	97869_1387	GTTCAGTTCAAGTTGGTCATCGATCACTTCTTCAGCTTCCCGATATCCGACGGTAGTGTNNNNNNNNGGCTTTTGTTGACTAC	200 picomole Ultramer DNA Plate Oligo	Standard Desalting	Quantity Only	0.2
Plate 20	C07	97891_1388	CCTCGTTAGCTCAACTGAAAAAACACCTCTTCAGCTTCCCGATATCCGACGGTAGTGTNNNNNNNNAGAGCATGTCAAAGAG	200 picomole Ultramer DNA Plate Oligo	Standard Desalting	Quantity Only	0.2
Plate 20	C08	97904_1389	CGGTTACTCCTCAGGTTTATCATGAGCCTTCAGCTTCCCGATATCCGACGGTAGTGTNNNNNNNNTGTTATTGGGAGCGTCTG	200 picomole Ultramer DNA Plate Oligo	Standard Desalting	Quantity Only	0.2
Plate 20	C09	98051_1390_SNP_a	CACCACACATGTTGACGTAGATACGCCCCTTCAGCTTCCCGATATCCGACGGTAGTGTNNNNNNNNAACCGATAAAACAATCA	200 picomole Ultramer DNA Plate Oligo	Standard Desalting	Quantity Only	0.2
Plate 20	C10	98060_1391	TTCTCCGTTGCGTGTTCTTCGTTCCTTCAGCTTCCCGATATCCGACGGTAGTGTNNNNNNNNCTTGCCTTTGATAGAAGCCTT	200 picomole Ultramer DNA Plate Oligo	Standard Desalting	Quantity Only	0.2
Plate 20	C11	98303_0191_SNP_a	GCATAGCATTTCTTTGAATTTAAACAGAACTTCAGCTTCCCGATATCCGACGGTAGTGTNNNNNNNNTTTCTCCAACCTGTCC	200 picomole Ultramer DNA Plate Oligo	Standard Desalting	Quantity Only	0.2
Plate 20	C12	98378_1393_SNP_a	GGGGTTCTTGTGACAATGCCTTGGTCCTTCAGCTTCCCGATATCCGACGGTAGTGTNNNNNNNNTCGAGGCATATGCCACGTT	200 picomole Ultramer DNA Plate Oligo	Standard Desalting	Quantity Only	0.2
Plate 20	D01	98526_1395	CCCTTGGGTTGCGGTCAAGCTGGCTTCAGCTTCCCGATATCCGACGGTAGTGTNNNNNNNNGTGGGTTGTTTCCGGCTAAGTA	200 picomole Ultramer DNA Plate Oligo	Standard Desalting	Quantity Only	0.2
Plate 20	D02	98565_1396	GCAGCGACTCGGAAAAGGTTTAATAAGTTCTTCAGCTTCCCGATATCCGACGGTAGTGTNNNNNNNNACATAGTGATGATGAA	200 picomole Ultramer DNA Plate Oligo	Standard Desalting	Quantity Only	0.2
Plate 20	D03	98584_1397_SNP_a	CTTTTTTGGGCGAGTACAATTTGTTAACTCTTCAGCTTCCCGATATCCGACGGTAGTGTNNNNNNNNAGCTGCTTAGTGGTTT	200 picomole Ultramer DNA Plate Oligo	Standard Desalting	Quantity Only	0.2
Plate 20	D04	98617_1398	GGATCCGTAATCTCTCGGCTTGCATCTTCAGCTTCCCGATATCCGACGGTAGTGTNNNNNNNNGGAGCTTGGCTTTTAGGG	200 picomole Ultramer DNA Plate Oligo	Standard Desalting	Quantity Only	0.2
Plate 20	D05	98674_1399	TTTTTAGCGAGATTCTCTTTCACGACCTTCAGCTTCCCGATATCCGACGGTAGTGTNNNNNNNNGTATGGATCCGATCTGGTG	200 picomole Ultramer DNA Plate Oligo	Standard Desalting	Quantity Only	0.2
Plate 20	D06	98761_1400	CGAGAATCTGAGTTTCTTCTGAGTTTGGCTTCAGCTTCCCGATATCCGACGGTAGTGTNNNNNNNNGAATCAAGAAGAAGATA	200 picomole Ultramer DNA Plate Oligo	Standard Desalting	Quantity Only	0.2
Plate 20	D07	98763_1401	GCAGAGTCTTGTTGAATTTGCCTCTCGTCTTCAGCTTCCCGATATCCGACGGTAGTGTNNNNNNNNAAACAGAGGAATTAGGG	200 picomole Ultramer DNA Plate Oligo	Standard Desalting	Quantity Only	0.2
Plate 20	D08	98814_1402	GGGGATGATGACTGATGAATAGCGCGCGCTTCAGCTTCCCGATATCCGACGGTAGTGTNNNNNNNNGTAGAAGCAATCCATG	200 picomole Ultramer DNA Plate Oligo	Standard Desalting	Quantity Only	0.2
Plate 20	D09	98847_1404	GGTCAAGTCTTTGAGAGATGGGTTTGGGCTTCAGCTTCCCGATATCCGACGGTAGTGTNNNNNNNNTGAAGTCCCGGAGAAAG	200 picomole Ultramer DNA Plate Oligo	Standard Desalting	Quantity Only	0.2
Plate 20	D10	98887_1405	GGCATTTCCATTTCGCGTAGGTTGAGCTTCAGCTTCCCGATATCCGACGGTAGTGTNNNNNNNNAACAGCAATGAACAAA	200 picomole Ultramer DNA Plate Oligo	Standard Desalting	Quantity Only	0.2
Plate 20	D11	98920_1406_SNP_a	GCTTTCCGTTTTTGGTTGTTGTCTCTTCAGCTTCCCGATATCCGACGGTAGTGTNNNNNNNNACTACCAAACTCTCCAA	200 picomole Ultramer DNA Plate Oligo	Standard Desalting	Quantity Only	0.2
Plate 20	D12	99038_1407	CAAATATTCATGTAAGCCCGCCTTCAGCTTCCCGATATCCGACGGTAGTGTNNNNNNNNAAAGCAAGAACCAATACATATTTT	200 picomole Ultramer DNA Plate Oligo	Standard Desalting	Quantity Only	0.2
Plate 20	E01	99090_1408	GCGGGTTCCCTTACTTTTTTACGACAACCTTCAGCTTCCCGATATCCGACGGTAGTGTNNNNNNNNAAATGCAACGGAATATC	200 picomole Ultramer DNA Plate Oligo	Standard Desalting	Quantity Only	0.2
Plate 20	E02	99144_1409	GGCAGAGACTAACTTGAGGGCACTGATACCTTCAGCTTCCCGATATCCGACGGTAGTGTNNNNNNNNGGGAAATGAGGAAGCA	200 picomole Ultramer DNA Plate Oligo	Standard Desalting	Quantity Only	0.2
Plate 20	E03	99274_1410	CGATTGTTTCCTTGTCTTCTGTTCTGTCTTCAGCTTCCCGATATCCGACGGTAGTGTNNNNNNNNAGGGCAGACCATTTGAA	200 picomole Ultramer DNA Plate Oligo	Standard Desalting	Quantity Only	0.2
Plate 20	E04	99290_1412	CGAATTCGATCTTCGATCAAGAAGATCTTCTTCAGCTTCCCGATATCCGACGGTAGTGTNNNNNNNNACCACAAGAAAAATCC	200 picomole Ultramer DNA Plate Oligo	Standard Desalting	Quantity Only	0.2
Plate 20	E05	99301_1413	GGGCAAGTTCTACAAGAAATCAGAAAACTTCAGCTTCCCGATATCCGACGGTAGTGTNNNNNNNNAGAGAGAGAGAAGAGGAA	200 picomole Ultramer DNA Plate Oligo	Standard Desalting	Quantity Only	0.2
Plate 20	E06	99330_1414	CAACATTTTCCTGCAAAATCTTCAGCTGTCTTCAGCTTCCCGATATCCGACGGTAGTGTNNNNNNNNACTAAAACAAAGTCGC	200 picomole Ultramer DNA Plate Oligo	Standard Desalting	Quantity Only	0.2
Plate 20	E07	99354_1416	GTGAGCGTCTCCGATTACAGGTCCATTGCTTCAGCTTCCCGATATCCGACGGTAGTGTNNNNNNNNAACAACAGAAAAAAGAC	200 picomole Ultramer DNA Plate Oligo	Standard Desalting	Quantity Only	0.2
Plate 20	E08	99356_1417	CTTCTCTTCTTCTATTACATTTACTGCCACTTCAGCTTCCCGATATCCGACGGTAGTGTNNNNNNNNTTTCTTCTCCATCTTC	200 picomole Ultramer DNA Plate Oligo	Standard Desalting	Quantity Only	0.2
Plate 20	E09	99359_1418	GCGGATCGAGAACCTAATTTAGCTTAGGGCTTCAGCTTCCCGATATCCGACGGTAGTGTNNNNNNNNCGCATCACGAATACAC	200 picomole Ultramer DNA Plate Oligo	Standard Desalting	Quantity Only	0.2
Plate 20	E10	99385_1419	GACATCAGTGTCCTTGGATCGGCCCTTCAGCTTCCCGATATCCGACGGTAGTGTNNNNNNNNGTCGTCACGACTTTGATATGT	200 picomole Ultramer DNA Plate Oligo	Standard Desalting	Quantity Only	0.2
Plate 20	E11	99419_1420	CCCTTCTTATGTTGTCCAAGTTGCCCTTCAGCTTCCCGATATCCGACGGTAGTGTNNNNNNNNTTCTATCATGGCTCCTG	200 picomole Ultramer DNA Plate Oligo	Standard Desalting	Quantity Only	0.2
Plate 20	E12	99545_1421_SNP_a	GTTTCAGGATTGGTAAGTTAGAAATGTCTTCAGCTTCCCGATATCCGACGGTAGTGTNNNNNNNNGGGTTTGTTCTGTTTTG	200 picomole Ultramer DNA Plate Oligo	Standard Desalting	Quantity Only	0.2
Plate 20	F01	99548_1422	GCAGGAGAACCGCTCTCATTCTCTTCTGCTTCAGCTTCCCGATATCCGACGGTAGTGTNNNNNNNNACCAAAACGGAAACAAA	200 picomole Ultramer DNA Plate Oligo	Standard Desalting	Quantity Only	0.2
Plate 20	F02	99634_1423	GGCTTTAGACCAATCAGAACAAGATTCCTTCAGCTTCCCGATATCCGACGGTAGTGTNNNNNNNNGTGGGTTACGGGTGCGTT	200 picomole Ultramer DNA Plate Oligo	Standard Desalting	Quantity Only	0.2
Plate 20	F03	99688_1424	GATGATGACTCTTCTTGGATTGGCTCTTCAGCTTCCCGATATCCGACGGTAGTGTNNNNNNNNCAACAACAAAAACATAAGAA	200 picomole Ultramer DNA Plate Oligo	Standard Desalting	Quantity Only	0.2
Plate 20	F04	99801_0175	GAGGAGATACTTTGTCGCGTTCCTGCCACCTTCAGCTTCCCGATATCCGACGGTAGTGTNNNNNNNNAGAGGAAGAAGTTATC	200 picomole Ultramer DNA Plate Oligo	Standard Desalting	Quantity Only	0.2
Plate 20	F05	99832_1428	GTCTTTTCGAGTGTTTTAAAAGGGAAGGCTTCAGCTTCCCGATATCCGACGGTAGTGTNNNNNNNNAGTGAAGTAGTGTACA	200 picomole Ultramer DNA Plate Oligo	Standard Desalting	Quantity Only	0.2
Plate 20	F06	99836_1429	AGACTAACGTTAAGGGCAAGCCGGCGACTTCAGCTTCCCGATATCCGACGGTAGTGTNNNNNNNNGTAGGGATTCAATTGAAG	200 picomole Ultramer DNA Plate Oligo	Standard Desalting	Quantity Only	0.2
Plate 20	F07	99849_1430	GGCTTTGTGTCTCTCATCGCTTCCTCTTCAGCTTCCCGATATCCGACGGTAGTGTNNNNNNNNCCACAATAAACGAACAA	200 picomole Ultramer DNA Plate Oligo	Standard Desalting	Quantity Only	0.2
Plate 20	F08	99998_1432	GATATCTTTGGGAGCTTCAATGGCGACTTCAGCTTCCCGATATCCGACGGTAGTGTNNNNNNNNTGGCATGGCTCCCTCGATT	200 picomole Ultramer DNA Plate Oligo	Standard Desalting	Quantity Only	0.2
Plate 20	F09	100024_1433	GCACGGCTCTGCTCCTAAACCTTGGCTTCAGCTTCCCGATATCCGACGGTAGTGTNNNNNNNNCATCAAACCAATTGACTCAA	200 picomole Ultramer DNA Plate Oligo	Standard Desalting	Quantity Only	0.2
Plate 20	F10	100048_1434	CGGCCCTCTTTTTGTTTCTCGCTTCAGCTTCCCGATATCCGACGGTAGTGTNNNNNNNNTCTCTCTGTCACTTTACTGTGTCC	200 picomole Ultramer DNA Plate Oligo	Standard Desalting	Quantity Only	0.2
Plate 20	F11	100082_1436	GAGTGATATAAGCTCTGGCGGCTCCCTTCAGCTTCCCGATATCCGACGGTAGTGTNNNNNNNNGGTTGGGAGATTAGTTGAG	200 picomole Ultramer DNA Plate Oligo	Standard Desalting	Quantity Only	0.2
Plate 20	F12	100094_1437	GGTGGTAATGGTCGTATCTCCGGCGACTTCAGCTTCCCGATATCCGACGGTAGTGTNNNNNNNNGGAGCAGGAGGAAGAG	200 picomole Ultramer DNA Plate Oligo	Standard Desalting	Quantity Only	0.2
Plate 20	G01	100099_1438	GTCTAGTGAAAGTTCGTGAAGAATGGGGCTTCAGCTTCCCGATATCCGACGGTAGTGTNNNNNNNNAGAGCACAATGAAGAAG	200 picomole Ultramer DNA Plate Oligo	Standard Desalting	Quantity Only	0.2
Plate 20	G02	100100_0194	GTGACATGATATTCAATTTTTGTGATACACTTCAGCTTCCCGATATCCGACGGTAGTGTNNNNNNNNTTTGGGGTGTTTGCTG	200 picomole Ultramer DNA Plate Oligo	Standard Desalting	Quantity Only	0.2
Plate 20	G03	100101_1439	GCACGTGAGAGAGACTGGTGTGCTTCAGCTTCCCGATATCCGACGGTAGTGTNNNNNNNNATCGAGAGAAATCGAGGT	200 picomole Ultramer DNA Plate Oligo	Standard Desalting	Quantity Only	0.2
Plate 20	G04	100102_1440	GCTGGAGAATCCGTTTGTGAAGTGCTTCAGCTTCCCGATATCCGACGGTAGTGTNNNNNNNNGCGGATACCTTTCAGGGA	200 picomole Ultramer DNA Plate Oligo	Standard Desalting	Quantity Only	0.2
Plate 20	G05	100158_1441	GTTTAAGGTGACTTACAACATCCTTTGACTTCAGCTTCCCGATATCCGACGGTAGTGTNNNNNNNNGCTAATGGGTGGATTG	200 picomole Ultramer DNA Plate Oligo	Standard Desalting	Quantity Only	0.2
Plate 20	G06	100321_1443	GTGGTGTGATCGGTTAGGGTTTGCTTCAGCTTCCCGATATCCGACGGTAGTGTNNNNNNNNCGGAGCCTTTTCGATGTCTG	200 picomole Ultramer DNA Plate Oligo	Standard Desalting	Quantity Only	0.2
Plate 20	G07	100347_1444	GGAGGGATGAAGCTGACAGTTACCTCTTCAGCTTCCCGATATCCGACGGTAGTGTNNNNNNNNGTGTGAGGTTGTGTCT	200 picomole Ultramer DNA Plate Oligo	Standard Desalting	Quantity Only	0.2
Plate 20	G08	100351_1445	TCACCACCGCCGTGACGACGGACCTTCAGCTTCCCGATATCCGACGGTAGTGTNNNNNNNNGAGAGAACAAAAAAAATGGTGG	200 picomole Ultramer DNA Plate Oligo	Standard Desalting	Quantity Only	0.2
Plate 20	G09	100414_1446	GTAAAAGTTCGGTGGAGTGTATTAAGCTTCAGCTTCCCGATATCCGACGGTAGTGTNNNNNNNNGGGAGAAAGAGTAGGAG	200 picomole Ultramer DNA Plate Oligo	Standard Desalting	Quantity Only	0.2
Plate 20	G10	100430_1447	GTGTGTTTTGTGTACGGCCCTCTTCAGCTTCCCGATATCCGACGGTAGTGTNNNNNNNNGCGGTTGATCACTGTTGGAATGG	200 picomole Ultramer DNA Plate Oligo	Standard Desalting	Quantity Only	0.2
Plate 20	G11	100435_1448	GCAGGATCAAAATTTGAAATCAAAAGGCTTCAGCTTCCCGATATCCGACGGTAGTGTNNNNNNNNCTCTCTCTCTATTTAT	200 picomole Ultramer DNA Plate Oligo	Standard Desalting	Quantity Only	0.2
Plate 20	G12	100450_0195	ACTTGTAAAATAACATGATTTATCCACCGCTTCAGCTTCCCGATATCCGACGGTAGTGTNNNNNNNNACGGCGTATTCGTAGG	200 picomole Ultramer DNA Plate Oligo	Standard Desalting	Quantity Only	0.2
Plate 20	H01	100469_1449	GCGCGGCGATTGATTAAGCGAGAACGACGCTTCAGCTTCCCGATATCCGACGGTAGTGTNNNNNNNNCTCGTAGTTATCACGA	200 picomole Ultramer DNA Plate Oligo	Standard Desalting	Quantity Only	0.2
Plate 20	H02	100491_1450	GAGTAAAATGCAGGAGGGCGGGAAAACAACTTCAGCTTCCCGATATCCGACGGTAGTGTNNNNNNNNGGTAGATATCAGCTAG	200 picomole Ultramer DNA Plate Oligo	Standard Desalting	Quantity Only	0.2
Plate 20	H03	100503_1451	GCAAAAATTGGTGATGTCAGCTTCCCGCTTCAGCTTCCCGATATCCGACGGTAGTGTNNNNNNNNAAACAGTGACTCACATCA	200 picomole Ultramer DNA Plate Oligo	Standard Desalting	Quantity Only	0.2
Plate 20	H04	100509_1452	GAAGCTCGAATCTTCATGGCGGACGACACTTCAGCTTCCCGATATCCGACGGTAGTGTNNNNNNNNAAAACCTATAGAGAAAC	200 picomole Ultramer DNA Plate Oligo	Standard Desalting	Quantity Only	0.2
Plate 20	H05	100518_1453	CCAATTTGGGATTTATCTGTGGCCTTCAGCTTCCCGATATCCGACGGTAGTGTNNNNNNNNGAGTGGCGTAGAGGGAGG	200 picomole Ultramer DNA Plate Oligo	Standard Desalting	Quantity Only	0.2
Plate 20	H06	100521_1454	GTGATGGACATGATTATTTGTTGGCCTGCTTCAGCTTCCCGATATCCGACGGTAGTGTNNNNNNNNGCGTCATTGTTTCTATC	200 picomole Ultramer DNA Plate Oligo	Standard Desalting	Quantity Only	0.2
Plate 20	H07	100562_1455	CTCTTACCTCTCACTTCCACCCTTCAGCTTCCCGATATCCGACGGTAGTGTNNNNNNNNCACAAAAATCCAAAGACAAATC	200 picomole Ultramer DNA Plate Oligo	Standard Desalting	Quantity Only	0.2
Plate 20	H08	100570_1456	GTGATTTTTGTGACTTGGGTTGTGTTCCTTCAGCTTCCCGATATCCGACGGTAGTGTNNNNNNNNACACTAAGCAGTAGAA	200 picomole Ultramer DNA Plate Oligo	Standard Desalting	Quantity Only	0.2
Plate 20	H09	100574_1457	CAACTCGGCCAACTATTTTAGAGTAAGACTTCAGCTTCCCGATATCCGACGGTAGTGTNNNNNNNNATGGAGGAAACACAAA	200 picomole Ultramer DNA Plate Oligo	Standard Desalting	Quantity Only	0.2
Plate 20	H10	100665_1458	AGGTTTTGGGCGGAGTTCTGATGCTTCAGCTTCCCGATATCCGACGGTAGTGTNNNNNNNNGAGACACAATCCAGAAA	200 picomole Ultramer DNA Plate Oligo	Standard Desalting	Quantity Only	0.2
Plate 20	H11	100701_1459	CGGCTTGTTTGGTAATGAAATGGATCTTCAGCTTCCCGATATCCGACGGTAGTGTNNNNNNNNGGGTCTGAATGAAGTTTGG	200 picomole Ultramer DNA Plate Oligo	Standard Desalting	Quantity Only	0.2
Plate 20	H12	100718_1460	GTGTGTGTATATGGAGGTTTTGGCTTCAGCTTCCCGATATCCGACGGTAGTGTNNNNNNNNCATGCTTTGAGCATTGGTTAAG	200 picomole Ultramer DNA Plate Oligo	Standard Desalting	Quantity Only	0.2
Plate 21	A01	100981_1461	GCTTTCTCTTTCGTTTCTCGGGTTTGCTTCAGCTTCCCGATATCCGACGGTAGTGTNNNNNNNNGTGTTTAATAAGCGCACC	200 picomole Ultramer DNA Plate Oligo	Standard Desalting	Quantity Only	0.2
Plate 21	A02	100984_1462	TCTTGTTGCTTTAGTAGAGCACCGTTCCTTCAGCTTCCCGATATCCGACGGTAGTGTNNNNNNNNTCCCATTTTGTCGTTGG	200 picomole Ultramer DNA Plate Oligo	Standard Desalting	Quantity Only	0.2
Plate 21	A03	100995_1463	GGAGTTGAGATTCTCATGGGATATTCTTCCTTCAGCTTCCCGATATCCGACGGTAGTGTNNNNNNNNCAGAGATTGAAGAAAG	200 picomole Ultramer DNA Plate Oligo	Standard Desalting	Quantity Only	0.2
Plate 21	A04	101098_1464	CGTTGGGGTCGATTCGAGCATATAGCTGACTTCAGCTTCCCGATATCCGACGGTAGTGTNNNNNNNNCATAGAAACGAACGAG	200 picomole Ultramer DNA Plate Oligo	Standard Desalting	Quantity Only	0.2
Plate 21	A05	101167_1465	GGGTTTGCTCTTGGTTTAGGTGTCTTCAGCTTCCCGATATCCGACGGTAGTGTNNNNNNNNGAGTGGTTTAGCTGAGGAGG	200 picomole Ultramer DNA Plate Oligo	Standard Desalting	Quantity Only	0.2
Plate 21	A06	101196_1466	GCTTCTGTGCAATGTGACCTCGTCTTCCTTCAGCTTCCCGATATCCGACGGTAGTGTNNNNNNNNCAAAGAGTGGGTGGGA	200 picomole Ultramer DNA Plate Oligo	Standard Desalting	Quantity Only	0.2
Plate 21	A07	101244_0199	GTGGTATAGTGGATCTGAAGTTTGTTGACCTTCAGCTTCCCGATATCCGACGGTAGTGTNNNNNNNNACTATGATAGTGGGAA	200 picomole Ultramer DNA Plate Oligo	Standard Desalting	Quantity Only	0.2
Plate 21	A08	101270_1467	CGCTAAAAATTATACCATTTCTGTAGGGTCTTCAGCTTCCCGATATCCGACGGTAGTGTNNNNNNNNGAAGCGATGTCCATAC	200 picomole Ultramer DNA Plate Oligo	Standard Desalting	Quantity Only	0.2
Plate 21	A09	101305_1468	GGGTCCTAAATCCTAAGTTTCACAGCATCCTTCAGCTTCCCGATATCCGACGGTAGTGTNNNNNNNNCCGCCTGACAAAAAAA	200 picomole Ultramer DNA Plate Oligo	Standard Desalting	Quantity Only	0.2
Plate 21	A10	101307_0200	CACGTATACATGTTATGCATGCAGTAGCTTCAGCTTCCCGATATCCGACGGTAGTGTNNNNNNNNGTTGATGAAGCTGTCATG	200 picomole Ultramer DNA Plate Oligo	Standard Desalting	Quantity Only	0.2
Plate 21	A11	101328_1469	TCTCCGTCGCCGATGATTGATCTCCTTCAGCTTCCCGATATCCGACGGTAGTGTNNNNNNNNGGCGGTAATGGATTCTCCGGG	200 picomole Ultramer DNA Plate Oligo	Standard Desalting	Quantity Only	0.2
Plate 21	A12	101381_1470	GAGGAGAAATTAATAAAGAGGTCATGAAGCTTCAGCTTCCCGATATCCGACGGTAGTGTNNNNNNNNATGACGGTACGTAGGA	200 picomole Ultramer DNA Plate Oligo	Standard Desalting	Quantity Only	0.2
Plate 21	B01	101400_1471	CGGGTAAAAATGGTTTGCAAGAATCTTGTCTTCAGCTTCCCGATATCCGACGGTAGTGTNNNNNNNNGGGAAAACCCTAACAC	200 picomole Ultramer DNA Plate Oligo	Standard Desalting	Quantity Only	0.2
Plate 21	B02	101413_1472_SNP_a	GTGGAATCGACGGCGGATTCTGAGATCTTCAGCTTCCCGATATCCGACGGTAGTGTNNNNNNNNGCTTTTGTTAGAAACAGAG	200 picomole Ultramer DNA Plate Oligo	Standard Desalting	Quantity Only	0.2
Plate 21	B03	101422_1473	GTTTTTTGGATACTATTGAATCCAGTCTGCTTCAGCTTCCCGATATCCGACGGTAGTGTNNNNNNNNATGGAAAGTGGGGTAG	200 picomole Ultramer DNA Plate Oligo	Standard Desalting	Quantity Only	0.2
Plate 21	B04	101512_1474	CTGTAAACTTGGCACAAACCCGTCTTCAGCTTCCCGATATCCGACGGTAGTGTNNNNNNNNTGTCCTCTGCGGTTAGCGTTTC	200 picomole Ultramer DNA Plate Oligo	Standard Desalting	Quantity Only	0.2
Plate 21	B05	101575_1475	TCTCCATCCGATCCCTCCCTTCAGCTTCCCGATATCCGACGGTAGTGTNNNNNNNNCTTATCCAACTTTGTTTTTCTTTCCTT	200 picomole Ultramer DNA Plate Oligo	Standard Desalting	Quantity Only	0.2
Plate 21	B06	101631_1476	GCAAATGAGAAAAAGGAAAACTAGAGATTCTTCAGCTTCCCGATATCCGACGGTAGTGTNNNNNNNNATGGAAAATGACGAGA	200 picomole Ultramer DNA Plate Oligo	Standard Desalting	Quantity Only	0.2
Plate 21	B07	101649_1477	ACCAGTCAGATTAACCGTGGAATAGCCTTCAGCTTCCCGATATCCGACGGTAGTGTNNNNNNNNGGTGGTTGCTGCTCATG	200 picomole Ultramer DNA Plate Oligo	Standard Desalting	Quantity Only	0.2
Plate 21	B08	101666_1478	TAAACGCCGTGGTTTCACTGCTCCTTCAGCTTCCCGATATCCGACGGTAGTGTNNNNNNNNGGACCTGTTTCTGATGGGTAAG	200 picomole Ultramer DNA Plate Oligo	Standard Desalting	Quantity Only	0.2
Plate 21	B09	101747_1479	TCAAGAACAACCAAGCTCTCCCTTCAGCTTCCCGATATCCGACGGTAGTGTNNNNNNNNGGATGAATGGGTGATCTCTAGGGT	200 picomole Ultramer DNA Plate Oligo	Standard Desalting	Quantity Only	0.2
Plate 21	B10	101762_1480	GCTAATGGGAGTAGCCAAGAAACACAGACCTTCAGCTTCCCGATATCCGACGGTAGTGTNNNNNNNNTTCAAAGTCAACCCAC	200 picomole Ultramer DNA Plate Oligo	Standard Desalting	Quantity Only	0.2
Plate 21	B11	101851_1481	GCACCACGACTTTGTTTTCCCCCTTTGAGCTTCAGCTTCCCGATATCCGACGGTAGTGTNNNNNNNNGAGAGGTGAACATAAG	200 picomole Ultramer DNA Plate Oligo	Standard Desalting	Quantity Only	0.2
Plate 21	B12	101899_1482	GTTGTTCAACGATCCGAAAATGTAGAAAGCTTCAGCTTCCCGATATCCGACGGTAGTGTNNNNNNNNTTAATCACCCAAAAAA	200 picomole Ultramer DNA Plate Oligo	Standard Desalting	Quantity Only	0.2
Plate 21	C01	101922_1483	GCCCCTGGTTGGTGAGTGAATGGGCTTCAGCTTCCCGATATCCGACGGTAGTGTNNNNNNNNGAGGAGAAGGATCATACGGG	200 picomole Ultramer DNA Plate Oligo	Standard Desalting	Quantity Only	0.2
Plate 21	C02	101952_1484	GGTGAACAGTTCAATAAGCTTGAAGCTGCCTTCAGCTTCCCGATATCCGACGGTAGTGTNNNNNNNNGGGTTCGTTTGCTTTG	200 picomole Ultramer DNA Plate Oligo	Standard Desalting	Quantity Only	0.2
Plate 21	C03	101986_1485	GTTGTTGGGGACTTTAGGTGCCCTTCAGCTTCCCGATATCCGACGGTAGTGTNNNNNNNNGCTTCTTATTTTTGGTAAGATTG	200 picomole Ultramer DNA Plate Oligo	Standard Desalting	Quantity Only	0.2
Plate 21	C04	102024_1486	GCGGCGTTTGACGGTGGTTGCTCTTCAGCTTCCCGATATCCGACGGTAGTGTNNNNNNNNACGACTTAACATCGCTAGCGGA	200 picomole Ultramer DNA Plate Oligo	Standard Desalting	Quantity Only	0.2
Plate 21	C05	102025_1487	TCCGTAGCTGATCTTGAAGAAATGGCTTCAGCTTCCCGATATCCGACGGTAGTGTNNNNNNNNAGAGAGGAGCCATGGAG	200 picomole Ultramer DNA Plate Oligo	Standard Desalting	Quantity Only	0.2
Plate 21	C06	102046_1488	GGTCGTCCGTCGAAGGCAGATCTGGCGGCTTCAGCTTCCCGATATCCGACGGTAGTGTNNNNNNNNCCGGAAAAAAATAGAAA	200 picomole Ultramer DNA Plate Oligo	Standard Desalting	Quantity Only	0.2
Plate 21	C07	102051_1489	GCAACGTACAGGTGCGCACGATAATGGAGCTTCAGCTTCCCGATATCCGACGGTAGTGTNNNNNNNNTCTAGGAAACAAATAA	200 picomole Ultramer DNA Plate Oligo	Standard Desalting	Quantity Only	0.2
Plate 21	C08	102113_1490	TACTTCATCAGCTGCAAAGCCAAAAGCGACTTCAGCTTCCCGATATCCGACGGTAGTGTNNNNNNNNCACCAAAAATGAAAGC	200 picomole Ultramer DNA Plate Oligo	Standard Desalting	Quantity Only	0.2
Plate 21	C09	102151_1491_SNP_a	GCTTTTTGGTTTGTGGGATTCGAATTTATCTTCAGCTTCCCGATATCCGACGGTAGTGTNNNNNNNNGAAACTTTGAAGCTTG	200 picomole Ultramer DNA Plate Oligo	Standard Desalting	Quantity Only	0.2
Plate 21	C10	102185_1492	GTGTTACTGTGGTTGGTTTGTGCCTTCAGCTTCCCGATATCCGACGGTAGTGTNNNNNNNNAGACCAATATCTCTATCTTAG	200 picomole Ultramer DNA Plate Oligo	Standard Desalting	Quantity Only	0.2
Plate 21	C11	102187_1493	GCGCGTACGTCACGACAAACCCACGAGTCCTTCAGCTTCCCGATATCCGACGGTAGTGTNNNNNNNNCATAAGAGAAAACAAA	200 picomole Ultramer DNA Plate Oligo	Standard Desalting	Quantity Only	0.2
Plate 21	C12	102194_1494	GGGGTTTGGCAAAAGCAGCTGCTTTGGTCTTCAGCTTCCCGATATCCGACGGTAGTGTNNNNNNNNTAGAATAGCGGCGAGA	200 picomole Ultramer DNA Plate Oligo	Standard Desalting	Quantity Only	0.2
Plate 21	D01	102220_1495	GTGGTAGAGGACCAGGTGGTCCAATGCTTCAGCTTCCCGATATCCGACGGTAGTGTNNNNNNNNAAGAGAGGAGGGCCTG	200 picomole Ultramer DNA Plate Oligo	Standard Desalting	Quantity Only	0.2
Plate 21	D02	102224_1496	GGTGGTGGACCTGGTGGTTGGTTGCTTCAGCTTCCCGATATCCGACGGTAGTGTNNNNNNNNGAGGAATAGTAAGCCA	200 picomole Ultramer DNA Plate Oligo	Standard Desalting	Quantity Only	0.2
Plate 21	D03	102277_1497_SNP_a	AGAGAGAGAACAGTCACTGTTCATGTCTTCAGCTTCCCGATATCCGACGGTAGTGTNNNNNNNNAAAAAGAACAGAGCTTTA	200 picomole Ultramer DNA Plate Oligo	Standard Desalting	Quantity Only	0.2
Plate 21	D04	102293_1498_SNP_a	ACTGTTGTGGAAACATAACACTATCAGTCTTCAGCTTCCCGATATCCGACGGTAGTGTNNNNNNNNAAATTAAAACACACACA	200 picomole Ultramer DNA Plate Oligo	Standard Desalting	Quantity Only	0.2
Plate 21	D05	102295_1499	GCCCTAACCGACGACTAATTGATGGGCTTCAGCTTCCCGATATCCGACGGTAGTGTNNNNNNNNAAGAAACAGAGAAAGAGA	200 picomole Ultramer DNA Plate Oligo	Standard Desalting	Quantity Only	0.2
Plate 21	D06	102379_0204	CATACGACTCTCAACATACACTTTGAACCTTCAGCTTCCCGATATCCGACGGTAGTGTNNNNNNNNGCTATGTTAAGATGTGG	200 picomole Ultramer DNA Plate Oligo	Standard Desalting	Quantity Only	0.2
Plate 21	D07	102440_1501	GGGGGCAATGATGGGCAGAGAGTAGCTTCAGCTTCCCGATATCCGACGGTAGTGTNNNNNNNNATAAAGAAAAACCAAGC	200 picomole Ultramer DNA Plate Oligo	Standard Desalting	Quantity Only	0.2
Plate 21	D08	102477_0205	GCGCTTTATTGGCTAAAATCTGCGCATGCTTCAGCTTCCCGATATCCGACGGTAGTGTNNNNNNNNCACAAATAATGGTGCTC	200 picomole Ultramer DNA Plate Oligo	Standard Desalting	Quantity Only	0.2
Plate 21	D09	102543_1502	ACAAATGAAGACACAAAGAGAGAGAGCTTCAGCTTCCCGATATCCGACGGTAGTGTNNNNNNNNGAAGAATTAGAAGGGAC	200 picomole Ultramer DNA Plate Oligo	Standard Desalting	Quantity Only	0.2
Plate 21	D10	102589_0207_SNP_a	CCTGCCCAGAATATACATACAATCCTACCTTCAGCTTCCCGATATCCGACGGTAGTGTNNNNNNNNCTCGCACTTTCCTGCT	200 picomole Ultramer DNA Plate Oligo	Standard Desalting	Quantity Only	0.2
Plate 21	D11	102607_0208	GCATTTGCATACTTGCATGTAACTGGCTCTTCAGCTTCCCGATATCCGACGGTAGTGTNNNNNNNNATCGCGTGGGGGTGCT	200 picomole Ultramer DNA Plate Oligo	Standard Desalting	Quantity Only	0.2
Plate 21	D12	102610_1503	CGGCTTGGTTAGAGGGTTTCACATCACTTCAGCTTCCCGATATCCGACGGTAGTGTNNNNNNNNGCTAAATATGTGACGG	200 picomole Ultramer DNA Plate Oligo	Standard Desalting	Quantity Only	0.2
Plate 21	E01	102627_1504	GTATAATTCCCCACTCATACTTCTGCCCTTCAGCTTCCCGATATCCGACGGTAGTGTNNNNNNNNCCGGTGACTGATGGAA	200 picomole Ultramer DNA Plate Oligo	Standard Desalting	Quantity Only	0.2
Plate 21	E02	102717_1505	CTTGGGCTTGCATTGTATGTCTGATGGCTTCAGCTTCCCGATATCCGACGGTAGTGTNNNNNNNNCAAAAACCGACAAGCTG	200 picomole Ultramer DNA Plate Oligo	Standard Desalting	Quantity Only	0.2
[truncated: 80 more rows]

## Sheet: Well Positions
96 Well Rows	96 Well Columns	384 Well Rows	384 Well Columns
A1	A1	A1	A1
A2	B1	A2	B1
A3	C1	A3	C1
A4	D1	A4	D1
A5	E1	A5	E1
A6	F1	A6	F1
A7	G1	A7	G1
A8	H1	A8	H1
A9	A2	A9	I1
A10	B2	A10	J1
A11	C2	A11	K1
A12	D2	A12	L1
B1	E2	A13	M1
B2	F2	A14	N1
B3	G2	A15	O1
B4	H2	A16	P1
B5	A3	A17	A2
B6	B3	A18	B2
B7	C3	A19	C2
B8	D3	A20	D2
B9	E3	A21	E2
B10	F3	A22	F2
B11	G3	A23	G2
B12	H3	A24	H2
C1	A4	B1	I2
C2	B4	B2	J2
C3	C4	B3	K2
C4	D4	B4	L2
C5	E4	B5	M2
C6	F4	B6	N2
C7	G4	B7	O2
C8	H4	B8	P2
C9	A5	B9	A3
C10	B5	B10	B3
C11	C5	B11	C3
C12	D5	B12	D3
D1	E5	B13	E3
D2	F5	B14	F3
D3	G5	B15	G3
D4	H5	B16	H3
D5	A6	B17	I3
D6	B6	B18	J3
D7	C6	B19	K3
D8	D6	B20	L3
D9	E6	B21	M3
D10	F6	B22	N3
D11	G6	B23	O3
D12	H6	B24	P3
E1	A7	C1	A4
E2	B7	C2	B4
E3	C7	C3	C4
E4	D7	C4	D4
E5	E7	C5	E4
E6	F7	C6	F4
E7	G7	C7	G4
E8	H7	C8	H4
E9	A8	C9	I4
E10	B8	C10	J4
E11	C8	C11	K4
E12	D8	C12	L4
F1	E8	C13	M4
F2	F8	C14	N4
F3	G8	C15	O4
F4	H8	C16	P4
F5	A9	C17	A5
F6	B9	C18	B5
F7	C9	C19	C5
F8	D9	C20	D5
F9	E9	C21	E5
F10	F9	C22	F5
F11	G9	C23	G5
F12	H9	C24	H5
G1	A10	D1	I5
G2	B10	D2	J5
G3	C10	D3	K5
G4	D10	D4	L5
G5	E10	D5	M5
G6	F10	D6	N5
G7	G10	D7	O5
G8	H10	D8	P5
G9	A11	D9	A6
G10	B11	D10	B6
G11	C11	D11	C6
G12	D11	D12	D6
H1	E11	D13	E6
H2	F11	D14	F6
H3	G11	D15	G6
H4	H11	D16	H6
H5	A12	D17	I6
H6	B12	D18	J6
H7	C12	D19	K6
H8	D12	D20	L6
H9	E12	D21	M6
H10	F12	D22	N6
H11	G12	D23	O6
H12	H12	D24	P6
		E1	A7
		E2	B7
		E3	C7
		E4	D7
		E5	E7
		E6	F7
		E7	G7
		E8	H7
		E9	I7
		E10	J7
		E11	K7
		E12	L7
		E13	M7
		E14	N7
		E15	O7
		E16	P7
		E17	A8
		E18	B8
		E19	C8
		E20	D8
		E21	E8
		E22	F8
		E23	G8
		E24	H8
		F1	I8
		F2	J8
		F3	K8
		F4	L8
		F5	M8
		F6	N8
		F7	O8
		F8	P8
		F9	A9
		F10	B9
		F11	C9
		F12	D9
		F13	E9
		F14	F9
		F15	G9
		F16	H9
		F17	I9
		F18	J9
		F19	K9
		F20	L9
		F21	M9
		F22	N9
		F23	O9
		F24	P9
		G1	A10
		G2	B10
		G3	C10
		G4	D10
		G5	E10
		G6	F10
		G7	G10
		G8	H10
		G9	I10
		G10	J10
		G11	K10
		G12	L10
		G13	M10
		G14	N10
		G15	O10
		G16	P10
		G17	A11
		G18	B11
		G19	C11
		G20	D11
		G21	E11
		G22	F11
		G23	G11
		G24	H11
		H1	I11
		H2	J11
		H3	K11
		H4	L11
		H5	M11
		H6	N11
		H7	O11
		H8	P11
		H9	A12
		H10	B12
		H11	C12
		H12	D12
		H13	E12
		H14	F12
		H15	G12
		H16	H12
		H17	I12
		H18	J12
		H19	K12
		H20	L12
		H21	M12
		H22	N12
		H23	O12
		H24	P12
		I1	A13
		I2	B13
		I3	C13
		I4	D13
		I5	E13
		I6	F13
		I7	G13
		I8	H13
		I9	I13
		I10	J13
		I11	K13
		I12	L13
		I13	M13
		I14	N13
		I15	O13
		I16	P13
		I17	A14
		I18	B14
		I19	C14
		I20	D14
		I21	E14
		I22	F14
		I23	G14
		I24	H14
		J1	I14
		J2	J14
		J3	K14
		J4	L14
		J5	M14
		J6	N14
		J7	O14
		J8	P14
		J9	A15
		J10	B15
		J11	C15
		J12	D15
		J13	E15
		J14	F15
		J15	G15
		J16	H15
		J17	I15
		J18	J15
		J19	K15
		J20	L15
		J21	M15
		J22	N15
		J23	O15
		J24	P15
		K1	A16
		K2	B16
		K3	C16
		K4	D16
		K5	E16
		K6	F16
		K7	G16
		K8	H16
		K9	I16
		K10	J16
		K11	K16
		K12	L16
		K13	M16
		K14	N16
		K15	O16
		K16	P16
		K17	A17
		K18	B17
		K19	C17
		K20	D17
		K21	E17
		K22	F17
		K23	G17
		K24	H17
		L1	I17
		L2	J17
		L3	K17
		L4	L17
		L5	M17
		L6	N17
		L7	O17
		L8	P17
		L9	A18
		L10	B18
		L11	C18
		L12	D18
		L13	E18
		L14	F18
		L15	G18
		L16	H18
		L17	I18
		L18	J18
		L19	K18
		L20	L18
		L21	M18
		L22	N18
		L23	O18
		L24	P18
		M1	A19
		M2	B19
		M3	C19
		M4	D19
		M5	E19
		M6	F19
		M7	G19
		M8	H19
		M9	I19
		M10	J19
		M11	K19
		M12	L19
		M13	M19
		M14	N19
		M15	O19
		M16	P19
		M17	A20
		M18	B20
		M19	C20
		M20	D20
		M21	E20
		M22	F20
		M23	G20
		M24	H20
		N1	I20
		N2	J20
		N3	K20
		N4	L20
		N5	M20
		N6	N20
		N7	O20
		N8	P20
		N9	A21
		N10	B21
		N11	C21
		N12	D21
		N13	E21
		N14	F21
		N15	G21
		N16	H21
		N17	I21
		N18	J21
		N19	K21
		N20	L21
		N21	M21
		N22	N21
		N23	O21
		N24	P21
		O1	A22
		O2	B22
		O3	C22
		O4	D22
		O5	E22
		O6	F22
		O7	G22
		O8	H22
		O9	I22
		O10	J22
		O11	K22
		O12	L22
		O13	M22
		O14	N22
		O15	O22
		O16	P22
		O17	A23
		O18	B23
		O19	C23
		O20	D23
		O21	E23
		O22	F23
		O23	G23
		O24	H23
		P1	I23
		P2	J23
		P3	K23
		P4	L23
		P5	M23
		P6	N23
		P7	O23
		P8	P23
		P9	A24
		P10	B24
		P11	C24
		P12	D24
		P13	E24
		P14	F24
		P15	G24
		P16	H24
		P17	I24
		P18	J24
		P19	K24
		P20	L24
		P21	M24
		P22	N24
		P23	O24
		P24	P24

## Sheet: Drop-downs
25nm				Full Yield
100nm				nmole/well
250nm
1µm
		No Remainders
Standard Desalting		Plates (dry)				Standard Desalting
PAGE Purification
HPLC Purification		Yes							Standard Desalting
RNase-Free HPLC Purification		No							PAGE Purification
IE-HPLC Purification						Category	Item		HPLC Purification
						Scales			RNase-Free HPLC Purification
Deep Well
V Bottom
PCR									IE-HPLC Purification
Nunc 384 Well Plate
384 Axygen Deep Well
Other - See Special Instructions						25nm	Purification List	Purification List
						100nm	Standard Desalting	Standard Desalting
Rows [A01,A02,A03]						250nm		PAGE Purification
Columns [A01,B01,C01]						1µm		HPLC Purification
Forward/Reverse Mixed in Wells								RNase-Free HPLC Purification
								IE-HPLC Purification
Ship Wet
Ship Dry
Printed
Email						96-well V-bottom
Both						96-well PCR
						384 Axygen Deep Well
N/A						Quantity Only
IDTE Buffer pH 7.5 (10mM Tris-HCl, 0.1mM EDTA)						Concentration & Quantity
IDTE Buffer pH 8.0 (10mM Tris-HCl, 0.1mM EDTA)
RNase-Free Water
Other
YES
NO
2 nm				Full Yield
10 nm				nmole/well
40 nm
		No Remainders
Affinity		Plates (dry)				Standard Desalting
Standard Desaltinging
PAGE Purification		Yes							Standard Desalting
HPLC Purification		No							PAGE Purification
RNase-Free HPLC Purification						Category	Item		HPLC Purification
						Scales			RNase-Free HPLC Purification
Deep Well
V Bottom		2 nmole Screening DsiRNA Plate Duplex (24-30 bases)
Other		10 nmole Screening DsiRNA Plate Duplex (24-30 bases)							IE-HPLC Purification
		100 nmole DNA Duplex oligo
		250 nmole DNA Duplex oligo
		1 µmole DNA Duplex oligo				25nm	Purification List	Purification List
		100 nmole RNA Duplex oligo
		250 nmole RNA Duplex oligo				100nm	Standard Desalting	Standard Desalting
Rows [A01,A02,A03]		1 µmole RNA Duplex oligo				250nm		PAGE Purification
Columns [A01,B01,C01]		2 nmole RNAi Duplex (18-23 bases)				1µm		HPLC Purification
		10 nmole RNAi Duplex (18-23 bases)						RNase-Free HPLC Purification
								IE-HPLC Purification
Ship Wet
Ship Dry
Full Yield
Volume Only
Quantity Only
Concentration Only
Concentration And Volume
Concentration And Quantity
Volume And Quantity
Quantity Only
Concentration And Volume
Concentration And Quantity
Volume And Quantity
Standard Desalting
2
3
4
5
6
7
8
9
10
