# Supplementary material for: Massive variation of short tandem repeats with functional consequences across strains of Arabidopsis thaliana
Source: HighWire-hosted journal article supplement (doi:10.1101/gr.231753.117), 2018-07-03
Supplement: Supplemental_File_S4.zip [file last_tdna_010317_design.xlsx]

## Sheet: last_tdna_010317.csv
seedling_number	genotype_label	plate_number	tray_row	tray_col	RLN	DTF	note
1	1	1	1	1	11	33	weird
2	2	1	1	2	10	28	weird
3	1	1	1	3	11	31
4	2	1	1	4	12	30
5	1	1	1	5	13	30
6	2	1	1	6	11	29
7	1	1	1	7	11	29
8	2	1	1	8	NA	NA	weird
9	1	1	1	9	NA	NA	weird
10	2	1	2	1	NA	NA	weird
11	1	1	2	2	12	29
12	2	1	2	3	14	31
13	1	1	2	4	10	27
14	2	1	2	5	11	28
15	1	1	2	6	13	31
16	2	1	2	7	12	28
17	1	1	2	8	13	31
18	2	1	2	9	12	33
19	1	1	3	1	NA	NA	weird
20	2	1	3	2	11	29
21	1	1	3	3	12	29
22	2	1	3	4	12	28
23	1	1	3	5	11	26
24	2	1	3	6	12	27
25	1	1	3	7	13	29
26	2	1	3	8	12	28
27	1	1	3	9	13	33
28	2	1	4	1	11	27
29	1	1	4	2	10	27	weird
30	2	1	4	3	12	29
31	1	1	4	4	10	29
32	2	1	4	5	11	27
33	1	1	4	6	12	34	weird
34	2	1	4	7	10	29	weird
35	1	1	4	8	12	29
36	2	1	4	9	12	34	weird

## Sheet: mapping
mapping of randomized keys to genotypes:
1	Col
2	CS66521
