# Supplementary material for: Massive variation of short tandem repeats with functional consequences across strains of Arabidopsis thaliana
Source: HighWire-hosted journal article supplement (doi:10.1101/gr.231753.117), 2018-07-03
Supplement: Supplemental_File_S4.zip [file last_tdnas_strwa_031317.xlsx]

## Sheet: last_tdnas_strwa_031317.csv
seedling_number	genotype_label	tray_number	tray_row	tray_col	treatment	RLN	DTF	notes
1	1	1	1	1		13	33
2	2	1	1	2		17	37		14.2	32.8667	14
3	3	1	1	3		14	30		15.2667	33.6667	12
4	4	1	1	4		14	30		15.8667	34.6	11
5	1	1	1	5		NA	NA		15.1875	34.0625	12
6	2	1	1	6		NA	NA
7	3	1	1	7		12	30
8	4	1	1	8		15	32
9	1	1	1	9		12	29
10	2	1	1	10		15	31
11	3	1	1	11		NA	NA
12	4	1	1	12		NA	NA
13	2	1	2	1		13	31
14	3	1	2	2		16	35
15	4	1	2	3		13	31
16	1	1	2	4		14	30
17	2	1	2	5		15	31
18	3	1	2	6		13	31
19	4	1	2	7		12	29
20	1	1	2	8		14	31
21	2	1	2	9		16	36
22	3	1	2	10		18	40
23	4	1	2	11		17	39
24	1	1	2	12		NA	NA
25	3	1	3	1		16	34
26	4	1	3	2		17	37
27	1	1	3	3		17	41
28	2	1	3	4		16	37
29	3	1	3	5		18	41
30	4	1	3	6		17	35
31	1	1	3	7		12	31
32	2	1	3	8		19	43	late
33	3	1	3	9		19	37
34	4	1	3	10		13	32
35	1	1	3	11		13	31
36	2	1	3	12		14	30
37	4	1	4	1		13	31
38	1	1	4	2		12	32
39	2	1	4	3		17	36
40	3	1	4	4		20	40
41	4	1	4	5		19	37
42	1	1	4	6		14	31
43	2	1	4	7		NA	NA	very late
44	3	1	4	8		16	35
45	4	1	4	9		16	35
46	1	1	4	10		14	32
47	2	1	4	11		15	35
48	3	1	4	12		NA	NA
49	1	1	5	1		14	31
50	2	1	5	2		16	33
51	3	1	5	3		16	33
52	4	1	5	4		17	42	late
53	1	1	5	5		18	40
54	2	1	5	6		12	30
55	3	1	5	7		14	31
56	4	1	5	8		17	37
57	1	1	5	9		15	33
58	2	1	5	10		15	31
59	3	1	5	11		14	32
60	4	1	5	12		NA	NA
61	2	1	6	1		15	33
62	3	1	6	2		17	36
63	4	1	6	3		15	33
64	1	1	6	4		13	29
65	2	1	6	5		NA	NA	doubledmeristem-"siamese"
66	3	1	6	6		NA	NA
67	4	1	6	7		12	29
68	1	1	6	8		18	39
69	2	1	6	9		14	31
70	3	1	6	10		15	34
71	4	1	6	11		16	36
72	1	1	6	12

## Sheet: mapping
	mapping of randomized keys to genotypes:
1	SALK_121005C
2	Col
3	CS66521
4	SALK113736
