# Supplementary material for: Massive variation of short tandem repeats with functional consequences across strains of Arabidopsis thaliana
Source: HighWire-hosted journal article supplement (doi:10.1101/gr.231753.117), 2018-07-03
Supplement: Supplemental_File_S4.zip [file Mip validation primers_ashley.xlsx]

## Sheet: Sheet1
Primer	Sequence	pdt size
25822 F primer	cttgtgctttcatcttagaatc	173bp
25822 R primer	attccctctgagattccactc	173bp
78534 F primer	CTGCAAAAGTTTCATCTTCATC	181bp
78534 R primer	GAGATAATATTTCACCCAGAGA	181bp
81231 F primer	GTTCCCATATATTTCTTTGACAC	147bp
81231 R primer	GATATTGATGGTGACATAGACC	147bp
52814 F primer	GTTATTTGAGAATTCTCTGTTTG	146bp
52814 R primer	GTAGCCAGCTCAAAAAGTGTA	146bp
