# Supplementary material for: Massive variation of short tandem repeats with functional consequences across strains of Arabidopsis thaliana
Source: HighWire-hosted journal article supplement (doi:10.1101/gr.231753.117), 2018-07-03
Supplement: Supplemental_File_S4.zip [file MIP_BC_PRIMERS_REV_96_upload.xls]

## Sheet: Sheet1
WellPosition	Name	Sequence
A01	SLXA_PE_MIPBC2_REV_001	CAAGCAGAAGACGGCATACGAGATGTTAAGACACACGCACGATCCGACGGTAGTGT
B01	SLXA_PE_MIPBC2_REV_002	CAAGCAGAAGACGGCATACGAGATTCTAAGTTACACGCACGATCCGACGGTAGTGT
C01	SLXA_PE_MIPBC2_REV_003	CAAGCAGAAGACGGCATACGAGATTGTACATTACACGCACGATCCGACGGTAGTGT
D01	SLXA_PE_MIPBC2_REV_004	CAAGCAGAAGACGGCATACGAGATAATACCGCACACGCACGATCCGACGGTAGTGT
E01	SLXA_PE_MIPBC2_REV_005	CAAGCAGAAGACGGCATACGAGATTGTCTATGACACGCACGATCCGACGGTAGTGT
F01	SLXA_PE_MIPBC2_REV_006	CAAGCAGAAGACGGCATACGAGATTCACTGTTACACGCACGATCCGACGGTAGTGT
G01	SLXA_PE_MIPBC2_REV_007	CAAGCAGAAGACGGCATACGAGATTTGTATTCACACGCACGATCCGACGGTAGTGT
H01	SLXA_PE_MIPBC2_REV_008	CAAGCAGAAGACGGCATACGAGATAGACTAACACACGCACGATCCGACGGTAGTGT
A02	SLXA_PE_MIPBC2_REV_009	CAAGCAGAAGACGGCATACGAGATATTGTCAAACACGCACGATCCGACGGTAGTGT
B02	SLXA_PE_MIPBC2_REV_010	CAAGCAGAAGACGGCATACGAGATGTTCTACAACACGCACGATCCGACGGTAGTGT
C02	SLXA_PE_MIPBC2_REV_011	CAAGCAGAAGACGGCATACGAGATTTCATTCGACACGCACGATCCGACGGTAGTGT
D02	SLXA_PE_MIPBC2_REV_012	CAAGCAGAAGACGGCATACGAGATAAGCGTCAACACGCACGATCCGACGGTAGTGT
E02	SLXA_PE_MIPBC2_REV_013	CAAGCAGAAGACGGCATACGAGATCGTAGGATACACGCACGATCCGACGGTAGTGT
F02	SLXA_PE_MIPBC2_REV_014	CAAGCAGAAGACGGCATACGAGATAGTTAGCGACACGCACGATCCGACGGTAGTGT
G02	SLXA_PE_MIPBC2_REV_015	CAAGCAGAAGACGGCATACGAGATGAACGTCTACACGCACGATCCGACGGTAGTGT
H02	SLXA_PE_MIPBC2_REV_016	CAAGCAGAAGACGGCATACGAGATAGAACACTACACGCACGATCCGACGGTAGTGT
A03	SLXA_PE_MIPBC2_REV_017	CAAGCAGAAGACGGCATACGAGATTGTTGGCAACACGCACGATCCGACGGTAGTGT
B03	SLXA_PE_MIPBC2_REV_018	CAAGCAGAAGACGGCATACGAGATGGCTAATAACACGCACGATCCGACGGTAGTGT
C03	SLXA_PE_MIPBC2_REV_019	CAAGCAGAAGACGGCATACGAGATGCTAGAATACACGCACGATCCGACGGTAGTGT
D03	SLXA_PE_MIPBC2_REV_020	CAAGCAGAAGACGGCATACGAGATTGTACTAAACACGCACGATCCGACGGTAGTGT
E03	SLXA_PE_MIPBC2_REV_021	CAAGCAGAAGACGGCATACGAGATAGTTACACACACGCACGATCCGACGGTAGTGT
F03	SLXA_PE_MIPBC2_REV_022	CAAGCAGAAGACGGCATACGAGATGTACACGAACACGCACGATCCGACGGTAGTGT
G03	SLXA_PE_MIPBC2_REV_023	CAAGCAGAAGACGGCATACGAGATACTGTAAGACACGCACGATCCGACGGTAGTGT
H03	SLXA_PE_MIPBC2_REV_024	CAAGCAGAAGACGGCATACGAGATGATCATGAACACGCACGATCCGACGGTAGTGT
A04	SLXA_PE_MIPBC2_REV_025	CAAGCAGAAGACGGCATACGAGATTGCTAACGACACGCACGATCCGACGGTAGTGT
B04	SLXA_PE_MIPBC2_REV_026	CAAGCAGAAGACGGCATACGAGATTAATGCTCACACGCACGATCCGACGGTAGTGT
C04	SLXA_PE_MIPBC2_REV_027	CAAGCAGAAGACGGCATACGAGATCTTGTTGAACACGCACGATCCGACGGTAGTGT
D04	SLXA_PE_MIPBC2_REV_028	CAAGCAGAAGACGGCATACGAGATGATACAAGACACGCACGATCCGACGGTAGTGT
E04	SLXA_PE_MIPBC2_REV_029	CAAGCAGAAGACGGCATACGAGATATACAGCGACACGCACGATCCGACGGTAGTGT
F04	SLXA_PE_MIPBC2_REV_030	CAAGCAGAAGACGGCATACGAGATCTGGATAGACACGCACGATCCGACGGTAGTGT
G04	SLXA_PE_MIPBC2_REV_031	CAAGCAGAAGACGGCATACGAGATTCATCAGCACACGCACGATCCGACGGTAGTGT
H04	SLXA_PE_MIPBC2_REV_032	CAAGCAGAAGACGGCATACGAGATTTATACCGACACGCACGATCCGACGGTAGTGT
A05	SLXA_PE_MIPBC2_REV_033	CAAGCAGAAGACGGCATACGAGATGCTGATTCACACGCACGATCCGACGGTAGTGT
B05	SLXA_PE_MIPBC2_REV_034	CAAGCAGAAGACGGCATACGAGATATAAGGCCACACGCACGATCCGACGGTAGTGT
C05	SLXA_PE_MIPBC2_REV_035	CAAGCAGAAGACGGCATACGAGATAAGACTAGACACGCACGATCCGACGGTAGTGT
D05	SLXA_PE_MIPBC2_REV_036	CAAGCAGAAGACGGCATACGAGATTAGCAACAACACGCACGATCCGACGGTAGTGT
E05	SLXA_PE_MIPBC2_REV_037	CAAGCAGAAGACGGCATACGAGATCAAGTAATACACGCACGATCCGACGGTAGTGT
F05	SLXA_PE_MIPBC2_REV_038	CAAGCAGAAGACGGCATACGAGATTCATGATGACACGCACGATCCGACGGTAGTGT
G05	SLXA_PE_MIPBC2_REV_039	CAAGCAGAAGACGGCATACGAGATTAGCTCTTACACGCACGATCCGACGGTAGTGT
H05	SLXA_PE_MIPBC2_REV_040	CAAGCAGAAGACGGCATACGAGATACTACATGACACGCACGATCCGACGGTAGTGT
A06	SLXA_PE_MIPBC2_REV_041	CAAGCAGAAGACGGCATACGAGATTGTGCCATACACGCACGATCCGACGGTAGTGT
B06	SLXA_PE_MIPBC2_REV_042	CAAGCAGAAGACGGCATACGAGATGACTTCCAACACGCACGATCCGACGGTAGTGT
C06	SLXA_PE_MIPBC2_REV_043	CAAGCAGAAGACGGCATACGAGATTATTCTCGACACGCACGATCCGACGGTAGTGT
D06	SLXA_PE_MIPBC2_REV_044	CAAGCAGAAGACGGCATACGAGATCACTAGATACACGCACGATCCGACGGTAGTGT
E06	SLXA_PE_MIPBC2_REV_045	CAAGCAGAAGACGGCATACGAGATCTTCGCATACACGCACGATCCGACGGTAGTGT
F06	SLXA_PE_MIPBC2_REV_046	CAAGCAGAAGACGGCATACGAGATCTAGCGATACACGCACGATCCGACGGTAGTGT
G06	SLXA_PE_MIPBC2_REV_047	CAAGCAGAAGACGGCATACGAGATTACGTTAAACACGCACGATCCGACGGTAGTGT
H06	SLXA_PE_MIPBC2_REV_048	CAAGCAGAAGACGGCATACGAGATAAGTAGTCACACGCACGATCCGACGGTAGTGT
A07	SLXA_PE_MIPBC2_REV_049	CAAGCAGAAGACGGCATACGAGATGACGTATCACACGCACGATCCGACGGTAGTGT
B07	SLXA_PE_MIPBC2_REV_050	CAAGCAGAAGACGGCATACGAGATACGTTCAGACACGCACGATCCGACGGTAGTGT
C07	SLXA_PE_MIPBC2_REV_051	CAAGCAGAAGACGGCATACGAGATAGCTATATACACGCACGATCCGACGGTAGTGT
D07	SLXA_PE_MIPBC2_REV_052	CAAGCAGAAGACGGCATACGAGATAGTGCGAAACACGCACGATCCGACGGTAGTGT
E07	SLXA_PE_MIPBC2_REV_053	CAAGCAGAAGACGGCATACGAGATCAATGGTAACACGCACGATCCGACGGTAGTGT
F07	SLXA_PE_MIPBC2_REV_054	CAAGCAGAAGACGGCATACGAGATATTCCGATACACGCACGATCCGACGGTAGTGT
G07	SLXA_PE_MIPBC2_REV_055	CAAGCAGAAGACGGCATACGAGATAGCTGTTGACACGCACGATCCGACGGTAGTGT
H07	SLXA_PE_MIPBC2_REV_056	CAAGCAGAAGACGGCATACGAGATTTCGACTCACACGCACGATCCGACGGTAGTGT
A08	SLXA_PE_MIPBC2_REV_057	CAAGCAGAAGACGGCATACGAGATCGAATGGTACACGCACGATCCGACGGTAGTGT
B08	SLXA_PE_MIPBC2_REV_058	CAAGCAGAAGACGGCATACGAGATTAGTGTACACACGCACGATCCGACGGTAGTGT
C08	SLXA_PE_MIPBC2_REV_059	CAAGCAGAAGACGGCATACGAGATACGCATGAACACGCACGATCCGACGGTAGTGT
D08	SLXA_PE_MIPBC2_REV_060	CAAGCAGAAGACGGCATACGAGATTTCGTACAACACGCACGATCCGACGGTAGTGT
E08	SLXA_PE_MIPBC2_REV_061	CAAGCAGAAGACGGCATACGAGATTTCTGCTAACACGCACGATCCGACGGTAGTGT
F08	SLXA_PE_MIPBC2_REV_062	CAAGCAGAAGACGGCATACGAGATTGGAAGCAACACGCACGATCCGACGGTAGTGT
G08	SLXA_PE_MIPBC2_REV_063	CAAGCAGAAGACGGCATACGAGATGATGCTCAACACGCACGATCCGACGGTAGTGT
H08	SLXA_PE_MIPBC2_REV_064	CAAGCAGAAGACGGCATACGAGATAGCCTGAAACACGCACGATCCGACGGTAGTGT
A09	SLXA_PE_MIPBC2_REV_065	CAAGCAGAAGACGGCATACGAGATCACCAGTAACACGCACGATCCGACGGTAGTGT
B09	SLXA_PE_MIPBC2_REV_066	CAAGCAGAAGACGGCATACGAGATGTTACACCACACGCACGATCCGACGGTAGTGT
C09	SLXA_PE_MIPBC2_REV_067	CAAGCAGAAGACGGCATACGAGATGCGTTAGTACACGCACGATCCGACGGTAGTGT
D09	SLXA_PE_MIPBC2_REV_068	CAAGCAGAAGACGGCATACGAGATTGACGTTCACACGCACGATCCGACGGTAGTGT
E09	SLXA_PE_MIPBC2_REV_069	CAAGCAGAAGACGGCATACGAGATTAGGCGTAACACGCACGATCCGACGGTAGTGT
F09	SLXA_PE_MIPBC2_REV_070	CAAGCAGAAGACGGCATACGAGATAAGTGAGCACACGCACGATCCGACGGTAGTGT
G09	SLXA_PE_MIPBC2_REV_071	CAAGCAGAAGACGGCATACGAGATCCGGAATAACACGCACGATCCGACGGTAGTGT
H09	SLXA_PE_MIPBC2_REV_072	CAAGCAGAAGACGGCATACGAGATAATAGGCAACACGCACGATCCGACGGTAGTGT
A10	SLXA_PE_MIPBC2_REV_073	CAAGCAGAAGACGGCATACGAGATTTCAGGTCACACGCACGATCCGACGGTAGTGT
B10	SLXA_PE_MIPBC2_REV_074	CAAGCAGAAGACGGCATACGAGATTAATCGCTACACGCACGATCCGACGGTAGTGT
C10	SLXA_PE_MIPBC2_REV_075	CAAGCAGAAGACGGCATACGAGATCTTAGGTGACACGCACGATCCGACGGTAGTGT
D10	SLXA_PE_MIPBC2_REV_076	CAAGCAGAAGACGGCATACGAGATTTGATCTCACACGCACGATCCGACGGTAGTGT
E10	SLXA_PE_MIPBC2_REV_077	CAAGCAGAAGACGGCATACGAGATTCTTACTGACACGCACGATCCGACGGTAGTGT
F10	SLXA_PE_MIPBC2_REV_078	CAAGCAGAAGACGGCATACGAGATGAGTACACACACGCACGATCCGACGGTAGTGT
G10	SLXA_PE_MIPBC2_REV_079	CAAGCAGAAGACGGCATACGAGATACGTTACAACACGCACGATCCGACGGTAGTGT
H10	SLXA_PE_MIPBC2_REV_080	CAAGCAGAAGACGGCATACGAGATTGGTAAGCACACGCACGATCCGACGGTAGTGT
A11	SLXA_PE_MIPBC2_REV_081	CAAGCAGAAGACGGCATACGAGATGATAGCACACACGCACGATCCGACGGTAGTGT
B11	SLXA_PE_MIPBC2_REV_082	CAAGCAGAAGACGGCATACGAGATGACTTAGGACACGCACGATCCGACGGTAGTGT
C11	SLXA_PE_MIPBC2_REV_083	CAAGCAGAAGACGGCATACGAGATAGTCGTTAACACGCACGATCCGACGGTAGTGT
D11	SLXA_PE_MIPBC2_REV_084	CAAGCAGAAGACGGCATACGAGATCGTGATTAACACGCACGATCCGACGGTAGTGT
E11	SLXA_PE_MIPBC2_REV_085	CAAGCAGAAGACGGCATACGAGATTCAGTAGAACACGCACGATCCGACGGTAGTGT
F11	SLXA_PE_MIPBC2_REV_086	CAAGCAGAAGACGGCATACGAGATATGTGTCTACACGCACGATCCGACGGTAGTGT
G11	SLXA_PE_MIPBC2_REV_087	CAAGCAGAAGACGGCATACGAGATCAGAATATACACGCACGATCCGACGGTAGTGT
H11	SLXA_PE_MIPBC2_REV_088	CAAGCAGAAGACGGCATACGAGATTAAGTCTGACACGCACGATCCGACGGTAGTGT
A12	SLXA_PE_MIPBC2_REV_089	CAAGCAGAAGACGGCATACGAGATATCGACATACACGCACGATCCGACGGTAGTGT
B12	SLXA_PE_MIPBC2_REV_090	CAAGCAGAAGACGGCATACGAGATACAGCTGTACACGCACGATCCGACGGTAGTGT
C12	SLXA_PE_MIPBC2_REV_091	CAAGCAGAAGACGGCATACGAGATATCACAAGACACGCACGATCCGACGGTAGTGT
D12	SLXA_PE_MIPBC2_REV_092	CAAGCAGAAGACGGCATACGAGATGTCGAATTACACGCACGATCCGACGGTAGTGT
E12	SLXA_PE_MIPBC2_REV_093	CAAGCAGAAGACGGCATACGAGATTGCCGATTACACGCACGATCCGACGGTAGTGT
F12	SLXA_PE_MIPBC2_REV_094	CAAGCAGAAGACGGCATACGAGATACTAATGCACACGCACGATCCGACGGTAGTGT
G12	SLXA_PE_MIPBC2_REV_095	CAAGCAGAAGACGGCATACGAGATCTAGTAGGACACGCACGATCCGACGGTAGTGT
H12	SLXA_PE_MIPBC2_REV_096	CAAGCAGAAGACGGCATACGAGATTTAAGCCAACACGCACGATCCGACGGTAGTGT
