# Supplementary material for: Massive variation of short tandem repeats with functional consequences across strains of Arabidopsis thaliana
Source: HighWire-hosted journal article supplement (doi:10.1101/gr.231753.117), 2018-07-03
Supplement: Supplemental_File_S4.zip [file MIP_lib_Athnew2100_samplesheet_2016.xlsx]

## Sheet: sample_sheet
Strain	Region(1001genomes)	barcode ID (SLXA_PE_MIPBC)	barcode (RC of primer)	hyb date	hyb length	300bp band intensity?	pcr cycles	ELF3 STR checked (gel, #41/42)?	demultiplexed_reads	other notes	repeat?	ul in lib pool?	ul added 8/3/16	spikein_file	num_spikein_reads	spikiein_zscore	adjusted_pool_input	average	sd	BC_primer_name	Sequence	Barcode_sequence	Barcode_reverse_complement_sequence_(present_index_reads)
Col	North_america	1A	GTTAAGAC	2016-05-31	6h	high	25	yes	1996654	spike-in check 6/7/16 looks good		4	4 new	max-1_S1_R1_001.fastq.gz	11036	-0.621755	10.8989	30070.1	30613.4	SLXA_PE_MIPBC2_REV_001	CAAGCAGAAGACGGCATACGAGATGTTAAGACACACGCACGATCCGACGGTAGTGT	GTTAAGAC	GTCTTAAC
Bur-0	British_isles	1B	TCTAAGTT	2016-05-31	6h	very high	25	yes	2075081	spike-in check 6/7/16 looks good		2	4 new	max-2_S2_R1_001.fastq.gz	6877	-0.757611	8.74511	30070.1	30613.4	SLXA_PE_MIPBC2_REV_002	CAAGCAGAAGACGGCATACGAGATTCTAAGTTACACGCACGATCCGACGGTAGTGT	TCTAAGTT	AACTTAGA
CIBC-17	British_isles	1C	TGTACATT	2016-05-31	6h	very high	25	yes	2241577			2	4 new	max-3_S3_R1_001.fastq.gz	9646	-0.66716	6.23472	30070.1	30613.4	SLXA_PE_MIPBC2_REV_003	CAAGCAGAAGACGGCATACGAGATTGTACATTACACGCACGATCCGACGGTAGTGT	TGTACATT	AATGTACA
Ga-0	West_europe	1D	AATACCGC	2016-05-31	6h	very high	25	yes	1836433			2	4 new	max-4_S4_R1_001.fastq.gz	11813	-0.596374	5.09101	30070.1	30613.4	SLXA_PE_MIPBC2_REV_004	CAAGCAGAAGACGGCATACGAGATAATACCGCACACGCACGATCCGACGGTAGTGT	AATACCGC	GCGGTATT
HR-10	British_isles	1E	TGTCTATG	2016-05-31	6h	very high	25	yes	2199476			2	4 new	max-5_S5_R1_001.fastq.gz	12510	-0.573607	4.80736	30070.1	30613.4	SLXA_PE_MIPBC2_REV_005	CAAGCAGAAGACGGCATACGAGATTGTCTATGACACGCACGATCCGACGGTAGTGT	TGTCTATG	CATAGACA
Mrk-0	West_europe	1F	TCACTGTT	2016-05-31	6h	high	25	yes	1676893	4x too much dna on accident		4	2 new	max-6_S6_R1_001.fastq.gz	23307	-0.220918	5.16069	30070.1	30613.4	SLXA_PE_MIPBC2_REV_006	CAAGCAGAAGACGGCATACGAGATTCACTGTTACACGCACGATCCGACGGTAGTGT	TCACTGTT	AACAGTGA
PNA-10	North_america	1G	TTGTATTC	2016-05-31	6h	mid	25	yes	1985629			4	4 new	max-7_S7_R1_001.fastq.gz	12184	-0.584255	9.87198	30070.1	30613.4	SLXA_PE_MIPBC2_REV_007	CAAGCAGAAGACGGCATACGAGATTTGTATTCACACGCACGATCCGACGGTAGTGT	TTGTATTC	GAATACAA
Var2-1	Scandinavia	1H	AGACTAAC	2016-06-22	6h	okay	25	yes	1154427	redid after zymo	done	6		max-8_S8_R1_001.fastq.gz	31430	0.0444229	5.74039	30070.1	30613.4	SLXA_PE_MIPBC2_REV_008	CAAGCAGAAGACGGCATACGAGATAGACTAACACACGCACGATCCGACGGTAGTGT	AGACTAAC	GTTAGTCT
Fei-0	South_europe	2A	ATTGTCAA	2016-06-02	6h	high	25		1950862		REDO?	4	5 new	max-9_S9_R1_001.fastq.gz	178	-0.976436	1013.6	30070.1	30613.4	SLXA_PE_MIPBC2_REV_009	CAAGCAGAAGACGGCATACGAGATATTGTCAAACACGCACGATCCGACGGTAGTGT	ATTGTCAA	TTGACAAT
Mr-0	South_europe	2B	GTTCTACA	2016-06-02	6h	high	25		2147955		REDO?	4	5 new	max-10_S10_R1_001.fastq.gz	156	-0.977155	771.027	30070.1	30613.4	SLXA_PE_MIPBC2_REV_010	CAAGCAGAAGACGGCATACGAGATGTTCTACAACACGCACGATCCGACGGTAGTGT	GTTCTACA	TGTAGAAC
Omo2-1	Scandinavia	2C	TTCATTCG	2016-06-02	6h	high	25		2073289		REDO?	4	5 new	max-11_S11_R1_001.fastq.gz	671	-0.960332	179.255	30070.1	30613.4	SLXA_PE_MIPBC2_REV_011	CAAGCAGAAGACGGCATACGAGATTTCATTCGACACGCACGATCCGACGGTAGTGT	TTCATTCG	CGAATGAA
Pu2-7	East_europe	2D	AAGCGTCA	2016-06-02	6h	high	25		1993609		REDO?	4	5 new	max-12_S12_R1_001.fastq.gz	1341	-0.938446	89.6944	30070.1	30613.4	SLXA_PE_MIPBC2_REV_012	CAAGCAGAAGACGGCATACGAGATAAGCGTCAACACGCACGATCCGACGGTAGTGT	AAGCGTCA	TGACGCTT
Ren-11	West_europe	2E	CGTAGGAT	2016-06-02	6h	high	25		1893193		REDO?	4	5 new	max-13_S13_R1_001.fastq.gz	191	-0.976012	629.74	30070.1	30613.4	SLXA_PE_MIPBC2_REV_013	CAAGCAGAAGACGGCATACGAGATCGTAGGATACACGCACGATCCGACGGTAGTGT	CGTAGGAT	ATCCTACG
Rrs-7	North_america	2F	AGTTAGCG	2016-06-02	6h	high	25		1681638		REDO?	4	5 new	max-14_S14_R1_001.fastq.gz	1025	-0.948769	117.347	30070.1	30613.4	SLXA_PE_MIPBC2_REV_014	CAAGCAGAAGACGGCATACGAGATAGTTAGCGACACGCACGATCCGACGGTAGTGT	AGTTAGCG	CGCTAACT
Ts-5	South_europe	2G	GAACGTCT	2016-06-02	6h	high	25		2422435		REDO?	4	5 new	max-15_S15_R1_001.fastq.gz	3519	-0.867301	34.1802	30070.1	30613.4	SLXA_PE_MIPBC2_REV_015	CAAGCAGAAGACGGCATACGAGATGAACGTCTACACGCACGATCCGACGGTAGTGT	GAACGTCT	AGACGTTC
Van-0	North_america	2H	AGAACACT	2016-07-04	6h	very high	25		939100	redid after zymo		4	8 old	max-16_S16_R1_001.fastq.gz	10193	-0.649292	11.8003	30070.1	30613.4	SLXA_PE_MIPBC2_REV_016	CAAGCAGAAGACGGCATACGAGATAGAACACTACACGCACGATCCGACGGTAGTGT	AGAACACT	AGTGTTCT
Ag-0	West_europe	3A	TGTTGGCA	2016-06-13	3h	okay	25		962418	redid 6/7/16 hybs		6		max-17_S17_R1_001.fastq.gz	26724	-0.1093	4.50083	30070.1	30613.4	SLXA_PE_MIPBC2_REV_017	CAAGCAGAAGACGGCATACGAGATTGTTGGCAACACGCACGATCCGACGGTAGTGT	TGTTGGCA	TGCCAACA
Br-0	East_europe	3B	GGCTAATA	2016-06-13	3h	okay	25		1347638	redid 6/7/16 hybs		6		max-18_S18_R1_001.fastq.gz	31055	0.0321734	5.8097	30070.1	30613.4	SLXA_PE_MIPBC2_REV_018	CAAGCAGAAGACGGCATACGAGATGGCTAATAACACGCACGATCCGACGGTAGTGT	GGCTAATA	TATTAGCC
Bil-5	Scandinavia	3C	GCTAGAAT	2016-06-13	3h	okay	25		1213599	redid 6/7/16 hybs		6		max-19_S19_R1_001.fastq.gz	27911	-0.0705267	6.46413	30070.1	30613.4	SLXA_PE_MIPBC2_REV_019	CAAGCAGAAGACGGCATACGAGATGCTAGAATACACGCACGATCCGACGGTAGTGT	GCTAGAAT	ATTCTAGC
Bil-7	Scandinavia	3D	TGTACTAA	2016-06-13	3h	okay	25		1343580	redid 6/7/16 hybs		6		max-20_S20_R1_001.fastq.gz	30119	0.00159856	5.99025	30070.1	30613.4	SLXA_PE_MIPBC2_REV_020	CAAGCAGAAGACGGCATACGAGATTGTACTAAACACGCACGATCCGACGGTAGTGT	TGTACTAA	TTAGTACA
Bor-1	East_europe	3E	AGTTACAC	2016-06-13	3h	high	25		1036562	redid 6/7/16 hybs		4		max-21_S21_R1_001.fastq.gz	28648	-0.0464522	6.29783	30070.1	30613.4	SLXA_PE_MIPBC2_REV_021	CAAGCAGAAGACGGCATACGAGATAGTTACACACACGCACGATCCGACGGTAGTGT	AGTTACAC	GTGTAACT
Bor-4	East_europe	3F	GTACACGA	2016-06-13	3h	high	25		919269	redid 6/7/16 hybs		4		max-22_S22_R1_001.fastq.gz	26973	-0.101167	4.45928	30070.1	30613.4	SLXA_PE_MIPBC2_REV_022	CAAGCAGAAGACGGCATACGAGATGTACACGAACACGCACGATCCGACGGTAGTGT	GTACACGA	TCGTGTAC
Sq-1	British_isles	3G	ACTGTAAG	2016-06-13	3h	high	25		956004	redid 6/7/16 hybs		4		max-23_S23_R1_001.fastq.gz	26593	-0.11358	4.523	30070.1	30613.4	SLXA_PE_MIPBC2_REV_023	CAAGCAGAAGACGGCATACGAGATACTGTAAGACACGCACGATCCGACGGTAGTGT	ACTGTAAG	CTTACAGT
Ull2-3	Scandinavia	3H	GATCATGA	2016-06-13	3h	high	25		1290015	redid 6/7/16 hybs		4	2 old	max-24_S24_R1_001.fastq.gz	22444	-0.249108	5.35913	30070.1	30613.4	SLXA_PE_MIPBC2_REV_024	CAAGCAGAAGACGGCATACGAGATGATCATGAACACGCACGATCCGACGGTAGTGT	GATCATGA	TCATGATC
C24	South_europe	4A	TGCTAACG	2016-06-13	6h	high	25		1071102			4	2 old	max-25_S25_R1_001.fastq.gz	18982	-0.362196	6.33654	30070.1	30613.4	SLXA_PE_MIPBC2_REV_025	CAAGCAGAAGACGGCATACGAGATTGCTAACGACACGCACGATCCGACGGTAGTGT	TGCTAACG	CGTTAGCA
CIBC-5	British_isles	4B	TAATGCTC	2016-06-13	6h	high	25		1025847			4	2 old	max-26_S26_R1_001.fastq.gz	22279	-0.254498	5.39882	30070.1	30613.4	SLXA_PE_MIPBC2_REV_026	CAAGCAGAAGACGGCATACGAGATTAATGCTCACACGCACGATCCGACGGTAGTGT	TAATGCTC	GAGCATTA
N13	East_europe	4C	CTTGTTGA	2016-06-13	6h	high	25		1226458			4	2 old	max-27_S27_R1_001.fastq.gz	22155	-0.258549	5.42903	30070.1	30613.4	SLXA_PE_MIPBC2_REV_027	CAAGCAGAAGACGGCATACGAGATCTTGTTGAACACGCACGATCCGACGGTAGTGT	CTTGTTGA	TCAACAAG
Ct-1	South_europe	4D	GATACAAG	2016-06-13	6h	high	25		1215822			4	2 old	max-28_S28_R1_001.fastq.gz	20328	-0.318228	5.91697	30070.1	30613.4	SLXA_PE_MIPBC2_REV_028	CAAGCAGAAGACGGCATACGAGATGATACAAGACACGCACGATCCGACGGTAGTGT	GATACAAG	CTTGTATC
Est-1	East_europe	4E	ATACAGCG	2016-06-13	6h	okay	25		860248	[weird INDX overlap in spikein-fudged]		6		max-29_S29_R1_001.fastq.gz	30000	-0.00228862	4.00934	30070.1	30613.4	SLXA_PE_MIPBC2_REV_029	CAAGCAGAAGACGGCATACGAGATATACAGCGACACGCACGATCCGACGGTAGTGT	ATACAGCG	CGCTGTAT
Eden-2	Scandinavia	4F	CTGGATAG	2016-06-13	6h	okay	25		897182			6		max-30_S30_R1_001.fastq.gz	27188	-0.0941437	6.63603	30070.1	30613.4	SLXA_PE_MIPBC2_REV_030	CAAGCAGAAGACGGCATACGAGATCTGGATAGACACGCACGATCCGACGGTAGTGT	CTGGATAG	CTATCCAG
Edi-0	British_isles	4G	TCATCAGC	2016-06-13	6h	okay	25		888234			6		max-31_S31_R1_001.fastq.gz	27592	-0.0809469	6.53887	30070.1	30613.4	SLXA_PE_MIPBC2_REV_031	CAAGCAGAAGACGGCATACGAGATTCATCAGCACACGCACGATCCGACGGTAGTGT	TCATCAGC	GCTGATGA
Ei-2	West_europe	4H	TTATACCG	2016-06-13	6h	okay	25		830704			6		max-32_S32_R1_001.fastq.gz	27974	-0.0684687	6.44957	30070.1	30613.4	SLXA_PE_MIPBC2_REV_032	CAAGCAGAAGACGGCATACGAGATTTATACCGACACGCACGATCCGACGGTAGTGT	TTATACCG	CGGTATAA
Fab-2	Scandinavia	5A	GCTGATTC	2016-06-14	6h	high	25		897494			4		max-33_S33_R1_001.fastq.gz	25895	-0.13638	6.96738	30070.1	30613.4	SLXA_PE_MIPBC2_REV_033	CAAGCAGAAGACGGCATACGAGATGCTGATTCACACGCACGATCCGACGGTAGTGT	GCTGATTC	GAATCAGC
Fab-4	Scandinavia	5B	ATAAGGCC	2016-06-14	6h	high	25		666869			4		max-34_S34_R1_001.fastq.gz	26059	-0.131023	4.61569	30070.1	30613.4	SLXA_PE_MIPBC2_REV_034	CAAGCAGAAGACGGCATACGAGATATAAGGCCACACGCACGATCCGACGGTAGTGT	ATAAGGCC	GGCCTTAT
Got-7	West_europe	5C	AAGACTAG	2016-06-14	6h	high	25		1233928	2X too much ext/lig mix		4		max-35_S35_R1_001.fastq.gz	31528	0.0476241	3.81503	30070.1	30613.4	SLXA_PE_MIPBC2_REV_035	CAAGCAGAAGACGGCATACGAGATAAGACTAGACACGCACGATCCGACGGTAGTGT	AAGACTAG	CTAGTCTT
Got-22	West_europe	5D	TAGCAACA	2016-06-14	6h	okay	25		1258816			6		max-36_S36_R1_001.fastq.gz	34749	0.152839	3.4614	30070.1	30613.4	SLXA_PE_MIPBC2_REV_036	CAAGCAGAAGACGGCATACGAGATTAGCAACAACACGCACGATCCGACGGTAGTGT	TAGCAACA	TGTTGCTA
Gu-0	West_europe	5E	CAAGTAAT	2016-06-14	6h	okay	25		1492863			6		max-37_S37_R1_001.fastq.gz	39496	0.307902	4.56807	30070.1	30613.4	SLXA_PE_MIPBC2_REV_037	CAAGCAGAAGACGGCATACGAGATCAAGTAATACACGCACGATCCGACGGTAGTGT	CAAGTAAT	ATTACTTG
Gy-0	West_europe	5F	TCATGATG	2016-06-14	6h	okay	25		1320342			6		max-38_S38_R1_001.fastq.gz	37759	0.251162	4.77821	30070.1	30613.4	SLXA_PE_MIPBC2_REV_038	CAAGCAGAAGACGGCATACGAGATTCATGATGACACGCACGATCCGACGGTAGTGT	TCATGATG	CATCATGA
HR-5	British_isles	5G	TAGCTCTT	2016-06-14	6h	okay	25		1416518			6		max-39_S39_R1_001.fastq.gz	35650	0.182271	5.06088	30070.1	30613.4	SLXA_PE_MIPBC2_REV_039	CAAGCAGAAGACGGCATACGAGATTAGCTCTTACACGCACGATCCGACGGTAGTGT	TAGCTCTT	AAGAGCTA
Kas-2	Asia	5H	ACTACATG	2016-06-14	6h	okay	25		1332060			6		max-40_S40_R1_001.fastq.gz	34600	0.147972	5.21446	30070.1	30613.4	SLXA_PE_MIPBC2_REV_040	CAAGCAGAAGACGGCATACGAGATACTACATGACACGCACGATCCGACGGTAGTGT	ACTACATG	CATGTAGT
Knox-18	North_america	6A	TGTGCCAT	2016-06-14	6h	okay	25		1170851			6		max-41_S41_R1_001.fastq.gz	32172	0.0686606	5.60799	30070.1	30613.4	SLXA_PE_MIPBC2_REV_041	CAAGCAGAAGACGGCATACGAGATTGTGCCATACACGCACGATCCGACGGTAGTGT	TGTGCCAT	ATGGCACA
Kz-1	Asia	6B	GACTTCCA	2016-06-14	6h	okay	25		1581003			6		max-42_S42_R1_001.fastq.gz	40751	0.348897	4.42739	30070.1	30613.4	SLXA_PE_MIPBC2_REV_042	CAAGCAGAAGACGGCATACGAGATGACTTCCAACACGCACGATCCGACGGTAGTGT	GACTTCCA	TGGAAGTC
Kz-9	Asia	6C	TATTCTCG	2016-06-14	6h	okay	25		1487709			6		max-43_S43_R1_001.fastq.gz	37965	0.257891	4.75228	30070.1	30613.4	SLXA_PE_MIPBC2_REV_043	CAAGCAGAAGACGGCATACGAGATTATTCTCGACACGCACGATCCGACGGTAGTGT	TATTCTCG	CGAGAATA
Ler-1	West_europe	6D	CACTAGAT	2016-06-14	6h	okay	25		1857331			6		max-44_S44_R1_001.fastq.gz	46353	0.531889	3.89231	30070.1	30613.4	SLXA_PE_MIPBC2_REV_044	CAAGCAGAAGACGGCATACGAGATCACTAGATACACGCACGATCCGACGGTAGTGT	CACTAGAT	ATCTAGTG
LL-0	South_europe	6E	CTTCGCAT	2016-06-14	6h	okay	25		1348606			6		max-45_S45_R1_001.fastq.gz	36059	0.195631	5.00348	30070.1	30613.4	SLXA_PE_MIPBC2_REV_045	CAAGCAGAAGACGGCATACGAGATCTTCGCATACACGCACGATCCGACGGTAGTGT	CTTCGCAT	ATGCGAAG
Lov-1	Scandinavia	6F	CTAGCGAT	2016-06-14	6h	okay	25		1118628			6		max-46_S46_R1_001.fastq.gz	30200	0.00424446	5.97418	30070.1	30613.4	SLXA_PE_MIPBC2_REV_046	CAAGCAGAAGACGGCATACGAGATCTAGCGATACACGCACGATCCGACGGTAGTGT	CTAGCGAT	ATCGCTAG
Lov-5	Scandinavia	6G	TACGTTAA	2016-06-14	6h	okay	25		1414267			6		max-47_S47_R1_001.fastq.gz	34006	0.128569	5.30555	30070.1	30613.4	SLXA_PE_MIPBC2_REV_047	CAAGCAGAAGACGGCATACGAGATTACGTTAAACACGCACGATCCGACGGTAGTGT	TACGTTAA	TTAACGTA
Sha	Asia	6H	AAGTAGTC	2016-07-04	6h	high	25		1466799		redid	4	7 old	max-48_S48_R1_001.fastq.gz	16537	-0.442063	10.9101	30070.1	30613.4	SLXA_PE_MIPBC2_REV_048	CAAGCAGAAGACGGCATACGAGATAAGTAGTCACACGCACGATCCGACGGTAGTGT	AAGTAGTC	GACTACTT
Lp2-2	East_europe	7A	GACGTATC	2016-06-15	6h	okay	25		1749273			8		max-49_S49_R1_001.fastq.gz	46548	0.538258	2.584	30070.1	30613.4	SLXA_PE_MIPBC2_REV_049	CAAGCAGAAGACGGCATACGAGATGACGTATCACACGCACGATCCGACGGTAGTGT	GACGTATC	GATACGTC
Lz-0	West_europe	7B	ACGTTCAG	2016-06-15	6h	okay	25		1952040			8		max-50_S50_R1_001.fastq.gz	53827	0.77603	4.46914	30070.1	30613.4	SLXA_PE_MIPBC2_REV_050	CAAGCAGAAGACGGCATACGAGATACGTTCAGACACGCACGATCCGACGGTAGTGT	ACGTTCAG	CTGAACGT
Ms-0	East_europe	7C	AGCTATAT	2016-06-15	6h	okay	25		2577363			8		max-51_S51_R1_001.fastq.gz	58828	0.93939	4.08922	30070.1	30613.4	SLXA_PE_MIPBC2_REV_051	CAAGCAGAAGACGGCATACGAGATAGCTATATACACGCACGATCCGACGGTAGTGT	AGCTATAT	ATATAGCT
Mt-0	South_europe	7D	AGTGCGAA	2016-06-15	6h	okay	25		1697776			8		max-52_S52_R1_001.fastq.gz	53360	0.760775	4.50826	30070.1	30613.4	SLXA_PE_MIPBC2_REV_052	CAAGCAGAAGACGGCATACGAGATAGTGCGAAACACGCACGATCCGACGGTAGTGT	AGTGCGAA	TTCGCACT
Mz-0	West_europe	7E	CAATGGTA	2016-06-15	6h	okay	25		2126811			8		max-53_S53_R1_001.fastq.gz	56487	0.86292	4.25869	30070.1	30613.4	SLXA_PE_MIPBC2_REV_053	CAAGCAGAAGACGGCATACGAGATCAATGGTAACACGCACGATCCGACGGTAGTGT	CAATGGTA	TACCATTG
NFA-8	British_isles	7F	ATTCCGAT	2016-06-15	6h	okay	25		1967962			8		max-54_S54_R1_001.fastq.gz	53451	0.763748	4.50058	30070.1	30613.4	SLXA_PE_MIPBC2_REV_054	CAAGCAGAAGACGGCATACGAGATATTCCGATACACGCACGATCCGACGGTAGTGT	ATTCCGAT	ATCGGAAT
NFA-10	British_isles	7G	AGCTGTTG	2016-06-15	6h	okay	25		1472754			8		max-55_S55_R1_001.fastq.gz	38124	0.263085	6.30995	30070.1	30613.4	SLXA_PE_MIPBC2_REV_055	CAAGCAGAAGACGGCATACGAGATAGCTGTTGACACGCACGATCCGACGGTAGTGT	AGCTGTTG	CAACAGCT
Nok-3	West_europe	7H	TTCGACTC	2016-06-15	6h	okay	25		1526462			8		max-56_S56_R1_001.fastq.gz	51358	0.695379	4.68399	30070.1	30613.4	SLXA_PE_MIPBC2_REV_056	CAAGCAGAAGACGGCATACGAGATTTCGACTCACACGCACGATCCGACGGTAGTGT	TTCGACTC	GAGTCGAA
Omo2-3	Scandinavia	8A	CGAATGGT	2016-06-22	6h	okay	25		1429607			8		max-57_S57_R1_001.fastq.gz	36280	0.20285	6.63066	30070.1	30613.4	SLXA_PE_MIPBC2_REV_057	CAAGCAGAAGACGGCATACGAGATCGAATGGTACACGCACGATCCGACGGTAGTGT	CGAATGGT	ACCATTCG
Oy-0	Scandinavia	8B	TAGTGTAC	2016-06-15	6h	okay	25		2233747			6		max-58_S58_R1_001.fastq.gz	59200	0.951541	4.06352	30070.1	30613.4	SLXA_PE_MIPBC2_REV_058	CAAGCAGAAGACGGCATACGAGATTAGTGTACACACGCACGATCCGACGGTAGTGT	TAGTGTAC	GTACACTA
PNA-17	North_america	8C	ACGCATGA	2016-06-15	6h	okay	25		1976257			8		max-59_S59_R1_001.fastq.gz	52978	0.748297	3.40557	30070.1	30613.4	SLXA_PE_MIPBC2_REV_059	CAAGCAGAAGACGGCATACGAGATACGCATGAACACGCACGATCCGACGGTAGTGT	ACGCATGA	TCATGCGT
Pro-0	South_europe	8D	TTCGTACA	2016-06-15	6h	okay	25		1865457			8		max-60_S60_R1_001.fastq.gz	51347	0.69502	4.685	30070.1	30613.4	SLXA_PE_MIPBC2_REV_060	CAAGCAGAAGACGGCATACGAGATTTCGTACAACACGCACGATCCGACGGTAGTGT	TTCGTACA	TGTACGAA
Pu2-23	East_europe	8E	TTCTGCTA	2016-06-15	6h	okay	25		1806653			8		max-61_S61_R1_001.fastq.gz	47203	0.559654	5.0963	30070.1	30613.4	SLXA_PE_MIPBC2_REV_061	CAAGCAGAAGACGGCATACGAGATTTCTGCTAACACGCACGATCCGACGGTAGTGT	TTCTGCTA	TAGCAGAA
Ra-0	West_europe	8F	TGGAAGCA	2016-06-15	6h	okay	25		1570877			8		max-62_S62_R1_001.fastq.gz	46697	0.543126	5.15152	30070.1	30613.4	SLXA_PE_MIPBC2_REV_062	CAAGCAGAAGACGGCATACGAGATTGGAAGCAACACGCACGATCCGACGGTAGTGT	TGGAAGCA	TGCTTCCA
Ren-1	West_europe	8G	GATGCTCA	2016-06-15	6h	okay	25		1619225			8		max-63_S63_R1_001.fastq.gz	45837	0.515033	5.24817	30070.1	30613.4	SLXA_PE_MIPBC2_REV_063	CAAGCAGAAGACGGCATACGAGATGATGCTCAACACGCACGATCCGACGGTAGTGT	GATGCTCA	TGAGCATC
Zdr-6	East_europe	8H	AGCCTGAA	2016-06-22	6h	okay	25		1168035			8		max-64_S64_R1_001.fastq.gz	27516	-0.0834295	8.74257	30070.1	30613.4	SLXA_PE_MIPBC2_REV_064	CAAGCAGAAGACGGCATACGAGATAGCCTGAAACACGCACGATCCGACGGTAGTGT	AGCCTGAA	TTCAGGCT
An-0	West_europe	9A	CACCAGTA	2016-06-16	6h	faint	25		1679250	zymo prep-~1/2X DNA [??]		6		max-65_S65_R1_001.fastq.gz	45803	0.513923	5.25207	30070.1	30613.4	SLXA_PE_MIPBC2_REV_065	CAAGCAGAAGACGGCATACGAGATCACCAGTAACACGCACGATCCGACGGTAGTGT	CACCAGTA	TACTGGTG
Lp2-6	East_europe	9B	GTTACACC	2016-06-16	6h	okay	25		1138548	zymo prep-~2X DNA [??]		8		max-66_S66_R1_001.fastq.gz	38415	0.272591	4.69661	30070.1	30613.4	SLXA_PE_MIPBC2_REV_066	CAAGCAGAAGACGGCATACGAGATGTTACACCACACGCACGATCCGACGGTAGTGT	GTTACACC	GGTGTAAC
Eden-1	Scandinavia	9C	GCGTTAGT	2016-06-16	6h	high	25		1082444	new concentration		6		max-67_S67_R1_001.fastq.gz	28537	-0.0500781	8.42978	30070.1	30613.4	SLXA_PE_MIPBC2_REV_067	CAAGCAGAAGACGGCATACGAGATGCGTTAGTACACGCACGATCCGACGGTAGTGT	GCGTTAGT	ACTAACGC
Se-0	South_europe	9D	TGACGTTC	2016-06-22	6h	okay	25		1208548			4		max-68_S68_R1_001.fastq.gz	36017	0.194259	5.00931	30070.1	30613.4	SLXA_PE_MIPBC2_REV_068	CAAGCAGAAGACGGCATACGAGATTGACGTTCACACGCACGATCCGACGGTAGTGT	TGACGTTC	GAACGTCA
Kin-0	North_america	9E	TAGGCGTA	2016-06-16	6h	high	25		1069502	new concentration		6		max-69_S69_R1_001.fastq.gz	31180	0.0362566	3.85761	30070.1	30613.4	SLXA_PE_MIPBC2_REV_069	CAAGCAGAAGACGGCATACGAGATTAGGCGTAACACGCACGATCCGACGGTAGTGT	TAGGCGTA	TACGCCTA
Knox-10	North_america	9F	AAGTGAGC	2016-06-16	6h	high	25		916522	new concentration		4		max-70_S70_R1_001.fastq.gz	28208	-0.060825	6.39607	30070.1	30613.4	SLXA_PE_MIPBC2_REV_070	CAAGCAGAAGACGGCATACGAGATAAGTGAGCACACGCACGATCCGACGGTAGTGT	AAGTGAGC	GCTCACTT
Kondara	Asia	9G	CCGGAATA	2016-06-16	6h	high	25		1111058	new concentration		4		max-71_S71_R1_001.fastq.gz	28286	-0.0582771	4.25229	30070.1	30613.4	SLXA_PE_MIPBC2_REV_071	CAAGCAGAAGACGGCATACGAGATCCGGAATAACACGCACGATCCGACGGTAGTGT	CCGGAATA	TATTCCGG
Nd-1	West_europe	9H	AATAGGCA	2016-06-16	6h	high	25		879850	new concentration		4		max-72_S72_R1_001.fastq.gz	25193	-0.159311	4.77435	30070.1	30613.4	SLXA_PE_MIPBC2_REV_072	CAAGCAGAAGACGGCATACGAGATAATAGGCAACACGCACGATCCGACGGTAGTGT	AATAGGCA	TGCCTATT
Rmx-A02	North_america	10A	TTCAGGTC	2016-06-16	6h	okay	25		1243242			4		max-73_S73_R1_001.fastq.gz	39216	0.298756	3.06712	30070.1	30613.4	SLXA_PE_MIPBC2_REV_073	CAAGCAGAAGACGGCATACGAGATTTCAGGTCACACGCACGATCCGACGGTAGTGT	TTCAGGTC	GACCTGAA
Rmx-A180	North_america	10B	TAATCGCT	2016-06-16	6h	okay	25		1414702			6		max-74_S74_R1_001.fastq.gz	40998	0.356966	2.93381	30070.1	30613.4	SLXA_PE_MIPBC2_REV_074	CAAGCAGAAGACGGCATACGAGATTAATCGCTACACGCACGATCCGACGGTAGTGT	TAATCGCT	AGCGATTA
RRS-10	North_america	10C	CTTAGGTG	2016-06-16	6h	okay	25		1242017			6		max-75_S75_R1_001.fastq.gz	36062	0.195729	5.00306	30070.1	30613.4	SLXA_PE_MIPBC2_REV_075	CAAGCAGAAGACGGCATACGAGATCTTAGGTGACACGCACGATCCGACGGTAGTGT	CTTAGGTG	CACCTAAG
Sorbo	Asia	10D	TTGATCTC	2016-06-16	6h	okay	25		1392370			6		max-76_S76_R1_001.fastq.gz	41102	0.360363	4.38958	30070.1	30613.4	SLXA_PE_MIPBC2_REV_076	CAAGCAGAAGACGGCATACGAGATTTGATCTCACACGCACGATCCGACGGTAGTGT	TTGATCTC	GAGATCAA
Spr1-2	Scandinavia	10E	TCTTACTG	2016-06-16	6h	okay	25		1480057			6		max-77_S77_R1_001.fastq.gz	40545	0.342168	4.44988	30070.1	30613.4	SLXA_PE_MIPBC2_REV_077	CAAGCAGAAGACGGCATACGAGATTCTTACTGACACGCACGATCCGACGGTAGTGT	TCTTACTG	CAGTAAGA
Spr1-6	Scandinavia	10F	GAGTACAC	2016-06-16	6h	okay	25		1202091			6		max-78_S78_R1_001.fastq.gz	34665	0.150095	5.20468	30070.1	30613.4	SLXA_PE_MIPBC2_REV_078	CAAGCAGAAGACGGCATACGAGATGAGTACACACACGCACGATCCGACGGTAGTGT	GAGTACAC	GTGTACTC
Sq-8	British_isles	10G	ACGTTACA	2016-06-16	6h	okay	25		1585701			6		max-79_S79_R1_001.fastq.gz	42405	0.402926	4.2547	30070.1	30613.4	SLXA_PE_MIPBC2_REV_079	CAAGCAGAAGACGGCATACGAGATACGTTACAACACGCACGATCCGACGGTAGTGT	ACGTTACA	TGTAACGT
TAMM-2	Scandinavia	10H	TGGTAAGC	2016-06-16	6h	okay	25		2152462			6		max-80_S80_R1_001.fastq.gz	37730	0.250215	4.78188	30070.1	30613.4	SLXA_PE_MIPBC2_REV_080	CAAGCAGAAGACGGCATACGAGATTGGTAAGCACACGCACGATCCGACGGTAGTGT	TGGTAAGC	GCTTACCA
TAMM-27	Scandinavia	11A	GATAGCAC	2016-06-20	6h	okay	25		977572			6	4 old	max-81_S81_R1_001.fastq.gz	22359	-0.251885	8.06925	30070.1	30613.4	SLXA_PE_MIPBC2_REV_081	CAAGCAGAAGACGGCATACGAGATGATAGCACACACGCACGATCCGACGGTAGTGT	GATAGCAC	GTGCTATC
Ts-1	South_europe	11B	GACTTAGG	2016-06-20	6h	okay	25		912125			6	4 old	max-82_S82_R1_001.fastq.gz	23253	-0.222682	7.75901	30070.1	30613.4	SLXA_PE_MIPBC2_REV_082	CAAGCAGAAGACGGCATACGAGATGACTTAGGACACGCACGATCCGACGGTAGTGT	GACTTAGG	CCTAAGTC
Tsu-1	Asia	11C	AGTCGTTA	2016-06-20	6h	okay	25		1455572			6		max-83_S83_R1_001.fastq.gz	28189	-0.0614457	6.40038	30070.1	30613.4	SLXA_PE_MIPBC2_REV_083	CAAGCAGAAGACGGCATACGAGATAGTCGTTAACACGCACGATCCGACGGTAGTGT	AGTCGTTA	TAACGACT
Ull2-5	Scandinavia	11D	CGTGATTA	2016-06-20	6h	okay	25		826197			6	2 old	max-84_S84_R1_001.fastq.gz	23168	-0.225459	7.78748	30070.1	30613.4	SLXA_PE_MIPBC2_REV_084	CAAGCAGAAGACGGCATACGAGATCGTGATTAACACGCACGATCCGACGGTAGTGT	CGTGATTA	TAATCACG
Uod-1	West_europe	11E	TCAGTAGA	2016-06-20	6h	okay	25		1173265			6		max-85_S85_R1_001.fastq.gz	32195	0.0694119	5.60399	30070.1	30613.4	SLXA_PE_MIPBC2_REV_085	CAAGCAGAAGACGGCATACGAGATTCAGTAGAACACGCACGATCCGACGGTAGTGT	TCAGTAGA	TCTACTGA
Uod-7	West_europe	11F	ATGTGTCT	2016-06-20	6h	okay	25		1600032			6		max-86_S86_R1_001.fastq.gz	34216	0.135429	5.27298	30070.1	30613.4	SLXA_PE_MIPBC2_REV_086	CAAGCAGAAGACGGCATACGAGATATGTGTCTACACGCACGATCCGACGGTAGTGT	ATGTGTCT	AGACACAT
Var2-6	Scandinavia	11G	CAGAATAT	2016-06-20	6h	okay	25		963037			6	2 old	max-87_S87_R1_001.fastq.gz	23699	-0.208113	7.613	30070.1	30613.4	SLXA_PE_MIPBC2_REV_087	CAAGCAGAAGACGGCATACGAGATCAGAATATACACGCACGATCCGACGGTAGTGT	CAGAATAT	ATATTCTG
Wa-1	East_europe	11H	TAAGTCTG	2016-06-20	6h	okay	25		1864690			6		max-88_S88_R1_001.fastq.gz	32848	0.0907425	5.49258	30070.1	30613.4	SLXA_PE_MIPBC2_REV_088	CAAGCAGAAGACGGCATACGAGATTAAGTCTGACACGCACGATCCGACGGTAGTGT	TAAGTCTG	CAGACTTA
Wei-0	West_europe	12A	ATCGACAT	2016-06-20	6h	okay	25		647551			6	4 old	max-89_S89_R1_001.fastq.gz	17350	-0.415506	10.3989	30070.1	30613.4	SLXA_PE_MIPBC2_REV_089	CAAGCAGAAGACGGCATACGAGATATCGACATACACGCACGATCCGACGGTAGTGT	ATCGACAT	ATGTCGAT
Ws-0	East_europe	12B	ACAGCTGT	2016-06-20	6h	okay	25		2136761			6		max-90_S90_R1_001.fastq.gz	34090	0.131313	5.29247	30070.1	30613.4	SLXA_PE_MIPBC2_REV_090	CAAGCAGAAGACGGCATACGAGATACAGCTGTACACGCACGATCCGACGGTAGTGT	ACAGCTGT	ACAGCTGT
Ws-2	East_europe	12C	ATCACAAG	2016-06-20	6h	okay	25		690268			6	5 old	max-91_S91_R1_001.fastq.gz	16314	-0.449347	11.0592	30070.1	30613.4	SLXA_PE_MIPBC2_REV_091	CAAGCAGAAGACGGCATACGAGATATCACAAGACACGCACGATCCGACGGTAGTGT	ATCACAAG	CTTGTGAT
Wt-5	West_europe	12D	GTCGAATT	2016-06-20	6h	okay	25		1040948			6		max-92_S92_R1_001.fastq.gz	27513	-0.0835275	6.55764	30070.1	30613.4	SLXA_PE_MIPBC2_REV_092	CAAGCAGAAGACGGCATACGAGATGTCGAATTACACGCACGATCCGACGGTAGTGT	GTCGAATT	AATTCGAC
Yo-0	North_america	12E	TGCCGATT	2016-06-20	6h	okay	25		2047591			6		max-93_S93_R1_001.fastq.gz	38240	0.266874	4.71811	30070.1	30613.4	SLXA_PE_MIPBC2_REV_093	CAAGCAGAAGACGGCATACGAGATTGCCGATTACACGCACGATCCGACGGTAGTGT	TGCCGATT	AATCGGCA
Zdr-1	East_europe	12F	ACTAATGC	2016-06-20	6h	okay	25		812041			6	2 old	max-94_S94_R1_001.fastq.gz	23931	-0.200535	7.53919	30070.1	30613.4	SLXA_PE_MIPBC2_REV_094	CAAGCAGAAGACGGCATACGAGATACTAATGCACACGCACGATCCGACGGTAGTGT	ACTAATGC	GCATTAGT
Bay-0	West_europe	12G	CTAGTAGG	2016-06-20	6h	okay	25		1088655			6		max-95_S95_R1_001.fastq.gz	33025	0.0965242	5.46315	30070.1	30613.4	SLXA_PE_MIPBC2_REV_095	CAAGCAGAAGACGGCATACGAGATCTAGTAGGACACGCACGATCCGACGGTAGTGT	CTAGTAGG	CCTACTAG
Cvi-0	South_europe	12H	TTAAGCCA	2016-06-20	6h	okay	25		940736			6		max-96_S96_R1_001.fastq.gz	30112	0.00136991	5.99164	30070.1	30613.4	SLXA_PE_MIPBC2_REV_096	CAAGCAGAAGACGGCATACGAGATTTAAGCCAACACGCACGATCCGACGGTAGTGT	TTAAGCCA	TGGCTTAA
Var2-1		1H		2016-05-31	6h	okay	25					6		average	31813.2
Van-0		2H		2016-06-22	6h	ladder	25				y	6		sd	13212.7
XXXX		6H		NOT DONE YET			25			BC used in no DNA control	y
XXXX		8H		NOT DONE YET						BC used in no DNA control	y
Fei-0		9D		2016-06-16	6h	high	25			[ALREADY DONE] new concentration	n
												NA
									137132721		total vol:
												548	109
												0.635036	69.219

## Sheet: lib_summary
Strain	barcode ID (SLXA_PE_MIPBC)	hyb date	hyb length	demultiplexed reads	Forward read file	Barcode
Col	1A	2016-05-31	6h	1996654	max-1_S1_R1_001.fastq.gz	GTTAAGAC
Bur-0	1B	2016-05-31	6h	2075081	max-2_S2_R1_001.fastq.gz	TCTAAGTT
CIBC-17	1C	2016-05-31	6h	2241577	max-3_S3_R1_001.fastq.gz	TGTACATT
Ga-0	1D	2016-05-31	6h	1836433	max-4_S4_R1_001.fastq.gz	AATACCGC
HR-10	1E	2016-05-31	6h	2199476	max-5_S5_R1_001.fastq.gz	TGTCTATG
Mrk-0	1F	2016-05-31	6h	1676893	max-6_S6_R1_001.fastq.gz	TCACTGTT
PNA-10	1G	2016-05-31	6h	1985629	max-7_S7_R1_001.fastq.gz	TTGTATTC
Var2-1	1H	2016-06-22	6h	1154427	max-8_S8_R1_001.fastq.gz	AGACTAAC
Fei-0	2A	2016-06-02	6h	1950862	max-9_S9_R1_001.fastq.gz	ATTGTCAA
Mr-0	2B	2016-06-02	6h	2147955	max-10_S10_R1_001.fastq.gz	GTTCTACA
Omo2-1	2C	2016-06-02	6h	2073289	max-11_S11_R1_001.fastq.gz	TTCATTCG
Pu2-7	2D	2016-06-02	6h	1993609	max-12_S12_R1_001.fastq.gz	AAGCGTCA
Ren-11	2E	2016-06-02	6h	1893193	max-13_S13_R1_001.fastq.gz	CGTAGGAT
Rrs-7	2F	2016-06-02	6h	1681638	max-14_S14_R1_001.fastq.gz	AGTTAGCG
Ts-5	2G	2016-06-02	6h	2422435	max-15_S15_R1_001.fastq.gz	GAACGTCT
Van-0	2H	2016-07-04	6h	939100	max-16_S16_R1_001.fastq.gz	AGAACACT
Ag-0	3A	2016-06-13	3h	962418	max-17_S17_R1_001.fastq.gz	TGTTGGCA
Br-0	3B	2016-06-13	3h	1347638	max-18_S18_R1_001.fastq.gz	GGCTAATA
Bil-5	3C	2016-06-13	3h	1213599	max-19_S19_R1_001.fastq.gz	GCTAGAAT
Bil-7	3D	2016-06-13	3h	1343580	max-20_S20_R1_001.fastq.gz	TGTACTAA
Bor-1	3E	2016-06-13	3h	1036562	max-21_S21_R1_001.fastq.gz	AGTTACAC
Bor-4	3F	2016-06-13	3h	919269	max-22_S22_R1_001.fastq.gz	GTACACGA
Sq-1	3G	2016-06-13	3h	956004	max-23_S23_R1_001.fastq.gz	ACTGTAAG
Ull2-3	3H	2016-06-13	3h	1290015	max-24_S24_R1_001.fastq.gz	GATCATGA
C24	4A	2016-06-13	6h	1071102	max-25_S25_R1_001.fastq.gz	TGCTAACG
CIBC-5	4B	2016-06-13	6h	1025847	max-26_S26_R1_001.fastq.gz	TAATGCTC
N13	4C	2016-06-13	6h	1226458	max-27_S27_R1_001.fastq.gz	CTTGTTGA
Ct-1	4D	2016-06-13	6h	1215822	max-28_S28_R1_001.fastq.gz	GATACAAG
Est-1	4E	2016-06-13	6h	860248	max-29_S29_R1_001.fastq.gz	ATACAGCG
Eden-2	4F	2016-06-13	6h	897182	max-30_S30_R1_001.fastq.gz	CTGGATAG
Edi-0	4G	2016-06-13	6h	888234	max-31_S31_R1_001.fastq.gz	TCATCAGC
Ei-2	4H	2016-06-13	6h	830704	max-32_S32_R1_001.fastq.gz	TTATACCG
Fab-2	5A	2016-06-14	6h	897494	max-33_S33_R1_001.fastq.gz	GCTGATTC
Fab-4	5B	2016-06-14	6h	666869	max-34_S34_R1_001.fastq.gz	ATAAGGCC
Got-7	5C	2016-06-14	6h	1233928	max-35_S35_R1_001.fastq.gz	AAGACTAG
Got-22	5D	2016-06-14	6h	1258816	max-36_S36_R1_001.fastq.gz	TAGCAACA
Gu-0	5E	2016-06-14	6h	1492863	max-37_S37_R1_001.fastq.gz	CAAGTAAT
Gy-0	5F	2016-06-14	6h	1320342	max-38_S38_R1_001.fastq.gz	TCATGATG
HR-5	5G	2016-06-14	6h	1416518	max-39_S39_R1_001.fastq.gz	TAGCTCTT
Kas-2	5H	2016-06-14	6h	1332060	max-40_S40_R1_001.fastq.gz	ACTACATG
Knox-18	6A	2016-06-14	6h	1170851	max-41_S41_R1_001.fastq.gz	TGTGCCAT
Kz-1	6B	2016-06-14	6h	1581003	max-42_S42_R1_001.fastq.gz	GACTTCCA
Kz-9	6C	2016-06-14	6h	1487709	max-43_S43_R1_001.fastq.gz	TATTCTCG
Ler-1	6D	2016-06-14	6h	1857331	max-44_S44_R1_001.fastq.gz	CACTAGAT
LL-0	6E	2016-06-14	6h	1348606	max-45_S45_R1_001.fastq.gz	CTTCGCAT
Lov-1	6F	2016-06-14	6h	1118628	max-46_S46_R1_001.fastq.gz	CTAGCGAT
Lov-5	6G	2016-06-14	6h	1414267	max-47_S47_R1_001.fastq.gz	TACGTTAA
Sha	6H	2016-07-04	6h	1466799	max-48_S48_R1_001.fastq.gz	AAGTAGTC
Lp2-2	7A	2016-06-15	6h	1749273	max-49_S49_R1_001.fastq.gz	GACGTATC
Lz-0	7B	2016-06-15	6h	1952040	max-50_S50_R1_001.fastq.gz	ACGTTCAG
Ms-0	7C	2016-06-15	6h	2577363	max-51_S51_R1_001.fastq.gz	AGCTATAT
Mt-0	7D	2016-06-15	6h	1697776	max-52_S52_R1_001.fastq.gz	AGTGCGAA
Mz-0	7E	2016-06-15	6h	2126811	max-53_S53_R1_001.fastq.gz	CAATGGTA
NFA-8	7F	2016-06-15	6h	1967962	max-54_S54_R1_001.fastq.gz	ATTCCGAT
NFA-10	7G	2016-06-15	6h	1472754	max-55_S55_R1_001.fastq.gz	AGCTGTTG
Nok-3	7H	2016-06-15	6h	1526462	max-56_S56_R1_001.fastq.gz	TTCGACTC
Omo2-3	8A	2016-06-22	6h	1429607	max-57_S57_R1_001.fastq.gz	CGAATGGT
Oy-0	8B	2016-06-15	6h	2233747	max-58_S58_R1_001.fastq.gz	TAGTGTAC
PNA-17	8C	2016-06-15	6h	1976257	max-59_S59_R1_001.fastq.gz	ACGCATGA
Pro-0	8D	2016-06-15	6h	1865457	max-60_S60_R1_001.fastq.gz	TTCGTACA
Pu2-23	8E	2016-06-15	6h	1806653	max-61_S61_R1_001.fastq.gz	TTCTGCTA
Ra-0	8F	2016-06-15	6h	1570877	max-62_S62_R1_001.fastq.gz	TGGAAGCA
Ren-1	8G	2016-06-15	6h	1619225	max-63_S63_R1_001.fastq.gz	GATGCTCA
Zdr-6	8H	2016-06-22	6h	1168035	max-64_S64_R1_001.fastq.gz	AGCCTGAA
An-0	9A	2016-06-16	6h	1679250	max-65_S65_R1_001.fastq.gz	CACCAGTA
Lp2-6	9B	2016-06-16	6h	1138548	max-66_S66_R1_001.fastq.gz	GTTACACC
Eden-1	9C	2016-06-16	6h	1082444	max-67_S67_R1_001.fastq.gz	GCGTTAGT
Se-0	9D	2016-06-22	6h	1208548	max-68_S68_R1_001.fastq.gz	TGACGTTC
Kin-0	9E	2016-06-16	6h	1069502	max-69_S69_R1_001.fastq.gz	TAGGCGTA
Knox-10	9F	2016-06-16	6h	916522	max-70_S70_R1_001.fastq.gz	AAGTGAGC
Kondara	9G	2016-06-16	6h	1111058	max-71_S71_R1_001.fastq.gz	CCGGAATA
Nd-1	9H	2016-06-16	6h	879850	max-72_S72_R1_001.fastq.gz	AATAGGCA
Rmx-A02	10A	2016-06-16	6h	1243242	max-73_S73_R1_001.fastq.gz	TTCAGGTC
Rmx-A180	10B	2016-06-16	6h	1414702	max-74_S74_R1_001.fastq.gz	TAATCGCT
RRS-10	10C	2016-06-16	6h	1242017	max-75_S75_R1_001.fastq.gz	CTTAGGTG
Sorbo	10D	2016-06-16	6h	1392370	max-76_S76_R1_001.fastq.gz	TTGATCTC
Spr1-2	10E	2016-06-16	6h	1480057	max-77_S77_R1_001.fastq.gz	TCTTACTG
Spr1-6	10F	2016-06-16	6h	1202091	max-78_S78_R1_001.fastq.gz	GAGTACAC
Sq-8	10G	2016-06-16	6h	1585701	max-79_S79_R1_001.fastq.gz	ACGTTACA
TAMM-2	10H	2016-06-16	6h	2152462	max-80_S80_R1_001.fastq.gz	TGGTAAGC
TAMM-27	11A	2016-06-20	6h	977572	max-81_S81_R1_001.fastq.gz	GATAGCAC
Ts-1	11B	2016-06-20	6h	912125	max-82_S82_R1_001.fastq.gz	GACTTAGG
Tsu-1	11C	2016-06-20	6h	1455572	max-83_S83_R1_001.fastq.gz	AGTCGTTA
Ull2-5	11D	2016-06-20	6h	826197	max-84_S84_R1_001.fastq.gz	CGTGATTA
Uod-1	11E	2016-06-20	6h	1173265	max-85_S85_R1_001.fastq.gz	TCAGTAGA
Uod-7	11F	2016-06-20	6h	1600032	max-86_S86_R1_001.fastq.gz	ATGTGTCT
Var2-6	11G	2016-06-20	6h	963037	max-87_S87_R1_001.fastq.gz	CAGAATAT
Wa-1	11H	2016-06-20	6h	1864690	max-88_S88_R1_001.fastq.gz	TAAGTCTG
Wei-0	12A	2016-06-20	6h	647551	max-89_S89_R1_001.fastq.gz	ATCGACAT
Ws-0	12B	2016-06-20	6h	2136761	max-90_S90_R1_001.fastq.gz	ACAGCTGT
Ws-2	12C	2016-06-20	6h	690268	max-91_S91_R1_001.fastq.gz	ATCACAAG
Wt-5	12D	2016-06-20	6h	1040948	max-92_S92_R1_001.fastq.gz	GTCGAATT
Yo-0	12E	2016-06-20	6h	2047591	max-93_S93_R1_001.fastq.gz	TGCCGATT
Zdr-1	12F	2016-06-20	6h	812041	max-94_S94_R1_001.fastq.gz	ACTAATGC
Bay-0	12G	2016-06-20	6h	1088655	max-95_S95_R1_001.fastq.gz	CTAGTAGG
Cvi-0	12H	2016-06-20	6h	940736	max-96_S96_R1_001.fastq.gz	TTAAGCCA

## Sheet: seq_runs
Sequencing run	instrument, kit	demultiplexed reads	libraries	notes
Pilot	MiSeq v2, 300 cycle	15008516	5
Full experiment	NextSeq 500 v2, 300 cycle High Output	137132721	96	flow cell malfunction, lost ~60% of reads with demultiplexing

## Sheet: Pilot
library	fastq_lines	reads
Col0-NewMIP_S2_L001	9751160	2437790
Cvi-NewMIP_S4_L001	9810464	2452616
Bay0-NewMIP_S3_L001	11295472	2823868
Tsu1-NewMIP_S1_L001	15025488	3756372
Vod7-NewMIP_S6_L001	14151480	3537870
		15008516	total

## Sheet: coverage
library	fastq_lines	n_read_pairs
max-10_S10	8591820	2147955
max-11_S11	8293156	2073289
max-12_S12	7974436	1993609
max-13_S13	7572772	1893193
max-14_S14	6726552	1681638
max-15_S15	9689740	2422435
max-16_S16	3756400	939100
max-17_S17	3849672	962418
max-18_S18	5390552	1347638
max-19_S19	4854396	1213599
max-1_S1	7986616	1996654
max-20_S20	5374320	1343580
max-21_S21	4146248	1036562
max-22_S22	3677076	919269
max-23_S23	3824016	956004
max-24_S24	5160060	1290015
max-25_S25	4284408	1071102
max-26_S26	4103388	1025847
max-27_S27	4905832	1226458
max-28_S28	4863288	1215822
max-29_S29	3440992	860248
max-2_S2	8300324	2075081
max-30_S30	3588728	897182
max-31_S31	3552936	888234
max-32_S32	3322816	830704
max-33_S33	3589976	897494
max-34_S34	2667476	666869
max-35_S35	4935712	1233928
max-36_S36	5035264	1258816
max-37_S37	5971452	1492863
max-38_S38	5281368	1320342
max-39_S39	5666072	1416518
max-3_S3	8966308	2241577
max-40_S40	5328240	1332060
max-41_S41	4683404	1170851
max-42_S42	6324012	1581003
max-43_S43	5950836	1487709
max-44_S44	7429324	1857331
max-45_S45	5394424	1348606
max-46_S46	4474512	1118628
max-47_S47	5657068	1414267
max-48_S48	5867196	1466799
max-49_S49	6997092	1749273
max-4_S4	7345732	1836433
max-50_S50	7808160	1952040
max-51_S51	10309452	2577363
max-52_S52	6791104	1697776
max-53_S53	8507244	2126811
max-54_S54	7871848	1967962
max-55_S55	5891016	1472754
max-56_S56	6105848	1526462
max-57_S57	5718428	1429607
max-58_S58	8934988	2233747
max-59_S59	7905028	1976257
max-5_S5	8797904	2199476
max-60_S60	7461828	1865457
max-61_S61	7226612	1806653
max-62_S62	6283508	1570877
max-63_S63	6476900	1619225
max-64_S64	4672140	1168035
max-65_S65	6717000	1679250
max-66_S66	4554192	1138548
max-67_S67	4329776	1082444
max-68_S68	4834192	1208548
max-69_S69	4278008	1069502
max-6_S6	6707572	1676893
max-70_S70	3666088	916522
max-71_S71	4444232	1111058
max-72_S72	3519400	879850
max-73_S73	4972968	1243242
max-74_S74	5658808	1414702
max-75_S75	4968068	1242017
max-76_S76	5569480	1392370
max-77_S77	5920228	1480057
max-78_S78	4808364	1202091
max-79_S79	6342804	1585701
max-7_S7	7942516	1985629
max-80_S80	8609848	2152462
max-81_S81	3910288	977572
max-82_S82	3648500	912125
max-83_S83	5822288	1455572
max-84_S84	3304788	826197
max-85_S85	4693060	1173265
max-86_S86	6400128	1600032
max-87_S87	3852148	963037
max-88_S88	7458760	1864690
max-89_S89	2590204	647551
max-8_S8	4617708	1154427
max-90_S90	8547044	2136761
max-91_S91	2761072	690268
max-92_S92	4163792	1040948
max-93_S93	8190364	2047591
max-94_S94	3248164	812041
max-95_S95	4354620	1088655
max-96_S96	3762944	940736
max-9_S9	7803448	1950862

## Sheet: completeness_tracking
Strain	prepped?	nordborg_name
Ag-0	y	Ag-0
An-1	y	An-1
Bay-0	y	Bay-0
Bil-5	y	Bil-5
Bil-7	y	Bil-7
Bor-1	y	Bor-1
Bor-4	y	Bor-4
Br-0	y	Br-0
Bur-0	y	Bur-0
C24	y	C24
CIBC-5	y	CIBC-17
CIBC-17	y	CIBC-5
Col-0	y	Col-0
Ct-1	y	Ct-1
Cvi-0	y	Cvi-0
Eden-1	y	Eden-1
Eden-2	y	Eden-2
Edi-0	y	Edi-0
Ei-2	y	Ei-2
Est-1	y	Est-1
Fab-2	y	Fab-2
Fab-4	y	Fab-4
Fei-0	y	Fei-0
Ga-0	y	Ga-0
Got-7	y	GOT-22
Got-22	y	GOT-7
Gu-0	y	Gu-0
Gy-0	y	Gy-0
HR-5	y	HR-10
HR-10	y	HR-5
Kas-2	y	Kas-2
Kin-0	y	Kin-0
Knox-10	y	Kno-10
Knox-18	y	Kno-18
Kondara	y	Kondara
Kz-1	y	Kz-1
Kz-9	y	Kz-9
Ler-1	y	Ler-1
LL-0	y	LL-0
Lov-1	y	Lov-1
Lov-5	y	Lov-5
Lp2-2	y	LP2-2
Lp2-6	y	LP2-6
Lz-0	y	Lz-0
Mr-0	y	Mr-0
Mrk-0	y	Mrk-0
Ms-0	y	NA
Mt-0	y	Mt-0
Mz-0	y	Mz-0
N13	y	N13
Nd-1	y	Nd-1
NFA-8	y	NFA-10
NFA-10	y	NFA-8
Nok-3	y	Nok-3
Omo2-1	y	Omo-2-1
Omo2-3	y	Omo-2-3
Oy-0	y	Oy-0
Pna-10	y	PNA-10
Pna-17	y	PNA-17
Pro-0	y	Pro-0
Pu2-7	y	Pu2-7
Pu2-23	y	Pu2-23
Ra-0	y	Ra-0
Ren-1	y	REN-1
Ren-11	y	Ren-11
Rmx-A02	y	RMX-A02
Rmx-A180	y	RMX-A180
RRS-7	y	RRS-7
RRS-10	y	RRS-10
Se-0	y	Se-0
Shakdara	y	Shahdara
Sorbo	y	Sorbo
Spr1-2	y	Spr1-2
Spr1-6	y	Spr1-6
Sq-1	y	Sq-1
Sq-8	y	Sq-8
Tamm-2	y	TAMM-2
Tamm-27	y	TAMM-27
Ts-1	y	Ts-1
Ts-5	y	Ts-5
Tsu-1	y	Tsu-1
Ull2-3	y	Ull2-3
Ull2-5	y	Ull2-5
Uod-1	y	Uod-1
Uod-7	y	Uod-7
Van-0	y	Van-0
Var2-1	y	Var-2-1
Var2-6	y	Var-2-6
Wa-1	y	Wa-1
Wei-0	y	Wei-0
Ws-0	y	Ws-0
Ws-2	y	Ws-2
Wt-5	y	Wt-5
Yo-0	y	Yo-0
Zdr-1	y	Zdr-1
Zdr-6	y	Zdr-6

## Sheet: nordborg_extras
nordborg_extras
Aa-0
Alc-0
Algutsrum
Ang-0
Ba-1
Ba-1-2
Ba-4-1
Ba-5-1
Bg-2
Bla-1
Blh-1
Boo-2-1
Bro-1-6
Bs-1
Bu-0
Buckhorn Pass
Ca-0
Can-0
Cen-0
Cnt-1
Co
Da-0
Da(1)-12
Dem-4
Dra3-1
DraII-1
DraIII-1
Duk
Eds-1
En-1
Ep-0
Fj?1-1
Gd-1
Ge-0
Gie-0
Gr-1
H55
Ha-0
Hod
Hov-4-1
Hov2-1
Hs-0
Hsm
In-0
Is-0
Jl-3
Jm-0
Ka-0
Kavlinge-1
Kelsterbach-4
Kni-1
Koln
Kulturen-1
Lc-0
Li-7
Liarum
Lillo-1
Lip-0
Lis-1
Lis-2
Lisse
Lm-2
Lom-1-1
Lu-1
Lund
Mh-0
Mir-0
Na-1
No-0
Nyl-2
Or-0
Or-1
Ost-0
Pa-1
Per-1
Petergof
PHW-2
Pla-0
Pog-0
Pu2-8
Rak-2
Rd-0
Rev-1
Rsch-4
Rubezhnoe-1
San-2
Sanna-2
Sap-0
Sav-0
Seattle-0
St-0
Ste-0
Stw-0
Ta-0
Tottarp-2
Tu-0
Ull-1-1
V0stervik
Vimmerby
Vinslov
WAR
Wil-1-Dean-Lab
Zu-1
