# Supplementary material for: Massive variation of short tandem repeats with functional consequences across strains of Arabidopsis thaliana
Source: HighWire-hosted journal article supplement (doi:10.1101/gr.231753.117), 2018-07-03
Supplement: Supplemental_File_S4.zip [file purifying_selxn_092916.xlsx]

## Sheet: coding_diversifying_122016
Z_score	ID	Chromosome	TAIR10start	TAIR10end	Unit.Size	X..of.Units	Purity	VARscore	Consensus	GC_content	ta_gc	la_gc	scan_gc	gene_model	gene	name	description	notes	seq	unit
14.189	2539	1	4261712	4261731	3	6.7	100	0.303382	AGA	0.333333	0.333333	0.555556	0.362963	AT1G12490.1	AT1G12490	N/A	F-box associated ubiquitination effector family protein [Source:TAIR;Acc:AT1G12490]	multiple strs	MESLPHEVVERILEKTCCGFSAEIHGCIETMEIIDRISILPTKTIDTASAIRSREDYFNPDLKHLTTLVLGSSSSVTIPTPWEKDKEKEKEKEKEDEEFFLVSFDSCDGLVCLYKYWKSGYVVNPTTRWYRPLPLSQLQQLLISLGRSVFELGYTVCDIGFGKDKITGTYKPVWLYNSLEIGLENATTCEVFDFNTNAWRYVSPTAPYREETKILSFDLHTETFRVVSKAPFTNVKAFDIVMCNLGNRLCVSEKNWPNQVIWSFNSGNKTWHKMFSINLDVTSHWFGNHIAAVMPLALFYEKKKKKKLLFYCRVRSRTLMVYDPETESYDVAFNDYSIGYPLCYFQSLISIS	K
6.59309	7564	1	11322718	11322738	3	7	100	0.37134	TGG	0.666667	0.263158	0.590909	0.402878	AT1G31640.1	AT1G31640	AGL92	Agamous-like MADS-box protein AGL92 [Source:UniProtKB/Swiss-Prot;Acc:Q9C6V4]	T/N, Cterm	MRTKTKLVLIPDRHFRRATFRKRNAGIRKKLHELTTLCDIKACAVIYSPFENPTVWPSTEGVQEVISEFMEKPATERSKTMMSHETFLRDQITKEQNKLESLRRENRETQLKHFMFDCVGGKMSEQQYGARDLQDLSLFTDQYLNQLNARKKFLTEYGESSSSVPPLFDVAGANPPVVADQAAVTVPPLFAVAGANLPVVADQAAVTVPPLFAVAGANLPVVADQAAVNVPTGFHNMNVNQNQYEPVQPYVPTGFSDHIQYQNMNFNQNQQEPVHYQALAVAGAGLPMTQNQYEPVHYQSLAVAGGGLPMSQLQYEPVQPYIPTVFSDNVQYQHMNLYQNQQEPVHYQALGVAGAGLPMNQNQYEPVQPYVPTGFSDHFQFENMNLNQNQQEPVQYQAP…	T
9.83342	15746	1	17436847	17436868	3	7.3	100	0.435838	AGA	0.333333	0.25	0.448276	0.244444		AT1G47510	5PTASE11	ARABIDOPSIS THALIANA INOSITOL POLYPHOSPHATE 5-PHOSPHATASE 11	protein,weirdly annotated so no aa,Nterm		R
6.96751	25822	1	30416073	30416098	3	8.7	91	0.530293	ATC	0.333333	0.5	0.413793	0.355556	AT1G80960.2	AT1G80960	N/A	F-box protein At1g80960 [Source:UniProtKB/Swiss-Prot;Acc:Q9SAG4]	Nterm	MERSSSSSSSSCDKVWNLGLPYPTFTLANDDKPYLITVSDDHSVKVKNVDWISKLPDDVLLIILSRLSTEEAIRTSVVSKRWEHVWNQMSHLVFDMRKNIINSNNTLDGSNPVATLITQVINNHRGHLESCVIIHVPYQGGNGMLNSWIRLLSCVKRTKVLTLRYHYGTWDRKFKTFNFSPDSLSHPSLMSLSLHSYFLESSHPLRNCSNLRTLKLLSIVAPEIGVFNRVLASCPCLEVLVLGICCFKKSRVPLKIENKKLKLLQVSSLERIDAIEVSTTSLDILAIIDICCRRDDLSLQSPQLQFNRNFWVLGPYVPHISYNISEEKSIGNEEFVNTIYGELLRPFANLYVALSVSVDLMNPTEVERLRQVLGLWTRKILELEIIFKDNNGPREENKS…	S
7.76292	35201	2	7039826	7039849	3	8	100	0.573207	ACC	0.666667	0.684211	0.538462	0.518519	AT2G16250.1	AT2G16250	N/A	Probable LRR receptor-like serine/threonine-protein kinase At2g16250 [Source:UniProtKB/Swiss-Prot;Acc:C0LGK4]	Cterm	MVDQRRSALGFVLLLLCLVLFFDCVVVGQTQSRFSEKLILLNLRSSLGLRGTDWPIKGDPCVDWRGIQCENGSIIGINISGFRRTRIGKLNPQFSVDPLRNLTRLSYFNASGLALPGTIPEWFGVSLLALEVLDLSSCSVNGVVPFTLGNLTSLRTLNLSQNSLTSLVPSSLGQLLNLSQLDLSRNSFTGVLPQSFSSLKNLLTLDVSSNYLTGPIPPGLGALSKLIHLNFSSNSFSSPIPSELGDLVNLVDFDLSINSLSGSVPQELRKLSKLQLMAIGDNLLSGTLPVDLFSAESQLQTLVLRENGFSGSLPDVCWSLPKLRILDIAKNNFTGLLPYSSYDSDQIAEMVDISSNTFYGELTPILRRFRIMDLSGNYFEGKLPDYVTGENVSVTSNCL…	G
4.22262	39221	2	11548019	11548046	3	9.3	100	0.78188	AGC	0.666667	0.529412	0.464286	0.392593	AT2G27050.1	AT2G27050	EIL1	ETHYLENE INSENSITIVE 3-like 1 protein [Source:UniProtKB/Swiss-Prot;Acc:Q9SLH0]	Cterm	MMMFNEMGMYGNMDFFSSSTSLDVCPLPQAEQEPVVEDVDYTDDEMDVDELEKRMWRDKMRLKRLKEQQSKCKEGVDGSKQRQSQEQARRKKMSRAQDGILKYMLKMMEVCKAQGFVYGIIPEKGKPVTGASDNLREWWKDKVRFDRNGPAAIAKYQSENNISGGSNDCNSLVGPTPHTLQELQDTTLGSLLSALMQHCDPPQRRFPLEKGVSPPWWPNGNEEWWPQLGLPNEQGPPPYKKPHDLKKAWKVGVLTAVIKHMSPDIAKIRKLVRQSKCLQDKMTAKESATWLAIINQEEVVARELYPESCPPLSSSSSLGSGSLLINDCSEYDVEGFEKEQHGFDVEERKPEIVMMHPLASFGVAKMQHFPIKEEVATTVNLEFTRKRKQNNDMNVMVMD…	Q
4.46096	39427	2	11799931	11799994	6	10.7	91	0.896381	TCAACA	0.333333	0.388889	0.444444	0.407407	AT2G27660.1	AT2G27660	N/A	Cysteine/Histidine-rich C1 domain family protein [Source:TAIR;Acc:AT2G27660]		MGKPTTQNNSFINHFSHPHRLQLTPATSSPPCSACKLTGGNGRVYSCRPCNFSLHESCSKMKQVITHPSHPSHTLSLLVAPVYDGGYFNCDGCGIHGTGFSYQCSVCDFDIHALCAYKPLSIIHKSHPQHNLKLAFQSPYGANKGFSCDICRKIGKNQWLYRCIPCEFDAHVGCITGPNPHLLQHSTSAPNPHTHHAGHPQHQNSLPVPNQGSNRVRPMPMTRPNRTINPNRPIAQNAAVNGPRRQNNNLGYNAQVGPNGPNELTGQGSMDGSGYNGSASATNKEFDVDVDVDVDVDVDVDVDVEVEYEGDVYVEEANDEGEDVDGNDEGEDVDGNGLEIVACVDNLSVAYSESDFGSSSDARSQCNDLSDADLYPLSLDNTQGPRPVRMNQGSGGGRK…	DV
4.94163	43174	2	17160433	17160452	3	6.7	100	0.303382	CTA	0.333333	0.625	0.428571	0.382353	AT2G41170.1	AT2G41170	N/A	F-box protein At2g41170 [Source:UniProtKB/Swiss-Prot;Acc:Q6NKN8]		MEKQYLTFISFCFSITICGFLIVSWLARSIIRNGIRTLTWRKETKRKKKNQEDENKMSLLDLPDLTLDCILEKLSPSELCAMTSVCSELRDKCVSDHLWEKHMETKWGRLMGDAAIQEWKSHVATIMRCLTSSSSSSRKSKPNWSSRFVANLKPFAWLSSNHGCENRGSSSYLAPIDSVMYWYSNLENGKFWFPAQVYNRENGHVGFMMSCYDAKIRYDFKTDTFQARYSAHGRRAAEEKVTWQRLRPSQDDTKSRDLHVSDCLHGLRPGDHFEIQWRRTKEFPYGWWFGIVGHLQNCDGVQNCRCDSDENVVMEFRQFRPESPWRRTVIKRKDHRETGNEENGFYGGVKKLGTEEEISTWKQLWPSQALE	S
4.24189	44199	2	18878684	18878705	3	7.3	100	0.435838	TGA	0.333333	0.45	0.4	0.37037	AT2G45880.1	AT2G45880	BAM7	Beta-amylase 7 [Source:UniProtKB/Swiss-Prot;Acc:O80831]	Cterm	MATDMHKLLGTSEEDDDEEMDMDVKEEDDGDRRNRDKHAASGSSSNDEFMFQQSMQDQVGTPGGGGSRRSRPLEEKERTKLRERHRRAITARILGGLRRHGNYNLRVRADINDVIAALAREAGWVVLPDGTTFPSKSQGTKPTGGSSAVAAGSSASHIASQQTSPPALRVVSSGLRSPVELSSCRMKGVFTPAPSPYDMLPIQSPELVGSVNKAEGLVGCSVDVINSKQILEIPPNLTEQDFSGTPYVPVYVMLPLGVINMKCELADRDGLLKHLRILKSIHVDGVKVDCWWGIVEGHSPQEYNWTGYRQLFQMVRDLNLKIQVLMSFHECGGNVGDDVCIPLPHWVAEIGRTNPDIYFTDREGRRNPECLSWGIDKERILRGRTALEVYFDYMRSFRI…	H
4.3776	44242	2	18979874	18979893	3	6.7	100	0.303382	GAA	0.333333	0.588235	0.518519	0.426471	AT2G46220.1	AT2G46220	N/A	Uncharacterized conserved protein (DUF2358) [Source:TAIR;Acc:AT2G46220]		MAFLVRSPEIPTVSARIFSDANSSVISHVFMRRKATVSAIDARDLPGVKNPKSRLYWQFSAPVKEDYKISREEEEEEEEDKQSYYVNMGHAVRSIREEFPLLFYKELNFDIYRDDIVFKDPMNTFMGIDNYKSIFGALRFHGRIFFRALCVDIVSVWQPTENTLMIRWTVHGIPRGPWETRGRFDGTSEYKFDKNGKIYEHKVDNIAINSPPKFQMLTVQELVEAISCPSTPKPTYFEFGD	E
5.01357	63623	3	21470370	21470408	3	13	100	1.09264	GTT	0.333333	0.5	0.521739	0.481481	AT3G57990.1	AT3G57990	N/A	unknown protein; Has 1497 Blast hits to 1323 proteins in 52 species: Archae - 0; Bacteria - 4; Metazoa - 23; Fungi - 34; Plants - 61; Viruses - 0; Other Eukaryotes - 1375 (source: NCBI BLink). [Source:TAIR;Acc:AT3G57990]		MKASMKFREEQKPLFRAKVPLSILGLPFQSGIVAGESKELSLNLSTFFESGPSLKVAYRPNDSWNPFSLIVKTGSGSFGSPISSSMLMSAEFNLLGQGNPSFMLHFKPQFGDFSIKKSHSSSGFERNLIKSMNGSVSEDDSSIEVVDTPAVNGCGGGFRKVTVLPSTSAGDIAGLLSGVEVAARTSLPVRGRAVLNFRWGVRVPTEIRRDFDPTAAISLRRFPFLVMNKIGIEHVDGADAKVTKSTGDPGKVSGPAQFTTSGDVAEVIEELRTENKQLKRAVEDLREVISNVRPYSPATIDYGSHSKYRESERNNNNNNNNNNNNNGRSRADRWSSERTTTSDYGGKKSKEEGNVAEELKKALKGAA	N
3.67723	64270	3	22464634	22464656	3	7.7	100	0.516554	ATC	0.333333	0.368421	0.538462	0.392593		AT3G60790		F-box family protein	Nterm	MTTQSSSSSSSLPSSLSSTPPLLASNARCKVLRTGASSKGKGKGIKYPVDRISMLPDEMLQKILSTLSTKDAVITSTLSKRWVDQWKRIPHLCVDMRNIMRTNPTSYVHELSFRFAESMTKTLNNHRGHLESCTISHIQFIFLFIDRWIQTVTREKQTKEITLVNNIGCMTPFVRYNSLHLSPSAFCHPSLTSLSLTRYKLLEKAFKNCCNLKILKLYDIMSDVSVLSNVIKACSSLEVLVLQITFLNQASALKIENKKLEFLQVTWPCLMNRMEVNTPRLVIFDIKSIYCFGYSVEAPKLSMFKRDYWVGGMSYPHLSYHISSLAQEKIRIWLELMVSQIYHMKRTGSLSVSVDVRNPNEVEILKEVLLLWDGEMMDLEILFKNNNAPIEEGESFITG…	S
4.10101	67684	4	2619260	2619282	3	7.7	100	0.516554	CAT	0.333333	0.526316	0.608696	0.391304		AT4G05100		ATMYB74		MGRSPCCEKKNGLKKGPWTPEEDQKLIDYINIHGYGNWRTLPKNAGLQRCGKSCRLRWTNYLRPDIKRGRFSFEEEETIIQLHSIMGNKWSAIAARLPGRTDNEIKNYWNTHIRKRLLKMGIDPVTHTPRLDLLDISSILSSSIYNSSHHHHHHHQQHMNMSRLMMSDGNHQPLVNPEILKLATSLFSNQNHPNNTHENNTVNQTEVNQYQTGYNMPGNEELQSWFPIMDQFTNFQDLMPMKTTVQNSLSYDDDCSKSNFVLEPYYSDFASVLTTPSSSPTPLNSSSSTYINSSTCSTEDEKESYYSDNITNYSFDVNGFLQFQ	H
7.45568	82390	5	904563	904590	3	9.3	100	0.78188	AAG	0.333333	0.375	0.535714	0.411765	AT5G03570.1	AT5G03570	IREG2	Solute carrier family 40 member 2 [Source:UniProtKB/Swiss-Prot;Acc:F4KGN5]	Nterm	MEEETETRVFLSNEQHQEEEEEEEEEPSLPRSMVISLYLGYFLARWGARTWEFSVALYMIYLWPNSLFLTAMYGVVESGSATLFGPIVGQMIDGMSYVKVLRLWLVTQNLSFIVAGGAVVALLVVPDLKSQNFPVFATLVVLTNLSGAIGVLSTLAGTVLIERDWVVVMSEGHSPAVLTRMNSVIRGIDLSSKLLSPVITGLIISFVSLRASAITFAAWATITVWIEYWLFISVYNGVPAIVQSDERRSLRSSQSQAEETDSASSFYVPLLHEEESYRNTQSRSRILRILERISESSFVSAWRNYLNQEIVLPGVSLALLFFTVLSFGTLMTATLEWKGIPTYIIGIGRGISAGVGLAATVLYPLMQSRISPLRTGVWSFWSQWTCLLVCVGSIWVEKE…	E
3.80931	87214	5	8083353	8083441	3	29.7	93	0.865453	GAT	0.333333	0.705882	0.423077	0.423358	AT5G23950.1	AT5G23950	N/A	Calcium-dependent lipid-binding (CaLB domain) family protein [Source:TAIR;Acc:AT5G23950]	Cterm, D/A/D (first D)	MSSHGREVEVTISSAKDIKNVNWRNGPNKPYAVVWIDPKFKSSTRVDEDGNTCTTWNETFVIALPPANDDDDKVYINIVHAGREENTKPLIGSAHLSLRDVIDDVGFGVPFMKTLKLKRPSGRPQGKLDVTVTVRETPGSNYALPYGDPYAPEKGSKFGGMGTGLAVGAVAGVLGGVALAEGLEAVEGDEDDDDDDDAAAAAAADDDDDDDDDDDDDDE	D
9.66351	87329	5	8200568	8200587	3	6.7	100	0.303382	CAT	0.333333	0.5	0.37931	0.407407	AT5G24190.1	AT5G24190	N/A	Lipase class 3-related protein [Source:TAIR;Acc:AT5G24190]		MPDVKLDIRCILDNLHQGPRTIHAIQAIRAMIDKHSESAIWLAGHSLGAALVLLAGKTMKISGFLLESYIFNPPIISIPLEQLPGGVLLKGVFRITESLVKATAATVTMALTDQRVQEDSKTALWIPYLYVNPADPICAGYIDYFKHKIFMSKIGASHIERIGSRSSFRNPWTRRIGTSSSSSSPLSDLSMEPLHLLPSADMTVNKNKSASSMAAHGLHQWWEQDSVLRKNWKNCLIRPDPGDKS	S
4.459	95711	5	15010749	15010773	3	8.3	100	0.6266	CTC	0.666667	0.3125	0.586207	0.481481	AT5G37790.1	AT5G37790	N/A	Protein kinase superfamily protein [Source:TAIR;Acc:AT5G37790]	multiple STRs,E/A	MGFYEGASVHPRTPENKNTVNIPILTSSSSSSDLDGDNNDNNNNTGIKTLLKRMIFDLGFACFLPPLSSTENSGNNNGGGTSGGGGGGGGGGENNKAWLLAETAPENMNPDPHSVHSSFRFSLCSQIELEKMKGEEPSLSASSSCRNLSVSGGSTTVLMVNLENGVKETTGNATDDLRWTRARSLEKSISPVANTLVRFSYGEIVAATRNFSKGRVLGRGACSYVFRGKIGMWRTALAIKRLDKEDKESPKSFCRELMIASSLHSSNIVPLLGFCIDPEEGLFLVYKYVSGGSLEHYLHDKKKKKGVKAAFGLPWSARYKVALGIADAIAYLHNGTEQCVVHRDIKPSNILLSSKKIPKLCDFGLATWTAAPSVPFLCKTVKGTFGYLAPEYFQHGKIS…	E
5.07284	96343	5	15464170	15464190	3	7	100	0.37134	GTT	0.333333	0.5	0.413793	0.348148	AT5G38620.1	AT5G38620	N/A	MADS-box transcription factor family protein [Source:TAIR;Acc:AT5G38620]		MVKGTKRKIAIETIQKRDSLRVTCTKRRKGLYSKASQLCLLSDAQIAILATPPSSESDVSFYSFGHSSVDAVVSAFLSGKRPVSAPKDNKETREDVGICLTRKNLGLGFWWNDESLVRSENPQEISEAIGSMWTLLSNLKELRADEACVNDHKDLKKNEKSDVHGTQDQTLIFQSASAVCCIPENLNDITQEPNQTLDIQSSSSAICCVPDKSPEIFNEITEEQDQILSICETFCVTDNNNNNNNNAALPEVNLYYNQDMAIDQLIDFNTPFESSIDDWFSDNTTHQETTSASILNDVGVDDQVSVDTNPFSYFQSLEDADLVFQRCLDGDNLRFSDCFNDFANTIAAV	N
3.86309	101400	5	21411193	21411214	3	7.3	100	0.435838	TAC	0.333333	0.5	0.37931	0.4	AT5G52830.1	AT5G52830	WRKY27	Probable WRKY transcription factor 27 [Source:UniProtKB/Swiss-Prot;Acc:Q9FLX8]	multiple STRs	MSSEDWDLFAVVRSCSSSVSTTNSCAGHEDDIGNCKQQQDPPPPPLFQASSSCNELQDSCKPFLPVTTTTTTTWSPPPLLPPPKASSPSPNILLKQEQVLLESQDQKPPLSVRVFPPSTSSSVFVFRGQRDQLLQQQSQPPLRSRKRKNQQKRTICHVTQENLSSDLWAWRKYGQKPIKGSPYPRNYYRCSSSKGCLARKQVERSNLDPNIFIVTYTGEHTHPRPTHRNSLAGSTRNKSQPVNPVPKPDTSPLSDTVKEEIHLSPTTPLKGNDDVQETNGDEDMVGQEVNMEEEEEEEEVEEDDEEEEDDDDVDDLLIPNLAVRDRDDLFFAGSFPSWSAGSAGDGGG	T
3.70627	98378	5	17507387	17507415	2	14.5	100	1.1022	TA	0	0.526316	0.538462	0.222222	AT5G43570	AT5G43570		Predicted to encode a PR (pathogenesis-related) peptide that belongs to the PR-6 proteinase inhibitor family.	Cterm	MSDVCQNTAGEGMKSSWPELVGRRGEEVKEIIDRENTKVTAKIISENAVVLAVVICDRVYVRVNDQGIVTRTPISLANLIVIYIYIYIYICVCVCESIMDLNM	IY
3.6682	44082	2	18706188	18706207	3	6.7	100	0.303382	GTT	0.333333	0.45	0.55	0.464286	AT2G45400	AT2G45400	BEN1	BRI1-5 ENHANCED 1, involved in the regulation of brassinosteroid metabolic pathway	Nterm	MVREEQEEDDNNNNNNGGGERKLLVADETVPSLLDETGLVCVTGGSGFVASWLIMRLLQRGYSVRATVRTNSEGNKKDISYLTELPFASERLQIFTADLNEPESFKPAIEGCKAVFHVAHPMDPNSNETEETVTKRTVQGLMGILKSCLDAKTVKRFFYTSSAVTVFYSGGNGGGGGEVDESVWSDVEVFRNQKEKRVSSSYVVSKMAAETAALEFGGKNGLEVVTLVIPLVVGPFISSSLPSSVFISLAMLFGNYKEKYLFDTYNMVHIDDVARAMIFLLEKPVAKGRYICSSVEMKIDEVFEFLSTKFPQFQLPSIDLNKYKVEKRMGLSSKKLKSAGFEFKYGAEEIFSGAIRSCQARGFL	N
																		terminal	11
																		AA	count	freq
																		K	1	0.047619
																		D	1	0.047619
																		E	3	0.142857
																		G	1	0.047619
																		H	2	0.0952381
												terminal	non-terminal					S	4	0.190476
											div	11	10					Q	1	0.047619
											stab	15	41					N	2	0.0952381
																		T	2	0.0952381
																		P	0	0
																		M	0	0
																		V	0	0
																		F	0	0
																		R	1	0.047619
																		L	0	0
																		total	21	0.857143

## Sheet: coding_purifying_113016
ID	codzscores[codzscores < (stab_thresh)]	Chromosome	TAIR10start	TAIR10end	Unit.Size	X..of.Units	Purity	TRF.score	VARscore	Consensus	GC_content	ta_gc	la_gc	scan_gc	str	gene	Representative Gene Model Name	Gene Description	Primary Gene Symbol	note	seq	unit
212	-3.80967	1	355579	355598	3	6.7	100	40	0.303382	TCT	0.333333	0.625	0.538462	0.42029	212	AT1G02030	AT1G02030.1	C2H2-like zinc finger protein; FUNCTIONS IN: sequence-specific DNA binding transcription factor activity, zinc ion binding, nucleic acid binding; INVOLVED IN: regulation of transcription; LOCATED IN: intracellular; CONTAINS InterPro DOMAIN/s: Zinc finger, C2H2-like (InterPro:IPR015880), Zinc finger, C2H2-type (InterPro:IPR007087); BEST Arabidopsis thaliana protein match is: C2H2-like zinc finger …	ZAT1		MEERHKCKLCWKSFANGRALGGHMRSHMLIHPLPSQPESYSSSMADPGFVLQDRESETESSKKPSRKRSRLNRRSISSLRHQQSNEEGKSETARAADIKIGVQELSESCTEQEPMSSVSDAATTEEDVALSLMLLSRDKWEKEEEESDEERWKKKRNKWFECETCEKVFKSYQALGGHRASHKKKIAETDQLGSDELKKKKKKSTSSHHECPICAKVFTSGQALGGHKRSHASANNEFTRRSGIIISLIDLNLPAPSEEEEMASSVF	K
1360	-4.10146	1	2165087	2165113	3	8.7	92	47	0.548103	TCT	0.333333	0.375	0.413793	0.37037		AT1G07050		CCT motif family protein	N/A	E/K, Nterm	mdtqrlpkkeeeeeedhllsstfesinghsrdqhnhsiddfesifditidnlscsneltwdfweedededvgeeekrsstdqegssfgfwenkptdyedkdlglklnlnhqevidawsdhqkplwtdtstldnsvyrgevpvieekrnmrreasvlrykekrqsrlfskkiryqvrklnadkrprfkvsflflllstl	E
1855	-5.22033	1	3146868	3146895	3	9.3	92	49	0.646654	ATC	0.333333	0.4375	0.482759	0.4	1855	AT1G09720	AT1G09720.1	Kinase interacting (KIP1-like) family protein; CONTAINS InterPro DOMAIN/s: KIP1-like (InterPro:IPR011684); BEST Arabidopsis thaliana protein match is: kinase interacting family protein (TAIR:AT1G58210.1); Has 36531 Blast hits to 24166 proteins in 1497 species: Archae - 615; Bacteria - 4202; Metazoa - 18004; Fungi - 3193; Plants - 2001; Viruses - 107; Other Eukaryotes - 8409 (source: NCBI BLink).	NET2B		MLQRAASNAYSWWWASHIRTKQSKWLEHNLQDMEEKVKYTLKIIDGDGDSFAKRAEMYYRKRPEIVNFVEEAFRSYRALAERYDHLSTELQSANHMIATAFPEHVPFPLVDDDDDDDDDNPKKPPKHLHLIPSGTNIPQVPEVPKKEFKSQSLMVLSRKEPGVLQSSETSSALVSSGLSREEALEEIDKIHKGILVLQTEKEFVRSSYEQSYDRYWNLENEVEEMQKRVCSLQDEFGVGGEIEDGEARTLVATAALSSCKETIAKLEETQKRFSEDAGIEKERIDTATERCEALKKKFEIKVEEQAKKAFHGQESSYESVKESRQIDLNENLSNVDFAEKIDELVEKVVSLETTALSHTALLKTLRSETNELQDHIRDVEKDKACLVSDSMDMKKRITV…	D
3384	-4.82896	1	5639489	5639520	3	11	90	52	0.835069	TCA	0.333333	0.5625	0.464286	0.426471	3384	AT1G16500	AT1G16500.1	unknown protein; BEST Arabidopsis thaliana protein match is: unknown protein (TAIR:AT1G79160.1); Has 136 Blast hits to 134 proteins in 17 species: Archae - 0; Bacteria - 0; Metazoa - 0; Fungi - 4; Plants - 131; Viruses - 1; Other Eukaryotes - 0 (source: NCBI BLink).	N/A	H/S	MAADVSSLVRILSRFKDDRTVVKDSTGPRSTVALMTRDLLGIGGCVGGGGGGDEQSLELDLDVQVPNGWEKRLDLKSGKVYLQQQCNSTSSSSSSHHHHHHHEDQTNQTVPRFQDLNVPPISDKFPAKPLLSLFDDDDDTSLELKLVPSSISRPLPPPLSSFSPNQSLSYLSSVCTLDKVKLALERAEKDTKKRQSPEDDGVYDGTASATVAASQVAAGCPGCLSYVFVAKNNPKCPRCHSFVPLPAMKKPKIDLNISM	H
4021	-4.66035	1	6550992	6551020	3	9.7	92	51	0.705979	GAA	0.333333	0.352941	0.571429	0.407407	4021	AT1G18950	AT1G18950.1	DDT domain superfamily; CONTAINS InterPro DOMAIN/s: DDT domain (InterPro:IPR004022); BEST Arabidopsis thaliana protein match is: unknown protein (TAIR:AT5G25580.1); Has 20293 Blast hits to 13585 proteins in 823 species: Archae - 41; Bacteria - 1919; Metazoa - 8043; Fungi - 2539; Plants - 1031; Viruses - 220; Other Eukaryotes - 6500 (source: NCBI BLink).	DDR4		MGSSSDIVPDRSPADDVAPVTDTKIPKEEPLTLRRTRPSRACTVRAQQRLQELQAAERKLKPPKKEYKREQHRRREEVVEEDEDSEDDDQEDEENDGDDESNPKQCVAGGSSTKIITSLVPPPEPSQMPRWNLRSMWELASVLNFLHVFRPLLKINAEFSAEEFETALLTPNDTLSDIHIPLLKAIPPVTRMALTRDTWVTVLCRKIRDCWHWVAEGDLPIVALQGREIEVYKNLDPAIRVVILKALCDIRVEQEDIRSYIDNSLKTGVHLSVFRKDRVGGDSHGVNFWYEEDPLIGHRLYREIRKAEVLKVKTKGSKILPNITYQWETVATNFDEFQDVSEKLLQSSSRIEVSLGKKLVKDMLPEIEKEHKRKEKLLKKQHRQALLLDNFVVVDGLAG…	E
4175	-5.99189	1	6764197	6764221	3	8	91	43	0.399598	GAA	0.333333	0.352941	0.464286	0.303704	4175	AT1G19530	AT1G19530.1	unknown protein; FUNCTIONS IN: molecular_function unknown; INVOLVED IN: N-terminal protein myristoylation, anaerobic respiration; LOCATED IN: cellular_component unknown; EXPRESSED IN: leaf apex, inflorescence meristem, hypocotyl, root, flower; EXPRESSED DURING: petal differentiation and expansion stage; Has 47 Blast hits to 47 proteins in 13 species: Archae - 0; Bacteria - 0; Metazoa - 0; Fungi -…	N/A	hard to see but apparently there	MGSLMSGWDSRVRDPKSVRRCKSLTREEIDTFWKTKKKNEEEEHVQAFSKLVTQEGAQSQAKEKKSVDDLFENQSKSSGWWRKTYWAFLNEPREEEGRPNNYVSQFKVAHIAKIAGS	E
4208	-4.12242	1	6834122	6834141	3	6.7	100	40	0.303382	TTC	0.333333	0.625	0.413793	0.362963	4208	AT1G19780	AT1G19780.1	member of Cyclic nucleotide gated channel family	CNGC8		MYKSQYISGHREKFVRLDDTDSRVSMSSNATGMKKRSCFGLFNVTSRGGGKTKNTSKSFREGVKIGSEGLKTIGKSFTSGVTRAVFPEDLRVSEKKIFDPQDKTLLLWNRMFVISCILAVSVDPLFFYLPIVDNSKNCIGIDSKLAVTTTTLRTIIDVFYLTRMALQFRTAYIAPSSRVFGRGELVIDPAKIAERYLTRYFIVDFLAVLPLPQIAVWKFLHGSKGTDVLPTKQALLHIVITQYIPRFVRFIPLTSELKKTAGAFAEGAWAGAAYYLLWYMLASHITGAFWYMLSVERNDTCLRSACKVQPDPKVCVQILYCGSKLMSSRETDWIKSVPDLFKNNCSAKSDESKFNYGIYSQAVSSGIVSSTTFFSKFCYCLWWGLQNLSTLGQGLQTST…	E
4809	-4.23601	1	7735064	7735089	3	8.7	91	45	0.530293	AGA	0.333333	0.411765	0.5	0.414815	4809	AT1G21980	AT1G21980.1	Type I phosphatidylinositol-4-phosphate 5-kinase. Preferentially phosphorylates PtdIns4P. Induced by water stress and abscisic acid in Arabidopsis thaliana. Expressed in procambial cells of leaves, flowers and roots. A N-terminal Membrane Occupation and Recognition Nexus (MORN)affects enzyme activity and distribution.	PIP5K1	E/D, Nterm	MSDSEEDEEEEEASEVILSSVVQKKKKKNLRFGEEVERRDGLVLLAQSTPMVRSRSQGTTRRVTPTPLVDVEKPLPNGDLYIGSFSGGFPHGSGKYLWKDGCMYEGDWKRGKASGKGKFSWPSGATYEGEFKSGRMEGFGTFTGADGDTYRGTWVADRKHGHGQKRYANGDFYEGTWRRNLQDGRGRYVWRNGNQYTGEWRSGVISGKGLLVWPNGNRYEGLWENGIPKGNGVFTWSDGSSCVGAWNESNIMRSFFNGVEKNDLIVGNRKRSSVDSGAGSLGGEKVFPRICIWESDGEAGDITCDIIDNVEASMIYRDRISVDRDGFRQFKKNPCWFNGEAKKPGQTISKGHKKYDLMLNLQLGIRYSVGKHASIVRDLKQTDFDPKEKFWTRFPPEGT…	E
6180	-4.47491	1	9556481	9556504	3	8	90	41	0.379879	TTC	0.333333	0.5	0.541667	0.375	6180	AT1G27510	AT1G27510.1	FUNCTIONS IN: DNA binding, nuclease activity; INVOLVED IN: response to singlet oxygen; LOCATED IN: thylakoid membrane; EXPRESSED IN: 22 plant structures; EXPRESSED DURING: 13 growth stages; CONTAINS InterPro DOMAIN/s: Protein of unknown function DUF3506 (InterPro:IPR021894), UvrB/UvrC protein (InterPro:IPR001943); BEST Arabidopsis thaliana protein match is: Protein of unknown function (DUF3506) (…	EX2	E/V	MATTQPCLIGQIIAVPQFHILFSPRNSLKPELSTNKRTNFSVSIGLRHSFASSISTCNPKAPSLSCLRNCAAVDGADTSSSEDKWDWDWDRWNRHFSEIEEVESVVSLLKSQLEDAVEKEDFEEAVKLKQAISEATVDDAVAEIMRQLQTAVNEERYHDASRLCNETGSGLVGWWVGLPRDSEEPFGRIVHITPGVGRFIGKSYSPRQLVAEAAGTPLFEIFVIKDTDGGYVMQVVYVQHVKQNLTISENSFSKVQQSSKSSINDPSILDVRGSELKVDKKEDTQLNAGEPTEEGIKNVIKFLKDKIPGLKLKVMDVIKIPEEEIVGSDDATEELVGEGTEETNSSDDEEEVEEEENDSIEAISSMDSADYGKHSNTKLVIGGVLHNIEDSSIDDEIVR…	E
19403	-3.59331	1	21554083	21554111	3	10	92	53	0.747237	GAA	0.333333	0.444444	0.333333	0.325926	19403	AT1G58210	AT1G58210.1	Encodes a member of the NET superfamily of proteins that potentially couples different membranes to the actin cytoskeleton in plant cells. It colocalizes with filamentous actin and is localized to the plasma membrane.	EMB1674	E/K	MTTTRAKSKFQSLSACRFTPLPEPNTSPSTYSKTLPKPNSSPGTDGTFPTPFPLAVITPIKTLKSVTLSDWWLTKKGKDLCIKGFESNGASGVRLFSSGTISKRHESTTLEAIDGITISINGFINRSRCLENGISIEVCNRFRLGFPYDWEDYNEEEEEKKKKNVDISFDDIPVNRYQDLYSLEGCLKDKILDDVVGSLRDLVCQKSDKACEKSRVGDVDDDDDDDDDKSLVSRVVGVKTRGMLRRREEYEASIGKRVATMSGKRVVTVSKKKNRRRSFGW	E
22582	-4.39005	1	25622205	25622228	3	8	90	41	0.379879	CTC	0.666667	0.625	0.517241	0.488889	22582	AT1G68360	AT1G68360.1	C2H2 and C2HC zinc fingers superfamily protein; FUNCTIONS IN: sequence-specific DNA binding transcription factor activity; INVOLVED IN: regulation of transcription; LOCATED IN: intracellular; EXPRESSED IN: 12 plant structures; EXPRESSED DURING: 4 anthesis, F mature embryo stage, petal differentiation and expansion stage, E expanded cotyledon stage, D bilateral stage; CONTAINS InterPro DOMAIN/s: Z…	N/A		MEELDFSSKTTTSRLKLFGFSVDGEEDFSDQSVKTNLSSVSPERGEFPAGSSGRSGGGVRSRGGGGGGGERKYECQYCCREFGNSQALGGHQNAHKKERQQLKRAQLQATRNAAANFSNAGSASQFLRNPIVSAFAPPPHLLSSSAVPQPMGGPWMYLPRVSPSQLHVSHGCVIQDGSGGAGAGGFSYEYGARDSGFGVVGAQMRHVQAHGPRPSVNGFSREVGTTFDDGLGLDLHLSLAPAGH	G
27095	-4.68236	2	1187750	1187778	3	9.7	92	51	0.705979	GAA	0.333333	0.4375	0.517241	0.355556	27095	AT2G03890	AT2G03890.1	Phosphoinositide kinase which undergo autophosphorylation and phosphorylate serine/threonine residues of protein substrates. Contains phosphoinositide 3/4-kinase and ubiquitin-like domains.	PI4KG7	E/D	MSRNLDSPVQTQMAVAVFKTPLTGASKMEGKQHHKHQHLQRQSSGRRVFVQTETGCVLGMELDRSDNVHTVKRRLQIALNFPTEESSLTYGDMVLTNDLSAVRNDSPLLLKRNFMHRSSSTPCLSPTGRDLQQKDRSGPIEILGHSDCFSIVKHMVKDIVKAMKMGVEPLPVHSGLGGAYYFRNKRGESVAIVKPTDEEPFAPNNPKGFVGKALGQPGLKSSVRVGETGFREVAAYLLDYGRFANVPPTALVKITHSVFNVNDGVKGNKPREKKLVSKIASFQKFVAHDFDASDHGTSSFPVTSVHRIGILDIRIFNTDRHGGNLLVKKLDGVGMFGQVELIPIDHGLCLPETLEDPYFEWIHWPQASLPFSDEEVDYIQSLDPVKDCDMLRRELPMIR…	E
39513	-3.56627	2	11922991	11923011	3	7	100	42	0.37134	ATC	0.333333	0.36	0.6	0.348148	39513	AT2G27990	AT2G27990.1	Encodes a BEL1-like homeobox gene that functions together with PNY in meristem maintenance by regulating the allocation process during vegetative and reproductive development. Both gene products are required for the competence of the SAM to respond properly to floral inductive signals.	BLH8	homolog bel1 below	MDMIKPDFQQIRRDKFRVEQMNDFPNTWTQQQHQNIRIPNNLDLIGILQNQISVPVQTDLYQDSAATFMNMPQSIHRDPQGPSNWRISDLSQPSTVNHGYDQAGIRPNNVADLLSDHFSSRNQILDRPLYVGRDSIPQSSMIRRSEVSCLDDNQKGCVTVACSGTGNEILRSSYDQGSSSGSYRGEFSFLPSLENQSVAHNASNWNHGPVNVTATSHTNSKKGFPLSLLSDIPPSRDVGNAAVLSTMNIHGPLGPFTGYASILKSSRFLEPAQKMLEEFCISYASKIISRSESTSMEDDDDDDDNLSGFSSSSEPLEPKNRLKKAKLLFLQEEVCKWYKLYNHQLQTVMSSFNTVAGLNTATPYISLALKRTSRSFKALRTAIAEHVKQISSHSSNGNN…	D
41916	-3.80967	2	15269875	15269894	3	6.7	100	40	0.303382	GAT	0.333333	0.375	0.571429	0.411765	41916	AT2G36390	AT2G36390.1	Encodes a starch branching enzyme (EC.2.4.1.18) similar to SBE2 from maize and rice. Expressed throughout plant tissues.	SBE2.1	Cterm	MVYTISGVRFPHLPSIKKKNSSLHSFNEDLRRSNAVSFSLRKDSRSSGKVFARKPSYDSDSSSLATTASEKLRGHQSDSSSSASDQVQSRDTVSDDTQVLGNVDVQKTEEAQETETLDQTSALSTSGSISYKEDFAKMSHSVDQEVGQRKIPPPGDGKRIYDIDPMLNSHRNHLDYRYGQYRKLREEIDKNEGGLEAFSRGYEIFGFTRSATGITYREWAPGAKAASLIGDFNNWNAKSDVMARNDFGVWEIFLPNNADGSPAIPHGSRVKIRMDTPSGIKDSIPAWIKYSVQPPGEIPYNGVYYDPPEEDKYAFKHPRPKKPTSLRIYESHVGMSSTEPKINTYANFRDDVLPRIKKLGYNAVQIMAIQEHAYYASFGYHVTNFFAPSSRFGTPDDLK…	D
43118	-5.09662	2	17044407	17044428	3	7.3	100	44	0.435838	AGT	0.333333	0.4375	0.592593	0.481752	43118	AT2G40830	AT2G40830.2	Encodes a putative RING-H2 finger protein RHC1a.	RHC1A		MSSSRNTHWCHRCQRAVRLHGQEPVCFYCGGGFVEELDMAQASPFDMFRSHRGVVERDQTFDLMDAFSVFMRNRLAERSHDREIRGRTISSGPENFPGLAPLLIFGGQVPYRLTGDNAVEALFNGGSPGIGITRGNTGDYFFGPGLEELFEQLSAGTTRRGPPPAPRSAIDALPTIKIAQRHLRSSDSNCPVCKDEFELGSEAKQMPCNHIYHSDCIVPWLVQHNSCPVCRQELPSASGPSSSQNRTTPTRNYRSSSSSSSSNSRENGNERRNPFSSFWPFRSSGSSSSSTQNRGGTRNSDTSDENHNYHQQQHQQSYMGYSGWPFDY	S
43528	-4.41497	2	17688554	17688579	3	8.7	91	45	0.530293	TCA	0.333333	0.5625	0.444444	0.379562	43528	AT2G42480	AT2G42480.1	TRAF-like family protein; CONTAINS InterPro DOMAIN/s: TRAF-like (InterPro:IPR008974), MATH (InterPro:IPR002083); BEST Arabidopsis thaliana protein match is: TRAF-like family protein (TAIR:AT2G42470.1); Has 20820 Blast hits to 13670 proteins in 1127 species: Archae - 516; Bacteria - 2848; Metazoa - 7681; Fungi - 1563; Plants - 1737; Viruses - 68; Other Eukaryotes - 6407 (source: NCBI BLink).	N/A	D/Y	MWNQKPCFRFEIDNFSEKKDVIASKAFVSGGCEWFLYLYPKGQSLNDDHMSLYLSVANSKSLGSGWKRSAKFYFSVLNESDKELYRSTISQEFCLFCVQALAWGIRKALPLSKFEEKGFLEKDKLIVEVYIKNFEAVDGEGGGVSKKEEEETVEIIGSQDYASQVTLVRKIFAEHPEIAEEFKPKNQVFKKEYMNILRNAYRKVSELAEVKMDWVKSKIEEVSLEIKKRNDEVSEVPLDNKIADDDDDDYDEWEQDIEERLKNLEGMEFDSKLDSLKSKLDEISLERKKSYDADGSRVQQLEERVKDIELILKSKLEEVSSEKKKKADADGSLEDRVKNLELMVSDLKVEVDNEKAKSSADGFLLVEEVA	D
43566	-4.14965	2	17748449	17748469	3	7	100	42	0.37134	AAG	0.333333	0.75	0.68	0.510791	43566	AT2G42610	AT2G42610.1	LIGHT SENSITIVE HYPOCOTYLS 10 (LSH10); CONTAINS InterPro DOMAIN/s: Protein of unknown function DUF640 (InterPro:IPR006936); BEST Arabidopsis thaliana protein match is: Protein of unknown function (DUF640) (TAIR:AT1G07090.1); Has 309 Blast hits to 309 proteins in 18 species: Archae - 0; Bacteria - 0; Metazoa - 12; Fungi - 0; Plants - 297; Viruses - 0; Other Eukaryotes - 0 (source: NCBI BLink).	LSH10	Cterm,multiple strs	MSSPRERGKSLMESSGSEPPVTPSRYESQKRRDWNTFGQYLKNQRPPVPMSHCSCNHVLDFLRYLDQFGKTKVHVPGCMFYGQPEPPAPCTCPLRQAWGSLDALIGRLRAAYEENGGPPETNPFASGAIRVYLREVRECQAKARGIPYKKKKKKKPTPEMGGGREDSSSSSSSFSFS	K
43900	-4.12502	2	18338587	18338612	3	8.7	91	45	0.530293	TCC	0.666667	0.375	0.5	0.441176	43900	AT2G44440	AT2G44440.1	Emsy N Terminus (ENT) domain-containing protein; FUNCTIONS IN: molecular_function unknown; INVOLVED IN: biological_process unknown; LOCATED IN: cellular_component unknown; EXPRESSED IN: 17 plant structures; EXPRESSED DURING: 9 growth stages; CONTAINS InterPro DOMAIN/s: ENT (InterPro:IPR005491); BEST Arabidopsis thaliana protein match is: Emsy N Terminus (ENT)/ plant Tudor-like domains-containing …	EML4	Nterm	MDCKSSDSSGTDDDLPPSHRVPRGGGGGRGGRVAGNGRPLNLPPSYPKMYDDLAADMEAQIHQIEKEAYISVLRAFKAQGDAISWEKESVITELRKELSLSNEEHRELLGRVNSDDTIRRIREWRQSGGMQPSMRNAAQVVHDTLPSPSVSASMKTHKPNQPIPSQPFASSSPSFHPQADPTHPFASSTAKRGPVPIVKGKKHKPVFPGSSSTKHAPYHPSDQPPRGQVMNRLPSVPASSSEPTNGIDPESFLGRRVRTKWPEDNTFYDAIITQYNPVEGRHALVYDIATPSETWEWVRLSEISPGDIEWIGEDPGLGNRYNGQGHGLNRTTGPNCVPQRGSGLEKNTIRKGFRTSQNGTGKKKHLDIRIRQTDVLIREVERVLRSHNPDPYEVERAKR…	G
45654	-3.74974	3	1814032	1814058	3	9	91	47	0.581349	GAA	0.333333	0.36	0.526316	0.345588	45654	AT3G06020	AT3G06020.1	A member of the FAF family proteins encoded by the FANTASTIC FOUR (FAF) genes: AT4G02810 (FAF1), AT1G03170 (FAF2), AT5G19260 (FAF3) and AT3G06020 (FAF4). FAFs have the potential to regulate shoot meristem size in Arabidopsis thaliana. FAFs can repress WUS, which ultimately leads to an arrest of meristem activity in FAF overexpressing lines.	FAF4	E/K	MATVVYQSYFESQHFEPRALRLRLSSHTNPQLSTPLKSHFQNSSIAPQDNPITINAASLPSSSPNPSSNSDTNSGSWSFLESLSNSSSNDKEKKTLPLFQSPSSRRTLSDESLALCTESLGSETGSDIIHEDMFSISSELQTMETRTTSTTSNPSRQDRKRNTMASLPPPLTSMIGFDCIEVKSHRENGRLVMMATRPPPRNRCLQDRSNGCVRLAILIDSDDHIETETKEEKEEEEEETIETVRDNEEEIPEYKEEEEEKEEEIKVKGVEKVQRSRRCIEGDRENRGFLNWESLCVATS	E
45797	-4.0565	3	2005871	2005895	3	8.3	90	43	0.438104	CCA	0.666667	0.333333	0.407407	0.540741	45797	AT3G06490	AT3G06490.1	putative transcription factor MYB108 (MYB108) mRNA,	MYB108	multiple strs	MDEKGRSLKNNNMEDEMDLKRGPWTAEEDFKLMNYIATNGEGRWNSLSRCAGLQRTGKSCRLRWLNYLRPDVRRGNITLEEQLLILELHSRWGNRWSKIAQYLPGRTDNEIKNYWRTRVQKHAKQLKCDVNSQQFKDTMKYLWMPRLVERIQSASASSAAAATTTTTTTTGSAGTSSCITTSNNQFMNYDYNNNNMGQQFGVMSNNDYITPENSSVAVSPASDLTEYYSAPNPNPEYYSGQMGNSYYPDQNLVSSQLLPDNYFDYSGLLDEDLTAMQEQSNLSWFENINGAASSSDSLWNIGETDEEFWFLQQQQQFNNNGSF	T
46108	-4.21303	3	2514215	2514239	3	8.3	90	43	0.438104	ACA	0.333333	0.375	0.482759	0.496296	46108	AT3G07880	AT3G07880.1	SUPERCENTIPEDE1 (SCN1); FUNCTIONS IN: Rho GDP-dissociation inhibitor activity; INVOLVED IN: root epidermal cell differentiation, cell tip growth; LOCATED IN: cytoplasm; EXPRESSED IN: 25 plant structures; EXPRESSED DURING: 15 growth stages; CONTAINS InterPro DOMAIN/s: Immunoglobulin E-set (InterPro:IPR014756), RHO protein GDP dissociation inhibitor (InterPro:IPR000406); BEST Arabidopsis thaliana p…	GDI1	N/K, Nterm	MSLVSGARDMGFDDNNNNKNNKDGDDENSSSRTRADDDALSRQMSESSLCATEEEEDDDSKLQLGPQYTIKEHLEKDKDDESLRKWKEQLLGSVDVTNIGETLDPEVRIDSLAIISPGRPDIVLLVPENGNPKGMWFTLKEGSKYNLKFTFHVNNNIVSGLRYTNTVWKTGVKVDRAKEMLGTFSPQLEPYNHVMPEETTPSGMFARGSYSARTKFLDDDNKCYLEINYSFDIRKEWPAL	N
46146	-5.21414	3	2583881	2583908	3	9.3	92	49	0.646654	TCA	0.333333	0.4375	0.482759	0.362963	46146	AT3G08510	AT3G08510.1	Phosphoinositide-specific phospholipase C (PI-PLC), catalyzes hydrolysis of phosphatidylinositol 4,5-bisphosphate into inositol 1,4,5-trisphosphate and diacylglycerol.	PLC2		MSKQTYKVCFCFRRRFRYTASEAPREIKTIFEKYSENGVMTVDHLHRFLIDVQKQDKATREDAQSIINSASSLLHRNGLHLDAFFKYLFGDNNPPLALHKVHHDMDAPISHYFIFTGHNSYLTGNQLSSDCSEVPIIDALKKGVRVIELDIWPNSNKDDIDVLHGMTLTTPVGLIKCLKAIRAHAFDVSDYPVVVTLEDHLTPDLQSKVAEMVTEIFGEILFTPPVGESLKEFPSPNSLKRRIIISTKPPKEYKEGKDVEVVQKGKDLGDEEVWGREVPSFIQRNKSEAKDDLDGNDDDDDDDDEDKSKINAPPQYKHLIAIHAGKPKGGITECLKVDPDKVRRLSLSEEQLEKAAEKYAKQIVRFTQHNLLRIYPKGTRVTSSNYNPLVGWSHGAQMV…	D
46206	-3.5335	3	2670644	2670663	3	6.7	100	40	0.303382	CAA	0.333333	0.625	0.64	0.496403	46206	AT3G08790	AT3G08790.1	ENTH/VHS/GAT family protein; FUNCTIONS IN: protein transporter activity; INVOLVED IN: intracellular protein transport, intra-Golgi vesicle-mediated transport; LOCATED IN: Golgi stack, intracellular; CONTAINS InterPro DOMAIN/s: VHS (InterPro:IPR002014), GAT (InterPro:IPR004152), VHS subgroup (InterPro:IPR018205), ENTH/VHS (InterPro:IPR008942); BEST Arabidopsis thaliana protein match is: ENTH/VHS/G…	N/A		MVHPLVDRATSDMLIGPDWAMNLEICDMLNHEPGQTREVVSGIKKRLTSRTSKVQLLALTLLETIITNCGELIHMQVAEKDILHKMVKMAKRKPNIQVKEKILILIDTWQESFSGPQGRHPQYYAAYQELLRAGIVFPQRPQITPSSGQNGPSTRYPQNSRNARQEAIDTSTESEFPTLSLTEIQNARGIMDVLAEMMNAIDGNNKEGLKQEVVVDLVSQCRTYKQRVVHLVNSTSDESMLCQGLALNDDLQRLLAKHEAIASGNSMIKKEEKSKKEVPKDTTQIIDVGSSETKNGSVVAYTTNGPKIDLLSGDDFETPNADNSLALVPLGPPQPSSPVAKPDNSIVLIDMLSDNNCESSTPTSNPHANHQKVQQNYSNGFGPGHQEQSYYGQGSSAPV…	N
46340	-4.35558	3	2994832	2994856	3	8.3	90	43	0.438104	GAA	0.333333	0.470588	0.642857	0.4	46340	AT3G09760	AT3G09760.1	RING/U-box superfamily protein; FUNCTIONS IN: zinc ion binding; EXPRESSED IN: 23 plant structures; EXPRESSED DURING: 15 growth stages; CONTAINS InterPro DOMAIN/s: Zinc finger, C3HC4 RING-type (InterPro:IPR018957), Zinc finger, RING-CH-type (InterPro:IPR011016); BEST Arabidopsis thaliana protein match is: RING/U-box superfamily protein (TAIR:AT5G03180.2); Has 1083 Blast hits to 1078 proteins in 12…	N/A		MMDDKARKEEEHHVSHQHNHSPLQRDGNSAEIAQGQELSSPGRDLWRRGLVLDLPSTTPEDTTRDDLFRRNASLTSSPVAKRVNFSPMSSPRVGQRGASLSPSSSTSSSSRNKPNSLKNLIPKLSFKNRNSNNDNVDIEKAADLGFVSSPSSGNGRDRSTWTLTNILTPRLKKTESLPVTPIAHSNPESTHGRFAVDLVTSTKKGPPLPIHRSRSVPAFNKDGSQRQLGVFRVIPTPNMSPTRNTIKLNDANVDGAEDVPEEEAVCRICLVELGEDSEAFKMECLCRGELALAHKECTIKWFTIKGNRTCDVCKQEVQNLPVTLLRMQNSRGSIGAPDAEAAHYSLWQDVPILVIVSMLAYFCFLEQLLLTKMQSGAIAVSLPFSCVLGLFASMTATTM…	S
46357	-4.38022	3	3024925	3024948	3	7.7	90	41	0.31861	TCA	0.333333	0.473684	0.545455	0.388489	46357	AT3G09850	AT3G09850.1	D111/G-patch domain-containing protein; FUNCTIONS IN: nucleic acid binding; INVOLVED IN: biological_process unknown; LOCATED IN: intracellular, chloroplast; EXPRESSED IN: 25 plant structures; EXPRESSED DURING: 14 growth stages; CONTAINS InterPro DOMAIN/s: D111/G-patch (InterPro:IPR000467); BEST Arabidopsis thaliana protein match is: GC-rich sequence DNA-binding factor-like protein with Tuftelin i…	N/A	D/ES	MRGGGRRRSNGGGSSGKNKAKSPGQSTRTNHNSAAGSSSGGRHRRQNNTTLFVEGGILSDYRKDPNFSTPSRGGSSSGKGLRSRSIERVKASASTSGPRKCSGNTYVYQYPSIDFEEGLDRRSGVESDQMNESPLVLGKSEATQIVAFLDQTPSSSKGIKVSYDYEYEPSYVLGDDSHKGLGFCDDSDATPSGSLSIPKALGDQGGSFSHEEEGDAVDESGGNDDELMPDVVKTPKRRNSGFISIGGMKLYTEDVSGEESDGEEEMNDDDDDESGDEGSSGSSELSESDSSEDMFGSYSEIDDDVAKDYLEGIGGSEIMLDAHWLAEQSLDKLDLSSDDSSSSDSSDRKTRKLTGIRLQKASMEYGKKKTTRSGYSGHGKSTNPLAMDDLMFVKDPRSL…	D
46632	-4.53403	3	3476858	3476906	3	16.3	89	63	1.09269	CAT	0.333333	0.428571	0.583333	0.414815	46632	AT3G11100	AT3G11100.1	sequence-specific DNA binding transcription factors; FUNCTIONS IN: sequence-specific DNA binding transcription factor activity; INVOLVED IN: regulation of transcription; LOCATED IN: nucleus; EXPRESSED IN: 24 plant structures; EXPRESSED DURING: 15 growth stages; CONTAINS InterPro DOMAIN/s: MADF domain (InterPro:IPR006578); BEST Arabidopsis thaliana protein match is: sequence-specific DNA binding t…	N/A	D/E	METTPETQSKTHRLPAGREDWWSEDATATLIEAWGDRYVNLNRGNLRQNDWKEVADAVNSSHGNGRPKTDVQCKNRIDTLKKKYKTEKAKPLSNWCFFDRLDFLIGPVMKKSSGAVVKSALMNPNLNPTGSKSTGSSLDDDDDDDDDDEEDDDDAGDWGFVVRKHRKVEDVDSSEGSAFRELARSILKLGEAFERIEGKKQQMMIELEKQRMEVAKELELQRMNMLMEMQLELEKSKLGKRRAASGKKL	D
46915	-4.18122	3	3910755	3910778	3	8.3	90	43	0.438104	AGG	0.666667	0.529412	0.5	0.42963	46915	AT3G12270	AT3G12270.1	protein arginine methyltransferase 3 (PRMT3); FUNCTIONS IN: protein methyltransferase activity, methyltransferase activity, zinc ion binding; INVOLVED IN: protein amino acid methylation; LOCATED IN: intracellular, cytoplasm; EXPRESSED IN: 21 plant structures; EXPRESSED DURING: 13 growth stages; CONTAINS InterPro DOMAIN/s: Zinc finger, C2H2-like (InterPro:IPR015880), Ribosomal L11 methyltransferas…	PRMT3	E/G	MAATMVKHEILNYSEDEEENYSDEGDWGDWKADDNGIEGGEEEEEDDGDDSESDFLCLFCDSHFVSCDLLFEHCRLSHGFDFHGVRKELKLDFYSSFKLINYIRSQVAENMCFSWKIEADDYKDVKFPWDEEKYLKPFWQEDSLLYSFADDEEDEEVTFDREEVMEELQKLGDLSIDVEALGESSMSNSDKCNINGSKDVTSLSNCNGLKQSSADDLIVNGKDAEPKVCDGRLVNRNIRKVNENYFGSYSSFGIHREMLSDKVRTEAYRDALLKNPTLLNGSVVMDVGCGTGILSLFAAKAGASRVVAVEASEKMAKVATKIAKDNKVFNDNEHNGVLEVAHSMVEELDKSIQIQPHSVDVLVSEWMGYCLLYESMLSSVLYARDRWLKPGGAILPDTA…	E
47550	-3.7248	3	4995666	4995687	3	7.3	100	44	0.435838	CTT	0.333333	0.5	0.518519	0.394161	47550	AT3G14850	AT3G14850.2	Encodes a member of the TBL (TRICHOME BIREFRINGENCE-LIKE) gene family containing a plant-specific DUF231 (domain of unknown function) domain. TBL gene family has 46 members, two of which (TBR/AT5G06700 and TBL3/AT5G01360) have been shown to be involved in the synthesis and deposition of secondary wall cellulose, presumably by influencing the esterification state of pectic polymers. A nomenclature…	TBL41	Nterm	MGSKDNAISNDSALVLSLLLLLLLPLLHEAAEGCDMFTGRWVKDDSYPLYNSSTCPFIRHEFSCQRNGRPDLDYSTFRWQPLSCKLARFNGLQFLKKNKGKKIMFVGDSLSLNQWQSLACMLHSSVPNSTYTLTTQGSISTYTFKEYGLELKLDRNVYLVDIVREKIGRVLKLDSINDGKNWVEMDTLIFNTWHWWSRRGPAQPWDLIQIGTNVTKDMDRVAAFEIALGTWGKWVDTVLNTKKTRVFFQGISPSHYKGVLWGEPAAKSCVGQKEPLLGTKYPGGLPAEVGVLKRALGKISKPVTLLDITMLSLLRKDAHPSVYGLGGRNSSGDCSHWCLSGVPDTWNEILYNYMVE	L
50297	-4.30365	3	8952164	8952187	3	8.3	90	43	0.438104	CAT	0.333333	0.529412	0.434783	0.364286	50297	AT3G24535	AT3G24535.1	unknown protein; Has 28 Blast hits to 27 proteins in 8 species: Archae - 0; Bacteria - 0; Metazoa - 0; Fungi - 2; Plants - 26; Viruses - 0; Other Eukaryotes - 0 (source: NCBI BLink).	N/A		MVLRSSISNTRKLFQKTIDNFKSFFFNNGTYHKLPKTPNNTSTNINNDHPNSNIITSSSSSIHKQFQPKPKDYVTTNKASSLQPRIGDRDETLFSQPKVNLVRTKLKEMEKMMNDDIISDEYYVSDVIEFLHCYSRLRYTAYLDVVENFFMEVYSDFFSPHHLVGTRTAVQRRYPAVVGIGSYGGHKH	S
60243	-4.29458	3	16897770	16897794	3	8.3	90	43	0.438104	TCT	0.333333	0.333333	0.653846	0.522059	60243	AT3G45980	AT3G45980.1	Encodes a histone 2B (H2B) protein. This protein can be ubiquitinated in planta, and this modification depends on the HUB1 and HUB2 E3 ubiquitin ligases as well as the UBC1 and UBC2 E2 ubiquitin conjugating enzymes. Lysine 146 appears to be the site of the ubiquitin addition.	H2B	K/M	MAPRAEKKPA EKKPAAEKPV EEKSKAEKAP AEKKPKAGKK LPKEAGAGGD KKKKMKKKSV ETYKIYIFKV LKQVHPDIGI SSKAMGIMNS FINDIFEKLASESSKLARYN KKPTITSREI QTAVRLVLPG ELAKHAVSEG TKAVTKFTSS	K
60270	-4.19399	3	16913892	16913916	3	8.3	90	43	0.438104	TCT	0.333333	0.375	0.413793	0.451852	60270	AT3G46030	AT3G46030.1	HTB11; FUNCTIONS IN: DNA binding; INVOLVED IN: nucleosome assembly; LOCATED IN: nucleus, nucleosome; EXPRESSED IN: 22 plant structures; EXPRESSED DURING: 13 growth stages; CONTAINS InterPro DOMAIN/s: Histone H2B (InterPro:IPR000558), Histone-fold (InterPro:IPR009072), Histone core (InterPro:IPR007125); BEST Arabidopsis thaliana protein match is: Histone superfamily protein (TAIR:AT3G45980.1); Has…	N/A	K/M	MAPRAEKKPA EKKPAAEKPV EEKSKAEKAP AEKKPKAGKK LPKEAGAGGD KKKKMKKKSV ETYKIYIFKV LKQVHPDIGI SSKAMGIMNS FINDIFEKLASESSKLARYN KKPTITSREI QTAVRLVLPG ELAKHAVSEG TKAVTKFTSS	K
60946	-5.21906	3	17559661	17559682	3	7.3	100	44	0.435838	CAA	0.333333	0.5	0.592593	0.445255	60946	AT3G47620	AT3G47620.1	Encodes a transcription factor AtTCP14 that regulates seed germination. AtTCP14 shows elevated expression level just prior to germination. AtTCP14 is predominantly expressed in the vascular tissue of the embryo, and affects gene expression in radicles in a non-cell-autonomous manner.	TCP14	multiple strs	MQKPTSSILNVIMDGGDSVGGGGGDDHHRHLHHHHRPTFPFQLLGKHDPDDNHQQQPSPSSSSSLFSLHQHQQLSQSQPQSQSQKSQPQTTQKELLQTQEESAVVAAKKPPLKRASTKDRHTKVDGRGRRIRMPALCAARVFQLTRELGHKSDGETIEWLLQQAEPSVIAATGTGTIPANFTSLNISLRSSGSSMSLPSHFRSAASTFSPNNIFSPAMLQQQQQQQRGGGVGFHHPHLQGRAPTSSLFPGIDNFTPTTSFLNFHNPTKQEGDQDSEELNSEKKRRIQTTSDLHQQQQQHQHDQIGGYTLQSSNSGSTATAAAAQQIPGNFWMVAAAAAAGGGGGNNNQTGGLMTASIGTGGGGGEPVWTFPSINTAAAALYRSGVSGVPSGAVSSGLHF…	Q
61522	-4.46118	3	18391264	18391286	3	8	90	41	0.379879	TCT	0.333333	0.5625	0.444444	0.40146	61522	AT3G49610	AT3G49610.1	FUNCTIONS IN: DNA binding; INVOLVED IN: regulation of transcription, DNA-dependent; LOCATED IN: cellular_component unknown; CONTAINS InterPro DOMAIN/s: Protein of unknown function DUF313 (InterPro:IPR005508), Transcriptional factor B3 (InterPro:IPR003340); BEST Arabidopsis thaliana protein match is: Domain of unknown function (DUF313) (TAIR:AT5G24050.1); Has 142 Blast hits to 142 proteins in 6 sp…	N/A		MNRNHHDHLDAAGKDMWSRLSDLADKADMLYEREGISKDRKSVSEEEEEKKTRFSILVDLVGRLCDQEERRTLGSSPTKTNTLFEGSEKSHLDHHLDHLPQKPRSSLECFFTRVYTRRNHNNVSTSSSLFNTDEFERTETKSPTIRNSQSSPSSCLMENTKRKRYQSSGKSKKPKFDPFSLTAARETPEWLLDVMRKMKGAEGPIKLIYEKTLTATDVKPSESRLLIPFNKLLRNDFLTPEESRAIAIDKEEEEEDTKKIGVKTIIVNQFSKEWSLRFLIWVMKKKKSGNGTLYYTLNRGWNGVVSGNKLKANDNISLWTFRCGGVLCFALEKE	E
63029	-4.41889	3	20561119	20561142	3	8	100	48	0.573207	TGG	0.666667	0.1875	0.551724	0.496296	63029	AT3G55460	AT3G55460.1	encodes an SC35-like splicing factor that is localized to nuclear specks. Barta et al (2010) have proposed a nomenclature for Serine/Arginine-Rich Protein Splicing Factors (SR proteins): Plant Cell. 2010, 22:2926.	SCL30	2 selected strs, Nterm	MRRYSPPYYSPPRRGYGGRGRSPPPPPPRRGYGGGGGGGGRRGSSHGSLLVRNIPLDCRPEELREPFERFGPVRDVYIPRDYYSGQPRGFAFVEFVDAYDAGEAQRSMNRRSFAGREITVVVASESRKRPEEMRVKTRTRSREPSGSRDRSHGRSRSRSISRSRSPRRPSDSRSRYRSRSYSPAPRRRGGPPRGEEDENYSRRSYSPGYEGAAAAAPDRDRNGDNEIREKPGYEAEDRRRGGRAVSRSPSGSRSRSVEVSPR	G
64679	-4.47219	3	23164512	23164535	3	8	90	41	0.379879	CTT	0.333333	0.5625	0.464286	0.477941	64679	AT3G62630	AT3G62630.1	Protein of unknown function (DUF1645); CONTAINS InterPro DOMAIN/s: Protein of unknown function DUF1645 (InterPro:IPR012442); BEST Arabidopsis thaliana protein match is: Protein of unknown function (DUF1645) (TAIR:AT2G15760.1); Has 309 Blast hits to 289 proteins in 68 species: Archae - 3; Bacteria - 16; Metazoa - 56; Fungi - 10; Plants - 169; Viruses - 0; Other Eukaryotes - 55 (source: NCBI BLink).	N/A	S/R	MDLVESFSHGDPDTPRFSDDFGSGSACSTPFVSAPSSPGRGPPPGYFFSAPSSPMHFFLCSASSSSENPKKLDTSSCGDFEFDFSSRLSSSSGPLGGVSMTSAEELFSNGQIKPMKLSSHLQRPQILSPLLDLENEEEDDDDETKPNGEMKRGRDLKLRSRSVHRKARSLSPLRNAAYQWNQEEGEEEEVAGEREVKECIRKLQEDENVPSAETTPSCSASSSRSSSYGRNSKKWIFLKDLLHRSKSEGRGNGKEKFWSNISFSPSNFKDKKLKSSQLEEKPIQETVDAAVESKKQKQKQPPAKKAPVNGKPTNGIAKRRGLQPSAHELHYTTNRAQAEEMKKRTYLPYRHGLFGCLGFSSKGYSALNGLARSLNPVSSG	S
66130	-5.18247	4	1417495	1417520	3	8.3	91	45	0.457624	GAA	0.333333	0.333333	0.47619	0.325926	66130	AT4G03220	AT4G03220.1	Protein with RNI-like/FBD-like domains; CONTAINS InterPro DOMAIN/s: F-box domain, cyclin-like (InterPro:IPR001810), FBD (InterPro:IPR013596), F-box domain, Skp2-like (InterPro:IPR022364), FBD-like (InterPro:IPR006566); BEST Arabidopsis thaliana protein match is: F-box/RNI-like superfamily protein (TAIR:AT3G59210.4); Has 1478 Blast hits to 1464 proteins in 18 species: Archae - 0; Bacteria - 0; Met…	N/A	K/E, Nterm	METRSVKRKKKKKEEEANWFIRVDRISNLPDSLNHQILLLLPLKSAAQASLLSKRWRSLFLSLPDLDFTSINDLKNPKSFSSNSIYKVLSLRSHRDSNNLRSLRFRVPVTFTSLNSLIRLAVTHQVQDLDIEVTTKDYFNFPRWIVTSQNLRALTLKSANLGFRLPPSSSARGGFQKLTSLSLSRVILHNQPCLSDFFTDPSFPLLEKLTLECCFGLKELKVSCRLLQEFSLKNSLQLEGLEVSGNKLQKLKVESCFYSYSEKSFVKINTPNLKTFLWNSNAVTTSVHFLDKLVCLRKAFVKVFWHHQDLNSQIQSLFTLLSGLCHSYKLQLGNQSVEILSSKKGLLKNHLLPFHNMRFLELQTRLNRHNVQTLSCLFKSCPMLNILTVKIIDDQTSER…	K
73208	-4.07386	4	6567477	6567501	3	8.3	90	43	0.438104	AGG	0.666667	0.352941	0.5	0.496296	73208	AT4G10630	AT4G10630.1	Glutaredoxin family protein; FUNCTIONS IN: electron carrier activity, protein disulfide oxidoreductase activity; INVOLVED IN: N-terminal protein myristoylation, cell redox homeostasis; LOCATED IN: cellular_component unknown; CONTAINS InterPro DOMAIN/s: Thioredoxin fold (InterPro:IPR012335), Glutaredoxin (InterPro:IPR002109), Thioredoxin-like fold (InterPro:IPR012336); BEST Arabidopsis thaliana pr…	N/A		MGCVSSNLLNHDEDFSQIGGGSSAFGHHIVKLTSTTYGLLTLDPPPPPSPPMTPPEKFTVDTKSKSIWSEPRVIKSEPEIINSWELMSGLDGESFRFTPLPKTPVKYKVFGGENKENSDPSRRNPRKNLNDEVLKPLDLNREDSDSNSRSPRKSFKPLDLKLDEKFERICPPGGENRVVMYTTSLRGVRQTFEACNAVRAAVESFGVVVCERDVSMDRRFREELVSLMAKRVGDEGVAALPPRVFVKGRYIGGGEEVLRLVEEGSFGELISGIPRKKAGGCESGACDGCGGLFFLPCFRCNGSCKMVKGWGSASVVVRCNECNENGLVPCPICS	P
76363	-3.50006	4	10231523	10231548	3	8.7	91	45	0.530293	CCT	0.666667	0.521739	0.545455	0.437037		AT4G18570			N/A	big interrupted P	MVAGKVRVTMGFHKSPSTKKTKDMPSPLPLPPPPPPPLKPPSSGSATTKPPINPSKPGFTRSFGVYFPRASAQVHATAAAASHNGVVSELRRQVEELREREALLKTENLEVKLLRESVSVIPLLESQIADKNGEIDELRKETARLAEDNERLRREFDRSEEMRRECETREKEMEAEIVELRKLVSSESDDHALSVSQRFQGLMDVSAKSNLIRSLKRVGSLRNLPEPITNQENTNKSISSSGDADGDIYRKDEIESYSRSSNSEELTESSSLSTVRSRVPRVPKPPPKRSISLGDSTENRADPPPQKSIPPPPPPPPPPLLQQPPPPPSVSKAPPPPPPPPPPKSLSIASAKVRRVPEVVEFYHSLMRRDSTNSRRDSTGGGNAAAEAILANSNARDMI…	P
78037	-3.64751	4	12486568	12486593	3	8.7	100	52	0.692832	GAC	0.666667	0.3125	0.655172	0.496296	78037	AT4G24030	AT4G24030.1	unknown protein; FUNCTIONS IN: molecular_function unknown; INVOLVED IN: biological_process unknown; LOCATED IN: endomembrane system; Has 4 Blast hits to 4 proteins in 2 species: Archae - 0; Bacteria - 0; Metazoa - 0; Fungi - 0; Plants - 4; Viruses - 0; Other Eukaryotes - 0 (source: NCBI BLink).	N/A	Nterm	MRSGGESERTVMGFVVVVVVVVMRGGEIDAGAAFEGGEESGYYGCADPASGVVDLFHGSRRANVGGDADAFVHGFWIRLAFQKTTKKRRSWDGSIYYRNNDFEPRKCKYKYIKRLLFVRNSASGVVVS	V
78651	-3.68093	4	13528800	13528819	3	6.7	100	40	0.303382	ACA	0.333333	0.444444	0.538462	0.470588	78651	AT4G26930	AT4G26930.1	Encodes a putative transcription factor (MYB97).	N/A		MIVYGGGASEDGEGGGVVLKKGPWTVAEDETLAAYVREYGEGNWNSVQKKTWLARCGKSCRLRWANHLRPNLRKGSFTPEEERLIIQLHSQLGNKWARMAAQLPGRTDNEIKNYWNTRLKRFQRQGLPLYPPEYSQNNHQQQMYPQQPSSPLPSQTPASSFTFPLLQPPSLCPKRCYNTAFSPKASYISSPTNFLVSSPTFLHTHSSLSSYQSTNPVYSMKHELSSNQIPYSASLGVYQVSKFSDNGDCNQNLNTGLHTNTCQLLEDLMEEAEALADSFRAPKRRQIMAALEDNNNNNNFFSGGFGHRVSSNSLCSLQGLTPKEDESLQMNTMQDEDITKLLDWGSESEEISNGQSSVITTENNLVLDDHQFAFLFPVDDDTNNLPGIC	N
78939	-3.81339	4	14074255	14074280	3	8.7	91	45	0.530293	CAT	0.333333	0.6875	0.482759	0.518519		AT4G28480			N/A	multiple strs	MGVDYYKVLQVDRSANDDDLKKAYRKLAMKWHPDKNPNNKKDAEAKFKQISEAYDVLSDPQKRAVYDQYGEEGLKGNVPPPNAATSGASYFSTGDGSSSFRFNPRSADDIFAEFFGFSTPFGGGGGGTGGQRFASRMFGDDMYASFGEGAGGGGAMHHHHHHHHHAAARKVAPIENKLPCSLEDLYKGTTKKMKISREIVDVSGKAMQVEEILTIGVKPGWKKGTKITFPEKGNEHPGVIPADLVFIIDEKPHPVFTREGNDLIVTQKVSLADALTGYTANIATLDGRTLTIPITNVIHPEYEEVVPKEGMPLQKDQTKKGNLRIKFNIKFPARLTAEQKAGFKKLIG	H
78980	-5.26788	4	14142455	14142482	3	9.3	92	42	0.646654	TTC	0.333333	0.5	0.52	0.437037	78980	AT4G28640	AT4G28640.2	Auxin induced gene, IAA11 (IAA11).	IAA11		MEGGSASGSASALSNDENLVVSCEDSSSPIGNELELGLTLSLGRKGYRDCRVYADDSSSSSSSSSLSRASVIAGIKRTADSMAATSGQVVGWPPIRTYRMNSMVNQAKASATEDPNLEISQAVNKNRSDSTKMRNSMFVKVTMDGIPIGRKIDLNAHKCYESLSNTLEEMFLKPKLGSRTLETDGHMETPVKILPDGSSGLVLTYEDKEGDWMLVGDVPWGMFIGSVRRLRIMKTSEATGKAQMIL	S
79202	-4.3787	4	14388257	14388280	3	8	90	41	0.379879	ATC	0.333333	0.3125	0.448276	0.348148	79202	AT4G29180	AT4G29180.2	root hair specific 16 (RHS16); FUNCTIONS IN: kinase activity; INVOLVED IN: protein amino acid phosphorylation; LOCATED IN: endomembrane system; EXPRESSED IN: root hair; CONTAINS InterPro DOMAIN/s: Protein kinase, ATP binding site (InterPro:IPR017441), Protein kinase, catalytic domain (InterPro:IPR000719), Leucine-rich repeat (InterPro:IPR001611), Serine-threonine/tyrosine-protein kinase (InterPro…	N/A		MGAHSVFLILFSVIAIAIVVHGQGQAGFISIDCGSPPNINYVDTDTGISYTWDAPFINAGVNLNVSEEYGYPKNPVLPFPLADVRSFPQGNRNCYTLTPSDGKGNLYLIRASFMYGNYDGKNALPEFDLYVNVNFWTSVKLRNASENVIKEILSFAESDTIYVCLVNKGKGTPFISALELRPMNSSIYGTEFGRNVSLVLYQRWDTGYLNGTGRYQKDTYDRIWSPYSPVSWNTTMTTGYIDIFQSGYRPPDEVIKTAASPKSDDEPLELSWTSSDPDTRFYAYLYFAELENLKRNESREIKIFWNGSPVSGAFNPSPEYSMTVSNSRAFTGKDHWISVQKTAESTRPPILNAIEIFSAQSLDEFYTRIDDVQAIESIKSTYKVNKIWTGDPCSPRLFP…	S
80396	-3.44011	4	16441948	16441968	3	7	100	42	0.37134	TCA	0.333333	0.470588	0.48	0.434783	80396	AT4G34390	AT4G34390.1	extra-large GTP-binding protein 2 (XLG2); FUNCTIONS IN: guanyl nucleotide binding, signal transducer activity; INVOLVED IN: in 7 processes; LOCATED IN: nucleus; EXPRESSED IN: 28 plant structures; EXPRESSED DURING: 13 growth stages; CONTAINS InterPro DOMAIN/s: Guanine nucleotide binding protein (G-protein), alpha subunit (InterPro:IPR001019), G protein alpha subunit, helical insertion (InterPro:IP…	XLG2		MAAVIRKLLPFPSPNPKRDNRESDDDDETSSGYRIEYSFASEYKGPLIANVPRALPVEVDQIPTALPVSFSSLRSGISYPVAPLVMTKDTKRPPDSGIEKKNGFVDSAAGSSVVLIGRDVVSGSSSSSSSKRLDVPEEVKSPADFRLSPSSPLSASAREEDHLDDDRVSDVGPRAVRFVEPFQSSECDESSYVSDGESIAATHRAERKGKRGSCYRCQLGNRFTEKEVCIVCDAKYCFNCVRRAMGAMPEGRKCQACIGYRIDESKRASLGKCSRMLKRHLTDSELRQVMNAEITCKANQLPSRLIIVNDKPLSEDELYTLQTCPNPPKKLKPGHYWYDKVAGYWGKIGEKPSQIISPNNSIGGYISEKVSNGDTEIYINGREITKPELTMLKWAGVQC…	S
80842	-5.16801	4	17145850	17145896	3	15.7	90	52	1.093	GGA	0.666667	0.391304	0.636364	0.459259		AT4G36230			N/A	protein mostly Gs	MESVRESSLSSLMLFLFGLAYVVFLLNSNCVNGLRDLKERDASESNFVNATSSSVLDSKSTANISTVEFENALDDQNVNKTEKCESRAGGGGGGGGGGGGGGGGQGSGGGGGEGNGGNGKDNSHKRNKSSGGGGGGGGGGGGGSGNGSGRGRGGGGGGGGGGGGGGGGGGGGGGGGGGGGGSDGKGGGWGFGFGWGGDGPGGNFGRCWYPGCTKKSTESHN	G
81565	-4.47065	4	18179046	18179071	3	8.7	91	45	0.530293	GAA	0.333333	0.529412	0.64	0.463768	81565	AT4G39010	AT4G39010.1	glycosyl hydrolase 9B18 (GH9B18); FUNCTIONS IN: hydrolase activity, hydrolyzing O-glycosyl compounds, catalytic activity; INVOLVED IN: carbohydrate metabolic process; LOCATED IN: endomembrane system; EXPRESSED IN: 16 plant structures; EXPRESSED DURING: 8 growth stages; CONTAINS InterPro DOMAIN/s: Six-hairpin glycosidase (InterPro:IPR012341), Glycoside hydrolase, family 9, active site (InterPro:IP…	N/A	Nterm	MKLHLHPLSLVFFFFFFFFRPTMSSNQHDYSDALSKSILFFEGQRSGYLPNDQRMTWRRNSGLSDGWTHNIDLTGGYYDAGDNVKFNFPMAFTTTMLAWSVIEFGEFMPSSELRNSLVALRWSSNYLLKSVSQLPNRIFVQVGDPIADHNCWERPEDMDTPRTAYAVNAPNPASEVAGETTAALSAASIAFRSSDPGYSQTLLQNAVKTFQFADMYRGAYSSNDDIKNDVCPFYCDFNGFQDELLWGAAWLRKATGDESYLNYIESNREPFGANDNVDEFGWDNKVGGLNVLVSKEVIEGNMYNLEAYKASAESFMCSLVPESSGPHVEYTSAGLLYKPGGSQLQHATTISFLLLVYAQYLSRSSLSLNCGTLTVPPDYLRRLAKKQVDYILGNNPMGL…	F
82058	-3.55984	5	375746	375771	3	8.7	91	45	0.530293	AGG	0.666667	0.5625	0.551724	0.488889		AT5G01980				R/M	MESQGPSNGHPMDISSNSIPSSACNLCGRVVQSASDDLEIFSLCVDCKFLLLEDFGTPAPPLARRQTIRRRRMRRRRRTTRHDSSESVGVGDLSSQQFTHLISIARQSLSTVQASEDLRDDLRTSSHTTPSGSTRWRLFSESESDDFDNFGETESNASFSLYRFPHADNDTISFSAYGGESDASTDRHADIFVQPDDRSDIDFDTDIDPMRAGLNQWNSDEEDREWEEGAGPSGVAGTRYRNYLASPSESYSSMTRFDSPELERSFRQRIIERRHSLSRNIFTGLEDLDFSPYAANVGDYLDERGFDELLEQLAESDNSRRGAPPASVSCVRNLPRVIIAEEHVMKGLVCAICKELFSLRNETTQLPCLHLYHAHCIVPWLSARNSCPLCRYELPTDDK…	R
83142	-4.31208	5	2069424	2069447	3	8	90	41	0.379879	TCC	0.666667	0.294118	0.607143	0.407407	83142	AT5G06710	AT5G06710.1	Homeobox-leucine zipper protein.	HAT14		MELALSLGDNTKKQFSFMEKNSKINNPSVSSTSTSEKDLGFCMALDVAFGGHRSLSSSSSPSVEDEKKKPAPRAKKSDEFRVSSSVDPPLQLQLHFPNWLPENSKGRQGGRMPLGAATVVEEEEEEEEAVPSMSVSPPDSVTSSFQLDFGIKSYGYERRSNKRDIDDEVERSASRASNEDNDDENGSTRKKLRLSKDQSAFLEDSFKEHSTLNPKQKIALAKQLNLRPRQVEVWFQNRRARTKLKQTEVDCEYLKRCCESLTEENRRLQKEVKELRTLKTSTPFYMQLPATTLTMCPSCERVATSAAQPSTSAAHNLCLSTSSLIPVKPRPAKQVS	E
83692	-3.52063	5	2786720	2786755	3	12	100	72	1.04471	GAT	0.333333	0.470588	0.428571	0.325926	83692	AT5G08600	AT5G08600.2	U3 ribonucleoprotein (Utp) family protein; FUNCTIONS IN: molecular_function unknown; INVOLVED IN: rRNA processing; LOCATED IN: small-subunit processome; EXPRESSED IN: 17 plant structures; EXPRESSED DURING: 9 growth stages; CONTAINS InterPro DOMAIN/s: Small-subunit processome, Utp14 (InterPro:IPR006709); BEST Arabidopsis thaliana protein match is: U3 ribonucleoprotein (Utp) family protein (TAIR:AT…	N/A		MGGGEKRKSSFKNLANAKKRRTGPHLPSSILKTIANEKRPLNSDEGDDEIDSAYGDFYEYEEGVPEEESRKNNRYERVVNYEFELAEDCEDENVESEDDDDDDDDDDDDRHSRMLKNVTELPISAFQGESKNKRVVFTEPYPESEFNPTRDVLEGKSLTTIDDFMEPLQGLHGNSQLSNMISRMRKDTQSLVHAPLPKPEQERLERDVANELVYKGFDIWVPLVKRNREAPTIYFNQDVNVGYSTVGAIASQFHPRTEFEMKMASLLDDHEILEAHKEDGARLLEFNEVSMEDHIKRRNHVAKMRSMLFRVDLKHKRIKQIKSKTYHRLKNKDLNQSGVGAFMEPAMAKEEAKKQEARRVKERMTLKHKNTGQWAKRMLSRGLNRKYDVTQAALSKQLQ…	D
84271	-3.80825	5	3733848	3733874	3	9	91	47	0.581349	ATC	0.333333	0.4375	0.482759	0.355556	84271	AT5G11600	AT5G11600.1	unknown protein; FUNCTIONS IN: molecular_function unknown; INVOLVED IN: biological_process unknown; LOCATED IN: chloroplast; EXPRESSED IN: 20 plant structures; EXPRESSED DURING: 11 growth stages; BEST Arabidopsis thaliana protein match is: unknown protein (TAIR:AT1G19990.1); Has 1807 Blast hits to 1807 proteins in 277 species: Archae - 0; Bacteria - 0; Metazoa - 736; Fungi - 347; Plants - 385; Vi…	N/A	Cterm	MATQERPSSAKSEPRDASSSLSSRVKIDPSIKDKKKIATSSRPIMSDSKPRSSVSTVTAKSEAKPKVPINSVKTIATTSAAASLVKGKAQTTSTVVSLVKAKTTSATVSLVKGKAKREKKVYSLAGQKFDPPEEREPLRIFYESLSKQIPGSEMAEFWLMEHGMLSPEKAKRAFEKKQRKMKQIRMGTPSKSAPTFSSKAESSQRTSASKNNGLDARKKKKVVDDDDDDDDDFILSHKRRKV	D
86644	-6.60009	5	7315451	7315488	3	12.7	91	41	0.99459	TCT	0.333333	0.473684	0.5	0.488889	86644	AT5G22090	AT5G22090.1	Protein of unknown function (DUF3049); FUNCTIONS IN: molecular_function unknown; INVOLVED IN: biological_process unknown; LOCATED IN: chloroplast; CONTAINS InterPro DOMAIN/s: Protein of unknown function DUF3049 (InterPro:IPR021410); BEST Arabidopsis thaliana protein match is: Protein of unknown function (DUF3049) (TAIR:AT4G02810.1); Has 1373 Blast hits to 1137 proteins in 167 species: Archae - 0;…	N/A	E/A	MMACGLSKSLGLSSSLKKQQGIVSILGGISSNTSSAPSLRRTFSADLSSKTWVSQNGFSPMKRISSSEKLRPDEEEAEEESRSGVDIWAQIQQDKNDKKKEEEIEPGQSDVWSSILSEKKKTESSKDTVPPPYVHPLMKRASSLSEKSLEICTESLGSETGCDGFSSHASSETGDAEIEIHDETNLVVNVTETKVEEITETEIVVEQESSIIVPNHIIELPPGSFPPPIRSLSSQSGSSLHMKTRRDNGRLVLEAVSMPSHNNFSAKRQDGRLLLTFAEISNEPNYDKEDEIDSEVQWFDEEEEEEEEEEDEEEEAPDEFAYKPNGLLYKMAQKPIPITVHRLAHKPIGVPKRNSRWPMADEFDTKSDLSTPVVHSLPPRPRVAQLARSTKPPSTVDDT…	E
89091	-3.97773	5	9785821	9785842	3	7.3	100	44	0.435838	AAG	0.333333	0.5625	0.37931	0.37037	89091	AT5G27650	AT5G27650.1	Tudor/PWWP/MBT superfamily protein; CONTAINS InterPro DOMAIN/s: PWWP (InterPro:IPR000313); BEST Arabidopsis thaliana protein match is: Tudor/PWWP/MBT superfamily protein (TAIR:AT3G05430.1); Has 6717 Blast hits to 4764 proteins in 372 species: Archae - 18; Bacteria - 431; Metazoa - 2974; Fungi - 702; Plants - 445; Viruses - 136; Other Eukaryotes - 2011 (source: NCBI BLink).	N/A	multiple strs	MYKTKLIPVMNEDAVIVQQTDSIQDPKVTPDDTVVDSSGDVHEAIDDDVEASSPMELDSAVTNDARVLESERSEKDGVVGSEEEDEIKSEDVLIDKDDESSEVKEEEEEEDGSDDQSSELGSEADEKELDLGLKEEKKGVSDYKSLLSEFDDYVASEKMGSGVSRALSYGFEVGDLVWGKVKSHPWWPGHIFNEAFASPSVRRMRRIDHVLVAFFGDSSYGWFDPAELIPFEPNLEEKSQQTVSKHFVRAVEEAKDEASRRSALGLTCKCRNPYNFRPSNVEDYFAVDVPDYELQAVYSVDQIKNSRDKFLPAETISFVKQLALAPQECDPDSLKFMKKKAVVFAFRKSVFEEFDETYAQAFGTKSPRSSVSTLEPHNRAPPRAPLSGPLVIAETLGDL…	E
96827	-4.39591	5	15905155	15905178	3	8	90	41	0.379879	TGA	0.333333	0.45	0.4	0.340741	96827	AT5G39740	AT5G39740.1	Encodes a ribosomal protein RPL5B that is involved in ribosome biogenesis and plays a role in organ size control by promoting cell proliferation and preventing compensation in normal leaf development.	RPL5B	D/E, Cterm	MVFVKSSKSNAYFKRYQVKFRRRRDGKTDYRARIRLINQDKNKYNTPKYRFVVRFTNKDIVAQIVSASIAGDIVKASAYAHELPQYGLTVGLTNYAAAYCTGLLLARRVLKMLEMDDEYEGNVEATGEDFSVEPTDSRRPFRALLDVGLIRTTTGNRVFGALKGALDGGLDIPHSDKRFAGFHKENKQLDAEIHRNYIYGGHVSNYMKLLGEDEPEKLQTHFSAYIKKGVEAESIEEMYKKVHAAIRAEPNHKKTEKSAPKEHKRYNLKKLTYEERKNKLIERVKALNGAGGDDDDEDDEE	D
97476	-3.89405	5	16580921	16580940	3	6.7	100	40	0.303382	GAT	0.333333	0.444444	0.521739	0.395683	97476	AT5G41410	AT5G41410.1	Homeodomain protein required for ovule identity.Loss of function mutations show homeotic conversion of integuments to carpels.Forms heterodimers with STM and KNAT1. Interacts with AG-SEP heterodimers is thought to restrict WUS expression. BEL interacts with MADS box dimers composed of SEP1(or SEP3) and AG, SHP1, SHP2 and STK. The interaction of BEL1 with AG-SEP3 is required for proper integument …	BEL1	weird protein, many short strs	MARDQFYGHNNHHHQEQQHQMINQIQGFDETNQNPTDHHHYNHQIFGSNSNMGMMIDFSKQQQIRMTSGSDHHHHHHQTSGGTDQNQLLEDSSSAMRLCNVNNDFPSEVNDERPPQRPSQGLSLSLSSSNPTSISLQSFELRPQQQQQQGYSGNKSTQHQNLQHTQMMMMMMNSHHQNNNNNNHQHHNHHQFQIGSSKYLSPAQELLSEFCSLGVKESDEEVMMMKHKKKQKGKQQEEWDTSHHSNNDQHDQSATTSSKKHVPPLHSLEFMELQKRKAKLLSMLEELKRRYGHYREQMRVAAAAFEAAVGLGGAEIYTALASRAMSRHFRCLKDGLVGQIQATSQALGEREEDNRAVSIAARGETPRLRLLDQALRQQKSYRQMTLVDAHPWRPQRGLP…	M
99419	-5.03257	5	18723569	18723589	2	10.5	100	42	0.908802	GA	0.5	0.470588	0.48	0.347826		AT5G46190			N/A	dinuc!!	MVERGKRTHNRFRDNNNDNNRNQRRRLSYESEEKKIDNKDDLVVVYRILCPSGVMGSVIGKSGKVINLIRQETRARIKVVDPFPGCSERVITIFCSVSEKKDIVDIEYSELDYSVPLCSAQAALLKVHDAIVASLATAAENTKIDRDDFRECRLLVPSSQCSIVIGKSGSIIKNIRGRTRANVKVVSKDVSDPSHTCAMDFDNIVMISGETESVKKALFAVSAIMYKVSPREQIPLDTTVQEVPASIIIPSDLSIYPQAGLYPSQDSIFQHGANVSSFIGTLPQGYGENAANPVPVFSASALPVVHGFGGSSRSEKLAIKVICSSSKIGRVIGKGGLTIKGIRQASGSHIEVNDSRTNHDDDCVITVTATESPDDLKSMAVEAVLLLQEKINDEDEDKV…	ER
99634	-4.48573	5	19016838	19016860	3	8	90	41	0.379879	GAA	0.333333	0.611111	0.407407	0.4	99634	AT5G46870	AT5G46870.1	RNA-binding (RRM/RBD/RNP motifs) family protein; FUNCTIONS IN: oxidoreductase activity, nucleotide binding, nucleic acid binding; INVOLVED IN: oxidation reduction; EXPRESSED IN: cultured cell; CONTAINS InterPro DOMAIN/s: Aldo/keto reductase (InterPro:IPR001395), RNA recognition motif, RNP-1 (InterPro:IPR000504), Nucleotide-binding, alpha-beta plait (InterPro:IPR012677); BEST Arabidopsis thaliana …	N/A	E/K	MSMVTVKVSNVSLEATERDLKEFFSFSGDIAYLETQSENDGSKLAYVTFKDLQGAETAVLLTGSTIVDSSVTVTMSPDYQLPPDALASIESLKESNKSSSPTREDVSVFRKAEDVVSGMISKGFVLGKDAIAKAKSLDEKHQLTSTASARVTSFDKRIGFTEKINTGTTVVSEKVKEVDQKFQVTEKTKSAIAAAEQTVSNAGSAIMKNRYVLTGATWVTGAFNRVSKAAEEVGQKAKEKVGLAEEEEEEKKKVVDEVAIVHLTESPKALDQSEQDSKLPESKSQPHKELNASVV	E
100094	-4.58149	5	19596364	19596389	3	8.7	91	45	0.530293	GAA	0.333333	0.625	0.576923	0.449275	100094	AT5G48360	AT5G48360.1	Actin-binding FH2 (formin homology 2) family protein; FUNCTIONS IN: actin binding; INVOLVED IN: cellular component organization, actin cytoskeleton organization; EXPRESSED IN: 18 plant structures; EXPRESSED DURING: 9 growth stages; CONTAINS InterPro DOMAIN/s: Actin-binding FH2/DRF autoregulatory (InterPro:IPR003104), Actin-binding FH2 (InterPro:IPR015425); BEST Arabidopsis thaliana protein match …	FH9	E/D, multiple strs	MQNFWFAIFFFLLTCAPPSPLSYASTVTLSRRLLYDYESPLPLPLSPISPPFFPLESSPPSPPPPLPPTPPTTFAVFPTFPANISALVLPRSSKPHHTSPTLLLPALSAVLVIATVIGLALFLYGRHRGQTRHLKNSHCSSSNTSSYGDEQSHITTNFNMAATTSPSEVFYLNTEESDHIRTGGTFFLKQDSPEIRPLPPLPPRSFHHNNYETEVNEEDEEEEEDVFFSPMASLPGSANSSPSHSCSSSCSGWVSPARSFSITMSPPNPRYSDATNLQSPSPERLRVRKNYNGNGSSSLRMFSFWNQNMGFGFPRISSASTSPDRGFIRTPLSSLYSSVSTSPDGLFRKFLDSSPPIWNDFSRNVKSVLLSHTASSRRDFVINIGESSSQQSKVPALPP…	E
100102	-5.32226	5	19611477	19611504	3	9.3	92	49	0.646654	ACA	0.333333	0.555556	0.5	0.478261	100102	AT5G48385	AT5G48385.1	FRIGIDA-like protein; CONTAINS InterPro DOMAIN/s: Frigida-like (InterPro:IPR012474); BEST Arabidopsis thaliana protein match is: FRIGIDA-like protein (TAIR:AT4G14900.1); Has 1269 Blast hits to 1187 proteins in 101 species: Archae - 0; Bacteria - 22; Metazoa - 72; Fungi - 9; Plants - 1133; Viruses - 0; Other Eukaryotes - 33 (source: NCBI BLink).	FRL3	N/I, multiple strs	MEDTRSVASLMDSTSSKIQQLQKAFAELESQRAVTLNLKWKELEEHFHGLERSLKRRFHELEDQEKEYETKTRKAQELLEKKKAAVEAKEKAALERLQKKRDAAMFTINSALDKYNNAPVSKPSVGERWPQNAVEDSSNVFAADSITDDNPDGIVQDVQISPVMGNYEVKAYPQLLKLCGDMDSTGLHKFVSDNRKNLASLKEEIPMAFRAAANPASLVLDSLEGFYPMEAPTADGKKDANLLGMRRTCIMLMECLSILLSGLDRNCLAVVLSQNVKHRAKTIAEGWNPLLESLDMDACNGNSLEAHAFLQLLATFAIVADFKEDELLKLIPMVSRRRQAAELCRSLGLAEKMPGVIEVLVNSGKQIDAVNLAFAFELTEQFSPVSLLKSYLIEARRSS…	N
100984	-4.40838	5	20736417	20736440	3	8	90	41	0.379879	AAG	0.333333	0.470588	0.444444	0.397059	100984	AT5G50970	AT5G50970.1	transducin family protein / WD-40 repeat family protein; CONTAINS InterPro DOMAIN/s: WD40 repeat-like-containing domain (InterPro:IPR011046), WD40 repeat 2 (InterPro:IPR019782), WD40-repeat-containing domain (InterPro:IPR017986), WD40 repeat (InterPro:IPR001680), WD40/YVTN repeat-like-containing domain (InterPro:IPR015943), WD40 repeat, subgroup (InterPro:IPR019781); BEST Arabidopsis thaliana pro…	N/A	E/D, Nterm	MSELCTNPKKPKLKEEDEEEEANVSCREEQEEVLVALVEHRSNEIERLNNHISNYQTKLIEAERSLQNSKAKLAQLRGVAVPSISGAKKDHKPLKTLRNVNVSEDYASPSPSKTLRPSDSSDHPRSSCGSSVSKAKTVVVKQKSETSRDSPNVKDRGIKRKFEQKEHKELIRLIARNSSPTTIKCHTSNQISSQHKRKLRSLILCPVNEQLFATSSLDGMVSLWQLQPGRLVASLLSTTDCLSRKQRRWAEDMAWHPSGNTLFSVYTADDGDSQISILNLNKTREVTFLENKPHVKGIINNIKFMPWENTCFVTGGSDHAVVLWNESDDEENKWKSKPLHRNLHSAAVMGVDGMKNKNVILSVGADKRIYGFDVQVGRADYKHQIDYKCMSVLANPCDF…	E
102220	-3.71031	5	22545722	22545749	3	9.3	92	49	0.646654	GTT	0.333333	0.625	0.576923	0.463768		AT5G55670			N/A	low complexity	MDEGDGRDQMDQFHQNEAISAVADDGFMAEEEDDDYEDLYNDVNVGEGFLQSMKKNDEAGSRNEEKEKVNMEEEDRVEPVLGEAEVSISIPGLVGESVEKEAEAESGGGGSGSGTDVVVASSGYGAQEVKVSDVSQEIPGGIGTGTGGGLRVELGQASNRANDLEAPRGNNISQGLLPPPPVLGNNENLMRPVMGNVNGGIPPGPGSNMVGNGANIAMPGVVGGGTGGGGGGGAFLFVGDLHWWTTDAELEAELCKYGAVKEVKFFDEKASGKSKGYCQVEFYDPVAASACKDALNGYPFNGRPCVVEYASPYSVKRMGEAQVNRTQQAQSVIAQAKRGGPADPPSKPLVANNNNNNNNNAIGGNFQGGENRGFGRGNWGRGNAQGMGGRGPGGPMRNR…	N
104934	-3.53437	5	26671785	26671818	3	11.7	90	49	0.904176	TCT	0.333333	0.375	0.535714	0.433824	104934	AT5G66800	AT5G66800.1	unknown protein; BEST Arabidopsis thaliana protein match is: unknown protein (TAIR:AT3G50640.1); Has 1807 Blast hits to 1807 proteins in 277 species: Archae - 0; Bacteria - 0; Metazoa - 736; Fungi - 347; Plants - 385; Viruses - 0; Other Eukaryotes - 339 (source: NCBI BLink).	N/A		MACLEMYNSNGGGGTPMSPRISFSNDFVEIRPETTKTTRSSPLSKQEGSSSSFSDNFEFSVSNYTMMPADELFSKGKLLPFKETNQVQRTLREELLVEEDEEEGPRDATNIFSLKPPIFSSSSSSSSSSKGRWKGLLGLKRAHVGSKNNEERFVHHMINNNKQSQEAIGGREGSSCREMKKSM	S
																				terminal:	14
																			AA	count	freq
																			K	5	0.0819672
																			D	10	0.163934
																			E	17	0.278689
																			G	4	0.0655738
																			H	2	0.0327869
																			S	8	0.131148
																			Q	1	0.0163934
																			N	5	0.0819672
																			T	1	0.0163934
																			P	2	0.0327869
																			M	1	0.0163934
																			V	1	0.0163934
																			F	1	0.0163934
																			R	1	0.0163934
																			L	1	0.0163934
																			total	61	0.967213

## Sheet: coding_purifying_122016
ID	codzscores[codzscores < (stab_thresh)]	Chromosome	TAIR10start	TAIR10end	Unit.Size	X..of.Units	Purity	TRF.score	VARscore	Consensus	GC_content	ta_gc	la_gc	scan_gc	str	gene	Representative Gene Model Name	Gene Description	Primary Gene Symbol	note	seq	unit
86644	-6.36052	5	7315451	7315488	3	12.7	91	41	0.99459	TCT	0.333333	0.473684	0.5	0.488889	86644	AT5G22090	AT5G22090.1	Protein of unknown function (DUF3049); FUNCTIONS IN: molecular_function unknown; INVOLVED IN: biological_process unknown; LOCATED IN: chloroplast; CONTAINS InterPro DOMAIN/s: Protein of unknown function DUF3049 (InterPro:IPR021410); BEST Arabidopsis thaliana protein match is: Protein of unknown function (DUF3049) (TAIR:AT4G02810.1); Has 1373 Blast hits to 1137 proteins in 167 species: Archae - 0;…	N/A	E/A	MMACGLSKSLGLSSSLKKQQGIVSILGGISSNTSSAPSLRRTFSADLSSKTWVSQNGFSPMKRISSSEKLRPDEEEAEEESRSGVDIWAQIQQDKNDKKKEEEIEPGQSDVWSSILSEKKKTESSKDTVPPPYVHPLMKRASSLSEKSLEICTESLGSETGCDGFSSHASSETGDAEIEIHDETNLVVNVTETKVEEITETEIVVEQESSIIVPNHIIELPPGSFPPPIRSLSSQSGSSLHMKTRRDNGRLVLEAVSMPSHNNFSAKRQDGRLLLTFAEISNEPNYDKEDEIDSEVQWFDEEEEEEEEEEDEEEEAPDEFAYKPNGLLYKMAQKPIPITVHRLAHKPIGVPKRNSRWPMADEFDTKSDLSTPVVHSLPPRPRVAQLARSTKPPSTVDDT…	E
4175	-6.01552	1	6764197	6764221	3	8	91	43	0.399598	GAA	0.333333	0.352941	0.464286	0.303704	4175	AT1G19530	AT1G19530.1	unknown protein; FUNCTIONS IN: molecular_function unknown; INVOLVED IN: N-terminal protein myristoylation, anaerobic respiration; LOCATED IN: cellular_component unknown; EXPRESSED IN: leaf apex, inflorescence meristem, hypocotyl, root, flower; EXPRESSED DURING: petal differentiation and expansion stage; Has 47 Blast hits to 47 proteins in 13 species: Archae - 0; Bacteria - 0; Metazoa - 0; Fungi -…	N/A	hard to see but apparently there	MGSLMSGWDSRVRDPKSVRRCKSLTREEIDTFWKTKKKNEEEEHVQAFSKLVTQEGAQSQAKEKKSVDDLFENQSKSSGWWRKTYWAFLNEPREEEGRPNNYVSQFKVAHIAKIAGS	E
99419	-5.47682	5	18723569	18723589	2	10.5	100	42	0.908802	GA	0.5	0.470588	0.48	0.347826		AT5G46190			N/A	dinuc!!	MVERGKRTHNRFRDNNNDNNRNQRRRLSYESEEKKIDNKDDLVVVYRILCPSGVMGSVIGKSGKVINLIRQETRARIKVVDPFPGCSERVITIFCSVSEKKDIVDIEYSELDYSVPLCSAQAALLKVHDAIVASLATAAENTKIDRDDFRECRLLVPSSQCSIVIGKSGSIIKNIRGRTRANVKVVSKDVSDPSHTCAMDFDNIVMISGETESVKKALFAVSAIMYKVSPREQIPLDTTVQEVPASIIIPSDLSIYPQAGLYPSQDSIFQHGANVSSFIGTLPQGYGENAANPVPVFSASALPVVHGFGGSSRSEKLAIKVICSSSKIGRVIGKGGLTIKGIRQASGSHIEVNDSRTNHDDDCVITVTATESPDDLKSMAVEAVLLLQEKINDEDEDKV…	ER
66130	-5.22945	4	1417495	1417520	3	8.3	91	45	0.457624	GAA	0.333333	0.333333	0.47619	0.325926	66130	AT4G03220	AT4G03220.1	Protein with RNI-like/FBD-like domains; CONTAINS InterPro DOMAIN/s: F-box domain, cyclin-like (InterPro:IPR001810), FBD (InterPro:IPR013596), F-box domain, Skp2-like (InterPro:IPR022364), FBD-like (InterPro:IPR006566); BEST Arabidopsis thaliana protein match is: F-box/RNI-like superfamily protein (TAIR:AT3G59210.4); Has 1478 Blast hits to 1464 proteins in 18 species: Archae - 0; Bacteria - 0; Met…	N/A	K/E, Nterm	METRSVKRKKKKKEEEANWFIRVDRISNLPDSLNHQILLLLPLKSAAQASLLSKRWRSLFLSLPDLDFTSINDLKNPKSFSSNSIYKVLSLRSHRDSNNLRSLRFRVPVTFTSLNSLIRLAVTHQVQDLDIEVTTKDYFNFPRWIVTSQNLRALTLKSANLGFRLPPSSSARGGFQKLTSLSLSRVILHNQPCLSDFFTDPSFPLLEKLTLECCFGLKELKVSCRLLQEFSLKNSLQLEGLEVSGNKLQKLKVESCFYSYSEKSFVKINTPNLKTFLWNSNAVTTSVHFLDKLVCLRKAFVKVFWHHQDLNSQIQSLFTLLSGLCHSYKLQLGNQSVEILSSKKGLLKNHLLPFHNMRFLELQTRLNRHNVQTLSCLFKSCPMLNILTVKIIDDQTSER…	K
60946	-5.06258	3	17559661	17559682	3	7.3	100	44	0.435838	CAA	0.333333	0.5	0.592593	0.445255	60946	AT3G47620	AT3G47620.1	Encodes a transcription factor AtTCP14 that regulates seed germination. AtTCP14 shows elevated expression level just prior to germination. AtTCP14 is predominantly expressed in the vascular tissue of the embryo, and affects gene expression in radicles in a non-cell-autonomous manner.	TCP14	multiple strs	MQKPTSSILNVIMDGGDSVGGGGGDDHHRHLHHHHRPTFPFQLLGKHDPDDNHQQQPSPSSSSSLFSLHQHQQLSQSQPQSQSQKSQPQTTQKELLQTQEESAVVAAKKPPLKRASTKDRHTKVDGRGRRIRMPALCAARVFQLTRELGHKSDGETIEWLLQQAEPSVIAATGTGTIPANFTSLNISLRSSGSSMSLPSHFRSAASTFSPNNIFSPAMLQQQQQQQRGGGVGFHHPHLQGRAPTSSLFPGIDNFTPTTSFLNFHNPTKQEGDQDSEELNSEKKRRIQTTSDLHQQQQQHQHDQIGGYTLQSSNSGSTATAAAAQQIPGNFWMVAAAAAAGGGGGNNNQTGGLMTASIGTGGGGGEPVWTFPSINTAAAALYRSGVSGVPSGAVSSGLHF…	Q
80842	-5.04885	4	17145850	17145896	3	15.7	90	52	1.093	GGA	0.666667	0.391304	0.636364	0.459259		AT4G36230			N/A	protein mostly Gs	MESVRESSLSSLMLFLFGLAYVVFLLNSNCVNGLRDLKERDASESNFVNATSSSVLDSKSTANISTVEFENALDDQNVNKTEKCESRAGGGGGGGGGGGGGGGGQGSGGGGGEGNGGNGKDNSHKRNKSSGGGGGGGGGGGGGSGNGSGRGRGGGGGGGGGGGGGGGGGGGGGGGGGGGGGSDGKGGGWGFGFGWGGDGPGGNFGRCWYPGCTKKSTESHN	G
43118	-4.9216	2	17044407	17044428	3	7.3	100	44	0.435838	AGT	0.333333	0.4375	0.592593	0.481752	43118	AT2G40830	AT2G40830.2	Encodes a putative RING-H2 finger protein RHC1a.	RHC1A		MSSSRNTHWCHRCQRAVRLHGQEPVCFYCGGGFVEELDMAQASPFDMFRSHRGVVERDQTFDLMDAFSVFMRNRLAERSHDREIRGRTISSGPENFPGLAPLLIFGGQVPYRLTGDNAVEALFNGGSPGIGITRGNTGDYFFGPGLEELFEQLSAGTTRRGPPPAPRSAIDALPTIKIAQRHLRSSDSNCPVCKDEFELGSEAKQMPCNHIYHSDCIVPWLVQHNSCPVCRQELPSASGPSSSQNRTTPTRNYRSSSSSSSSNSRENGNERRNPFSSFWPFRSSGSSSSSTQNRGGTRNSDTSDENHNYHQQQHQQSYMGYSGWPFDY	S
100102	-4.89496	5	19611477	19611504	3	9.3	92	49	0.646654	ACA	0.333333	0.555556	0.5	0.478261	100102	AT5G48385	AT5G48385.1	FRIGIDA-like protein; CONTAINS InterPro DOMAIN/s: Frigida-like (InterPro:IPR012474); BEST Arabidopsis thaliana protein match is: FRIGIDA-like protein (TAIR:AT4G14900.1); Has 1269 Blast hits to 1187 proteins in 101 species: Archae - 0; Bacteria - 22; Metazoa - 72; Fungi - 9; Plants - 1133; Viruses - 0; Other Eukaryotes - 33 (source: NCBI BLink).	FRL3	N/I, multiple strs	MEDTRSVASLMDSTSSKIQQLQKAFAELESQRAVTLNLKWKELEEHFHGLERSLKRRFHELEDQEKEYETKTRKAQELLEKKKAAVEAKEKAALERLQKKRDAAMFTINSALDKYNNAPVSKPSVGERWPQNAVEDSSNVFAADSITDDNPDGIVQDVQISPVMGNYEVKAYPQLLKLCGDMDSTGLHKFVSDNRKNLASLKEEIPMAFRAAANPASLVLDSLEGFYPMEAPTADGKKDANLLGMRRTCIMLMECLSILLSGLDRNCLAVVLSQNVKHRAKTIAEGWNPLLESLDMDACNGNSLEAHAFLQLLATFAIVADFKEDELLKLIPMVSRRRQAAELCRSLGLAEKMPGVIEVLVNSGKQIDAVNLAFAFELTEQFSPVSLLKSYLIEARRSS…	N
78980	-4.8802	4	14142455	14142482	3	9.3	92	42	0.646654	TTC	0.333333	0.5	0.52	0.437037	78980	AT4G28640	AT4G28640.2	Auxin induced gene, IAA11 (IAA11).	IAA11		MEGGSASGSASALSNDENLVVSCEDSSSPIGNELELGLTLSLGRKGYRDCRVYADDSSSSSSSSSLSRASVIAGIKRTADSMAATSGQVVGWPPIRTYRMNSMVNQAKASATEDPNLEISQAVNKNRSDSTKMRNSMFVKVTMDGIPIGRKIDLNAHKCYESLSNTLEEMFLKPKLGSRTLETDGHMETPVKILPDGSSGLVLTYEDKEGDWMLVGDVPWGMFIGSVRRLRIMKTSEATGKAQMIL	S
1855	-4.87064	1	3146868	3146895	3	9.3	92	49	0.646654	ATC	0.333333	0.4375	0.482759	0.4	1855	AT1G09720	AT1G09720.1	Kinase interacting (KIP1-like) family protein; CONTAINS InterPro DOMAIN/s: KIP1-like (InterPro:IPR011684); BEST Arabidopsis thaliana protein match is: kinase interacting family protein (TAIR:AT1G58210.1); Has 36531 Blast hits to 24166 proteins in 1497 species: Archae - 615; Bacteria - 4202; Metazoa - 18004; Fungi - 3193; Plants - 2001; Viruses - 107; Other Eukaryotes - 8409 (source: NCBI BLink).	NET2B		MLQRAASNAYSWWWASHIRTKQSKWLEHNLQDMEEKVKYTLKIIDGDGDSFAKRAEMYYRKRPEIVNFVEEAFRSYRALAERYDHLSTELQSANHMIATAFPEHVPFPLVDDDDDDDDDNPKKPPKHLHLIPSGTNIPQVPEVPKKEFKSQSLMVLSRKEPGVLQSSETSSALVSSGLSREEALEEIDKIHKGILVLQTEKEFVRSSYEQSYDRYWNLENEVEEMQKRVCSLQDEFGVGGEIEDGEARTLVATAALSSCKETIAKLEETQKRFSEDAGIEKERIDTATERCEALKKKFEIKVEEQAKKAFHGQESSYESVKESRQIDLNENLSNVDFAEKIDELVEKVVSLETTALSHTALLKTLRSETNELQDHIRDVEKDKACLVSDSMDMKKRITV…	D
46146	-4.86461	3	2583881	2583908	3	9.3	92	49	0.646654	TCA	0.333333	0.4375	0.482759	0.362963	46146	AT3G08510	AT3G08510.1	Phosphoinositide-specific phospholipase C (PI-PLC), catalyzes hydrolysis of phosphatidylinositol 4,5-bisphosphate into inositol 1,4,5-trisphosphate and diacylglycerol.	PLC2		MSKQTYKVCFCFRRRFRYTASEAPREIKTIFEKYSENGVMTVDHLHRFLIDVQKQDKATREDAQSIINSASSLLHRNGLHLDAFFKYLFGDNNPPLALHKVHHDMDAPISHYFIFTGHNSYLTGNQLSSDCSEVPIIDALKKGVRVIELDIWPNSNKDDIDVLHGMTLTTPVGLIKCLKAIRAHAFDVSDYPVVVTLEDHLTPDLQSKVAEMVTEIFGEILFTPPVGESLKEFPSPNSLKRRIIISTKPPKEYKEGKDVEVVQKGKDLGDEEVWGREVPSFIQRNKSEAKDDLDGNDDDDDDDDEDKSKINAPPQYKHLIAIHAGKPKGGITECLKVDPDKVRRLSLSEEQLEKAAEKYAKQIVRFTQHNLLRIYPKGTRVTSSNYNPLVGWSHGAQMV…	D
3384	-4.73331	1	5639489	5639520	3	11	90	52	0.835069	TCA	0.333333	0.5625	0.464286	0.426471	3384	AT1G16500	AT1G16500.1	unknown protein; BEST Arabidopsis thaliana protein match is: unknown protein (TAIR:AT1G79160.1); Has 136 Blast hits to 134 proteins in 17 species: Archae - 0; Bacteria - 0; Metazoa - 0; Fungi - 4; Plants - 131; Viruses - 1; Other Eukaryotes - 0 (source: NCBI BLink).	N/A	H/S	MAADVSSLVRILSRFKDDRTVVKDSTGPRSTVALMTRDLLGIGGCVGGGGGGDEQSLELDLDVQVPNGWEKRLDLKSGKVYLQQQCNSTSSSSSSHHHHHHHEDQTNQTVPRFQDLNVPPISDKFPAKPLLSLFDDDDDTSLELKLVPSSISRPLPPPLSSFSPNQSLSYLSSVCTLDKVKLALERAEKDTKKRQSPEDDGVYDGTASATVAASQVAAGCPGCLSYVFVAKNNPKCPRCHSFVPLPAMKKPKIDLNISM	H
46632	-4.52786	3	3476858	3476906	3	16.3	89	63	1.09269	CAT	0.333333	0.428571	0.583333	0.414815	46632	AT3G11100	AT3G11100.1	sequence-specific DNA binding transcription factors; FUNCTIONS IN: sequence-specific DNA binding transcription factor activity; INVOLVED IN: regulation of transcription; LOCATED IN: nucleus; EXPRESSED IN: 24 plant structures; EXPRESSED DURING: 15 growth stages; CONTAINS InterPro DOMAIN/s: MADF domain (InterPro:IPR006578); BEST Arabidopsis thaliana protein match is: sequence-specific DNA binding t…	N/A	D/E	METTPETQSKTHRLPAGREDWWSEDATATLIEAWGDRYVNLNRGNLRQNDWKEVADAVNSSHGNGRPKTDVQCKNRIDTLKKKYKTEKAKPLSNWCFFDRLDFLIGPVMKKSSGAVVKSALMNPNLNPTGSKSTGSSLDDDDDDDDDDEEDDDDAGDWGFVVRKHRKVEDVDSSEGSAFRELARSILKLGEAFERIEGKKQQMMIELEKQRMEVAKELELQRMNMLMEMQLELEKSKLGKRRAASGKKL	D
4021	-4.36116	1	6550992	6551020	3	9.7	92	51	0.705979	GAA	0.333333	0.352941	0.571429	0.407407	4021	AT1G18950	AT1G18950.1	DDT domain superfamily; CONTAINS InterPro DOMAIN/s: DDT domain (InterPro:IPR004022); BEST Arabidopsis thaliana protein match is: unknown protein (TAIR:AT5G25580.1); Has 20293 Blast hits to 13585 proteins in 823 species: Archae - 41; Bacteria - 1919; Metazoa - 8043; Fungi - 2539; Plants - 1031; Viruses - 220; Other Eukaryotes - 6500 (source: NCBI BLink).	DDR4		MGSSSDIVPDRSPADDVAPVTDTKIPKEEPLTLRRTRPSRACTVRAQQRLQELQAAERKLKPPKKEYKREQHRRREEVVEEDEDSEDDDQEDEENDGDDESNPKQCVAGGSSTKIITSLVPPPEPSQMPRWNLRSMWELASVLNFLHVFRPLLKINAEFSAEEFETALLTPNDTLSDIHIPLLKAIPPVTRMALTRDTWVTVLCRKIRDCWHWVAEGDLPIVALQGREIEVYKNLDPAIRVVILKALCDIRVEQEDIRSYIDNSLKTGVHLSVFRKDRVGGDSHGVNFWYEEDPLIGHRLYREIRKAEVLKVKTKGSKILPNITYQWETVATNFDEFQDVSEKLLQSSSRIEVSLGKKLVKDMLPEIEKEHKRKEKLLKKQHRQALLLDNFVVVDGLAG…	E
27095	-4.36098	2	1187750	1187778	3	9.7	92	51	0.705979	GAA	0.333333	0.4375	0.517241	0.355556	27095	AT2G03890	AT2G03890.1	Phosphoinositide kinase which undergo autophosphorylation and phosphorylate serine/threonine residues of protein substrates. Contains phosphoinositide 3/4-kinase and ubiquitin-like domains.	PI4KG7	E/D	MSRNLDSPVQTQMAVAVFKTPLTGASKMEGKQHHKHQHLQRQSSGRRVFVQTETGCVLGMELDRSDNVHTVKRRLQIALNFPTEESSLTYGDMVLTNDLSAVRNDSPLLLKRNFMHRSSSTPCLSPTGRDLQQKDRSGPIEILGHSDCFSIVKHMVKDIVKAMKMGVEPLPVHSGLGGAYYFRNKRGESVAIVKPTDEEPFAPNNPKGFVGKALGQPGLKSSVRVGETGFREVAAYLLDYGRFANVPPTALVKITHSVFNVNDGVKGNKPREKKLVSKIASFQKFVAHDFDASDHGTSSFPVTSVHRIGILDIRIFNTDRHGGNLLVKKLDGVGMFGQVELIPIDHGLCLPETLEDPYFEWIHWPQASLPFSDEEVDYIQSLDPVKDCDMLRRELPMIR…	E
96827	-4.33978	5	15905155	15905178	3	8	90	41	0.379879	TGA	0.333333	0.45	0.4	0.340741	96827	AT5G39740	AT5G39740.1	Encodes a ribosomal protein RPL5B that is involved in ribosome biogenesis and plays a role in organ size control by promoting cell proliferation and preventing compensation in normal leaf development.	RPL5B	D/E, Cterm	MVFVKSSKSNAYFKRYQVKFRRRRDGKTDYRARIRLINQDKNKYNTPKYRFVVRFTNKDIVAQIVSASIAGDIVKASAYAHELPQYGLTVGLTNYAAAYCTGLLLARRVLKMLEMDDEYEGNVEATGEDFSVEPTDSRRPFRALLDVGLIRTTTGNRVFGALKGALDGGLDIPHSDKRFAGFHKENKQLDAEIHRNYIYGGHVSNYMKLLGEDEPEKLQTHFSAYIKKGVEAESIEEMYKKVHAAIRAEPNHKKTEKSAPKEHKRYNLKKLTYEERKNKLIERVKALNGAGGDDDDEDDEE	D
64679	-4.33906	3	23164512	23164535	3	8	90	41	0.379879	CTT	0.333333	0.5625	0.464286	0.477941	64679	AT3G62630	AT3G62630.1	Protein of unknown function (DUF1645); CONTAINS InterPro DOMAIN/s: Protein of unknown function DUF1645 (InterPro:IPR012442); BEST Arabidopsis thaliana protein match is: Protein of unknown function (DUF1645) (TAIR:AT2G15760.1); Has 309 Blast hits to 289 proteins in 68 species: Archae - 3; Bacteria - 16; Metazoa - 56; Fungi - 10; Plants - 169; Viruses - 0; Other Eukaryotes - 55 (source: NCBI BLink).	N/A	S/R	MDLVESFSHGDPDTPRFSDDFGSGSACSTPFVSAPSSPGRGPPPGYFFSAPSSPMHFFLCSASSSSENPKKLDTSSCGDFEFDFSSRLSSSSGPLGGVSMTSAEELFSNGQIKPMKLSSHLQRPQILSPLLDLENEEEDDDDETKPNGEMKRGRDLKLRSRSVHRKARSLSPLRNAAYQWNQEEGEEEEVAGEREVKECIRKLQEDENVPSAETTPSCSASSSRSSSYGRNSKKWIFLKDLLHRSKSEGRGNGKEKFWSNISFSPSNFKDKKLKSSQLEEKPIQETVDAAVESKKQKQKQPPAKKAPVNGKPTNGIAKRRGLQPSAHELHYTTNRAQAEEMKKRTYLPYRHGLFGCLGFSSKGYSALNGLARSLNPVSSG	S
79202	-4.33833	4	14388257	14388280	3	8	90	41	0.379879	ATC	0.333333	0.3125	0.448276	0.348148	79202	AT4G29180	AT4G29180.2	root hair specific 16 (RHS16); FUNCTIONS IN: kinase activity; INVOLVED IN: protein amino acid phosphorylation; LOCATED IN: endomembrane system; EXPRESSED IN: root hair; CONTAINS InterPro DOMAIN/s: Protein kinase, ATP binding site (InterPro:IPR017441), Protein kinase, catalytic domain (InterPro:IPR000719), Leucine-rich repeat (InterPro:IPR001611), Serine-threonine/tyrosine-protein kinase (InterPro…	N/A		MGAHSVFLILFSVIAIAIVVHGQGQAGFISIDCGSPPNINYVDTDTGISYTWDAPFINAGVNLNVSEEYGYPKNPVLPFPLADVRSFPQGNRNCYTLTPSDGKGNLYLIRASFMYGNYDGKNALPEFDLYVNVNFWTSVKLRNASENVIKEILSFAESDTIYVCLVNKGKGTPFISALELRPMNSSIYGTEFGRNVSLVLYQRWDTGYLNGTGRYQKDTYDRIWSPYSPVSWNTTMTTGYIDIFQSGYRPPDEVIKTAASPKSDDEPLELSWTSSDPDTRFYAYLYFAELENLKRNESREIKIFWNGSPVSGAFNPSPEYSMTVSNSRAFTGKDHWISVQKTAESTRPPILNAIEIFSAQSLDEFYTRIDDVQAIESIKSTYKVNKIWTGDPCSPRLFP…	S
6180	-4.33446	1	9556481	9556504	3	8	90	41	0.379879	TTC	0.333333	0.5	0.541667	0.375	6180	AT1G27510	AT1G27510.1	FUNCTIONS IN: DNA binding, nuclease activity; INVOLVED IN: response to singlet oxygen; LOCATED IN: thylakoid membrane; EXPRESSED IN: 22 plant structures; EXPRESSED DURING: 13 growth stages; CONTAINS InterPro DOMAIN/s: Protein of unknown function DUF3506 (InterPro:IPR021894), UvrB/UvrC protein (InterPro:IPR001943); BEST Arabidopsis thaliana protein match is: Protein of unknown function (DUF3506) (…	EX2	E/V	MATTQPCLIGQIIAVPQFHILFSPRNSLKPELSTNKRTNFSVSIGLRHSFASSISTCNPKAPSLSCLRNCAAVDGADTSSSEDKWDWDWDRWNRHFSEIEEVESVVSLLKSQLEDAVEKEDFEEAVKLKQAISEATVDDAVAEIMRQLQTAVNEERYHDASRLCNETGSGLVGWWVGLPRDSEEPFGRIVHITPGVGRFIGKSYSPRQLVAEAAGTPLFEIFVIKDTDGGYVMQVVYVQHVKQNLTISENSFSKVQQSSKSSINDPSILDVRGSELKVDKKEDTQLNAGEPTEEGIKNVIKFLKDKIPGLKLKVMDVIKIPEEEIVGSDDATEELVGEGTEETNSSDDEEEVEEEENDSIEAISSMDSADYGKHSNTKLVIGGVLHNIEDSSIDDEIVR…	E
100984	-4.33287	5	20736417	20736440	3	8	90	41	0.379879	AAG	0.333333	0.470588	0.444444	0.397059	100984	AT5G50970	AT5G50970.1	transducin family protein / WD-40 repeat family protein; CONTAINS InterPro DOMAIN/s: WD40 repeat-like-containing domain (InterPro:IPR011046), WD40 repeat 2 (InterPro:IPR019782), WD40-repeat-containing domain (InterPro:IPR017986), WD40 repeat (InterPro:IPR001680), WD40/YVTN repeat-like-containing domain (InterPro:IPR015943), WD40 repeat, subgroup (InterPro:IPR019781); BEST Arabidopsis thaliana pro…	N/A	E/D, Nterm	MSELCTNPKKPKLKEEDEEEEANVSCREEQEEVLVALVEHRSNEIERLNNHISNYQTKLIEAERSLQNSKAKLAQLRGVAVPSISGAKKDHKPLKTLRNVNVSEDYASPSPSKTLRPSDSSDHPRSSCGSSVSKAKTVVVKQKSETSRDSPNVKDRGIKRKFEQKEHKELIRLIARNSSPTTIKCHTSNQISSQHKRKLRSLILCPVNEQLFATSSLDGMVSLWQLQPGRLVASLLSTTDCLSRKQRRWAEDMAWHPSGNTLFSVYTADDGDSQISILNLNKTREVTFLENKPHVKGIINNIKFMPWENTCFVTGGSDHAVVLWNESDDEENKWKSKPLHRNLHSAAVMGVDGMKNKNVILSVGADKRIYGFDVQVGRADYKHQIDYKCMSVLANPCDF…	E
99634	-4.33277	5	19016838	19016860	3	8	90	41	0.379879	GAA	0.333333	0.611111	0.407407	0.4	99634	AT5G46870	AT5G46870.1	RNA-binding (RRM/RBD/RNP motifs) family protein; FUNCTIONS IN: oxidoreductase activity, nucleotide binding, nucleic acid binding; INVOLVED IN: oxidation reduction; EXPRESSED IN: cultured cell; CONTAINS InterPro DOMAIN/s: Aldo/keto reductase (InterPro:IPR001395), RNA recognition motif, RNP-1 (InterPro:IPR000504), Nucleotide-binding, alpha-beta plait (InterPro:IPR012677); BEST Arabidopsis thaliana …	N/A	E/K	MSMVTVKVSNVSLEATERDLKEFFSFSGDIAYLETQSENDGSKLAYVTFKDLQGAETAVLLTGSTIVDSSVTVTMSPDYQLPPDALASIESLKESNKSSSPTREDVSVFRKAEDVVSGMISKGFVLGKDAIAKAKSLDEKHQLTSTASARVTSFDKRIGFTEKINTGTTVVSEKVKEVDQKFQVTEKTKSAIAAAEQTVSNAGSAIMKNRYVLTGATWVTGAFNRVSKAAEEVGQKAKEKVGLAEEEEEEKKKVVDEVAIVHLTESPKALDQSEQDSKLPESKSQPHKELNASVV	E
61522	-4.33273	3	18391264	18391286	3	8	90	41	0.379879	TCT	0.333333	0.5625	0.444444	0.40146	61522	AT3G49610	AT3G49610.1	FUNCTIONS IN: DNA binding; INVOLVED IN: regulation of transcription, DNA-dependent; LOCATED IN: cellular_component unknown; CONTAINS InterPro DOMAIN/s: Protein of unknown function DUF313 (InterPro:IPR005508), Transcriptional factor B3 (InterPro:IPR003340); BEST Arabidopsis thaliana protein match is: Domain of unknown function (DUF313) (TAIR:AT5G24050.1); Has 142 Blast hits to 142 proteins in 6 sp…	N/A		MNRNHHDHLDAAGKDMWSRLSDLADKADMLYEREGISKDRKSVSEEEEEKKTRFSILVDLVGRLCDQEERRTLGSSPTKTNTLFEGSEKSHLDHHLDHLPQKPRSSLECFFTRVYTRRNHNNVSTSSSLFNTDEFERTETKSPTIRNSQSSPSSCLMENTKRKRYQSSGKSKKPKFDPFSLTAARETPEWLLDVMRKMKGAEGPIKLIYEKTLTATDVKPSESRLLIPFNKLLRNDFLTPEESRAIAIDKEEEEEDTKKIGVKTIIVNQFSKEWSLRFLIWVMKKKKSGNGTLYYTLNRGWNGVVSGNKLKANDNISLWTFRCGGVLCFALEKE	E
63029	-4.33252	3	20561119	20561142	3	8	100	48	0.573207	TGG	0.666667	0.1875	0.551724	0.496296	63029	AT3G55460	AT3G55460.1	encodes an SC35-like splicing factor that is localized to nuclear specks. Barta et al (2010) have proposed a nomenclature for Serine/Arginine-Rich Protein Splicing Factors (SR proteins): Plant Cell. 2010, 22:2926.	SCL30	2 selected strs, Nterm	MRRYSPPYYSPPRRGYGGRGRSPPPPPPRRGYGGGGGGGGRRGSSHGSLLVRNIPLDCRPEELREPFERFGPVRDVYIPRDYYSGQPRGFAFVEFVDAYDAGEAQRSMNRRSFAGREITVVVASESRKRPEEMRVKTRTRSREPSGSRDRSHGRSRSRSISRSRSPRRPSDSRSRYRSRSYSPAPRRRGGPPRGEEDENYSRRSYSPGYEGAAAAAPDRDRNGDNEIREKPGYEAEDRRRGGRAVSRSPSGSRSRSVEVSPR	G
43566	-4.32088	2	17748449	17748469	3	7	100	42	0.37134	AAG	0.333333	0.75	0.68	0.510791	43566	AT2G42610	AT2G42610.1	LIGHT SENSITIVE HYPOCOTYLS 10 (LSH10); CONTAINS InterPro DOMAIN/s: Protein of unknown function DUF640 (InterPro:IPR006936); BEST Arabidopsis thaliana protein match is: Protein of unknown function (DUF640) (TAIR:AT1G07090.1); Has 309 Blast hits to 309 proteins in 18 species: Archae - 0; Bacteria - 0; Metazoa - 12; Fungi - 0; Plants - 297; Viruses - 0; Other Eukaryotes - 0 (source: NCBI BLink).	LSH10	Cterm,multiple strs	MSSPRERGKSLMESSGSEPPVTPSRYESQKRRDWNTFGQYLKNQRPPVPMSHCSCNHVLDFLRYLDQFGKTKVHVPGCMFYGQPEPPAPCTCPLRQAWGSLDALIGRLRAAYEENGGPPETNPFASGAIRVYLREVRECQAKARGIPYKKKKKKKPTPEMGGGREDSSSSSSSFSFS	K
81565	-4.25109	4	18179046	18179071	3	8.7	91	45	0.530293	GAA	0.333333	0.529412	0.64	0.463768	81565	AT4G39010	AT4G39010.1	glycosyl hydrolase 9B18 (GH9B18); FUNCTIONS IN: hydrolase activity, hydrolyzing O-glycosyl compounds, catalytic activity; INVOLVED IN: carbohydrate metabolic process; LOCATED IN: endomembrane system; EXPRESSED IN: 16 plant structures; EXPRESSED DURING: 8 growth stages; CONTAINS InterPro DOMAIN/s: Six-hairpin glycosidase (InterPro:IPR012341), Glycoside hydrolase, family 9, active site (InterPro:IP…	N/A	Nterm	MKLHLHPLSLVFFFFFFFFRPTMSSNQHDYSDALSKSILFFEGQRSGYLPNDQRMTWRRNSGLSDGWTHNIDLTGGYYDAGDNVKFNFPMAFTTTMLAWSVIEFGEFMPSSELRNSLVALRWSSNYLLKSVSQLPNRIFVQVGDPIADHNCWERPEDMDTPRTAYAVNAPNPASEVAGETTAALSAASIAFRSSDPGYSQTLLQNAVKTFQFADMYRGAYSSNDDIKNDVCPFYCDFNGFQDELLWGAAWLRKATGDESYLNYIESNREPFGANDNVDEFGWDNKVGGLNVLVSKEVIEGNMYNLEAYKASAESFMCSLVPESSGPHVEYTSAGLLYKPGGSQLQHATTISFLLLVYAQYLSRSSLSLNCGTLTVPPDYLRRLAKKQVDYILGNNPMGL…	F
46357	-4.24965	3	3024925	3024948	3	7.7	90	41	0.31861	TCA	0.333333	0.473684	0.545455	0.388489	46357	AT3G09850	AT3G09850.1	D111/G-patch domain-containing protein; FUNCTIONS IN: nucleic acid binding; INVOLVED IN: biological_process unknown; LOCATED IN: intracellular, chloroplast; EXPRESSED IN: 25 plant structures; EXPRESSED DURING: 14 growth stages; CONTAINS InterPro DOMAIN/s: D111/G-patch (InterPro:IPR000467); BEST Arabidopsis thaliana protein match is: GC-rich sequence DNA-binding factor-like protein with Tuftelin i…	N/A	D/ES	MRGGGRRRSNGGGSSGKNKAKSPGQSTRTNHNSAAGSSSGGRHRRQNNTTLFVEGGILSDYRKDPNFSTPSRGGSSSGKGLRSRSIERVKASASTSGPRKCSGNTYVYQYPSIDFEEGLDRRSGVESDQMNESPLVLGKSEATQIVAFLDQTPSSSKGIKVSYDYEYEPSYVLGDDSHKGLGFCDDSDATPSGSLSIPKALGDQGGSFSHEEEGDAVDESGGNDDELMPDVVKTPKRRNSGFISIGGMKLYTEDVSGEESDGEEEMNDDDDDESGDEGSSGSSELSESDSSEDMFGSYSEIDDDVAKDYLEGIGGSEIMLDAHWLAEQSLDKLDLSSDDSSSSDSSDRKTRKLTGIRLQKASMEYGKKKTTRSGYSGHGKSTNPLAMDDLMFVKDPRSL…	D
100094	-4.24577	5	19596364	19596389	3	8.7	91	45	0.530293	GAA	0.333333	0.625	0.576923	0.449275	100094	AT5G48360	AT5G48360.1	Actin-binding FH2 (formin homology 2) family protein; FUNCTIONS IN: actin binding; INVOLVED IN: cellular component organization, actin cytoskeleton organization; EXPRESSED IN: 18 plant structures; EXPRESSED DURING: 9 growth stages; CONTAINS InterPro DOMAIN/s: Actin-binding FH2/DRF autoregulatory (InterPro:IPR003104), Actin-binding FH2 (InterPro:IPR015425); BEST Arabidopsis thaliana protein match …	FH9	E/D, multiple strs	MQNFWFAIFFFLLTCAPPSPLSYASTVTLSRRLLYDYESPLPLPLSPISPPFFPLESSPPSPPPPLPPTPPTTFAVFPTFPANISALVLPRSSKPHHTSPTLLLPALSAVLVIATVIGLALFLYGRHRGQTRHLKNSHCSSSNTSSYGDEQSHITTNFNMAATTSPSEVFYLNTEESDHIRTGGTFFLKQDSPEIRPLPPLPPRSFHHNNYETEVNEEDEEEEEDVFFSPMASLPGSANSSPSHSCSSSCSGWVSPARSFSITMSPPNPRYSDATNLQSPSPERLRVRKNYNGNGSSSLRMFSFWNQNMGFGFPRISSASTSPDRGFIRTPLSSLYSSVSTSPDGLFRKFLDSSPPIWNDFSRNVKSVLLSHTASSRRDFVINIGESSSQQSKVPALPP…	E
4809	-4.23529	1	7735064	7735089	3	8.7	91	45	0.530293	AGA	0.333333	0.411765	0.5	0.414815	4809	AT1G21980	AT1G21980.1	Type I phosphatidylinositol-4-phosphate 5-kinase. Preferentially phosphorylates PtdIns4P. Induced by water stress and abscisic acid in Arabidopsis thaliana. Expressed in procambial cells of leaves, flowers and roots. A N-terminal Membrane Occupation and Recognition Nexus (MORN)affects enzyme activity and distribution.	PIP5K1	E/D, Nterm	MSDSEEDEEEEEASEVILSSVVQKKKKKNLRFGEEVERRDGLVLLAQSTPMVRSRSQGTTRRVTPTPLVDVEKPLPNGDLYIGSFSGGFPHGSGKYLWKDGCMYEGDWKRGKASGKGKFSWPSGATYEGEFKSGRMEGFGTFTGADGDTYRGTWVADRKHGHGQKRYANGDFYEGTWRRNLQDGRGRYVWRNGNQYTGEWRSGVISGKGLLVWPNGNRYEGLWENGIPKGNGVFTWSDGSSCVGAWNESNIMRSFFNGVEKNDLIVGNRKRSSVDSGAGSLGGEKVFPRICIWESDGEAGDITCDIIDNVEASMIYRDRISVDRDGFRQFKKNPCWFNGEAKKPGQTISKGHKKYDLMLNLQLGIRYSVGKHASIVRDLKQTDFDPKEKFWTRFPPEGT…	E
43528	-4.22779	2	17688554	17688579	3	8.7	91	45	0.530293	TCA	0.333333	0.5625	0.444444	0.379562	43528	AT2G42480	AT2G42480.1	TRAF-like family protein; CONTAINS InterPro DOMAIN/s: TRAF-like (InterPro:IPR008974), MATH (InterPro:IPR002083); BEST Arabidopsis thaliana protein match is: TRAF-like family protein (TAIR:AT2G42470.1); Has 20820 Blast hits to 13670 proteins in 1127 species: Archae - 516; Bacteria - 2848; Metazoa - 7681; Fungi - 1563; Plants - 1737; Viruses - 68; Other Eukaryotes - 6407 (source: NCBI BLink).	N/A	D/Y	MWNQKPCFRFEIDNFSEKKDVIASKAFVSGGCEWFLYLYPKGQSLNDDHMSLYLSVANSKSLGSGWKRSAKFYFSVLNESDKELYRSTISQEFCLFCVQALAWGIRKALPLSKFEEKGFLEKDKLIVEVYIKNFEAVDGEGGGVSKKEEEETVEIIGSQDYASQVTLVRKIFAEHPEIAEEFKPKNQVFKKEYMNILRNAYRKVSELAEVKMDWVKSKIEEVSLEIKKRNDEVSEVPLDNKIADDDDDDYDEWEQDIEERLKNLEGMEFDSKLDSLKSKLDEISLERKKSYDADGSRVQQLEERVKDIELILKSKLEEVSSEKKKKADADGSLEDRVKNLELMVSDLKVEVDNEKAKSSADGFLLVEEVA	D
60243	-4.22399	3	16897770	16897794	3	8.3	90	43	0.438104	TCT	0.333333	0.333333	0.653846	0.522059	60243	AT3G45980	AT3G45980.1	Encodes a histone 2B (H2B) protein. This protein can be ubiquitinated in planta, and this modification depends on the HUB1 and HUB2 E3 ubiquitin ligases as well as the UBC1 and UBC2 E2 ubiquitin conjugating enzymes. Lysine 146 appears to be the site of the ubiquitin addition.	H2B	K/M	MAPRAEKKPA EKKPAAEKPV EEKSKAEKAP AEKKPKAGKK LPKEAGAGGD KKKKMKKKSV ETYKIYIFKV LKQVHPDIGI SSKAMGIMNS FINDIFEKLASESSKLARYN KKPTITSREI QTAVRLVLPG ELAKHAVSEG TKAVTKFTSS	K
46108	-4.21635	3	2514215	2514239	3	8.3	90	43	0.438104	ACA	0.333333	0.375	0.482759	0.496296	46108	AT3G07880	AT3G07880.1	SUPERCENTIPEDE1 (SCN1); FUNCTIONS IN: Rho GDP-dissociation inhibitor activity; INVOLVED IN: root epidermal cell differentiation, cell tip growth; LOCATED IN: cytoplasm; EXPRESSED IN: 25 plant structures; EXPRESSED DURING: 15 growth stages; CONTAINS InterPro DOMAIN/s: Immunoglobulin E-set (InterPro:IPR014756), RHO protein GDP dissociation inhibitor (InterPro:IPR000406); BEST Arabidopsis thaliana p…	GDI1	N/K, Nterm	MSLVSGARDMGFDDNNNNKNNKDGDDENSSSRTRADDDALSRQMSESSLCATEEEEDDDSKLQLGPQYTIKEHLEKDKDDESLRKWKEQLLGSVDVTNIGETLDPEVRIDSLAIISPGRPDIVLLVPENGNPKGMWFTLKEGSKYNLKFTFHVNNNIVSGLRYTNTVWKTGVKVDRAKEMLGTFSPQLEPYNHVMPEETTPSGMFARGSYSARTKFLDDDNKCYLEINYSFDIRKEWPAL	N
50297	-4.20836	3	8952164	8952187	3	8.3	90	43	0.438104	CAT	0.333333	0.529412	0.434783	0.364286	50297	AT3G24535	AT3G24535.1	unknown protein; Has 28 Blast hits to 27 proteins in 8 species: Archae - 0; Bacteria - 0; Metazoa - 0; Fungi - 2; Plants - 26; Viruses - 0; Other Eukaryotes - 0 (source: NCBI BLink).	N/A		MVLRSSISNTRKLFQKTIDNFKSFFFNNGTYHKLPKTPNNTSTNINNDHPNSNIITSSSSSIHKQFQPKPKDYVTTNKASSLQPRIGDRDETLFSQPKVNLVRTKLKEMEKMMNDDIISDEYYVSDVIEFLHCYSRLRYTAYLDVVENFFMEVYSDFFSPHHLVGTRTAVQRRYPAVVGIGSYGGHKH	S
60270	-4.20772	3	16913892	16913916	3	8.3	90	43	0.438104	TCT	0.333333	0.375	0.413793	0.451852	60270	AT3G46030	AT3G46030.1	HTB11; FUNCTIONS IN: DNA binding; INVOLVED IN: nucleosome assembly; LOCATED IN: nucleus, nucleosome; EXPRESSED IN: 22 plant structures; EXPRESSED DURING: 13 growth stages; CONTAINS InterPro DOMAIN/s: Histone H2B (InterPro:IPR000558), Histone-fold (InterPro:IPR009072), Histone core (InterPro:IPR007125); BEST Arabidopsis thaliana protein match is: Histone superfamily protein (TAIR:AT3G45980.1); Has…	H2B	K/M	MAPRAEKKPA EKKPAAEKPV EEKSKAEKAP AEKKPKAGKK LPKEAGAGGD KKKKMKKKSV ETYKIYIFKV LKQVHPDIGI SSKAMGIMNS FINDIFEKLASESSKLARYN KKPTITSREI QTAVRLVLPG ELAKHAVSEG TKAVTKFTSS	K
46340	-4.20521	3	2994832	2994856	3	8.3	90	43	0.438104	GAA	0.333333	0.470588	0.642857	0.4	46340	AT3G09760	AT3G09760.1	RING/U-box superfamily protein; FUNCTIONS IN: zinc ion binding; EXPRESSED IN: 23 plant structures; EXPRESSED DURING: 15 growth stages; CONTAINS InterPro DOMAIN/s: Zinc finger, C3HC4 RING-type (InterPro:IPR018957), Zinc finger, RING-CH-type (InterPro:IPR011016); BEST Arabidopsis thaliana protein match is: RING/U-box superfamily protein (TAIR:AT5G03180.2); Has 1083 Blast hits to 1078 proteins in 12…	N/A		MMDDKARKEEEHHVSHQHNHSPLQRDGNSAEIAQGQELSSPGRDLWRRGLVLDLPSTTPEDTTRDDLFRRNASLTSSPVAKRVNFSPMSSPRVGQRGASLSPSSSTSSSSRNKPNSLKNLIPKLSFKNRNSNNDNVDIEKAADLGFVSSPSSGNGRDRSTWTLTNILTPRLKKTESLPVTPIAHSNPESTHGRFAVDLVTSTKKGPPLPIHRSRSVPAFNKDGSQRQLGVFRVIPTPNMSPTRNTIKLNDANVDGAEDVPEEEAVCRICLVELGEDSEAFKMECLCRGELALAHKECTIKWFTIKGNRTCDVCKQEVQNLPVTLLRMQNSRGSIGAPDAEAAHYSLWQDVPILVIVSMLAYFCFLEQLLLTKMQSGAIAVSLPFSCVLGLFASMTATTM…	S
83142	-4.19664	5	2069424	2069447	3	8	90	41	0.379879	TCC	0.666667	0.294118	0.607143	0.407407	83142	AT5G06710	AT5G06710.1	Homeobox-leucine zipper protein.	HAT14		MELALSLGDNTKKQFSFMEKNSKINNPSVSSTSTSEKDLGFCMALDVAFGGHRSLSSSSSPSVEDEKKKPAPRAKKSDEFRVSSSVDPPLQLQLHFPNWLPENSKGRQGGRMPLGAATVVEEEEEEEEAVPSMSVSPPDSVTSSFQLDFGIKSYGYERRSNKRDIDDEVERSASRASNEDNDDENGSTRKKLRLSKDQSAFLEDSFKEHSTLNPKQKIALAKQLNLRPRQVEVWFQNRRARTKLKQTEVDCEYLKRCCESLTEENRRLQKEVKELRTLKTSTPFYMQLPATTLTMCPSCERVATSAAQPSTSAAHNLCLSTSSLIPVKPRPAKQVS	E
22582	-4.19038	1	25622205	25622228	3	8	90	41	0.379879	CTC	0.666667	0.625	0.517241	0.488889	22582	AT1G68360	AT1G68360.1	C2H2 and C2HC zinc fingers superfamily protein; FUNCTIONS IN: sequence-specific DNA binding transcription factor activity; INVOLVED IN: regulation of transcription; LOCATED IN: intracellular; EXPRESSED IN: 12 plant structures; EXPRESSED DURING: 4 anthesis, F mature embryo stage, petal differentiation and expansion stage, E expanded cotyledon stage, D bilateral stage; CONTAINS InterPro DOMAIN/s: Z…	N/A		MEELDFSSKTTTSRLKLFGFSVDGEEDFSDQSVKTNLSSVSPERGEFPAGSSGRSGGGVRSRGGGGGGGERKYECQYCCREFGNSQALGGHQNAHKKERQQLKRAQLQATRNAAANFSNAGSASQFLRNPIVSAFAPPPHLLSSSAVPQPMGGPWMYLPRVSPSQLHVSHGCVIQDGSGGAGAGGFSYEYGARDSGFGVVGAQMRHVQAHGPRPSVNGFSREVGTTFDDGLGLDLHLSLAPAGH	G
43900	-4.0906	2	18338587	18338612	3	8.7	91	45	0.530293	TCC	0.666667	0.375	0.5	0.441176	43900	AT2G44440	AT2G44440.1	Emsy N Terminus (ENT) domain-containing protein; FUNCTIONS IN: molecular_function unknown; INVOLVED IN: biological_process unknown; LOCATED IN: cellular_component unknown; EXPRESSED IN: 17 plant structures; EXPRESSED DURING: 9 growth stages; CONTAINS InterPro DOMAIN/s: ENT (InterPro:IPR005491); BEST Arabidopsis thaliana protein match is: Emsy N Terminus (ENT)/ plant Tudor-like domains-containing …	EML4	Nterm	MDCKSSDSSGTDDDLPPSHRVPRGGGGGRGGRVAGNGRPLNLPPSYPKMYDDLAADMEAQIHQIEKEAYISVLRAFKAQGDAISWEKESVITELRKELSLSNEEHRELLGRVNSDDTIRRIREWRQSGGMQPSMRNAAQVVHDTLPSPSVSASMKTHKPNQPIPSQPFASSSPSFHPQADPTHPFASSTAKRGPVPIVKGKKHKPVFPGSSSTKHAPYHPSDQPPRGQVMNRLPSVPASSSEPTNGIDPESFLGRRVRTKWPEDNTFYDAIITQYNPVEGRHALVYDIATPSETWEWVRLSEISPGDIEWIGEDPGLGNRYNGQGHGLNRTTGPNCVPQRGSGLEKNTIRKGFRTSQNGTGKKKHLDIRIRQTDVLIREVERVLRSHNPDPYEVERAKR…	G
45797	-4.07546	3	2005871	2005895	3	8.3	90	43	0.438104	CCA	0.666667	0.333333	0.407407	0.540741	45797	AT3G06490	AT3G06490.1	putative transcription factor MYB108 (MYB108) mRNA,	MYB108	multiple strs	MDEKGRSLKNNNMEDEMDLKRGPWTAEEDFKLMNYIATNGEGRWNSLSRCAGLQRTGKSCRLRWLNYLRPDVRRGNITLEEQLLILELHSRWGNRWSKIAQYLPGRTDNEIKNYWRTRVQKHAKQLKCDVNSQQFKDTMKYLWMPRLVERIQSASASSAAAATTTTTTTTGSAGTSSCITTSNNQFMNYDYNNNNMGQQFGVMSNNDYITPENSSVAVSPASDLTEYYSAPNPNPEYYSGQMGNSYYPDQNLVSSQLLPDNYFDYSGLLDEDLTAMQEQSNLSWFENINGAASSSDSLWNIGETDEEFWFLQQQQQFNNNGSF	T
46915	-4.07245	3	3910755	3910778	3	8.3	90	43	0.438104	AGG	0.666667	0.529412	0.5	0.42963	46915	AT3G12270	AT3G12270.1	protein arginine methyltransferase 3 (PRMT3); FUNCTIONS IN: protein methyltransferase activity, methyltransferase activity, zinc ion binding; INVOLVED IN: protein amino acid methylation; LOCATED IN: intracellular, cytoplasm; EXPRESSED IN: 21 plant structures; EXPRESSED DURING: 13 growth stages; CONTAINS InterPro DOMAIN/s: Zinc finger, C2H2-like (InterPro:IPR015880), Ribosomal L11 methyltransferas…	PRMT3	E/G	MAATMVKHEILNYSEDEEENYSDEGDWGDWKADDNGIEGGEEEEEDDGDDSESDFLCLFCDSHFVSCDLLFEHCRLSHGFDFHGVRKELKLDFYSSFKLINYIRSQVAENMCFSWKIEADDYKDVKFPWDEEKYLKPFWQEDSLLYSFADDEEDEEVTFDREEVMEELQKLGDLSIDVEALGESSMSNSDKCNINGSKDVTSLSNCNGLKQSSADDLIVNGKDAEPKVCDGRLVNRNIRKVNENYFGSYSSFGIHREMLSDKVRTEAYRDALLKNPTLLNGSVVMDVGCGTGILSLFAAKAGASRVVAVEASEKMAKVATKIAKDNKVFNDNEHNGVLEVAHSMVEELDKSIQIQPHSVDVLVSEWMGYCLLYESMLSSVLYARDRWLKPGGAILPDTA…	E
73208	-4.07046	4	6567477	6567501	3	8.3	90	43	0.438104	AGG	0.666667	0.352941	0.5	0.496296	73208	AT4G10630	AT4G10630.1	Glutaredoxin family protein; FUNCTIONS IN: electron carrier activity, protein disulfide oxidoreductase activity; INVOLVED IN: N-terminal protein myristoylation, cell redox homeostasis; LOCATED IN: cellular_component unknown; CONTAINS InterPro DOMAIN/s: Thioredoxin fold (InterPro:IPR012335), Glutaredoxin (InterPro:IPR002109), Thioredoxin-like fold (InterPro:IPR012336); BEST Arabidopsis thaliana pr…	N/A		MGCVSSNLLNHDEDFSQIGGGSSAFGHHIVKLTSTTYGLLTLDPPPPPSPPMTPPEKFTVDTKSKSIWSEPRVIKSEPEIINSWELMSGLDGESFRFTPLPKTPVKYKVFGGENKENSDPSRRNPRKNLNDEVLKPLDLNREDSDSNSRSPRKSFKPLDLKLDEKFERICPPGGENRVVMYTTSLRGVRQTFEACNAVRAAVESFGVVVCERDVSMDRRFREELVSLMAKRVGDEGVAALPPRVFVKGRYIGGGEEVLRLVEEGSFGELISGIPRKKAGGCESGACDGCGGLFFLPCFRCNGSCKMVKGWGSASVVVRCNECNENGLVPCPICS	P
4208	-4.0547	1	6834122	6834141	3	6.7	100	40	0.303382	TTC	0.333333	0.625	0.413793	0.362963	4208	AT1G19780	AT1G19780.1	member of Cyclic nucleotide gated channel family	CNGC8		MYKSQYISGHREKFVRLDDTDSRVSMSSNATGMKKRSCFGLFNVTSRGGGKTKNTSKSFREGVKIGSEGLKTIGKSFTSGVTRAVFPEDLRVSEKKIFDPQDKTLLLWNRMFVISCILAVSVDPLFFYLPIVDNSKNCIGIDSKLAVTTTTLRTIIDVFYLTRMALQFRTAYIAPSSRVFGRGELVIDPAKIAERYLTRYFIVDFLAVLPLPQIAVWKFLHGSKGTDVLPTKQALLHIVITQYIPRFVRFIPLTSELKKTAGAFAEGAWAGAAYYLLWYMLASHITGAFWYMLSVERNDTCLRSACKVQPDPKVCVQILYCGSKLMSSRETDWIKSVPDLFKNNCSAKSDESKFNYGIYSQAVSSGIVSSTTFFSKFCYCLWWGLQNLSTLGQGLQTST…	E
97476	-3.94867	5	16580921	16580940	3	6.7	100	40	0.303382	GAT	0.333333	0.444444	0.521739	0.395683	97476	AT5G41410	AT5G41410.1	Homeodomain protein required for ovule identity.Loss of function mutations show homeotic conversion of integuments to carpels.Forms heterodimers with STM and KNAT1. Interacts with AG-SEP heterodimers is thought to restrict WUS expression. BEL interacts with MADS box dimers composed of SEP1(or SEP3) and AG, SHP1, SHP2 and STK. The interaction of BEL1 with AG-SEP3 is required for proper integument …	BEL1	weird protein, many short strs	MARDQFYGHNNHHHQEQQHQMINQIQGFDETNQNPTDHHHYNHQIFGSNSNMGMMIDFSKQQQIRMTSGSDHHHHHHQTSGGTDQNQLLEDSSSAMRLCNVNNDFPSEVNDERPPQRPSQGLSLSLSSSNPTSISLQSFELRPQQQQQQGYSGNKSTQHQNLQHTQMMMMMMNSHHQNNNNNNHQHHNHHQFQIGSSKYLSPAQELLSEFCSLGVKESDEEVMMMKHKKKQKGKQQEEWDTSHHSNNDQHDQSATTSSKKHVPPLHSLEFMELQKRKAKLLSMLEELKRRYGHYREQMRVAAAAFEAAVGLGGAEIYTALASRAMSRHFRCLKDGLVGQIQATSQALGEREEDNRAVSIAARGETPRLRLLDQALRQQKSYRQMTLVDAHPWRPQRGLP…	M
1360	-3.94816	1	2165087	2165113	3	8.7	92	47	0.548103	TCT	0.333333	0.375	0.413793	0.37037		AT1G07050		CCT motif family protein	N/A	E/K, Nterm	mdtqrlpkkeeeeeedhllsstfesinghsrdqhnhsiddfesifditidnlscsneltwdfweedededvgeeekrsstdqegssfgfwenkptdyedkdlglklnlnhqevidawsdhqkplwtdtstldnsvyrgevpvieekrnmrreasvlrykekrqsrlfskkiryqvrklnadkrprfkvsflflllstl	E
41916	-3.89882	2	15269875	15269894	3	6.7	100	40	0.303382	GAT	0.333333	0.375	0.571429	0.411765	41916	AT2G36390	AT2G36390.1	Encodes a starch branching enzyme (EC.2.4.1.18) similar to SBE2 from maize and rice. Expressed throughout plant tissues.	SBE2.1	Cterm	MVYTISGVRFPHLPSIKKKNSSLHSFNEDLRRSNAVSFSLRKDSRSSGKVFARKPSYDSDSSSLATTASEKLRGHQSDSSSSASDQVQSRDTVSDDTQVLGNVDVQKTEEAQETETLDQTSALSTSGSISYKEDFAKMSHSVDQEVGQRKIPPPGDGKRIYDIDPMLNSHRNHLDYRYGQYRKLREEIDKNEGGLEAFSRGYEIFGFTRSATGITYREWAPGAKAASLIGDFNNWNAKSDVMARNDFGVWEIFLPNNADGSPAIPHGSRVKIRMDTPSGIKDSIPAWIKYSVQPPGEIPYNGVYYDPPEEDKYAFKHPRPKKPTSLRIYESHVGMSSTEPKINTYANFRDDVLPRIKKLGYNAVQIMAIQEHAYYASFGYHVTNFFAPSSRFGTPDDLK…	D
212	-3.87301	1	355579	355598	3	6.7	100	40	0.303382	TCT	0.333333	0.625	0.538462	0.42029	212	AT1G02030	AT1G02030.1	C2H2-like zinc finger protein; FUNCTIONS IN: sequence-specific DNA binding transcription factor activity, zinc ion binding, nucleic acid binding; INVOLVED IN: regulation of transcription; LOCATED IN: intracellular; CONTAINS InterPro DOMAIN/s: Zinc finger, C2H2-like (InterPro:IPR015880), Zinc finger, C2H2-type (InterPro:IPR007087); BEST Arabidopsis thaliana protein match is: C2H2-like zinc finger …	ZAT1		MEERHKCKLCWKSFANGRALGGHMRSHMLIHPLPSQPESYSSSMADPGFVLQDRESETESSKKPSRKRSRLNRRSISSLRHQQSNEEGKSETARAADIKIGVQELSESCTEQEPMSSVSDAATTEEDVALSLMLLSRDKWEKEEEESDEERWKKKRNKWFECETCEKVFKSYQALGGHRASHKKKIAETDQLGSDELKKKKKKSTSSHHECPICAKVFTSGQALGGHKRSHASANNEFTRRSGIIISLIDLNLPAPSEEEEMASSVF	K
84271	-3.76497	5	3733848	3733874	3	9	91	47	0.581349	ATC	0.333333	0.4375	0.482759	0.355556	84271	AT5G11600	AT5G11600.1	unknown protein; FUNCTIONS IN: molecular_function unknown; INVOLVED IN: biological_process unknown; LOCATED IN: chloroplast; EXPRESSED IN: 20 plant structures; EXPRESSED DURING: 11 growth stages; BEST Arabidopsis thaliana protein match is: unknown protein (TAIR:AT1G19990.1); Has 1807 Blast hits to 1807 proteins in 277 species: Archae - 0; Bacteria - 0; Metazoa - 736; Fungi - 347; Plants - 385; Vi…	N/A	Cterm	MATQERPSSAKSEPRDASSSLSSRVKIDPSIKDKKKIATSSRPIMSDSKPRSSVSTVTAKSEAKPKVPINSVKTIATTSAAASLVKGKAQTTSTVVSLVKAKTTSATVSLVKGKAKREKKVYSLAGQKFDPPEEREPLRIFYESLSKQIPGSEMAEFWLMEHGMLSPEKAKRAFEKKQRKMKQIRMGTPSKSAPTFSSKAESSQRTSASKNNGLDARKKKKVVDDDDDDDDDFILSHKRRKV	D
45654	-3.76422	3	1814032	1814058	3	9	91	47	0.581349	GAA	0.333333	0.36	0.526316	0.345588	45654	AT3G06020	AT3G06020.1	A member of the FAF family proteins encoded by the FANTASTIC FOUR (FAF) genes: AT4G02810 (FAF1), AT1G03170 (FAF2), AT5G19260 (FAF3) and AT3G06020 (FAF4). FAFs have the potential to regulate shoot meristem size in Arabidopsis thaliana. FAFs can repress WUS, which ultimately leads to an arrest of meristem activity in FAF overexpressing lines.	FAF4	E/K	MATVVYQSYFESQHFEPRALRLRLSSHTNPQLSTPLKSHFQNSSIAPQDNPITINAASLPSSSPNPSSNSDTNSGSWSFLESLSNSSSNDKEKKTLPLFQSPSSRRTLSDESLALCTESLGSETGSDIIHEDMFSISSELQTMETRTTSTTSNPSRQDRKRNTMASLPPPLTSMIGFDCIEVKSHRENGRLVMMATRPPPRNRCLQDRSNGCVRLAILIDSDDHIETETKEEKEEEEEETIETVRDNEEEIPEYKEEEEEKEEEIKVKGVEKVQRSRRCIEGDRENRGFLNWESLCVATS	E
78651	-3.72954	4	13528800	13528819	3	6.7	100	40	0.303382	ACA	0.333333	0.444444	0.538462	0.470588	78651	AT4G26930	AT4G26930.1	Encodes a putative transcription factor (MYB97).	N/A		MIVYGGGASEDGEGGGVVLKKGPWTVAEDETLAAYVREYGEGNWNSVQKKTWLARCGKSCRLRWANHLRPNLRKGSFTPEEERLIIQLHSQLGNKWARMAAQLPGRTDNEIKNYWNTRLKRFQRQGLPLYPPEYSQNNHQQQMYPQQPSSPLPSQTPASSFTFPLLQPPSLCPKRCYNTAFSPKASYISSPTNFLVSSPTFLHTHSSLSSYQSTNPVYSMKHELSSNQIPYSASLGVYQVSKFSDNGDCNQNLNTGLHTNTCQLLEDLMEEAEALADSFRAPKRRQIMAALEDNNNNNNFFSGGFGHRVSSNSLCSLQGLTPKEDESLQMNTMQDEDITKLLDWGSESEEISNGQSSVITTENNLVLDDHQFAFLFPVDDDTNNLPGIC	N
78037	-3.66482	4	12486568	12486593	3	8.7	100	52	0.692832	GAC	0.666667	0.3125	0.655172	0.496296	78037	AT4G24030	AT4G24030.1	unknown protein; FUNCTIONS IN: molecular_function unknown; INVOLVED IN: biological_process unknown; LOCATED IN: endomembrane system; Has 4 Blast hits to 4 proteins in 2 species: Archae - 0; Bacteria - 0; Metazoa - 0; Fungi - 0; Plants - 4; Viruses - 0; Other Eukaryotes - 0 (source: NCBI BLink).	N/A	Nterm	MRSGGESERTVMGFVVVVVVVVMRGGEIDAGAAFEGGEESGYYGCADPASGVVDLFHGSRRANVGGDADAFVHGFWIRLAFQKTTKKRRSWDGSIYYRNNDFEPRKCKYKYIKRLLFVRNSASGVVVS	V
46206	-3.66183	3	2670644	2670663	3	6.7	100	40	0.303382	CAA	0.333333	0.625	0.64	0.496403	46206	AT3G08790	AT3G08790.1	ENTH/VHS/GAT family protein; FUNCTIONS IN: protein transporter activity; INVOLVED IN: intracellular protein transport, intra-Golgi vesicle-mediated transport; LOCATED IN: Golgi stack, intracellular; CONTAINS InterPro DOMAIN/s: VHS (InterPro:IPR002014), GAT (InterPro:IPR004152), VHS subgroup (InterPro:IPR018205), ENTH/VHS (InterPro:IPR008942); BEST Arabidopsis thaliana protein match is: ENTH/VHS/G…	N/A		MVHPLVDRATSDMLIGPDWAMNLEICDMLNHEPGQTREVVSGIKKRLTSRTSKVQLLALTLLETIITNCGELIHMQVAEKDILHKMVKMAKRKPNIQVKEKILILIDTWQESFSGPQGRHPQYYAAYQELLRAGIVFPQRPQITPSSGQNGPSTRYPQNSRNARQEAIDTSTESEFPTLSLTEIQNARGIMDVLAEMMNAIDGNNKEGLKQEVVVDLVSQCRTYKQRVVHLVNSTSDESMLCQGLALNDDLQRLLAKHEAIASGNSMIKKEEKSKKEVPKDTTQIIDVGSSETKNGSVVAYTTNGPKIDLLSGDDFETPNADNSLALVPLGPPQPSSPVAKPDNSIVLIDMLSDNNCESSTPTSNPHANHQKVQQNYSNGFGPGHQEQSYYGQGSSAPV…	N
89091	-3.63831	5	9785821	9785842	3	7.3	100	44	0.435838	AAG	0.333333	0.5625	0.37931	0.37037	89091	AT5G27650	AT5G27650.1	Tudor/PWWP/MBT superfamily protein; CONTAINS InterPro DOMAIN/s: PWWP (InterPro:IPR000313); BEST Arabidopsis thaliana protein match is: Tudor/PWWP/MBT superfamily protein (TAIR:AT3G05430.1); Has 6717 Blast hits to 4764 proteins in 372 species: Archae - 18; Bacteria - 431; Metazoa - 2974; Fungi - 702; Plants - 445; Viruses - 136; Other Eukaryotes - 2011 (source: NCBI BLink).	N/A	multiple strs	MYKTKLIPVMNEDAVIVQQTDSIQDPKVTPDDTVVDSSGDVHEAIDDDVEASSPMELDSAVTNDARVLESERSEKDGVVGSEEEDEIKSEDVLIDKDDESSEVKEEEEEEDGSDDQSSELGSEADEKELDLGLKEEKKGVSDYKSLLSEFDDYVASEKMGSGVSRALSYGFEVGDLVWGKVKSHPWWPGHIFNEAFASPSVRRMRRIDHVLVAFFGDSSYGWFDPAELIPFEPNLEEKSQQTVSKHFVRAVEEAKDEASRRSALGLTCKCRNPYNFRPSNVEDYFAVDVPDYELQAVYSVDQIKNSRDKFLPAETISFVKQLALAPQECDPDSLKFMKKKAVVFAFRKSVFEEFDETYAQAFGTKSPRSSVSTLEPHNRAPPRAPLSGPLVIAETLGDL…	E
39513	-3.61512	2	11922991	11923011	3	7	100	42	0.37134	ATC	0.333333	0.36	0.6	0.348148	39513	AT2G27990	AT2G27990.1	Encodes a BEL1-like homeobox gene that functions together with PNY in meristem maintenance by regulating the allocation process during vegetative and reproductive development. Both gene products are required for the competence of the SAM to respond properly to floral inductive signals.	BLH8	homolog bel1 below	MDMIKPDFQQIRRDKFRVEQMNDFPNTWTQQQHQNIRIPNNLDLIGILQNQISVPVQTDLYQDSAATFMNMPQSIHRDPQGPSNWRISDLSQPSTVNHGYDQAGIRPNNVADLLSDHFSSRNQILDRPLYVGRDSIPQSSMIRRSEVSCLDDNQKGCVTVACSGTGNEILRSSYDQGSSSGSYRGEFSFLPSLENQSVAHNASNWNHGPVNVTATSHTNSKKGFPLSLLSDIPPSRDVGNAAVLSTMNIHGPLGPFTGYASILKSSRFLEPAQKMLEEFCISYASKIISRSESTSMEDDDDDDDNLSGFSSSSEPLEPKNRLKKAKLLFLQEEVCKWYKLYNHQLQTVMSSFNTVAGLNTATPYISLALKRTSRSFKALRTAIAEHVKQISSHSSNGNN…	D
47550	-3.54569	3	4995666	4995687	3	7.3	100	44	0.435838	CTT	0.333333	0.5	0.518519	0.394161	47550	AT3G14850	AT3G14850.2	Encodes a member of the TBL (TRICHOME BIREFRINGENCE-LIKE) gene family containing a plant-specific DUF231 (domain of unknown function) domain. TBL gene family has 46 members, two of which (TBR/AT5G06700 and TBL3/AT5G01360) have been shown to be involved in the synthesis and deposition of secondary wall cellulose, presumably by influencing the esterification state of pectic polymers. A nomenclature…	TBL41	Nterm	MGSKDNAISNDSALVLSLLLLLLLPLLHEAAEGCDMFTGRWVKDDSYPLYNSSTCPFIRHEFSCQRNGRPDLDYSTFRWQPLSCKLARFNGLQFLKKNKGKKIMFVGDSLSLNQWQSLACMLHSSVPNSTYTLTTQGSISTYTFKEYGLELKLDRNVYLVDIVREKIGRVLKLDSINDGKNWVEMDTLIFNTWHWWSRRGPAQPWDLIQIGTNVTKDMDRVAAFEIALGTWGKWVDTVLNTKKTRVFFQGISPSHYKGVLWGEPAAKSCVGQKEPLLGTKYPGGLPAEVGVLKRALGKISKPVTLLDITMLSLLRKDAHPSVYGLGGRNSSGDCSHWCLSGVPDTWNEILYNYMVE	L
104934	-3.51821	5	26671785	26671818	3	11.7	90	49	0.904176	TCT	0.333333	0.375	0.535714	0.433824	104934	AT5G66800	AT5G66800.1	unknown protein; BEST Arabidopsis thaliana protein match is: unknown protein (TAIR:AT3G50640.1); Has 1807 Blast hits to 1807 proteins in 277 species: Archae - 0; Bacteria - 0; Metazoa - 736; Fungi - 347; Plants - 385; Viruses - 0; Other Eukaryotes - 339 (source: NCBI BLink).	N/A		MACLEMYNSNGGGGTPMSPRISFSNDFVEIRPETTKTTRSSPLSKQEGSSSSFSDNFEFSVSNYTMMPADELFSKGKLLPFKETNQVQRTLREELLVEEDEEEGPRDATNIFSLKPPIFSSSSSSSSSSKGRWKGLLGLKRAHVGSKNNEERFVHHMINNNKQSQEAIGGREGSSCREMKKSM	S
98674	-3.48793	5	17914752	17914771	2	10	100	40	0.855577	AG	20	0.5	0.526316	0.384615	0.348148	AT5G44450	AT5G44450	alpha amino-terminal protein methyltransferase		Cterm	MSSSLHSPFVSIGHFHCHHNNQNHISPPPSTTTTLASPPYRYQQRKEIRSVLTLSSNSMDICGVDSEGKEFNSVQEMWREEIGEGDETKKTQWYRDGVSYWEGVEASVDGVLGGYGHVNDADIIGSEVFLKTLLQERLVNNVGANQHLVALDCGSGIGRITKNLLIRYFNEVDLLEPVAQFLDAARENLASAGSETHKATNFFCVPLQEFTPAAGRYDVIWVQWCIGHLTDNDFVSFFNRAKGYLKPGGFFVVKENLAKNGFVLDKEDHSITRSDPYFKQLFRQCGLHLYRTKDQKGLPQELFAVKMYALTVDTPPKIHRTRSKTRSNRPQIIK	SL
78939	-3.47607	4	14074255	14074280	3	8.7	91	45	0.530293	CAT	0.333333	0.6875	0.482759	0.518519		AT4G28480			N/A	multiple strs	MGVDYYKVLQVDRSANDDDLKKAYRKLAMKWHPDKNPNNKKDAEAKFKQISEAYDVLSDPQKRAVYDQYGEEGLKGNVPPPNAATSGASYFSTGDGSSSFRFNPRSADDIFAEFFGFSTPFGGGGGGTGGQRFASRMFGDDMYASFGEGAGGGGAMHHHHHHHHHAAARKVAPIENKLPCSLEDLYKGTTKKMKISREIVDVSGKAMQVEEILTIGVKPGWKKGTKITFPEKGNEHPGVIPADLVFIIDEKPHPVFTREGNDLIVTQKVSLADALTGYTANIATLDGRTLTIPITNVIHPEYEEVVPKEGMPLQKDQTKKGNLRIKFNIKFPARLTAEQKAGFKKLIG	H
																				terminal:	15
																			AA	count	freq
																			K	5	0.0819672
																			D	9	0.147541
																			E	16	0.262295
																			G	4	0.0655738
																			H	2	0.0327869
																			S	7	0.114754
																			Q	1	0.0163934
																			N	4	0.0655738
																			T	1	0.0163934
																			P	1	0.0163934
																			M	1	0.0163934
																			V	1	0.0163934
																			F	1	0.0163934
																			R	0	0
																			L	1	0.0163934
																			total	61	0.868852

## Sheet: g_Profiler_coding_purifying
term name	q-value	Background set	Query	Proportion of query	Proportion of background	term ID	term type
regulation of biosynthetic process	0.0446	2423	14	0.259	0.006	GO:0009889	BP
regulation of cellular biosynthetic process	0.0421	2409	14	0.259	0.006	GO:0031326	BP
regulation of RNA biosynthetic process	0.0496	2169	13	0.241	0.006	GO:2001141	BP
regulation of nucleic acid-templated transcription	0.0496	2169	13	0.241	0.006	GO:1903506	BP
regulation of transcription, DNA-templated	0.0489	2166	13	0.241	0.006	GO:0006355	BP
nuclear nucleosome	0.0103	11	2	0.037	0.182	GO:0000788	CC
nucleic acid binding	0.05	3655	18	0.333	0.005	GO:0003676	MF
actin binding	0.0272	76	3	0.056	0.039	GO:0003779	MF
				new (4/18/17)
				# signf corr. p-value T Q Q&T Q&T/Q Q&T/T term ID t type t group t name and depth in group Q&T list
				#
				1 ! 8.92e-03 2 56 2 0.036 1.000 GO:0015980 BP 1 energy derivation by oxidation of organic compounds 1 AT2G36390,AT1G19530
				1 ! 5.00e-02 4 56 2 0.036 0.500 GO:0006650 BP 2 glycerophospholipid metabolic process 1 AT2G03890,AT1G21980
				1 ! 5.00e-02 4 56 2 0.036 0.500 GO:0046488 BP 2 phosphatidylinositol metabolic process 2 AT2G03890,AT1G21980
				1 ! 8.92e-03 2 56 2 0.036 1.000 GO:0010229 BP 4 inflorescence development 1 AT2G27990,AT3G47620
				1 ! 5.00e-02 4 56 2 0.036 0.500 GO:0044815 CC 3 DNA packaging complex 1 AT3G46030,AT3G45980
				1 ! 5.00e-02 4 56 2 0.036 0.500 GO:0000786 CC 3 nucleosome 1 AT3G46030,AT3G45980
				1 ! 2.59e-02 3 56 2 0.036 0.667 GO:0000788 CC 3 nuclear nucleosome 1 AT3G46030,AT3G45980
				#INFO: PARAMETERS: user_thr = 1.00
				#INFO: PARAMETERS: sort_by_structure = 1
				#INFO: PARAMETERS: significant = 1
				#INFO: PARAMETERS: organism = athaliana
				#INFO: PARAMETERS: fdr = 1
				#INFO: User: http
				#INFO: Host: arak-prod
				#INFO: Time: 2017-4-19 1:53:48
				#INFO: Version: r1709_e87_eg34
				#WARNING: Gene AT1G02660 in background [1/12] is already seen with same internal ID GOSH:23015, skipping!
				#WARNING: Gene AT1G10720 in background [1/51] is already seen with same internal ID GOSH:30941, skipping!
				#WARNING: Gene AT1G12490 in background [1/60] is already seen with same internal ID GOSH:20302, skipping!
				#WARNING: Gene AT1G13430 in background [1/70] is already seen with same internal ID GOSH:24241, skipping!
				#WARNING: Gene AT1G18750 in background [1/94] is already seen with same internal ID GOSH:28776, skipping!
				#WARNING: Gene AT1G28000 in background [1/146] is already seen with same internal ID GOSH:14211, skipping!
				#WARNING: Gene AT1G28400 in background [1/150] is already seen with same internal ID GOSH:7459, skipping!
				#WARNING: Gene AT1G31630 in background [1/164] is already seen with same internal ID GOSH:9791, skipping!
				#WARNING: Gene AT1G43850 in background [1/186] is already seen with same internal ID GOSH:27673, skipping!
				#WARNING: Gene AT1G47970 in background [1/195] is already seen with same internal ID GOSH:11826, skipping!
				#WARNING: Gene AT1G52320 in background [1/225] is already seen with same internal ID GOSH:26226, skipping!
				#WARNING: Gene AT1G56660 in background [1/252] is already seen with same internal ID GOSH:29066, skipping!
				#WARNING: Gene AT1G56660 in background [1/253] is already seen with same internal ID GOSH:29066, skipping!
				#WARNING: Gene AT1G58210 in background [1/256] is already seen with same internal ID GOSH:27719, skipping!
				#WARNING: Gene AT1G60200 in background [1/261] is already seen with same internal ID GOSH:25205, skipping!
				#WARNING: Gene AT1G68810 in background [1/313] is already seen with same internal ID GOSH:25883, skipping!
				#WARNING: Gene AT1G69440 in background [1/324] is already seen with same internal ID GOSH:16117, skipping!
				#WARNING: Gene AT1G72390 in background [1/334] is already seen with same internal ID GOSH:10512, skipping!
				#WARNING: Gene AT1G74890 in background [1/343] is already seen with same internal ID GOSH:5663, skipping!
				#WARNING: Gene AT1G76010 in background [1/353] is already seen with same internal ID GOSH:16162, skipping!
				#WARNING: Gene AT1G77960 in background [1/368] is already seen with same internal ID GOSH:27283, skipping!
				#WARNING: Gene AT2G02070 in background [1/383] is already seen with same internal ID GOSH:29154, skipping!
				#WARNING: Gene AT2G04620 in background [1/394] is already seen with same internal ID GOSH:22103, skipping!
				#WARNING: Gene AT2G11910 in background [1/401] is already seen with same internal ID GOSH:8045, skipping!
				#WARNING: Gene AT2G12875 in background [1/403] is already seen with same internal ID GOSH:24463, skipping!
				#WARNING: Gene AT2G13570 in background [1/405] is already seen with same internal ID GOSH:15615, skipping!
				#WARNING: Gene AT2G22000 in background [1/438] is already seen with same internal ID GOSH:21574, skipping!
				#WARNING: Gene AT2G24550 in background [1/451] is already seen with same internal ID GOSH:17955, skipping!
				#WARNING: Gene AT2G26940 in background [1/472] is already seen with same internal ID GOSH:28114, skipping!
				#WARNING: Gene AT2G33880 in background [1/520] is already seen with same internal ID GOSH:24755, skipping!
				#WARNING: Gene AT2G35670 in background [1/527] is already seen with same internal ID GOSH:25167, skipping!
				#WARNING: Gene AT2G37380 in background [1/538] is already seen with same internal ID GOSH:21203, skipping!
				#WARNING: Gene AT2G37410 in background [1/540] is already seen with same internal ID GOSH:10580, skipping!
				#WARNING: Gene AT2G41260 in background [1/557] is already seen with same internal ID GOSH:14284, skipping!
				#WARNING: Gene AT2G41260 in background [1/558] is already seen with same internal ID GOSH:14284, skipping!
				#WARNING: Gene AT2G42760 in background [1/571] is already seen with same internal ID GOSH:18104, skipping!
				#WARNING: Gene AT2G43970 in background [1/574] is already seen with same internal ID GOSH:13031, skipping!
				#WARNING: Gene AT2G46020 in background [1/590] is already seen with same internal ID GOSH:29647, skipping!
				#WARNING: Gene AT3G05220 in background [1/613] is already seen with same internal ID GOSH:14684, skipping!
				#WARNING: Gene AT3G05220 in background [1/614] is already seen with same internal ID GOSH:14684, skipping!
				#WARNING: Gene AT3G06020 in background [1/617] is already seen with same internal ID GOSH:17414, skipping!
				#WARNING: Gene AT3G06180 in background [1/619] is already seen with same internal ID GOSH:8111, skipping!
				#WARNING: Gene AT3G11402 in background [1/638] is already seen with same internal ID GOSH:11692, skipping!
				#WARNING: Gene AT3G13960 in background [1/650] is already seen with same internal ID GOSH:16128, skipping!
				#WARNING: Gene AT3G17170 in background [1/666] is already seen with same internal ID GOSH:19323, skipping!
				#WARNING: Gene AT3G24080 in background [1/700] is already seen with same internal ID GOSH:23274, skipping!
				#WARNING: Gene AT3G24080 in background [1/701] is already seen with same internal ID GOSH:23274, skipping!
				#WARNING: Gene AT3G24650 in background [1/709] is already seen with same internal ID GOSH:9434, skipping!
				#WARNING: Gene AT3G26400 in background [1/721] is already seen with same internal ID GOSH:6445, skipping!
				#WARNING: Gene AT3G28790 in background [1/737] is already seen with same internal ID GOSH:12039, skipping!
				#WARNING: Gene AT3G29060 in background [1/743] is already seen with same internal ID GOSH:30020, skipping!
				#WARNING: Gene AT3G48430 in background [1/774] is already seen with same internal ID GOSH:7603, skipping!
				#WARNING: Gene AT3G49410 in background [1/780] is already seen with same internal ID GOSH:19441, skipping!
				#WARNING: Gene AT3G49430 in background [1/782] is already seen with same internal ID GOSH:26584, skipping!
				#WARNING: Gene AT3G50180 in background [1/788] is already seen with same internal ID GOSH:24569, skipping!
				#WARNING: Gene AT3G50690 in background [1/792] is already seen with same internal ID GOSH:28711, skipping!
				#WARNING: Gene AT3G51290 in background [1/796] is already seen with same internal ID GOSH:27566, skipping!
				#WARNING: Gene AT3G54220 in background [1/811] is already seen with same internal ID GOSH:15532, skipping!
				#WARNING: Gene AT3G55460 in background [1/817] is already seen with same internal ID GOSH:11276, skipping!
				#WARNING: Gene AT4G00200 in background [1/849] is already seen with same internal ID GOSH:16065, skipping!
				#WARNING: Gene AT4G02450 in background [1/859] is already seen with same internal ID GOSH:11651, skipping!
				#WARNING: Gene AT4G16630 in background [1/922] is already seen with same internal ID GOSH:22517, skipping!
				#WARNING: Gene AT4G17950 in background [1/930] is already seen with same internal ID GOSH:7168, skipping!
				#WARNING: Gene AT4G20160 in background [1/942] is already seen with same internal ID GOSH:25303, skipping!
				#WARNING: Gene AT4G25940 in background [1/963] is already seen with same internal ID GOSH:15089, skipping!
				#WARNING: Gene AT4G29020 in background [1/981] is already seen with same internal ID GOSH:10527, skipping!
				#WARNING: Gene AT4G36230 in background [1/1017] is already seen with same internal ID GOSH:14394, skipping!
				#WARNING: Gene AT4G40010 in background [1/1040] is already seen with same internal ID GOSH:27204, skipping!
				#WARNING: Gene AT5G14280 in background [1/1112] is already seen with same internal ID GOSH:26131, skipping!
				#WARNING: Gene AT5G14440 in background [1/1114] is already seen with same internal ID GOSH:19046, skipping!
				#WARNING: Gene AT5G17510 in background [1/1128] is already seen with same internal ID GOSH:22553, skipping!
				#WARNING: Gene AT5G17580 in background [1/1130] is already seen with same internal ID GOSH:7295, skipping!
				#WARNING: Gene AT5G19090 in background [1/1140] is already seen with same internal ID GOSH:30125, skipping!
				#WARNING: Gene AT5G19950 in background [1/1147] is already seen with same internal ID GOSH:11631, skipping!
				#WARNING: Gene AT5G24500 in background [1/1169] is already seen with same internal ID GOSH:26707, skipping!
				#WARNING: Gene AT5G28300 in background [1/1177] is already seen with same internal ID GOSH:9501, skipping!
				#WARNING: Gene AT5G28300 in background [1/1178] is already seen with same internal ID GOSH:9501, skipping!
				#WARNING: Gene AT5G40340 in background [1/1210] is already seen with same internal ID GOSH:29583, skipping!
				#WARNING: Gene AT5G41410 in background [1/1219] is already seen with same internal ID GOSH:19584, skipping!
				#WARNING: Gene AT5G46730 in background [1/1242] is already seen with same internal ID GOSH:20541, skipping!
				#WARNING: Gene AT5G48360 in background [1/1252] is already seen with same internal ID GOSH:18838, skipping!
				#WARNING: Gene AT5G52830 in background [1/1274] is already seen with same internal ID GOSH:31192, skipping!
				#WARNING: Gene AT5G53770 in background [1/1284] is already seen with same internal ID GOSH:5495, skipping!
				#WARNING: Gene AT5G54480 in background [1/1289] is already seen with same internal ID GOSH:15417, skipping!
				#WARNING: Gene AT5G55020 in background [1/1295] is already seen with same internal ID GOSH:11900, skipping!
				#WARNING: Gene AT5G58160 in background [1/1318] is already seen with same internal ID GOSH:13359, skipping!
				#WARNING: Gene AT5G59000 in background [1/1322] is already seen with same internal ID GOSH:20977, skipping!
				#WARNING: Gene AT5G62390 in background [1/1345] is already seen with same internal ID GOSH:30541, skipping!
				#WARNING: Gene AT5G63550 in background [1/1354] is already seen with same internal ID GOSH:11007, skipping!
				#WARNING: Gene AT5G67470 in background [1/1374] is already seen with same internal ID GOSH:27805, skipping!
				#INFO: Effective domain size for GO: 1070, threshold 0.0150874
				[ - ] Gene names and descriptions
				#INFO: QUERY: AT5G22090 N/A Protein FAF-like, chloroplastic [Source:UniProtKB/Swiss-Prot;Acc:Q0V865]
				#INFO: QUERY: AT1G19530 N/A N/A
				#INFO: QUERY: AT5G46190 N/A N/A
				#INFO: QUERY: AT4G03220 N/A Putative F-box/FBD/LRR-repeat protein At4g03220 [Source:UniProtKB/Swiss-Prot;Acc:Q9ZR09]
				#INFO: QUERY: AT3G47620 TCP14 Transcription factor TCP14 [Source:UniProtKB/Swiss-Prot;Acc:Q93Z00]
				#INFO: QUERY: AT4G36230 N/A N/A
				#INFO: QUERY: AT2G40830 RHC1A Probable E3 ubiquitin-protein ligase RHC1A [Source:UniProtKB/Swiss-Prot;Acc:O22197]
				#INFO: QUERY: AT5G48385 FRL3 FRIGIDA-like protein 3 [Source:UniProtKB/Swiss-Prot;Acc:Q67ZB3]
				#INFO: QUERY: AT4G28640 IAA11 Auxin-responsive protein IAA11 [Source:UniProtKB/Swiss-Prot;Acc:Q38829]
				#INFO: QUERY: AT1G09720 NET2B Protein NETWORKED 2B [Source:UniProtKB/Swiss-Prot;Acc:F4I131]
				#INFO: QUERY: AT3G08510 PLC2 Phosphoinositide phospholipase C 2 [Source:UniProtKB/Swiss-Prot;Acc:Q39033]
				#INFO: QUERY: AT1G16500 N/A N/A
				#INFO: QUERY: AT3G11100 N/A N/A
				#INFO: QUERY: AT1G18950 DDR4 DDT domain-containing protein DDR4 [Source:UniProtKB/Swiss-Prot;Acc:F4IDY7]
				#INFO: QUERY: AT2G03890 PI4KG7 Phosphatidylinositol 4-kinase gamma 7 [Source:UniProtKB/Swiss-Prot;Acc:Q9SI52]
				#INFO: QUERY: AT5G39740 RPL5B 60S ribosomal protein L5-2 [Source:UniProtKB/Swiss-Prot;Acc:P49227]
				#INFO: QUERY: AT3G62630 N/A N/A
				#INFO: QUERY: AT4G29180 N/A Probable LRR receptor-like serine/threonine-protein kinase At4g29180 [Source:UniProtKB/Swiss-Prot;Acc:C0LGR6]
				#INFO: QUERY: AT1G27510 EX2 Protein EXECUTER 2, chloroplastic [Source:UniProtKB/Swiss-Prot;Acc:Q94AT5]
				#INFO: QUERY: AT5G50970 N/A N/A
				#INFO: QUERY: AT5G46870 N/A N/A
				#INFO: QUERY: AT3G49610 N/A Putative B3 domain-containing protein At3g49610 [Source:UniProtKB/Swiss-Prot;Acc:Q9SCJ8]
				#INFO: QUERY: AT3G55460 SCL30 Serine/arginine-rich SC35-like splicing factor SCL30 [Source:UniProtKB/Swiss-Prot;Acc:Q8L3X8]
				#INFO: QUERY: AT2G42610 LSH10 Protein LIGHT-DEPENDENT SHORT HYPOCOTYLS 10 [Source:UniProtKB/Swiss-Prot;Acc:Q9S7R3]
				#INFO: QUERY: AT4G39010 N/A Endoglucanase 24 [Source:UniProtKB/Swiss-Prot;Acc:Q93YQ7]
				#INFO: QUERY: AT3G09850 N/A N/A
				#INFO: QUERY: AT5G48360 FH9 Formin-like protein 9 [Source:UniProtKB/Swiss-Prot;Acc:Q8GX37]
				#INFO: QUERY: AT1G21980 PIP5K1 Phosphatidylinositol 4-phosphate 5-kinase 1 [Source:UniProtKB/Swiss-Prot;Acc:Q56YP2]
				#INFO: QUERY: AT2G42480 N/A MATH domain and coiled-coil domain-containing protein At2g42480 [Source:UniProtKB/Swiss-Prot;Acc:P0DKG7]
				#INFO: QUERY: AT3G45980 H2B Histone H2B.6 [Source:UniProtKB/Swiss-Prot;Acc:O23629]
				#INFO: QUERY: AT3G07880 GDI1 Rho GDP-dissociation inhibitor 1 [Source:UniProtKB/Swiss-Prot;Acc:Q9SFC6]
				#INFO: QUERY: AT3G24535 N/A N/A
				#INFO: QUERY: AT3G46030 N/A Histone H2B.7 [Source:UniProtKB/Swiss-Prot;Acc:Q9LZT0]
				#INFO: QUERY: AT3G09760 N/A N/A
				#INFO: QUERY: AT5G06710 HAT14 Homeobox-leucine zipper protein HAT14 [Source:UniProtKB/Swiss-Prot;Acc:P46665]
				#INFO: QUERY: AT1G68360 N/A N/A
				#INFO: QUERY: AT2G44440 EML4 Protein EMSY-LIKE 4 [Source:UniProtKB/Swiss-Prot;Acc:Q08A72]
				#INFO: QUERY: AT3G06490 MYB108 Transcription factor MYB108 [Source:UniProtKB/Swiss-Prot;Acc:Q9LDE1]
				#INFO: QUERY: AT3G12270 PRMT3 Probable protein arginine N-methyltransferase 3 [Source:UniProtKB/Swiss-Prot;Acc:Q0WVD6]
				#INFO: QUERY: AT4G10630 N/A N/A
				#INFO: QUERY: AT1G19780 CNGC8 Putative cyclic nucleotide-gated ion channel 8 [Source:UniProtKB/Swiss-Prot;Acc:Q9FXH6]
				#INFO: QUERY: AT5G41410 BEL1 Homeobox protein BEL1 homolog [Source:UniProtKB/Swiss-Prot;Acc:Q38897]
				#INFO: QUERY: AT1G07050 N/A N/A
				#INFO: QUERY: AT2G36390 SBE2.1 1,4-alpha-glucan-branching enzyme 2-1, chloroplastic/amyloplastic [Source:UniProtKB/Swiss-Prot;Acc:O23647]
				#INFO: QUERY: AT1G02030 ZAT1 Zinc finger protein ZAT1 [Source:UniProtKB/Swiss-Prot;Acc:Q39092]
				#INFO: QUERY: AT5G11600 N/A N/A
				#INFO: QUERY: AT3G06020 FAF4 Protein FANTASTIC FOUR 4 [Source:UniProtKB/Swiss-Prot;Acc:Q9SFG6]
				#INFO: QUERY: AT4G26930 N/A N/A
				#INFO: QUERY: AT4G24030 N/A N/A
				#INFO: QUERY: AT3G08790 N/A N/A
				#INFO: QUERY: AT5G27650 N/A N/A
				#INFO: QUERY: AT2G27990 BLH8 BEL1-like homeodomain protein 8 [Source:UniProtKB/Swiss-Prot;Acc:Q9SJJ3]
				#INFO: QUERY: AT3G14850 TBL41 Protein trichome birefringence-like 41 [Source:UniProtKB/Swiss-Prot;Acc:F4IWA8]
				#INFO: QUERY: AT5G66800 N/A N/A
				#INFO: QUERY: AT5G44450 N/A Alpha N-terminal protein methyltransferase 1 [Source:UniProtKB/Swiss-Prot;Acc:Q5PP70]
				#INFO: QUERY: AT4G28480 N/A N/A

## Sheet: tabulate_coding_both
								AA	Proteome frequency	Purifying_SE	Purifying count	Purifying freq	Diversifying count	Diversifying freq
AA	count	freq		AA	count	freq		A	0.063	0	0	0	0	0		coding 11/30/16						coding 12/20/2016
								C	0.001	0	0	0	0	0		AA	Proteome frequency	count	Purifying_freq	freq_SE		AA	Proteome frequency	count	Purifying_freq	freq_SE
								D	0.084	0.0418273	12	0.157895	1	0.047619		A	0.063	0	0	0		A	0.063	0	0	0
								E	0.158	0.0487674	18	0.236842	4	0.190476		C	0.001	0	0	0		C	0.001	0	0	0
								F	0.012	0.013071	1	0.0131579	0	0		D	0.084	10	0.163934	0.0474013		D	0.084	9	0.160714	0.0490781
								G	0.11	0.0331706	7	0.0921053	3	0.142857		E	0.158	17	0.278689	0.0574058		E	0.158	16	0.285714	0.0603682		AA	count	freq
								H	0.027	0.0223358	3	0.0394737	1	0.047619		F	0.012	1	0.0163934	0.0162585		F	0.012	1	0.0178571	0.017697		K	5	0.0819672
								I	0.001	0	0	0	0	0		G	0.11	4	0.0655738	0.0316937		G	0.11	4	0.0714286	0.0344151		D	9	0.147541
								K	0.072	0.038775	10	0.131579	1	0.047619		H	0.027	2	0.0327869	0.0228006		H	0.027	2	0.0357143	0.0247988		E	16	0.262295
								L	0.052	0	0	0	0	0		I	0.001	0	0	0		I	0.001	0	0	0		G	4	0.0655738
								M	0.004	0.013071	1	0.0131579	0	0		K	0.072	5	0.0819672	0.0351224		K	0.072	5	0.0892857	0.0381055		H	2	0.0327869
								N	0.05	0.0256139	4	0.0526316	2	0.0952381		L	0.052	1	0.0163934	0.0162585		L	0.052	1	0.0178571	0.017697		S	7	0.114754
								P	0.104	0.0256139	4	0.0526316	0	0		M	0.004	1	0.0163934	0.0162585		M	0.004	1	0.0178571	0.017697		Q	1	0.0163934
total	21	1						Q	0.058	0.0183616	2	0.0263158	1	0.047619		N	0.05	5	0.0819672	0.0351224		N	0.05	4	0.0714286	0.0344151		N	4	0.0655738
								R	0.021	0	0	0	0	0		P	0.104	2	0.0327869	0.0228006		P	0.104	1	0.0178571	0.017697		T	1	0.0163934
								S	0.334	0.0403583	11	0.144737	6	0.285714		Q	0.058	1	0.0163934	0.0162585		Q	0.058	1	0.0178571	0.017697		P	1	0.0163934
								T	0.035	0.0183616	2	0.0263158	2	0.0952381		R	0.021	1	0.0163934	0.0162585		R	0.021	0	0	0		M	1	0.0163934
								V	0.011	0.013071	1	0.0131579	0	0		S	0.334	8	0.131148	0.0432203		S	0.334	8	0.142857	0.046761		V	1	0.0163934
								W	0	0	0	0	0	0		T	0.035	1	0.0163934	0.0162585		T	0.035	1	0.0178571	0.017697		F	1	0.0163934
								Y	0	0	0	0	0	0		V	0.011	1	0.0163934	0.0162585		V	0.011	1	0.0178571	0.017697		R	0	0
										total	76		21			W	0	0	0	0		W	0	0	0	0		L	1	0.0163934
																Y	0	0	0	0		Y	0	0	0	0		total	56	0.868852
																total	1.197	61	0.967213			total	1.197	56	1
																	1.118						1.118

## Sheet: selxn_analyzed
str	location	gene	intr_F	intr_R	splice_F
25619	intron_MISANNOTATED	AT1G79970	NA	NA
6396	intron	AT1G28200	GAA ACA GCA GCA TCT GCT ACA	CGA TGG ATT CGG TGA AGG ATA C	GAA GTA CCA CCT TGT AAT AGC TCC A
7358	intron	AT1G31070	DONE	see expansion

## Sheet: utr_diversifying_122016
STR_ID	Z-score	Unit.Size	Purity	N_Units	GC	scan_gc	annotation	Log(SD)	Unit.Size	X..of.Units	Purity	TRF.score	VARscore	Consensus	Size.of.Locus	annotation	chr	start	stop	transposon	gene	all_annotation	DHS	gene_name	description
19084	11.395	3	100	7.3	0.333333	0.397059	UTR	0.770312	3	7.3	100	44	0.435838	CTT	21.9	UTR	Chr1	21181668	21181689	0	AT1G56540	exon,CDS,five_prime_UTR,exon,gene,mRNA,mRNA,protein	0	N/A	N/A
25271	3.73	2	94	14.5	0.5	0.422222	UTR	0.615294	2	18.5	94	67	1.05165	TC	37	UTR	Chr1	29504552	29504587	0	AT1G78420	exon,five_prime_UTR,exon,five_prime_UTR,gene,mRNA,mRNA	1	N/A	N/A
25619	5.14065	3	91	9	0.333333	0.301471	UTR	0.73496	3	9	91	47	0.581349	TCT	27	UTR	Chr1	30082339	30082365	0	AT1G79970	gene,mRNA,mRNA,mRNA	0	N/A	N/A
2845	6.55816	2	100	7	0	0.22963	UTR	0.655919	2	11	100	44	0.954678	AT	22	UTR	Chr1	4692769	4692790	0	AT1G13680	gene,mRNA,exon,three_prime_UTR	0	N/A	N/A
3058	3.739	2	100	10	0.5	0.37037	UTR	0.719601	2	11	100	44	0.954678	AG	22	UTR	Chr1	5068581	5068602	0	AT1G14720	gene,mRNA,exon,five_prime_UTR	1	XTH28	Probable xyloglucan endotransglucosylase/hydrolase protein 28 [Source:UniProtKB/Swiss-Prot;Acc:Q38909]
3146	3.88319	2	100	9	0.5	0.426471	UTR	0.648559	2	20	100	80	0.969646	CT	40	UTR	Chr1	5199100	5199139	0	AT1G15110	gene,mRNA,exon,five_prime_UTR,mRNA,exon,five_prime_UTR,mRNA,exon,five_prime_UTR	1	PSS1	CDP-diacylglycerol--serine O-phosphatidyltransferase 1 [Source:UniProtKB/Swiss-Prot;Acc:F4HXY7]
33633	4.23444	2	93	15.5	0.5	0.4	UTR	0.716158	2	16.5	93	59	1.08306	TC	33	UTR	Chr2	6044219	6044251	1	AT2G14265	transposable_element,transposon_fragment,gene,mRNA,three_prime_UTR,exon	0	N/A	N/A
37301	4.09397	3	100	6.7	0.333333	0.348148	UTR	0.231603	3	6.7	100	40	0.303382	GAA	20.1	UTR	Chr2	9478907	9478926	0	AT2G22310	gene,mRNA,five_prime_UTR,mRNA,five_prime_UTR,exon	1	UBP4	Ubiquitin carboxyl-terminal hydrolase 4 [Source:UniProtKB/Swiss-Prot;Acc:Q8LAM0]
40529	4.07385	3	100	10.8	0.333333	0.481481	UTR	0.843275	3	10.3	100	62	0.904241	CTT	30.9	UTR	Chr2	13194214	13194244	0	AT2G31010	gene,mRNA,exon,five_prime_UTR,mRNA,exon,five_prime_UTR	0	N/A	N/A
414	5.26913	3	94	9	0.333333	0.301471	UTR	0.85138	3	13	94	71	1.04088	GAA	39	UTR	Chr1	641971	642008	0	AT1G08815	gene,transcript_region,exon	0	N/A	N/A
42965	4.29945	3	90	9.3	0.333333	0.385185	UTR	0.614731	3	8.3	90	43	0.438104	AAC	24.9	UTR	Chr2	16824348	16824372	0	AT2G40270	gene,mRNA,exon,five_prime_UTR,mRNA,exon,five_prime_UTR	1	N/A	Inactive receptor-like serine/threonine-protein kinase At2g40270 [Source:UniProtKB/Swiss-Prot;Acc:Q9SIZ4]
43048	4.77183	3	94	9.3	0.333333	0.338235	UTR	0.803502	3	12.3	94	67	0.999768	TTC	36.9	UTR	Chr2	16925770	16925806	0	AT2G40520	exon,three_prime_UTR,exon,three_prime_UTR,exon,three_prime_UTR,gene,mRNA,mRNA,mRNA,mRNA,mRNA,mRNA	0	N/A	N/A
43538	4.89082	2	90	22.5	0.5	0.444444	UTR	0.665284	2	28.5	90	93	0.88579	TC	57	UTR	Chr2	17701356	17701411	1	AT2G42500	gene,mRNA,mRNA,mRNA,mRNA,mRNA,exon,five_prime_UTR,transposable_element,transposon_fragment,gene,mRNA,exon,five_prime_UTR	1	PP2A4	Serine/threonine-protein phosphatase PP2A-4 catalytic subunit [Source:UniProtKB/Swiss-Prot;Acc:Q07100]
44124	3.91569	2	100	10.5	0.5	0.433824	UTR	0.766063	2	10.5	100	42	0.908802	TC	21	UTR	Chr2	18779484	18779504	0	AT2G45570	gene,mRNA,three_prime_UTR,exon	1	CYP76C2	Cytochrome P450 76C2 [Source:UniProtKB/Swiss-Prot;Acc:O64637]
45525	4.08932	2	100	21	0.5	0.397059	UTR	0.807283	2	21	100	84	0.930793	GA	42	UTR	Chr3	1514898	1514939	1	AT3G05320	gene,mRNA,mRNA,exon,five_prime_UTR,mRNA,exon,five_prime_UTR,transposable_element,transposon_fragment	0	N/A	N/A
45871	7.14802	2	100	23.5	0.5	0.467153	UTR	0.771246	2	25.5	100	102	0.812059	TC	51	UTR	Chr3	2132845	2132895	1	AT3G06760	gene,mRNA,five_prime_UTR,exon,mRNA,five_prime_UTR,exon,transposable_element,transposon_fragment	1	DI19-4	Protein DEHYDRATION-INDUCED 19 homolog 4 [Source:UniProtKB/Swiss-Prot;Acc:Q8VXU6]
51238	4.54894	3	90	8	0.333333	0.407407	UTR	0.449693	3	8	90	41	0.379879	TTC	24	UTR	Chr3	10017494	10017516	0	AT3G27160	gene,mRNA,mRNA,five_prime_UTR,exon	1	N/A	N/A
58651	5.6816	3	100	6	0.333333	0.397059	UTR	0.386131	3	10	100	60	0.870827	AGA	30	UTR	Chr3	15666247	15666276	0	AT3G43810	mRNA,mRNA,exon,five_prime_UTR,protein,protein,gene,mRNA	0	CAM7	Calmodulin-7 [Source:UniProtKB/Swiss-Prot;Acc:P59220]
62492	4.79527	3	100	7.7	0.333333	0.385185	UTR	0.470567	3	17.7	100	106	1.07941	GAA	53.1	UTR	Chr3	19679175	19679227	0	AT3G53090	gene,mRNA,five_prime_UTR,exon,mRNA,five_prime_UTR,exon	0	UPL7	E3 ubiquitin-protein ligase UPL7 [Source:UniProtKB/Swiss-Prot;Acc:Q9SCQ2]
63088	4.37279	3	100	7	0.333333	0.375	UTR	0.265974	3	7	100	42	0.37134	ACA	21	UTR	Chr3	20648968	20648988	0	AT3G55660	gene,mRNA,three_prime_UTR,exon,mRNA,three_prime_UTR,exon	0	ROPGEF6	Rop guanine nucleotide exchange factor 6 [Source:UniProtKB/Swiss-Prot;Acc:Q9M056]
64611	7.47098	2	100	26	0.5	0.431655	UTR	0.718025	2	31.5	100	126	0.96373	GA	63	UTR	Chr3	23031087	23031149	0	AT3G62220	gene,mRNA,mRNA,exon,five_prime_UTR,mRNA,exon,five_prime_UTR	1	N/A	N/A
74867	3.98637	3	100	7.7	0.333333	0.338235	UTR	0.408391	3	10.7	100	64	0.944588	TCT	32.1	UTR	Chr4	8195905	8195936	1	AT4G14220	transposable_element,transposon_fragment,gene,mRNA,five_prime_UTR,exon	1	RHF1A	E3 ubiquitin-protein ligase RHF1A [Source:UniProtKB/Swiss-Prot;Acc:Q4TU14]
77933	7.97001	3	100	8	0.333333	0.444444	UTR	0.865758	3	8	100	48	0.573207	TGA	24	UTR	Chr4	12336368	12336391	0	AT4G23680	three_prime_UTR,exon,gene,mRNA	0	N/A	N/A
7966	5.41594	3	91	8	0.333333	0.207407	UTR	0.51465	3	8	91	43	0.399598	TGT	24	UTR	Chr1	11675274	11675298	0	AT1G32360	gene,mRNA,exon,three_prime_UTR	0	N/A	Zinc finger CCCH domain-containing protein 12 [Source:UniProtKB/Swiss-Prot;Acc:Q9LQM3]
80386	8.72294	3	100	7.5	0.333333	0.311111	UTR	0.662965	3	7	100	42	0.37134	TGT	21	UTR	Chr4	16422179	16422199	0	AT4G34320	gene,mRNA,mRNA,five_prime_UTR,exon	0	N/A	UPF0496 protein At4g34320 [Source:UniProtKB/Swiss-Prot;Acc:Q9SYZ7]
81607	9.03796	3	100	6	0.333333	0.318519	UTR	0.633746	3	7	100	42	0.37134	AGA	21	UTR	Chr4	18243655	18243675	0	AT4G39170	gene,mRNA,exon,three_prime_UTR,mRNA,exon,three_prime_UTR	0	SFH6	Phosphatidylinositol/phosphatidylcholine transfer protein SFH6 [Source:UniProtKB/Swiss-Prot;Acc:F4JVA6]
81794	4.21173	2	94	13	0.5	0.42963	UTR	0.720109	2	19	94	69	1.03897	GA	38	UTR	Chr4	18542659	18542696	0	AT4G09985	gene,antisense_lncRNA,exon,gene,mRNA,five_prime_UTR,exon	0	N/A	Natural antisense transcript overlaps with AT4G39990
82777	5.65429	2	92	13.5	0.5	0.385185	UTR	0.817578	2	13.5	92	47	1.02035	CT	27	UTR	Chr5	1445118	1445143	0	AT5G04930	gene,mRNA,five_prime_UTR,exon	1	ALA1	Phospholipid-transporting ATPase 1 [Source:UniProtKB/Swiss-Prot;Acc:P98204]
82824	3.87439	2	95	21	0.5	0.362963	UTR	0.762237	2	21	95	77	0.970406	TC	42	UTR	Chr5	1507159	1507200	1	AT5G05100	gene,mRNA,exon,five_prime_UTR,transposable_element,transposon_fragment	1	N/A	N/A
83137	6.09915	3	100	7	0.333333	0.311111	UTR	0.363828	3	7	100	42	0.37134	AGA	21	UTR	Chr5	2046826	2046846	0	AT5G06660	gene,mRNA,five_prime_UTR,exon	1	N/A	N/A
83936	4.26503	2	100	4.5	0	0.193548	UTR	0.626748	2	11.5	100	46	0.993576	TA	23	UTR	Chr5	3142761	3142783	0	AT5G10030	gene,mRNA	0	TGA4	Transcription factor TGA4 [Source:UniProtKB/Swiss-Prot;Acc:Q39162]
84110	7.57573	3	100	6.7	0.666667	0.496296	UTR	0.618177	3	6.7	100	40	0.303382	AGG	20.1	UTR	Chr5	3433738	3433757	0	AT5G10880	gene,mRNA,exon,CDS,protein,gene,mRNA,three_prime_UTR,exon	0	N/A	N/A
84219	4.48709	3	97	16.7	0.333333	0.311111	UTR	0.772271	3	16.7	97	95	1.10249	GTT	50.1	UTR	Chr5	3633463	3633513	0	AT5G11380	gene,mRNA,exon,three_prime_UTR,mRNA,mRNA,three_prime_UTR,mRNA,exon,three_prime_UTR	1	N/A	N/A
8749	3.69989	2	100	10	0.5	0.392593	UTR	0.717068	2	10	100	40	0.855577	GA	20	UTR	Chr1	12361150	12361169	0	AT1G34010	gene,mRNA,exon,five_prime_UTR,mRNA,CDS,exon,mRNA,exon,five_prime_UTR,protein	0	N/A	N/A
87626	9.50883	3	100	7	0.333333	0.37037	UTR	0.581016	3	9	100	54	0.738874	GAA	27	UTR	Chr5	8547605	8547631	1	AT5G24870	gene,mRNA,exon,five_prime_UTR,mRNA,exon,five_prime_UTR,transposable_element,transposon_fragment	1	N/A	N/A
95706	4.18734	3	100	8	0.333333	0.340741	UTR	0.527027	3	7	100	42	0.37134	TCA	21	UTR	Chr5	15004737	15004757	0	AT5G37780	gene,mRNA,three_prime_UTR,exon,mRNA,mRNA,mRNA,three_prime_UTR,exon	0	CAM4	Calmodulin-1 [Source:UniProtKB/Swiss-Prot;Acc:P0DH95]
97248	4.82545	3	100	6.3	0.333333	0.408759	UTR	0.29966	3	9.3	100	56	0.78188	CTT	27.9	UTR	Chr5	16339929	16339956	0	AT5G40810	gene,mRNA,exon,five_prime_UTR,mRNA,exon,five_prime_UTR	1	CYC12	Cytochrome c1 2, heme protein, mitochondrial [Source:UniProtKB/Swiss-Prot;Acc:Q9FKS5]
97512	5.03876	3	100	7.3	0.333333	0.364286	UTR	0.358648	3	7.3	100	44	0.435838	GAA	21.9	UTR	Chr5	16630726	16630747	0	AT5G41580	exon,five_prime_UTR,gene,mRNA	0	PIAL2	E4 SUMO-protein ligase PIAL2 [Source:UniProtKB/Swiss-Prot;Acc:F4JYG0]
99330	3.90438	3	100	7	0.333333	0.325926	UTR	0.234262	3	7	100	42	0.37134	TTC	21	UTR	Chr5	18630621	18630641	0	AT5G45940	gene,mRNA,mRNA,exon,five_prime_UTR,mRNA,exon,five_prime_UTR	0	NUDT11	Nudix hydrolase 11 [Source:UniProtKB/Swiss-Prot;Acc:Q8LET2]

## Sheet: intr_diversifying_122016
ID	Z-score	Unit.Size	Purity	N_Units	GC	scan_gc	annotation	Log(SD)	Unit.Size	X..of.Units	Purity	TRF.score	VARscore	Consensus	Size.of.Locus	annotation	chr	start	stop	transposon	gene	all_annotation	DHS	name	description
100158	4.80427	2	100	5.5	0	0.169118	intron	0.530662	2	11.5	100	46	0.993576	TA	23	intron	Chr5	19686289	19686311	0	AT5G48560	gene,mRNA,mRNA,protein,protein	1	BHLH78	Transcription factor bHLH78 [Source:UniProtKB/Swiss-Prot;Acc:Q9FJL4]
15383	5.30673	3	100	19.8	0.333333	0.355556	intron	0.994672	3	14.3	100	86	1.12285	TTG	42.9	intron	Chr1	17118587	17118629	0	AT1G45191	gene,mRNA,mRNA,mRNA,mRNA,mRNA,mRNA,protein,protein,protein,protein	0	BGLU1	Beta-glucosidase 1 [Source:UniProtKB/Swiss-Prot;Acc:Q3ECW8]
16815	4.01572	2	100	7.5	0	0.220588	intron	0.565662	2	11.5	100	46	0.993576	AT	23	intron	Chr1	18577304	18577326	0	AT1G50140	gene,mRNA,mRNA,mRNA,mRNA,mRNA,protein,protein,protein,protein,protein	0	N/A	N/A
20170	3.93155	2	100	5	0	0.304348	intron	0.512047	2	11	100	44	0.954678	AT	22	intron	Chr1	22469114	22469135	0	AT1G60995	gene,mRNA,protein	0	N/A	N/A
23825	4.19258	2	93	21	0.5	0.437037	intron	0.708505	2	17	93	61	1.07967	CT	34	intron	Chr1	27353283	27353316	0	AT1G72650	gene,mRNA,mRNA,protein,protein	0	N/A	N/A
25646	3.93576	2	100	6	0	0.259259	intron	0.437025	2	17	100	68	1.07348	TA	34	intron	Chr1	30134291	30134324	0	AT1G80100	gene,mRNA,mRNA,mRNA,protein,protein,protein	0	AHP6	Pseudo histidine-containing phosphotransfer protein 6 [Source:UniProtKB/Swiss-Prot;Acc:Q9SSC9]
299	5.17129	2	94	16	0	0.257353	intron	0.736569	2	19	94	69	1.03897	AT	38	intron	Chr1	505763	505800	0	AT1G02460	gene,mRNA,protein	1	N/A	N/A
36745	5.27299	2	92	21.5	0.5	0.408759	intron	0.749388	2	26.5	92	92	0.872266	GA	53	intron	Chr2	8740310	8740362	1	AT2G20280	gene,mRNA,protein,transposable_element,transposon_fragment	0	N/A	Zinc finger CCCH domain-containing protein 21 [Source:UniProtKB/Swiss-Prot;Acc:Q9SK74]
44040	3.70154	2	100	6	0	0.2	intron	0.421473	2	11	100	44	0.954678	TA	22	intron	Chr2	18600559	18600580	0	AT2G45110	gene,mRNA,protein	0	EXPB4	Expansin-B4 [Source:UniProtKB/Swiss-Prot;Acc:Q9SHD1]
44831	5.34946	3	100	6.7	0.333333	0.274074	intron	0.304614	3	6.7	100	40	0.303382	AAC	20.1	intron	Chr3	301682	301701	0	AT3G01850	gene,mRNA,mRNA,protein,protein	0	N/A	N/A
45122	3.69275	2	100	6.5	0	0.237037	intron	0.433216	2	12.5	100	50	1.05197	TA	25	intron	Chr3	843881	843905	0	AT3G03530	gene,mRNA,protein	0	NPC4	Non-specific phospholipase C4 [Source:UniProtKB/Swiss-Prot;Acc:Q9SRQ7]
52977	4.27439	3	100	6.7	0.333333	0.323529	intron	0.241255	3	6.7	100	40	0.303382	AAC	20.1	intron	Chr3	11264440	11264459	0	AT3G29350	gene,mRNA,protein	0	AHP2	Histidine-containing phosphotransfer protein 2 [Source:UniProtKB/Swiss-Prot;Acc:Q9ZNV8]
5792	4.529	2	92	8.5	0.5	0.407407	intron	0.612888	2	14.5	92	51	1.05688	AG	29	intron	Chr1	9023890	9023918	0	AT1G26100	gene,mRNA,protein	1	CYB561D	Probable transmembrane ascorbate ferrireductase 4 [Source:UniProtKB/Swiss-Prot;Acc:Q9C540]
58132	13.0426	2	100	28.5	0	0.212903	intron	1.00684	2	13.5	100	54	1.08711	TA	27	intron	Chr3	15224124	15224150	0	AT3G43270	gene,mRNA,protein	0	PME32	Probable pectinesterase/pectinesterase inhibitor 32 [Source:UniProtKB/Swiss-Prot;Acc:Q9LXK7]
61022	6.56862	2	95	24.5	0.5	0.42963	intron	0.72562	2	25.5	95	95	0.85203	GA	51	intron	Chr3	17678486	17678536	0	AT3G47910	gene,mRNA,mRNA,protein,protein	1	N/A	N/A
61673	3.89677	4	100	6.2	0.25	0.377778	intron	0.331596	4	6.2	100	50	0.191715	TCTT	24.8	intron	Chr3	18578451	18578475	0	AT3G50100	gene,mRNA,protein	0	SDN1	Small RNA degrading nuclease 1 [Source:UniProtKB/Swiss-Prot;Acc:A3KPE8]
6339	3.72513	3	100	7.3	0.333333	0.333333	intron	0.274719	3	8.3	100	50	0.6266	GAA	24.9	intron	Chr1	9774378	9774402	0	AT1G28040	protein,gene,mRNA	0	ATL20	RING-H2 finger protein ATL20 [Source:UniProtKB/Swiss-Prot;Acc:Q9C7E9]
6396	6.16727	3	100	7.3	0.333333	0.408759	intron	0.435485	3	7.3	100	44	0.435838	GAA	21.9	intron	Chr1	9851859	9851880	0	AT1G28200	gene,mRNA,mRNA,protein,protein	0	FIP1	GEM-like protein 1 [Source:UniProtKB/Swiss-Prot;Acc:Q9SE96]
7358	6.09738	3	91	8.7	0.333333	0.288889	intron	0.745882	3	8.7	91	45	0.530293	TTC	26.1	intron	Chr1	11087597	11087622	0	AT1G31070	gene,mRNA,mRNA,protein,protein	0	GLCNAC1PUT1	UDP-N-acetylglucosamine diphosphorylase 1 [Source:UniProtKB/Swiss-Prot;Acc:Q940S3]
76199	3.71947	2	100	6	0	0.266667	intron	0.420319	2	12	100	48	1.02588	AT	24	intron	Chr4	9985391	9985414	0	AT4G17990	gene,mRNA,mRNA,protein,protein	0	N/A	UPF0725 protein At4g17990 [Source:UniProtKB/Swiss-Prot;Acc:O49698]
76533	6.84335	2	92	13.5	0.5	0.37037	intron	0.9154	2	14.5	92	51	1.05688	TC	29	intron	Chr4	10417310	10417338	0	AT4G19020	gene,mRNA,mRNA,protein,protein	0	CMT2	DNA (cytosine-5)-methyltransferase CMT2 [Source:UniProtKB/Swiss-Prot;Acc:Q94F87]
8420	4.17267	3	100	5.7	0.333333	0.362963	intron	0.300075	3	7.7	100	46	0.516554	TGT	23.1	intron	Chr1	12030151	12030173	0	AT1G33170	gene,mRNA,protein	0	N/A	Probable methyltransferase PMT18 [Source:UniProtKB/Swiss-Prot;Acc:Q9C884]
														consensuss
														AAC	AG	AT	CT	GA	GAA	TA	TC	TGT	TTC	TTG	TCTT	all
														2	1	4	1	2	2	5	1	1	1	1	1	22
														TA/AT	9
														AAC/GTT	4
														AG/CT	5
														GAA/TTC	3
														TCTT	1
														all	22

## Sheet: utr_purifying_122016
ID	Z-score	Unit.Size	Purity	N_units	Unit_GC	scan_gc	annotation[names(allzs),	Log(SD)	Unit.Size	X..of.Units	Purity	TRF.score	VARscore	Consensus	Size.of.Locus	annotation	chr	start	stop	transposon	gene	all_annotation	DHS	gene	name	description
103010	-4.33261	3	90	8	0.333333	0.408759	UTR	-0.30103	3	8	90	41	0.379879	TCT	24	UTR	Chr5	23733503	23733526	0	AT5G58760	gene,mRNA,CDS,exon,mRNA,exon,five_prime_UTR,protein	1	AT5G58760	DDB2	Protein DAMAGED DNA-BINDING 2 [Source:UniProtKB/Swiss-Prot;Acc:Q6NQ88]
103274	-4.24233	3	91	8.3	0.333333	0.42029	UTR	-0.220359	3	8.3	91	40	0.457624	TTC	24.9	UTR	Chr5	24140428	24140454	0	AT5G59950	gene,mRNA,mRNA,mRNA,mRNA,five_prime_UTR,exon,mRNA,protein,protein,protein,protein	0	AT5G59950	ALY1	THO complex subunit 4A [Source:UniProtKB/Swiss-Prot;Acc:Q8L773]
104057	-4.11879	4	95	6.2	0.25	0.340741	UTR	-0.220359	4	6.2	95	43	0.0798214	AGAA	24.8	UTR	Chr5	25254251	25254275	0	AT5G62920	gene,mRNA,exon,five_prime_UTR	1	AT5G62920	ARR6	Two-component response regulator ARR6 [Source:UniProtKB/Swiss-Prot;Acc:Q9ZWS6]
104910	-3.51949	3	91	8.3	0.333333	0.325926	UTR	-0.161832	3	8.3	91	45	0.457624	AAG	24.9	UTR	Chr5	26608762	26608787	0	AT5G66658	gene,mRNA,exon,three_prime_UTR	0	AT5G66658	N/A	N/A
105092	-4.32434	2	100	9.5	0	0.188406	UTR	0.218303	2	10.5	100	42	0.908802	AT	21	UTR	Chr5	26905603	26905623	0	AT5G67420	gene,mRNA,exon,five_prime_UTR,mRNA,exon,five_prime_UTR	1	AT5G67420	LBD37	LOB domain-containing protein 37 [Source:UniProtKB/Swiss-Prot;Acc:Q9FN11]
2296	-3.80817	4	91	7	0	0.259259	UTR	-0.30103	4	7	91	42	0.217201	TAAA	28	UTR	Chr1	3878559	3878586	0	AT1G11545	gene,mRNA,three_prime_UTR,exon	0	AT1G11545	XTH8	Probable xyloglucan endotransglucosylase/hydrolase protein 8 [Source:UniProtKB/Swiss-Prot;Acc:Q8L9A9]
23169	-3.7316	2	92	13.5	0.5	0.338129	UTR	0.0400652	2	13.5	92	47	1.02035	AG	27	UTR	Chr1	26364650	26364676	0	AT1G70000	gene,mRNA,exon,five_prime_UTR,mRNA,exon,five_prime_UTR	1	AT1G70000	N/A	N/A
23682	-4.23377	3	91	8.7	0.333333	0.408759	UTR	-0.30103	3	8.7	91	45	0.530293	TTG	26.1	UTR	Chr1	27128869	27128894	0	AT1G72100	gene,mRNA,exon,three_prime_UTR	0	AT1G72100	N/A	N/A
23762	-3.79557	2	100	9.5	0.5	0.407407	UTR	0.104207	2	11.5	100	46	0.993576	CT	23	UTR	Chr1	27256978	27257000	0	AT1G72410	gene,mRNA,mRNA,exon,five_prime_UTR	1	AT1G72410	N/A	N/A
24669	-6.6607	2	100	9	0	0.274074	UTR	0.123432	2	10	100	40	0.855577	AT	20	UTR	Chr1	28708457	28708476	0	AT1G76510	gene,mRNA,three_prime_UTR,exon,mRNA,exon,three_prime_UTR	1	AT1G76510	ARID5	AT-rich interactive domain-containing protein 5 [Source:UniProtKB/Swiss-Prot;Acc:Q0WNR6]
25016	-4.3326	3	90	8	0.333333	0.410072	UTR	-0.30103	3	8	90	41	0.379879	AAG	24	UTR	Chr1	29187767	29187790	0	AT1G77660	gene,mRNA,exon,five_prime_UTR	1	AT1G77660	N/A	N/A
25820	-7.01712	2	100	9	0.5	0.308824	UTR	-0.0666566	2	10	100	40	0.855577	GT	20	UTR	Chr1	30412221	30412240	0	AT1G80940	gene,mRNA,mRNA,exon,three_prime_UTR,gene,mRNA,three_prime_UTR,exon	0	AT1G80940	N/A	N/A
3007	-4.18536	2	100	8.5	0.5	0.294964	UTR	0.119043	2	10.5	100	42	0.908802	AG	21	UTR	Chr1	4989584	4989604	0	AT1G14580	gene,mRNA,five_prime_UTR,exon,mRNA,exon,five_prime_UTR,mRNA,exon,five_prime_UTR	1	AT1G14580	IDD6	Protein indeterminate-domain 6, chloroplastic [Source:UniProtKB/Swiss-Prot;Acc:Q8RWX7]
41464	-4.51764	3	92	8.3	0.333333	0.348148	UTR	-0.158158	3	9.3	92	46	0.646654	CAT	27.9	UTR	Chr2	14548117	14548146	0	AT2G34520	gene,mRNA	0	AT2G34520	N/A	N/A
41903	-4.35446	3	90	8	0.333333	0.288889	UTR	-0.30103	3	8	90	41	0.379879	CAT	24	UTR	Chr2	15229065	15229088	0	AT2G36320	gene,mRNA,exon,five_prime_UTR	1	AT2G36320	SAP4	Zinc finger A20 and AN1 domain-containing stress-associated protein 4 [Source:UniProtKB/Swiss-Prot;Acc:Q9SJM6]
44046	-4.36209	2	100	10.5	0.5	0.378571	UTR	-0.00366522	2	10.5	100	42	0.908802	AG	21	UTR	Chr2	18620092	18620112	0	AT2G45160	gene,mRNA,exon,five_prime_UTR	1	AT2G45160	SCL27	Scarecrow-like protein 27 [Source:UniProtKB/Swiss-Prot;Acc:Q7XJM8]
44606	-3.5312	3	96	10.3	0.333333	0.377778	UTR	-0.0136262	3	10.3	96	57	0.840458	AAG	30.9	UTR	Chr2	19562990	19563021	0	AT2G47750	exon,five_prime_UTR,gene,mRNA	0	AT2G47750	GH3.9	Putative indole-3-acetic acid-amido synthetase GH3.9 [Source:UniProtKB/Swiss-Prot;Acc:O82243]
46708	-4.20563	3	90	8.3	0.333333	0.42963	UTR	-0.30103	3	8.3	90	43	0.438104	CTT	24.9	UTR	Chr3	3578455	3578479	0	AT3G11400	gene,mRNA,five_prime_UTR,exon,mRNA,five_prime_UTR,exon	1	AT3G11400	N/A	N/A
47205	-5.67564	2	100	9.5	0	0.311111	UTR	0.149189	2	11.5	100	46	0.993576	AT	23	UTR	Chr3	4498043	4498065	0	AT3G13730	gene,mRNA,three_prime_UTR,exon,mRNA,three_prime_UTR,exon	1	AT3G13730	CYP90D1	3-epi-6-deoxocathasterone 23-monooxygenase [Source:UniProtKB/Swiss-Prot;Acc:Q94IA6]
49057	-4.62594	2	100	9.5	0.5	0.313869	UTR	0.0558589	2	10.5	100	42	0.908802	GA	21	UTR	Chr3	7464983	7465003	0	AT3G21260	gene,mRNA,mRNA,mRNA,exon,five_prime_UTR,protein,protein	1	AT3G21260	GLTP3	Glycolipid transfer protein 3 [Source:UniProtKB/Swiss-Prot;Acc:Q9LU33]
58128	-3.5061	3	100	7	0	0.177778	UTR	-0.114023	3	7	100	42	0.37134	AAT	21	UTR	Chr3	15222267	15222287	0	AT3G43270	gene,mRNA,three_prime_UTR,exon	0	AT3G43270	PME32	Probable pectinesterase/pectinesterase inhibitor 32 [Source:UniProtKB/Swiss-Prot;Acc:Q9LXK7]
64896	-5.31496	2	100	9.5	0.5	0.377778	UTR	-0.00627757	2	10.5	100	42	0.908802	AG	21	UTR	Chr4	75334	75354	0	AT4G00180	gene,mRNA,exon,five_prime_UTR,mRNA,exon,five_prime_UTR	0	AT4G00180	YAB3	Axial regulator YABBY 3 [Source:UniProtKB/Swiss-Prot;Acc:Q9XFB1]
67478	-7.29255	3	100	7	0	0.244444	UTR	-0.30103	3	7	100	42	0.37134	ATT	21	UTR	Chr4	2457587	2457607	0	AT4G04850	gene,mRNA,exon,three_prime_UTR,mRNA,exon,three_prime_UTR	0	AT4G04850	KEA3	K(+) efflux antiporter 3, chloroplastic [Source:UniProtKB/Swiss-Prot;Acc:Q9M0Z3]
6770	-4.13738	2	100	9.5	0.5	0.444444	UTR	0.0725309	2	10.5	100	42	0.908802	CT	21	UTR	Chr1	10283045	10283065	0	AT1G29370	gene,mRNA,exon,five_prime_UTR	0	AT1G29370	N/A	N/A
6801	-3.7812	3	100	6.7	0.333333	0.451852	UTR	-0.30103	3	6.7	100	40	0.303382	TCA	20.1	UTR	Chr1	10327571	10327590	0	AT1G29535	gene,mRNA,exon,three_prime_UTR,mRNA,exon,three_prime_UTR,gene,mRNA,exon,CDS,protein	0	AT1G29535	N/A	N/A
72202	-4.33355	3	90	8	0.333333	0.385185	UTR	-0.30103	3	8	90	41	0.379879	TTC	24	UTR	Chr4	5803884	5803907	0	AT4G09080	gene,mRNA,exon,five_prime_UTR	0	AT4G09080	TOC75-4	Protein TOC75-4, chloroplastic [Source:UniProtKB/Swiss-Prot;Acc:Q5IZC8]
76041	-4.4149	2	100	9.5	0.5	0.4	UTR	0.0582193	2	10.5	100	42	0.908802	TC	21	UTR	Chr4	9827535	9827555	0	AT4G17650	gene,mRNA,five_prime_UTR,exon	1	AT4G17650	N/A	N/A
78569	-3.92055	3	91	8	0.333333	0.357664	UTR	-0.15169	3	8	91	43	0.399598	AGA	24	UTR	Chr4	13372300	13372324	0	AT4G26470	gene,mRNA,exon,CDS,mRNA,CDS,exon,mRNA,exon,three_prime_UTR,protein,protein	0	AT4G26470	CML21	Probable calcium-binding protein CML21 [Source:UniProtKB/Swiss-Prot;Acc:Q52K82]
79017	-4.61613	3	100	7	0.333333	0.42963	UTR	-0.30103	3	7	100	42	0.37134	AAG	21	UTR	Chr4	14199126	14199146	0	AT4G28730	gene,mRNA,five_prime_UTR,exon,mRNA,five_prime_UTR,exon	1	AT4G28730	GRXC5	Glutaredoxin-C5, chloroplastic [Source:UniProtKB/Swiss-Prot;Acc:Q8GWS0]
79259	-4.07193	3	90	8.3	0.666667	0.514706	UTR	-0.30103	3	8.3	90	43	0.438104	GGA	24.9	UTR	Chr4	14446851	14446875	0	AT4G29330	gene,mRNA,CDS,exon,mRNA,exon,three_prime_UTR,protein	0	AT4G29330	DER1	Derlin-1 [Source:UniProtKB/Swiss-Prot;Acc:Q8VZU9]
79554	-3.9659	3	92	10	0.333333	0.311111	UTR	-0.30103	3	10	92	53	0.747237	GAA	30	UTR	Chr4	14917485	14917514	0	AT4G03275	gene,transcript_region,transcript_region,exon	0	AT4G03275	N/A	N/A
79803	-5.44872	2	92	13.5	0.5	0.407407	UTR	-0.106068	2	13.5	92	47	1.02035	GA	27	UTR	Chr4	15324546	15324572	0	AT4G31620	gene,mRNA,exon,five_prime_UTR,mRNA,protein	0	AT4G31620	N/A	N/A
79999	-4.58362	2	100	10	0.5	0.474074	UTR	-0.0183119	2	10	100	40	0.855577	TC	20	UTR	Chr4	15676454	15676473	0	AT4G32480	gene,mRNA,five_prime_UTR,exon	1	AT4G32480	N/A	N/A
80226	-4.91489	3	100	7	0.333333	0.355556	UTR	-0.30103	3	7	100	42	0.37134	TCA	21	UTR	Chr4	16111144	16111164	0	AT4G33495	gene,mRNA,exon,three_prime_UTR	0	AT4G33495	RPD1	Protein ROOT PRIMORDIUM DEFECTIVE 1 [Source:UniProtKB/Swiss-Prot;Acc:Q689D6]
82178	-4.20517	3	90	8.3	0.333333	0.419118	UTR	-0.30103	3	8.3	90	43	0.438104	TCT	24.9	UTR	Chr5	577020	577044	0	AT5G02560	gene,mRNA,exon,three_prime_UTR,gene,mRNA,exon,CDS,protein	0	AT5G02560	N/A	Probable histone H2A.4 [Source:UniProtKB/Swiss-Prot;Acc:Q9LZ46]
83637	-3.49209	2	100	11	0.5	0.426471	UTR	0.0964267	2	11	100	44	0.954678	GA	22	UTR	Chr5	2666021	2666042	0	AT5G08290	gene,mRNA,five_prime_UTR,exon,mRNA,exon,five_prime_UTR	0	AT5G08290	YLS8	Thioredoxin-like protein YLS8 [Source:UniProtKB/Swiss-Prot;Acc:Q9FE62]
85884	-4.20506	3	90	8.3	0.333333	0.407407	UTR	-0.30103	3	8.3	90	43	0.438104	ATG	24.9	UTR	Chr5	6251807	6251831	0	AT5G18735	gene,mRNA,exon,CDS,protein,gene,mRNA,exon,three_prime_UTR	0	AT5G18735	N/A	N/A
86473	-4.08445	2	100	10	0.5	0.407407	UTR	0.0358384	2	11	100	44	0.954678	GA	22	UTR	Chr5	7084706	7084727	0	AT5G20885	gene,mRNA,exon,five_prime_UTR	1	AT5G20885	N/A	N/A
87131	-4.22638	3	91	8.7	0.333333	0.37037	UTR	-0.30103	3	8.7	91	45	0.530293	GAA	26.1	UTR	Chr5	7956731	7956756	0	AT5G23590	gene,mRNA,exon,five_prime_UTR,gene,mRNA,exon,three_prime_UTR	0	AT5G23590	N/A	N/A
87679	-3.83367	2	100	10	0	0.288889	UTR	0.213033	2	10	100	40	0.855577	TA	20	UTR	Chr5	8600316	8600335	0	AT5G24960	three_prime_UTR,exon,gene,mRNA,mRNA,protein	0	AT5G24960	CYP71A14	Cytochrome P450 71A14 [Source:UniProtKB/Swiss-Prot;Acc:P58045]
88181	-4.23856	2	100	9	0.5	0.444444	UTR	0.0982757	2	10	100	40	0.855577	GA	20	UTR	Chr5	9055187	9055206	0	AT5G25940	gene,mRNA,exon,five_prime_UTR	1	AT5G25940	N/A	N/A
92543	-3.73594	2	91	12	0.5	0.385185	UTR	-0.0727155	2	13	91	45	0.982079	TG	26	UTR	Chr5	12599750	12599775	0	AT5G33355	exon,three_prime_UTR,gene,mRNA	0	AT5G33355	N/A	Defensin-like protein 207 [Source:UniProtKB/Swiss-Prot;Acc:Q3E8R5]
95672	-3.7446	3	92	8.7	0.333333	0.385185	UTR	-0.137167	3	8.7	92	47	0.548103	AAG	26.1	UTR	Chr5	14984444	14984470	0	AT5G37720	gene,mRNA,mRNA	0	AT5G37720	ALY4	THO complex subunit 4D [Source:UniProtKB/Swiss-Prot;Acc:Q6NQ72]
97704	-6.81726	2	100	10	0	0.2	UTR	0.0491669	2	10	100	40	0.855577	AT	20	UTR	Chr5	16881174	16881193	0	AT5G42230	gene,mRNA,mRNA	0	AT5G42230	SCPL41	Serine carboxypeptidase-like 41 [Source:UniProtKB/Swiss-Prot;Acc:Q9FH06]
98526	-3.78394	2	100	9	0	0.140741	UTR	0.259324	2	20	100	80	0.969646	TA	40	UTR	Chr5	17757516	17757555	0	AT5G44120	gene,mRNA,mRNA,mRNA,exon,five_prime_UTR,protein,protein	0	AT5G44120	CRA1	12S seed storage protein CRA1 [Source:UniProtKB/Swiss-Prot;Acc:P15455]
98920	-4.11431	3	100	6.7	0.333333	0.345324	UTR	-0.30103	3	6.7	100	40	0.303382	AAG	20.1	UTR	Chr5	18166901	18166920	0	AT5G45000	gene,mRNA,CDS,exon,protein,gene,mRNA,three_prime_UTR,exon	0	AT5G45000	N/A	N/A
99849	-4.33301	3	90	8	0.333333	0.427536	UTR	-0.30103	3	8	90	41	0.379879	TTC	24	UTR	Chr5	19317759	19317782	0	AT5G47690	gene,mRNA,exon,five_prime_UTR,mRNA,five_prime_UTR,exon,mRNA,mRNA,five_prime_UTR,exon	1	AT5G47690	N/A	N/A

## Sheet: intr_purifying_122016
ID	Z-score	Unit.Size	Purity	N_units	Unit_GC	scan_gc	annotation[names(allzs),	Log(SD)	ID	Unit.Size	X..of.Units	Purity	TRF.score	VARscore	Consensus	Size.of.Locus	annotation	sanna.s.annotations	chr	start	stop	transposon	gene	all_annotation	DHS	gene	name	description
103582	-3.94248	2	100	10.5	0.5	0.404412	intron	0.0323186	103582	2	10.5	100	42	0.908802	TG	21	intron		Chr5	24511813	24511833	0	AT5G60920	gene,mRNA,mRNA,protein,protein	1	AT5G60920	COB	Protein COBRA [Source:UniProtKB/Swiss-Prot;Acc:Q94KT8]
1914	-3.52928	2	100	11.5	0.5	0.377778	intron	0.117638	1914	2	10.5	100	42	0.908802	AC	21	intron		Chr1	3299755	3299775	0	AT1G10095	gene,mRNA,mRNA,mRNA,mRNA,protein,protein,protein,protein	0	AT1G10095	N/A	N/A
21937	-4.4077	2	100	8.5	0	0.207407	intron	0.202022	21937	2	19.5	100	78	0.989118	AT	39	intron		Chr1	24764420	24764458	0	AT1G66390	gene,mRNA,protein	0	AT1G66390	MYB90	Transcription factor MYB90 [Source:UniProtKB/Swiss-Prot;Acc:Q9ZTC3]
22421	-5.10155	2	90	12	0.5	0.311111	intron	-0.30103	22421	2	12	90	41	0.895204	TG	24	intron		Chr1	25386618	25386641	0	AT1G67720	gene,mRNA,protein	0	AT1G67720	N/A	Probable LRR receptor-like serine/threonine-protein kinase At1g67720 [Source:UniProtKB/Swiss-Prot;Acc:C0LGI2]
25572	-4.8629	3	92	9.3	0.333333	0.294118	intron	-0.30103	25572	3	9.3	92	49	0.646654	TCT	27.9	intron		Chr1	30016147	30016174	0	AT1G79780	gene,mRNA,protein	0	AT1G79780	N/A	CASP-like protein 3A2 [Source:UniProtKB/Swiss-Prot;Acc:Q1PFB8]
25797	-5.03376	2	100	8.5	0	0.2	intron	0.170268	25797	2	14.5	100	58	1.1022	AT	29	intron		Chr1	30384287	30384315	1	AT1G80840	gene,mRNA,protein,transposable_element,transposon_fragment	0	AT1G80840	WRKY40	Probable WRKY transcription factor 40 [Source:UniProtKB/Swiss-Prot;Acc:Q9SAH7]
3809	-3.93144	2	100	11	0.5	0.392593	intron	0.0591228	3809	2	11	100	44	0.954678	AC	22	intron		Chr1	6287158	6287179	0	AT1G18270	gene,mRNA,mRNA,mRNA,mRNA,protein,protein,protein,protein	0	AT1G18270	N/A	N/A
44841	-5.99199	3	91	8	0.333333	0.426471	intron	-0.30103	44841	3	8	91	43	0.399598	AAG	24	intron		Chr3	317170	317194	0	AT3G01910	gene,mRNA,mRNA,protein	1	AT3G01910	SOX	Sulfite oxidase [Source:UniProtKB/Swiss-Prot;Acc:Q9S850]
45473	-5.5483	2	100	10	0.5	0.340741	intron	-0.0802941	45473	2	10	100	40	0.855577	CT	20	intron		Chr3	1448791	1448810	0	AT3G05155	gene,mRNA,mRNA,protein,protein	0	AT3G05155	N/A	Sugar transporter ERD6-like 9 [Source:UniProtKB/Swiss-Prot;Acc:Q7XA64]
48115	-3.46405	2	91	13	0	0.294118	intron	0.0131737	48115	2	13	91	45	0.982079	AT	26	intron		Chr3	5876189	5876214	0	AT3G17205	gene,mRNA,mRNA,mRNA,protein,protein,protein	0	AT3G17205	UPL6	E3 ubiquitin-protein ligase UPL6 [Source:UniProtKB/Swiss-Prot;Acc:Q8RWB8]
48253	-5.47305	2	100	9.5	0.5	0.357664	intron	-0.0146562	48253	2	11.5	100	46	0.993576	TG	23	intron		Chr3	6148480	6148502	0	AT3G17970	gene,mRNA,mRNA,protein,protein	0	AT3G17970	OEP64	Outer envelope protein 64, chloroplastic [Source:UniProtKB/Swiss-Prot;Acc:Q9LVH5]
48568	-3.99114	3	100	6.7	0.333333	0.382353	intron	-0.30103	48568	3	6.7	100	40	0.303382	TTC	20.1	intron		Chr3	6640106	6640125	0	AT3G19190	gene,mRNA,mRNA,mRNA,protein,protein,protein	0	AT3G19190	ATG2	Autophagy-related protein 2 [Source:UniProtKB/Swiss-Prot;Acc:F8S296]
49999	-4.27745	2	100	8	0	0.308824	intron	0.146527	49999	2	10	100	40	0.855577	TA	20	intron		Chr3	8581846	8581865	0	AT3G23800	gene,mRNA,protein	0	AT3G23800	SBP3	Selenium-binding protein 3 [Source:UniProtKB/Swiss-Prot;Acc:Q9LK38]
50060	-3.58762	2	100	10	0.5	0.362963	intron	0.0853376	50060	2	12	100	48	1.02588	CA	24	intron		Chr3	8638384	8638407	0	AT3G23910	gene,mRNA,mRNA,protein,protein	0	AT3G23910	N/A	N/A
50081	-4.34195	3	90	8	0.333333	0.330882	intron	-0.30103	50081	3	8	90	41	0.379879	GAT	24	intron		Chr3	8667356	8667379	0	AT3G23980	gene,mRNA,protein	0	AT3G23980	N/A	N/A
78024	-4.61169	4	95	6.5	0.25	0.325926	intron	-0.30103	78024	4	6.5	95	45	0.156877	TTGA	26	intron		Chr4	12480385	12480410	0	AT4G24020	gene,mRNA,mRNA,protein	0	AT4G24020	NLP7	Protein NLP7 [Source:UniProtKB/Swiss-Prot;Acc:Q84TH9]
84315	-4.98779	3	100	7	0.333333	0.338235	intron	-0.30103	84315	3	7	100	42	0.37134	TTG	21	intron		Chr5	3800524	3800544	0	AT5G11790	gene,mRNA,mRNA,protein	1	AT5G11790	N/A	N/A
86352	-3.93812	2	100	11	0	0.17037	intron	0.213192	86352	2	16	100	64	1.09435	AT	32	intron		Chr5	6949900	6949931	0	AT5G20540	gene,mRNA,protein	1	AT5G20540	BRXL4	Protein Brevis radix-like 4 [Source:UniProtKB/Swiss-Prot;Acc:Q8GZ92]
87547	-6.25472	2	100	9	0	0.26087	intron	0.142386	87547	2	23	100	92	0.861734	AT	46	intron		Chr5	8433617	8433662	0	AT5G24630	gene,mRNA,mRNA,mRNA,mRNA,mRNA,mRNA,mRNA,mRNA,mRNA,mRNA,mRNA,mRNA,protein,protein,protein,protein,protein,protein,protein,protein,protein,protein,protein,protein	0	AT5G24630	BIN4	DNA-binding protein BIN4 [Source:UniProtKB/Swiss-Prot;Acc:Q9FLU1]
99545	-3.60694	2	100	10	0.5	0.382353	intron	0.0810468	99545	2	10	100	40	0.855577	TG	20	intron		Chr5	18925278	18925297	0	AT5G46640	gene,mRNA,protein	0	AT5G46640	AHL8	AT-hook motif nuclear-localized protein 8 [Source:UniProtKB/Swiss-Prot;Acc:Q9FIR1]

[truncated: 6 more sheets: nc_diversifying_122016, nc_stab_122016, coding_diversifying_092616, intron_pure_092616, coding_purifying_092616, intron_diverse_092616]
