# Supplementary material for: Massive variation of short tandem repeats with functional consequences across strains of Arabidopsis thaliana
Source: HighWire-hosted journal article supplement (doi:10.1101/gr.231753.117), 2018-07-03
Supplement: Supplemental_File_S4.zip [file rkp_tdna_expt_012717.xlsx]

## Sheet: data
seedling_number	genotype_label	tray_number	tray_row	tray_col	treatment	DTF	RLN	notes
1	1	1	1	1		35	17
2	2	1	1	2		31	15
3	3	1	1	3		NA	NA
4	1	1	1	4		31	17
5	2	1	1	5		34	14
6	3	1	1	6		28	14
7	1	1	1	7		28	13
8	2	1	1	8		33	14
9	3	1	1	9		NA	NA
10	2	1	2	1		32	14
11	3	1	2	2		31	14
12	1	1	2	3		29	12
13	2	1	2	4		33	13	sad
14	3	1	2	5		NA	NA
15	1	1	2	6		35	14	sad
16	2	1	2	7		26	12
17	3	1	2	8		NA	NA
18	1	1	2	9		29	11	sad
19	3	1	3	1		NA	NA
20	1	1	3	2		38	15
21	2	1	3	3		33	15
22	3	1	3	4		28	13
23	1	1	3	5		NA	NA
24	2	1	3	6		32	18
25	3	1	3	7		40	16	sad
26	1	1	3	8		31	14
27	2	1	3	9		29	12
28	1	1	4	1		33	13
29	2	1	4	2		29	12
30	3	1	4	3		34	14
31	1	1	4	4		26	10
32	2	1	4	5		33	12	sad
33	3	1	4	6		31	14
34	1	1	4	7		29	13
35	2	1	4	8		34	13	sad
36	3	1	4	9		NA	NA	sad

## Sheet: mappings
		mapping of randomized keys to genotypes:
		1	121005
		2	CS834316
		3	Col
