# Supplementary material for: Massive variation of short tandem repeats with functional consequences across strains of Arabidopsis thaliana
Source: HighWire-hosted journal article supplement (doi:10.1101/gr.231753.117), 2018-07-03
Supplement: Supplemental_File_S4.zip [file str_snp_varcomp_analysis_041017.xlsx]

## Sheet: Sheet1
Locus	Sum Sq	DF	F-value	p-value
snp.1.3895353	1153.6	1	2.353	0.1316
snp.2.9581605	508.0	1	1.0362	0.3138
snp.5.19508285	191.7	1	0.391	0.5347
snp.5.25386559	39.5	1	0.0805	0.7778
STR 37359	1149.9	6	0.3909	0.8813
STR 3950	15.4	1	0.0314	0.8602
STR 43058	1338.2	5	0.5459	0.7406
STR 43970	3336.3	7	0.9721	0.4622
STR 65291	6233.0	8	1.5892	0.1531
STR 81421	4313.7	12	0.7332	0.7123
Residuals	23532.8	48
