# Supplementary material for: Massive variation of short tandem repeats with functional consequences across strains of Arabidopsis thaliana
Source: HighWire-hosted journal article supplement (doi:10.1101/gr.231753.117), 2018-07-03
Supplement: Supplemental_File_S4.zip [file str_validation_pilot.xlsx]

## Sheet: Sheet1
	MIPSTR genotype calls				Dideoxy genotype calls
str	bay	cvi	tsu	uod	bay	cvi	tsu	uod
41915	12	NA	11	NA	NA	22	11	28
15746	NA	7.3	NA	NA	6.3	NA	6	14
6204	NA	NA	NA	NA	6?	NA	NA	NA
84729	11.5	9.5	14.5	12.5	11.5	9.5	14.5	12.5
4806	NA	7.5	6.5	NA	16.5	7.5	6.5	15.5
65291	14.5	10.5	14.5	8.5	14.5	10.5	14.5	11.5
6396	7.3	7.3	7.3	7.3	7.3	7.3	7.3	7.3
7358	9.7	14.7	12.7	10.7	9.7	14.7	12.7	10.7
25822	NA	29.7	26.7	29.7	28.7	29.7	26.7	29.7
81231	28	15	7	27	29	15	7	27
78534	10	17	22	8	10	17	22	8
52814	10.7	NA	4.7	11.7	10.7	25.7	4.7	11.7
38753	22.3	9.3	16.3	21.3	22.3	9.3	16.3	21
		pilot accuracy:	0.945946

## Sheet: reformatted
str	strain	mipstr_allele	dideoxy_allele
41915	Bay	12	NA
15746	Bay	NA	6.3
6204	Bay	NA	6
84729	Bay	11.5	11.5
4806	Bay	NA	16.5
65291	Bay	14.5	14.5
6396	Bay	7.3	7.3
7358	Bay	9.7	9.7
25822	Bay	NA	28.7
81231	Bay	28	29
78534	Bay	10	10
52814	Bay	10.7	10.7
38753	Bay	22.3	22.3
41915	Cvi	NA	22
15746	Cvi	7.3	NA
6204	Cvi	NA	NA
84729	Cvi	9.5	9.5
4806	Cvi	7.5	7.5
65291	Cvi	10.5	10.5
6396	Cvi	7.3	7.3
7358	Cvi	14.7	14.7
25822	Cvi	29.7	29.7
81231	Cvi	15	15
78534	Cvi	17	17
52814	Cvi	NA	25.7
38753	Cvi	9.3	9.3
41915	Tsu	11	11
15746	Tsu	NA	6
6204	Tsu	NA	NA
84729	Tsu	14.5	14.5
4806	Tsu	6.5	6.5
65291	Tsu	14.5	14.5
6396	Tsu	7.3	7.3
7358	Tsu	12.7	12.7
25822	Tsu	26.7	26.7
81231	Tsu	7	7
78534	Tsu	22	22
52814	Tsu	4.7	4.7
38753	Tsu	16.3	16.3
41915	Uod-7	NA	28
15746	Uod-7	NA	14
6204	Uod-7	NA	NA
84729	Uod-7	12.5	12.5
4806	Uod-7	NA	15.5
65291	Uod-7	8.5	11.5
6396	Uod-7	7.3	7.3
7358	Uod-7	10.7	10.7
25822	Uod-7	29.7	29.7
81231	Uod-7	27	27
78534	Uod-7	8	8
52814	Uod-7	11.7	11.7
38753	Uod-7	21.3	21
