# Supplementary material for: Massive variation of short tandem repeats with functional consequences across strains of Arabidopsis thaliana
Source: HighWire-hosted journal article supplement (doi:10.1101/gr.231753.117), 2018-07-03
Supplement: Supplemental_File_S4.zip [file strwa_followups_040617.xlsx]

## Sheet: Sheet1
T-DNA_line	gene	STR	to_phenotype	actually	primer_rt_f	primer_rt_r
SALK_022640C	AT5G07050	83235	germ	at5g07060
SALK_028815C	AT5G07050	83235	germ	at5g07060	CTGGATCATTTACACTATAATAACGATCTC	CTAGAGCTGGACTGGATTATGAATCTTC	maybe ok?
SALK_062978C	AT1G04340	740	lesions?
SALK_064694C	AT1G04340	740	lesions?
SALK_082363C	AT4G03940.1	66655	germ
SALK_095303C	AT5G07050	83235	germ	at5g07060	CTGGATCATTTACACTATAATAACGATCTC	CTAGAGCTGGACTGGATTATGAATCTTC
SALK_110109C	AT4G03940.1	66655	lesions?	GERM
