# Supplementary material for: Massive variation of short tandem repeats with functional consequences across strains of Arabidopsis thaliana
Source: HighWire-hosted journal article supplement (doi:10.1101/gr.231753.117), 2018-07-03
Supplement: Supplemental_File_S4.zip [file strwa_list_110716.xlsx]

## Sheet: assocs_old
str_id	phenotype	p-value	type	gene	note	test?	primer_intr1	primer_intr2	primer_flank_w_intr2	pcr_note	t-dna
846	X5_FT10	5.6385e-08	near gene	AT1G04660.1	duf
846	X2_LDV	9.39398e-07	near gene	AT1G04660.1	duf
1424	X159_Silique.22	2.41525e-07	dhs	AT1G07490.1
1665	X6_FT16	2.71036e-07	dhs	AT1G08720.1
2479	X32_avrPphB	3.58043e-07	UTR	AT1G12200
2503	X6_FT16	6.10804e-07
3077	X174_Leaf.serr.16	5.79022e-07	intron	AT1G14770
3950	X6_FT16	1.23126e-07	coding	AT1G18750.1	AGL65
3950	X75_FW	8.933e-07	coding	AT1G18750.1	AGL65
4806	X277_Secondary.Dormancy	9.84604e-09	UTR	AT1G21970.1	EMBRYO DEFECTIVE 212,	test intron retention	GAG CCA CAC ATG GTG GTT	CACTATCAGCTACCAAAATCCATCTC	no other intr	intr 1200,
6204	X3_SD	9.29343e-08	intron	AT1G27570.1	lysine-sensitive aspartate kinase		TGA TCA ATA TTT CCT CCC TTG CTG	CTA CTA TCG GTG AGG AAG TAC ATT TAA GA	CCA GCG AAG GAA GTA GAC AGA	BIG intron
6204	X77_LES	5.9561e-07	intron	AT1G27570.1	lysine-sensitive aspartate kinase		TGA TCA ATA TTT CCT CCC TTG CTG	CTA CTA TCG GTG AGG AAG TAC ATT TAA GA	CCA GCG AAG GAA GTA GAC AGA	BIG intron
6204	X79_LY	5.9561e-07	intron	AT1G27570.1	lysine-sensitive aspartate kinase		TGA TCA ATA TTT CCT CCC TTG CTG	CTA CTA TCG GTG AGG AAG TAC ATT TAA GA	CCA GCG AAG GAA GTA GAC AGA	BIG intron
6204	X7_FT22	9.60233e-07	intron	AT1G27570.1	lysine-sensitive aspartate kinase		TGA TCA ATA TTT CCT CCC TTG CTG	CTA CTA TCG GTG AGG AAG TAC ATT TAA GA	CCA GCG AAG GAA GTA GAC AGA	BIG intron
6864	X45_8W.GH.FT	4.04397e-07	UTR	AT1G29900
7150	X1_LD	5.26661e-07	intron	AT1G30540
26127	X167_Chlorosis.10	3.2492e-07	near gene	AT2G01600.1	CUTICLE DESTRUCTING FACTOR 1
33137	X77_LES	3.07356e-09	coding	AT2G13770.1	also diversifying
37195	X2_LDV	3.16819e-10	coding	AT2G22000	innate immune ELICITOR PEPTIDE 6 PRECURSOR
37195	X42_8W	5.46679e-08	coding	AT2G22000	innate immune ELICITOR PEPTIDE 6 PRECURSOR
37195	X57_FT.Field	1.54293e-07	coding	AT2G22000	innate immune ELICITOR PEPTIDE 6 PRECURSOR
37359	X6_FT16	3.45589e-07	coding	AT2G22490.1	lysine-sensitive aspartate kinase
37359	X2_LDV	6.72427e-07	coding	AT2G22490.1	lysine-sensitive aspartate kinase
42022	X46_8W.GH.LN	6.45976e-07	UTR	AT2G36760
43970	X2_LDV	5.98958e-09	near gene	AT2G44840	nuthin	T-DNA
44238	X77_LES	6.93768e-07	coding	AT2G46180	USUALLY MULTIPLE ACIDS MOVE IN AND OUT TRANSPORTERS 9
46060	X167_Chlorosis.10	1.38865e-07	UTR	AT3G07650.1	DEVIL 9
46060	X2_LDV	7.50149e-07	UTR	AT3G07650.1	DEVIL 9
46815	X2_LDV	6.75292e-07	UTR	AT3G11810	ENTH/ANTH/VHS superfamily
47276	X2_LDV	1.05105e-07	dhs	AT3G13970.1	ATCYCD2;1
64810	X281_Storage.7.days	9.55308e-07	coding	AT3G63430
65213	X277_Secondary.Dormancy	9.77501e-09	coding	AT4G01080.1	TRICHOME BIREFRINGENCE-LIKE 26
65213	X46_8W.GH.LN	5.90478e-07	coding	AT4G01080.1	TRICHOME BIREFRINGENCE-LIKE 26
65291	X80_LN10	2.8999e-13	intron	AT4G01390.1	TRAF-like family protein	test intron retention	CAC CAA ACA TAC AAC AAT CTC CAA TAA G	CTT GAG CCA AAA TGG CAC AC	CCT CTT GGA TGA ACT TTA ATT CTC CAT TT
65677	X77_LES	8.27541e-07	intron	AT4G02260
73034	X9_Emco5	3.71162e-07	intron	AT4G10310
73178	X1_LD	5.09055e-07
79427	X17_Mg25	1.13024e-07	dhs	AT4G30140.1
80580	X2_LDV	2.05433e-07	intron	AT4G35130.1
81794	X77_LES	1.72434e-09	dhs	AT4G39980.1
83070	X4_SDV	2.27095e-07	dhs	AT5G06380.1
83235	X6_FT16	2.29827e-07	exon	AT5G07050.1
83239	X17_Mg25	1.48159e-09	dhs	AT5G07080.1
83458	X2_LDV	8.00996e-07	intron	AT5G07630
83988	X43_FLC	5.22786e-07	UTR	AT5G10278
84729	X2_LDV	3.12111e-08	intron	AT5G14060.1	lysine-sensitive aspartate kinase	test intron retention	GTT CCA AGT ATT TAG AAG CAA TGG AGT	GGA GAG CCC TCA CAC ATT G	CTC ATA TTA GAG AAG GTG TTC CAA GTA TTT
84729	X5_FT10	1.89427e-07	intron	AT5G14060.1	lysine-sensitive aspartate kinase	test intron retention
84730	X277_Secondary.Dormancy	2.04263e-08	UTR	AT5G14060.1	lysine-sensitive aspartate kinase
85970	X183_Trichome.avg.C	1.20013e-07	UTR	AT5G19090.1
86275	X45_8W.GH.FT	6.97875e-07	UTR	AT5G20260
86275	X2_LDV	7.01827e-07	UTR	AT5G20260
86626	X2_LDV	3.67825e-07	intron	AT5G22035.1	UBIQUITIN-SPECIFIC PROTEASE 8
86626	X57_FT.Field	4.25706e-07	intron	AT5G22035.1	UBIQUITIN-SPECIFIC PROTEASE 8
89719	X77_LES	1.3906e-10	transposon	AT5TE37190
89719	X79_LY	8.81841e-07	transposon	AT5TE37190
89911	X167_Chlorosis.10	7.62946e-07	UTR	AT5G28442
95577	X75_FW	7.0579e-07	UTR	AT5G37510
97504	X18_P31	7.88074e-07	????
97613	X167_Chlorosis.10	9.4386e-07	UTR	AT5G41910
100701	X79_LY	6.40591e-09	coding	AT5G50150.1
103035	X169_Chlorosis.22	8.34658e-07	????
104167	X1_LD	1.98794e-07	UTR	AT5G63640
105036	X57_FT.Field	5.45133e-07	UTR	AT5G67245

## Sheet: control_model_AICs
Phenotype	STR	SNP	Model	Log(L)	df	n	AIC	AICc
X2_LDV	-	-	Y ~ K	-371.24	1	87	744.48	744.527
X2_LDV	37195	-	Y ~ STR+K	-350.386	4	87	708.772	709.26
X2_LDV	-	snp.2.9302443	Y ~ SNP+K	-363.856	2	87	731.712	731.855
X2_LDV	37195	snp.2.9302443	Y ~ STR+SNP+K	-350.386	5	87	710.772	711.513
X2_LDV	-	snp.2.9598635	Y ~ SNP+K	-361.777	2	87	727.554	727.697
X2_LDV	37195	snp.2.9598635	Y ~ STR+SNP+K	-347.755	5	87	705.511	706.252
X1_LD	-	-	Y ~ K	-389.228	1	87	780.456	780.503
X1_LD	65291	-	Y ~ STR+K	-360.626	10	87	741.252	744.146
X1_LD	-	snp.4.454542	Y ~ SNP+K	-370.958	2	87	745.916	746.059
X1_LD	65291	snp.4.454542	Y ~ STR+SNP+K	-346.452	11	87	714.905	718.425

## Sheet: control_for_snps_65291
65291 X1_LD snp.4.454542					SUPERSEDED
Linear mixed-effects kinship model fit by maximum likelihood					Data: data
Data: data					Log-likelihood = -360.6258
Log-likelihood = -389.2278					n= 87
n= 87
					Model: as.numeric(phenos) ~ as.factor(genos) + (1 | id)
Model: as.numeric(phenos) ~ (1 | id)					Fixed coefficients
Fixed coefficients					Value Std Error z p
Value Std Error z p					(Intercept) 33.045393 3.258346 10.14 0.0e+00
(Intercept) 35.5313 30.58824 1.16 0.25					as.factor(genos)12.5 -2.712132 9.400556 -0.29 7.7e-01
					as.factor(genos)13.5 5.254651 4.719041 1.11 2.7e-01
Random effects					as.factor(genos)14.5 -19.267647 4.854423 -3.97 7.2e-05
Group Variable Std Dev Variance					as.factor(genos)15.5 6.329453 6.306097 1.00 3.2e-01
id Vmat.1 37.73618 1424.01913					as.factor(genos)24.5 27.954568 15.617379 1.79 7.3e-02
Residual error= 6.145613					as.factor(genos)5.5 30.620834 9.400625 3.26 1.1e-03
					as.factor(genos)6.5 28.454431 7.034730 4.04 5.2e-05
					as.factor(genos)7.5 26.954383 11.280670 2.39 1.7e-02
					as.factor(genos)8.5 29.954391 8.302369 3.61 3.1e-04
					Random effects
					Group Variable Std Dev Variance
					id Vmat.1 0.13582071 0.01844726
					Residual error= 15.27391
Linear mixed-effects kinship model fit by maximum likelihood					Linear mixed-effects kinship model fit by maximum likelihood
Data: data					Data: data
Log-likelihood = -370.9579					Log-likelihood = -346.4523
n= 87					n= 87
Model: as.numeric(phenos) ~ control + (1 | id)					Model: as.numeric(phenos) ~ as.factor(genos) + control + (1 | id)
Fixed coefficients					Fixed coefficients
Value Std Error z p					Value Std Error z p
(Intercept) 18.10023 3.142781 5.76 8.4e-09					(Intercept) 18.264274 3.766218 4.85 1.2e-06
control2 27.46124 3.879667 7.08 1.5e-12					as.factor(genos)12.5 5.692862 8.118210 0.70 4.8e-01
					as.factor(genos)13.5 6.645799 4.016796 1.65 9.8e-02
Random effects					as.factor(genos)14.5 -9.799963 4.437057 -2.21 2.7e-02
Group Variable Std Dev Variance					as.factor(genos)15.5 6.764186 5.358591 1.26 2.1e-01
id Vmat.1 0.15279134 0.02334519					as.factor(genos)24.5 23.607180 13.290762 1.78 7.6e-02
Residual error= 17.19995					as.factor(genos)5.5 26.273548 8.022600 3.27 1.1e-03
					as.factor(genos)6.5 27.295146 5.980512 4.56 5.0e-06
					as.factor(genos)7.5 22.606972 9.614158 2.35 1.9e-02
					as.factor(genos)8.5 30.389097 7.054625 4.31 1.6e-05
					control2 19.128626 3.304409 5.79 7.1e-09
					Random effects
					Group Variable Std Dev Variance
					id Vmat.1 0.11542801 0.01332363
					Residual error= 12.97769

## Sheet: control_for_snps_37195
37195	X2_LDV	snp.2.9302443	snp.2.9598635		SUPERSEDED
Linear mixed-effects kinship model fit by maximum likelihood					Linear mixed-effects kinship model fit by maximum likelihood
Data: data					Data: data
Log-likelihood = -371.2401					Log-likelihood = -350.386
n= 87					n= 87
Model: as.numeric(phenos) ~ (1 | id)					Model: as.numeric(phenos) ~ as.factor(genos) + (1 | id)
Fixed coefficients					Fixed coefficients
Value Std Error z p					Value Std Error z p
(Intercept) 34.57035 26.56026 1.3 0.19					(Intercept) 34.378953 21.617016 1.59 0.110
					as.factor(genos)6.3 9.858763 5.769474 1.71 0.087
Random effects					as.factor(genos)7.3 -13.129661 5.655193 -2.32 0.020
Group Variable Std Dev Variance					as.factor(genos)8.3 -14.254669 11.601301 -1.23 0.220
id Vmat.1 32.8039 1076.0956
Residual error= 0.1637521					Random effects
					Group Variable Std Dev Variance
					id Vmat.1 25.80789 666.04734
					Residual error= 0.2269899
Linear mixed-effects kinship model fit by maximum likelihood					Linear mixed-effects kinship model fit by maximum likelihood
Data: data					Data: data
Log-likelihood = -363.8559					Log-likelihood = -350.3379
n= 87					n= 87
Model: as.numeric(phenos) ~ control + (1 | id)					Model: as.numeric(phenos) ~ as.factor(genos) + control + (1 | id)
Fixed coefficients					Fixed coefficients
Value Std Error z p					Value Std Error z p
(Intercept) 24.03719 2.160247 11.13 0e+00					(Intercept) 33.572329 21.750376 1.54 0.120
control2 17.59915 3.502574 5.02 5e-07					as.factor(genos)6.3 9.751531 5.775782 1.69 0.091
					as.factor(genos)7.3 -12.457434 6.044106 -2.06 0.039
Random effects					as.factor(genos)8.3 -13.398539 11.909487 -1.13 0.260
Group Variable Std Dev Variance					control2 1.236616 3.941777 0.31 0.750
id Vmat.1 0.14085954 0.01984141
Residual error= 15.85165					Random effects
					Group Variable Std Dev Variance
					id Vmat.1 25.78422 664.82596
					Residual error= 0.3587712
					[1] -350.3379
37195 X2_LDV snp.2.9302443 snp.2.9598635
Linear mixed-effects kinship model fit by maximum likelihood					Linear mixed-effects kinship model fit by maximum likelihood
Data: data					Data: data
Log-likelihood = -371.2401					Log-likelihood = -350.386
n= 87					n= 87
Model: as.numeric(phenos) ~ (1 | id)					Model: as.numeric(phenos) ~ as.factor(genos) + (1 | id)
Fixed coefficients					Fixed coefficients
Value Std Error z p					Value Std Error z p
(Intercept) 34.57035 26.56026 1.3 0.19					(Intercept) 34.378953 21.617016 1.59 0.110
					as.factor(genos)6.3 9.858763 5.769474 1.71 0.087
Random effects					as.factor(genos)7.3 -13.129661 5.655193 -2.32 0.020
Group Variable Std Dev Variance					as.factor(genos)8.3 -14.254669 11.601301 -1.23 0.220
id Vmat.1 32.8039 1076.0956
Residual error= 0.1637521					Random effects
					Group Variable Std Dev Variance
					id Vmat.1 25.80789 666.04734
					Residual error= 0.2269899
Linear mixed-effects kinship model fit by maximum likelihood					Linear mixed-effects kinship model fit by maximum likelihood
Data: data					Data: data
Log-likelihood = -361.7769					Log-likelihood = -347.7555
n= 87					n= 87
Model: as.numeric(phenos) ~ control + (1 | id)					Model: as.numeric(phenos) ~ as.factor(genos) + control + (1 | id)
Fixed coefficients					Fixed coefficients
Value Std Error z p					Value Std Error z p
(Intercept) 59.62483 5.473324 10.89 0.0e+00					(Intercept) 54.138186 7.587453 7.14 9.7e-13
control2 -31.83994 5.742579 -5.54 2.9e-08					as.factor(genos)6.3 5.486639 5.988858 0.92 3.6e-01
					as.factor(genos)7.3 -12.833409 5.718152 -2.24 2.5e-02
Random effects					as.factor(genos)8.3 -12.333406 10.756322 -1.15 2.5e-01
Group Variable Std Dev Variance					control2 -20.304805 5.351234 -3.79 1.5e-04
id Vmat.1 0.1376430 0.0189456
Residual error= 15.47733					Random effects
[1] -361.7769					Group Variable Std Dev Variance
					id Vmat.1 0.11711057 0.01371488
					Residual error= 13.17356

## Sheet: OLDeffect_sizes_X1_LD
locus	estimate	SE	p-val_96	p-val_snp_all		log:	locus	estimate	SE	z	p-val_96
snp.5.25386559	-9.63714	7.89515	0.22				snp.5.25386559	-0.36082	0.243888	-1.48	0.14
snp.5.19508285	-22.6145	6.45857	0.00046				snp.5.19508285	-0.899466	0.181707	-4.95	7.4e-07
snp.2.9581605	-28.3512	4.69656	1.6e-09				snp.2.9581605	-1.06475	0.122394	-8.7	0
snp.1.3895353	32.6393	5.39103	1.4e-09				snp.1.3895353	1.3504	0.127766	10.57	0
65291	-3.49996	10.1956	0.73				65291	-0.061968	0.296498	-0.21	0.83
65291	5.65137	4.9143	0.25				65291	0.310026	0.142912	2.17	0.03
65291	-21.7982	5.11269	2e-05				65291	-0.332942	0.148682	-2.24	0.025
65291	8.72182	6.50774	0.18				65291	0.269603	0.18925	1.42	0.15
65291	28.8331	16.9927	0.09				65291	0.759225	0.494164	1.54	0.12
65291	34.2332	8.18478	2.9e-05				65291	1.35517	0.238021	5.69	1.2e-08
65291	30.4999	7.59937	6e-05				65291	1.27151	0.220997	5.75	8.7e-09
65291	28.333	12.2536	0.021				65291	0.929629	0.356347	2.61	0.0091
65291	31.583	8.99171	0.00044				65291	1.10851	0.261487	4.24	2.2e-05
65213	22.4994	13.6342	0.099				65213	0.418203	0.422315	0.99	0.32
65213	40.6664	7.87165	2.4e-07				65213	0.741834	0.243824	3.04	0.0023
65213	33.9999	18.5802	0.067				65213	0.465673	0.575518	0.81	0.42
65213	20.9999	13.6341	0.12				65213	0.291403	0.422315	0.69	0.49
65213	10	10.3064	0.33				65213	0.122692	0.31924	0.38	0.7
65213	42.714	8.48997	4.9e-07				65213	1.09363	0.262976	4.16	3.2e-05
65213	16.0665	6.91375	0.02				65213	0.378381	0.214153	1.77	0.077
65213	15	6.31137	0.017				65213	0.306939	0.195494	1.57	0.12
65213	43.8418	6.58236	2.7e-11				65213	1.24864	0.203888	6.12	9.1e-10
47276	1.33331	3.11882	0.67				47276	-0.0115398	0.507236	-0.02	0.98
47276	2.33337	2.20533	0.29				47276	0.10628	0.35867	0.3	0.77
47276	13.3334	1.97251	1.4e-11				47276	1.93937	0.320804	6.05	1.5e-09
47276	5.33337	2.20534	0.016				47276	0.257216	0.35867	0.72	0.47
47276	10.3333	2.20533	2.8e-06				47276	0.658696	0.35867	1.84	0.066
47276	11.5333	1.77799	8.8e-11				47276	1.57042	0.289169	5.43	5.6e-08
33085	-37.4995	21.0996	0.076				33085	-0.702322	0.651182	-1.08	0.28
33085	-48.9997	24.3637	0.044				33085	-0.849863	0.75192	-1.13	0.26
33085	1.68796	17.758	0.92				33085	0.743922	0.548052	1.36	0.17
33085	-10.2995	17.6532	0.56				33085	-0.0550604	0.544818	-0.1	0.92
33085	-29.6972	17.4269	0.088				33085	-0.497675	0.537835	-0.93	0.35
33085	-37.9996	19.2612	0.049				33085	-0.700033	0.594445	-1.18	0.24
3692	24.4443	5.25127	3.2e-06				3692	0.962929	0.147429	6.53	6.5e-11
3692	-34.5556	19.6726	0.079				3692	-0.587639	0.552309	-1.06	0.29
3692	-23.5554	9.2612	0.011				3692	-0.416199	0.260009	-1.6	0.11
3692	-5.03378	5.17992	0.33				3692	-0.023153	0.145426	-0.16	0.87
3692	-7.18084	7.58478	0.34				3692	-0.162288	0.212943	-0.76	0.45

## Sheet: NEW_effectsizes_032417
locus	estimate	SE	z	pval
3950	1.37358	0.165614	8.29	1.1e-16
37359	1.48015	0.25524	5.8	6.7e-09
37359	-0.191666	0.289599	-0.66	0.51
37359	-0.635687	0.483355	-1.32	0.19
37359	1.48015	0.192527	7.69	1.5e-14
37359	-0.447632	0.483355	-0.93	0.35
37359	-0.0751554	0.114998	-0.65	0.51
43058	0.396621	0.27496	1.44	0.15
43058	0.446734	0.331066	1.35	0.18
43058	1.0311	0.570642	1.81	0.071
43058	1.88057	0.316111	5.95	2.7e-09
43058	1.92778	0.447433	4.31	1.6e-05
43970	-1.10754	0.215055	-5.15	2.6e-07
43970	-1.36198	0.508155	-2.68	0.0074
43970	-1.27828	0.38811	-3.29	0.00099
43970	-1.08657	0.271621	-4	6.3e-05
43970	-1.30166	0.508156	-2.56	0.01
43970	0.114808	0.508156	0.23	0.82
43970	0.467899	0.264453	1.77	0.077
43970	-1.36198	0.508155	-2.68	0.0074
43970	0.245872	0.38811	0.63	0.53
65291	-0.061968	0.296498	-0.21	0.83
65291	0.310026	0.142912	2.17	0.03
65291	-0.332942	0.148682	-2.24	0.025
65291	0.269603	0.18925	1.42	0.15
65291	0.759225	0.494164	1.54	0.12
65291	1.35517	0.238021	5.69	1.2e-08
65291	1.27151	0.220997	5.75	8.7e-09
65291	0.929629	0.356347	2.61	0.0091
65291	1.10851	0.261487	4.24	2.2e-05
81421	-0.0508869	0.149233	-0.34	0.73
81421	-0.358613	0.221877	-1.62	0.11
81421	0.23601	0.221877	1.06	0.29
81421	-0.286029	0.184567	-1.55	0.12
81421	1.40286	0.276022	5.08	3.7e-07
81421	-0.155577	0.184567	-0.84	0.4
81421	-0.439096	0.170324	-2.58	0.0099
81421	0.635011	0.459329	1.38	0.17
81421	-0.494501	0.276022	-1.79	0.073
81421	-0.101538	0.459328	-0.22	0.83
81421	-0.391193	0.459328	-0.85	0.39
81421	0.260008	0.459328	0.57	0.57
81421	1.40285	0.184567	7.6	2.9e-14
snp.1.3895353	1.3504	0.127766	10.57	0
snp.2.9581605	-1.06475	0.122394	-8.7	0
snp.5.19508285	-0.899466	0.181707	-4.95	7.4e-07
snp.5.25386559	-0.36082	0.243888	-1.48	0.14

## Sheet: NEW_assocs_032317
ID	Phenotype	P-value	gene	note	near_gwas_hit	candidate?
740	X279_DSDS50	1.77191e-09	AT1G04350		none
740	X281_Storage.7.days	2.53745e-09	AT1G04350
740	X282_Storage.28.days	4.72578e-09	AT1G04350		none
740	X8_Seed.Dormancy	8.24661e-09	AT1G04350
740	X283_Storage.56.days	3.10137e-08	AT1G04350
1175	X279_DSDS50	4.15618e-07			1 : 1921587
1665	X47_0W.GH.FT	1.73487e-11	AT1G08720.1		1 : 2778963
2479	X32_avrPphB	3.58043e-07	AT1G12200		1 : 4143163
2503	X47_0W.GH.FT	3.26469e-12			no
3692	X6_FT16	7.99741e-11			1 : 6369772
3950	X47_0W.GH.FT	4.15709e-16	AT1G18750.1	AGL65	1 : 6371576
3950	X7_FT22	5.25407e-16	AT1G18750.1	AGL65	1 : 6369772
3950	X6_FT16	3.60052e-15	AT1G18750.1	AGL65	1 : 6369772
3950	X1_LD	6.31536e-13	AT1G18750.1	AGL65	1 : 6369772
3950	X40_2W	3.29507e-11	AT1G18750.1	AGL65
3950	X59_FT.GH	3.99397e-11	AT1G18750.1	AGL65
3950	X41_4W	4.37464e-11	AT1G18750.1	AGL65
3950	X279_DSDS50	2.38633e-08	AT1G18750.1	AGL65
3950	X281_Storage.7.days	4.55571e-08	AT1G18750.1	AGL65
3950	X8_Seed.Dormancy	2.1394e-07	AT1G18750.1	AGL65
4806	X277_Secondary.Dormancy	9.32302e-07			1 : 7785207
6016	X47_0W.GH.FT	5.44622e-11			no
16984	X47_0W.GH.FT	5.52509e-11			none
16984	X7_FT22	7.36016e-11			none
25087	X279_DSDS50	2.77947e-07			none
25087	X8_Seed.Dormancy	3.75058e-07
26127	X167_Chlorosis.10	3.2492e-07	AT2G01600.1	CUTICLE DESTRUCTING FACTOR 1	no
28690	X61_LC.Duration.GH	7.87315e-08			no
28690	X62_LFS.GH	1.23819e-07
33085	X47_0W.GH.FT	7.88042e-11			no
33137	X77_LES	3.07356e-09	AT2G13770.1	also diversifying	no
37035	X279_DSDS50	5.31779e-07			no
37079	X279_DSDS50	5.49274e-08			no
37079	X281_Storage.7.days	6.63747e-07
37359	X47_0W.GH.FT	7.68284e-20			2 : 9602595
37359	X7_FT22	5.29352e-19			2 : 9599711
37359	X6_FT16	3.62889e-16			2 : 9581605
37359	X1_LD	3.48638e-14	AT2G22490.1	lysine-sensitive aspartate kinase	2 : 9581436	SVP
37359	X41_4W	4.21386e-13
37359	X40_2W	8.78096e-13
37359	X59_FT.GH	7.98625e-12
37359	X17_Mg25	4.04903e-07	AT2G22490.1	lysine-sensitive aspartate kinase	2 : 9581605	agl17
37359	X279_DSDS50	4.18898e-07
37359	X281_Storage.7.days	8.58572e-07
38510	X61_LC.Duration.GH	9.96705e-07			no
41068	X7_FT22	4.06315e-11			2 : 13886899
43058	X7_FT22	2.87827e-14			none
43058	X47_0W.GH.FT	1.29263e-13			2 : 16917776
43058	X6_FT16	2.2345e-13
43058	X1_LD	1.15898e-11				CRY1
43058	X279_DSDS50	1.73573e-07
43058	X281_Storage.7.days	2.66267e-07
43114	X281_Storage.7.days	1.51798e-07			no
43114	X279_DSDS50	1.82321e-07
43898	X281_Storage.7.days	6.48548e-09			no
43898	X279_DSDS50	3.98408e-08
43970	X1_LD	2.23546e-13	AT2G44840	ATERF13	2 : 18439471
43970	X47_0W.GH.FT	3.28856e-13
43970	X7_FT22	1.04068e-12			2 : 18439471
43970	X2_LDV	2.93637e-12
43970	X59_FT.GH	7.72703e-12
43970	X6_FT16	1.07182e-11
44238	X77_LES	6.93768e-07	AT2G46180	USUALLY MULTIPLE ACIDS MOVE IN AND OUT TRANSPORTERS 9	no
44240	X41_4W	1.37284e-11			no
46060	X47_0W.GH.FT	8.38441e-11	AT3G07650.1	col9; http://onlinelibrary.wiley.com/doi/10.1111/j.1365-313X.2005.02491.x/full	no
46060	X167_Chlorosis.10	1.38865e-07	AT3G07650.1	DEVIL 9	no
46800	X7_FT22	2.71492e-11			no
49282	X8_Seed.Dormancy	7.61798e-08			no
62097	X282_Storage.28.days	2.91118e-07			no
64896	X8_Seed.Dormancy	7.45637e-07			no
65213	X277_Secondary.Dormancy	4.23578e-07	AT4G01080.1	TRICHOME BIREFRINGENCE-LIKE 26	4 : 429928
65291	X6_FT16	2.74906e-13	AT4G01390.1	TRAF-like family protein	4 : 581120
65291	X80_LN10	1.45073e-12
65291	X1_LD	9.04417e-12	AT4G01390.1	TRAF-like family protein	done
65291	X7_FT22	3.34455e-11	AT4G01390.1	TRAF-like family protein
65291	X47_0W.GH.FT	5.58913e-11	AT4G01390.1	TRAF-like family protein	done
65677	X281_Storage.7.days	4.19243e-07
65677	X186_Bacterial.titer	7.12507e-07	intron	AT4G02260	no
65677	X77_LES	8.27541e-07
66655	X8_Seed.Dormancy	2.50665e-10			no
70913	X8_Seed.Dormancy	2.6721e-08			no
73034	X9_Emco5	3.71162e-07	intron	AT4G10310	no
79427	X17_Mg25	3.27781e-07	AT4G30140.1		no
79884	X279_DSDS50	3.7528e-07			no
81421	X47_0W.GH.FT	4.30565e-15			none
81421	X7_FT22	1.70327e-14			none
81421	X6_FT16	5.96927e-13
81421	X1_LD	5.93232e-12
81421	X279_DSDS50	1.57252e-08			no
81421	X281_Storage.7.days	2.40806e-07
81421	X8_Seed.Dormancy	3.94562e-07
81794	X77_LES	1.72434e-09	AT4G39980.1	atraba4b	no
82895	X8_Seed.Dormancy	3.49138e-08			no
83235	X7_FT22	4.85578e-12			5 : 2265385
83235	X47_0W.GH.FT	1.95765e-11			5 : 2185406
83235	X279_DSDS50	3.35295e-11	AT5G07050.1		5 : 2095951
83235	X281_Storage.7.days	1.21248e-10
83235	X8_Seed.Dormancy	1.9473e-09
83239	X17_Mg25	3.79829e-09	AT5G07080.1		5 : 2339456
83458	X47_0W.GH.FT	2.65254e-13	AT5G07630		no
83458	X7_FT22	7.21957e-11			5 : 2337756
83682	X279_DSDS50	2.10791e-07			no
83682	X281_Storage.7.days	5.51951e-07
83692	X281_Storage.7.days	5.13038e-07
83692	X279_DSDS50	6.13602e-07			no
84219	X61_LC.Duration.GH	1.7854e-07			no
84219	X62_LFS.GH	3.0977e-07
84683	X281_Storage.7.days	1.40128e-07			5 : 4697537
84683	X279_DSDS50	3.21446e-07
84729	X7_FT22	2.42765e-11			no
84729	X6_FT16	7.88334e-11			no
84729	X279_DSDS50	1.19585e-10	AT5G14060.1		no
84729	X281_Storage.7.days	3.8483e-10
84729	X15_B11	4.56144e-08	AT5G14060.1		no
84729	X8_Seed.Dormancy	6.16366e-08
84730	X277_Secondary.Dormancy	3.47842e-08
85970	X175_Leaf.serr.22	5.46429e-08
86275	X7_FT22	1.08336e-12			5 : 6685571
86275	X47_0W.GH.FT	1.09786e-12	AT5G20260	Exostosin family protein	no
86275	X59_FT.GH	2.74452e-11	AT5G20260	Exostosin family protein	5 : 6841037
86275	X281_Storage.7.days	2.65498e-07	AT5G20260	Exostosin family protein	5 : 6690646
88181	X277_Secondary.Dormancy	9.61689e-07			no
89719	X281_Storage.7.days	4.5769e-12	AT5TE37190		no
89719	X77_LES	1.3906e-10
89719	X279_DSDS50	6.50265e-10	AT5TE37190		no
89719	X79_LY	8.81841e-07
89911	X167_Chlorosis.10	7.62946e-07	AT5G28442		no
97613	X167_Chlorosis.10	9.4386e-07	AT5G41910		no
99290	X61_LC.Duration.GH	1.30052e-07			5 : 18608407
99290	X62_LFS.GH	1.69816e-07
100158	X8_Seed.Dormancy	1.50463e-10			no
100430	X17_Mg25	1.4522e-07
100701	X79_LY	6.40591e-09	AT5G50150.1	paper http://www.sciencedirect.com/science/article/pii/S0960982217300623	no
103217	X8_Seed.Dormancy	2.64025e-07			no
104470	X62_LFS.GH	8.045e-08			no
104470	X61_LC.Duration.GH	1.19481e-07			no
104492	X8_Seed.Dormancy	4.50341e-07			no

## Sheet: rajiv_eqtls_042817
STR	gene	beta	t-stat	p-value	FDR
STR_77418	AT4G21670	-0.726601	-6.50579	2.42536e-06	0.202737
STR_80659	AT4G33120	0.862124	6.29153	3.84019e-06	0.202737
STR_100562	AT5G48090	-1.37833	-5.95691	7.96317e-06	0.251369
STR_77418	AT4G21860	0.772661	5.78392	1.16717e-05	0.251369
STR_83137	AT5G06660	-0.904907	-5.75807	1.23616e-05	0.251369
STR_99144	AT5G44565	-1.76613	-5.67218	1.49691e-05	0.251369
STR_99144	AT5G47770	2.02117	5.62418	1.66648e-05	0.251369
STR_85241	AT5G18860	0.898199	5.54508	1.98996e-05	0.262643
STR_43830	AT2G43950	-1.90997	-5.22635	4.09387e-05	0.450428
STR_1840	AT1G11350	-1.60739	-5.14077	4.97717e-05	0.450428
STR_82895	AT5G03770	-2.56872	-5.13032	5.09759e-05	0.450428
STR_21447	AT1G62640	-0.608653	-5.09973	5.4673e-05	0.450428
STR_104448	AT5G62540	-0.989527	-5.09351	5.54572e-05	0.450428
STR_39206	AT2G28130	-2.02993	-5.05053	6.12e-05	0.461566
STR_46518	AT3G10640	0.914438	5.00401	6.80999e-05	0.479364
STR_84539	AT5G10946	1.51324	4.97351	7.30469e-05	0.48205
STR_46518	AT3G11590	-0.936325	-4.92089	8.24562e-05	0.512135

## Sheet: to_control_for
str	start	end	candidate_snp	snp_locus	candidate_other	candidate_snp_other	phenos	checks out?	otheSNPs from https://gwas.gmi.oeaw.ac.at/#/analysis/50/studygwas
37195	9363974	9363995	svp	9588685			X1_LD	yes	9302443	9368745
65291	571084	571112	cry1	5742291	etc3	454542	X2_LDV	yes	429928
							X40_2W
							X42_8W
							X46_8W.GH.LN
							X57_FT.Field
							X59_FT.GH
							X80_LN10
		SUPERSEDED	SUPERSEDED
		SUPERSEDED	SUPERSEDED

## Sheet: OLDassocs_120716
str	pheno	pval	gene	note	near_gwas_hit	candidate?
846	X2_LDV	9.39e-07	AT1G04660.1	duf	no
846	X5_FT10	5.64e-08	AT1G04660.1	duf	no
1424	X159_Silique.22	2.42e-07	AT1G07490.1		no
1665	X6_FT16	2.71e-07	AT1G08720.1		1 : 2778963
2479	X32_avrPphB	3.58e-07	AT1G12200		1 : 4143163
2503	X6_FT16	6.11e-07			no
3077	X174_Leaf.serr.16	5.79e-07	AT1G14770		no
3692	X1_LD	3.65e-07			1 : 6371576
3950	X6_FT16	1.23e-07	AT1G18750.1	AGL65	1 : 6369772
6864	X45_8W.GH.FT	4.04e-07	AT1G29900		1 : 10458712
26127	X167_Chlorosis.10	3.25e-07	AT2G01600.1	CUTICLE DESTRUCTING FACTOR 1	no
33085	X1_LD	1.07e-07			no
33137	X77_LES	3.07e-09	AT2G13770.1	also diversifying	no
37195	X2_LDV	3.17e-10	AT2G22000	innate immune ELICITOR PEPTIDE 6 PRECURSOR	done
37195	X42_8W	5.47e-08	AT2G22000	innate immune ELICITOR PEPTIDE 6 PRECURSOR	done
37195	X46_8W.GH.LN	1.39e-07	AT2G22000	innate immune ELICITOR PEPTIDE 6 PRECURSOR	done
37195	X57_FT.Field	1.54e-07	AT2G22000	innate immune ELICITOR PEPTIDE 6 PRECURSOR	done
37359	X2_LDV	6.72e-07	AT2G22490.1	lysine-sensitive aspartate kinase	2 : 9581436	SVP
37359	X6_FT16	3.46e-07	AT2G22490.1	lysine-sensitive aspartate kinase	2 : 9581605	agl17
43970	X2_LDV	5.99e-09	AT2G44840	ATERF13	2 : 18439471
44238	X77_LES	6.94e-07	AT2G46180	USUALLY MULTIPLE ACIDS MOVE IN AND OUT TRANSPORTERS 9	no
45525	X8_Seed.Dormancy	2.04e-08			no
46060	X167_Chlorosis.10	1.39e-07	AT3G07650.1	DEVIL 9	no
46060	X2_LDV	7.5e-07	AT3G07650.1	DEVIL 9	no
46815	X2_LDV	6.75e-07	AT3G11810	ENTH/ANTH/VHS superfamily	no
47276	X1_LD	5.87e-07	AT3G13970.1	ATCYCD2;1	no
47276	X2_LDV	1.05e-07	AT3G13970.1	ATCYCD2;1	no
64810	X281_Storage.7.days	9.55e-07	AT3G63430		no
64958	X46_8W.GH.LN	2.62e-07			no
65213	X1_LD	1.95e-08	AT4G01080.1	TRICHOME BIREFRINGENCE-LIKE 26	4 : 429928	etc3
65213	X46_8W.GH.LN	1.64e-09	AT4G01080.1	TRICHOME BIREFRINGENCE-LIKE 26	4 : 500090	CRY1
65291	X1_LD	5.44e-11	AT4G01390.1	TRAF-like family protein	done
65291	X40_2W	4.27e-08	AT4G01390.1	TRAF-like family protein	done
65291	X59_FT.GH	2.1e-07	AT4G01390.1	TRAF-like family protein	done
65291	X80_LN10	2.9e-13	AT4G01390.1	TRAF-like family protein	done
65677	X77_LES	8.28e-07	intron	AT4G02260	no
73034	X9_Emco5	3.71e-07	intron	AT4G10310	no
79427	X17_Mg25	1.13e-07	AT4G30140.1		no
80580	X2_LDV	2.05e-07	AT4G35130.1		no
81794	X77_LES	1.72e-09	AT4G39980.1		no
83070	X4_SDV	2.27e-07	AT5G06380.1		no
83070	X46_8W.GH.LN	3.73e-09	AT5G06380.1		5 : 2002340
83235	X6_FT16	2.3e-07	AT5G07050.1		5 : 2095951
83239	X17_Mg25	1.48e-09	AT5G07080.1		5 : 2339456
83458	X2_LDV	8.01e-07	AT5G07630		no
84729	X2_LDV	3.12e-08	AT5G14060.1		no
84729	X5_FT10	1.89e-07	AT5G14060.1		no
86275	X2_LDV	7.02e-07	AT5G20260	Exostosin family protein	5 : 6690646
86275	X45_8W.GH.FT	6.98e-07	AT5G20260	Exostosin family protein	no
86275	X46_8W.GH.LN	4.98e-07	AT5G20260	Exostosin family protein	5 : 6841037
86626	X2_LDV	3.68e-07	AT5G22035.1	UBIQUITIN-SPECIFIC PROTEASE 8	no
86626	X57_FT.Field	4.26e-07	AT5G22035.1	UBIQUITIN-SPECIFIC PROTEASE 8	5 : 7382860
89719	X77_LES	1.39e-10	AT5TE37190		no
89719	X79_LY	8.82e-07	AT5TE37190		no
89911	X167_Chlorosis.10	7.63e-07	AT5G28442		no
97613	X167_Chlorosis.10	9.44e-07	AT5G41910		no
100701	X79_LY	6.41e-09	AT5G50150.1		no
105036	X57_FT.Field	5.45e-07	AT5G67245		no

[truncated: 4 more sheets: OLD_control_model_AICs, NEW_control_model_AICs, primers, t-dnas]
