# Supplementary material for: Massive variation of short tandem repeats with functional consequences across strains of Arabidopsis thaliana
Source: HighWire-hosted journal article supplement (doi:10.1101/gr.231753.117), 2018-07-03
Supplement: Supplemental_File_S4.zip [file strwa_list_110716.xlsx]

## Sheet: assocs_old
str_id	phenotype	p-value	type	gene	note	test?	primer_intr1	primer_intr2	primer_flank_w_intr2	pcr_note	t-dna
846	X5_FT10	5.6385e-08	near gene	AT1G04660.1	duf
846	X2_LDV	9.39398e-07	near gene	AT1G04660.1	duf
1424	X159_Silique.22	2.41525e-07	dhs	AT1G07490.1
1665	X6_FT16	2.71036e-07	dhs	AT1G08720.1
2479	X32_avrPphB	3.58043e-07	UTR	AT1G12200
2503	X6_FT16	6.10804e-07
3077	X174_Leaf.serr.16	5.79022e-07	intron	AT1G14770
3950	X6_FT16	1.23126e-07	coding	AT1G18750.1	AGL65
3950	X75_FW	8.933e-07	coding	AT1G18750.1	AGL65
4806	X277_Secondary.Dormancy	9.84604e-09	UTR	AT1G21970.1	EMBRYO DEFECTIVE 212,	test intron retention	GAG CCA CAC ATG GTG GTT	CACTATCAGCTACCAAAATCCATCTC	no other intr	intr 1200,
6204	X3_SD	9.29343e-08	intron	AT1G27570.1	lysine-sensitive aspartate kinase		TGA TCA ATA TTT CCT CCC TTG CTG	CTA CTA TCG GTG AGG AAG TAC ATT TAA GA	CCA GCG AAG GAA GTA GAC AGA	BIG intron
6204	X77_LES	5.9561e-07	intron	AT1G27570.1	lysine-sensitive aspartate kinase		TGA TCA ATA TTT CCT CCC TTG CTG	CTA CTA TCG GTG AGG AAG TAC ATT TAA GA	CCA GCG AAG GAA GTA GAC AGA	BIG intron
6204	X79_LY	5.9561e-07	intron	AT1G27570.1	lysine-sensitive aspartate kinase		TGA TCA ATA TTT CCT CCC TTG CTG	CTA CTA TCG GTG AGG AAG TAC ATT TAA GA	CCA GCG AAG GAA GTA GAC AGA	BIG intron
6204	X7_FT22	9.60233e-07	intron	AT1G27570.1	lysine-sensitive aspartate kinase		TGA TCA ATA TTT CCT CCC TTG CTG	CTA CTA TCG GTG AGG AAG TAC ATT TAA GA	CCA GCG AAG GAA GTA GAC AGA	BIG intron
6864	X45_8W.GH.FT	4.04397e-07	UTR	AT1G29900
7150	X1_LD	5.26661e-07	intron	AT1G30540
26127	X167_Chlorosis.10	3.2492e-07	near gene	AT2G01600.1	CUTICLE DESTRUCTING FACTOR 1
33137	X77_LES	3.07356e-09	coding	AT2G13770.1	also diversifying
37195	X2_LDV	3.16819e-10	coding	AT2G22000	innate immune ELICITOR PEPTIDE 6 PRECURSOR
37195	X42_8W	5.46679e-08	coding	AT2G22000	innate immune ELICITOR PEPTIDE 6 PRECURSOR
37195	X57_FT.Field	1.54293e-07	coding	AT2G22000	innate immune ELICITOR PEPTIDE 6 PRECURSOR
37359	X6_FT16	3.45589e-07	coding	AT2G22490.1	lysine-sensitive aspartate kinase
37359	X2_LDV	6.72427e-07	coding	AT2G22490.1	lysine-sensitive aspartate kinase
42022	X46_8W.GH.LN	6.45976e-07	UTR	AT2G36760
43970	X2_LDV	5.98958e-09	near gene	AT2G44840	nuthin	T-DNA
44238	X77_LES	6.93768e-07	coding	AT2G46180	USUALLY MULTIPLE ACIDS MOVE IN AND OUT TRANSPORTERS 9
46060	X167_Chlorosis.10	1.38865e-07	UTR	AT3G07650.1	DEVIL 9
46060	X2_LDV	7.50149e-07	UTR	AT3G07650.1	DEVIL 9
46815	X2_LDV	6.75292e-07	UTR	AT3G11810	ENTH/ANTH/VHS superfamily
47276	X2_LDV	1.05105e-07	dhs	AT3G13970.1	ATCYCD2;1
64810	X281_Storage.7.days	9.55308e-07	coding	AT3G63430
65213	X277_Secondary.Dormancy	9.77501e-09	coding	AT4G01080.1	TRICHOME BIREFRINGENCE-LIKE 26
65213	X46_8W.GH.LN	5.90478e-07	coding	AT4G01080.1	TRICHOME BIREFRINGENCE-LIKE 26
65291	X80_LN10	2.8999e-13	intron	AT4G01390.1	TRAF-like family protein	test intron retention	CAC CAA ACA TAC AAC AAT CTC CAA TAA G	CTT GAG CCA AAA TGG CAC AC	CCT CTT GGA TGA ACT TTA ATT CTC CAT TT
65677	X77_LES	8.27541e-07	intron	AT4G02260
73034	X9_Emco5	3.71162e-07	intron	AT4G10310
73178	X1_LD	5.09055e-07
79427	X17_Mg25	1.13024e-07	dhs	AT4G30140.1
80580	X2_LDV	2.05433e-07	intron	AT4G35130.1
81794	X77_LES	1.72434e-09	dhs	AT4G39980.1
83070	X4_SDV	2.27095e-07	dhs	AT5G06380.1
83235	X6_FT16	2.29827e-07	exon	AT5G07050.1
83239	X17_Mg25	1.48159e-09	dhs	AT5G07080.1
83458	X2_LDV	8.00996e-07	intron	AT5G07630
83988	X43_FLC	5.22786e-07	UTR	AT5G10278
84729	X2_LDV	3.12111e-08	intron	AT5G14060.1	lysine-sensitive aspartate kinase	test intron retention	GTT CCA AGT ATT TAG AAG CAA TGG AGT	GGA GAG CCC TCA CAC ATT G	CTC ATA TTA GAG AAG GTG TTC CAA GTA TTT
84729	X5_FT10	1.89427e-07	intron	AT5G14060.1	lysine-sensitive aspartate kinase	test intron retention
84730	X277_Secondary.Dormancy	2.04263e-08	UTR	AT5G14060.1	lysine-sensitive aspartate kinase
85970	X183_Trichome.avg.C	1.20013e-07	UTR	AT5G19090.1
86275	X45_8W.GH.FT	6.97875e-07	UTR	AT5G20260
86275	X2_LDV	7.01827e-07	UTR	AT5G20260
86626	X2_LDV	3.67825e-07	intron	AT5G22035.1	UBIQUITIN-SPECIFIC PROTEASE 8
86626	X57_FT.Field	4.25706e-07	intron	AT5G22035.1	UBIQUITIN-SPECIFIC PROTEASE 8
89719	X77_LES	1.3906e-10	transposon	AT5TE37190
89719	X79_LY	8.81841e-07	transposon	AT5TE37190
89911	X167_Chlorosis.10	7.62946e-07	UTR	AT5G28442
95577	X75_FW	7.0579e-07	UTR	AT5G37510
97504	X18_P31	7.88074e-07	????
97613	X167_Chlorosis.10	9.4386e-07	UTR	AT5G41910
100701	X79_LY	6.40591e-09	coding	AT5G50150.1
103035	X169_Chlorosis.22	8.34658e-07	????
104167	X1_LD	1.98794e-07	UTR	AT5G63640
105036	X57_FT.Field	5.45133e-07	UTR	AT5G67245

## Sheet: assocs_120716
str	pheno	pval	gene	note	near_gwas_hit
47276	X1_LD	5.87e-07	AT3G13970.1	ATCYCD2;1
65213	X1_LD	1.95e-08	AT4G01080.1	TRICHOME BIREFRINGENCE-LIKE 26	etc3
65291	X1_LD	5.44e-11	AT4G01390.1	TRAF-like family protein
3692	X1_LD	3.65e-07
33085	X1_LD	1.07e-07
1424	X159_Silique.22	2.42e-07	AT1G07490.1
26127	X167_Chlorosis.10	3.25e-07	AT2G01600.1	CUTICLE DESTRUCTING FACTOR 1
46060	X167_Chlorosis.10	1.39e-07	AT3G07650.1	DEVIL 9
89911	X167_Chlorosis.10	7.63e-07	AT5G28442
97613	X167_Chlorosis.10	9.44e-07	AT5G41910
79427	X17_Mg25	1.13e-07	AT4G30140.1
83239	X17_Mg25	1.48e-09	AT5G07080.1
3077	X174_Leaf.serr.16	5.79e-07	AT1G14770
846	X2_LDV	9.39e-07	AT1G04660.1	duf
37195	X2_LDV	3.17e-10	AT2G22000	innate immune ELICITOR PEPTIDE 6 PRECURSOR
37359	X2_LDV	6.72e-07	AT2G22490.1	lysine-sensitive aspartate kinase	SVP
43970	X2_LDV	5.99e-09	AT2G44840
46060	X2_LDV	7.5e-07	AT3G07650.1	DEVIL 9
46815	X2_LDV	6.75e-07	AT3G11810	ENTH/ANTH/VHS superfamily
47276	X2_LDV	1.05e-07	AT3G13970.1	ATCYCD2;1
80580	X2_LDV	2.05e-07	AT4G35130.1
83458	X2_LDV	8.01e-07	AT5G07630
84729	X2_LDV	3.12e-08	AT5G14060.1
86275	X2_LDV	7.02e-07	AT5G20260	Exostosin family protein
86626	X2_LDV	3.68e-07	AT5G22035.1	UBIQUITIN-SPECIFIC PROTEASE 8
64810	X281_Storage.7.days	9.55e-07	AT3G63430
2479	X32_avrPphB	3.58e-07	AT1G12200
83070	X4_SDV	2.27e-07	AT5G06380.1
65291	X40_2W	4.27e-08	AT4G01390.1	TRAF-like family protein
37195	X42_8W	5.47e-08	AT2G22000	innate immune ELICITOR PEPTIDE 6 PRECURSOR
6864	X45_8W.GH.FT	4.04e-07	AT1G29900
86275	X45_8W.GH.FT	6.98e-07	AT5G20260	Exostosin family protein
37195	X46_8W.GH.LN	1.39e-07	AT2G22000	innate immune ELICITOR PEPTIDE 6 PRECURSOR
65213	X46_8W.GH.LN	1.64e-09	AT4G01080.1	TRICHOME BIREFRINGENCE-LIKE 26	CRY1
83070	X46_8W.GH.LN	3.73e-09	AT5G06380.1
86275	X46_8W.GH.LN	4.98e-07	AT5G20260	Exostosin family protein
64958	X46_8W.GH.LN	2.62e-07
846	X5_FT10	5.64e-08	AT1G04660.1	duf
84729	X5_FT10	1.89e-07	AT5G14060.1
37195	X57_FT.Field	1.54e-07	AT2G22000	innate immune ELICITOR PEPTIDE 6 PRECURSOR
86626	X57_FT.Field	4.26e-07	AT5G22035.1	UBIQUITIN-SPECIFIC PROTEASE 8
105036	X57_FT.Field	5.45e-07	AT5G67245
65291	X59_FT.GH	2.1e-07	AT4G01390.1	TRAF-like family protein	Etc3
1665	X6_FT16	2.71e-07	AT1G08720.1
3950	X6_FT16	1.23e-07	AT1G18750.1	AGL65
37359	X6_FT16	3.46e-07	AT2G22490.1	lysine-sensitive aspartate kinase	agl17
83235	X6_FT16	2.3e-07	AT5G07050.1
2503	X6_FT16	6.11e-07
33137	X77_LES	3.07e-09	AT2G13770.1	also diversifying
44238	X77_LES	6.94e-07	AT2G46180	USUALLY MULTIPLE ACIDS MOVE IN AND OUT TRANSPORTERS 9
81794	X77_LES	1.72e-09	AT4G39980.1
89719	X77_LES	1.39e-10	AT5TE37190
65677	X77_LES	8.28e-07	intron	AT4G02260
100701	X79_LY	6.41e-09	AT5G50150.1
89719	X79_LY	8.82e-07	AT5TE37190
45525	X8_Seed.Dormancy	2.04e-08
65291	X80_LN10	2.9e-13	AT4G01390.1	TRAF-like family protein
73034	X9_Emco5	3.71e-07	intron	AT4G10310

## Sheet: primers
id	seq
4806_intr_f	GAG CCA CAC ATG GTG GTT	25nm	STD
4806_intr_r	CACTATCAGCTACCAAAATCCATCTC	25nm	STD
6204_intr_f	TGA TCA ATA TTT CCT CCC TTG CTG	25nm	STD
6204_intr_r	CTA CTA TCG GTG AGG AAG TAC ATT TAA GA	25nm	STD
6204_RT_f	CCA GCG AAG GAA GTA GAC AGA	25nm	STD
65291_intr_f	CAC CAA ACA TAC AAC AAT CTC CAA TAA G	25nm	STD
65291_intr_r	CTT GAG CCA AAA TGG CAC AC	25nm	STD
65291_RT_f	CCT CTT GGA TGA ACT TTA ATT CTC CAT TT	25nm	STD
84729_intr_f	GTT CCA AGT ATT TAG AAG CAA TGG AGT	25nm	STD
84729_intr_r	GGA GAG CCC TCA CAC ATT G	25nm	STD
84729_RT_f	CTC ATA TTA GAG AAG GTG TTC CAA GTA TTT	25nm	STD
7150_intr_span	GTT TAT GTG GCA AAG ATG GGA CA	25nm	STD

## Sheet: t-dnas
str	gene	t-dna1	t-dna2	need primers		phenotype
846	AT1G04660.1	SALK_048236.22.40.x		y		flowering(+V)
3950	AT1G18750.1	CS66251	SALK_089371.43.30.x	y		flowering, fresh weight
6204	AT1G27570.1	SALK_138389.43.40.x	SALK_054560.24.85.x	n		leaf yellowing, lesions, flowering
33137	AT2G13770.1	none	none	y		lesions
37195	AT2G22000	SALK_017009	SALK_141702.39.50.x	y		flowering
43970	AT2G44840	GK-531G01-020366	GK-121A12-012552	y	cs314316	flowering
65291	AT4G01390.1	SALK_113736.52.85.x		n		flowering, LN10
84729	AT5G14060.1	SALK_151535.56.00.x	SALK_151535.56.00.x	n		flowering,dormancy
