# Supplementary material for: Massive variation of short tandem repeats with functional consequences across strains of Arabidopsis thaliana
Source: HighWire-hosted journal article supplement (doi:10.1101/gr.231753.117), 2018-07-03
Supplement: Supplemental_File_S4.zip [file strwa_tdnas_validate_expt_123016.xlsx]

## Sheet: data
seedling_number	genotype_label	tray_number	tray_row	tray_col	treatment	RLN	DTF	note
1	1	1	1	1		13	29	WT/WT
2	2	1	1	2		10	27
3	3	1	1	3		11	26
4	4	1	1	4		9	26	3_cots
5	5	1	1	5		11	27
6	6	1	1	6		9	27
7	1	1	1	7		10	26	mu/mu
8	2	1	1	8		12	27
9	3	1	1	9		12	27
10	4	1	1	10		12	27
11	5	1	1	11		11	25
12	6	1	1	12		13	33
13	2	1	2	1		11	26
14	3	1	2	2		11	26
15	4	1	2	3		11	27
16	5	1	2	4		11	27
17	6	1	2	5		12	28
18	1	1	2	6		12	28	WT/WT
19	2	1	2	7		11	25
20	3	1	2	8		11	26
21	4	1	2	9		10	26	eaten?
22	5	1	2	10		12	29
23	6	1	2	11		10	28
24	1	1	2	12		10	26	mu/mu
25	3	1	3	1		11	26
26	4	1	3	2		11	29
27	5	1	3	3		11	27
28	6	1	3	4		13	30
29	1	1	3	5		12	33	WT/WT
30	2	1	3	6		11	26
31	3	1	3	7		10	26
32	4	1	3	8		12	27
33	5	1	3	9		12	27
34	6	1	3	10		12	30
35	1	1	3	11		13	34	weird mu/mu
36	2	1	3	12		11	27
37	4	1	4	1		9	24
38	5	1	4	2		12	28
39	6	1	4	3		11	28
40	1	1	4	4		13	28	WT/WT
41	2	1	4	5		11	26
42	3	1	4	6		13	28
43	4	1	4	7		10	25
44	5	1	4	8		11	26
45	6	1	4	9		13	29		mu/mu	mu/WT	WT/WT
46	1	1	4	10		12	28	mu/WT	25.6667	27	29.2
47	2	1	4	11		11	26		9.66667	11.3333	12.2
48	3	1	4	12		11	25		0.57735	1.73205	2.16795
49	5	1	5	1		12	29		0.57735	1.1547	0.83666
50	6	1	5	2		11	26
51	1	1	5	3		11	28	WT/WT
52	2	1	5	4		9	27
53	3	1	5	5		11	27
54	4	1	5	6		10	26
55	5	1	5	7		10	26
56	6	1	5	8		11	28
57	1	1	5	9		10	25	mu/WT
58	2	1	5	10		11	27
59	3	1	5	11		10	26
60	4	1	5	12		13	28
61	6	1	6	1		11	28
62	1	1	6	2		12	28	mu/WT
63	2	1	6	3		11	26
64	3	1	6	4		9	23
65	4	1	6	5		11	25
66	5	1	6	6		11	26
67	6	1	6	7		10	29
68	1	1	6	8		9	25	mu/mu
69	2	1	6	9		12	27
70	3	1	6	10		11	25
71	4	1	6	11		11	28
72	5	1	6	12		14	28

## Sheet: other
seedling_number	genotype_label	tray_number	tray_row	tray_col	treatment	RLN	DTF	note
1	1	1	1	1								RLN	DTF
7	1	1	1	7		10	26				1	11	26.8889
18	1	1	2	6		12	28				2	10.9167	26.9
24	1	1	2	12		10	26				3	10.9167	25.9167
29	1	1	3	5							4	10.75	26.5
35	1	1	3	11				weird?			5	11.5	27.0833
40	1	1	4	4		13	28				6	11.1	28.4
46	1	1	4	10		12	28
51	1	1	5	3		11	28
57	1	1	5	9		10	25
62	1	1	6	2		12	28
68	1	1	6	8		9	25
2	2	1	1	2		10	27
8	2	1	1	8		12	27
13	2	1	2	1		11	26
19	2	1	2	7		11	25
30	2	1	3	6		11	26
36	2	1	3	12		11	27
41	2	1	4	5		11	26
47	2	1	4	11		11	26
52	2	1	5	4		9	27
58	2	1	5	10		11	27
63	2	1	6	3		11	26
69	2	1	6	9		12	27
3	3	1	1	3		11	26
9	3	1	1	9		12	27
14	3	1	2	2		11	26
20	3	1	2	8		11	26
25	3	1	3	1		11	26
31	3	1	3	7		10	26
42	3	1	4	6		13	28
48	3	1	4	12		11	25
53	3	1	5	5		11	27
59	3	1	5	11		10	26
64	3	1	6	4		9	23
70	3	1	6	10		11	25
4	4	1	1	4		9	26	3_cots
10	4	1	1	10		12	27
15	4	1	2	3		11	27
21	4	1	2	9		10	26	eaten?
26	4	1	3	2		11	29
32	4	1	3	8		12	27
37	4	1	4	1		9	24
43	4	1	4	7		10	25
54	4	1	5	6		10	26
60	4	1	5	12		13	28
65	4	1	6	5		11	25
71	4	1	6	11		11	28
5	5	1	1	5		11	27
11	5	1	1	11		11	25
16	5	1	2	4		11	27
22	5	1	2	10		12	29
27	5	1	3	3		11	27
33	5	1	3	9		12	27
38	5	1	4	2		12	28
44	5	1	4	8		11	26
49	5	1	5	1		12	29
55	5	1	5	7		10	26
66	5	1	6	6		11	26
72	5	1	6	12		14	28
6	6	1	1	6		9	27
12	6	1	1	12		13	33
17	6	1	2	5		12	28
23	6	1	2	11		10	28
28	6	1	3	4
34	6	1	3	10
39	6	1	4	3		11	28
45	6	1	4	9		13	29
50	6	1	5	2		11	26
56	6	1	5	8		11	28
61	6	1	6	1		11	28
67	6	1	6	7		10	29

## Sheet: mapping
mapping of randomized keys to genotypes:
1	SALK113736
2	SALK048236
3	CS314316
4	SALK141702
5	Col
6	SALK017005
