# Supplementary material for: Massive variation of short tandem repeats with functional consequences across strains of Arabidopsis thaliana
Source: HighWire-hosted journal article supplement (doi:10.1101/gr.231753.117), 2018-07-03
Supplement: Supplemental_File_S4.zip [file strwa_tdnas_validate_expt_newseeds_012017.xlsx]

## Sheet: strwa_tdnas_validate_expt_newse
seedling_number	genotype_label	tray_number	tray_row	tray_col	treatment	DTF	RLN	notes	113736_geno
1	1	1	1	1		45	21
2	2	1	1	2		34	16
3	3	1	1	3		35	15	sad
4	4	1	1	4		27	11	sad2	?
5	5	1	1	5		30	14	sad
6	6	1	1	6		36	19
7	1	1	1	7		44	16
8	2	1	1	8		38	19
9	3	1	1	9		NA	NA
10	4	1	1	10		33	13		mu/mu
11	5	1	1	11		NA	NA	sad3
12	6	1	1	12		NA	NA
13	2	1	2	1		38	13	sad
14	3	1	2	2		40	19
15	4	1	2	3		36	9	sad2	mu/mu
16	5	1	2	4		36	15
17	6	1	2	5		32	14
18	1	1	2	6		42	18
19	2	1	2	7		39	16
20	3	1	2	8		34	10	sad2
21	4	1	2	9		35	16	sad	mu/mu
22	5	1	2	10				sad2
23	6	1	2	11		36	18
24	1	1	2	12		45	19
25	3	1	3	1		34	13	sad
26	4	1	3	2		35	16	sad	mu/mu
27	5	1	3	3		35	14
28	6	1	3	4		35	15
29	1	1	3	5		38	16
30	2	1	3	6		28	11
31	3	1	3	7		33	16
32	4	1	3	8		39	15		WT/WT
33	5	1	3	9		39	13	sad2
34	6	1	3	10		35	13	sad2
35	1	1	3	11		NA	NA	sad3
36	2	1	3	12		NA	NA	sad3
37	4	1	4	1		33	15		WT/WT
38	5	1	4	2		NA	NA	sad3
39	6	1	4	3		32	14
40	1	1	4	4		38	16	sad2
41	2	1	4	5		32	17
42	3	1	4	6		36	15
43	4	1	4	7				sad2
44	5	1	4	8		35	13	sad
45	6	1	4	9		42	17
46	1	1	4	10		NA	NA	sad3
47	2	1	4	11		35	14	sad
48	3	1	4	12		39	15
49	5	1	5	1		34	14	sad
50	6	1	5	2		NA	NA	sad3
51	1	1	5	3		NA	NA	sad3
52	2	1	5	4		30	12	sad2
53	3	1	5	5		30	12
54	4	1	5	6		36	12	sad2	WT/WT
55	5	1	5	7		35	13	sad2
56	6	1	5	8		36	14
57	1	1	5	9		31	14
58	2	1	5	10		NA	NA	sad3
59	3	1	5	11		NA	NA	sad3
60	4	1	5	12		35	12	sad2	mu/mu
61	6	1	6	1		NA	NA	sad3
62	1	1	6	2		31	10	sad
63	2	1	6	3		31	13
64	3	1	6	4		34	9	sad2
65	4	1	6	5		42	14	sad1.5	mu/mu
66	5	1	6	6		36	14
67	6	1	6	7		38	15
68	1	1	6	8		43	14
69	2	1	6	9		33	11
70	3	1	6	10		28	10	sad2
71	4	1	6	11				sad2
72	5	1	6	12		44	15	sad

## Sheet: mapping
mapping	of	randomized	keys	to	genotypes:
1	Col
2	SALK141702
3	CS66521
4	SALK113736
5	SALK017005
6	SALK138389
