# Supplementary material for: Massive variation of short tandem repeats with functional consequences across strains of Arabidopsis thaliana
Source: HighWire-hosted journal article supplement (doi:10.1101/gr.231753.117), 2018-07-03
Supplement: Supplemental_File_S4.zip [file table_strwa_snpcontrol.xlsx]

## Sheet: Sheet1
Phenotype	STR	SNP	Model	Log(L)	df	n	AIC	AICc
X2_LDV	-	-	Y ~ K	-408.93	1	94	819.86	819.903
X2_LDV	37195	-	Y ~ STR+K	-385.335	4	94	778.671	779.12
X2_LDV	-	snp.2.9598635	Y ~ SNP+K	-396.214	2	94	796.427	796.559
X2_LDV	37195	snp.2.9598635	Y ~ STR+SNP+K	-378.973	5	94	767.946	768.627
X1_LD	-	-	Y ~ K	-435.563	1	95	873.127	873.17
X1_LD	65291	-	Y ~ STR+K	-401.977	10	95	823.954	826.573
X1_LD	-	snp.4.454542	Y ~ SNP+K	-413.085	2	95	830.17	830.301
X1_LD	65291	snp.4.454542	Y ~ STR+SNP+K	-386.805	11	95	795.609	798.79
X6_FT16	-	-	Y ~ K	-385.203	1	95	772.407	772.45
X6_FT16	1665	-	Y ~ STR+K	-370.082	3	95	746.165	746.429
X6_FT16	-	snp.1.2778963	Y ~ SNP+K	-380.023	2	95	764.045	764.176
X6_FT16	1665	snp.1.2778963	Y ~ STR+SNP+K	-369.07	4	95	746.14	746.584
X32_avrPphB	-	-	Y ~ K	-52.2574	1	72	106.515	106.572
X32_avrPphB	2479	-	Y ~ STR+K	-28.6504	10	72	22.9237	26.5302
X32_avrPphB	-	snp.1.4143163	Y ~ SNP+K	-1.46184	2	72	-22.0379	-21.8639
X32_avrPphB	2479	snp.1.4143163	Y ~ STR+SNP+K	13.0189	11	72	-4.03786	0.36214
X1_LD	-	-	Y ~ K	-435.563	1	95	873.127	873.17
X1_LD	3692	-	Y ~ STR+K	-416.527	6	95	845.053	846.008
X1_LD	-	snp.1.6371576	Y ~ SNP+K	-424.224	2	95	852.448	852.578
X1_LD	3692	-	Y ~ STR+SNP+K	-413.301	7	95	840.603	841.89
X6_FT16	-	-	Y ~ K	-385.203	1	95	772.407	772.45
X6_FT16	3950	-	Y ~ STR+K	-371.218	2	95	746.435	746.566
X6_FT16	-	snp.1.6369772	Y ~ SNP+K	-375.029	2	95	754.059	754.189
X6_FT16	3950	snp.1.6369772	Y ~ STR+SNP+K	-370.34	3	95	746.68	746.944
X45_8W.GH.FT	-	-	Y ~ K	-376.904	1	89	755.807	755.853
X45_8W.GH.FT	6864	-	Y ~ STR+K	-359.257	5	89	728.514	729.237
X45_8W.GH.FT	-	snp.1.10458712	Y ~ SNP+K	-371.512	2	89	747.023	747.163
X45_8W.GH.FT	6864	snp.1.10458712	Y ~ STR+SNP+K	-359.041	6	89	730.083	731.107
X6_FT16	-	-	Y ~ K	-385.203	1	95	772.407	772.45
X6_FT16	37359	-	Y ~ STR+K	-364.898	7	95	743.797	745.084
X6_FT16	-	snp.2.9581605	Y ~ SNP+K	-380.227	2	95	764.454	764.584
X6_FT16	37359	snp.2.9581605	Y ~ STR+SNP+K	-364.653	8	95	745.305	746.98
X2_LDV	-	-	Y ~ K	-408.93	1	94	819.86	819.903
X2_LDV	43970	-	Y ~ STR+K	-380.623	10	94	781.246	783.896
X2_LDV	-	snp.2.18439471	Y ~ SNP+K	-379.748	2	94	763.495	763.627
X2_LDV	43970	snp.2.18439471	Y ~ STR+SNP+K	-371.296	11	94	764.592	767.811
X46_8W.GH.LN	-	-	Y ~ K	-392.857	1	89	787.714	787.76
X46_8W.GH.LN	65213	-	Y ~ STR+K	-363.082	10	89	746.163	748.984
X46_8W.GH.LN	-	snp.4.500090	Y ~ SNP+K	-385.905	2	89	775.811	775.95
X46_8W.GH.LN	65213	snp.4.500090	Y ~ STR+SNP+K	-359.552	11	89	741.103	744.532
X46_8W.GH.LN	-	-	Y ~ K	-191.367	1	48	384.735	384.822
X46_8W.GH.LN	83070	-	Y ~ STR+K	-156.148	16	48	344.297	361.845
X46_8W.GH.LN	-	snp.5.2002340	Y ~ SNP+K	-179.99	2	48	363.981	364.248
X46_8W.GH.LN	83070	snp.5.2002340	Y ~ STR+SNP+K	-155.988	17	48	345.977	366.377
X6_FT16	-	-	Y ~ K	-376.624	1	93	755.247	755.291
X6_FT16	83235	-	Y ~ STR+K	-358.381	5	93	726.761	727.451
X6_FT16	-	snp.5.2095951	Y ~ SNP+K	-359.164	2	93	722.329	722.462
X6_FT16	83235	snp.5.2095951	Y ~ STR+SNP+K	-355.891	6	93	723.782	724.759
X17_Mg25	-	-	Y ~ K	-398.248	1	86	798.495	798.543
X17_Mg25	83239	-	Y ~ STR+K	-371.999	7	86	757.999	759.435
X17_Mg25	-	snp.5.2339456	Y ~ SNP+K	-383.058	2	86	770.116	770.26
X17_Mg25	83239	snp.5.2339456	Y ~ STR+SNP+K	-369.806	8	86	755.611	757.482
X46_8W.GH.LN	-	-	Y ~ K	-392.857	1	89	787.714	787.76
X46_8W.GH.LN	86275	-	Y ~ STR+K	-378.345	3	89	762.69	762.972
X46_8W.GH.LN	-	snp.5.6690646	Y ~ SNP+K	-389.69	2	89	783.38	783.52
X46_8W.GH.LN	86275	snp.5.6690646	Y ~ STR+SNP+K	-378.07	4	89	764.139	764.615
X57_FT.Field	-	-	Y ~ K	-449.382	1	95	900.763	900.806
X57_FT.Field	86626	-	Y ~ STR+K	-425.976	10	95	871.953	874.572
X57_FT.Field	-	snp.5.7382860	Y ~ SNP+K	-447.16	2	95	898.32	898.45
X57_FT.Field	86626	snp.5.7382860	Y ~ STR+SNP+K	-421.289	11	95	864.578	867.759
