# Supplementary material for: Massive variation of short tandem repeats with functional consequences across strains of Arabidopsis thaliana
Source: HighWire-hosted journal article supplement (doi:10.1101/gr.231753.117), 2018-07-03
Supplement: Supplemental_Tables.xlsx [file Supplemental_Tables.xlsx]

## Sheet: Supplemental Table 1
Supplementary Table 1. Performance of various BWA parameter sets on calling STR allele length in Col-0 (algorithm, open, extend, mismatch, alignment score threshold) by various metrics (proportion STRs typed, proportion STRs correct, correlation with correct alleles, overall accuracy).
algorithm	open_cost	extend_cost	mismatch_cost	AS_threshold	prop_typed	Prop_correct	Correlation	Accuracy
MEM	0	0	4	160	0.829	0.747	0.858	0.619
MEM	0	1	4	160	0.838	0.806	0.99	0.675
MEM	0	2	4	160	0.837	0.907	0.995	0.76
MEM	0	4	4	160	0.833	0.959	0.997	0.799
MEM	1	0	4	160	0.833	0.774	0.958	0.644
MEM	1	1	4	160	0.835	0.84	0.993	0.701
MEM	1	2	4	160	0.834	0.955	0.997	0.797
MEM	1	4	4	160	0.83	0.957	0.997	0.794
MEM	2	0	4	160	0.832	0.813	0.965	0.677
MEM	2	1	4	160	0.833	0.933	0.996	0.778
MEM	2	2	0	145	0.818	0.774	0.451	0.633
MEM	2	2	0	150	0.814	0.779	0.433	0.634
MEM	2	2	0	155	0.811	0.781	0.413	0.634
MEM	2	2	0	160	0.815	0.778	0.436	0.634
MEM	2	2	1	145	0.851	0.952	0.977	0.811
MEM	2	2	1	150	0.847	0.957	0.991	0.811
MEM	2	2	1	155	0.845	0.958	0.992	0.81
MEM	2	2	1	160	0.846	0.957	0.991	0.811
MEM	2	2	2	145	0.845	0.95	0.982	0.804
MEM	2	2	2	150	0.844	0.953	0.991	0.805
MEM	2	2	2	155	0.842	0.957	0.993	0.806
MEM	2	2	2	160	0.845	0.952	0.992	0.805
MEM	2	2	4	160	0.833	0.957	0.997	0.798
MEM	2	4	4	160	0.824	0.965	0.998	0.796
MEM	4	0	4	160	0.83	0.916	0.986	0.761
MEM	4	1	4	160	0.83	0.934	0.997	0.776
MEM	4	2	4	160	0.824	0.96	0.997	0.791
MEM	4	4	4	160	0.816	0.967	0.998	0.79
MEM	6	0	4	160	0.824	0.927	0.986	0.764
MEM	6	1	4	160	0.821	0.949	0.997	0.78
MEM	6	2	4	160	0.817	0.965	0.998	0.789
MEM	6	4	4	160	0.773	0.961	0.997	0.743
SW	1	1	4	160	0.835	0.894	0.994	0.746
SW	1	2	4	160	0.663	0.741	0.978	0.492
SW	1	4	4	160	0.83	0.958	0.997	0.796
SW	2	1	4	160	0.712	0.681	0.958	0.485
SW	2	2	4	160	0.83	0.957	0.997	0.795
SW	2	4	4	160	0.827	0.964	0.997	0.797
SW	4	1	4	160	0.83	0.948	0.997	0.787
SW	4	2	4	160	0.827	0.962	0.997	0.797
SW	4	4	4	160	0.817	0.971	0.997	0.794
SW	5	1	4	160	0.824	0.966	0.997	0.796
SW	6	1	4	160	0.785	0.958	0.996	0.752
SW	6	2	4	160	0.818	0.97	0.997	0.794
SW	6	4	4	160	0.809	0.975	0.998	0.789

## Sheet: Supplemental Table 2
Supplemental Table S2. STRs showing modest expansions (expansion score >=2) in at least one strain.
ID	Number of units	Purity	Motif	Locus size	annotation	chr	start	stop	gene	Expansion Score
65400	6.7	100	CAA	20.1	intron	Chr4	672378	672397	AT4G01540	5.92593
47883	10	100	AT	20	UTR	Chr3	5587549	5587568	AT3G16440	4.5
89068	10	100	TA	20	Intergenic	Chr5	9760426	9760445	AT5TE35475	4.33333
2539	6.7	100	AGA	20.1	coding	Chr1	4261712	4261731	AT1G12490	3.73134
5427	8.5	90	TATA	34	intron	Chr1	8541165	8541198	AT1G24145	3.6
19084	7.3	100	CTT	21.9	UTR	Chr1	21181668	21181689	AT1G56540	3.42466
15746	7.3	100	AGA	21.9	coding	Chr1	17436847	17436868	AT1G47510	3.15068
25619	9	91	TCT	27	UTR	Chr1	30082339	30082365	AT1G79970	3
7358	8.7	91	TTC	26.1	intron	Chr1	11087597	11087622	AT1G31070	2.98851
414	13	94	GAA	39	UTR	Chr1	641971	642008	AT1G08815	2.77778
95706	7	100	TCA	21	UTR	Chr5	15004737	15004757	AT5G37780	2.75
41915	11	100	AT	22	intron	Chr2	15267011	15267032	AT2G36390	2.7
84110	6.7	100	AGG	20.1	UTR	Chr5	3433738	3433757	AT5G10880	2.68657
45985	10	100	TC	20	Intergenic	Chr3	2321443	2321462	NA	2.66667
77933	8	100	TGA	24	UTR	Chr4	12336368	12336391	AT4G23680	2.625
32842	11.3	100	GAA	33.9	Intergenic	Chr2	5490658	5490691	NA	2.56637
7150	12.5	100	AG	25	intron	Chr1	10817051	10817075	AT1G30540	2.51852
100082	6.7	94	CTCCGG	40.2	coding	Chr5	19584200	19584239	AT5G48320	2.45614
35201	8	100	ACC	24	coding	Chr2	7039826	7039849	AT2G16250	2.375
5792	14.5	92	AG	29	intron	Chr1	9023890	9023918	AT1G26100	2.35294
33137	8.7	91	TCT	26.1	coding	Chr2	5736639	5736664	AT2G13770	2.29885
97752	8.3	95	CAC	24.9	coding	Chr5	16915919	16915944	AT5G42310	2.28916
74375	6	100	CAAGAA	36	UTR	Chr4	7654240	7654275	AT4G13160	2.2
103981	8.3	100	ATG	24.9	Intergenic	Chr5	25146813	25146837	NA	2.16867
81607	7	100	AGA	21	UTR	Chr4	18243655	18243675	AT4G39170	2.16667
43048	12.3	94	TTC	36.9	UTR	Chr2	16925770	16925806	AT2G40520	2.15054
96928	9	91	CAT	27	Intergenic	Chr5	16009433	16009459	NA	2.11111
47029	18	94	CT	36	UTR	Chr3	4136084	4136119	AT3G12955	2

## Sheet: Supplemental Table 3
Supplemental Table S3. Frequency of coding STR amino acid composition compared to A. thaliana proteome (Karlin et al. 2002).
Amino Acid	Proteome frequency1	count	Purifying frequency1	Standard error	Fold enrichment
A	0.063	0	0	0	0
C	0.001	0	0	0	0
D	0.084	9	0.142857	0.0440867	1.70068
E	0.158	18	0.285714	0.0569156	1.80832
F	0.012	1	0.015873	0.0157465	1.32275
G	0.11	5	0.0793651	0.0340556	0.721501
H	0.027	2	0.031746	0.0220886	1.17578
I	0.001	1	0.015873	0.0157465	15.873
K	0.072	7	0.111111	0.0395943	1.54321
L	0.052	1	0.015873	0.0157465	0.30525
M	0.004	1	0.015873	0.0157465	3.96825
N	0.05	4	0.0634921	0.0307217	1.26984
P	0.104	1	0.015873	0.0157465	0.152625
Q	0.058	1	0.015873	0.0157465	0.273673
R	0.021	0	0	0	NA
S	0.334	8	0.126984	0.0419484	0.380192
T	0.035	1	0.015873	0.0157465	0.453515
V	0.011	1	0.015873	0.0157465	1.443
W	0	0	0	0	NA
Y	0	0	0	0	NA
1: Proportion of proteins with an amino acid run with at least one of the indicated type (does not sum to 1).

## Sheet: Supplemental Table 4
Supplemental Table S4. STR-expression associations in cis (FDR < 0.5 for 1MB STRs, 0.1 for others).
STR	gene	beta	t-stat	p-value	FDR
STRs within 1MB of affected genes
77418	AT4G21670	-0.726601	-6.50579	2.43e-06	0.202737
80659	AT4G33120	0.862124	6.29153	3.84e-06	0.202737
100562	AT5G48090	-1.37833	-5.95691	7.96e-06	0.251369
77418	AT4G21860	0.772661	5.78392	1.17e-05	0.251369
83137	AT5G06660	-0.904907	-5.75807	1.24e-05	0.251369
99144	AT5G44565	-1.76613	-5.67218	1.5e-05	0.251369
99144	AT5G47770	2.02117	5.62418	1.67e-05	0.251369
85241	AT5G18860	0.898199	5.54508	1.99e-05	0.262643
43830	AT2G43950	-1.90997	-5.22635	4.09e-05	0.450428
1840	AT1G11350	-1.60739	-5.14077	4.98e-05	0.450428
82895	AT5G03770	-2.56872	-5.13032	5.1e-05	0.450428
21447	AT1G62640	-0.608653	-5.09973	5.47e-05	0.450428
104448	AT5G62540	-0.989527	-5.09351	5.55e-05	0.450428
39206	AT2G28130	-2.02993	-5.05053	6.12e-05	0.461566
46518	AT3G10640	0.914438	5.00401	6.81e-05	0.479364
84539	AT5G10946	1.51324	4.97351	7.3e-05	0.48205
STRs within 100KB of affected genes
STR_77418	AT4G21670	-0.730803	-6.82748	9.47e-07	0.0675599
STRs within 10KB of affected genes
STR_21123	AT1G63880	1.20841	6.16135	4.11e-06	0.0338983
STR_83137	AT5G06660	-0.915424	-5.69479	1.19e-05	0.0489308
STR_8109	AT1G32583	-0.834192	-5.2862	3.06e-05	0.0841407
STR_43830	AT2G43950	-1.88386	-5.14778	4.23e-05	0.0872968
STRs within 1KB of affected genes
STR_83137	AT5G06660	-0.915424	-5.69479	1.19e-05	0.022141
STR_41951	AT2G36550	-0.582994	-4.76546	0.000104	0.0667327
STR_73034	AT4G10310	-0.921516	-4.58976	0.000159	0.0667327
STR_44826	AT3G01790	0.345563	4.54812	0.000175	0.0667327
STR_1354	AT1G07025	-0.275285	-4.4407	0.000227	0.0667327
STR_77555	AT4G22280	2.14278	4.42832	0.000233	0.0667327
STR_44903	AT3G02390	1.33862	4.36821	0.000269	0.0667327
STR_79636	AT4G30910	0.204762	4.34324	0.000286	0.0667327
STR_83557	AT5G08020	-1.42562	-4.28053	0.000332	0.0689141
STR_44048	AT2G45170	-0.444101	-4.1577	0.000446	0.075908
STR_63630	AT3G58020	1.00551	4.15621	0.000447	0.075908

## Sheet: Supplemental Table 5
Supplementary Table 5. STR-phenotype associations and with relevant information.
ID	Phenotype	P-value	gene	note	Nearby GWA SNP
740	279_DSDS50	1.77e-09	AT1G04350		none
740	281_Storage.7.days	2.54e-09	AT1G04350
740	282_Storage.28.days	4.73e-09	AT1G04350		none
740	8_Seed.Dormancy	8.25e-09	AT1G04350
740	283_Storage.56.days	3.1e-08	AT1G04350
1175	279_DSDS50	4.16e-07	AT1G06070		1 : 1921587
1665	47_0W.GH.FT	1.73e-11	AT1G08720.1		1 : 2778963
2479	32_avrPphB	3.58e-07	AT1G12200		1 : 4143163
2503	47_0W.GH.FT	3.26e-12			no
3692	6_FT16	8e-11	AT1G17920		1 : 6369772
3950	47_0W.GH.FT	4.16e-16	AT1G18750.1	AGL65	1 : 6371576
3950	7_FT22	5.25e-16	AT1G18750.1	AGL65	1 : 6369772
3950	6_FT16	3.6e-15	AT1G18750.1	AGL65	1 : 6369772
3950	1_LD	6.32e-13	AT1G18750.1	AGL65	1 : 6369772
3950	40_2W	3.3e-11	AT1G18750.1	AGL65
3950	59_FT.GH	3.99e-11	AT1G18750.1	AGL65
3950	41_4W	4.37e-11	AT1G18750.1	AGL65
3950	279_DSDS50	2.39e-08	AT1G18750.1	AGL65
3950	281_Storage.7.days	4.56e-08	AT1G18750.1	AGL65
3950	8_Seed.Dormancy	2.14e-07	AT1G18750.1	AGL65
4806	277_Secondary.Dormancy	9.32e-07	AT1G21970		1 : 7785207
6016	47_0W.GH.FT	5.45e-11	AT1G26910		no
16984	47_0W.GH.FT	5.53e-11	AT1G50410		none
16984	7_FT22	7.36e-11	AT1G50410		none
25087	279_DSDS50	2.78e-07	AT1G77950		none
25087	8_Seed.Dormancy	3.75e-07	AT1G77950
26127	167_Chlorosis.10	3.25e-07	AT2G01600.1	CUTICLE DESTRUCTING FACTOR 1	no
28690	61_LC.Duration.GH	7.87e-08	AT2G05920		no
28690	62_LFS.GH	1.24e-07	AT2G05920
33085	47_0W.GH.FT	7.88e-11	AT2G13680		no
33137	77_LES	3.07e-09	AT2G13770.1	also diversifying	no
37035	279_DSDS50	5.32e-07	AT2G21390		no
37079	279_DSDS50	5.49e-08	AT2G21390		no
37079	281_Storage.7.days	6.64e-07	AT2G21530
37359	47_0W.GH.FT	7.68e-20	AT2G22490.1		2 : 9602595
37359	7_FT22	5.29e-19	AT2G22490.1		2 : 9599711
37359	6_FT16	3.63e-16	AT2G22490.1		2 : 9581605
37359	1_LD	3.49e-14	AT2G22490.1	lysine-sensitive aspartate kinase	2 : 9581436
37359	41_4W	4.21e-13	AT2G22490.1
37359	40_2W	8.78e-13	AT2G22490.1
37359	59_FT.GH	7.99e-12	AT2G22490.1
37359	17_Mg25	4.05e-07	AT2G22490.1	lysine-sensitive aspartate kinase	2 : 9581605
37359	279_DSDS50	4.19e-07	AT2G22490.1
37359	281_Storage.7.days	8.59e-07	AT2G22490.1
38510	61_LC.Duration.GH	9.97e-07	AT2G25180		no
41068	7_FT22	4.06e-11	AT2G32790		2 : 13886899
43058	7_FT22	2.88e-14	AT2G40620		none
43058	47_0W.GH.FT	1.29e-13	AT2G40620		2 : 16917776
43058	6_FT16	2.23e-13	AT2G40620
43058	1_LD	1.16e-11	AT2G40620
43058	279_DSDS50	1.74e-07	AT2G40620
43058	281_Storage.7.days	2.66e-07	AT2G40620
43114	281_Storage.7.days	1.52e-07	AT2G40820		no
43114	279_DSDS50	1.82e-07	AT2G40820
43898	281_Storage.7.days	6.49e-09	AT2G44430		no
43898	279_DSDS50	3.98e-08	AT2G44430
43970	1_LD	2.24e-13	AT2G44840	ATERF13	2 : 18439471
43970	47_0W.GH.FT	3.29e-13	AT2G44840
43970	7_FT22	1.04e-12	AT2G44840		2 : 18439471
43970	2_LDV	2.94e-12	AT2G44840
43970	59_FT.GH	7.73e-12	AT2G44840
43970	6_FT16	1.07e-11	AT2G44840
44238	77_LES	6.94e-07	AT2G46180	USUALLY MULTIPLE ACIDS MOVE IN AND OUT TRANSPORTERS 9	no
44240	41_4W	1.37e-11	AT2G46190		no
46060	47_0W.GH.FT	8.38e-11	AT3G07650.1	col9; http://onlinelibrary.wiley.com/doi/10.1111/j.1365-313.2005.02491./full	no
46060	167_Chlorosis.10	1.39e-07	AT3G07650.1	DEVIL 9	no
46800	7_FT22	2.71e-11	AT3G11720		no
49282	8_Seed.Dormancy	7.62e-08	AT3G22104		no
62097	282_Storage.28.days	2.91e-07	AT3G51580		no
64896	8_Seed.Dormancy	7.46e-07	AT4G00180		no
65213	277_Secondary.Dormancy	4.24e-07	AT4G01080.1	TRICHOME BIREFRINGENCE-LIKE 26	4 : 429928
65291	6_FT16	2.75e-13	AT4G01390.1	TRAF-like family protein	4 : 581120
65291	80_LN10	1.45e-12	AT4G01390.1
65291	1_LD	9.04e-12	AT4G01390.1	TRAF-like family protein	done
65291	7_FT22	3.34e-11	AT4G01390.1	TRAF-like family protein
65291	47_0W.GH.FT	5.59e-11	AT4G01390.1	TRAF-like family protein	done
65677	281_Storage.7.days	4.19e-07	AT4G02260
65677	186_Bacterial.titer	7.13e-07	AT4G02260		no
65677	77_LES	8.28e-07	AT4G02260
66655	8_Seed.Dormancy	2.51e-10	AT4G03940		no
70913	8_Seed.Dormancy	2.67e-08	AT4G08103		no
73034	9_Emco5	3.71e-07	AT4G10310		no
79427	17_Mg25	3.28e-07	AT4G30140.1		no
79884	279_DSDS50	3.75e-07	AT4G31980		no
81421	47_0W.GH.FT	4.31e-15			none
81421	7_FT22	1.7e-14			none
81421	6_FT16	5.97e-13
81421	1_LD	5.93e-12
81421	279_DSDS50	1.57e-08			no
81421	281_Storage.7.days	2.41e-07
81421	8_Seed.Dormancy	3.95e-07
81794	77_LES	1.72e-09	AT4G39980; AT4G09985	atraba4b; lncRNA	no
82895	8_Seed.Dormancy	3.49e-08	AT5G07060		no
83235	7_FT22	4.86e-12	AT5G07060	MOS4-ASSOCIATED COMPLEX SUBUNIT 5C	5 : 2265385
83235	47_0W.GH.FT	1.96e-11	AT5G07060	“	5 : 2185406
83235	279_DSDS50	3.35e-11	AT5G07060
83235	281_Storage.7.days	1.21e-10	AT5G07060	“
83235	8_Seed.Dormancy	1.95e-09	AT5G07060	“
83239	17_Mg25	3.8e-09	AT5G07080.1		5 : 2339456
83458	47_0W.GH.FT	2.65e-13	AT5G07630		no
83458	7_FT22	7.22e-11	AT5G07630		5 : 2337756
83682	279_DSDS50	2.11e-07	AT5G08510		no
83682	281_Storage.7.days	5.52e-07	AT5G08510
83692	281_Storage.7.days	5.13e-07	AT5G08600
83692	279_DSDS50	6.14e-07	AT5G08600		no
84219	61_LC.Duration.GH	1.79e-07	AT5G11380		no
84219	62_LFS.GH	3.1e-07	AT5G11380
84683	281_Storage.7.days	1.4e-07	AT5G13820		5 : 4697537
84683	279_DSDS50	3.21e-07	AT5G13820
84729	7_FT22	2.43e-11	AT5G14060		no
84729	6_FT16	7.88e-11	AT5G14060		no
84729	279_DSDS50	1.2e-10	AT5G14060.1		no
84729	281_Storage.7.days	3.85e-10	AT5G14060
84729	15_B11	4.56e-08	AT5G14060.1		no
84729	8_Seed.Dormancy	6.16e-08	AT5G14060
84730	277_Secondary.Dormancy	3.48e-08	AT5G14060
85970	175_Leaf.serr.22	5.46e-08	AT5G19090
86275	7_FT22	1.08e-12	AT5G20260		5 : 6685571
86275	47_0W.GH.FT	1.1e-12	AT5G20260	Exostosin family protein	no
86275	59_FT.GH	2.74e-11	AT5G20260	Exostosin family protein	5 : 6841037
86275	281_Storage.7.days	2.65e-07	AT5G20260	Exostosin family protein	5 : 6690646
88181	277_Secondary.Dormancy	9.62e-07	AT5G25940		no
89719	281_Storage.7.days	4.58e-12	AT5TE37190		no
89719	77_LES	1.39e-10	AT5TE37190
89719	279_DSDS50	6.5e-10	AT5TE37190		no
89719	79_LY	8.82e-07	AT5TE37190
89911	167_Chlorosis.10	7.63e-07	AT5G28442		no
97613	167_Chlorosis.10	9.44e-07	AT5G41910		no
99290	61_LC.Duration.GH	1.3e-07	AT5G45810		5 : 18608407
99290	62_LFS.GH	1.7e-07	AT5G45810
100158	8_Seed.Dormancy	1.5e-10	AT5G48560		no
100430	17_Mg25	1.45e-07	AT5G49330
100701	79_LY	6.41e-09	AT5G50150.1	http://www.sciencedirect.com/science/article/pii/S0960982217300623	no
103217	8_Seed.Dormancy	2.64e-07	AT5G59710		no
104470	62_LFS.GH	8.05e-08	AT5G64960		no
104470	61_LC.Duration.GH	1.19e-07	AT5G64960		no
104492	8_Seed.Dormancy	4.5e-07	AT5G65080		no

## Sheet: Supplemental Table 6
Supplementary Table 6. STR-phenotype associations are robust to adjustment for SNPs.
Phenotype	STR	SNP	Model	Log(L)	df	n	AIC	AICc
279_DSDS50	-	-	Y ~ K	-127.987	1	94	257.973	258.017
279_DSDS50	1175	-	Y ~ STR+K	-105.626	4	94	219.252	219.702
279_DSDS50	-	snp.1.1921587	Y ~ SNP+K	-126.031	2	94	256.062	256.193
279_DSDS50	1175	snp.1.1921587	Y ~ STR+SNP+K	-103.187	5	94	216.374	217.055
6_FT16	-	-	Y ~ K	-73.4358	1	95	148.871	148.915
6_FT16	65291	-	Y ~ STR+K	-34.0169	10	95	88.0337	90.6528
6_FT16	-	snp.4.581120	Y ~ SNP+K	-58.4831	2	95	120.966	121.097
6_FT16	65291	snp.4.581120	Y ~ STR+SNP+K	-25.638	11	95	73.276	76.4567
47_0W.GH.FT	-	-	Y ~ K	-87.899	1	95	177.798	177.841
47_0W.GH.FT	1665	-	Y ~ STR+K	-63.1215	3	95	132.243	132.507
47_0W.GH.FT	-	snp.1.2778963	Y ~ SNP+K	-73.1507	2	95	150.301	150.432
47_0W.GH.FT	1665	snp.1.2778963	Y ~ STR+SNP+K	-62.8396	4	95	133.679	134.124
32_avrPphB	-	-	Y ~ K	-52.2574	1	72	106.515	106.572
32_avrPphB	2479	-	Y ~ STR+K	-28.6504	10	72	22.9237	26.5302
32_avrPphB	-	snp.1.4143163	Y ~ SNP+K	-1.46184	2	72	-22.0379	-21.8639
32_avrPphB	2479	snp.1.4143163	Y ~ STR+SNP+K	13.0189	11	72	-4.03786	0.36214
6_FT16	-	-	Y ~ K	-73.4358	1	95	148.871	148.915
6_FT16	3692	-	Y ~ STR+K	-45.4189	6	95	102.838	103.792
6_FT16	-	snp.1.6369772	Y ~ SNP+K	-52.4504	2	95	108.901	109.031
6_FT16	3692	snp.1.6369772	Y ~ STR+SNP+K	-35.9998	7	95	85.9997	87.287
47_0W.GH.FT	-	-	Y ~ K	-87.899	1	95	177.798	177.841
47_0W.GH.FT	3950	-	Y ~ STR+K	-54.8188	2	95	113.638	113.768
47_0W.GH.FT	-	snp.1.6371576	Y ~ SNP+K	-61.1302	2	95	126.26	126.391
47_0W.GH.FT	3950	snp.1.6371576	Y ~ STR+SNP+K	-49.6845	3	95	105.369	105.633
277_Secondary.Dormancy	-	-	Y ~ K	-46.7142	1	52	95.4284	95.5084
277_Secondary.Dormancy	4806	-	Y ~ STR+K	-25.2828	9	52	68.5657	72.8514
277_Secondary.Dormancy	-	snp.1.7785207	Y ~ SNP+K	-45.481	2	52	94.962	95.2069
277_Secondary.Dormancy	4806	snp.1.7785207	Y ~ STR+SNP+K	-23.6343	10	52	67.2687	72.6345
47_0W.GH.FT	-	-	Y ~ K	-87.899	1	85	177.798	177.846
47_0W.GH.FT	37359	-	Y ~ STR+K	-38.2844	7	85	90.5689	92.0234
47_0W.GH.FT	-	snp.2.9602595	Y ~ SNP+K	-75.3569	2	85	154.714	154.86
47_0W.GH.FT	37359	snp.2.9602595	Y ~ STR+SNP+K	-37.349	8	85	90.6981	92.5928
7_FT22	-	-	Y ~ K	-99.4728	1	93	200.946	200.99
7_FT22	41068	-	Y ~ STR+K	-68.0483	7	93	150.096	151.414
7_FT22	-	snp.2.13886899	Y ~ SNP+K	-78.8189	2	93	161.638	161.771
7_FT22	41068	snp.2.13886899	Y ~ STR+SNP+K	-66.4338	9	93	150.868	153.036
47_0W.GH.FT	-	-	Y ~ K	-87.899	1	85	177.798	177.846
47_0W.GH.FT	str.43058	-	Y ~ STR+K	-53.1413	6	85	118.283	119.36
47_0W.GH.FT	-	snp.2.16917776	Y ~ SNP+K	-47.7003	2	85	99.4005	99.5469
47_0W.GH.FT	str.43058	snp.2.16917776	Y ~ STR+SNP+K	-44.9034	7	85	103.807	105.261
7_FT22	-	-	Y ~ K	-101.19	1	95	204.38	204.423
7_FT22	43970	-	Y ~ STR+K	-63.2308	10	95	146.462	149.081
7_FT22	-	snp.2.18439471	Y ~ SNP+K	-74.3099	2	95	152.62	152.75
7_FT22	43970	snp.2.18439471	Y ~ STR+SNP+K	-58.4855	11	95	138.971	142.152
277_Secondary.Dormancy	-	-	Y ~ K	-67.7072	1	77	137.414	137.468
277_Secondary.Dormancy	65213	-	Y ~ STR+K	-44.2961	10	77	108.592	111.926
277_Secondary.Dormancy	-	snp.4.429928	Y ~ SNP+K	-67.6963	2	77	139.393	139.555
277_Secondary.Dormancy	65213	snp.4.429928	Y ~ STR+SNP+K	-44.0524	11	77	110.105	114.166
7_FT22	-	-	Y ~ K	-99.4714	1	93	200.943	200.987
7_FT22	83235	-	Y ~ STR+K	-70.0039	5	93	150.008	150.697
7_FT22	-	snp.5.2265385	Y ~ SNP+K	-60.6886	2	93	125.377	125.51
7_FT22	83235	snp.5.2265385	Y ~ STR+SNP+K	-59.3508	6	93	130.702	131.678
17_Mg25	-	-	Y ~ K	-730.682	1	86	1463.37	1463.41
17_Mg25	83239	-	Y ~ STR+K	-705.452	7	86	1424.9	1426.34
17_Mg25	-	snp.5.2339456	Y ~ SNP+K	-715.06	2	86	1434.12	1434.26
17_Mg25	83239	snp.5.2339456	Y ~ STR+SNP+K	-701.285	8	86	1418.57	1420.44
7_FT22	-	-	Y ~ K	-76.0082	1	69	154.016	154.076
7_FT22	83458	-	Y ~ STR+K	-41.557	11	69	105.114	109.746
7_FT22	-	snp.5.2337756	Y ~ SNP+K	-36.8288	2	69	77.6575	77.8394
7_FT22	83458	snp.5.2337756	Y ~ STR+SNP+K	-31.4878	12	69	86.9756	92.547
281_Storage.7.days	-	-	Y ~ K	-127.181	1	65	256.363	256.426
281_Storage.7.days	84683	-	Y ~ STR+K	-103.579	9	65	225.158	228.431
281_Storage.7.days	-	snp.5.4697537	Y ~ SNP+K	-110.255	2	65	224.51	224.704
281_Storage.7.days	84683	snp.5.4697537	Y ~ STR+SNP+K	-98.7407	10	65	217.481	221.556
7_FT22	-	-	Y ~ K	-101.19	1	95	204.38	204.423
7_FT22	86275	-	Y ~ STR+K	-73.639	3	95	153.278	153.542
7_FT22	-	snp.5.6685571	Y ~ SNP+K	-62.9458	2	95	129.892	130.022
7_FT22	86275	snp.5.6685571	Y ~ STR+SNP+K	-54.8372	4	95	117.674	118.119
61_LC.Duration.GH	-	-	Y ~ K	8.45985	1	53	-14.9197	-14.8413
61_LC.Duration.GH	99290	-	Y ~ STR+K	31.0161	8	53	-46.0322	-42.7595
61_LC.Duration.GH	-	snp.5.18608407	Y ~ SNP+K	14.4146	2	53	-24.8292	-24.5892
61_LC.Duration.GH	99290	snp.5.18608407	Y ~ STR+SNP+K	31.0907	9	53	-44.1814	-39.9954

## Sheet: Supplemental Table 7
Supplemental Table S7. Analysis of variance in the phenotype of days to flowering (long days) with respect to associated SNP and STR loci. Sums of squares represent marginal contributions (“type II”).
Locus	Sum of Squares	DF	F-value	p-value
snp.1.3895353	1153.6	1	2.353	0.1316
snp.2.9581605	508	1	1.0362	0.3138
snp.5.19508285	191.7	1	0.391	0.5347
snp.5.25386559	39.5	1	0.0805	0.7778
STR 37359	1149.9	6	0.3909	0.8813
STR 3950	15.4	1	0.0314	0.8602
STR 43058	1338.2	5	0.5459	0.7406
STR 43970	3336.3	7	0.9721	0.4622
STR 65291	6233	8	1.5892	0.1531
STR 81421	4313.7	12	0.7332	0.7123
Residuals	23532.8	48	-	-

## Sheet: Supplemental Table 8
Supplementary Table 8. Sequencing libraries used in this study
Strain	Barcode ID (SLXA_PE_MIPBC)	Demultiplexed reads	Forward read file	Barcode
Col	1A	1996654	max-1_S1_R1_001.fastq.gz	GTTAAGAC
Bur-0	1B	2075081	max-2_S2_R1_001.fastq.gz	TCTAAGTT
CIBC-17	1C	2241577	max-3_S3_R1_001.fastq.gz	TGTACATT
Ga-0	1D	1836433	max-4_S4_R1_001.fastq.gz	AATACCGC
HR-10	1E	2199476	max-5_S5_R1_001.fastq.gz	TGTCTATG
Mrk-0	1F	1676893	max-6_S6_R1_001.fastq.gz	TCACTGTT
PNA-10	1G	1985629	max-7_S7_R1_001.fastq.gz	TTGTATTC
Var2-1	1H	1154427	max-8_S8_R1_001.fastq.gz	AGACTAAC
Fei-0	2A	1950862	max-9_S9_R1_001.fastq.gz	ATTGTCAA
Mr-0	2B	2147955	max-10_S10_R1_001.fastq.gz	GTTCTACA
Omo2-1	2C	2073289	max-11_S11_R1_001.fastq.gz	TTCATTCG
Pu2-7	2D	1993609	max-12_S12_R1_001.fastq.gz	AAGCGTCA
Ren-11	2E	1893193	max-13_S13_R1_001.fastq.gz	CGTAGGAT
Rrs-7	2F	1681638	max-14_S14_R1_001.fastq.gz	AGTTAGCG
Ts-5	2G	2422435	max-15_S15_R1_001.fastq.gz	GAACGTCT
Van-0	2H	939100	max-16_S16_R1_001.fastq.gz	AGAACACT
Ag-0	3A	962418	max-17_S17_R1_001.fastq.gz	TGTTGGCA
Br-0	3B	1347638	max-18_S18_R1_001.fastq.gz	GGCTAATA
Bil-5	3C	1213599	max-19_S19_R1_001.fastq.gz	GCTAGAAT
Bil-7	3D	1343580	max-20_S20_R1_001.fastq.gz	TGTACTAA
Bor-1	3E	1036562	max-21_S21_R1_001.fastq.gz	AGTTACAC
Bor-4	3F	919269	max-22_S22_R1_001.fastq.gz	GTACACGA
Sq-1	3G	956004	max-23_S23_R1_001.fastq.gz	ACTGTAAG
Ull2-3	3H	1290015	max-24_S24_R1_001.fastq.gz	GATCATGA
C24	4A	1071102	max-25_S25_R1_001.fastq.gz	TGCTAACG
CIBC-5	4B	1025847	max-26_S26_R1_001.fastq.gz	TAATGCTC
N13	4C	1226458	max-27_S27_R1_001.fastq.gz	CTTGTTGA
Ct-1	4D	1215822	max-28_S28_R1_001.fastq.gz	GATACAAG
Est-1	4E	860248	max-29_S29_R1_001.fastq.gz	ATACAGCG
Eden-2	4F	897182	max-30_S30_R1_001.fastq.gz	CTGGATAG
Edi-0	4G	888234	max-31_S31_R1_001.fastq.gz	TCATCAGC
Ei-2	4H	830704	max-32_S32_R1_001.fastq.gz	TTATACCG
Fab-2	5A	897494	max-33_S33_R1_001.fastq.gz	GCTGATTC
Fab-4	5B	666869	max-34_S34_R1_001.fastq.gz	ATAAGGCC
Got-7	5C	1233928	max-35_S35_R1_001.fastq.gz	AAGACTAG
Got-22	5D	1258816	max-36_S36_R1_001.fastq.gz	TAGCAACA
Gu-0	5E	1492863	max-37_S37_R1_001.fastq.gz	CAAGTAAT
Gy-0	5F	1320342	max-38_S38_R1_001.fastq.gz	TCATGATG
HR-5	5G	1416518	max-39_S39_R1_001.fastq.gz	TAGCTCTT
Kas-2	5H	1332060	max-40_S40_R1_001.fastq.gz	ACTACATG
Knox-18	6A	1170851	max-41_S41_R1_001.fastq.gz	TGTGCCAT
Kz-1	6B	1581003	max-42_S42_R1_001.fastq.gz	GACTTCCA
Kz-9	6C	1487709	max-43_S43_R1_001.fastq.gz	TATTCTCG
Ler-1	6D	1857331	max-44_S44_R1_001.fastq.gz	CACTAGAT
LL-0	6E	1348606	max-45_S45_R1_001.fastq.gz	CTTCGCAT
Lov-1	6F	1118628	max-46_S46_R1_001.fastq.gz	CTAGCGAT
Lov-5	6G	1414267	max-47_S47_R1_001.fastq.gz	TACGTTAA
Sha	6H	1466799	max-48_S48_R1_001.fastq.gz	AAGTAGTC
Lp2-2	7A	1749273	max-49_S49_R1_001.fastq.gz	GACGTATC
Lz-0	7B	1952040	max-50_S50_R1_001.fastq.gz	ACGTTCAG
Ms-0	7C	2577363	max-51_S51_R1_001.fastq.gz	AGCTATAT
Mt-0	7D	1697776	max-52_S52_R1_001.fastq.gz	AGTGCGAA
Mz-0	7E	2126811	max-53_S53_R1_001.fastq.gz	CAATGGTA
NFA-8	7F	1967962	max-54_S54_R1_001.fastq.gz	ATTCCGAT
NFA-10	7G	1472754	max-55_S55_R1_001.fastq.gz	AGCTGTTG
Nok-3	7H	1526462	max-56_S56_R1_001.fastq.gz	TTCGACTC
Omo2-3	8A	1429607	max-57_S57_R1_001.fastq.gz	CGAATGGT
Oy-0	8B	2233747	max-58_S58_R1_001.fastq.gz	TAGTGTAC
PNA-17	8C	1976257	max-59_S59_R1_001.fastq.gz	ACGCATGA
Pro-0	8D	1865457	max-60_S60_R1_001.fastq.gz	TTCGTACA
Pu2-23	8E	1806653	max-61_S61_R1_001.fastq.gz	TTCTGCTA
Ra-0	8F	1570877	max-62_S62_R1_001.fastq.gz	TGGAAGCA
Ren-1	8G	1619225	max-63_S63_R1_001.fastq.gz	GATGCTCA
Zdr-6	8H	1168035	max-64_S64_R1_001.fastq.gz	AGCCTGAA
An-0	9A	1679250	max-65_S65_R1_001.fastq.gz	CACCAGTA
Lp2-6	9B	1138548	max-66_S66_R1_001.fastq.gz	GTTACACC
Eden-1	9C	1082444	max-67_S67_R1_001.fastq.gz	GCGTTAGT
Se-0	9D	1208548	max-68_S68_R1_001.fastq.gz	TGACGTTC
Kin-0	9E	1069502	max-69_S69_R1_001.fastq.gz	TAGGCGTA
Knox-10	9F	916522	max-70_S70_R1_001.fastq.gz	AAGTGAGC
Kondara	9G	1111058	max-71_S71_R1_001.fastq.gz	CCGGAATA
Nd-1	9H	879850	max-72_S72_R1_001.fastq.gz	AATAGGCA
Rmx-A02	10A	1243242	max-73_S73_R1_001.fastq.gz	TTCAGGTC
Rmx-A180	10B	1414702	max-74_S74_R1_001.fastq.gz	TAATCGCT
RRS-10	10C	1242017	max-75_S75_R1_001.fastq.gz	CTTAGGTG
Sorbo	10D	1392370	max-76_S76_R1_001.fastq.gz	TTGATCTC
Spr1-2	10E	1480057	max-77_S77_R1_001.fastq.gz	TCTTACTG
Spr1-6	10F	1202091	max-78_S78_R1_001.fastq.gz	GAGTACAC
Sq-8	10G	1585701	max-79_S79_R1_001.fastq.gz	ACGTTACA
TAMM-2	10H	2152462	max-80_S80_R1_001.fastq.gz	TGGTAAGC
TAMM-27	11A	977572	max-81_S81_R1_001.fastq.gz	GATAGCAC
Ts-1	11B	912125	max-82_S82_R1_001.fastq.gz	GACTTAGG
Tsu-1	11C	1455572	max-83_S83_R1_001.fastq.gz	AGTCGTTA
Ull2-5	11D	826197	max-84_S84_R1_001.fastq.gz	CGTGATTA
Uod-1	11E	1173265	max-85_S85_R1_001.fastq.gz	TCAGTAGA
Uod-7	11F	1600032	max-86_S86_R1_001.fastq.gz	ATGTGTCT
Var2-6	11G	963037	max-87_S87_R1_001.fastq.gz	CAGAATAT
Wa-1	11H	1864690	max-88_S88_R1_001.fastq.gz	TAAGTCTG
Wei-0	12A	647551	max-89_S89_R1_001.fastq.gz	ATCGACAT
Ws-0	12B	2136761	max-90_S90_R1_001.fastq.gz	ACAGCTGT
Ws-2	12C	690268	max-91_S91_R1_001.fastq.gz	ATCACAAG
Wt-5	12D	1040948	max-92_S92_R1_001.fastq.gz	GTCGAATT
Yo-0	12E	2047591	max-93_S93_R1_001.fastq.gz	TGCCGATT
Zdr-1	12F	812041	max-94_S94_R1_001.fastq.gz	ACTAATGC
Bay-0	12G	1088655	max-95_S95_R1_001.fastq.gz	CTAGTAGG
Cvi-0	12H	940736	max-96_S96_R1_001.fastq.gz	TTAAGCCA

## Sheet: Supplemental Table 9
Supplemental Table S9. Details of sequencing runs used in this study.
Sequencing run		instrument, kit	demultiplexed reads	libraries	notes
Pilot	MiSeq v2, 300 cycle		15008516	5
Full experiment	NextSeq 500 v2, 300 cycle High Output		137132721	96	flow cell malfunction, lost ~60% of reads in demultiplexing

## Sheet: Supplemental Table 10
Supplementary Table 10. Primers used in this study.
Primer name	note	sequence
25822 F primer	amplifies str region	cttgtgctttcatcttagaatc
25822 R primer	amplifies str region	attccctctgagattccactc
78534 F primer	amplifies str region	CTGCAAAAGTTTCATCTTCATC
78534 R primer	amplifies str region	GAGATAATATTTCACCCAGAGA
81231 F primer	amplifies str region	GTTCCCATATATTTCTTTGACAC
81231 R primer	amplifies str region	GATATTGATGGTGACATAGACC
52814 F primer	amplifies str region	GTTATTTGAGAATTCTCTGTTTG
52814 R primer	amplifies str region	GTAGCCAGCTCAAAAAGTGTA
65400_intr_F	amplifies str region	CCTCTTTTATCCCTAATTTCCCGATC
65400_intr_span	use with 65400_intr_R to detect intron retention	CAA CAT ATT TCC TCT TAT GAT GAG GCA AG
65400_intr_R	amplifies str region	GAGTCACAAACCCAGCAAGGATTT
65400_rt_F	RT-PCR NTM1	CTTGTTTCACCTCTTGTGTTAATTCC
65400_rt_R	RT-PCR NTM1	GTTACCAAGGAACATCAAGTCC
5427_intr_f	amplifies str region	CTTTCACAATATGTAGATGGAAACGGTT
5427_intr_span	use with 5427_intr_R to detect intron retention	GATTTGATCAGGACGTAATTGATGAC
5427_intr_r	amplifies str region	GAT GAC CAT AAA TTG TTT TTG ACG GC
41915_intr_f	amplifies str region	CGCATGGATACCCCATCT
41915_intr_r	amplifies str region	CGTACTACTCATTCCAACATGTGAT
41915_rt_f	use with 41915_intr_R to detect intron retention	CTCTCGTTCTTCTGGGAAGGTT
5792_intr_f	amplifies str region	CAA ACA CTG CAG AGG CCA
5792_intr_r	amplifies str region	GCT GAT GGT GAT TGG CTT CA
5792_intr_span	use with 5792_intr_R to detect intron retention	CAC TGG GCA GCG AAG AGA GAA AC
7150_intr_f	amplifies str region	CTTGATAAGAAGTTCATGGCCAACA
7150_intr_r	amplifies str region	GTT GTA ATG GTA GGC GGA GTC
7150_intr_span	use with 7150_intr_f to detect intron retention	GTT TAT GTG GCA AAG ATG GGA CA
7358_intr_f	amplifies str region	GTT GAC AGT AGT TGA GTA TAG TGA GCT T
7358_intr_r	amplifies str region	CGG TCG CTA CTT GAT TAA GGA AA
7358_intr_span	use with 7358_intr_R to detect intron retention	CGG TGA CTT CTC CTC CTC
65291_intr_f	amplifies str region	CAC CAA ACA TAC AAC AAT CTC CAA TAA G
65291_intr_r	amplifies str region	CTT GAG CCA AAA TGG CAC AC
65291_RT_f	check expression of gene in T-DNA line with intr_r	CCT CTT GGA TGA ACT TTA ATT CTC CAT TT
ELF3_STR38753_41	amplifies str region	cccttc CCATGG GATTCCCACCTCCTGGTAAT
ELF3_STR38753_42	amplifies str region	ttttggGGCGCC GGTTCATTATCAGATCTCTG
84729_intr_f	amplifies str region	GTT CCA AGT ATT TAG AAG CAA TGG AGT
84729_intr_r	amplifies str region	GGA GAG CCC TCA CAC ATT G
6396_intr_f	amplifies str region	GAA ACA GCA GCA TCT GCT ACA
6396_intr_r	amplifies str region	CGA TGG ATT CGG TGA AGG ATA C
4806_intr_f	amplifies str region	GAG CCA CAC ATG GTG GTT
4806_intr_r	amplifies str region	CACTATCAGCTACCAAAATCCATCTC
str_47883_R	amplifies str region	GCA ACT GAT ATG TAT AAT AAT CAC CCA C
str_47883_F	amplifies str region	GGA ATT GAA GCT GGC ACA G
ubc21_66	RT-PCR control	GACCAAGATATTCCATCCTA
ubc21_67	RT-PCR control	GTTAAGAGGACTGTCCG
47883_rt_f	RT-PCR MEE36	GGAATCGAAACGTTTGAGGTTGATGCAGA
47883_rt_r	RT-PCR MEE36	GTC CAT GGA ACC CAA CAA GTT T
95706_str_f	Calmodulin1 RT-PCR	GCAAATGTTTTTGGTTAAACTCCTAGAA
95706_str_r	Calmodulin1 RT-PCR	GATCCGTGAGGCTGATGTTGAT
SALK_113736_LP	AT4G01390 T-DNA insertion	GTAGAGGGAGACATAATGTGTCC
SALK_113736_RP	AT4G01390 T-DNA insertion, can use with LBb1.3	GCGGGTTCAAATCTAGTAATATACTC
For primers involved in MIP library construction, see Nuttle et al. (2014) Nature Protocols.

[truncated: 1 more sheets: Supplemental Table 11]
