# Supplementary figures and images for: Massive variation of short tandem repeats with functional consequences across strains of Arabidopsis thaliana
Source: HighWire-hosted journal article supplement (doi:10.1101/gr.231753.117), 2018-07-03

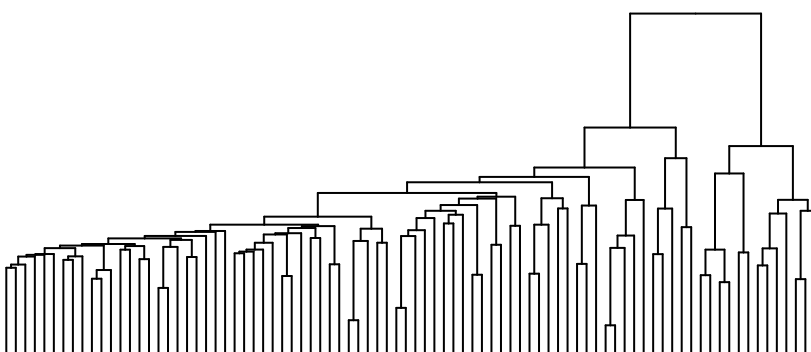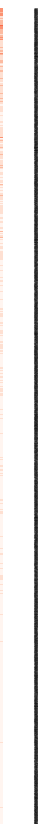

Supplement: Supplemental_File_S4.zip [file heatmap_strpheno_032217.pdf › Ath_STRs/output/heatmap_strpheno_032217.pdf]
